# Supplementary material for: Integrated transcriptomic and immune enzymatic analyses uncover coordinated immunometabolic responses in large yellow croaker (Larimichthys crocea) to Metanophrys sp. infection
Source: Front Immunol. 2025 Jul 16;16:1636453. doi: 10.3389/fimmu.2025.1636453 (PMC12307142; doi:10.3389/fimmu.2025.1636453)
Supplement: Supplementary file 2 [file Table2.xlsx]

## Sheet: C-vs-IN.total.DEG
GeneID	Length	C1	C2	C3	IN1	IN2	IN3	logFC	Pvalue	FDR	Gene_name	NR_ID	NR_annotation	GO_ID	GO_term	KO_ID	KO_gene	KO_Hyperlink	KEGG_Pathway	Pathway_ID	KOG_ID	KOG_annotation	Swiss-Prot_ID	Swiss-Prot_annotation
novel.12152	579	0	0	0	1.16	5.49	109.29	9.98224	7.41839e-05	0.000730517	-	KAE8300020.1	hypothetical protein D5F01_LYC00151 [Larimichthys crocea]	GO:0005576	extracellular region	-	-	-	-	-	-	-	-	-
gene17212	864	0.24	0	0	31.13	18.72	106.27	9.17165	5.97339e-20	1.72089e-17	LOC104933157	KAE8283948.1	Microfibril-associated glycoprotein 4 36 kDa microfibril-associated glycoprotein [Larimichthys crocea]	-	-	K25409	MFAP4	http://www.genome.jp/dbget-bin/www_bget?ko:K25409	-	-	-	-	sp|P55918|MFAP4_BOVIN	Microfibril-associated glycoprotein 4 OS=Bos taurus OX=9913 GN=MFAP4 PE=1 SV=2
gene3340	838	0.21	0	0	4.72	4.36	97.63	8.95238	2.06124e-06	3.43438e-05	LOC104918273	XP_027144328.1	serotransferrin [Larimichthys crocea]	GO:0046872;GO:0006811;GO:0055072;GO:0005615;GO:0005576	metal ion binding;ion transport;iron ion homeostasis;extracellular space;extracellular region	K14736	TF	http://www.genome.jp/dbget-bin/www_bget?ko:K14736	Ferroptosis;HIF-1 signaling pathway;Mineral absorption	ko04216,ko04066,ko04978	-	-	sp|P79819|TRFE_ORYLA	Serotransferrin OS=Oryzias latipes OX=8090 GN=tf PE=3 SV=1
gene3217	1319	0.06	0.05	0.13	3.98	3.03	98.67	8.71108	7.79716e-14	7.63567e-12	LOC104918124	XP_010728067.1	leptin [Larimichthys crocea]	-	-	-	-	-	-	-	-	-	sp|Q588F8|LEP_TETNG	Leptin OS=Tetraodon nigroviridis OX=99883 GN=lep PE=2 SV=2
gene4249	1111	0	0	0	1.17	0.19	14.65	8.57006	0.000335344	0.00259235	LOC104919239	XP_019116259.1	haptoglobin [Larimichthys crocea]	GO:0005615;GO:0004252	extracellular space;serine-type endopeptidase activity	K16142	HP	http://www.genome.jp/dbget-bin/www_bget?ko:K16142	-	-	-	-	sp|P19007|HPT_RABIT	Haptoglobin OS=Oryctolagus cuniculus OX=9986 GN=HP PE=1 SV=2
gene14103	585	0	0.17	0	12.21	3.03	60.96	8.5656	1.99691e-09	7.5018e-08	LOC104929852	XP_027138340.1	alpha-1-acid glycoprotein 1-like [Larimichthys crocea]	GO:0005576	extracellular region	-	-	-	-	-	-	-	-	-
gene14554	516	0	0	0.28	18.53	19.29	38.59	8.52314	1.72692e-11	1.04103e-09	LOC104930326	XP_027129724.1	collagenase 3 isoform X1 [Larimichthys crocea]	GO:0008270;GO:0031012;GO:0004222	zinc ion binding;extracellular matrix;metalloendopeptidase activity	K07994	MMP13	http://www.genome.jp/dbget-bin/www_bget?ko:K07994	Parathyroid hormone synthesis, secretion and action;Relaxin signaling pathway;IL-17 signaling pathway	ko04928,ko04926,ko04657	-	-	sp|O13065|MMP18_XENLA	Matrix metalloproteinase-18 OS=Xenopus laevis OX=8355 GN=mmp18 PE=2 SV=1
gene10648	2267	0	0	0	0.44	0.74	3.17	8.18331	7.57546e-09	2.49256e-07	LOC104926138	XP_010738231.3	toll-like receptor 5 [Larimichthys crocea]	GO:0034146;GO:0004888;GO:0016021;GO:0045087;GO:0042742;GO:0001819;GO:0002755	toll-like receptor 5 signaling pathway;transmembrane signaling receptor activity;integral component of membrane;innate immune response;defense response to bacterium;positive regulation of cytokine production;MyD88-dependent toll-like receptor signaling pathway	K10168	TLR5	http://www.genome.jp/dbget-bin/www_bget?ko:K10168	Inflammatory bowel disease;Legionellosis;Pathogenic Escherichia coli infection;Salmonella infection;Shigellosis;Toll-like receptor signaling pathway	ko05321,ko05134,ko05130,ko05132,ko05131,ko04620	-	-	sp|O60602|TLR5_HUMAN	Toll-like receptor 5 OS=Homo sapiens OX=9606 GN=TLR5 PE=1 SV=4
novel.12412	742	0	0	0	3.5	0.22	16.22	8.15024	4.08974e-07	8.45098e-06	-	-	-	-	-	-	-	-	-	-	-	-	-	-
gene21981	963	0	0	0	7.89	0.09	2.18	8.12229	0.00155582	0.00932441	LOC104938234	XP_010752898.2;KAE8292919.1	sodium/potassium-transporting ATPase subunit beta-1-interacting protein 3-like isoform X2 [Larimichthys crocea];Sodium/potassium-transporting ATPase subunit beta-1-interacting protein 4 [Larimichthys crocea]	GO:0016021;GO:0005886	integral component of membrane;plasma membrane	K22735	NKAIN	http://www.genome.jp/dbget-bin/www_bget?ko:K22735	-	-	-	-	sp|Q66KZ9|NKAI3_XENLA;sp|Q32NX4|NKAI4_XENLA	Sodium/potassium-transporting ATPase subunit beta-1-interacting protein 3 OS=Xenopus laevis OX=8355 GN=nkain3 PE=2 SV=1;Sodium/potassium-transporting ATPase subunit beta-1-interacting protein 4 OS=Xenopus laevis OX=8355 GN=nkain4 PE=2 SV=1
novel.5427	605	0	0	0	12.07	1.01	5.36	7.91999	2.3055e-07	5.13217e-06	nt5c2	XP_023128973.1	cytosolic purine 5&apos;-nucleotidase isoform X3 [Amphiprion ocellaris]	-	-	K01081	E3.1.3.5	http://www.genome.jp/dbget-bin/www_bget?ko:K01081	Nicotinate and nicotinamide metabolism;Purine metabolism;Pyrimidine metabolism	ko00760,ko00230,ko00240	-	-	sp|Q5EBF1|5NTC_XENTR	Cytosolic purine 5&apos;-nucleotidase OS=Xenopus tropicalis OX=8364 GN=nt5c2 PE=2 SV=1
gene19214	816	0	0	0	1.79	6.08	0.41	7.86254	1.83136e-06	3.10567e-05	nkx6-3	XP_027133487.1	homeobox protein Nkx-6.3 [Larimichthys crocea]	GO:0007275;GO:0005634;GO:0003677;GO:0000981	multicellular organism development;nucleus;DNA binding;DNA-binding transcription factor activity, RNA polymerase II-specific	K09351	NKX6-3	http://www.genome.jp/dbget-bin/www_bget?ko:K09351	-	-	-	-	sp|Q3UHX8|NKX63_MOUSE	Homeobox protein Nkx-6.3 OS=Mus musculus OX=10090 GN=Nkx6-3 PE=2 SV=1
gene14555	1737	0.33	0.03	0.18	13.46	17.44	31.45	7.74075	1.04065e-32	1.03132e-29	LOC104930327	KAE8288061.1;TKS83769.1	Collagenase 3 [Larimichthys crocea];Collagenase 3 [Collichthys lucidus]	GO:0004222;GO:0031012;GO:0008270	metalloendopeptidase activity;extracellular matrix;zinc ion binding	K07999;K07994	MMP20;MMP13	http://www.genome.jp/dbget-bin/www_bget?ko:K07999;http://www.genome.jp/dbget-bin/www_bget?ko:K07994	Parathyroid hormone synthesis, secretion and action;Relaxin signaling pathway;IL-17 signaling pathway	ko04928,ko04926,ko04657	-	-	sp|O62806|MMP13_RABIT;sp|P23097|MMP13_RAT	Collagenase 3 OS=Oryctolagus cuniculus OX=9986 GN=MMP13 PE=2 SV=1;Collagenase 3 (Fragment) OS=Rattus norvegicus OX=10116 GN=Mmp13 PE=1 SV=1
gene217	961	0.09	0.08	0	1.72	5.41	21.55	7.55646	2.93369e-09	1.0611e-07	cda	XP_010754014.3	cytidine deaminase [Larimichthys crocea]	GO:0008270;GO:0004126;GO:0047844	zinc ion binding;cytidine deaminase activity;deoxycytidine deaminase activity	K01489	cdd,CDA	http://www.genome.jp/dbget-bin/www_bget?ko:K01489	Pyrimidine metabolism;Drug metabolism - other enzymes	ko00240,ko00983	KOG0833	Cytidine deaminase	sp|P32320|CDD_HUMAN	Cytidine deaminase OS=Homo sapiens OX=9606 GN=CDA PE=1 SV=2
gene3310	2399	0.25	0.08	0	9.38	5.36	39.53	7.50494	2.16437e-22	8.51183e-20	LOC104918238	XP_010728216.1	interleukin-1 receptor type 2 isoform X1 [Larimichthys crocea]	GO:0016021;GO:0005886;GO:0004908	integral component of membrane;plasma membrane;interleukin-1 receptor activity	K04387	IL1R2,CD121b	http://www.genome.jp/dbget-bin/www_bget?ko:K04387	Cytokine-cytokine receptor interaction;Transcriptional misregulation in cancer;Prostate cancer;Fluid shear stress and atherosclerosis;Amoebiasis;Human T-cell leukemia virus 1 infection;Hematopoietic cell lineage	ko04060,ko05202,ko05215,ko05418,ko05146,ko05166,ko04640	-	-	sp|P27931|IL1R2_MOUSE	Interleukin-1 receptor type 2 OS=Mus musculus OX=10090 GN=Il1r2 PE=1 SV=1
gene17355	1476	0.04	0.04	0	4.09	0	11.47	7.39005	2.46319e-06	4.02029e-05	LOC104933321	XP_019123664.1	twinfilin-2-like isoform X1 [Larimichthys crocea]	GO:0003779;GO:0005856;GO:0030837	actin binding;cytoskeleton;negative regulation of actin filament polymerization	K08870	TWF	http://www.genome.jp/dbget-bin/www_bget?ko:K08870	-	-	KOG1747	Protein tyrosine kinase 9/actin monomer-binding protein	sp|Q6GMH3|TWF2_DANRE	Twinfilin-2 OS=Danio rerio OX=7955 GN=twf2 PE=2 SV=1
gene15893	1468	0.43	0.07	0.05	7.43	16.76	64.88	7.1953	1.53634e-17	3.2922e-15	LOC104931765	XP_010745154.2	uncharacterized protein LOC104931765 [Larimichthys crocea]	GO:0016021	integral component of membrane	-	-	-	-	-	-	-	-	-
gene10735	1178	0.15	0	0.18	2.99	5.07	20.53	6.90313	4.13123e-13	3.48147e-11	LOC104926232	XP_019116331.2;XP_027147256.1	uncharacterized protein LOC104926232 isoform X1 [Larimichthys crocea];uncharacterized protein LOC104926232 isoform X2 [Larimichthys crocea]	GO:0005886;GO:0016021	plasma membrane;integral component of membrane	K06733	SLAMF7,CD319	http://www.genome.jp/dbget-bin/www_bget?ko:K06733	-	-	-	-	-	-
novel.11525	797	0	0.57	1.05	51.15	49.1	8.23	6.73511	5.10124e-06	7.43461e-05	midn-a	TKS79957.1	Midnolin Midbrain nucleolar protein [Collichthys lucidus]	GO:0005634	nucleus	-	-	-	-	-	-	-	sp|Q7ZWN4|MIDNA_XENLA	Midnolin-A OS=Xenopus laevis OX=8355 GN=midn-a PE=2 SV=1
gene12651	2451	0.03	0.05	0.06	1.97	1.2	9.54	6.62327	1.82054e-13	1.65223e-11	LOC104928293	XP_027132868.1	hydroxycarboxylic acid receptor 3 [Larimichthys crocea]	GO:0004930;GO:0016021	G protein-coupled receptor activity;integral component of membrane	K08402	HCAR2_3,GPR109	http://www.genome.jp/dbget-bin/www_bget?ko:K08402	cAMP signaling pathway	ko04024	-	-	sp|P49019|HCAR3_HUMAN	Hydroxycarboxylic acid receptor 3 OS=Homo sapiens OX=9606 GN=HCAR3 PE=1 SV=3
gene1273	3872	0	0	0	0.5	0.04	0.08	6.57619	0.000191274	0.00161081	LOC104928637	KAE8299429.1	Receptor-type tyrosine-protein phosphatase-like N [Larimichthys crocea]	GO:0030141;GO:0004725;GO:0045202;GO:0030658	secretory granule;protein tyrosine phosphatase activity;synapse;transport vesicle membrane	K07817	PTPRN	http://www.genome.jp/dbget-bin/www_bget?ko:K07817	Type I diabetes mellitus	ko04940	-	-	sp|Q16849|PTPRN_HUMAN	Receptor-type tyrosine-protein phosphatase-like N OS=Homo sapiens OX=9606 GN=PTPRN PE=1 SV=1
gene4757	2343	0	0.03	0	0.45	0.91	0.65	6.53627	4.66677e-06	6.89469e-05	usp50	KAE8297500.1	putative ubiquitin carboxyl-terminal hydrolase 50 [Larimichthys crocea]	GO:0016579;GO:0006511;GO:0004843	protein deubiquitination;ubiquitin-dependent protein catabolic process;thiol-dependent deubiquitinase	K11839	USP8,UBP5	http://www.genome.jp/dbget-bin/www_bget?ko:K11839	Endocytosis;Mitophagy - animal;Cushing syndrome	ko04144,ko04137,ko04934	KOG1868	Ubiquitin C-terminal hydrolase	sp|Q4R6D3|UBP50_MACFA	Putative ubiquitin carboxyl-terminal hydrolase 50 OS=Macaca fascicularis OX=9541 GN=USP50 PE=2 SV=1
gene8962	670	4.51	4.2	2.95	27.5	75.43	973.27	6.51289	7.29124e-15	9.21672e-13	LOC104924350	XP_010735969.1	interleukin-8 [Larimichthys crocea]	GO:0030593;GO:0005153;GO:0005615;GO:0006954;GO:0008009;GO:0006955;GO:0042119	neutrophil chemotaxis;interleukin-8 receptor binding;extracellular space;inflammatory response;chemokine activity;immune response;neutrophil activation	K10030	IL8,CXCL8	http://www.genome.jp/dbget-bin/www_bget?ko:K10030	Cellular senescence;NF-kappa B signaling pathway;Phospholipase D signaling pathway;Cytokine-cytokine receptor interaction;Viral protein interaction with cytokine and cytokine receptor;Pathways in cancer;Transcriptional misregulation in cancer;Bladder cancer;Lipid and atherosclerosis;AGE-RAGE signaling pathway in diabetic complications;Alcoholic liver disease;Non-alcoholic fatty liver disease;Rheu…	ko04218,ko04064,ko04072,ko04060,ko04061,ko05200,ko05202,ko05219,ko05417,ko04933,ko04936,ko04932,ko05323,ko05120,ko05134,ko05130,ko05133,ko05132,ko05131,ko05135,ko05146,ko05142,ko05144,ko05171,ko05161,ko05163,ko05164,ko05167,ko04062,ko04657,ko04621,ko04622,ko04620	-	-	sp|P08317|IL8_CHICK	Interleukin-8 OS=Gallus gallus OX=9031 GN=CXCL8 PE=2 SV=1
gene14705	2821	0	0	0	0.02	0.58	0.07	6.4609	0.000867074	0.00574248	grm2	XP_019119024.2	metabotropic glutamate receptor 2 [Larimichthys crocea]	GO:0005886;GO:0016021;GO:0005634;GO:0004930;GO:0006471;GO:0003950	plasma membrane;integral component of membrane;nucleus;G protein-coupled receptor activity;protein ADP-ribosylation;NAD+ ADP-ribosyltransferase activity	K04605	GRM2	http://www.genome.jp/dbget-bin/www_bget?ko:K04605	Phospholipase D signaling pathway;Neuroactive ligand-receptor interaction;Cocaine addiction;Glutamatergic synapse	ko04072,ko04080,ko05030,ko04724	KOG1056	Glutamate-gated metabotropic ion channel receptor subunit GRM2 and related subunits, G-protein coupled receptor superfamily	sp|Q14416|GRM2_HUMAN	Metabotropic glutamate receptor 2 OS=Homo sapiens OX=9606 GN=GRM2 PE=1 SV=2
gene4691	1276	2.55	0.8	3.44	42.59	48.75	516.82	6.4515	4.74162e-17	9.17799e-15	LOC104919716	XP_019132010.1	mitochondrial uncoupling protein 2 [Larimichthys crocea]	GO:0031966;GO:0016021;GO:0006839	mitochondrial membrane;integral component of membrane;mitochondrial transport	K15103	UCP2_3,SLC25A8_9	http://www.genome.jp/dbget-bin/www_bget?ko:K15103	-	-	KOG0753	Mitochondrial fatty acid anion carrier protein/Uncoupling protein	sp|Q9W725|UCP2_CYPCA	Mitochondrial uncoupling protein 2 OS=Cyprinus carpio OX=7962 GN=ucp2 PE=2 SV=1
novel.3591	1579	0	0.08	0	1.42	1.2	3.85	6.45127	8.20711e-08	2.06436e-06	-	TWW61112.1	hypothetical protein D4764_05G0012020 [Takifugu flavidus]	GO:0003964;GO:0016706;GO:0008168	RNA-directed DNA polymerase activity;2-oxoglutarate-dependent dioxygenase activity;methyltransferase activity	K06467	CD22,SIGLEC2	http://www.genome.jp/dbget-bin/www_bget?ko:K06467	Cell adhesion molecules;B cell receptor signaling pathway;Hematopoietic cell lineage	ko04514,ko04662,ko04640	-	-	-	-
novel.14467	1140	0.07	0	0	3.56	0.66	0.06	6.44168	0.000203044	0.00169495	-	-	-	-	-	-	-	-	-	-	-	-	-	-
novel.12744	541	0	0	0	5.29	0.59	1.23	6.34146	0.000295798	0.00232953	-	-	-	-	-	-	-	-	-	-	-	-	-	-
gene21365	1443	0.03	0	0	0.08	0.44	1.64	6.32038	0.000438274	0.00324624	LOC104937579	XP_027131547.1	zinc finger BED domain-containing protein 1-like [Larimichthys crocea]	GO:0046983	protein dimerization activity	K24637	ZBED1	http://www.genome.jp/dbget-bin/www_bget?ko:K24637	-	-	-	-	sp|O96006|ZBED1_HUMAN	E3 SUMO-protein ligase ZBED1 OS=Homo sapiens OX=9606 GN=ZBED1 PE=1 SV=1
gene17168	669	0	0	0.09	3.45	0.88	0	6.31976	0.000624159	0.00436471	LOC104933114	XP_019115429.2	uncharacterized protein LOC104933114 [Larimichthys crocea]	-	-	K10268	FBXL2_20	http://www.genome.jp/dbget-bin/www_bget?ko:K10268	-	-	-	-	-	-
novel.4960	325	0	0	0	8.94	8.32	9.89	6.2788	6.78073e-05	0.000678785	-	XP_019126378.1	myoD family inhibitor domain-containing protein-like [Larimichthys crocea]	-	-	-	-	-	-	-	-	-	-	-
novel.9786	1305	0	0	0	1.54	0.07	0.24	6.2632	0.00101347	0.00652594	-	-	-	-	-	-	-	-	-	-	-	-	-	-
gene14553	1835	0.61	0.65	0.58	35.68	19.58	58.36	6.26242	4.54244e-55	5.62717e-51	LOC104930325	XP_019110592.2	collagenase 3 [Larimichthys crocea]	GO:0004222;GO:0031012;GO:0008270	metalloendopeptidase activity;extracellular matrix;zinc ion binding	K07994	MMP13	http://www.genome.jp/dbget-bin/www_bget?ko:K07994	Parathyroid hormone synthesis, secretion and action;Relaxin signaling pathway;IL-17 signaling pathway	ko04928,ko04926,ko04657	-	-	sp|O62806|MMP13_RABIT	Collagenase 3 OS=Oryctolagus cuniculus OX=9986 GN=MMP13 PE=2 SV=1
gene17165	3178	0.25	0.34	0.07	12.26	4.91	19.44	6.22236	6.25124e-29	4.07581e-26	ubqln1	XP_019115460.2	ubiquilin-1 [Larimichthys crocea]	-	-	K04523	UBQLN,DSK2	http://www.genome.jp/dbget-bin/www_bget?ko:K04523	Protein processing in endoplasmic reticulum;Amyotrophic lateral sclerosis	ko04141,ko05014	KOG0010	Ubiquitin-like protein	sp|Q9UMX0|UBQL1_HUMAN	Ubiquilin-1 OS=Homo sapiens OX=9606 GN=UBQLN1 PE=1 SV=2
novel.7531	1261	0	0	0	0.16	0.81	0.91	6.21492	0.000235079	0.00191275	-	XP_027133141.1	titin homolog isoform X3 [Larimichthys crocea]	-	-	-	-	-	-	-	-	-	-	-
novel.14115	1090	0.07	0	0	0.31	1.86	2.05	6.1731	5.3676e-05	0.000555041	-	-	-	-	-	-	-	-	-	-	-	-	-	-
gene8147	1219	1.88	0.85	0.44	12.03	27.48	172.49	6.16365	1.54106e-16	2.74686e-14	LOC104923462	TMS03291.1	Interleukin-1 beta [Larimichthys crocea]	GO:0001934;GO:0051924;GO:0005125;GO:0006955;GO:0005764;GO:0005615;GO:0005829;GO:0005149;GO:0006954	positive regulation of protein phosphorylation;regulation of calcium ion transport;cytokine activity;immune response;lysosome;extracellular space;cytosol;interleukin-1 receptor binding;inflammatory response	K04519	IL1B	http://www.genome.jp/dbget-bin/www_bget?ko:K04519	Necroptosis;MAPK signaling pathway;NF-kappa B signaling pathway;TNF signaling pathway;Cytokine-cytokine receptor interaction;Fluid shear stress and atherosclerosis;Lipid and atherosclerosis;Antifolate resistance;AGE-RAGE signaling pathway in diabetic complications;Alcoholic liver disease;Non-alcoholic fatty liver disease;Type I diabetes mellitus;Graft-versus-host disease;Inflammatory bowel diseas…	ko04217,ko04010,ko04064,ko04668,ko04060,ko05418,ko05417,ko01523,ko04933,ko04936,ko04932,ko04940,ko05332,ko05321,ko05323,ko05134,ko05130,ko05133,ko05132,ko05131,ko05152,ko05135,ko05143,ko05146,ko05142,ko05140,ko05144,ko05171,ko05168,ko05163,ko05164,ko05162,ko05010,ko05022,ko05020,ko04380,ko04625,ko04623,ko04640,ko04657,ko04621,ko04659,ko04620,ko04750	-	-	sp|Q9YGD3|IL1B_ONCMY	Interleukin-1 beta OS=Oncorhynchus mykiss OX=8022 GN=il1b PE=2 SV=1
gene5029	2974	0	0	0	0.21	0.06	0.48	6.10309	0.000260538	0.00208431	nefm	XP_010730547.3	neurofilament medium polypeptide [Larimichthys crocea]	GO:0005883;GO:0030424;GO:0033693;GO:0005198	neurofilament;axon;neurofilament bundle assembly;structural molecule activity	K04573	NEF3,NF-M	http://www.genome.jp/dbget-bin/www_bget?ko:K04573	Amyotrophic lateral sclerosis;Pathways of neurodegeneration - multiple diseases	ko05014,ko05022	-	-	sp|P08553|NFM_MOUSE	Neurofilament medium polypeptide OS=Mus musculus OX=10090 GN=Nefm PE=1 SV=4
gene8999	1815	0.09	0	0	0.66	0.36	4.1	6.08373	9.53571e-06	0.000127873	LOC104924406	XP_019110072.1	uncharacterized protein LOC104924406 isoform X1 [Larimichthys crocea]	GO:0005524;GO:0016021;GO:0004672	ATP binding;integral component of membrane;protein kinase activity	-	-	-	-	-	-	-	-	-
gene10981	419	0	0	0	4.49	0.78	7.6	6.05335	0.000299618	0.00235512	LOC104926507	TKS81703.1	Hepcidin Precursor [Collichthys lucidus]	GO:0042742;GO:0006879;GO:0005576	defense response to bacterium;cellular iron ion homeostasis;extracellular region	K23106	HAMP	http://www.genome.jp/dbget-bin/www_bget?ko:K23106	TGF-beta signaling pathway	ko04350	-	-	sp|A1Z0M0|HEPC_LARCR	Hepcidin OS=Larimichthys crocea OX=215358 GN=hamp PE=1 SV=2
novel.9872	1206	0	0	0.07	0	1.07	2.63	5.96452	0.000947015	0.0061709	ART5	XP_019113474.2	ecto-ADP-ribosyltransferase 5-like [Larimichthys crocea]	GO:0106274;GO:0006471;GO:0106275	NAD+-protein-arginine ADP-ribosyltransferase activity;protein ADP-ribosylation;NADP+-protein-arginine ADP-ribosyltransferase activity	K19977	ART5	http://www.genome.jp/dbget-bin/www_bget?ko:K19977	-	-	-	-	sp|Q0VC22|NAR5_BOVIN	Ecto-ADP-ribosyltransferase 5 OS=Bos taurus OX=9913 GN=ART5 PE=2 SV=1
novel.13042	780	0	0	0.1	1.41	0	2.21	5.9538	0.00329242	0.0172407	-	XP_008300115.1	PREDICTED: uncharacterized protein LOC103372291 isoform X3 [Stegastes partitus]	GO:0003677;GO:0006313;GO:0015074;GO:0016021	DNA binding;transposition, DNA-mediated;DNA integration;integral component of membrane	-	-	-	-	-	-	-	-	-
novel.20360	596	0.94	0.32	0.54	16.16	8.97	150.42	5.94628	7.81286e-12	5.05273e-10	-	XP_027130204.1;TMS09075.1	uncharacterized protein LOC113744510 [Larimichthys crocea];hypothetical protein E3U43_014622 [Larimichthys crocea]	GO:0005615;GO:0006955;GO:0008009	extracellular space;immune response;chemokine activity	-	-	-	-	-	-	-	-	-
gene10496	2244	0.12	0.22	0.39	8.5	13.58	7.84	5.93817	7.88229e-20	2.21922e-17	LOC104925989	XP_027129297.1	hephaestin-like protein 1 isoform X1 [Larimichthys crocea]	GO:0005507;GO:0016491	copper ion binding;oxidoreductase activity	K14735	HEPH	http://www.genome.jp/dbget-bin/www_bget?ko:K14735	Porphyrin and chlorophyll metabolism;Mineral absorption	ko00860,ko04978	-	-	sp|Q6MZM0|HPHL1_HUMAN	Ferroxidase HEPHL1 OS=Homo sapiens OX=9606 GN=HEPHL1 PE=1 SV=2
gene6830	936	0	0	0	0.08	0.16	2.86	5.89943	0.00280638	0.0151516	LOC104922047	XP_010733055.2	interleukin-6 [Larimichthys crocea]	GO:0072540;GO:0006953;GO:0005615;GO:0005138;GO:0005125	T-helper 17 cell lineage commitment;acute-phase response;extracellular space;interleukin-6 receptor binding;cytokine activity	K05405	IL6	http://www.genome.jp/dbget-bin/www_bget?ko:K05405	Cellular senescence;FoxO signaling pathway;HIF-1 signaling pathway;JAK-STAT signaling pathway;PI3K-Akt signaling pathway;TNF signaling pathway;Cytokine-cytokine receptor interaction;Viral protein interaction with cytokine and cytokine receptor;Pathways in cancer;Transcriptional misregulation in cancer;Hypertrophic cardiomyopathy;Lipid and atherosclerosis;Antifolate resistance;EGFR tyrosine kinase…	ko04218,ko04068,ko04066,ko04630,ko04151,ko04668,ko04060,ko04061,ko05200,ko05202,ko05410,ko05417,ko01523,ko01521,ko04933,ko04936,ko04931,ko04932,ko05332,ko05321,ko05323,ko05134,ko05130,ko05133,ko05132,ko05152,ko05135,ko05143,ko05146,ko05142,ko05144,ko05171,ko05169,ko05161,ko05168,ko05166,ko05163,ko05164,ko05167,ko05162,ko05010,ko05022,ko05020,ko04625,ko04623,ko04640,ko04657,ko04672,ko04621,ko04659…	-	-	sp|A0S0B0|IL6_PAROL	Interleukin-6 OS=Paralichthys olivaceus OX=8255 GN=il6 PE=2 SV=1
novel.5697	874	0	0	0	0	0.35	2.87	5.87063	0.00603846	0.0281537	hook2	XP_037621605.1	protein Hook homolog 2-like [Sebastes umbrosus]	-	-	K16611	HOOK2	http://www.genome.jp/dbget-bin/www_bget?ko:K16611	-	-	-	-	sp|Q6NRB0|HOOK2_XENLA	Protein Hook homolog 2 OS=Xenopus laevis OX=8355 GN=hook2 PE=2 SV=1
gene4692	1165	0.4	0.06	0	1.96	1.47	22.97	5.85333	4.18323e-08	1.11806e-06	dnajb13	KAE8287870.1	DnaJ-like protein subfamily B member 13 [Larimichthys crocea]	GO:0006457;GO:0051082	protein folding;unfolded protein binding	K09519	DNAJB13	http://www.genome.jp/dbget-bin/www_bget?ko:K09519	-	-	KOG0714	Molecular chaperone (DnaJ superfamily)	sp|Q80Y75|DJB13_MOUSE	DnaJ homolog subfamily B member 13 OS=Mus musculus OX=10090 GN=Dnajb13 PE=1 SV=1
gene16675	797	0.45	0.1	0.39	2.74	5.1	44.9	5.83469	8.22713e-10	3.4258e-08	hamp	XP_010746187.1	hepcidin [Larimichthys crocea]	GO:0042742;GO:0006879;GO:0005576	defense response to bacterium;cellular iron ion homeostasis;extracellular region	K23106	HAMP	http://www.genome.jp/dbget-bin/www_bget?ko:K23106	TGF-beta signaling pathway	ko04350	-	-	sp|Q801Y3|HEPC1_SALSA	Hepcidin-1 OS=Salmo salar OX=8030 GN=hamp1 PE=3 SV=1
gene4506	2071	0.03	0	0	0.37	0.61	0.4	5.81069	0.00010469	0.000974742	LOC104919519	XP_010729869.3	ras association domain-containing protein 8 [Larimichthys crocea]	GO:0007165	signal transduction	K09855	RASSF7_8	http://www.genome.jp/dbget-bin/www_bget?ko:K09855	-	-	KOG1574	Predicted cell growth/differentiation regulator, contains RA domain	sp|Q8NHQ8|RASF8_HUMAN	Ras association domain-containing protein 8 OS=Homo sapiens OX=9606 GN=RASSF8 PE=1 SV=2
gene6553	1608	3.16	4.67	2.48	336.17	8.56	69.75	5.80737	4.93652e-11	2.62462e-09	LOC104921740	TKS74135.1	Glutamine synthetase [Collichthys lucidus]	GO:0004356;GO:0005524;GO:0006542	glutamate-ammonia ligase activity;ATP binding;glutamine biosynthetic process	K01915	glnA,GLUL	http://www.genome.jp/dbget-bin/www_bget?ko:K01915	Necroptosis;Alanine, aspartate and glutamate metabolism;Arginine biosynthesis;Glyoxylate and dicarboxylate metabolism;Nitrogen metabolism;GABAergic synapse;Glutamatergic synapse	ko04217,ko00250,ko00220,ko00630,ko00910,ko04727,ko04724	KOG0683	Glutamine synthetase	sp|Q8HZM5|GLNA_CANLF	Glutamine synthetase OS=Canis lupus familiaris OX=9615 GN=GLUL PE=1 SV=3
novel.12413	391	0	0	0	2.9	0.44	10.92	5.7909	0.00188564	0.0109694	-	KAE8300191.1	hypothetical protein D5F01_LYC00327 [Larimichthys crocea]	-	-	-	-	-	-	-	-	-	-	-
gene22336	3219	3.64	3.72	4.04	72.56	91.6	397.15	5.77714	6.28959e-33	6.49296e-30	LOC104938602	AJA33609.1	complement component 7 [Larimichthys crocea]	GO:0006958;GO:0005579;GO:0045087;GO:0005576;GO:0019835	complement activation, classical pathway;membrane attack complex;innate immune response;extracellular region;cytolysis	K03996	C7	http://www.genome.jp/dbget-bin/www_bget?ko:K03996	Systemic lupus erythematosus;Coronavirus disease - COVID-19;Prion disease;Complement and coagulation cascades	ko05322,ko05171,ko05020,ko04610	-	-	sp|Q29RQ1|CO7_BOVIN	Complement component C7 OS=Bos taurus OX=9913 GN=C7 PE=2 SV=1
gene5030	2263	0	0.05	0.05	2.05	0.45	1.04	5.73471	3.92591e-07	8.16009e-06	LOC104920106	XP_019115674.1	neurofilament light polypeptide [Larimichthys crocea]	GO:0005882	intermediate filament	K04572	NEFL,NF-L	http://www.genome.jp/dbget-bin/www_bget?ko:K04572	Amyotrophic lateral sclerosis;Pathways of neurodegeneration - multiple diseases	ko05014,ko05022	-	-	sp|P08551|NFL_MOUSE	Neurofilament light polypeptide OS=Mus musculus OX=10090 GN=Nefl PE=1 SV=5
gene21598	962	1.47	3.2	1.1	131.98	14.23	86.16	5.71349	8.65615e-17	1.58863e-14	LOC104937830	KAE8279457.1	Selection and upkeep of intraepithelial T-cells protein 1 [Larimichthys crocea]	GO:0016021;GO:0005886	integral component of membrane;plasma membrane	K17270	MOG	http://www.genome.jp/dbget-bin/www_bget?ko:K17270	-	-	-	-	sp|P78410|BT3A2_HUMAN	Butyrophilin subfamily 3 member A2 OS=Homo sapiens OX=9606 GN=BTN3A2 PE=1 SV=2
gene3433	441	0	0	0	1.19	0.62	7.8	5.68717	0.00216242	0.01226	tshb	XP_027135406.1	thyrotropin subunit beta [Larimichthys crocea]	GO:0005179;GO:0005576	hormone activity;extracellular region	K05251	TSHB	http://www.genome.jp/dbget-bin/www_bget?ko:K05251	cAMP signaling pathway;Neuroactive ligand-receptor interaction;Autoimmune thyroid disease;Regulation of lipolysis in adipocytes;Thyroid hormone synthesis	ko04024,ko04080,ko05320,ko04923,ko04918	-	-	sp|P37240|TSHB_ONCMY	Thyrotropin subunit beta OS=Oncorhynchus mykiss OX=8022 GN=tshb PE=1 SV=1
novel.18752	249	46.32	0	0	442.1	402.85	712.69	5.68197	1.42282e-11	8.81296e-10	-	-	-	-	-	-	-	-	-	-	-	-	-	-
gene15574	5551	0.01	0	0	0.25	0.07	0.15	5.65275	0.00020614	0.0017179	LOC104931415	XP_010744718.2	protogenin B [Larimichthys crocea]	GO:0005886;GO:0016021	plasma membrane;integral component of membrane	-	-	-	-	-	-	-	sp|Q2EY14|PRTGA_DANRE	Protogenin A OS=Danio rerio OX=7955 GN=prtga PE=2 SV=1
novel.16755	894	0	0	0	0.66	0.25	1.35	5.63619	0.00133063	0.00819888	-	-	-	-	-	-	-	-	-	-	-	-	-	-
gene9177	4488	0.1	0.09	0.08	1.75	2.59	6.29	5.59517	5.79677e-24	2.93103e-21	LOC104924607	KAE8287565.1;XP_019108719.2;XP_019108721.2	MAP7 domain-containing protein 2 [Larimichthys crocea];MAP7 domain-containing protein 2 isoform X1 [Larimichthys crocea];MAP7 domain-containing protein 2 isoform X4 [Larimichthys crocea]	GO:0000226;GO:0015630	microtubule cytoskeleton organization;microtubule cytoskeleton	K24203	MAP7D2	http://www.genome.jp/dbget-bin/www_bget?ko:K24203	-	-	-	-	sp|A2AG50|MA7D2_MOUSE;sp|Q96T17|MA7D2_HUMAN	MAP7 domain-containing protein 2 OS=Mus musculus OX=10090 GN=Map7d2 PE=1 SV=1;MAP7 domain-containing protein 2 OS=Homo sapiens OX=9606 GN=MAP7D2 PE=1 SV=2
gene20238	819	2.73	2.66	0.88	61.29	38.22	149.4	5.57894	1.45854e-31	1.3384e-28	LOC104936420	NP_001290318.1	dispanin subfamily A member 2b-like [Larimichthys crocea]	GO:0016021	integral component of membrane	K06566	IFITM	http://www.genome.jp/dbget-bin/www_bget?ko:K06566	-	-	-	-	sp|Q91499|DSA2B_TORMA	Dispanin subfamily A member 2b OS=Torpedo marmorata OX=7788 PE=2 SV=1
gene6999	849	1.03	0.09	0.24	5.25	12.29	37.11	5.57031	4.3205e-12	2.90882e-10	LOC104922235	NP_001290275.1	CD209 antigen-like protein E precursor [Larimichthys crocea]	GO:0030246	carbohydrate binding	K10059	CLEC4E,MINCLE	http://www.genome.jp/dbget-bin/www_bget?ko:K10059	Tuberculosis;C-type lectin receptor signaling pathway	ko05152,ko04625	KOG4297	C-type lectin	sp|A6QP79|COL12_BOVIN	Collectin-12 OS=Bos taurus OX=9913 GN=COLEC12 PE=2 SV=1
gene13364	514	2.66	3.09	4.17	160.26	83.05	58.18	5.56445	1.63554e-19	4.45299e-17	LOC104929057	-	-	-	-	-	-	-	-	-	-	-	-	-
gene9523	1181	0	0.06	0	1.53	0.17	0.8	5.52233	0.000639392	0.00444115	LOC104924947	TMS16938.1	Complement C1q and tumor necrosis factor-related protein 9A [Larimichthys crocea]	GO:0005576	extracellular region	K24213	C1QTNF9	http://www.genome.jp/dbget-bin/www_bget?ko:K24213	-	-	-	-	sp|Q4ZJN1|C1QT9_MOUSE	Complement C1q and tumor necrosis factor-related protein 9 OS=Mus musculus OX=10090 GN=C1qtnf9 PE=1 SV=1
gene15397	1203	0.06	0	0	0.89	0.56	0.9	5.49272	0.00023944	0.00194334	kcnk3	XP_010744489.1	potassium channel subfamily K member 3 [Larimichthys crocea]	GO:0005252;GO:0016021;GO:0060047	open rectifier potassium channel activity;integral component of membrane;heart contraction	K04914	KCNK3,K2P3.1	http://www.genome.jp/dbget-bin/www_bget?ko:K04914	Cushing syndrome;Aldosterone synthesis and secretion;Cortisol synthesis and secretion	ko04934,ko04925,ko04927	KOG4404	Tandem pore domain K+ channel TASK3/THIK-1	sp|O14649|KCNK3_HUMAN;sp|O54912|KCNK3_RAT	Potassium channel subfamily K member 3 OS=Homo sapiens OX=9606 GN=KCNK3 PE=1 SV=1;Potassium channel subfamily K member 3 OS=Rattus norvegicus OX=10116 GN=Kcnk3 PE=2 SV=1
gene22843	3089	0	0	0.05	0.15	0.95	0.16	5.48817	0.000270873	0.00215654	LOC104939143	XP_010753933.1	large neutral amino acids transporter small subunit 4 [Larimichthys crocea]	GO:0022857;GO:0016021	transmembrane transporter activity;integral component of membrane	K08229	SLC43A2	http://www.genome.jp/dbget-bin/www_bget?ko:K08229	-	-	-	-	sp|A4IHK6|LAT4_XENTR	Large neutral amino acids transporter small subunit 4 OS=Xenopus tropicalis OX=8364 GN=slc43a2 PE=2 SV=1
gene5792	1490	0.15	0.53	0.11	6.95	9.08	8.82	5.45785	2.17622e-17	4.49316e-15	LOC104920920	XP_027141056.1	sorting nexin-16 isoform X1 [Larimichthys crocea]	GO:0035091	phosphatidylinositol binding	K17928	SNX16	http://www.genome.jp/dbget-bin/www_bget?ko:K17928	-	-	KOG2101	Intermediate filament-like protein, sorting nexins, and related proteins containing PX (PhoX) domain(s)	sp|P57768|SNX16_HUMAN	Sorting nexin-16 OS=Homo sapiens OX=9606 GN=SNX16 PE=1 SV=2
novel.21023	732	0.13	0	0	2	1.49	0.48	5.43148	0.00082889	0.00552058	Slc35f1	XP_035474294.1	LOW QUALITY PROTEIN: solute carrier family 35 member F1-like [Scophthalmus maximus]	-	-	K15287	SLC35F1_2	http://www.genome.jp/dbget-bin/www_bget?ko:K15287	-	-	KOG2766	Predicted membrane protein	sp|Q8BGK5|S35F1_MOUSE	Solute carrier family 35 member F1 OS=Mus musculus OX=10090 GN=Slc35f1 PE=1 SV=1
novel.21272	419	0	0	0	1.02	3.59	1.86	5.4268	0.00394013	0.0199756	-	-	-	-	-	-	-	-	-	-	-	-	-	-
gene15330	1441	0.2	0.05	0.06	1.81	2.69	5.89	5.40328	4.56941e-11	2.45047e-09	LOC104931154	XP_010744394.1	indoleamine 2,3-dioxygenase 2 [Larimichthys crocea]	GO:0051213;GO:0019441;GO:0046872;GO:0020037	dioxygenase activity;tryptophan catabolic process to kynurenine;metal ion binding;heme binding	K00463	IDO,INDO	http://www.genome.jp/dbget-bin/www_bget?ko:K00463	African trypanosomiasis;Tryptophan metabolism	ko05143,ko00380	-	-	sp|Q6ZQW0|I23O2_HUMAN	Indoleamine 2,3-dioxygenase 2 OS=Homo sapiens OX=9606 GN=IDO2 PE=1 SV=4
gene1991	2000	0	0	0	0.42	0.06	0.1	5.39109	0.00610919	0.0284353	LOC104936636	XP_010751007.2	schwannomin-interacting protein 1 isoform X4 [Larimichthys crocea]	-	-	-	-	-	-	-	-	-	sp|P0DPB3|SCHI1_HUMAN	Schwannomin-interacting protein 1 OS=Homo sapiens OX=9606 GN=SCHIP1 PE=1 SV=1
novel.21561	1521	0.24	0.09	0	7.15	1.47	0.09	5.3885	2.87952e-05	0.000328618	PSMB8	CDQ64639.1	unnamed protein product [Oncorhynchus mykiss]	GO:0003677;GO:0019905;GO:0006313;GO:0015074;GO:0016021	DNA binding;syntaxin binding;transposition, DNA-mediated;DNA integration;integral component of membrane	K06092	INADL,PATJ	http://www.genome.jp/dbget-bin/www_bget?ko:K06092	Tight junction;Hippo signaling pathway;Human papillomavirus infection	ko04530,ko04390,ko05165	-	-	sp|Q29576|PSB8_PIG	Proteasome subunit beta type-8 (Fragment) OS=Sus scrofa OX=9823 GN=PSMB8 PE=1 SV=1
gene7794	4062	0.13	0.01	0.18	4.29	1.46	4.98	5.38134	3.16517e-15	4.28526e-13	adamts13	XP_019130182.2;XP_019130183.2	A disintegrin and metalloproteinase with thrombospondin motifs 13 isoform X1 [Larimichthys crocea];A disintegrin and metalloproteinase with thrombospondin motifs 13 isoform X2 [Larimichthys crocea]	GO:0004222;GO:0007229	metalloendopeptidase activity;integrin-mediated signaling pathway	K08627	ADAMTS13	http://www.genome.jp/dbget-bin/www_bget?ko:K08627	-	-	-	-	sp|Q76LX8|ATS13_HUMAN	A disintegrin and metalloproteinase with thrombospondin motifs 13 OS=Homo sapiens OX=9606 GN=ADAMTS13 PE=1 SV=1
gene1681	3498	0.04	0.02	0	0.08	0.57	1.18	5.37126	1.56421e-05	0.000195405	LOC104932892	KAF3860399.1	hypothetical protein F7725_000654, partial [Dissostichus mawsoni]	GO:0005525;GO:0003924;GO:0007264;GO:0016021	GTP binding;GTPase activity;small GTPase mediated signal transduction;integral component of membrane	K07531	RND1	http://www.genome.jp/dbget-bin/www_bget?ko:K07531	Axon guidance	ko04360	KOG0393	Ras-related small GTPase, Rho type	sp|Q92730|RND1_HUMAN	Rho-related GTP-binding protein Rho6 OS=Homo sapiens OX=9606 GN=RND1 PE=1 SV=1
gene8793	1659	0	0.08	0.1	1.9	2.23	0.36	5.35674	4.12497e-06	6.21657e-05	LOC104924175	XP_010735741.3	rhodopsin kinase 2 [Larimichthys crocea]	GO:0005524;GO:0007165;GO:0004703	ATP binding;signal transduction;G protein-coupled receptor kinase activity	K00909	GRK1_7	http://www.genome.jp/dbget-bin/www_bget?ko:K00909	Endocytosis;Chemokine signaling pathway;Phototransduction	ko04144,ko04062,ko04744	KOG0986	G protein-coupled receptor kinase	sp|Q1XHL7|GRK7B_DANRE	Rhodopsin kinase grk7-b OS=Danio rerio OX=7955 GN=grk7b PE=1 SV=2
gene7202	1179	0.88	0.11	0.66	6.35	5.72	56.99	5.35586	3.74513e-11	2.06198e-09	LOC104922455	TMS09177.1;XP_010733583.2;XP_027131722.1	hypothetical protein E3U43_014724 [Larimichthys crocea];cAMP-responsive element modulator isoform X2 [Larimichthys crocea];cAMP-responsive element modulator-like isoform X2 [Larimichthys crocea]	GO:0003700;GO:0005634;GO:0003677	DNA-binding transcription factor activity;nucleus;DNA binding	K09052	CREM	http://www.genome.jp/dbget-bin/www_bget?ko:K09052	Adrenergic signaling in cardiomyocytes	ko04261	KOG3584	cAMP response element binding protein and related transcription factors	sp|P79145|CREM_CANLF	cAMP-responsive element modulator OS=Canis lupus familiaris OX=9615 GN=CREM PE=2 SV=2
gene9434	2084	8.04	4.24	9.61	232.54	171.73	263.83	5.32661	2.3923e-34	2.69416e-31	LOC104924845	KAE8291011.1	Midnolin-B Midbrain nucleolar protein B [Larimichthys crocea]	GO:0005634	nucleus	-	-	-	-	-	-	-	sp|Q7ZWN4|MIDNA_XENLA;sp|Q6NYU6|MIDN_DANRE	Midnolin-A OS=Xenopus laevis OX=8355 GN=midn-a PE=2 SV=1;Midnolin OS=Danio rerio OX=7955 GN=midn PE=2 SV=1
gene20163	1968	0	0	0	0.06	0.34	0.07	5.29011	0.00961705	0.0408875	LOC104936338	XP_019124922.1	dachshund homolog 2 [Larimichthys crocea]	-	-	-	-	-	-	-	KOG3915	Transcription regulator dachshund, contains SKI/SNO domain	sp|Q9UI36|DACH1_HUMAN	Dachshund homolog 1 OS=Homo sapiens OX=9606 GN=DACH1 PE=1 SV=4
novel.321	2984	0.02	0.18	0.15	0.4	0.68	13.58	5.28549	3.10282e-07	6.64438e-06	Prr18	XP_019125739.1	proline-rich protein 18 [Larimichthys crocea]	GO:0016192;GO:0016021;GO:0015031	vesicle-mediated transport;integral component of membrane;protein transport	-	-	-	-	-	-	-	sp|Q6PAN7|PRR18_MOUSE	Proline-rich protein 18 OS=Mus musculus OX=10090 GN=Prr18 PE=1 SV=2
gene22844	1650	1.08	1.52	1.07	29.83	28.72	51.46	5.27913	9.50834e-49	4.71158e-45	LOC104939144	KAE8287490.1	Hephaestin-like protein 1 [Larimichthys crocea]	GO:0016491;GO:0005507	oxidoreductase activity;copper ion binding	K14735	HEPH	http://www.genome.jp/dbget-bin/www_bget?ko:K14735	Porphyrin and chlorophyll metabolism;Mineral absorption	ko00860,ko04978	-	-	sp|Q9Z0Z4|HEPH_MOUSE;sp|Q9BQS7|HEPH_HUMAN	Hephaestin OS=Mus musculus OX=10090 GN=Heph PE=1 SV=3;Hephaestin OS=Homo sapiens OX=9606 GN=HEPH PE=1 SV=3
gene6076	1759	0.12	0.18	0.05	1.88	1.73	8.43	5.27087	5.66962e-12	3.73592e-10	slc14a1	XP_010731977.1	urea transporter 1 isoform X1 [Larimichthys crocea]	GO:0005886;GO:0016021;GO:0015204	plasma membrane;integral component of membrane;urea transmembrane transporter activity	K08716	SLC14A	http://www.genome.jp/dbget-bin/www_bget?ko:K08716	-	-	-	-	sp|Q28614|UT2_RABIT	Urea transporter 2 OS=Oryctolagus cuniculus OX=9986 GN=SLC14A2 PE=2 SV=1
novel.21851	384	0	0.48	1.22	21.43	10.79	9.63	5.21942	4.40581e-06	6.5758e-05	-	-	-	-	-	-	-	-	-	-	-	-	-	-
gene5935	1765	0	0	0	0.28	0.14	0.19	5.21554	0.00549272	0.0260854	LOC104921061	XP_010731796.3	nicalin-1 [Larimichthys crocea]	GO:0008235;GO:0009966;GO:0016021	metalloexopeptidase activity;regulation of signal transduction;integral component of membrane	-	-	-	-	-	-	-	sp|Q6NZ07|NCLN_DANRE	Nicalin-1 OS=Danio rerio OX=7955 GN=ncl1 PE=2 SV=1
novel.2795	690	0	0	0.5	1.47	2.14	12.51	5.19495	2.60067e-05	0.000301094	Nms	XP_019108464.1	neuromedin-S [Larimichthys crocea]	-	-	-	-	-	-	-	-	-	sp|Q5H8A1|NMS_MOUSE	Neuromedin-S OS=Mus musculus OX=10090 GN=Nms PE=2 SV=1
gene5666	2608	0.18	0.21	0.03	3.92	2.22	5.64	5.1546	2.31851e-19	6.24385e-17	lss	XP_010731449.3	lanosterol synthase isoform X1 [Larimichthys crocea]	GO:0042300;GO:0016104;GO:0005811;GO:0000250	beta-amyrin synthase activity;triterpenoid biosynthetic process;lipid droplet;lanosterol synthase activity	K01852	LSS,ERG7	http://www.genome.jp/dbget-bin/www_bget?ko:K01852	Steroid biosynthesis	ko00100	-	-	sp|P48450|LSS_RAT	Lanosterol synthase OS=Rattus norvegicus OX=10116 GN=Lss PE=1 SV=2
novel.10980	549	0	0.39	0	7.34	0.19	3.4	5.1473	0.00142531	0.00868294	-	-	-	-	-	-	-	-	-	-	-	-	-	-
gene6178	1182	4.77	2.19	5.77	154.99	43.64	166.82	5.13566	9.48248e-22	3.35626e-19	LOC104921330	KAE8289818.1	Glutathione-specific gamma-glutamylcyclotransferase 1 [Larimichthys crocea]	GO:0006751;GO:0016740;GO:0061928;GO:0003839	glutathione catabolic process;transferase activity;glutathione specific gamma-glutamylcyclotransferase activity;gamma-glutamylcyclotransferase activity	K07232	CHAC,chaC	http://www.genome.jp/dbget-bin/www_bget?ko:K07232	Glutathione metabolism	ko00480	KOG3182	Predicted cation transporter	sp|Q5SPB6|CHAC1_DANRE	Glutathione-specific gamma-glutamylcyclotransferase 1 OS=Danio rerio OX=7955 GN=chac1 PE=3 SV=1
novel.8988	466	0	0	0	1.04	0.82	3.12	5.11067	0.00764275	0.0339714	-	-	-	-	-	-	-	-	-	-	-	-	-	-
novel.6742	547	0.32	0.2	0.25	13.44	2.11	0.6	5.09762	0.000184042	0.00156052	MRAP	TKS80798.1	Melanocortin-2 receptor accessory protein 2A [Collichthys lucidus]	GO:0005886;GO:0016021;GO:0005789	plasma membrane;integral component of membrane;endoplasmic reticulum membrane	K22398	MRAP	http://www.genome.jp/dbget-bin/www_bget?ko:K22398	Cushing syndrome;Cortisol synthesis and secretion	ko04934,ko04927	-	-	sp|Q8TCY5|MRAP_HUMAN	Melanocortin-2 receptor accessory protein OS=Homo sapiens OX=9606 GN=MRAP PE=1 SV=2
gene16780	1010	0.08	0	0	0.14	0.28	2.5	5.0928	0.00357875	0.0184608	LOC104932721	XP_019133825.2	GTPase IMAP family member 7 [Larimichthys crocea]	GO:0005525	GTP binding	-	-	-	-	-	-	-	sp|Q8NHV1|GIMA7_HUMAN	GTPase IMAP family member 7 OS=Homo sapiens OX=9606 GN=GIMAP7 PE=1 SV=1
gene8328	2163	0.03	0	0	0.27	0.42	0	5.08287	0.0100178	0.0422967	LOC104923690	XP_027133831.1	calponin homology domain-containing protein DDB_G0272472-like [Larimichthys crocea]	-	-	-	-	-	-	-	-	-	-	-
novel.21496	2129	0	0.06	0.07	0.53	1.89	0.15	5.0575	8.31665e-05	0.00080114	-	TKS65157.1	hypothetical protein D9C73_028123 [Collichthys lucidus]	-	-	-	-	-	-	-	-	-	-	-
gene12350	1710	0.29	0.34	1.3	43.55	1.53	1.52	5.05705	0.00133988	0.00824767	lmod2	XP_010740496.2	leiomodin-2 [Larimichthys crocea]	GO:0051694;GO:0005523;GO:0030017;GO:0005856;GO:0003779	pointed-end actin filament capping;tropomyosin binding;sarcomere;cytoskeleton;actin binding	K22030	LMOD	http://www.genome.jp/dbget-bin/www_bget?ko:K22030	-	-	-	-	sp|Q6P5Q4|LMOD2_HUMAN	Leiomodin-2 OS=Homo sapiens OX=9606 GN=LMOD2 PE=1 SV=2
novel.13459	3683	0.02	0.06	0.02	0.56	1.18	0.35	5.02793	5.10275e-07	1.02185e-05	-	-	-	-	-	-	-	-	-	-	-	-	-	-
gene2031	357	0.7	0	0	11.18	1.22	4.94	5.0198	0.00348853	0.0180744	LOC104937144	-	-	-	-	-	-	-	-	-	-	-	-	-
gene21325	1242	0	0	0	0.16	0.16	0.63	5.01296	0.0108	0.0448435	zpld1	XP_019135003.1	zona pellucida-like domain-containing protein 1 isoform X1 [Larimichthys crocea]	GO:0016021	integral component of membrane	-	-	-	-	-	-	-	sp|C0H9B6|ZPLD1_SALSA	Zona pellucida-like domain-containing protein 1 OS=Salmo salar OX=8030 GN=zpld1 PE=1 SV=1
gene7759	1632	1.5	2.9	8.55	40.59	159.18	90.18	4.993	4.42753e-12	2.9728e-10	LOC104923042	XP_019126152.1;XP_010734323.2	serine/threonine-protein kinase Sgk1 isoform X2 [Larimichthys crocea];serine/threonine-protein kinase Sgk1 isoform X1 [Larimichthys crocea]	GO:0005524;GO:0004674	ATP binding;protein serine/threonine kinase activity	K13302	SGK1	http://www.genome.jp/dbget-bin/www_bget?ko:K13302	FoxO signaling pathway;PI3K-Akt signaling pathway;mTOR signaling pathway;Aldosterone-regulated sodium reabsorption	ko04068,ko04151,ko04150,ko04960	KOG0598	Ribosomal protein S6 kinase and related proteins	sp|Q9XT18|SGK1_RABIT	Serine/threonine-protein kinase Sgk1 OS=Oryctolagus cuniculus OX=9986 GN=SGK1 PE=2 SV=1
gene15588	564	0	0	0.24	1.74	1.67	1.71	4.99243	0.00167556	0.00991725	cib3	XP_005729163.1;XP_019119163.1	PREDICTED: calcium and integrin-binding family member 3 isoform X2 [Pundamilia nyererei];calcium and integrin-binding family member 3 [Larimichthys crocea]	GO:0005509	calcium ion binding	K23838	CIB3	http://www.genome.jp/dbget-bin/www_bget?ko:K23838	-	-	KOG0034;KOG0038	Ca2+/calmodulin-dependent protein phosphatase (calcineurin subunit B), EF-Hand superfamily protein;Ca2+-binding kinase interacting protein (KIP) (EF-Hand protein superfamily)	sp|Q96Q77|CIB3_HUMAN	Calcium and integrin-binding family member 3 OS=Homo sapiens OX=9606 GN=CIB3 PE=1 SV=3
gene10761	3048	0.51	0.52	0.05	8.35	5.13	12.58	4.95854	2.70095e-18	6.49697e-16	sqle	XP_010738385.3	squalene monooxygenase [Larimichthys crocea]	GO:0050660;GO:0004506;GO:0016021;GO:0016126;GO:0005789	flavin adenine dinucleotide binding;squalene monooxygenase activity;integral component of membrane;sterol biosynthetic process;endoplasmic reticulum membrane	K00511	SQLE,ERG1	http://www.genome.jp/dbget-bin/www_bget?ko:K00511	Steroid biosynthesis	ko00100	KOG1298	Squalene monooxygenase	sp|Q14534|ERG1_HUMAN	Squalene monooxygenase OS=Homo sapiens OX=9606 GN=SQLE PE=1 SV=3
novel.1451	1303	0	0.05	0	0.1	0.15	1.68	4.95854	0.00542954	0.0258682	X-element\ORF2	TKS65799.1	putative RNA-directed DNA polymerase from transposon X-element [Collichthys lucidus]	GO:0003964	RNA-directed DNA polymerase activity	K10042	SUCNR1,GPR91	http://www.genome.jp/dbget-bin/www_bget?ko:K10042	cAMP signaling pathway	ko04024	-	-	sp|Q9NBX4|RTXE_DROME	Probable RNA-directed DNA polymerase from transposon X-element OS=Drosophila melanogaster OX=7227 GN=X-element\ORF2 PE=3 SV=1
gene2404	2206	4.46	1.22	1.64	28.18	27.75	148.44	4.95297	2.63168e-16	4.52795e-14	steap4	XP_010755194.2;XP_010755195.2	metalloreductase STEAP4 isoform X1 [Larimichthys crocea];metalloreductase STEAP4 isoform X2 [Larimichthys crocea]	GO:0010008;GO:0055072;GO:0016021	endosome membrane;iron ion homeostasis;integral component of membrane	K19876	STEAP4	http://www.genome.jp/dbget-bin/www_bget?ko:K19876	-	-	-	-	sp|Q687X5|STEA4_HUMAN	Metalloreductase STEAP4 OS=Homo sapiens OX=9606 GN=STEAP4 PE=1 SV=1
gene2359	2739	0	0.02	0	0.02	0.28	0.3	4.93106	0.00554138	0.0262564	bicd1	XP_010755127.2	protein bicaudal D homolog 1 isoform X2 [Larimichthys crocea]	GO:0008093;GO:0003677;GO:0000981;GO:0005634;GO:0007275;GO:0070840	cytoskeletal anchor activity;DNA binding;DNA-binding transcription factor activity, RNA polymerase II-specific;nucleus;multicellular organism development;dynein complex binding	K18739	BICD	http://www.genome.jp/dbget-bin/www_bget?ko:K18739	-	-	KOG0999	Microtubule-associated protein Bicaudal-D	sp|Q96G01|BICD1_HUMAN	Protein bicaudal D homolog 1 OS=Homo sapiens OX=9606 GN=BICD1 PE=1 SV=3
novel.21760	615	0.35	0	0	3.27	0.61	4.86	4.92202	0.000583383	0.00411089	-	-	-	-	-	-	-	-	-	-	-	-	-	-
novel.20224	541	0.22	1	1.28	5.48	8.22	58.64	4.92012	2.03958e-08	5.91717e-07	-	TKS65594.1	hypothetical protein D9C73_028202 [Collichthys lucidus]	GO:0015074;GO:0003676	DNA integration;nucleic acid binding	-	-	-	-	-	-	-	-	-
gene19707	1320	5.33	0.62	3.23	59.81	24.17	164.57	4.91359	1.03983e-12	8.05085e-11	ppp1r3g	XP_010750048.1	protein phosphatase 1 regulatory subunit 3G [Larimichthys crocea]	-	-	-	-	-	-	-	-	-	sp|Q9CW07|PP13G_MOUSE	Protein phosphatase 1 regulatory subunit 3G OS=Mus musculus OX=10090 GN=Ppp1r3g PE=1 SV=2
gene19426	1683	0.04	0	0	0.37	0.19	0.56	4.90726	0.0021751	0.0123149	LOC104935544	KAE8279432.1	Endothelin-1 receptor [Larimichthys crocea]	GO:0048484;GO:0004962;GO:0005886;GO:0016021;GO:0008217;GO:0042310	enteric nervous system development;endothelin receptor activity;plasma membrane;integral component of membrane;regulation of blood pressure;vasoconstriction	K04197	EDNRA	http://www.genome.jp/dbget-bin/www_bget?ko:K04197	Calcium signaling pathway;cAMP signaling pathway;cGMP-PKG signaling pathway;Neuroactive ligand-receptor interaction;Pathways in cancer;Vascular smooth muscle contraction;Renin secretion	ko04020,ko04024,ko04022,ko04080,ko05200,ko04270,ko04924	-	-	sp|Q95L55|EDNRA_SHEEP	Endothelin-1 receptor OS=Ovis aries OX=9940 GN=EDNRA PE=2 SV=1
gene23047	933	0.09	0	0.21	0.47	4.13	0.51	4.89703	0.000522716	0.0037545	LOC104939359	XP_010754190.2	olfactory receptor 52D1 [Larimichthys crocea]	GO:0004930;GO:0016021;GO:0004984	G protein-coupled receptor activity;integral component of membrane;olfactory receptor activity	K04257	OLFR	http://www.genome.jp/dbget-bin/www_bget?ko:K04257	Olfactory transduction	ko04740	-	-	sp|Q9H346|O52D1_HUMAN	Olfactory receptor 52D1 OS=Homo sapiens OX=9606 GN=OR52D1 PE=2 SV=1
novel.9437	1110	0	0.08	0	1.33	0.13	0.21	4.89104	0.00730036	0.0327908	-	-	-	-	-	-	-	-	-	-	-	-	-	-
gene13679	3518	0.9	1.08	2.11	45.54	22.31	17.42	4.87589	3.27829e-16	5.45219e-14	fbxo30	TMS21297.1	F-box only protein 30 [Larimichthys crocea]	GO:0061630;GO:0008270	ubiquitin protein ligase activity;zinc ion binding	K10307	FBXO30	http://www.genome.jp/dbget-bin/www_bget?ko:K10307	-	-	-	-	sp|Q5XI67|FBX30_RAT	F-box only protein 30 OS=Rattus norvegicus OX=10116 GN=Fbxo30 PE=1 SV=1
gene12320	8052	2.81	4.28	7.43	175.86	30.94	151.34	4.8749	6.23909e-16	9.84583e-14	xirp1	XP_019112815.1;XP_010740449.2	xin actin-binding repeat-containing protein 1 isoform X2 [Larimichthys crocea];xin actin-binding repeat-containing protein 1 isoform X1 [Larimichthys crocea]	GO:0003779;GO:0030054;GO:0030036	actin binding;cell junction;actin cytoskeleton organization	-	-	-	-	-	KOG1700	Regulatory protein MLP and related LIM proteins	sp|Q5PZ43|XIRP1_DANRE	Xin actin-binding repeat-containing protein 1 OS=Danio rerio OX=7955 GN=xirp1 PE=1 SV=1
gene3957	1008	1.46	0.88	0.66	12.03	1.85	70.56	4.83139	7.08992e-09	2.35578e-07	LOC104918913	KAE8284453.1	Aquaporin-8 [Larimichthys crocea]	GO:0015267;GO:0016021	channel activity;integral component of membrane	K09869	AQP8	http://www.genome.jp/dbget-bin/www_bget?ko:K09869	Bile secretion	ko04976	KOG0223	Aquaporin (major intrinsic protein family)	sp|O94778|AQP8_HUMAN	Aquaporin-8 OS=Homo sapiens OX=9606 GN=AQP8 PE=1 SV=2
gene18977	1448	0.96	0.23	0.51	8.6	4.42	27.73	4.7895	3.88167e-14	3.99191e-12	LOC104935054	QBE90575.1	CXC chemokine receptor type 2 [Larimichthys crocea]	GO:0006935;GO:0016021;GO:0016494	chemotaxis;integral component of membrane;C-X-C chemokine receptor activity	K05050	CXCR2,IL8RB,CD182	http://www.genome.jp/dbget-bin/www_bget?ko:K05050	Endocytosis;Phospholipase D signaling pathway;Cytokine-cytokine receptor interaction;Viral protein interaction with cytokine and cytokine receptor;Epithelial cell signaling in Helicobacter pylori infection;Human cytomegalovirus infection;Chemokine signaling pathway	ko04144,ko04072,ko04060,ko04061,ko05120,ko05163,ko04062	-	-	sp|Q28422|CXCR2_GORGO	C-X-C chemokine receptor type 2 (Fragment) OS=Gorilla gorilla gorilla OX=9595 GN=CXCR2 PE=3 SV=1
novel.19341	1360	0.11	0.1	0	1.42	0.05	3.96	4.78337	0.000235033	0.00191275	At3g55350	XP_037553265.1	protein ALP1-like [Nematolebias whitei]	-	-	-	-	-	-	-	-	-	sp|Q9M2U3|ALPL_ARATH	Protein ALP1-like OS=Arabidopsis thaliana OX=3702 GN=At3g55350 PE=2 SV=1
novel.11951	588	1.33	0.17	2.18	25.31	6.16	57.23	4.75486	2.34733e-09	8.65439e-08	-	TKS79994.1	hypothetical protein D9C73_013773 [Collichthys lucidus]	GO:0005615;GO:0006955;GO:0008009	extracellular space;immune response;chemokine activity	-	-	-	-	-	-	-	-	-
gene14559	1230	0.06	0	0.14	0.32	1.92	1.52	4.74804	0.000158273	0.0013798	LOC104930329	XP_027129525.1	SAM domain-containing protein SAMSN-1 [Larimichthys crocea]	-	-	K23707	SAMSN1	http://www.genome.jp/dbget-bin/www_bget?ko:K23707	-	-	-	-	sp|P57725|SAMN1_MOUSE	SAM domain-containing protein SAMSN-1 OS=Mus musculus OX=10090 GN=Samsn1 PE=1 SV=2
novel.21857	547	0.44	0	0	4.43	0.96	3.42	4.74337	0.00102814	0.00660438	-	KAE8297755.1	hypothetical protein D5F01_LYC04396 [Larimichthys crocea]	GO:0016021	integral component of membrane	-	-	-	-	-	-	-	-	-
gene23766	1468	0.15	0.23	0.12	0.09	6.1	1.5	4.72012	6.08258e-05	0.000619663	LOC104940115	XP_027132276.1	dickkopf-related protein 2 isoform X2 [Larimichthys crocea]	GO:0030178;GO:0007275;GO:0005576	negative regulation of Wnt signaling pathway;multicellular organism development;extracellular region	K02165	DKK	http://www.genome.jp/dbget-bin/www_bget?ko:K02165	Wnt signaling pathway;Alzheimer disease;Pathways of neurodegeneration - multiple diseases	ko04310,ko05010,ko05022	-	-	sp|Q9QYZ8|DKK2_MOUSE	Dickkopf-related protein 2 OS=Mus musculus OX=10090 GN=Dkk2 PE=1 SV=2
novel.12745	964	0.17	1.64	0.2	18.32	0.93	24.84	4.71355	8.11863e-07	1.52615e-05	-	-	-	-	-	-	-	-	-	-	-	-	-	-
gene5850	1376	0	0	0.06	0.19	0.24	0.91	4.71294	0.00505519	0.0244242	gdf15	XP_010731684.3	growth/differentiation factor 15 [Larimichthys crocea]	GO:0008083;GO:0005576	growth factor activity;extracellular region	K05504	GDF15	http://www.genome.jp/dbget-bin/www_bget?ko:K05504	Cytokine-cytokine receptor interaction	ko04060	-	-	sp|Q99988|GDF15_HUMAN	Growth/differentiation factor 15 OS=Homo sapiens OX=9606 GN=GDF15 PE=1 SV=3
gene22459	643	16.9	5.12	4.64	102.44	84.56	387.8	4.68703	5.2594e-15	6.89454e-13	LOC104938738	NP_001290324.1;XP_027132854.1	leukocyte cell-derived chemotaxin-2-like precursor [Larimichthys crocea];leukocyte cell-derived chemotaxin-2-like isoform X1 [Larimichthys crocea]	GO:0046872	metal ion binding	-	-	-	-	-	-	-	sp|O88803|LECT2_MOUSE	Leukocyte cell-derived chemotaxin-2 OS=Mus musculus OX=10090 GN=Lect2 PE=1 SV=1
gene9712	1770	0	0	0.05	0.1	0.25	0.56	4.67753	0.00579041	0.0271556	tbkbp1	XP_019109749.1	TANK-binding kinase 1-binding protein 1 [Larimichthys crocea]	GO:0016301	kinase activity	K12652	TBKBP1	http://www.genome.jp/dbget-bin/www_bget?ko:K12652	RIG-I-like receptor signaling pathway	ko04622	-	-	sp|A2A9T0|TBKB1_MOUSE	TANK-binding kinase 1-binding protein 1 OS=Mus musculus OX=10090 GN=Tbkbp1 PE=1 SV=1
novel.12414	540	0	1.21	0.26	3.79	2.16	29.54	4.62986	2.37542e-05	0.000280121	-	KAF1395265.1	hypothetical protein PFLUV_G00009740 [Perca fluviatilis]	-	-	-	-	-	-	-	-	-	-	-
gene1456	1089	1.38	1.58	0.42	8.13	18.95	39.18	4.62795	4.95022e-15	6.55864e-13	LOC104930521	XP_010743632.3	DNA damage-inducible transcript 4 protein [Larimichthys crocea]	GO:0009968;GO:0005737	negative regulation of signal transduction;cytoplasm	K08270	DDIT4,REDD1	http://www.genome.jp/dbget-bin/www_bget?ko:K08270	Autophagy - animal;PI3K-Akt signaling pathway;mTOR signaling pathway;MicroRNAs in cancer	ko04140,ko04151,ko04150,ko05206	-	-	sp|Q7T346|DDIT4_DANRE	DNA damage-inducible transcript 4 protein OS=Danio rerio OX=7955 GN=ddit4 PE=2 SV=1
gene19952	1540	0.09	0.08	0.25	0.5	4.49	0.31	4.62572	7.67775e-05	0.000750686	LOC104936108	KAE8280807.1;XP_019126189.1;XP_019126188.1	Inactive phospholipase D5 [Larimichthys crocea];inactive phospholipase D5 isoform X3 [Larimichthys crocea];inactive phospholipase D5 isoform X2 [Larimichthys crocea]	GO:0003824;GO:0016021	catalytic activity;integral component of membrane	K16861	PLD5	http://www.genome.jp/dbget-bin/www_bget?ko:K16861	-	-	-	-	sp|Q8N7P1|PLD5_HUMAN;sp|Q3UNN8|PLD5_MOUSE	Inactive phospholipase D5 OS=Homo sapiens OX=9606 GN=PLD5 PE=2 SV=2;Inactive phospholipase D5 OS=Mus musculus OX=10090 GN=Pld5 PE=2 SV=1
gene12114	1753	3.09	1.05	4.2	42.08	25.91	115.02	4.62505	3.19378e-16	5.4018e-14	LOC104927721	XP_010740165.1	insulin-like growth factor-binding protein 1 [Larimichthys crocea]	GO:0005520;GO:0031099;GO:0031994;GO:0001666;GO:0031995;GO:0005737;GO:0008285;GO:0005576	insulin-like growth factor binding;regeneration;insulin-like growth factor I binding;response to hypoxia;insulin-like growth factor II binding;cytoplasm;negative regulation of cell population proliferation;extracellular region	K23578	IGFBP1	http://www.genome.jp/dbget-bin/www_bget?ko:K23578	-	-	-	-	sp|P24591|IBP1_BOVIN	Insulin-like growth factor-binding protein 1 OS=Bos taurus OX=9913 GN=IGFBP1 PE=2 SV=2
gene1988	878	0	0.19	0.25	2.58	1.32	3.31	4.59945	4.2536e-06	6.38324e-05	LOC104936617	XP_019117672.1	ADP-ribosylation factor-like protein 14 [Larimichthys crocea]	GO:0005525	GTP binding	K17200	ARL14,ARF7	http://www.genome.jp/dbget-bin/www_bget?ko:K17200	-	-	KOG0070	GTP-binding ADP-ribosylation factor Arf1	sp|Q8N4G2|ARL14_HUMAN	ADP-ribosylation factor-like protein 14 OS=Homo sapiens OX=9606 GN=ARL14 PE=1 SV=2
novel.12215	973	1.78	0.15	1.48	13.65	14.3	39.58	4.57528	6.3086e-12	4.12406e-10	-	TMS14653.1	hypothetical protein E3U43_023133 [Larimichthys crocea]	GO:0007155;GO:0016021;GO:0005178;GO:0030334	cell adhesion;integral component of membrane;integrin binding;regulation of cell migration	K06514	THY1,CD90	http://www.genome.jp/dbget-bin/www_bget?ko:K06514	Leukocyte transendothelial migration	ko04670	-	-	-	-
gene21146	3999	3.4	2.06	6.39	230.27	13.66	35.85	4.5745	1.23136e-07	2.91387e-06	fam134b	XP_027132573.1;XP_027127929.1	reticulophagy regulator 1 [Larimichthys crocea];reticulophagy regulator 1 [Larimichthys crocea]	GO:0061709;GO:0030176	reticulophagy;integral component of endoplasmic reticulum membrane	K23880	RETREG	http://www.genome.jp/dbget-bin/www_bget?ko:K23880	-	-	-	-	sp|Q8VE91|RETR1_MOUSE	Reticulophagy regulator 1 OS=Mus musculus OX=10090 GN=Retreg1 PE=1 SV=2
gene17370	1210	0.51	0.17	0.08	2.75	2.52	9.95	4.56335	5.55193e-10	2.40901e-08	LOC104933334	AEL33639.1;XP_027141777.1;KAE8289164.1	spleen c-type lectin receptor [Larimichthys crocea];C-type lectin domain family 7 member A-like isoform X1 [Larimichthys crocea];CD209 antigen-like protein C DC-SIGN-related protein 2 [Larimichthys crocea]	GO:0030246;GO:0016021	carbohydrate binding;integral component of membrane	K10061;K17517	CLEC4G;CLEC12B	http://www.genome.jp/dbget-bin/www_bget?ko:K10061;http://www.genome.jp/dbget-bin/www_bget?ko:K17517	-	-	-	-	sp|Q91ZW9|C209C_MOUSE	CD209 antigen-like protein C OS=Mus musculus OX=10090 GN=Cd209c PE=2 SV=1
novel.11089	1892	0.26	0.47	0.34	11.74	1.68	4.74	4.52829	3.3688e-10	1.52599e-08	-	XP_036937093.1	transmembrane protein 273-like isoform X1 [Acanthopagrus latus]	GO:0016021	integral component of membrane	-	-	-	-	-	-	-	-	-
gene19348	2760	0.17	0	0.12	0.89	0.42	3.18	4.52215	4.45671e-07	9.11804e-06	LOC104935465	XP_019126453.2	parathyroid hormone/parathyroid hormone-related peptide receptor isoform X2 [Larimichthys crocea]	GO:0007166;GO:0004930;GO:0005886;GO:0004991;GO:0016021	cell surface receptor signaling pathway;G protein-coupled receptor activity;plasma membrane;parathyroid hormone receptor activity;integral component of membrane	K04585	PTHR1	http://www.genome.jp/dbget-bin/www_bget?ko:K04585	Neuroactive ligand-receptor interaction;Parathyroid hormone synthesis, secretion and action;Endocrine and other factor-regulated calcium reabsorption	ko04080,ko04928,ko04961	-	-	sp|P25107|PTH1R_DIDVI	Parathyroid hormone/parathyroid hormone-related peptide receptor OS=Didelphis virginiana OX=9267 GN=PTH1R PE=1 SV=2
gene21495	2247	0.3	0.27	0.66	1.83	10.8	7.2	4.51494	9.25832e-10	3.78522e-08	slc25a48	XP_027141737.1;KAE8286348.1	solute carrier family 25 member 48 [Larimichthys crocea];Solute carrier family 25 member 48 [Larimichthys crocea]	GO:0016021;GO:0055085	integral component of membrane;transmembrane transport	K15124	SLC25A48	http://www.genome.jp/dbget-bin/www_bget?ko:K15124	-	-	KOG0762;KOG0758	Mitochondrial carrier protein;Mitochondrial carnitine-acylcarnitine carrier protein	sp|Q6DHS9|S2548_DANRE	Solute carrier family 25 member 48 OS=Danio rerio OX=7955 GN=slc25a48 PE=2 SV=1
novel.10666	270	0	9.98	3.14	130.84	24.84	40.43	4.49937	9.3989e-05	0.000891187	-	XP_019115808.1	telethonin [Larimichthys crocea]	-	-	K19879	TCAP	http://www.genome.jp/dbget-bin/www_bget?ko:K19879	-	-	-	-	-	-
gene2580	2137	0.45	0.35	0.44	2.27	0.59	26.28	4.48275	4.80417e-07	9.72453e-06	mmp13	XP_027135840.1	collagenase 3 [Larimichthys crocea]	GO:0005576;GO:0004222;GO:0030574;GO:0031012;GO:0008270	extracellular region;metalloendopeptidase activity;collagen catabolic process;extracellular matrix;zinc ion binding	K07994	MMP13	http://www.genome.jp/dbget-bin/www_bget?ko:K07994	Parathyroid hormone synthesis, secretion and action;Relaxin signaling pathway;IL-17 signaling pathway	ko04928,ko04926,ko04657	-	-	sp|P45452|MMP13_HUMAN	Collagenase 3 OS=Homo sapiens OX=9606 GN=MMP13 PE=1 SV=1
gene4116	1527	1.89	1.72	1.54	23.7	19.85	47.84	4.47747	3.97682e-39	7.03784e-36	rasl11b	XP_010729306.1	ras-like protein family member 11B [Larimichthys crocea]	GO:0016020;GO:0007165;GO:0003925;GO:0005525	membrane;signal transduction;G protein activity;GTP binding	K07853	RASL11B	http://www.genome.jp/dbget-bin/www_bget?ko:K07853	-	-	KOG0395	Ras-related GTPase	sp|Q6P0U3|RSLBB_DANRE	Ras-like protein family member 11B OS=Danio rerio OX=7955 GN=rasl11b PE=2 SV=1
novel.4962	6333	1.84	0.62	1.85	11.28	33.91	19.67	4.46665	3.26739e-12	2.26083e-10	Ppp1r3a	XP_019121331.2	protein phosphatase 1 regulatory subunit 3A [Larimichthys crocea]	GO:0016021	integral component of membrane	K07189	PPP1R3	http://www.genome.jp/dbget-bin/www_bget?ko:K07189	Insulin resistance;Insulin signaling pathway	ko04931,ko04910	-	-	sp|Q99MR9|PPR3A_MOUSE	Protein phosphatase 1 regulatory subunit 3A OS=Mus musculus OX=10090 GN=Ppp1r3a PE=1 SV=2
gene194	826	0.22	0.19	0.5	6.02	1.8	8.35	4.46636	2.93798e-08	8.188e-07	LOC104936911	XP_027134670.1	V-set and transmembrane domain-containing protein 2-like protein [Larimichthys crocea]	GO:0016021;GO:0005886	integral component of membrane;plasma membrane	-	-	-	-	-	-	-	sp|Q96N03|VTM2L_HUMAN	V-set and transmembrane domain-containing protein 2-like protein OS=Homo sapiens OX=9606 GN=VSTM2L PE=1 SV=1
gene13182	2030	0	0.06	0	0.12	0.06	1.21	4.44114	0.00783891	0.0346816	agt	XP_010741536.2	angiotensinogen [Larimichthys crocea]	GO:0003081;GO:0005615;GO:0042310	regulation of systemic arterial blood pressure by renin-angiotensin;extracellular space;vasoconstriction	K09821	AGT,SERPINA8	http://www.genome.jp/dbget-bin/www_bget?ko:K09821	Phospholipase D signaling pathway;Neuroactive ligand-receptor interaction;Pathways in cancer;Diabetic cardiomyopathy;Dilated cardiomyopathy;Hypertrophic cardiomyopathy;AGE-RAGE signaling pathway in diabetic complications;Cushing syndrome;Insulin resistance;Adrenergic signaling in cardiomyocytes;Vascular smooth muscle contraction;Aldosterone synthesis and secretion;Cortisol synthesis and secretion…	ko04072,ko04080,ko05200,ko05415,ko05414,ko05410,ko04933,ko04934,ko04931,ko04261,ko04270,ko04925,ko04927,ko04924,ko04614	-	-	sp|P01017|ANGT_BOVIN	Angiotensinogen OS=Bos taurus OX=9913 GN=AGT PE=1 SV=2
novel.3689	2072	0.03	0.06	0.04	1.49	0.23	0.25	4.43141	0.000271052	0.00215694	-	KAE8298420.1	hypothetical protein D5F01_LYC02919 [Larimichthys crocea]	GO:0016021;GO:0042054	integral component of membrane;histone methyltransferase activity	-	-	-	-	-	-	-	-	-
gene19271	2079	0	0.06	0	0.34	0.06	0.81	4.43001	0.00474987	0.0232205	LOC104935382	XP_010749513.1	1,25-dihydroxyvitamin D(3) 24-hydroxylase, mitochondrial [Larimichthys crocea]	GO:0004497;GO:0005506;GO:0016705;GO:0020037	monooxygenase activity;iron ion binding;oxidoreductase activity, acting on paired donors, with incorporation or reduction of molecular oxygen;heme binding	K07436	CYP24A1	http://www.genome.jp/dbget-bin/www_bget?ko:K07436	MicroRNAs in cancer;Steroid biosynthesis;Parathyroid hormone synthesis, secretion and action	ko05206,ko00100,ko04928	KOG0159	Cytochrome P450 CYP11/CYP12/CYP24/CYP27 subfamilies	sp|Q07973|CP24A_HUMAN	1,25-dihydroxyvitamin D(3) 24-hydroxylase, mitochondrial OS=Homo sapiens OX=9606 GN=CYP24A1 PE=1 SV=2
gene110	1099	1.51	1.82	4.51	53.82	30.08	43.91	4.42549	1.04162e-15	1.56408e-13	LOC104934928	TMS21830.1	hypothetical protein E3U43_012095 [Larimichthys crocea]	-	-	-	-	-	-	-	-	-	-	-
gene4731	974	0.34	0.08	0	1.83	2.69	1.27	4.41021	4.41792e-05	0.000470384	figf	XP_010730180.1	vascular endothelial growth factor D [Larimichthys crocea]	GO:0016020;GO:0008083	membrane;growth factor activity	K05449	VEGFC_D	http://www.genome.jp/dbget-bin/www_bget?ko:K05449	Focal adhesion;Calcium signaling pathway;MAPK signaling pathway;PI3K-Akt signaling pathway;Rap1 signaling pathway;Ras signaling pathway;TNF signaling pathway;Pathways in cancer;AGE-RAGE signaling pathway in diabetic complications;Relaxin signaling pathway	ko04510,ko04020,ko04010,ko04151,ko04015,ko04014,ko04668,ko05200,ko04933,ko04926	-	-	sp|P97946|VEGFD_MOUSE	Vascular endothelial growth factor D OS=Mus musculus OX=10090 GN=Vegfd PE=2 SV=1
gene1108	2119	2.31	7.98	5.95	26.96	9.51	326.16	4.406	1.93818e-07	4.41363e-06	LOC104926754	XP_010738994.1	heat shock 70 kDa protein [Larimichthys crocea]	GO:0016887;GO:0004013;GO:0006730;GO:0005524	ATP hydrolysis activity;adenosylhomocysteinase activity;one-carbon metabolic process;ATP binding	K03283	HSPA1s	http://www.genome.jp/dbget-bin/www_bget?ko:K03283	Endocytosis;MAPK signaling pathway;Protein processing in endoplasmic reticulum;Spliceosome;Lipid and atherosclerosis;Legionellosis;Toxoplasmosis;Measles;Prion disease;Longevity regulating pathway - multiple species;Estrogen signaling pathway;Antigen processing and presentation	ko04144,ko04010,ko04141,ko03040,ko05417,ko05134,ko05145,ko05162,ko05020,ko04213,ko04915,ko04612	KOG0101	Molecular chaperones HSP70/HSC70, HSP70 superfamily	sp|Q91233|HSP70_ONCTS	Heat shock 70 kDa protein OS=Oncorhynchus tshawytscha OX=74940 GN=hsp70 PE=2 SV=1
gene2595	2052	0.03	0.15	0.04	0.29	2.18	0.22	4.38738	0.000278164	0.00220891	LOC104940522	KAE8295537.1	von Willebrand factor A domain-containing protein 7 Protein G7c Precursor [Larimichthys crocea]	GO:0016021	integral component of membrane	K24511	VWA7	http://www.genome.jp/dbget-bin/www_bget?ko:K24511	-	-	-	-	sp|Q0V8J4|VWA7_BOVIN	von Willebrand factor A domain-containing protein 7 OS=Bos taurus OX=9913 GN=VWA7 PE=2 SV=1
gene4569	1248	0	0.06	0.07	0.9	0.54	0.34	4.38633	0.00240057	0.0133867	dnali1	XP_019122770.1	axonemal dynein light intermediate polypeptide 1 [Larimichthys crocea]	-	-	K10410	DNALI	http://www.genome.jp/dbget-bin/www_bget?ko:K10410	Amyotrophic lateral sclerosis;Huntington disease;Pathways of neurodegeneration - multiple diseases	ko05014,ko05016,ko05022	-	-	sp|Q6GN86|IDLC_XENLA	Axonemal dynein light intermediate polypeptide 1 OS=Xenopus laevis OX=8355 GN=dnali1 PE=2 SV=1
gene3357	1952	25.3	26.05	24.16	376.41	346.35	417.07	4.37556	1.00984e-37	1.66799e-34	LOC104918286	XP_010728290.2	glutamine synthetase [Larimichthys crocea]	GO:0004356;GO:0005524;GO:0006542	glutamate-ammonia ligase activity;ATP binding;glutamine biosynthetic process	K01915	glnA,GLUL	http://www.genome.jp/dbget-bin/www_bget?ko:K01915	Necroptosis;Alanine, aspartate and glutamate metabolism;Arginine biosynthesis;Glyoxylate and dicarboxylate metabolism;Nitrogen metabolism;GABAergic synapse;Glutamatergic synapse	ko04217,ko00250,ko00220,ko00630,ko00910,ko04727,ko04724	KOG0683	Glutamine synthetase	sp|Q8HZM5|GLNA_CANLF	Glutamine synthetase OS=Canis lupus familiaris OX=9615 GN=GLUL PE=1 SV=3
novel.19463	797	0.34	0.1	0	1.17	2.5	3.19	4.37508	6.27785e-05	0.000637198	-	KAF5889065.1	phosphopantothenoylcysteine decarboxylase subunit VHS3-like, partial [Clarias magur]	-	-	K14799	TSR1	http://www.genome.jp/dbget-bin/www_bget?ko:K14799	-	-	-	-	sp|P35072|TCB1_CAEBR	Transposable element Tcb1 transposase OS=Caenorhabditis briggsae OX=6238 PE=3 SV=1
gene7730	2672	0.05	0	0	0.15	0.26	0.35	4.37096	0.00279454	0.0150976	LOC104923012	KAE8291939.1	Transducin-like enhancer protein 4 Grg-4 Groucho-related protein 4 [Larimichthys crocea]	GO:0006355;GO:0005634	regulation of transcription, DNA-templated;nucleus	K04497	GRO,TLE	http://www.genome.jp/dbget-bin/www_bget?ko:K04497	MAPK signaling pathway - fly;Notch signaling pathway;Wnt signaling pathway	ko04013,ko04330,ko04310	KOG0639	Transducin-like enhancer of split protein (contains WD40 repeats)	sp|Q04727|TLE4_HUMAN	Transducin-like enhancer protein 4 OS=Homo sapiens OX=9606 GN=TLE4 PE=1 SV=3
gene16024	2983	0.7	0.51	0.87	0.94	6.08	34.23	4.35961	2.64031e-07	5.78424e-06	csf3	XP_010745320.1	granulocyte colony-stimulating factor [Larimichthys crocea]	GO:0006955;GO:0005125;GO:0005576	immune response;cytokine activity;extracellular region	K05423	CSF3,GCSF	http://www.genome.jp/dbget-bin/www_bget?ko:K05423	JAK-STAT signaling pathway;PI3K-Akt signaling pathway;Cytokine-cytokine receptor interaction;Malaria;Coronavirus disease - COVID-19;Hematopoietic cell lineage;IL-17 signaling pathway	ko04630,ko04151,ko04060,ko05144,ko05171,ko04640,ko04657	-	-	-	-
gene9182	1457	0.05	0.09	0	1.09	0.22	1.04	4.34802	0.000504652	0.00364952	LOC104924588	XP_010736285.2	choline-phosphate cytidylyltransferase B-like [Larimichthys crocea]	GO:0003824;GO:0008654;GO:0016779	catalytic activity;phospholipid biosynthetic process;nucleotidyltransferase activity	K00968	PCYT1	http://www.genome.jp/dbget-bin/www_bget?ko:K00968	Choline metabolism in cancer;Glycerophospholipid metabolism;Phosphonate and phosphinate metabolism	ko05231,ko00564,ko00440	KOG2804	Phosphorylcholine transferase/cholinephosphate cytidylyltransferase	sp|Q9Y5K3|PCY1B_HUMAN	Choline-phosphate cytidylyltransferase B OS=Homo sapiens OX=9606 GN=PCYT1B PE=1 SV=1
gene17287	3072	1.89	4.89	3.98	39.36	65.46	42.37	4.34458	1.28038e-15	1.87709e-13	LOC104933238	TMS03015.1;XP_010746935.1;XP_010746936.2	6-phosphofructo-2-kinase/fructose-2,6-bisphosphatase 3 [Larimichthys crocea];6-phosphofructo-2-kinase/fructose-2,6-bisphosphatase 3 isoform X1 [Larimichthys crocea];6-phosphofructo-2-kinase/fructose-2,6-bisphosphatase 3 isoform X2 [Larimichthys crocea]	GO:0006000;GO:0006003;GO:0005524;GO:0003873;GO:0004331	fructose metabolic process;fructose 2,6-bisphosphate metabolic process;ATP binding;6-phosphofructo-2-kinase activity;fructose-2,6-bisphosphate 2-phosphatase activity	K01103	PFKFB3	http://www.genome.jp/dbget-bin/www_bget?ko:K01103	AMPK signaling pathway;HIF-1 signaling pathway;Fructose and mannose metabolism	ko04152,ko04066,ko00051	KOG0234	Fructose-6-phosphate 2-kinase/fructose-2,6-biphosphatase	sp|Q16875|F263_HUMAN;sp|Q5R9C1|F263_PONAB	6-phosphofructo-2-kinase/fructose-2,6-bisphosphatase 3 OS=Homo sapiens OX=9606 GN=PFKFB3 PE=1 SV=1;6-phosphofructo-2-kinase/fructose-2,6-bisphosphatase 3 OS=Pongo abelii OX=9601 GN=PFKFB3 PE=2 SV=2
gene22841	1176	0.13	0	0.12	0.98	1.5	0.49	4.33376	0.000809743	0.00541636	LOC104939145	XP_026184371.1;XP_010753935.2	phosphatidylinositol transfer protein alpha isoform-like isoform X2 [Mastacembelus armatus];phosphatidylinositol transfer protein alpha isoform [Larimichthys crocea]	GO:0005548	phospholipid transporter activity	-	-	-	-	-	KOG3668	Phosphatidylinositol transfer protein	sp|Q2HJ54|PIPNA_BOVIN	Phosphatidylinositol transfer protein alpha isoform OS=Bos taurus OX=9913 GN=PITPNA PE=1 SV=3
gene6512	1375	0.75	1.74	2.02	19.49	26.43	20.88	4.32071	2.18218e-15	3.14336e-13	LOC104921699	XP_019111386.1	ras-related and estrogen-regulated growth inhibitor-like protein [Larimichthys crocea]	GO:0007165;GO:0016020;GO:0005525;GO:0003925	signal transduction;membrane;GTP binding;G protein activity	K17198	RERGL	http://www.genome.jp/dbget-bin/www_bget?ko:K17198	-	-	-	-	sp|Q6DGN0|RERGL_DANRE	Ras-related and estrogen-regulated growth inhibitor-like protein OS=Danio rerio OX=7955 GN=rergl PE=2 SV=1
gene18696	5202	3.04	2.23	4.17	19.06	33.69	114.76	4.31865	4.66777e-16	7.55873e-14	LOC104934764	XP_019128729.1	thrombospondin-1 [Larimichthys crocea]	GO:0006954;GO:0007155;GO:0005615;GO:0050840;GO:0008201;GO:0005509;GO:0016525	inflammatory response;cell adhesion;extracellular space;extracellular matrix binding;heparin binding;calcium ion binding;negative regulation of angiogenesis	K16857	THBS1	http://www.genome.jp/dbget-bin/www_bget?ko:K16857	p53 signaling pathway;Focal adhesion;Phagosome;PI3K-Akt signaling pathway;Rap1 signaling pathway;TGF-beta signaling pathway;ECM-receptor interaction;MicroRNAs in cancer;Proteoglycans in cancer;Bladder cancer;Malaria;Human papillomavirus infection	ko04115,ko04510,ko04145,ko04151,ko04015,ko04350,ko04512,ko05206,ko05205,ko05219,ko05144,ko05165	-	-	sp|Q28178|TSP1_BOVIN	Thrombospondin-1 OS=Bos taurus OX=9913 GN=THBS1 PE=2 SV=2
gene22521	5580	0.97	0.71	0.55	6.83	14.61	7.51	4.31849	1.02502e-14	1.2199e-12	LOC104938806	XP_027140046.1	sodium-dependent multivitamin transporter [Larimichthys crocea]	-	-	K14386	SLC5A6,SMVT	http://www.genome.jp/dbget-bin/www_bget?ko:K14386	Vitamin digestion and absorption	ko04977	KOG2349	Na+:iodide/myo-inositol/multivitamin symporters	sp|O70247|SC5A6_RAT	Sodium-dependent multivitamin transporter OS=Rattus norvegicus OX=10116 GN=Slc5a6 PE=1 SV=1
gene1097	2889	7.37	8.45	4.31	38.29	43.36	285.59	4.30346	4.7339e-14	4.80685e-12	mmp9	XP_010738886.1	matrix metalloproteinase-9 [Larimichthys crocea]	GO:0050900;GO:0004222;GO:0005576;GO:0001503;GO:0008270;GO:0031012;GO:0030574	leukocyte migration;metalloendopeptidase activity;extracellular region;ossification;zinc ion binding;extracellular matrix;collagen catabolic process	K01403	MMP9	http://www.genome.jp/dbget-bin/www_bget?ko:K01403	TNF signaling pathway;MicroRNAs in cancer;Pathways in cancer;Proteoglycans in cancer;Transcriptional misregulation in cancer;Bladder cancer;Prostate cancer;Diabetic cardiomyopathy;Fluid shear stress and atherosclerosis;Lipid and atherosclerosis;Endocrine resistance;Hepatitis B;Estrogen signaling pathway;Relaxin signaling pathway;IL-17 signaling pathway;Leukocyte transendothelial migration	ko04668,ko05206,ko05200,ko05205,ko05202,ko05219,ko05215,ko05415,ko05418,ko05417,ko01522,ko05161,ko04915,ko04926,ko04657,ko04670	-	-	sp|P14780|MMP9_HUMAN	Matrix metalloproteinase-9 OS=Homo sapiens OX=9606 GN=MMP9 PE=1 SV=3
gene13467	2604	0.05	0	0.03	0.09	0.72	0.12	4.29876	0.00311064	0.0164607	LOC104929165	XP_010741914.3	potassium voltage-gated channel subfamily KQT member 2 isoform X5 [Larimichthys crocea]	GO:0005249;GO:0008076;GO:0034765	voltage-gated potassium channel activity;voltage-gated potassium channel complex;regulation of ion transmembrane transport	K04927	KCNQ2,KV7.2	http://www.genome.jp/dbget-bin/www_bget?ko:K04927	Cholinergic synapse	ko04725	-	-	sp|O88943|KCNQ2_RAT	Potassium voltage-gated channel subfamily KQT member 2 OS=Rattus norvegicus OX=10116 GN=Kcnq2 PE=1 SV=1
gene16744	1432	109.77	90.48	53.01	2210.63	400.52	996.2	4.29509	1.40489e-13	1.30366e-11	LOC104932682	TMS03279.1	Cathepsin L1 [Larimichthys crocea]	GO:0008234	cysteine-type peptidase activity	K01365	CTSL	http://www.genome.jp/dbget-bin/www_bget?ko:K01365	Apoptosis;Autophagy - animal;Lysosome;Phagosome;Proteoglycans in cancer;Fluid shear stress and atherosclerosis;Rheumatoid arthritis;Antigen processing and presentation	ko04210,ko04140,ko04142,ko04145,ko05205,ko05418,ko05323,ko04612	KOG1543	Cysteine proteinase Cathepsin L	sp|P25975|CATL1_BOVIN	Procathepsin L OS=Bos taurus OX=9913 GN=CTSL PE=1 SV=3
gene20629	1551	0.2	0.09	0.11	3.54	0.04	2.41	4.29395	0.000158931	0.00138232	f2	NP_001290266.1	prothrombin precursor [Larimichthys crocea]	GO:0004252;GO:0005509;GO:0007596;GO:0005615;GO:0006953	serine-type endopeptidase activity;calcium ion binding;blood coagulation;extracellular space;acute-phase response	K01313	F2	http://www.genome.jp/dbget-bin/www_bget?ko:K01313	Regulation of actin cytoskeleton;Phospholipase D signaling pathway;Neuroactive ligand-receptor interaction;Pathways in cancer;Pathogenic Escherichia coli infection;Coronavirus disease - COVID-19;Complement and coagulation cascades;Platelet activation	ko04810,ko04072,ko04080,ko05200,ko05130,ko05171,ko04610,ko04611	-	-	sp|Q19AZ8|THRB_PIG	Prothrombin OS=Sus scrofa OX=9823 GN=F2 PE=2 SV=1
novel.21878	344	1.62	2.15	0	26.95	9.84	13.5	4.26737	4.52385e-05	0.000478782	-	-	-	-	-	-	-	-	-	-	-	-	-	-
novel.1931	225	97.86	0	0	274.41	343.44	707.74	4.25891	2.3005e-05	0.000272192	-	-	-	-	-	-	-	-	-	-	-	-	-	-
gene17534	1147	1.63	0.43	2.21	10.31	7.8	59.65	4.23992	2.30371e-09	8.51892e-08	LOC104933502	KAE8295055.1	Regulator of G-protein signaling 5 [Larimichthys crocea]	-	-	K16449	RGS	http://www.genome.jp/dbget-bin/www_bget?ko:K16449	-	-	-	-	sp|Q864Z2|RGS5_PIG	Regulator of G-protein signaling 5 OS=Sus scrofa OX=9823 GN=RGS5 PE=2 SV=1
gene16446	901	30.59	11.81	44.95	291.04	170.92	1063.67	4.22524	2.55113e-12	1.81108e-10	hspb6	XP_018543117.1;XP_010745862.1;XP_018543125.1	PREDICTED: heat shock protein beta-6 isoform X1 [Lates calcarifer];heat shock protein beta-6 isoform X1 [Larimichthys crocea];PREDICTED: heat shock protein beta-6 isoform X2 [Lates calcarifer]	-	-	K09541	CRYAA	http://www.genome.jp/dbget-bin/www_bget?ko:K09541	Protein processing in endoplasmic reticulum	ko04141	-	-	sp|Q05557|CRYAB_ANAPL	Alpha-crystallin B chain OS=Anas platyrhynchos OX=8839 GN=CRYAB PE=2 SV=1
gene13363	2115	7.4	15.22	31.21	318.1	211.14	124.82	4.21999	4.97151e-11	2.63756e-09	LOC104929064	XP_019132265.2;KAE8298693.1	calcium-binding and coiled-coil domain-containing protein 1-like isoform X3 [Larimichthys crocea];Calcium-binding and coiled-coil domain-containing protein 1 [Larimichthys crocea]	GO:0006284;GO:0017065	base-excision repair;single-strand selective uracil DNA N-glycosylase activity	-	-	-	-	-	-	-	sp|A2BGD5|CACO1_DANRE	Calcium-binding and coiled-coil domain-containing protein 1 OS=Danio rerio OX=7955 GN=calcoco1 PE=3 SV=1
gene4187	1459	1.25	1.45	2.8	11.48	28.23	39.12	4.21127	5.75103e-14	5.74546e-12	LOC104919169	XP_010729402.2	ubiquitin carboxyl-terminal hydrolase 2 [Larimichthys crocea]	GO:0016579;GO:0006511;GO:0004843	protein deubiquitination;ubiquitin-dependent protein catabolic process;thiol-dependent deubiquitinase	K11833	USP2	http://www.genome.jp/dbget-bin/www_bget?ko:K11833	-	-	KOG1868	Ubiquitin C-terminal hydrolase	sp|O88623|UBP2_MOUSE	Ubiquitin carboxyl-terminal hydrolase 2 OS=Mus musculus OX=10090 GN=Usp2 PE=1 SV=2
novel.13829	667	0.45	0	0.17	1.68	0	9.85	4.20255	0.00571384	0.0268525	-	-	-	-	-	-	-	-	-	-	-	-	-	-
gene3106	1755	0.04	0	0.05	0.87	0.04	0.23	4.18599	0.0106605	0.0444125	LOC104918006	TMS07794.1	Transmembrane protease serine 13, partial [Larimichthys crocea]	GO:0099106;GO:0006811;GO:0043269;GO:0016021	ion channel regulator activity;ion transport;regulation of ion transport;integral component of membrane	K13363	FXYD6	http://www.genome.jp/dbget-bin/www_bget?ko:K13363	-	-	-	-	sp|Q3MHZ5|FXYD6_BOVIN	FXYD domain-containing ion transport regulator 6 OS=Bos taurus OX=9913 GN=FXYD6 PE=3 SV=1
gene20685	1051	23	46.13	35.31	592.64	62.59	1028.21	4.18396	1.8427e-10	8.81364e-09	LOC104936857	XP_010751256.1	heat shock protein beta-11 [Larimichthys crocea]	-	-	-	-	-	-	-	-	-	sp|A5JV83|HSPBB_DANRE	Heat shock protein beta-11 OS=Danio rerio OX=7955 GN=hspb11 PE=2 SV=2
novel.5612	556	0.21	0.38	0	1.25	0.19	9.36	4.18386	0.00485141	0.0235903	-	-	-	-	-	-	-	-	-	-	-	-	-	-
gene12055	654	0.31	0	0	0.4	0.83	3.78	4.18096	0.00873479	0.0378197	iqcj	XP_027136091.1	IQCJ-SCHIP1 readthrough transcript protein isoform X2 [Larimichthys crocea]	-	-	K24832	IQCJ	http://www.genome.jp/dbget-bin/www_bget?ko:K24832	-	-	-	-	sp|Q8BPW0|IQCJ_MOUSE	IQ domain-containing protein J OS=Mus musculus OX=10090 GN=Iqcj PE=4 SV=1
gene17482	837	0.42	0.19	0	2.18	0.56	7.3	4.16103	0.000101908	0.000952773	LOC104933446	-	-	-	-	-	-	-	-	-	-	-	-	-
gene18129	5356	0	0.02	0	0.04	0.11	0.14	4.15993	0.00761153	0.0338768	LOC104934141	XP_019129347.1	FERM and PDZ domain-containing protein 1 [Larimichthys crocea]	GO:0005856;GO:0007165	cytoskeleton;signal transduction	K23954	FRMPD1	http://www.genome.jp/dbget-bin/www_bget?ko:K23954	-	-	KOG3552	FERM domain protein FRM-8	sp|A2AKB4|FRPD1_MOUSE	FERM and PDZ domain-containing protein 1 OS=Mus musculus OX=10090 GN=Frmpd1 PE=1 SV=1
gene21197	3351	1.21	4.54	2.4	11.84	32.98	74.16	4.15922	7.14129e-12	4.6439e-10	LOC104937404	XP_010751927.2	laminin subunit gamma-2 [Larimichthys crocea]	GO:0016020;GO:0005604	membrane;basement membrane	K06246	LAMC2	http://www.genome.jp/dbget-bin/www_bget?ko:K06246	Focal adhesion;PI3K-Akt signaling pathway;ECM-receptor interaction;Pathways in cancer;Small cell lung cancer;Amoebiasis;Toxoplasmosis;Human papillomavirus infection	ko04510,ko04151,ko04512,ko05200,ko05222,ko05146,ko05145,ko05165	KOG1836	Extracellular matrix glycoprotein Laminin subunits alpha and gamma	sp|Q8HZI9|LAMC2_HORSE	Laminin subunit gamma-2 OS=Equus caballus OX=9796 GN=LAMC2 PE=2 SV=1
gene9253	1661	0.26	0.04	0.05	0.41	2.83	0.16	4.14299	0.000920628	0.00603106	LOC104924659	XP_010736376.3	zona pellucida sperm-binding protein 3 [Larimichthys crocea]	GO:0008643;GO:0016021;GO:0015293	carbohydrate transport;integral component of membrane;symporter activity	-	-	-	-	-	-	-	sp|P79762|ZP3_CHICK	Zona pellucida sperm-binding protein 3 OS=Gallus gallus OX=9031 GN=ZP3 PE=1 SV=4
novel.20743	881	0.1	0.35	0	0.08	3.79	0.73	4.12387	0.00492201	0.0238721	-	TKS80470.1	DNA-directed RNA polymerase II subunit RPB4 [Collichthys lucidus]	GO:0030880;GO:0000166;GO:0016021;GO:0004984;GO:0005634;GO:0007186;GO:0003899;GO:0006352	RNA polymerase complex;nucleotide binding;integral component of membrane;olfactory receptor activity;nucleus;G protein-coupled receptor signaling pathway;DNA-directed 5'-3' RNA polymerase activity;DNA-templated transcription, initiation	-	-	-	-	-	-	-	-	-
gene2892	2033	1.52	0.57	0.59	6.99	3.22	33.64	4.11313	3.06563e-10	1.40656e-08	fgf1	XP_010727620.2;XP_010727619.2;KAE8287582.1	fibroblast growth factor 1 isoform X2 [Larimichthys crocea];fibroblast growth factor 1 isoform X1 [Larimichthys crocea];putative fibroblast growth factor 1 [Larimichthys crocea]	GO:0030154;GO:0005634;GO:0005104;GO:0005576;GO:0005829;GO:0001525;GO:0051781;GO:0005938;GO:0008083;GO:0008201;GO:0008543	cell differentiation;nucleus;fibroblast growth factor receptor binding;extracellular region;cytosol;angiogenesis;positive regulation of cell division;cell cortex;growth factor activity;heparin binding;fibroblast growth factor receptor signaling pathway	K18496	FGF1	http://www.genome.jp/dbget-bin/www_bget?ko:K18496	Regulation of actin cytoskeleton;Calcium signaling pathway;Hippo signaling pathway;MAPK signaling pathway;PI3K-Akt signaling pathway;Rap1 signaling pathway;Ras signaling pathway;Pathways in cancer;Breast cancer;Gastric cancer;Melanoma	ko04810,ko04020,ko04390,ko04010,ko04151,ko04015,ko04014,ko05200,ko05224,ko05226,ko05218	-	-	sp|Q6PBT8|FGF1_DANRE	Putative fibroblast growth factor 1 OS=Danio rerio OX=7955 GN=fgf1 PE=2 SV=1
gene2828	2554	8.5	9.62	9.67	137.82	87.99	127.13	4.09889	1.79539e-30	1.39008e-27	usp14	XP_010727521.2	ubiquitin carboxyl-terminal hydrolase 14 [Larimichthys crocea]	GO:0043161;GO:0016579;GO:0004843;GO:0000502	proteasome-mediated ubiquitin-dependent protein catabolic process;protein deubiquitination;thiol-dependent deubiquitinase;proteasome complex	K11843	USP14,UBP6	http://www.genome.jp/dbget-bin/www_bget?ko:K11843	-	-	KOG1872	Ubiquitin-specific protease	sp|P60051|UBP14_PANTR	Ubiquitin carboxyl-terminal hydrolase 14 OS=Pan troglodytes OX=9598 GN=USP14 PE=3 SV=2
gene18386	6684	0.1	0	0.07	0.12	0.18	2.84	4.08337	0.000215969	0.00178719	LOC104934426	XP_019128412.1	clustered mitochondria protein homolog [Larimichthys crocea]	GO:0048312;GO:0003723;GO:0005737	intracellular distribution of mitochondria;RNA binding;cytoplasm	K03255	TIF31,CLU1	http://www.genome.jp/dbget-bin/www_bget?ko:K03255	-	-	KOG1839	Uncharacterized protein CLU1/cluA/TIF31 involved in mitochondrial morphology/distribution, also found associated with eIF-3	sp|A0JMD0|CLU_DANRE	Clustered mitochondria protein homolog OS=Danio rerio OX=7955 GN=cluh PE=2 SV=1
gene13680	1312	0.8	0.22	0.42	10.12	3.68	2.26	4.08249	2.48058e-07	5.47761e-06	LOC104929416	XP_010742235.1	alpha-tectorin [Larimichthys crocea]	GO:0016021	integral component of membrane	-	-	-	-	-	-	-	sp|O08523|TECTA_MOUSE	Alpha-tectorin OS=Mus musculus OX=10090 GN=Tecta PE=1 SV=2
gene3903	2498	0.22	0.33	0.19	3.06	0.95	3.15	4.04387	2.4942e-11	1.43047e-09	LOC104918881	XP_027144987.1;TMS22717.1	chromobox protein homolog 7 isoform X2 [Larimichthys crocea];Chromobox protein-like protein 7 [Larimichthys crocea]	GO:0035102	PRC1 complex	K11454	CBX7	http://www.genome.jp/dbget-bin/www_bget?ko:K11454	-	-	KOG1911	Heterochromatin-associated protein HP1 and related CHROMO domain proteins	sp|O95931|CBX7_HUMAN	Chromobox protein homolog 7 OS=Homo sapiens OX=9606 GN=CBX7 PE=1 SV=1
gene2668	1896	0.07	0.07	0.09	0.13	1.29	1.21	4.02933	0.000198797	0.00166286	LOC104940671	XP_019116436.2	poly [ADP-ribose] polymerase 6 [Larimichthys crocea]	GO:0003950	NAD+ ADP-ribosyltransferase activity	K15258	PARP6_8	http://www.genome.jp/dbget-bin/www_bget?ko:K15258	-	-	-	-	sp|Q5RDU4|PARP6_PONAB	Protein mono-ADP-ribosyltransferase PARP6 OS=Pongo abelii OX=9601 GN=PARP6 PE=2 SV=1
novel.12404	343	1.18	0.52	0.89	5.81	3.3	14.75	4.02297	0.00583729	0.0273484	-	-	-	-	-	-	-	-	-	-	-	-	-	-
gene17875	1534	2.31	2.99	1.86	31.3	13.5	49.84	4.02282	9.71453e-24	4.45717e-21	msmo1	KAE8300346.1	Methylsterol monooxygenase 1 [Larimichthys crocea]	GO:0016021;GO:0016491;GO:0008610;GO:0005506;GO:0004497	integral component of membrane;oxidoreductase activity;lipid biosynthetic process;iron ion binding;monooxygenase activity	K07750	MESO1,ERG25	http://www.genome.jp/dbget-bin/www_bget?ko:K07750	Steroid biosynthesis	ko00100	KOG0873	C-4 sterol methyl oxidase	sp|Q7ZW77|MSMO1_DANRE	Methylsterol monooxygenase 1 OS=Danio rerio OX=7955 GN=msmo1 PE=2 SV=1
novel.5621	471	19.09	13.86	2.77	54.47	44.81	423.86	4.00516	5.28649e-08	1.38455e-06	-	-	-	-	-	-	-	-	-	-	-	-	-	-
gene19386	3628	0.05	0.05	0.02	0.56	0.11	1.04	4.0026	2.08889e-05	0.000251357	agbl2	XP_019118627.2	cytosolic carboxypeptidase 2 [Larimichthys crocea]	GO:0008270;GO:0004181;GO:0005829	zinc ion binding;metallocarboxypeptidase activity;cytosol	K23437	AGBL2_3,CCP2_3	http://www.genome.jp/dbget-bin/www_bget?ko:K23437	-	-	KOG3641	Zinc carboxypeptidase	sp|A6H8T7|CBPC2_DANRE	Cytosolic carboxypeptidase 2 OS=Danio rerio OX=7955 GN=zte25 PE=2 SV=1
gene17448	2443	0.66	0.27	0.13	3.44	2.01	8.77	4.00083	1.91434e-11	1.14014e-09	LOC104933420	TMS11344.1	Free fatty acid receptor 2 [Larimichthys crocea]	GO:0004930;GO:0016021	G protein-coupled receptor activity;integral component of membrane	K04328	FFAR2,GPR43	http://www.genome.jp/dbget-bin/www_bget?ko:K04328	cAMP signaling pathway	ko04024	-	-	sp|Q76EI6|FFAR2_RAT	Free fatty acid receptor 2 OS=Rattus norvegicus OX=10116 GN=Ffar2 PE=1 SV=1
gene14551	1367	1.58	1.67	2.28	12.88	29.65	32.83	3.98536	7.58002e-17	1.40151e-14	LOC104930318	XP_019110580.2;XP_019110592.2	collagenase 3 [Larimichthys crocea];collagenase 3 [Larimichthys crocea]	GO:0008270;GO:0031012;GO:0004222	zinc ion binding;extracellular matrix;metalloendopeptidase activity	K07994	MMP13	http://www.genome.jp/dbget-bin/www_bget?ko:K07994	Parathyroid hormone synthesis, secretion and action;Relaxin signaling pathway;IL-17 signaling pathway	ko04928,ko04926,ko04657	-	-	sp|O62806|MMP13_RABIT	Collagenase 3 OS=Oryctolagus cuniculus OX=9986 GN=MMP13 PE=2 SV=1
novel.9613	2000	0	0.09	0.12	1.05	0.73	0.55	3.97906	7.17484e-05	0.000711625	-	-	-	-	-	-	-	-	-	-	-	-	-	-
gene11789	1279	0.06	0.11	0.21	0.87	1.98	0.94	3.96092	8.24047e-05	0.000796079	LOC104927377	XP_027140415.1	protein stum homolog [Larimichthys crocea]	-	-	-	-	-	-	-	-	-	sp|Q0VBF8|STUM_MOUSE	Protein stum homolog OS=Mus musculus OX=10090 GN=Stum PE=1 SV=1
novel.17754	1678	0.3	0	0.15	1.73	0.15	4.5	3.95414	0.000305085	0.00239127	-	TKS73097.1	hypothetical protein D9C73_007175 [Collichthys lucidus]	-	-	-	-	-	-	-	-	-	-	-
gene134	1517	39.63	9.08	73.7	396.74	493.72	555.21	3.95312	3.34707e-09	1.2001e-07	ddit4	XP_010741201.1	DNA damage-inducible transcript 4 protein [Larimichthys crocea]	GO:0005737;GO:0009968;GO:0009953	cytoplasm;negative regulation of signal transduction;dorsal/ventral pattern formation	K08270	DDIT4,REDD1	http://www.genome.jp/dbget-bin/www_bget?ko:K08270	Autophagy - animal;PI3K-Akt signaling pathway;mTOR signaling pathway;MicroRNAs in cancer	ko04140,ko04151,ko04150,ko05206	-	-	sp|Q7T346|DDIT4_DANRE	DNA damage-inducible transcript 4 protein OS=Danio rerio OX=7955 GN=ddit4 PE=2 SV=1
novel.13878	3836	0.05	0.14	0.02	0.17	0.65	1.89	3.94756	1.04434e-05	0.000138145	-	XP_027132060.1	uncharacterized protein LOC113744960 [Larimichthys crocea]	-	-	-	-	-	-	-	-	-	-	-
gene9752	1891	1.08	0.46	1.74	2.16	4.06	41.9	3.9286	2.42152e-06	3.9575e-05	tmem88	KAA8582523.1	hypothetical protein FQN60_006194 [Etheostoma spectabile]	GO:0090090;GO:0016021	negative regulation of canonical Wnt signaling pathway;integral component of membrane	-	-	-	-	-	-	-	sp|Q6PEY1|TMM88_HUMAN	Transmembrane protein 88 OS=Homo sapiens OX=9606 GN=TMEM88 PE=1 SV=1
gene23208	1047	0.23	0.7	0.27	6.98	2.3	4.04	3.92518	8.41685e-08	2.10855e-06	LOC104939533	XP_010754385.1	complement C1q-like protein 3 [Larimichthys crocea]	-	-	K23284	C1QL	http://www.genome.jp/dbget-bin/www_bget?ko:K23284	-	-	-	-	sp|Q5VWW1|C1QL3_HUMAN	Complement C1q-like protein 3 OS=Homo sapiens OX=9606 GN=C1QL3 PE=2 SV=1
gene5444	2959	2.97	1.58	1.87	20.14	14.07	44.98	3.905	3.30751e-23	1.46334e-20	cers2	KAE8288855.1	Ceramide synthase 2 [Larimichthys crocea]	GO:0006665;GO:0003677;GO:0016021;GO:0005789;GO:0106097;GO:0016740;GO:0007275;GO:0005634	sphingolipid metabolic process;DNA binding;integral component of membrane;endoplasmic reticulum membrane;cellular response to ceramide;transferase activity;multicellular organism development;nucleus	K24621;K04710	CERS2_4,LASS2_4;CERS1,LASS1	http://www.genome.jp/dbget-bin/www_bget?ko:K24621;http://www.genome.jp/dbget-bin/www_bget?ko:K04710	Sphingolipid signaling pathway;Sphingolipid metabolism	ko04071,ko00600	KOG1607	Protein transporter of the TRAM (translocating chain-associating membrane) superfamily	sp|Q3ZBF8|CERS2_BOVIN	Ceramide synthase 2 OS=Bos taurus OX=9913 GN=CERS2 PE=2 SV=1
novel.18301	970	0	0.26	0.19	1.85	1.05	0.63	3.90279	0.00154222	0.00925628	-	-	-	-	-	-	-	-	-	-	-	-	-	-
gene11823	1562	0.92	0.25	0.21	0.8	3.01	15.14	3.89893	5.3178e-06	7.72297e-05	LOC104927431	KAE8291245.1	Myocilin Myocilin 55 kDa subunit Trabecular meshwork-induced glucocorticoid response protein [Larimichthys crocea]	GO:0005791;GO:0005615;GO:0001952;GO:0030335;GO:0005929;GO:0005741;GO:0051492	rough endoplasmic reticulum;extracellular space;regulation of cell-matrix adhesion;positive regulation of cell migration;cilium;mitochondrial outer membrane;regulation of stress fiber assembly	K23027	MYOC	http://www.genome.jp/dbget-bin/www_bget?ko:K23027	-	-	-	-	sp|Q594P2|MYOC_FELCA	Myocilin OS=Felis catus OX=9685 GN=MYOC PE=2 SV=1
gene19947	2292	10.11	12.87	19.24	155.9	113.81	227.73	3.8946	8.7294e-23	3.60466e-20	dusp1	XP_010750375.1	dual specificity protein phosphatase 1 [Larimichthys crocea]	GO:0017017;GO:0005634;GO:0106306;GO:0004725;GO:0106307	MAP kinase tyrosine/serine/threonine phosphatase activity;nucleus;protein serine phosphatase activity;protein tyrosine phosphatase activity;protein threonine phosphatase activity	K21278	DUSP1	http://www.genome.jp/dbget-bin/www_bget?ko:K21278	MAPK signaling pathway;Fluid shear stress and atherosclerosis;Parkinson disease;Serotonergic synapse	ko04010,ko05418,ko05012,ko04726	-	-	sp|P28562|DUS1_HUMAN	Dual specificity protein phosphatase 1 OS=Homo sapiens OX=9606 GN=DUSP1 PE=1 SV=3
novel.12384	901	0.19	0.26	0.11	0.25	0.42	7.81	3.8896	0.00164292	0.00975977	Il17c	KAE8296025.1	hypothetical protein D5F01_LYC04775 [Larimichthys crocea]	GO:0006954;GO:0005576;GO:0005615;GO:0005125	inflammatory response;extracellular region;extracellular space;cytokine activity	K05494	IL17F,ML1	http://www.genome.jp/dbget-bin/www_bget?ko:K05494	Cytokine-cytokine receptor interaction;Inflammatory bowel disease;IL-17 signaling pathway;Th17 cell differentiation	ko04060,ko05321,ko04657,ko04659	-	-	sp|Q8K4C5|IL17C_MOUSE	Interleukin-17C OS=Mus musculus OX=10090 GN=Il17c PE=1 SV=1
gene19116	1774	0	0.11	0.09	0.28	0.17	2.46	3.88019	0.00144685	0.00878822	LOC104935211	XP_010749321.3	high affinity choline transporter 1 [Larimichthys crocea]	GO:0022857;GO:0016021	transmembrane transporter activity;integral component of membrane	K14387	SLC5A7,CHT1	http://www.genome.jp/dbget-bin/www_bget?ko:K14387	Choline metabolism in cancer;Cholinergic synapse	ko05231,ko04725	-	-	sp|Q9GZV3|SC5A7_HUMAN	High affinity choline transporter 1 OS=Homo sapiens OX=9606 GN=SLC5A7 PE=1 SV=1
gene12460	1754	0.32	0.18	0.42	4.53	1.34	4.95	3.87991	8.04994e-10	3.35766e-08	LOC104928116	XP_019112341.2	B-cell receptor CD22-like isoform X1 [Larimichthys crocea]	GO:0016021;GO:0005886	integral component of membrane;plasma membrane	K06467	CD22,SIGLEC2	http://www.genome.jp/dbget-bin/www_bget?ko:K06467	Cell adhesion molecules;B cell receptor signaling pathway;Hematopoietic cell lineage	ko04514,ko04662,ko04640	-	-	sp|P35329|CD22_MOUSE	B-cell receptor CD22 OS=Mus musculus OX=10090 GN=Cd22 PE=1 SV=1
gene12449	644	0.44	8.39	2.75	73.98	14.69	25.53	3.85701	1.16973e-05	0.000152123	LOC104928110	XP_019115808.1	telethonin [Larimichthys crocea]	-	-	K19879	TCAP	http://www.genome.jp/dbget-bin/www_bget?ko:K19879	-	-	-	-	sp|O15273|TELT_HUMAN	Telethonin OS=Homo sapiens OX=9606 GN=TCAP PE=1 SV=1
gene15481	4443	2.32	6.1	12.87	36.21	85.02	142.87	3.85675	3.47755e-09	1.23615e-07	LOC104931323	XP_010744611.1;XP_010744613.1	peptidyl-prolyl cis-trans isomerase FKBP5 isoform X1 [Larimichthys crocea];peptidyl-prolyl cis-trans isomerase FKBP5 isoform X2 [Larimichthys crocea]	GO:0003755	peptidyl-prolyl cis-trans isomerase activity	K09571	FKBP4_5	http://www.genome.jp/dbget-bin/www_bget?ko:K09571	Estrogen signaling pathway	ko04915	KOG0543	FKBP-type peptidyl-prolyl cis-trans isomerase	sp|Q13451|FKBP5_HUMAN	Peptidyl-prolyl cis-trans isomerase FKBP5 OS=Homo sapiens OX=9606 GN=FKBP5 PE=1 SV=2
gene3121	1398	0.16	0.19	0.98	6.51	5.36	0.75	3.85353	7.67673e-05	0.000750686	LOC104918043	XP_027136582.1	zona pellucida-like domain-containing protein 1 [Larimichthys crocea]	GO:0016021	integral component of membrane	-	-	-	-	-	-	-	sp|Q66IR0|ZPLD1_XENLA	Zona pellucida-like domain-containing protein 1 OS=Xenopus laevis OX=8355 GN=zpld1 PE=2 SV=1
gene4889	1585	23.08	12.21	21.59	216.31	85.88	395.68	3.84389	2.88545e-17	5.81218e-15	LOC104919929	XP_010730359.2	CCAAT/enhancer-binding protein beta [Larimichthys crocea]	GO:0003700	DNA-binding transcription factor activity	K10048	CEBPB	http://www.genome.jp/dbget-bin/www_bget?ko:K10048	TNF signaling pathway;Transcriptional misregulation in cancer;Tuberculosis;IL-17 signaling pathway	ko04668,ko05202,ko05152,ko04657	-	-	sp|P21272|CEBPB_RAT	CCAAT/enhancer-binding protein beta OS=Rattus norvegicus OX=10116 GN=Cebpb PE=1 SV=1
gene18907	1791	0.16	0.04	0	1.29	0.24	0.48	3.83862	0.00128482	0.00797011	LOC104934979	XP_027139542.1	piggyBac transposable element-derived protein 2-like [Larimichthys crocea]	GO:0016021	integral component of membrane	-	-	-	-	-	-	-	sp|Q6P3X8|PGBD2_HUMAN	PiggyBac transposable element-derived protein 2 OS=Homo sapiens OX=9606 GN=PGBD2 PE=2 SV=1
gene22951	2011	11.97	7.3	31.16	41.31	133.9	506.06	3.83686	1.63258e-07	3.77321e-06	ankrd1	KAE8280946.1	Ankyrin repeat domain-containing protein 1 Cardiac ankyrin repeat protein [Larimichthys crocea]	-	-	K21433	ANKRD1	http://www.genome.jp/dbget-bin/www_bget?ko:K21433	-	-	-	-	sp|Q15327|ANKR1_HUMAN	Ankyrin repeat domain-containing protein 1 OS=Homo sapiens OX=9606 GN=ANKRD1 PE=1 SV=2
gene10980	566	12.31	4.25	4.15	37.37	36.8	208.26	3.79094	5.82482e-10	2.5186e-08	LOC104926506	TKS81703.1;AGN62118.1	Hepcidin Precursor [Collichthys lucidus];hepcidin isoform 2 [Larimichthys crocea]	GO:0050829;GO:0005179;GO:0005576;GO:0006879;GO:0042742;GO:0050832;GO:0050830	defense response to Gram-negative bacterium;hormone activity;extracellular region;cellular iron ion homeostasis;defense response to bacterium;defense response to fungus;defense response to Gram-positive bacterium	K23106	HAMP	http://www.genome.jp/dbget-bin/www_bget?ko:K23106	TGF-beta signaling pathway	ko04350	-	-	sp|A1Z0M0|HEPC_LARCR	Hepcidin OS=Larimichthys crocea OX=215358 GN=hamp PE=1 SV=2
gene4623	2051	0.13	0.06	0.16	0.35	0.56	3.62	3.78674	3.72946e-05	0.000408673	LOC104919641	XP_010730007.1	rho-related GTP-binding protein Rho6 [Larimichthys crocea]	GO:0003924;GO:0007264;GO:0005525	GTPase activity;small GTPase mediated signal transduction;GTP binding	K07531	RND1	http://www.genome.jp/dbget-bin/www_bget?ko:K07531	Axon guidance	ko04360	KOG0393	Ras-related small GTPase, Rho type	sp|Q92730|RND1_HUMAN	Rho-related GTP-binding protein Rho6 OS=Homo sapiens OX=9606 GN=RND1 PE=1 SV=1
novel.17613	2792	0.33	0.17	0.3	0.64	5.07	0.78	3.77819	3.80482e-05	0.000414518	-	-	-	-	-	-	-	-	-	-	-	-	-	-
gene6914	2459	0.33	0.42	0.41	4.97	0.89	7.79	3.77654	1.78524e-09	6.79433e-08	cpsf3	KAE8289953.1	Cleavage and polyadenylation specificity factor subunit 3 [Larimichthys crocea]	GO:0005634;GO:0006397	nucleus;mRNA processing	K14403	CPSF3,YSH1	http://www.genome.jp/dbget-bin/www_bget?ko:K14403	mRNA surveillance pathway	ko03015	KOG1137	mRNA cleavage and polyadenylation factor II complex, BRR5 (CPSF subunit)	sp|P79101|CPSF3_BOVIN	Cleavage and polyadenylation specificity factor subunit 3 OS=Bos taurus OX=9913 GN=CPSF3 PE=1 SV=1
gene5764	1928	2.4	3.15	4.38	13.45	19.69	92.48	3.77436	2.79439e-11	1.58068e-09	serpine2	XP_027136710.1	glia-derived nexin [Larimichthys crocea]	GO:0008233;GO:0005615	peptidase activity;extracellular space	K16643	SERPINE2	http://www.genome.jp/dbget-bin/www_bget?ko:K16643	-	-	-	-	sp|P07092|GDN_RAT	Glia-derived nexin OS=Rattus norvegicus OX=10116 GN=Serpine2 PE=1 SV=1
gene4884	630	1	1.51	0.39	10.41	8.37	9.31	3.76469	7.15076e-09	2.37172e-07	srxn1	XP_019132099.1	sulfiredoxin-1 [Larimichthys crocea]	GO:0005524;GO:0032542	ATP binding;sulfiredoxin activity	K12260	SRX1	http://www.genome.jp/dbget-bin/www_bget?ko:K12260	-	-	-	-	sp|Q9BYN0|SRXN1_HUMAN	Sulfiredoxin-1 OS=Homo sapiens OX=9606 GN=SRXN1 PE=1 SV=2
gene5681	844	0.52	0.19	0.48	5.48	2.94	2.83	3.75936	2.406e-06	3.93733e-05	LOC104920805	KAE8291823.1	Sepiapterin reductase [Larimichthys crocea]	GO:0016021;GO:0006729;GO:0004757	integral component of membrane;tetrahydrobiopterin biosynthetic process;sepiapterin reductase activity	K00072	SPR	http://www.genome.jp/dbget-bin/www_bget?ko:K00072	Folate biosynthesis	ko00790	KOG1205	Predicted dehydrogenase	sp|Q7ZY31|SPRE_XENLA	Sepiapterin reductase OS=Xenopus laevis OX=8355 GN=spr PE=2 SV=1
gene10538	2632	8.74	5.11	14.74	138.26	79.87	53.49	3.75133	8.28884e-10	3.44571e-08	klhl30	KAE8294408.1;XP_010738106.3	Kelch-like protein 30 [Larimichthys crocea];kelch-like protein 30 [Larimichthys crocea]	-	-	K10466	KLHL30	http://www.genome.jp/dbget-bin/www_bget?ko:K10466	-	-	-	-	sp|Q6INL2|KLH30_XENLA;sp|Q0D2K2|KLH30_HUMAN	Kelch-like protein 30 OS=Xenopus laevis OX=8355 GN=klhl30 PE=2 SV=1;Kelch-like protein 30 OS=Homo sapiens OX=9606 GN=KLHL30 PE=2 SV=3
novel.19077	490	0.55	0.99	0.63	6.96	6.53	7.59	3.75021	4.21028e-06	6.32206e-05	-	-	-	-	-	-	-	-	-	-	-	-	-	-
gene2074	2795	5.85	7.8	6.21	82.08	43.32	72.2	3.74339	4.84924e-24	2.50302e-21	plaa	XP_010752193.3;XP_010752184.3	phospholipase A-2-activating protein isoform X2 [Larimichthys crocea];phospholipase A-2-activating protein isoform X1 [Larimichthys crocea]	GO:0005737	cytoplasm	K14018	PLAA,DOA1,UFD3	http://www.genome.jp/dbget-bin/www_bget?ko:K14018	Protein processing in endoplasmic reticulum	ko04141	KOG0301	Phospholipase A2-activating protein (contains WD40 repeats)	sp|Q9Y263|PLAP_HUMAN	Phospholipase A-2-activating protein OS=Homo sapiens OX=9606 GN=PLAA PE=1 SV=2
gene11488	3052	2.13	3.81	5.47	46.5	27.97	38.93	3.72293	1.9292e-14	2.10563e-12	LOC104927043	XP_010739332.1	prolyl endopeptidase [Larimichthys crocea]	GO:0004252	serine-type endopeptidase activity	K01322	PREP	http://www.genome.jp/dbget-bin/www_bget?ko:K01322	Renin-angiotensin system	ko04614	-	-	sp|Q9QUR6|PPCE_MOUSE	Prolyl endopeptidase OS=Mus musculus OX=10090 GN=Prep PE=1 SV=1
novel.9876	3029	0.09	0.08	0.05	0.68	0.25	1.5	3.71536	3.06177e-06	4.86584e-05	VWA7	XP_010739438.3	von Willebrand factor A domain-containing protein 7 [Larimichthys crocea]	-	-	K24511	VWA7	http://www.genome.jp/dbget-bin/www_bget?ko:K24511	-	-	-	-	sp|Q9Y334|VWA7_HUMAN	von Willebrand factor A domain-containing protein 7 OS=Homo sapiens OX=9606 GN=VWA7 PE=2 SV=4
gene1848	2232	0.03	0.03	0.04	0.4	0.16	0.37	3.71449	0.00266354	0.0145176	LOC104935265	XP_019127941.1	serine/threonine-protein kinase N2 isoform X1 [Larimichthys crocea]	GO:0004698;GO:0007165;GO:0005524	calcium-dependent protein kinase C activity;signal transduction;ATP binding	K23692	PKN3	http://www.genome.jp/dbget-bin/www_bget?ko:K23692	PI3K-Akt signaling pathway	ko04151	KOG0694	Serine/threonine protein kinase	sp|A7MBL8|PKN2_DANRE	Serine/threonine-protein kinase N2 OS=Danio rerio OX=7955 GN=pkn2 PE=2 SV=1
novel.17674	702	0	1.01	0.11	2.09	1.36	2.58	3.69271	0.00037363	0.00283437	-	-	-	-	-	-	-	-	-	-	-	-	-	-
gene21659	1068	5.52	10.09	2.21	44.75	16.77	131.4	3.66179	1.19309e-09	4.76776e-08	LOC104937898	XP_010752518.2;XP_019119129.1	caspase-3 isoform X1 [Larimichthys crocea];caspase-3 isoform X2 [Larimichthys crocea]	GO:0004197	cysteine-type endopeptidase activity	K04397	CASP7	http://www.genome.jp/dbget-bin/www_bget?ko:K04397	Apoptosis;Apoptosis - fly;Apoptosis - multiple species;TNF signaling pathway;Pathways in cancer;Lipid and atherosclerosis;Non-alcoholic fatty liver disease;Legionellosis;Pathogenic Escherichia coli infection;Pertussis;Salmonella infection;Alzheimer disease;Pathways of neurodegeneration - multiple diseases	ko04210,ko04214,ko04215,ko04668,ko05200,ko05417,ko04932,ko05134,ko05130,ko05133,ko05132,ko05010,ko05022	KOG3573	Caspase, apoptotic cysteine protease	sp|Q5IS99|CASP3_SAIBB	Caspase-3 OS=Saimiri boliviensis boliviensis OX=39432 GN=CASP3 PE=2 SV=1
gene16117	2089	0.39	1.27	1.03	4.78	3.81	22.56	3.65705	2.03625e-09	7.62087e-08	LOC104932003	TMS18957.1	Matrix metalloproteinase-19 [Larimichthys crocea]	GO:0004222;GO:0008270;GO:0031012	metalloendopeptidase activity;zinc ion binding;extracellular matrix	K07998	MMP19,MMP18	http://www.genome.jp/dbget-bin/www_bget?ko:K07998	-	-	-	-	sp|Q99542|MMP19_HUMAN	Matrix metalloproteinase-19 OS=Homo sapiens OX=9606 GN=MMP19 PE=1 SV=1
gene2015	2449	7.12	10.88	11.87	161.41	30.61	102.49	3.62306	1.70588e-11	1.03549e-09	klhl40	XP_010751420.3	kelch-like protein 40 [Larimichthys crocea]	GO:0031397;GO:0031674;GO:0048741	negative regulation of protein ubiquitination;I band;skeletal muscle fiber development	K10473	KBTBD5_10	http://www.genome.jp/dbget-bin/www_bget?ko:K10473	-	-	-	-	sp|E9QJ30|KL40B_DANRE;sp|Q5U504|KLH40_XENLA	Kelch-like protein 40b OS=Danio rerio OX=7955 GN=klhl40b PE=2 SV=1;Kelch-like protein 40 OS=Xenopus laevis OX=8355 GN=klhl40 PE=2 SV=1
gene741	1252	0.06	0	0.21	0.63	0.37	1.83	3.62076	0.00224695	0.0126466	cdh16	TNN80480.1	Cadherin-17 [Liparis tanakae]	GO:0005509;GO:0007156;GO:0016021;GO:0005886	calcium ion binding;homophilic cell adhesion via plasma membrane adhesion molecules;integral component of membrane;plasma membrane	K06810	CDH16	http://www.genome.jp/dbget-bin/www_bget?ko:K06810	-	-	-	-	sp|Q12864|CAD17_HUMAN	Cadherin-17 OS=Homo sapiens OX=9606 GN=CDH17 PE=1 SV=3
gene10629	1589	3.07	4.7	1.89	38.86	19.11	26.98	3.62044	1.33526e-14	1.53159e-12	LOC104926127	KAE8287803.1	hypothetical protein D5F01_LYC13860 [Larimichthys crocea]	-	-	-	-	-	-	-	-	-	-	-
gene7780	2434	0.05	0.07	0.06	0.5	0.73	0.34	3.61314	0.000167901	0.00144945	adam22	XP_027142209.1	disintegrin and metalloproteinase domain-containing protein 22 isoform X2 [Larimichthys crocea]	GO:0004222;GO:0016021	metalloendopeptidase activity;integral component of membrane	K16068	ADAM22	http://www.genome.jp/dbget-bin/www_bget?ko:K16068	-	-	-	-	sp|Q9P0K1|ADA22_HUMAN	Disintegrin and metalloproteinase domain-containing protein 22 OS=Homo sapiens OX=9606 GN=ADAM22 PE=1 SV=1
gene86	1423	3.41	5.89	7.27	50.81	44.43	54	3.60696	7.10526e-16	1.10717e-13	chac2	XP_019134295.1	glutathione-specific gamma-glutamylcyclotransferase 2 isoform X1 [Larimichthys crocea]	GO:0061928;GO:0003839;GO:0016740;GO:0006751	glutathione specific gamma-glutamylcyclotransferase activity;gamma-glutamylcyclotransferase activity;transferase activity;glutathione catabolic process	K07232	CHAC,chaC	http://www.genome.jp/dbget-bin/www_bget?ko:K07232	Glutathione metabolism	ko00480	KOG3182	Predicted cation transporter	sp|Q4KMJ1|CHAC2_DANRE	Putative glutathione-specific gamma-glutamylcyclotransferase 2 OS=Danio rerio OX=7955 GN=chac2 PE=2 SV=1
gene2985	1521	2	1.98	1.99	9.51	4.49	56.31	3.59727	1.80878e-08	5.33505e-07	LOC104917859	TMS05938.1	DnaJ-like protein subfamily A member 4 [Larimichthys crocea]	GO:0009408;GO:0030544;GO:0046872;GO:0006457;GO:0005524;GO:0051082	response to heat;Hsp70 protein binding;metal ion binding;protein folding;ATP binding;unfolded protein binding	K09545	HSPB6	http://www.genome.jp/dbget-bin/www_bget?ko:K09545	-	-	KOG0712	Molecular chaperone (DnaJ superfamily)	sp|Q9JMC3|DNJA4_MOUSE	DnaJ homolog subfamily A member 4 OS=Mus musculus OX=10090 GN=Dnaja4 PE=1 SV=1
gene11531	1461	2.55	1.27	4.88	10.77	22.94	56.75	3.59346	8.25466e-09	2.68044e-07	LOC104927103	XP_010739414.2	acetylcholine receptor subunit alpha isoform X3 [Larimichthys crocea]	GO:0003428;GO:0086009;GO:0045211;GO:0043113;GO:0008045;GO:0015464;GO:0007274;GO:0030516;GO:0004888;GO:0016021;GO:0042166;GO:0048741;GO:0022848;GO:0005892	chondrocyte intercalation involved in growth plate cartilage morphogenesis;membrane repolarization;postsynaptic membrane;receptor clustering;motor neuron axon guidance;acetylcholine receptor activity;neuromuscular synaptic transmission;regulation of axon extension;transmembrane signaling receptor activity;integral component of membrane;acetylcholine binding;skeletal muscle fiber development;acety…	K04803	CHRNA1	http://www.genome.jp/dbget-bin/www_bget?ko:K04803	Neuroactive ligand-receptor interaction	ko04080	-	-	sp|Q98880|ACHA_DANRE	Acetylcholine receptor subunit alpha OS=Danio rerio OX=7955 GN=chrna1 PE=2 SV=1
gene6478	1630	0.93	0.32	0.94	2.61	10.04	4.61	3.59318	2.89693e-06	4.63922e-05	enkd1	TMS03251.1;XP_019120028.1	Enkurin domain-containing protein 1 [Larimichthys crocea];enkurin domain-containing protein 1 isoform X1 [Larimichthys crocea]	-	-	-	-	-	-	-	-	-	sp|Q3T078|ENKD1_BOVIN	Enkurin domain-containing protein 1 OS=Bos taurus OX=9913 GN=ENKD1 PE=2 SV=1
gene15915	4323	0.03	0.03	0.05	0.23	0.08	0.89	3.5907	0.000285618	0.0022611	umodl1	XP_019110570.2	uromodulin-like 1 [Larimichthys crocea]	-	-	K24499	UMODL1	http://www.genome.jp/dbget-bin/www_bget?ko:K24499	-	-	-	-	sp|Q5DID0|UROL1_HUMAN	Uromodulin-like 1 OS=Homo sapiens OX=9606 GN=UMODL1 PE=2 SV=2
gene10715	2565	4.66	2.79	22.2	157.06	65.39	36.43	3.58678	1.41404e-05	0.000179204	LOC104926216	KAE8288531.1	Kelch-like protein 38 [Larimichthys crocea]	-	-	K13959	KLHL38	http://www.genome.jp/dbget-bin/www_bget?ko:K13959	-	-	-	-	sp|Q1LYM6|KLH38_DANRE	Kelch-like protein 38 OS=Danio rerio OX=7955 GN=klhl38 PE=4 SV=1
gene7181	1553	1.98	2.56	1.56	7.11	8.07	53.46	3.57852	1.89828e-09	7.18042e-08	batf	XP_023151575.2	basic leucine zipper transcriptional factor ATF-like isoform X1 [Amphiprion ocellaris]	GO:0030154;GO:0005737;GO:0003700;GO:0003677;GO:0006357	cell differentiation;cytoplasm;DNA-binding transcription factor activity;DNA binding;regulation of transcription by RNA polymerase II	K09034	BATF	http://www.genome.jp/dbget-bin/www_bget?ko:K09034	PD-L1 expression and PD-1 checkpoint pathway in cancer	ko05235	-	-	sp|F1QW76|BATF_DANRE	Basic leucine zipper transcriptional factor ATF-like OS=Danio rerio OX=7955 GN=batf PE=3 SV=1
gene16221	11433	0.21	0.08	0.27	0.53	0.25	6.32	3.57561	2.74302e-05	0.000314677	LOC104932124	XP_019116554.2	microtubule-associated protein 1B isoform X2 [Larimichthys crocea]	GO:0005874;GO:0008017;GO:0000226	microtubule;microtubule binding;microtubule cytoskeleton organization	K10429	MAP1	http://www.genome.jp/dbget-bin/www_bget?ko:K10429	-	-	-	-	sp|P78559|MAP1A_HUMAN;sp|P34926|MAP1A_RAT	Microtubule-associated protein 1A OS=Homo sapiens OX=9606 GN=MAP1A PE=1 SV=6;Microtubule-associated protein 1A OS=Rattus norvegicus OX=10116 GN=Map1a PE=1 SV=1
gene4686	1622	0.18	0.44	1.59	13.74	3.38	1.53	3.5754	0.000146991	0.00129603	LOC104919711	XP_010730082.1	protein phosphatase 1B-like [Larimichthys crocea]	GO:0106306;GO:0106307;GO:0016020;GO:0030145;GO:0000287;GO:0005829	protein serine phosphatase activity;protein threonine phosphatase activity;membrane;manganese ion binding;magnesium ion binding;cytosol	K04457	PPM1A,PP2CA	http://www.genome.jp/dbget-bin/www_bget?ko:K04457	MAPK signaling pathway	ko04010	KOG0697	Protein phosphatase 1B (formerly 2C)	sp|P35815|PPM1B_RAT	Protein phosphatase 1B OS=Rattus norvegicus OX=10116 GN=Ppm1b PE=2 SV=1
novel.10766	1446	0.15	0.05	0.06	0.62	0.27	1.76	3.56588	0.00090253	0.00592503	-	TMS14543.1	Serine/threonine-protein kinase DCLK1 [Larimichthys crocea]	-	-	-	-	-	-	-	-	-	-	-
novel.21681	754	0.62	2.13	0.86	20.22	1.09	11.56	3.5649	4.5478e-05	0.000480906	-	KAF7640979.1	hypothetical protein LDENG_00001740 [Lucifuga dentata]	GO:0007275;GO:0005634;GO:0008168;GO:0016706;GO:0007154;GO:0003700;GO:0016021;GO:0005922;GO:0003677;GO:0003964	multicellular organism development;nucleus;methyltransferase activity;2-oxoglutarate-dependent dioxygenase activity;cell communication;DNA-binding transcription factor activity;integral component of membrane;connexin complex;DNA binding;RNA-directed DNA polymerase activity	K09326	OTX1	http://www.genome.jp/dbget-bin/www_bget?ko:K09326	Signaling pathways regulating pluripotency of stem cells	ko04550	-	-	-	-
gene23166	1795	0.04	0.14	0	1.19	0.07	0.29	3.56388	0.00974533	0.0413442	LOC104939486	XP_019130611.1	uncharacterized protein LOC104939486 isoform X1 [Larimichthys crocea]	GO:0005886;GO:0045121;GO:0035556;GO:0016021;GO:0050868;GO:0050853;GO:0050852	plasma membrane;membrane raft;intracellular signal transduction;integral component of membrane;negative regulation of T cell activation;B cell receptor signaling pathway;T cell receptor signaling pathway	-	-	-	-	-	-	-	-	-
novel.2280	1525	0.09	0.09	0.06	1.48	0.08	0.49	3.55831	0.00410463	0.0206419	-	-	-	-	-	-	-	-	-	-	-	-	-	-
gene22635	961	2.11	3.12	0.74	13.23	7.88	36.41	3.54796	1.61406e-10	7.84116e-09	LOC104938931	XP_027127895.1	olfactomedin-like [Larimichthys crocea]	-	-	-	-	-	-	-	-	-	sp|Q6UX06|OLFM4_HUMAN	Olfactomedin-4 OS=Homo sapiens OX=9606 GN=OLFM4 PE=1 SV=1
gene6797	2968	2.02	5.51	8.83	79.18	22.94	19	3.54609	3.53419e-07	7.46489e-06	slc22a16	TMS12411.1;KAE8286843.1	Solute carrier family 22 member 16 [Larimichthys crocea];Solute carrier family 22 member 16 Carnitine transporter 2 [Larimichthys crocea]	GO:0016021;GO:0022857	integral component of membrane;transmembrane transporter activity	K08212	SLC22A16	http://www.genome.jp/dbget-bin/www_bget?ko:K08212	-	-	-	-	sp|Q66KG0|S22AG_XENLA	Solute carrier family 22 member 16 OS=Xenopus laevis OX=8355 GN=slc22a16 PE=2 SV=2
gene10303	1834	3.37	1.02	1.12	13.6	8	32.01	3.54188	3.49934e-11	1.93959e-09	LOC104925761	KAE8279388.1	Leukotriene B4 receptor 1 [Larimichthys crocea]	GO:0009986;GO:0001632;GO:0016021;GO:0004974;GO:0055113;GO:0005886	cell surface;leukotriene B4 receptor activity;integral component of membrane;leukotriene receptor activity;epiboly involved in gastrulation with mouth forming second;plasma membrane	K04296	LTB4R1	http://www.genome.jp/dbget-bin/www_bget?ko:K04296	Neuroactive ligand-receptor interaction	ko04080	-	-	sp|Q15722|LT4R1_HUMAN	Leukotriene B4 receptor 1 OS=Homo sapiens OX=9606 GN=LTB4R PE=1 SV=2
gene23548	1496	1.62	1.43	0.88	7.02	4.51	28.75	3.5295	2.18008e-11	1.28298e-09	LOC104939896	XP_027127895.1	olfactomedin-like [Larimichthys crocea]	-	-	-	-	-	-	-	-	-	sp|Q6UX06|OLFM4_HUMAN	Olfactomedin-4 OS=Homo sapiens OX=9606 GN=OLFM4 PE=1 SV=1
gene5794	2020	34.1	39.94	88.18	377.24	598.11	309.92	3.52492	4.6968e-09	1.61847e-07	LOC104920922	XP_010731626.1	Y+L amino acid transporter 2 [Larimichthys crocea]	GO:0016021;GO:0022857	integral component of membrane;transmembrane transporter activity	K13872	SLC7A6	http://www.genome.jp/dbget-bin/www_bget?ko:K13872	-	-	-	-	sp|Q59I64|YLAT2_DANRE	Y+L amino acid transporter 2 OS=Danio rerio OX=7955 GN=slc7a6 PE=2 SV=1
gene15700	2099	0.94	0.62	0.64	2.24	3.44	17.38	3.51963	9.61482e-09	3.05406e-07	fosl1	XP_010744883.2	fos-related antigen 1 [Larimichthys crocea]	GO:0005634;GO:0003700;GO:0003677;GO:0006357	nucleus;DNA-binding transcription factor activity;DNA binding;regulation of transcription by RNA polymerase II	K09030	FOSL2	http://www.genome.jp/dbget-bin/www_bget?ko:K09030	Osteoclast differentiation	ko04380	-	-	sp|P10158|FOSL1_RAT	Fos-related antigen 1 OS=Rattus norvegicus OX=10116 GN=Fosl1 PE=2 SV=1
gene3536	2406	4.65	1.64	5.52	11.81	14.03	107.71	3.51916	3.06062e-07	6.57105e-06	sele	KAE8294237.1;TMS20753.1;XP_027146047.1	L-selectin CD62 antigen-like family member L Leukocyte adhesion molecule 1 [Larimichthys crocea];E-selectin [Larimichthys crocea];P-selectin [Larimichthys crocea]	GO:0046872;GO:0030246;GO:0005886;GO:0016021;GO:0007155	metal ion binding;carbohydrate binding;plasma membrane;integral component of membrane;cell adhesion	K06496	SELP,CD62P	http://www.genome.jp/dbget-bin/www_bget?ko:K06496	Cell adhesion molecules;Lipid and atherosclerosis;Staphylococcus aureus infection;Malaria;Coronavirus disease - COVID-19;Neutrophil extracellular trap formation	ko04514,ko05417,ko05150,ko05144,ko05171,ko04613	-	-	sp|P16109|LYAM3_HUMAN;sp|P30836|LYAM1_RAT;sp|Q95LG1|LYAM2_HORSE	P-selectin OS=Homo sapiens OX=9606 GN=SELP PE=1 SV=3;L-selectin OS=Rattus norvegicus OX=10116 GN=Sell PE=2 SV=1;E-selectin OS=Equus caballus OX=9796 GN=SELE PE=2 SV=1
gene6549	600	0.73	0.16	0.21	4.35	0.8	4.91	3.51379	0.000866357	0.00573927	LOC104921737	XP_029002257.1	guanine nucleotide-binding protein G(I)/G(S)/G(O) subunit gamma-12-like isoform X2 [Betta splendens]	GO:0005834;GO:0007186;GO:0031681	heterotrimeric G-protein complex;G protein-coupled receptor signaling pathway;G-protein beta-subunit binding	K04347	GNG12	http://www.genome.jp/dbget-bin/www_bget?ko:K04347	Regulation of actin cytoskeleton;Apelin signaling pathway;MAPK signaling pathway;PI3K-Akt signaling pathway;Ras signaling pathway;Pathways in cancer;Human cytomegalovirus infection;Human immunodeficiency virus 1 infection;Kaposi sarcoma-associated herpesvirus infection;Alcoholism;Morphine addiction;Relaxin signaling pathway;Circadian entrainment;Chemokine signaling pathway;Cholinergic synapse;Dop…	ko04810,ko04371,ko04010,ko04151,ko04014,ko05200,ko05163,ko05170,ko05167,ko05034,ko05032,ko04926,ko04713,ko04062,ko04725,ko04728,ko04727,ko04724,ko04723,ko04726	-	-	sp|Q28024|GBG12_BOVIN	Guanine nucleotide-binding protein G(I)/G(S)/G(O) subunit gamma-12 OS=Bos taurus OX=9913 GN=GNG12 PE=1 SV=2
gene9717	2102	13.44	19.65	34.69	228.35	154.67	203.38	3.51046	3.72619e-14	3.86276e-12	LOC104925159	KAE8283886.1;TKS89438.1;XP_027145378.1	26S proteasome non-ATPase regulatory subunit 11B [Larimichthys crocea];26S proteasome non-ATPase regulatory subunit 11B 26S proteasome regulatory subunit RPN6-B [Collichthys lucidus];26S proteasome non-ATPase regulatory subunit 11B [Larimichthys crocea]	GO:0005198;GO:0043248;GO:0000502;GO:0008541;GO:0006511	structural molecule activity;proteasome assembly;proteasome complex;proteasome regulatory particle, lid subcomplex;ubiquitin-dependent protein catabolic process	K03036	PSMD11,RPN6	http://www.genome.jp/dbget-bin/www_bget?ko:K03036	Proteasome;Epstein-Barr virus infection;Alzheimer disease;Amyotrophic lateral sclerosis;Huntington disease;Parkinson disease;Pathways of neurodegeneration - multiple diseases;Prion disease;Spinocerebellar ataxia	ko03050,ko05169,ko05010,ko05014,ko05016,ko05012,ko05022,ko05020,ko05017	KOG1463	26S proteasome regulatory complex, subunit RPN6/PSMD11	sp|F1QGH9|PS11B_DANRE	26S proteasome non-ATPase regulatory subunit 11B OS=Danio rerio OX=7955 GN=psmd11b PE=2 SV=1
gene4690	1763	31.31	13.68	60.29	511.45	183.91	185.81	3.51012	1.52526e-07	3.55836e-06	LOC104919715	XP_010730085.1	mitochondrial uncoupling protein 2 [Larimichthys crocea]	GO:0016021;GO:0031966;GO:0006839	integral component of membrane;mitochondrial membrane;mitochondrial transport	K15103	UCP2_3,SLC25A8_9	http://www.genome.jp/dbget-bin/www_bget?ko:K15103	-	-	KOG0753	Mitochondrial fatty acid anion carrier protein/Uncoupling protein	sp|P70406|UCP2_MOUSE	Mitochondrial uncoupling protein 2 OS=Mus musculus OX=10090 GN=Ucp2 PE=1 SV=1
gene21635	3637	0.79	0.29	0.41	3.66	2.66	7.4	3.5091	9.41477e-14	9.0411e-12	hmgcr	KAE8291523.1	3-hydroxy-3-methylglutaryl-coenzyme A reductase [Larimichthys crocea]	GO:0008299;GO:0005778;GO:0004420;GO:0016021;GO:0015936;GO:0005789;GO:0050661;GO:0006695	isoprenoid biosynthetic process;peroxisomal membrane;hydroxymethylglutaryl-CoA reductase (NADPH) activity;integral component of membrane;coenzyme A metabolic process;endoplasmic reticulum membrane;NADP binding;cholesterol biosynthetic process	K00021	HMGCR	http://www.genome.jp/dbget-bin/www_bget?ko:K00021	AMPK signaling pathway;Terpenoid backbone biosynthesis;Bile secretion	ko04152,ko00900,ko04976	KOG2480	3-hydroxy-3-methylglutaryl-CoA (HMG-CoA) reductase	sp|A7Z064|HMDH_BOVIN	3-hydroxy-3-methylglutaryl-coenzyme A reductase OS=Bos taurus OX=9913 GN=HMGCR PE=2 SV=2
novel.20053	961	2.7	6.96	2.65	51.6	63.64	14.59	3.5019	1.36233e-09	5.35763e-08	-	-	-	-	-	-	-	-	-	-	-	-	-	-
gene7524	3080	0.22	0.11	0.31	1.8	0.78	3.91	3.49445	1.25313e-08	3.88582e-07	cpeb1	XP_028258395.1;TMS13247.1	cytoplasmic polyadenylation element-binding protein 1 isoform X2 [Parambassis ranga];Cytoplasmic polyadenylation element-binding protein 1 [Larimichthys crocea]	GO:0003730;GO:0046872;GO:0045182;GO:0006397;GO:0005737;GO:0032991	mRNA 3'-UTR binding;metal ion binding;translation regulator activity;mRNA processing;cytoplasm;protein-containing complex	K02602	CPEB,ORB	http://www.genome.jp/dbget-bin/www_bget?ko:K02602	Oocyte meiosis;Dorso-ventral axis formation;Progesterone-mediated oocyte maturation	ko04114,ko04320,ko04914	KOG0129	Predicted RNA-binding protein (RRM superfamily)	sp|Q9YGX5|CPEB1_DANRE	Cytoplasmic polyadenylation element-binding protein 1 OS=Danio rerio OX=7955 GN=cpeb1 PE=1 SV=1
gene5027	815	12.83	9.32	14.22	120.73	89.44	74.83	3.48354	3.42351e-13	2.97529e-11	LOC104920089	TKS84305.1;XP_027134395.1	Eukaryotic translation initiation factor 4E-binding protein 1 [Collichthys lucidus];eukaryotic translation initiation factor 4E-binding protein 2 isoform X2 [Larimichthys crocea]	GO:0003743;GO:0008190;GO:0045947	translation initiation factor activity;eukaryotic initiation factor 4E binding;negative regulation of translational initiation	K07205	EIF4EBP1	http://www.genome.jp/dbget-bin/www_bget?ko:K07205	Cellular senescence;AMPK signaling pathway;ErbB signaling pathway;HIF-1 signaling pathway;PI3K-Akt signaling pathway;mTOR signaling pathway;Chemical carcinogenesis - receptor activation;Choline metabolism in cancer;Acute myeloid leukemia;EGFR tyrosine kinase inhibitor resistance;Herpes simplex virus 1 infection;Human cytomegalovirus infection;Human papillomavirus infection;Longevity regulating pa…	ko04218,ko04152,ko04012,ko04066,ko04151,ko04150,ko05207,ko05231,ko05221,ko01521,ko05168,ko05163,ko05165,ko04211,ko04910	-	-	sp|P70445|4EBP2_MOUSE;sp|Q13541|4EBP1_HUMAN	Eukaryotic translation initiation factor 4E-binding protein 2 OS=Mus musculus OX=10090 GN=Eif4ebp2 PE=1 SV=1;Eukaryotic translation initiation factor 4E-binding protein 1 OS=Homo sapiens OX=9606 GN=EIF4EBP1 PE=1 SV=3
gene9331	1023	4.52	1.72	3.5	22.42	14.12	55.18	3.4721	1.441e-12	1.07537e-10	arl14	XP_010736489.1	ADP-ribosylation factor-like protein 14 [Larimichthys crocea]	GO:0005525	GTP binding	K17200	ARL14,ARF7	http://www.genome.jp/dbget-bin/www_bget?ko:K17200	-	-	KOG0070	GTP-binding ADP-ribosylation factor Arf1	sp|Q8N4G2|ARL14_HUMAN	ADP-ribosylation factor-like protein 14 OS=Homo sapiens OX=9606 GN=ARL14 PE=1 SV=2
gene16273	2540	15.2	15.73	23.73	225.39	95.84	122.4	3.47086	1.29838e-12	9.77771e-11	LOC104932176	XP_019112659.1	eukaryotic translation initiation factor 4E type 3 [Larimichthys crocea]	GO:0003743	translation initiation factor activity	-	-	-	-	-	KOG1670	Translation initiation factor 4F, cap-binding subunit (eIF-4E) and related cap-binding proteins	sp|Q66HY7|IF4E3_DANRE	Eukaryotic translation initiation factor 4E type 3 OS=Danio rerio OX=7955 GN=eif4e3 PE=2 SV=1
gene5075	2139	0.03	0.14	0.19	0.94	1.04	0.81	3.46978	2.77104e-05	0.000317408	LOC104920185	XP_010730663.2	XK-related protein 5-like isoform X3 [Larimichthys crocea]	GO:0016021	integral component of membrane	-	-	-	-	-	-	-	sp|Q49LS3|XKR5_PANTR	XK-related protein 5 OS=Pan troglodytes OX=9598 GN=XKR5 PE=2 SV=1
novel.18470	713	0.68	0.24	0	2.32	2.15	3.03	3.46715	0.000340868	0.0026238	Apod	XP_019122535.2	apolipoprotein D-like [Larimichthys crocea]	GO:0007568;GO:0006869;GO:0005576;GO:0008289	aging;lipid transport;extracellular region;lipid binding	K03098	APOD	http://www.genome.jp/dbget-bin/www_bget?ko:K03098	-	-	-	-	sp|P51910|APOD_MOUSE	Apolipoprotein D OS=Mus musculus OX=10090 GN=Apod PE=1 SV=1
novel.18194	455	43.77	37.12	10.73	120.95	172.91	889.58	3.46085	5.91249e-09	1.99847e-07	-	XP_027144931.1;XP_027144930.1	uncharacterized protein LOC113747831 isoform X2 [Larimichthys crocea];neurotoxin 3FTx-RI-like isoform X1 [Larimichthys crocea]	-	-	K06846	LY6D_E_F_G6_H	http://www.genome.jp/dbget-bin/www_bget?ko:K06846	-	-	-	-	-	-
gene15021	989	0.24	0.14	0.43	1.97	0.97	2.44	3.45929	0.000142506	0.00126414	LOC104930817	XP_027142895.1	CD209 antigen-like protein C isoform X2 [Larimichthys crocea]	GO:0030246;GO:0016021	carbohydrate binding;integral component of membrane	K10064	ASGR2	http://www.genome.jp/dbget-bin/www_bget?ko:K10064	Thyroid hormone synthesis	ko04918	-	-	sp|Q9R0Q8|CLC4E_MOUSE	C-type lectin domain family 4 member E OS=Mus musculus OX=10090 GN=Clec4e PE=1 SV=1
novel.15965	703	8.48	2.24	1.99	5.5	44.76	47.61	3.45901	1.40296e-05	0.000178072	-	-	-	-	-	-	-	-	-	-	-	-	-	-
gene7171	1670	2.08	5.28	4.35	13.86	26.67	66.34	3.45335	8.23688e-11	4.24276e-09	LOC104922420	KAE8286887.1	Proto-oncogene c-Fos Cellular oncogene fos [Larimichthys crocea]	GO:0003677;GO:0006357;GO:0033555;GO:0003700;GO:0005667;GO:0003690	DNA binding;regulation of transcription by RNA polymerase II;multicellular organismal response to stress;DNA-binding transcription factor activity;transcription regulator complex;double-stranded DNA binding	K04379	FOS	http://www.genome.jp/dbget-bin/www_bget?ko:K04379	Apoptosis;MAPK signaling pathway;TNF signaling pathway;cAMP signaling pathway;Chemical carcinogenesis - reactive oxygen species;Chemical carcinogenesis - receptor activation;Choline metabolism in cancer;PD-L1 expression and PD-1 checkpoint pathway in cancer;Pathways in cancer;Breast cancer;Colorectal cancer;Fluid shear stress and atherosclerosis;Lipid and atherosclerosis;Endocrine resistance;Non-…	ko04210,ko04010,ko04668,ko04024,ko05208,ko05207,ko05231,ko05235,ko05200,ko05224,ko05210,ko05418,ko05417,ko01522,ko04932,ko05323,ko05130,ko05133,ko05132,ko05135,ko05142,ko05140,ko05171,ko05161,ko05166,ko05170,ko05167,ko05162,ko05031,ko04380,ko04915,ko04935,ko04921,ko04928,ko04917,ko04926,ko04713,ko04662,ko04657,ko04660,ko04658,ko04659,ko04620,ko04725,ko04728	-	-	sp|P53450|FOS_TAKRU	Proto-oncogene c-Fos OS=Takifugu rubripes OX=31033 GN=fos PE=3 SV=1
novel.15889	286	2.84	2.81	9.42	28.02	28.53	23.64	3.44343	0.000526788	0.00377326	-	XP_019131017.1	oxidoreductase NAD-binding domain-containing protein 1 [Larimichthys crocea]	GO:0016491;GO:0004128	oxidoreductase activity;cytochrome-b5 reductase activity, acting on NAD(P)H	-	-	-	-	-	-	-	-	-
gene22884	1229	18.05	33.68	27.08	376.67	85.35	161.69	3.44059	1.52872e-09	5.90884e-08	LOC104939188	XP_010753986.1	regulator of cell cycle RGCC-like [Larimichthys crocea]	GO:0051726	regulation of cell cycle	-	-	-	-	-	-	-	sp|Q9DBX1|RGCC_MOUSE	Regulator of cell cycle RGCC OS=Mus musculus OX=10090 GN=Rgcc PE=1 SV=1
gene19213	1151	7.55	25.92	10.46	19.69	145.48	182.74	3.43274	1.47431e-06	2.57598e-05	neurl3	XP_010749438.3	E3 ubiquitin-protein ligase NEURL3 [Larimichthys crocea]	GO:0046872	metal ion binding	K15689	NEURL3,LINCR	http://www.genome.jp/dbget-bin/www_bget?ko:K15689	-	-	KOG4625	Notch signaling protein Neuralized, Nuez domain	sp|Q96EH8|NEUL3_HUMAN	E3 ubiquitin-protein ligase NEURL3 OS=Homo sapiens OX=9606 GN=NEURL3 PE=2 SV=2
novel.19291	1785	0.2	0.25	0	2.77	0.07	0.56	3.43268	0.00571765	0.0268653	CLEC4M	XP_019125255.1	CD209 antigen-like protein E [Larimichthys crocea]	GO:0030246	carbohydrate binding	K06721	CLEC10A,CLECSF13,CLECSF14,CD301	http://www.genome.jp/dbget-bin/www_bget?ko:K06721	-	-	-	-	sp|Q8HY06|CLC4M_GORGO	C-type lectin domain family 4 member M OS=Gorilla gorilla gorilla OX=9595 GN=CLEC4M PE=3 SV=1
gene20070	3949	7.6	8.69	8.9	76.98	57.93	59.17	3.43244	1.72982e-17	3.63204e-15	nploc4	XP_027144858.1	nuclear protein localization protein 4 homolog [Larimichthys crocea]	GO:0046872;GO:0006511	metal ion binding;ubiquitin-dependent protein catabolic process	K14015	NPLOC4,NPL4	http://www.genome.jp/dbget-bin/www_bget?ko:K14015	Protein processing in endoplasmic reticulum	ko04141	KOG2834	Nuclear pore complex, rNpl4 component (sc Npl4)	sp|Q8TAT6|NPL4_HUMAN	Nuclear protein localization protein 4 homolog OS=Homo sapiens OX=9606 GN=NPLOC4 PE=1 SV=3
gene13802	1703	43.41	7.45	21.65	190.39	212.11	119.5	3.42777	1.53526e-07	3.57832e-06	LOC104929527	TMS14762.1	Protein phosphatase 1 regulatory subunit 27 [Larimichthys crocea]	-	-	K17566	PPP1R27	http://www.genome.jp/dbget-bin/www_bget?ko:K17566	-	-	-	-	sp|Q9D119|PPR27_MOUSE	Protein phosphatase 1 regulatory subunit 27 OS=Mus musculus OX=10090 GN=Ppp1r27 PE=2 SV=1
gene8758	8912	0.28	0.09	0.22	0.45	0.87	4.54	3.41856	8.25198e-07	1.54419e-05	adamts9	XP_027134778.1	A disintegrin and metalloproteinase with thrombospondin motifs 9 [Larimichthys crocea]	GO:0004222;GO:0008270;GO:0005576	metalloendopeptidase activity;zinc ion binding;extracellular region	K08624	ADAMTS9	http://www.genome.jp/dbget-bin/www_bget?ko:K08624	-	-	KOG3538	Disintegrin metalloproteinases with thrombospondin repeats	sp|Q9P2N4|ATS9_HUMAN	A disintegrin and metalloproteinase with thrombospondin motifs 9 OS=Homo sapiens OX=9606 GN=ADAMTS9 PE=1 SV=4
gene21166	1868	1.52	2.26	2.55	6.07	8.47	48.78	3.40718	1.64743e-08	4.91176e-07	LOC104937362	XP_010751877.1;XP_010751876.1	serine/threonine-protein kinase Sgk1 isoform X2 [Larimichthys crocea];serine/threonine-protein kinase Sgk1 isoform X1 [Larimichthys crocea]	GO:0004674;GO:0035091;GO:0005524	protein serine/threonine kinase activity;phosphatidylinositol binding;ATP binding	K13302	SGK1	http://www.genome.jp/dbget-bin/www_bget?ko:K13302	FoxO signaling pathway;PI3K-Akt signaling pathway;mTOR signaling pathway;Aldosterone-regulated sodium reabsorption	ko04068,ko04151,ko04150,ko04960	KOG0598	Ribosomal protein S6 kinase and related proteins	sp|Q6U1I9|SGK1_CHICK	Serine/threonine-protein kinase Sgk1 OS=Gallus gallus OX=9031 GN=SGK1 PE=2 SV=1
gene19315	3142	1.64	0.68	0.99	10.12	7.09	8.63	3.40279	1.19552e-12	9.11391e-11	tmem178a	XP_027132513.1	transmembrane protein 178A [Larimichthys crocea]	GO:0016021	integral component of membrane	-	-	-	-	-	-	-	sp|Q08CE6|T178A_DANRE	Transmembrane protein 178A OS=Danio rerio OX=7955 GN=tmem178a PE=2 SV=1
gene21749	4237	0.64	1.48	1.22	2.82	4.61	25.62	3.39908	6.37195e-08	1.63543e-06	adamts1	XP_010752626.3	A disintegrin and metalloproteinase with thrombospondin motifs 1 [Larimichthys crocea]	GO:0005576;GO:0008270;GO:0031012;GO:0004222;GO:0007229	extracellular region;zinc ion binding;extracellular matrix;metalloendopeptidase activity;integrin-mediated signaling pathway	K08617	ADAMTS1	http://www.genome.jp/dbget-bin/www_bget?ko:K08617	-	-	-	-	sp|Q9WUQ1|ATS1_RAT	A disintegrin and metalloproteinase with thrombospondin motifs 1 OS=Rattus norvegicus OX=10116 GN=Adamts1 PE=2 SV=1
gene21302	1914	79.15	17.47	62.79	119.51	611.32	432.87	3.39213	1.95913e-06	3.29305e-05	ppp1r3c	TMS04191.1	Protein phosphatase 1 regulatory subunit 3C-B, partial [Larimichthys crocea]	GO:0005977	glycogen metabolic process	K07189	PPP1R3	http://www.genome.jp/dbget-bin/www_bget?ko:K07189	Insulin resistance;Insulin signaling pathway	ko04931,ko04910	-	-	sp|Q6P950|PR3CB_DANRE	Protein phosphatase 1 regulatory subunit 3C-B OS=Danio rerio OX=7955 GN=ppp1r3cb PE=2 SV=1
novel.7893	1459	1.84	7.68	2.3	29.09	6.4	18.29	3.39037	3.18543e-08	8.78868e-07	-	-	-	-	-	-	-	-	-	-	-	-	-	-
novel.19849	495	65.58	34.43	38.93	278.71	84.65	959.81	3.38636	8.77401e-09	2.82318e-07	mta	TMS05220.1	hypothetical protein E3U43_004470, partial [Larimichthys crocea]	GO:0046872	metal ion binding	K14739	MT1_2	http://www.genome.jp/dbget-bin/www_bget?ko:K14739	Longevity regulating pathway - worm;Mineral absorption	ko04212,ko04978	-	-	sp|P68506|MTA_CHIHA	Metallothionein A OS=Chionodraco hamatus OX=36188 GN=mta PE=3 SV=1
gene10126	1641	0.04	0.08	0.1	0.19	0.92	0.41	3.38207	0.00426758	0.021313	LOC104925589	XP_010737543.1	pyridoxal kinase [Larimichthys crocea]	GO:0008478;GO:0009443	pyridoxal kinase activity;pyridoxal 5'-phosphate salvage	K00868	pdxK,pdxY	http://www.genome.jp/dbget-bin/www_bget?ko:K00868	Vitamin B6 metabolism	ko00750	KOG2599	Pyridoxal/pyridoxine/pyridoxamine kinase	sp|O46560|PDXK_PIG	Pyridoxal kinase OS=Sus scrofa OX=9823 GN=PDXK PE=1 SV=1
gene3322	1114	50.47	65.79	45.71	475.8	272.95	513.6	3.37794	3.04567e-25	1.67688e-22	psmd14	KAF7667915.1	hypothetical protein LDENG_00041560 [Lucifuga dentata]	GO:0004843;GO:0008237;GO:0000502;GO:0043161;GO:0008541;GO:0001878;GO:0016579;GO:0061578;GO:0070122;GO:0070628	thiol-dependent deubiquitinase;metallopeptidase activity;proteasome complex;proteasome-mediated ubiquitin-dependent protein catabolic process;proteasome regulatory particle, lid subcomplex;response to yeast;protein deubiquitination;Lys63-specific deubiquitinase activity;isopeptidase activity;proteasome binding	K03030	PSMD14,RPN11,POH1	http://www.genome.jp/dbget-bin/www_bget?ko:K03030	Proteasome;Epstein-Barr virus infection;Alzheimer disease;Amyotrophic lateral sclerosis;Huntington disease;Parkinson disease;Pathways of neurodegeneration - multiple diseases;Prion disease;Spinocerebellar ataxia	ko03050,ko05169,ko05010,ko05014,ko05016,ko05012,ko05022,ko05020,ko05017	KOG1555	26S proteasome regulatory complex, subunit RPN11	sp|O00487|PSDE_HUMAN	26S proteasome non-ATPase regulatory subunit 14 OS=Homo sapiens OX=9606 GN=PSMD14 PE=1 SV=1
gene6986	682	304.33	57.76	202.23	577.99	601.77	4391.72	3.37287	1.26406e-06	2.2515e-05	pmp2	XP_010733291.1	myelin P2 protein [Larimichthys crocea]	GO:0008289;GO:0001654	lipid binding;eye development	K08752	FABP3	http://www.genome.jp/dbget-bin/www_bget?ko:K08752	PPAR signaling pathway	ko03320	KOG4015	Fatty acid-binding protein FABP	sp|Q4TZH2|FABPH_BOSMU	Fatty acid-binding protein, heart OS=Bos mutus grunniens OX=30521 GN=FABP3 PE=3 SV=3
gene12448	672	0.19	1.64	4.34	32.01	6.98	6.69	3.36803	0.00047741	0.00347892	LOC104928089	XP_019115808.1	telethonin [Larimichthys crocea]	-	-	K19879	TCAP	http://www.genome.jp/dbget-bin/www_bget?ko:K19879	-	-	-	-	sp|O15273|TELT_HUMAN	Telethonin OS=Homo sapiens OX=9606 GN=TCAP PE=1 SV=1
gene5704	2642	2	2.18	1.14	6.36	12.53	5.91	3.36303	2.58635e-08	7.32337e-07	mapkapk5	XP_010731500.1;KAF0034040.1	MAP kinase-activated protein kinase 5 isoform X1 [Larimichthys crocea];hypothetical protein F2P81_014106 [Scophthalmus maximus]	GO:0005524;GO:0004672	ATP binding;protein kinase activity	K04442	MAPKAPK5,PRAK	http://www.genome.jp/dbget-bin/www_bget?ko:K04442	MAPK signaling pathway	ko04010	KOG0604	MAP kinase-activated protein kinase 2	sp|O54992|MAPK5_MOUSE	MAP kinase-activated protein kinase 5 OS=Mus musculus OX=10090 GN=Mapkapk5 PE=1 SV=1
gene10714	2425	24.61	26.42	88.85	555.47	282.76	197.21	3.35672	7.85848e-07	1.48288e-05	fbxo32	KAE8288530.1	F-box only protein 32 [Larimichthys crocea]	GO:0008345;GO:0005737;GO:0060047;GO:0016567;GO:0006914;GO:0055008;GO:0046716;GO:0005634	larval locomotory behavior;cytoplasm;heart contraction;protein ubiquitination;autophagy;cardiac muscle tissue morphogenesis;muscle cell cellular homeostasis;nucleus	K10305	FBXO25_32	http://www.genome.jp/dbget-bin/www_bget?ko:K10305	FoxO signaling pathway	ko04068	-	-	sp|Q2KHT6|FBX32_BOVIN	F-box only protein 32 OS=Bos taurus OX=9913 GN=FBXO32 PE=2 SV=1
gene18004	1545	0.05	0.08	0.05	0.77	0.21	0.44	3.35601	0.00519067	0.0249426	ackr3	XP_010747862.2	atypical chemokine receptor 3 isoform X2 [Larimichthys crocea]	GO:0006935;GO:0015026;GO:0001525;GO:0019956;GO:0016021;GO:0001570;GO:0004930	chemotaxis;coreceptor activity;angiogenesis;chemokine binding;integral component of membrane;vasculogenesis;G protein-coupled receptor activity	K04304	CXCR7,ACKR3,RDC1	http://www.genome.jp/dbget-bin/www_bget?ko:K04304	Cytokine-cytokine receptor interaction;Viral protein interaction with cytokine and cytokine receptor	ko04060,ko04061	-	-	sp|P11613|ACKR3_CANLF	Atypical chemokine receptor 3 OS=Canis lupus familiaris OX=9615 GN=ACKR3 PE=2 SV=1
gene4591	1944	0.04	0.23	0	0.31	0.38	1.67	3.35287	0.00221597	0.0125064	LOC104919653	XP_010730020.2	5-aminolevulinate synthase, nonspecific, mitochondrial isoform X2 [Larimichthys crocea]	GO:0030170;GO:0006782;GO:0003870;GO:0005759	pyridoxal phosphate binding;protoporphyrinogen IX biosynthetic process;5-aminolevulinate synthase activity;mitochondrial matrix	K00643	E2.3.1.37,ALAS	http://www.genome.jp/dbget-bin/www_bget?ko:K00643	Glycine, serine and threonine metabolism;Porphyrin and chlorophyll metabolism	ko00260,ko00860	KOG1360	5-aminolevulinate synthase	sp|P43091|HEM1_OPSTA	5-aminolevulinate synthase, nonspecific, mitochondrial OS=Opsanus tau OX=8068 GN=alas1 PE=2 SV=1
novel.14879	1198	0.06	0.06	0.15	0.67	0.11	1.69	3.34707	0.00738544	0.0330769	-	-	-	-	-	-	-	-	-	-	-	-	-	-
gene16720	3221	0.27	0.19	0.37	0.76	1.58	6.21	3.34174	3.35042e-07	7.10703e-06	LOC104932672	XP_027147251.1;XP_027147263.1	arf-GAP with SH3 domain, ANK repeat and PH domain-containing protein 1 isoform X1 [Larimichthys crocea];arf-GAP with SH3 domain, ANK repeat and PH domain-containing protein 1 isoform X3 [Larimichthys crocea]	-	-	K12488	ASAP	http://www.genome.jp/dbget-bin/www_bget?ko:K12488	Endocytosis;Fc gamma R-mediated phagocytosis	ko04144,ko04666	KOG0521	Putative GTPase activating proteins (GAPs)	sp|O97902|ASAP1_BOVIN;sp|Q9ULH1|ASAP1_HUMAN	Arf-GAP with SH3 domain, ANK repeat and PH domain-containing protein 1 OS=Bos taurus OX=9913 GN=ASAP1 PE=1 SV=1;Arf-GAP with SH3 domain, ANK repeat and PH domain-containing protein 1 OS=Homo sapiens OX=9606 GN=ASAP1 PE=1 SV=4
gene789	2163	0.03	0.17	0.04	0.66	0.42	0.8	3.34099	0.000266199	0.00212205	LOC104923231	KAE8285122.1	Oxysterol-binding protein 2 Oxysterol-binding protein-related protein 4 [Larimichthys crocea]	GO:0006869;GO:0008289	lipid transport;lipid binding	K20462	OSBP2,ORP4	http://www.genome.jp/dbget-bin/www_bget?ko:K20462	-	-	KOG1737	Oxysterol-binding protein	sp|Q969R2|OSBP2_HUMAN	Oxysterol-binding protein 2 OS=Homo sapiens OX=9606 GN=OSBP2 PE=1 SV=2
novel.21550	2537	0.05	0.14	0.12	0.16	1.39	0.47	3.33839	0.00111413	0.00705433	-	XP_034093136.1	uncharacterized protein LOC117560379 [Gymnodraco acuticeps]	GO:0015074;GO:0003676	DNA integration;nucleic acid binding	-	-	-	-	-	-	-	-	-
gene6048	4667	0.91	1.29	1.56	8.44	9.75	8.8	3.33508	4.28921e-13	3.60236e-11	LOC104921180	KAE8300422.1	Guanine nucleotide exchange protein SMCR8 [Larimichthys crocea]	-	-	K23611	SMCR8	http://www.genome.jp/dbget-bin/www_bget?ko:K23611	Autophagy - animal;Amyotrophic lateral sclerosis;Pathways of neurodegeneration - multiple diseases	ko04140,ko05014,ko05022	-	-	sp|Q3UMB5|SMCR8_MOUSE	Guanine nucleotide exchange protein SMCR8 OS=Mus musculus OX=10090 GN=Smcr8 PE=1 SV=2
novel.18448	473	0.9	0.81	0.69	2.51	7.61	6.85	3.33237	0.000320552	0.00249434	-	-	-	-	-	-	-	-	-	-	-	-	-	-
gene10674	1782	0.24	0.21	0.09	0.55	0.59	3.86	3.32425	7.20314e-05	0.00071386	LOC104926168	KAE8290734.1	MAM and LDL-receptor class A domain-containing protein 2 [Larimichthys crocea]	GO:0016021	integral component of membrane	-	-	-	-	-	-	-	sp|B3EWZ5|MLRP1_ACRMI	MAM and LDL-receptor class A domain-containing protein 1 (Fragment) OS=Acropora millepora OX=45264 PE=1 SV=1
gene6083	1678	0.34	0.46	0.25	1.36	2.16	4.82	3.31195	3.77054e-08	1.02321e-06	dnajb5	XP_010731987.1	dnaJ homolog subfamily B member 5 [Larimichthys crocea]	GO:0006457;GO:0051082	protein folding;unfolded protein binding	K09511	DNAJB5	http://www.genome.jp/dbget-bin/www_bget?ko:K09511	-	-	KOG0714	Molecular chaperone (DnaJ superfamily)	sp|O89114|DNJB5_MOUSE	DnaJ homolog subfamily B member 5 OS=Mus musculus OX=10090 GN=Dnajb5 PE=2 SV=1
gene17496	4048	6.05	3.76	4.05	34.68	22.54	49.31	3.30337	5.64485e-23	2.41132e-20	hmgcs1	XP_010747211.1	hydroxymethylglutaryl-CoA synthase, cytoplasmic [Larimichthys crocea]	GO:0006084;GO:0014033;GO:0010142;GO:0014003;GO:0048703;GO:0048821;GO:0006695;GO:0004421	acetyl-CoA metabolic process;neural crest cell differentiation;farnesyl diphosphate biosynthetic process, mevalonate pathway;oligodendrocyte development;embryonic viscerocranium morphogenesis;erythrocyte development;cholesterol biosynthetic process;hydroxymethylglutaryl-CoA synthase activity	K01641	HMGCS	http://www.genome.jp/dbget-bin/www_bget?ko:K01641	Valine, leucine and isoleucine degradation;Butanoate metabolism;Terpenoid backbone biosynthesis;PPAR signaling pathway	ko00280,ko00650,ko00900,ko03320	KOG1393	Hydroxymethylglutaryl-CoA synthase	sp|P23228|HMCS1_CHICK	Hydroxymethylglutaryl-CoA synthase, cytoplasmic OS=Gallus gallus OX=9031 GN=HMGCS1 PE=1 SV=1
novel.1704	978	0.35	0.16	0.3	2.26	0.15	0.95	3.29681	0.0106205	0.0442763	-	-	-	-	-	-	-	-	-	-	-	-	-	-
gene22634	703	1.21	0.77	0.85	3.64	6.6	13.37	3.29531	5.52044e-07	1.09065e-05	LOC104938928	XP_027127895.1;XP_027127898.1	olfactomedin-like [Larimichthys crocea];olfactomedin-like [Larimichthys crocea]	-	-	-	-	-	-	-	-	-	sp|Q6UX06|OLFM4_HUMAN;sp|Q07081|OLFM_LITCT	Olfactomedin-4 OS=Homo sapiens OX=9606 GN=OLFM4 PE=1 SV=1;Olfactomedin OS=Lithobates catesbeianus OX=8400 PE=1 SV=1
gene20471	1414	1.6	1.82	3.2	7.2	26.15	12.09	3.29208	2.27053e-06	3.73785e-05	znrf1	TKS72936.1	putative D-lactate dehydrogenase, mitochondrial [Collichthys lucidus]	GO:0071949;GO:0016491;GO:0046872	FAD binding;oxidoreductase activity;metal ion binding	K10694	ZNRF1_2	http://www.genome.jp/dbget-bin/www_bget?ko:K10694	-	-	-	-	sp|Q6P4U6|ZNRF1_DANRE	E3 ubiquitin-protein ligase znrf1 OS=Danio rerio OX=7955 GN=znrf1 PE=2 SV=1
gene4869	2608	2.69	2.4	7.37	2.59	54.36	25.18	3.29105	0.000211082	0.00175437	nr4a1	TMS16173.1	Nuclear receptor subfamily 4 group A member 1 [Larimichthys crocea]	GO:0008270;GO:0004879;GO:0005634;GO:0043565	zinc ion binding;nuclear receptor activity;nucleus;sequence-specific DNA binding	K04465	NR4A1,HMR	http://www.genome.jp/dbget-bin/www_bget?ko:K04465	MAPK signaling pathway;PI3K-Akt signaling pathway;Cushing syndrome;Aldosterone synthesis and secretion;Cortisol synthesis and secretion	ko04010,ko04151,ko04934,ko04925,ko04927	-	-	sp|Q04913|NR4A1_XENLA	Nuclear receptor subfamily 4 group A member 1 OS=Xenopus laevis OX=8355 GN=nr4a1 PE=2 SV=1
gene193	2443	4.13	1.12	2.64	7.65	9.13	55.53	3.28838	3.71584e-07	7.78303e-06	LOC104936811	TMS19801.1	Protein-glutamine gamma-glutamyltransferase 2 [Larimichthys crocea]	GO:0003810;GO:0018149;GO:0046872	protein-glutamine gamma-glutamyltransferase activity;peptide cross-linking;metal ion binding	K05625	TGM2	http://www.genome.jp/dbget-bin/www_bget?ko:K05625	Huntington disease	ko05016	-	-	sp|P08587|TGM2_CAVCU	Protein-glutamine gamma-glutamyltransferase 2 OS=Cavia cutleri OX=10144 GN=TGM2 PE=1 SV=4
gene2692	835	12.18	8.14	13.37	112.47	60.64	61.1	3.28795	3.76049e-11	2.06578e-09	LOC104940621	TKS73623.1	B-cell receptor-associated protein 29 [Collichthys lucidus]	GO:0070973;GO:0006886;GO:0005789;GO:0016021;GO:0006888	protein localization to endoplasmic reticulum exit site;intracellular protein transport;endoplasmic reticulum membrane;integral component of membrane;endoplasmic reticulum to Golgi vesicle-mediated transport	-	-	-	-	-	KOG1962	B-cell receptor-associated protein and related proteins	sp|Q9UHQ4|BAP29_HUMAN	B-cell receptor-associated protein 29 OS=Homo sapiens OX=9606 GN=BCAP29 PE=1 SV=2
gene2541	1425	59.22	73.83	74.65	586.15	359.3	574.35	3.28624	1.55116e-20	5.05678e-18	psmd7	TKS73334.1	26S proteasome non-ATPase regulatory subunit 7 26S proteasome regulatory subunit RPN8 [Collichthys lucidus]	GO:0008237;GO:1904888;GO:0070122;GO:0021551;GO:0005838	metallopeptidase activity;cranial skeletal system development;isopeptidase activity;central nervous system morphogenesis;proteasome regulatory particle	K03038	PSMD7,RPN8	http://www.genome.jp/dbget-bin/www_bget?ko:K03038	Proteasome;Epstein-Barr virus infection;Alzheimer disease;Amyotrophic lateral sclerosis;Huntington disease;Parkinson disease;Pathways of neurodegeneration - multiple diseases;Prion disease;Spinocerebellar ataxia	ko03050,ko05169,ko05010,ko05014,ko05016,ko05012,ko05022,ko05020,ko05017	KOG1556	26S proteasome regulatory complex, subunit RPN8/PSMD7	sp|P26516|PSMD7_MOUSE	26S proteasome non-ATPase regulatory subunit 7 OS=Mus musculus OX=10090 GN=Psmd7 PE=1 SV=2
gene5282	2045	0.17	0.36	0.12	0.47	0.74	4.67	3.28369	7.49627e-05	0.000737307	LOC104920372	XP_010730917.1	elongation factor 1-alpha 1 [Larimichthys crocea]	GO:0003746;GO:0003924;GO:0005525	translation elongation factor activity;GTPase activity;GTP binding	K03231	EEF1A	http://www.genome.jp/dbget-bin/www_bget?ko:K03231	Nucleocytoplasmic transport;Legionellosis;Leishmaniasis	ko03013,ko05134,ko05140	KOG0052	Translation elongation factor EF-1 alpha/Tu	sp|P68103|EF1A1_BOVIN	Elongation factor 1-alpha 1 OS=Bos taurus OX=9913 GN=EEF1A1 PE=1 SV=1
gene1169	2213	1.74	2.4	1.63	22.37	7.86	8.54	3.28081	3.36516e-09	1.20484e-07	def8	XP_010739830.1	differentially expressed in FDCP 8 homolog isoform X1 [Larimichthys crocea]	GO:0035556	intracellular signal transduction	-	-	-	-	-	KOG1829	Uncharacterized conserved protein, contains C1, PH and RUN domains	sp|Q6DJB3|DEFI8_XENTR	Differentially expressed in FDCP 8 homolog OS=Xenopus tropicalis OX=8364 GN=def8 PE=2 SV=1
gene7867	3610	1.81	1.74	4.19	12.32	25.37	14.04	3.27712	8.92819e-08	2.22093e-06	fam184b	XP_027138806.1	trichohyalin isoform X2 [Larimichthys crocea]	-	-	-	-	-	-	-	-	-	sp|Q9ULE4|F184B_HUMAN	Protein FAM184B OS=Homo sapiens OX=9606 GN=FAM184B PE=2 SV=3
gene22633	619	5.3	1.72	3.16	17.6	16.42	81.51	3.25953	6.50295e-10	2.77788e-08	LOC104938930	XP_010753690.3;XP_027127899.1	olfactomedin-4 [Larimichthys crocea];olfactomedin-4 [Larimichthys crocea]	-	-	-	-	-	-	-	-	-	sp|Q6UX06|OLFM4_HUMAN	Olfactomedin-4 OS=Homo sapiens OX=9606 GN=OLFM4 PE=1 SV=1
gene10979	603	33.22	8.37	7.43	52.19	53.29	314.41	3.25816	1.65452e-06	2.83881e-05	LOC104926498	AGN62118.1;TKS81703.1	hepcidin isoform 2 [Larimichthys crocea];Hepcidin Precursor [Collichthys lucidus]	GO:0050830;GO:0042742;GO:0050832;GO:0005576;GO:0006879;GO:0050829;GO:0005179	defense response to Gram-positive bacterium;defense response to bacterium;defense response to fungus;extracellular region;cellular iron ion homeostasis;defense response to Gram-negative bacterium;hormone activity	K23106	HAMP	http://www.genome.jp/dbget-bin/www_bget?ko:K23106	TGF-beta signaling pathway	ko04350	-	-	sp|A1Z0M0|HEPC_LARCR	Hepcidin OS=Larimichthys crocea OX=215358 GN=hamp PE=1 SV=2
gene13442	1002	4.08	5.39	2.75	31.66	23.87	27.31	3.25815	4.14457e-14	4.22575e-12	exosc6	XP_010741891.3	exosome complex component MTR3 [Larimichthys crocea]	-	-	K12587	MTR3,EXOSC6	http://www.genome.jp/dbget-bin/www_bget?ko:K12587	RNA degradation	ko03018	KOG1068	Exosomal 3'-5' exoribonuclease complex, subunit Rrp41 and related exoribonucleases	sp|Q6P0I8|EXOS6_DANRE	Exosome complex component MTR3 OS=Danio rerio OX=7955 GN=exosc6 PE=2 SV=2
gene17862	2476	1.87	1.6	0.89	9.5	7.46	14.59	3.25455	1.35852e-18	3.43455e-16	slc39a1	KAE8289325.1	Zinc transporter ZIP1 [Larimichthys crocea]	GO:0046873;GO:0016021	metal ion transmembrane transporter activity;integral component of membrane	K14709	SLC39A1_2_3,ZIP1_2_3	http://www.genome.jp/dbget-bin/www_bget?ko:K14709	Alzheimer disease;Parkinson disease	ko05010,ko05012	KOG1558	Fe2+/Zn2+ regulated transporter	sp|Q9NY26|S39A1_HUMAN	Zinc transporter ZIP1 OS=Homo sapiens OX=9606 GN=SLC39A1 PE=1 SV=1
gene16077	1382	0.33	0.31	0.37	1.73	1.68	4.68	3.25435	1.04424e-07	2.54647e-06	gpr84	XP_019127612.2	G-protein coupled receptor 84 [Larimichthys crocea]	GO:0004930;GO:0016021	G protein-coupled receptor activity;integral component of membrane	K08421	GPR84	http://www.genome.jp/dbget-bin/www_bget?ko:K08421	-	-	-	-	sp|Q9NQS5|GPR84_HUMAN	G-protein coupled receptor 84 OS=Homo sapiens OX=9606 GN=GPR84 PE=2 SV=1
gene22083	1298	35.06	44.88	63.74	401.98	264.78	348.05	3.24655	5.68965e-14	5.70715e-12	txnl1	XP_010753032.1	thioredoxin-like protein 1 [Larimichthys crocea]	-	-	-	-	-	-	-	KOG0908	Thioredoxin-like protein	sp|Q8CDN6|TXNL1_MOUSE	Thioredoxin-like protein 1 OS=Mus musculus OX=10090 GN=Txnl1 PE=1 SV=3
gene21553	1550	1.05	3.9	5.98	12.18	41.96	10.11	3.23597	3.19097e-05	0.000358872	arhgef37	TMS17241.1;TKS72785.1	Rho guanine nucleotide exchange factor 37 [Larimichthys crocea];Rho guanine nucleotide exchange factor 37 [Collichthys lucidus]	GO:0005085;GO:0005737	guanyl-nucleotide exchange factor activity;cytoplasm	K20710	ARHGEF37	http://www.genome.jp/dbget-bin/www_bget?ko:K20710	-	-	KOG3519	Invasion-inducing protein TIAM1/CDC24 and related RhoGEF GTPases	sp|A1IGU5|ARH37_HUMAN	Rho guanine nucleotide exchange factor 37 OS=Homo sapiens OX=9606 GN=ARHGEF37 PE=2 SV=2
gene11664	2822	0.16	0.08	0.08	1.26	0.37	0.62	3.23329	5.28289e-05	0.000547652	tlr5	ALJ55566.1	membrane toll-like receptor 5 [Miichthys miiuy]	GO:0002755;GO:0042742;GO:0001819;GO:0006954;GO:0004888;GO:0034146;GO:0045087;GO:0016021	MyD88-dependent toll-like receptor signaling pathway;defense response to bacterium;positive regulation of cytokine production;inflammatory response;transmembrane signaling receptor activity;toll-like receptor 5 signaling pathway;innate immune response;integral component of membrane	K10168	TLR5	http://www.genome.jp/dbget-bin/www_bget?ko:K10168	Inflammatory bowel disease;Legionellosis;Pathogenic Escherichia coli infection;Salmonella infection;Shigellosis;Toll-like receptor signaling pathway	ko05321,ko05134,ko05130,ko05132,ko05131,ko04620	-	-	sp|O60602|TLR5_HUMAN	Toll-like receptor 5 OS=Homo sapiens OX=9606 GN=TLR5 PE=1 SV=4
gene5091	1434	47.41	65.43	42.01	295.42	365.18	357.03	3.22334	3.00048e-16	5.12689e-14	psmc3	XP_028430390.1	26S proteasome regulatory subunit 6A [Perca flavescens]	GO:0005634;GO:0005737;GO:0005524;GO:0008233;GO:0036402;GO:0030163;GO:0000502	nucleus;cytoplasm;ATP binding;peptidase activity;proteasome-activating activity;protein catabolic process;proteasome complex	K03065	PSMC3,RPT5	http://www.genome.jp/dbget-bin/www_bget?ko:K03065	Proteasome;Epstein-Barr virus infection;Alzheimer disease;Amyotrophic lateral sclerosis;Huntington disease;Parkinson disease;Pathways of neurodegeneration - multiple diseases;Prion disease;Spinocerebellar ataxia	ko03050,ko05169,ko05010,ko05014,ko05016,ko05012,ko05022,ko05020,ko05017	KOG0652	26S proteasome regulatory complex, ATPase RPT5	sp|Q63569|PRS6A_RAT	26S proteasome regulatory subunit 6A OS=Rattus norvegicus OX=10116 GN=Psmc3 PE=1 SV=1
gene21230	3217	0.3	0.53	0.28	0.9	4.25	1.18	3.22052	3.53682e-05	0.000391023	megf10	XP_019127710.1	multiple epidermal growth factor-like domains protein 10 [Larimichthys crocea]	GO:0016021	integral component of membrane	K24068	MEGF10_11	http://www.genome.jp/dbget-bin/www_bget?ko:K24068	-	-	KOG1218	Proteins containing Ca2+-binding EGF-like domains	sp|E9QJQ6|MEG10_DANRE	Multiple epidermal growth factor-like domains protein 10 OS=Danio rerio OX=7955 GN=megf10 PE=1 SV=1
gene15262	611	0.18	0.32	0.2	1.05	0.78	3.77	3.2145	0.00734236	0.0329138	tspan13	XP_019109158.1	tetraspanin-13 [Larimichthys crocea]	GO:0016021	integral component of membrane	K17356	TSPAN13_31	http://www.genome.jp/dbget-bin/www_bget?ko:K17356	-	-	-	-	sp|O95857|TSN13_HUMAN	Tetraspanin-13 OS=Homo sapiens OX=9606 GN=TSPAN13 PE=2 SV=1
gene15143	1779	51.37	62.25	117.89	839.91	297.42	390.12	3.2133	2.82353e-08	7.91354e-07	twf2	XP_018554961.1;XP_013888784.1;XP_010744159.1	PREDICTED: WD repeat-containing protein 82 [Lates calcarifer];PREDICTED: twinfilin-2-like [Austrofundulus limnaeus];twinfilin-2 [Larimichthys crocea]	GO:0030837;GO:0005856;GO:0048188;GO:0003779	negative regulation of actin filament polymerization;cytoskeleton;Set1C/COMPASS complex;actin binding	K14962;K08870	WDR82,SWD2,CPS35;TWF	http://www.genome.jp/dbget-bin/www_bget?ko:K14962;http://www.genome.jp/dbget-bin/www_bget?ko:K08870	mRNA surveillance pathway	ko03015	KOG1446;KOG1747	Histone H3 (Lys4) methyltransferase complex and RNA cleavage factor II complex, subunit SWD2;Protein tyrosine kinase 9/actin monomer-binding protein	sp|Q6GMH3|TWF2_DANRE;sp|Q6NV31|WDR82_DANRE	Twinfilin-2 OS=Danio rerio OX=7955 GN=twf2 PE=2 SV=1;WD repeat-containing protein 82 OS=Danio rerio OX=7955 GN=wdr82 PE=2 SV=1
gene8745	1733	1.38	1.25	1.47	3.78	9.73	16.05	3.20469	9.22933e-10	3.7796e-08	ptx3	KAE8295469.1	Pentraxin-related protein PTX3 [Larimichthys crocea]	GO:0045087	innate immune response	-	-	-	-	-	-	-	sp|P26022|PTX3_HUMAN	Pentraxin-related protein PTX3 OS=Homo sapiens OX=9606 GN=PTX3 PE=1 SV=3
gene21141	1717	0.04	0.41	0.19	1.68	0.69	2.4	3.19597	4.47753e-05	0.000475399	LOC104937336	XP_010751846.2	transmembrane protein 150A [Larimichthys crocea]	GO:0016021	integral component of membrane	K21846	TMEM150	http://www.genome.jp/dbget-bin/www_bget?ko:K21846	-	-	-	-	sp|Q28BP2|T150A_XENTR	Transmembrane protein 150A OS=Xenopus tropicalis OX=8364 GN=tmem150a PE=2 SV=1
gene2302	5152	10.13	10.63	18.29	141.87	64.17	48.01	3.19401	4.07294e-08	1.09093e-06	psme4	XP_010754934.3;XP_010754928.3;XP_010754940.3	proteasome activator complex subunit 4 isoform X3 [Larimichthys crocea];proteasome activator complex subunit 4 isoform X2 [Larimichthys crocea];proteasome activator complex subunit 4 isoform X4 [Larimichthys crocea]	GO:0016504;GO:0006281;GO:0000502;GO:0070628;GO:0070577	peptidase activator activity;DNA repair;proteasome complex;proteasome binding;lysine-acetylated histone binding	K06699	PSME4	http://www.genome.jp/dbget-bin/www_bget?ko:K06699	Proteasome	ko03050	-	-	sp|F1R2X6|PSM4B_DANRE;sp|F1QFR9|PSM4A_DANRE	Proteasome activator complex subunit 4B OS=Danio rerio OX=7955 GN=psme4b PE=3 SV=2;Proteasome activator complex subunit 4A OS=Danio rerio OX=7955 GN=psme4a PE=3 SV=2
gene682	1608	13.92	10.44	14.18	110.84	19.27	177.07	3.19119	1.01794e-08	3.2169e-07	dusp5	KAE8300777.1	Dual specificity protein phosphatase 5 [Larimichthys crocea]	GO:0005634;GO:0106307;GO:0004725;GO:0017017;GO:0106306	nucleus;protein threonine phosphatase activity;protein tyrosine phosphatase activity;MAP kinase tyrosine/serine/threonine phosphatase activity;protein serine phosphatase activity	K04459	DUSP,MKP	http://www.genome.jp/dbget-bin/www_bget?ko:K04459	MAPK signaling pathway;Axon regeneration	ko04010,ko04361	-	-	sp|Q16690|DUS5_HUMAN	Dual specificity protein phosphatase 5 OS=Homo sapiens OX=9606 GN=DUSP5 PE=1 SV=2
gene9407	1481	2.41	2.64	2.63	25.9	10.97	13.28	3.18999	1.72013e-10	8.27533e-09	egln3	TMS21177.1;XP_010736587.1	Egl nine-like protein 1 [Larimichthys crocea];egl nine homolog 3 isoform X2 [Larimichthys crocea]	GO:0051213;GO:0016705;GO:0005506;GO:0031418	dioxygenase activity;oxidoreductase activity, acting on paired donors, with incorporation or reduction of molecular oxygen;iron ion binding;L-ascorbic acid binding	K09592	EGLN,HPH	http://www.genome.jp/dbget-bin/www_bget?ko:K09592	HIF-1 signaling pathway;Pathways in cancer;Renal cell carcinoma	ko04066,ko05200,ko05211	-	-	sp|Q9H6Z9|EGLN3_HUMAN;sp|P59722|EGLN1_RAT	Prolyl hydroxylase EGLN3 OS=Homo sapiens OX=9606 GN=EGLN3 PE=1 SV=1;Egl nine homolog 1 (Fragment) OS=Rattus norvegicus OX=10116 GN=Egln1 PE=2 SV=2
gene11665	2145	8.84	11.92	16.37	86.8	82.2	71	3.17592	1.50201e-11	9.23418e-10	LOC104927237	XP_010739571.3	thrombomodulin-like [Larimichthys crocea]	GO:0004888;GO:0016021;GO:0005509	transmembrane signaling receptor activity;integral component of membrane;calcium ion binding	K03907	THBD,CD141	http://www.genome.jp/dbget-bin/www_bget?ko:K03907	Fluid shear stress and atherosclerosis;AGE-RAGE signaling pathway in diabetic complications;Complement and coagulation cascades	ko05418,ko04933,ko04610	-	-	sp|P07204|TRBM_HUMAN	Thrombomodulin OS=Homo sapiens OX=9606 GN=THBD PE=1 SV=2
gene10678	1126	30.86	2.02	1.62	91.65	36.68	107.7	3.17494	0.00029119	0.00229661	LOC104926170	-	-	-	-	-	-	-	-	-	-	-	-	-
gene16277	2288	10.25	21.7	31.12	275.11	63.26	74.66	3.17395	2.74254e-06	4.42666e-05	lmod3	XP_019112448.2	leiomodin-3 [Larimichthys crocea]	GO:0003785;GO:0051694;GO:0005523;GO:0005856	actin monomer binding;pointed-end actin filament capping;tropomyosin binding;cytoskeleton	K22030	LMOD	http://www.genome.jp/dbget-bin/www_bget?ko:K22030	-	-	-	-	sp|E7F7X0|LMOD3_DANRE	Leiomodin-3 OS=Danio rerio OX=7955 GN=lmod3 PE=1 SV=1
gene17513	2784	0.17	0.15	0.28	0.99	0.19	4.01	3.17381	0.000136462	0.00121837	hspa4l	KAE8289901.1	Heat shock 70 kDa protein 4L Heat shock 70-related protein APG-1 Osmotic stress protein 94 [Larimichthys crocea]	GO:0005524;GO:0016887	ATP binding;ATP hydrolysis activity	K09485	HSP110	http://www.genome.jp/dbget-bin/www_bget?ko:K09485	Protein processing in endoplasmic reticulum	ko04141	KOG0103	Molecular chaperones HSP105/HSP110/SSE1, HSP70 superfamily	sp|O95757|HS74L_HUMAN	Heat shock 70 kDa protein 4L OS=Homo sapiens OX=9606 GN=HSPA4L PE=1 SV=3
gene19807	1405	19.83	23.52	27.03	168.19	144.2	141.89	3.17327	2.07248e-14	2.25209e-12	uchl5	XP_019122468.1	ubiquitin carboxyl-terminal hydrolase isozyme L5 [Larimichthys crocea]	GO:1904888;GO:0031011;GO:0004843;GO:0070628;GO:0016579;GO:0006511	cranial skeletal system development;Ino80 complex;thiol-dependent deubiquitinase;proteasome binding;protein deubiquitination;ubiquitin-dependent protein catabolic process	K05610	UCHL5,UCH37	http://www.genome.jp/dbget-bin/www_bget?ko:K05610	-	-	KOG2778	Ubiquitin C-terminal hydrolase	sp|Q06AT3|UCHL5_PIG	Ubiquitin carboxyl-terminal hydrolase isozyme L5 OS=Sus scrofa OX=9823 GN=UCHL5 PE=2 SV=1
gene4886	2656	0.32	0.42	0.49	1.14	1.55	5.97	3.16619	4.03905e-08	1.0842e-06	slc52a3	XP_010730356.2	solute carrier family 52, riboflavin transporter, member 3 [Larimichthys crocea]	GO:0005887;GO:0032217	integral component of plasma membrane;riboflavin transmembrane transporter activity	K14620	SLC52A3,RFT2	http://www.genome.jp/dbget-bin/www_bget?ko:K14620	Vitamin digestion and absorption	ko04977	KOG4255	Uncharacterized conserved protein	sp|B0S5Y3|S5A3A_DANRE	Solute carrier family 52, riboflavin transporter, member 3-A OS=Danio rerio OX=7955 GN=slc52a3a PE=2 SV=1
gene4971	3210	0.18	0.37	0.28	1.42	2.25	1.35	3.15967	4.10678e-07	8.47766e-06	LOC104920025	XP_010730480.3;XP_010730479.3	protocadherin alpha-C2-like isoform X3 [Larimichthys crocea];protocadherin alpha-C2-like isoform X1 [Larimichthys crocea]	GO:0016021;GO:0005886;GO:0007399;GO:0005509;GO:0007156	integral component of membrane;plasma membrane;nervous system development;calcium ion binding;homophilic cell adhesion via plasma membrane adhesion molecules	-	-	-	-	-	-	-	sp|Q9Y5I4|PCDC2_HUMAN	Protocadherin alpha-C2 OS=Homo sapiens OX=9606 GN=PCDHAC2 PE=2 SV=1
novel.11088	7866	4.25	2.41	5.66	39.74	17.16	25.88	3.15927	4.4756e-10	1.9908e-08	CEFIP	XP_019108784.2	cardiac-enriched FHL2-interacting protein [Larimichthys crocea]	-	-	-	-	-	-	-	-	-	sp|Q711Q0|CEFIP_HUMAN	Cardiac-enriched FHL2-interacting protein OS=Homo sapiens OX=9606 GN=CEFIP PE=1 SV=2
gene20323	1393	36.73	58.49	63.17	447.92	246.25	348.68	3.15723	2.8613e-13	2.51388e-11	psmd13	KAE8297674.1	26S proteasome non-ATPase regulatory subunit 13 [Larimichthys crocea]	GO:0000502	proteasome complex	K03039	PSMD13,RPN9	http://www.genome.jp/dbget-bin/www_bget?ko:K03039	Proteasome;Epstein-Barr virus infection;Alzheimer disease;Amyotrophic lateral sclerosis;Huntington disease;Parkinson disease;Pathways of neurodegeneration - multiple diseases;Prion disease;Spinocerebellar ataxia	ko03050,ko05169,ko05010,ko05014,ko05016,ko05012,ko05022,ko05020,ko05017	KOG2908	26S proteasome regulatory complex, subunit RPN9/PSMD13	sp|P84169|PSD13_CHICK	26S proteasome non-ATPase regulatory subunit 13 OS=Gallus gallus OX=9031 GN=PSMD13 PE=1 SV=1
gene11971	1723	0.12	0.63	0.24	1.32	2.17	3.2	3.15479	5.09562e-06	7.43078e-05	LOC104927570	XP_010739985.2	lanosterol 14-alpha demethylase [Larimichthys crocea]	GO:0016705;GO:0005506;GO:0004497;GO:0008168;GO:0032259;GO:0016021;GO:0020037	oxidoreductase activity, acting on paired donors, with incorporation or reduction of molecular oxygen;iron ion binding;monooxygenase activity;methyltransferase activity;methylation;integral component of membrane;heme binding	K05917	CYP51	http://www.genome.jp/dbget-bin/www_bget?ko:K05917	Steroid biosynthesis	ko00100	KOG0684	Cytochrome P450	sp|O46420|CP51A_PIG	Lanosterol 14-alpha demethylase OS=Sus scrofa OX=9823 GN=CYP51A1 PE=2 SV=1
gene136	1353	7.52	6.36	3.45	46.9	17.83	55.54	3.15174	1.73238e-13	1.57799e-11	ascc1	TKS89731.1	Activating signal cointegrator 1 complex subunit 1 ASC-1 complex subunit p50 [Collichthys lucidus]	GO:0007409;GO:0005634;GO:0007528;GO:0061055;GO:0001966;GO:0003723	axonogenesis;nucleus;neuromuscular junction development;myotome development;thigmotaxis;RNA binding	K18666	ASCC1	http://www.genome.jp/dbget-bin/www_bget?ko:K18666	-	-	KOG2814	Transcription coactivator complex, P50 component (LigT RNA ligase/phosphodiesterase family)	sp|Q9D8Z1|ASCC1_MOUSE	Activating signal cointegrator 1 complex subunit 1 OS=Mus musculus OX=10090 GN=Ascc1 PE=1 SV=1
gene5956	911	19.95	12.65	22.06	136.38	88.57	141.9	3.15069	6.22995e-15	8.03997e-13	gadd45g	KAF1389299.1	hypothetical protein PFLUV_G00071990 [Perca fluviatilis]	GO:0051726;GO:0005634	regulation of cell cycle;nucleus	K04402	GADD45	http://www.genome.jp/dbget-bin/www_bget?ko:K04402	Apoptosis;Cell cycle;Cellular senescence;p53 signaling pathway;FoxO signaling pathway;MAPK signaling pathway;NF-kappa B signaling pathway;Pathways in cancer;Transcriptional misregulation in cancer;Basal cell carcinoma;Breast cancer;Chronic myeloid leukemia;Colorectal cancer;Endometrial cancer;Gastric cancer;Glioma;Hepatocellular carcinoma;Melanoma;Non-small cell lung cancer;Pancreatic cancer;Smal…	ko04210,ko04110,ko04218,ko04115,ko04068,ko04010,ko04064,ko05200,ko05202,ko05217,ko05224,ko05220,ko05210,ko05213,ko05226,ko05214,ko05225,ko05218,ko05223,ko05212,ko05222,ko05216,ko05169	-	-	sp|Q2KIX1|GA45G_BOVIN	Growth arrest and DNA damage-inducible protein GADD45 gamma OS=Bos taurus OX=9913 GN=GADD45G PE=2 SV=1
novel.3363	261	0	13.72	21.75	48.73	99.65	35.79	3.14884	0.00316733	0.0167068	-	XP_029912676.1	proteasomal ubiquitin receptor ADRM1-like isoform X3 [Myripristis murdjan]	GO:0000502;GO:0005634;GO:0005737	proteasome complex;nucleus;cytoplasm	K06691	RPN13	http://www.genome.jp/dbget-bin/www_bget?ko:K06691	Proteasome;Epstein-Barr virus infection;Alzheimer disease;Amyotrophic lateral sclerosis;Huntington disease;Parkinson disease;Pathways of neurodegeneration - multiple diseases;Prion disease;Spinocerebellar ataxia	ko03050,ko05169,ko05010,ko05014,ko05016,ko05012,ko05022,ko05020,ko05017	-	-	-	-
gene5762	2777	12.06	29.73	29.88	189.19	112.29	179.49	3.14852	1.83453e-11	1.09524e-09	psmd2	XP_010731586.1	26S proteasome non-ATPase regulatory subunit 2 [Larimichthys crocea]	GO:0030234;GO:0042176;GO:0008540	enzyme regulator activity;regulation of protein catabolic process;proteasome regulatory particle, base subcomplex	K03028	PSMD2,RPN1	http://www.genome.jp/dbget-bin/www_bget?ko:K03028	Proteasome;Epstein-Barr virus infection;Alzheimer disease;Amyotrophic lateral sclerosis;Huntington disease;Parkinson disease;Pathways of neurodegeneration - multiple diseases;Prion disease;Spinocerebellar ataxia	ko03050,ko05169,ko05010,ko05014,ko05016,ko05012,ko05022,ko05020,ko05017	KOG2005	26S proteasome regulatory complex, subunit RPN1/PSMD2	sp|P56701|PSMD2_BOVIN	26S proteasome non-ATPase regulatory subunit 2 OS=Bos taurus OX=9913 GN=PSMD2 PE=1 SV=2
novel.12643	1268	0.19	0.15	0	0.42	0.27	1.62	3.14643	0.00840322	0.0366546	CEP164	XP_027136110.1	centrosomal protein of 164 kDa [Larimichthys crocea]	-	-	K16462	CEP164	http://www.genome.jp/dbget-bin/www_bget?ko:K16462	-	-	-	-	sp|Q9UPV0|CE164_HUMAN	Centrosomal protein of 164 kDa OS=Homo sapiens OX=9606 GN=CEP164 PE=1 SV=3
gene15314	2505	5.13	6.92	3.65	45.09	29.24	26.96	3.13558	8.54727e-13	6.78741e-11	gda	KAE8292340.1;TMS03507.1	Guanine deaminase [Larimichthys crocea];Guanine deaminase [Larimichthys crocea]	GO:0006147;GO:0008892;GO:0008270	guanine catabolic process;guanine deaminase activity;zinc ion binding	K01487	guaD,GDA	http://www.genome.jp/dbget-bin/www_bget?ko:K01487	Purine metabolism	ko00230	KOG3968	Atrazine chlorohydrolase/guanine deaminase	sp|Q9Y2T3|GUAD_HUMAN	Guanine deaminase OS=Homo sapiens OX=9606 GN=GDA PE=1 SV=1
gene22636	1413	1.68	1.8	1.43	8.81	5.18	22.36	3.13556	1.34229e-12	1.00777e-10	LOC104938932	XP_027127899.1	olfactomedin-4 [Larimichthys crocea]	-	-	-	-	-	-	-	-	-	sp|Q6UX06|OLFM4_HUMAN	Olfactomedin-4 OS=Homo sapiens OX=9606 GN=OLFM4 PE=1 SV=1
gene8405	4753	0.04	0.02	0.12	0.9	0.14	0.13	3.13282	0.0028985	0.0155575	LOC104923744	-	-	-	-	-	-	-	-	-	-	-	-	-
gene14693	1492	0.05	0.04	0.11	0.47	0.34	0.5	3.11727	0.0076177	0.0338905	spata6	XP_010743579.3	spermatogenesis-associated protein 6 isoform X1 [Larimichthys crocea]	-	-	K23224	SPATA6	http://www.genome.jp/dbget-bin/www_bget?ko:K23224	-	-	-	-	sp|Q9NWH7|SPAT6_HUMAN	Spermatogenesis-associated protein 6 OS=Homo sapiens OX=9606 GN=SPATA6 PE=1 SV=1
gene17003	3469	0.09	0.15	0.13	0.99	0.67	0.63	3.11524	3.65413e-06	5.63728e-05	caprin2	TMS02626.1	Caprin-2 [Larimichthys crocea]	GO:0003723;GO:0017148;GO:0005737;GO:0030154	RNA binding;negative regulation of translation;cytoplasm;cell differentiation	K18744	CAPRIN2,EEG1	http://www.genome.jp/dbget-bin/www_bget?ko:K18744	-	-	-	-	sp|Q5RJ80|CAPR2_DANRE	Caprin-2 OS=Danio rerio OX=7955 GN=caprin2 PE=1 SV=1
gene10456	1416	16.36	31.81	31.74	181.23	164.02	135.39	3.10977	1.36836e-10	6.75348e-09	psmd8	XP_027136465.1;XP_028429041.1;XP_029302045.1	26S proteasome non-ATPase regulatory subunit 8 [Larimichthys crocea];26S proteasome non-ATPase regulatory subunit 8 [Perca flavescens];26S proteasome non-ATPase regulatory subunit 8 isoform X1 [Cottoperca gobio]	-	-	K03031	PSMD8,RPN12	http://www.genome.jp/dbget-bin/www_bget?ko:K03031	Proteasome;Epstein-Barr virus infection;Alzheimer disease;Amyotrophic lateral sclerosis;Huntington disease;Parkinson disease;Pathways of neurodegeneration - multiple diseases;Prion disease;Spinocerebellar ataxia	ko03050,ko05169,ko05010,ko05014,ko05016,ko05012,ko05022,ko05020,ko05017	KOG3151	26S proteasome regulatory complex, subunit RPN12/PSMD8	sp|Q5RE15|PSMD8_PONAB	26S proteasome non-ATPase regulatory subunit 8 (Fragment) OS=Pongo abelii OX=9601 GN=PSMD8 PE=2 SV=2
gene5934	3534	1.93	1.75	2.04	16.54	7.1	13.73	3.10945	3.88299e-14	3.99191e-12	fam219a	XP_010731794.1;XP_010731795.1	protein FAM219A isoform X1 [Larimichthys crocea];protein FAM219A isoform X2 [Larimichthys crocea]	-	-	-	-	-	-	-	-	-	sp|Q8IW50|F219A_HUMAN	Protein FAM219A OS=Homo sapiens OX=9606 GN=FAM219A PE=1 SV=3
gene15703	2444	5.46	2.16	4.71	33.73	10.93	42.95	3.10922	7.90419e-10	3.30801e-08	efemp2	KAF1384869.1	hypothetical protein PFLUV_G00124660 [Perca fluviatilis]	GO:0048251;GO:0005615;GO:0005509	elastic fiber assembly;extracellular space;calcium ion binding	K19866	EFEMP2	http://www.genome.jp/dbget-bin/www_bget?ko:K19866	-	-	-	-	sp|O95967|FBLN4_HUMAN	EGF-containing fibulin-like extracellular matrix protein 2 OS=Homo sapiens OX=9606 GN=EFEMP2 PE=1 SV=3
gene2450	1520	49.8	74.63	56.84	451.04	269.52	426.92	3.09238	8.09573e-18	1.85722e-15	psmc1	XP_013876370.1	PREDICTED: 26S protease regulatory subunit 4 [Austrofundulus limnaeus]	GO:0000502;GO:0005634;GO:0008233;GO:0036402;GO:0005737;GO:0005524;GO:0030163	proteasome complex;nucleus;peptidase activity;proteasome-activating activity;cytoplasm;ATP binding;protein catabolic process	K03062	PSMC1,RPT2	http://www.genome.jp/dbget-bin/www_bget?ko:K03062	Proteasome;Viral carcinogenesis;Epstein-Barr virus infection;Human papillomavirus infection;Alzheimer disease;Amyotrophic lateral sclerosis;Huntington disease;Parkinson disease;Pathways of neurodegeneration - multiple diseases;Prion disease;Spinocerebellar ataxia	ko03050,ko05203,ko05169,ko05165,ko05010,ko05014,ko05016,ko05012,ko05022,ko05020,ko05017	KOG0726	26S proteasome regulatory complex, ATPase RPT2	sp|P62191|PRS4_HUMAN	26S proteasome regulatory subunit 4 OS=Homo sapiens OX=9606 GN=PSMC1 PE=1 SV=1
gene3170	1568	1.38	1.54	1.97	15.02	6.6	8.72	3.09087	1.59479e-09	6.13547e-08	use1	XP_027146428.1	vesicle transport protein USE1 [Larimichthys crocea]	GO:0016021;GO:0005789;GO:0015031	integral component of membrane;endoplasmic reticulum membrane;protein transport	K08507	USE1	http://www.genome.jp/dbget-bin/www_bget?ko:K08507	SNARE interactions in vesicular transport	ko04130	-	-	sp|Q7ZTY7|USE1_DANRE	Vesicle transport protein USE1 OS=Danio rerio OX=7955 GN=use1 PE=2 SV=1
gene22300	818	0.22	0	0.51	2.82	0.77	0.71	3.08661	0.0117561	0.0479613	slc35f1	TMS11982.1	Solute carrier family 35 member F1 [Larimichthys crocea]	GO:0022857;GO:0016021	transmembrane transporter activity;integral component of membrane	K15287	SLC35F1_2	http://www.genome.jp/dbget-bin/www_bget?ko:K15287	-	-	KOG2766	Predicted membrane protein	sp|Q5T1Q4|S35F1_HUMAN	Solute carrier family 35 member F1 OS=Homo sapiens OX=9606 GN=SLC35F1 PE=1 SV=2
gene2418	895	2.1	1.56	1.89	15.35	8.43	9.67	3.07933	4.65628e-09	1.60674e-07	LOC104940329	XP_010755208.2;TMS11379.1	uncharacterized protein C8orf88 homolog [Larimichthys crocea];Uncharacterized protein E3U43_020372 [Larimichthys crocea]	-	-	-	-	-	-	-	-	-	sp|P0DMB2|CH088_HUMAN	Uncharacterized protein C8orf88 OS=Homo sapiens OX=9606 GN=C8orf88 PE=4 SV=1
novel.1527	1041	0.15	0.14	0.36	2.01	1.36	0.15	3.07868	0.00811159	0.0356208	-	-	-	-	-	-	-	-	-	-	-	-	-	-
gene19347	2339	0.06	0.08	0	0.28	0.15	0.51	3.07575	0.00755246	0.0336788	LOC104935464	XP_027139138.1	RUN domain-containing protein 3A [Larimichthys crocea]	-	-	K24787	RUNDC3	http://www.genome.jp/dbget-bin/www_bget?ko:K24787	-	-	-	-	sp|A7YDW0|RUN3A_DANRE	RUN domain-containing protein 3A OS=Danio rerio OX=7955 GN=rundc3a PE=2 SV=1
gene3052	2786	9.87	8.23	8.07	72.1	21.64	82.33	3.07439	3.45718e-13	2.9845e-11	LOC104917948	TKS70816.1	Tribbles -like protein 2 [Collichthys lucidus]	GO:0005524;GO:0004672;GO:0003714	ATP binding;protein kinase activity;transcription corepressor activity	K19518	TRIB3	http://www.genome.jp/dbget-bin/www_bget?ko:K19518	Insulin resistance	ko04931	KOG0583	Serine/threonine protein kinase	sp|Q8K4K2|TRIB3_MOUSE	Tribbles homolog 3 OS=Mus musculus OX=10090 GN=Trib3 PE=1 SV=2
gene11555	1665	29.59	40.19	40.7	257.98	174.62	263.26	3.07338	1.62763e-17	3.44668e-15	psmd12	XP_027139419.1	26S proteasome non-ATPase regulatory subunit 12 [Larimichthys crocea]	-	-	K03035	PSMD12,RPN5	http://www.genome.jp/dbget-bin/www_bget?ko:K03035	Proteasome;Epstein-Barr virus infection;Alzheimer disease;Amyotrophic lateral sclerosis;Huntington disease;Parkinson disease;Pathways of neurodegeneration - multiple diseases;Prion disease;Spinocerebellar ataxia	ko03050,ko05169,ko05010,ko05014,ko05016,ko05012,ko05022,ko05020,ko05017	KOG1498	26S proteasome regulatory complex, subunit RPN5/PSMD12	sp|Q2KJ25|PSD12_BOVIN	26S proteasome non-ATPase regulatory subunit 12 OS=Bos taurus OX=9913 GN=PSMD12 PE=2 SV=3
gene21184	1266	3.1	3.85	6.23	19.83	21.56	69.31	3.07214	7.42563e-11	3.84086e-09	LOC104937382	XP_019962772.1;XP_010751904.3	PREDICTED: cAMP-responsive element modulator-like [Paralichthys olivaceus];cAMP-responsive element modulator isoform X1 [Larimichthys crocea]	GO:0005634;GO:0003700;GO:0003677	nucleus;DNA-binding transcription factor activity;DNA binding	K09052	CREM	http://www.genome.jp/dbget-bin/www_bget?ko:K09052	Adrenergic signaling in cardiomyocytes	ko04261	KOG3584	cAMP response element binding protein and related transcription factors	sp|P79145|CREM_CANLF	cAMP-responsive element modulator OS=Canis lupus familiaris OX=9615 GN=CREM PE=2 SV=2
gene7587	1905	2.87	5.37	4.32	21.16	15.37	52.52	3.07162	3.04043e-14	3.19193e-12	vtn	XP_010734093.3;XP_010734091.3	vitronectin isoform X2 [Larimichthys crocea];vitronectin isoform X1 [Larimichthys crocea]	GO:0006955;GO:0005044;GO:0030247;GO:0005576	immune response;scavenger receptor activity;polysaccharide binding;extracellular region	K06251	VTN	http://www.genome.jp/dbget-bin/www_bget?ko:K06251	Focal adhesion;PI3K-Akt signaling pathway;ECM-receptor interaction;Proteoglycans in cancer;Human papillomavirus infection;Complement and coagulation cascades	ko04510,ko04151,ko04512,ko05205,ko05165,ko04610	-	-	sp|P04004|VTNC_HUMAN	Vitronectin OS=Homo sapiens OX=9606 GN=VTN PE=1 SV=1
gene14624	1362	68.53	92.8	53.45	549.3	303.31	462.66	3.07152	5.11319e-16	8.22626e-14	psmc5	XP_019127517.2;XP_019127516.2	26S proteasome regulatory subunit 8 isoform X2 [Larimichthys crocea];26S proteasome regulatory subunit 8 isoform X1 [Larimichthys crocea]	GO:0000502;GO:0036402;GO:0005737;GO:0005524;GO:0030163	proteasome complex;proteasome-activating activity;cytoplasm;ATP binding;protein catabolic process	K03066	PSMC5,RPT6	http://www.genome.jp/dbget-bin/www_bget?ko:K03066	Proteasome;Epstein-Barr virus infection;Alzheimer disease;Amyotrophic lateral sclerosis;Huntington disease;Parkinson disease;Pathways of neurodegeneration - multiple diseases;Prion disease;Spinocerebellar ataxia	ko03050,ko05169,ko05010,ko05014,ko05016,ko05012,ko05022,ko05020,ko05017	KOG0728	26S proteasome regulatory complex, ATPase RPT6	sp|P62194|PRS8_BOVIN	26S proteasome regulatory subunit 8 OS=Bos taurus OX=9913 GN=PSMC5 PE=2 SV=1
gene9749	2373	1.9	2.77	1.59	8.43	18.07	5.12	3.06414	2.78035e-06	4.48184e-05	LOC104925196	TKS92666.1;XP_010737067.2	Serpin H1 47 kDa heat shock protein [Collichthys lucidus];serpin H1 [Larimichthys crocea]	GO:0005615;GO:0005581	extracellular space;collagen trimer	K09501	SERPINH1,HSP47	http://www.genome.jp/dbget-bin/www_bget?ko:K09501	-	-	-	-	sp|P50454|SERPH_HUMAN;sp|Q5RBS3|SERPH_PONAB	Serpin H1 OS=Homo sapiens OX=9606 GN=SERPINH1 PE=1 SV=2;Serpin H1 OS=Pongo abelii OX=9601 GN=SERPINH1 PE=2 SV=1
gene22657	1699	6.66	6.56	5.23	24.95	18.78	91.71	3.06055	2.33295e-12	1.68027e-10	serpine1	KAE8278787.1	Plasminogen activator inhibitor 1 [Larimichthys crocea]	GO:0005615	extracellular space	K03982	SERPINE1,PAI1	http://www.genome.jp/dbget-bin/www_bget?ko:K03982	Cellular senescence;p53 signaling pathway;Apelin signaling pathway;HIF-1 signaling pathway;Hippo signaling pathway;AGE-RAGE signaling pathway in diabetic complications;Chagas disease;Complement and coagulation cascades	ko04218,ko04115,ko04371,ko04066,ko04390,ko04933,ko05142,ko04610	-	-	sp|P22777|PAI1_MOUSE	Plasminogen activator inhibitor 1 OS=Mus musculus OX=10090 GN=Serpine1 PE=1 SV=1
gene5933	2369	0	0.21	0.16	0.89	0.5	0.99	3.0596	0.000458876	0.00336364	dnai1	XP_010731793.1	dynein intermediate chain 1, axonemal [Larimichthys crocea]	-	-	K10409	DNAI1	http://www.genome.jp/dbget-bin/www_bget?ko:K10409	Amyotrophic lateral sclerosis;Huntington disease;Pathways of neurodegeneration - multiple diseases	ko05014,ko05016,ko05022	KOG1587	Cytoplasmic dynein intermediate chain	sp|Q16959|DYI2_HELCR	Dynein intermediate chain 2, ciliary OS=Heliocidaris crassispina OX=1043166 PE=2 SV=1
gene12659	3648	1.33	0.98	1.17	7.33	7.84	6.55	3.05598	2.51612e-12	1.79652e-10	nudt3	XP_028432062.1;XP_010740870.1	diphosphoinositol polyphosphate phosphohydrolase 1 isoform X1 [Perca flavescens];diphosphoinositol polyphosphate phosphohydrolase 1 [Larimichthys crocea]	GO:0016787	hydrolase activity	K07766	E3.6.1.52	http://www.genome.jp/dbget-bin/www_bget?ko:K07766	-	-	KOG2839	Diadenosine and diphosphoinositol polyphosphate phosphohydrolase	sp|O95989|NUDT3_HUMAN	Diphosphoinositol polyphosphate phosphohydrolase 1 OS=Homo sapiens OX=9606 GN=NUDT3 PE=1 SV=1
novel.18859	870	0.57	0.32	0.35	2.66	0.53	4.92	3.05384	0.000505881	0.00365521	-	-	-	-	-	-	-	-	-	-	-	-	-	-
gene8755	1395	33.45	43.53	48.57	297.95	183.36	306.73	3.05309	3.27888e-16	5.45219e-14	psmd6	XP_027134825.1	26S proteasome non-ATPase regulatory subunit 6 isoform X1 [Larimichthys crocea]	GO:0030234;GO:0000502	enzyme regulator activity;proteasome complex	K03037	PSMD6,RPN7	http://www.genome.jp/dbget-bin/www_bget?ko:K03037	Proteasome;Epstein-Barr virus infection;Alzheimer disease;Amyotrophic lateral sclerosis;Huntington disease;Parkinson disease;Pathways of neurodegeneration - multiple diseases;Prion disease;Spinocerebellar ataxia	ko03050,ko05169,ko05010,ko05014,ko05016,ko05012,ko05022,ko05020,ko05017	KOG0687	26S proteasome regulatory complex, subunit RPN7/PSMD6	sp|Q15008|PSMD6_HUMAN	26S proteasome non-ATPase regulatory subunit 6 OS=Homo sapiens OX=9606 GN=PSMD6 PE=1 SV=1
gene1327	2188	12.82	11.7	26.24	135.55	80.29	95.3	3.04535	2.47218e-09	9.06076e-08	cops3	XP_010741951.1	COP9 signalosome complex subunit 3 isoform X1 [Larimichthys crocea]	GO:0008180;GO:0005737	COP9 signalosome;cytoplasm	K12177	COPS3,CSN3	http://www.genome.jp/dbget-bin/www_bget?ko:K12177	-	-	KOG2582	COP9 signalosome, subunit CSN3	sp|Q6P2U9|CSN3_DANRE	COP9 signalosome complex subunit 3 OS=Danio rerio OX=7955 GN=cops3 PE=2 SV=1
gene17502	3820	7.08	10.33	20.01	142.91	30.5	60.67	3.04231	1.61728e-06	2.78648e-05	LOC104933467	KAE8292479.1;XP_019115041.1	Serine/threonine-protein kinase ULK1 [Larimichthys crocea];serine/threonine-protein kinase ULK1 isoform X3 [Larimichthys crocea]	GO:0005524;GO:0106310;GO:0106311	ATP binding;protein serine kinase activity;protein serine/threonine kinase activity	K21357	ULK1	http://www.genome.jp/dbget-bin/www_bget?ko:K21357	Autophagy - animal;Mitophagy - animal;AMPK signaling pathway;mTOR signaling pathway;Alzheimer disease;Amyotrophic lateral sclerosis;Huntington disease;Pathways of neurodegeneration - multiple diseases;Spinocerebellar ataxia;Longevity regulating pathway	ko04140,ko04137,ko04152,ko04150,ko05010,ko05014,ko05016,ko05022,ko05017,ko04211	KOG0595	Serine/threonine-protein kinase involved in autophagy	sp|O75385|ULK1_HUMAN	Serine/threonine-protein kinase ULK1 OS=Homo sapiens OX=9606 GN=ULK1 PE=1 SV=2
novel.3298	2574	0.55	0.26	0.39	2.79	0.72	4.79	3.03758	5.91986e-07	1.15762e-05	-	TKS90104.1	Chromobox protein -like protein 7 [Collichthys lucidus]	GO:0035102	PRC1 complex	-	-	-	-	-	-	-	-	-
gene5944	2066	0.13	0.54	0.15	3.66	0.26	0.94	3.03545	0.00152323	0.00916232	dusp4	XP_010731811.1	dual specificity protein phosphatase 4 [Larimichthys crocea]	GO:0017017;GO:0005634;GO:0106306;GO:0004725;GO:0106307	MAP kinase tyrosine/serine/threonine phosphatase activity;nucleus;protein serine phosphatase activity;protein tyrosine phosphatase activity;protein threonine phosphatase activity	K04459	DUSP,MKP	http://www.genome.jp/dbget-bin/www_bget?ko:K04459	MAPK signaling pathway;Axon regeneration	ko04010,ko04361	-	-	sp|Q62767|DUS4_RAT	Dual specificity protein phosphatase 4 OS=Rattus norvegicus OX=10116 GN=Dusp4 PE=1 SV=1
gene10824	2220	0.37	0.72	0.27	2.29	1.42	4	3.033	1.03717e-07	2.53172e-06	tm7sf2	KAE8287950.1	Delta(14)-sterol reductase [Larimichthys crocea]	GO:0006695;GO:0016021;GO:0016628	cholesterol biosynthetic process;integral component of membrane;oxidoreductase activity, acting on the CH-CH group of donors, NAD or NADP as acceptor	K00222	TM7SF2,ERG24	http://www.genome.jp/dbget-bin/www_bget?ko:K00222	Steroid biosynthesis	ko00100	KOG1435	Sterol reductase/lamin B receptor	sp|Q8WMV1|ERG24_BOVIN	Delta(14)-sterol reductase TM7SF2 OS=Bos taurus OX=9913 GN=TM7SF2 PE=1 SV=1
gene19657	3046	0.06	0.06	0.02	0.09	0.06	1.05	3.03241	0.0104964	0.0438438	LOC104935793	XP_027133716.1	leucine-rich repeat LGI family member 2 [Larimichthys crocea]	GO:0005576	extracellular region	K25429	LGI2	http://www.genome.jp/dbget-bin/www_bget?ko:K25429	-	-	-	-	sp|Q8N0V4|LGI2_HUMAN	Leucine-rich repeat LGI family member 2 OS=Homo sapiens OX=9606 GN=LGI2 PE=2 SV=1
novel.12997	725	0.26	0.24	0.3	2.04	1.28	1.35	3.02994	0.00288716	0.0155067	-	-	-	-	-	-	-	-	-	-	-	-	-	-
gene3168	1761	4.75	1.41	3.39	18.36	10.28	36.24	3.02474	2.34275e-09	8.65039e-08	LOC104918075	TKS74613.1	Sphingosine 1-phosphate receptor 4 [Collichthys lucidus]	GO:0016021;GO:0005886;GO:0038036	integral component of membrane;plasma membrane;sphingosine-1-phosphate receptor activity	K04293	S1PR4,EDG6	http://www.genome.jp/dbget-bin/www_bget?ko:K04293	FoxO signaling pathway;Sphingolipid signaling pathway;Neuroactive ligand-receptor interaction	ko04068,ko04071,ko04080	-	-	sp|P21453|S1PR1_HUMAN	Sphingosine 1-phosphate receptor 1 OS=Homo sapiens OX=9606 GN=S1PR1 PE=1 SV=2
gene8185	2569	31.49	52.43	34.91	216.52	140.73	231.81	3.02455	1.08417e-15	1.61815e-13	psmd1	XP_019110551.1;TMS20212.1	26S proteasome non-ATPase regulatory subunit 1 [Larimichthys crocea];26S proteasome non-ATPase regulatory subunit 1 [Larimichthys crocea]	GO:0030234;GO:0042176;GO:0008540;GO:0016021	enzyme regulator activity;regulation of protein catabolic process;proteasome regulatory particle, base subcomplex;integral component of membrane	K03032	PSMD1,RPN2	http://www.genome.jp/dbget-bin/www_bget?ko:K03032	Proteasome;Epstein-Barr virus infection;Alzheimer disease;Amyotrophic lateral sclerosis;Huntington disease;Parkinson disease;Pathways of neurodegeneration - multiple diseases;Prion disease;Spinocerebellar ataxia	ko03050,ko05169,ko05010,ko05014,ko05016,ko05012,ko05022,ko05020,ko05017	KOG2062	26S proteasome regulatory complex, subunit RPN2/PSMD1	sp|Q3TXS7|PSMD1_MOUSE	26S proteasome non-ATPase regulatory subunit 1 OS=Mus musculus OX=10090 GN=Psmd1 PE=1 SV=1
gene3763	1428	4.66	6.31	5.94	59.4	15.1	41.06	3.02439	2.56875e-10	1.19456e-08	zfand2a	XP_010728863.2;XP_010728861.2	AN1-type zinc finger protein 2A isoform X2 [Larimichthys crocea];AN1-type zinc finger protein 2A isoform X1 [Larimichthys crocea]	GO:0008270	zinc ion binding	K24685	ZFAND2	http://www.genome.jp/dbget-bin/www_bget?ko:K24685	-	-	KOG3183	Predicted Zn-finger protein	sp|Q8WV99|ZFN2B_HUMAN	AN1-type zinc finger protein 2B OS=Homo sapiens OX=9606 GN=ZFAND2B PE=1 SV=1
gene16711	799	0.41	0.91	1.04	4.92	4.05	5.39	3.02425	1.83679e-06	3.11274e-05	LOC104932646	-	-	-	-	-	-	-	-	-	-	-	-	-
gene260	868	0.3	1.36	0.23	3.97	1.59	7.11	3.0229	0.000103573	0.000965802	pxk	XP_019123889.1	PX domain-containing protein kinase-like protein isoform X3 [Larimichthys crocea]	GO:0004672;GO:0005524;GO:0003779;GO:0035091	protein kinase activity;ATP binding;actin binding;phosphatidylinositol binding	K17543	PXK	http://www.genome.jp/dbget-bin/www_bget?ko:K17543	-	-	KOG2101	Intermediate filament-like protein, sorting nexins, and related proteins containing PX (PhoX) domain(s)	sp|Q7Z7A4|PXK_HUMAN	PX domain-containing protein kinase-like protein OS=Homo sapiens OX=9606 GN=PXK PE=1 SV=1
gene12918	1116	0.42	0.38	0.49	1.95	2.98	2.38	3.01649	1.54692e-05	0.000193666	LOC104928583	XP_010741196.1	V-set and transmembrane domain-containing protein 4 [Larimichthys crocea]	GO:0016021;GO:0005886	integral component of membrane;plasma membrane	-	-	-	-	-	-	-	sp|T1NXB5|VSTM4_MOUSE	V-set and transmembrane domain-containing protein 4 OS=Mus musculus OX=10090 GN=Vstm4 PE=1 SV=1
gene5722	3791	0.17	0.38	0.49	1.99	2.31	1.55	3.01581	8.93548e-07	1.65336e-05	klhl29	KAE8287042.1	Kelch-like protein 29 Kelch repeat and BTB domain-containing protein 9 [Larimichthys crocea]	-	-	K10465	KLHL29,KBTBD9	http://www.genome.jp/dbget-bin/www_bget?ko:K10465	-	-	-	-	sp|Q96CT2|KLH29_HUMAN	Kelch-like protein 29 OS=Homo sapiens OX=9606 GN=KLHL29 PE=1 SV=3
gene11379	357	0.7	0.62	1.57	6.15	4.25	6.17	3.01404	0.0112071	0.0462391	LOC104926928	-	-	-	-	-	-	-	-	-	-	-	-	-
gene7120	3334	0.21	0.3	0.2	0.78	1.22	2.64	3.01159	3.85914e-08	1.04268e-06	ppp1r16a	XP_010733469.1	protein phosphatase 1 regulatory subunit 16A [Larimichthys crocea]	-	-	K17458	PPP1R16A,MYPT3	http://www.genome.jp/dbget-bin/www_bget?ko:K17458	-	-	KOG0505	Myosin phosphatase, regulatory subunit	sp|Q923M0|PP16A_MOUSE	Protein phosphatase 1 regulatory subunit 16A OS=Mus musculus OX=10090 GN=Ppp1r16a PE=1 SV=1
gene14528	1610	27.78	34.99	29.74	218.53	130.99	196.49	3.01043	3.91636e-17	7.76254e-15	psmc4	XP_026172665.1;XP_018974210.1;TNN67754.1	26S proteasome regulatory subunit 6B isoform X1 [Mastacembelus armatus];PREDICTED: 26S protease regulatory subunit 6B [Cyprinus carpio];26S protease regulatory subunit 6B [Liparis tanakae]	GO:0030163;GO:0005524;GO:0005737;GO:0036402;GO:0008233;GO:0016887;GO:0000502	protein catabolic process;ATP binding;cytoplasm;proteasome-activating activity;peptidase activity;ATP hydrolysis activity;proteasome complex	K03063	PSMC4,RPT3	http://www.genome.jp/dbget-bin/www_bget?ko:K03063	Proteasome;Epstein-Barr virus infection;Alzheimer disease;Amyotrophic lateral sclerosis;Huntington disease;Parkinson disease;Pathways of neurodegeneration - multiple diseases;Prion disease;Spinocerebellar ataxia	ko03050,ko05169,ko05010,ko05014,ko05016,ko05012,ko05022,ko05020,ko05017	KOG0727	26S proteasome regulatory complex, ATPase RPT3	sp|Q3T030|PRS6B_BOVIN	26S proteasome regulatory subunit 6B OS=Bos taurus OX=9913 GN=PSMC4 PE=2 SV=1
gene8420	1665	30.57	54.41	41.3	223.6	253.85	241.36	3.00841	1.02956e-12	7.99638e-11	psmc2	XP_010735237.1	26S proteasome regulatory subunit 7 [Larimichthys crocea]	GO:0036402;GO:0008233;GO:0005524;GO:0005737;GO:0030163;GO:0000502	proteasome-activating activity;peptidase activity;ATP binding;cytoplasm;protein catabolic process;proteasome complex	K03061	PSMC2,RPT1	http://www.genome.jp/dbget-bin/www_bget?ko:K03061	Proteasome;Epstein-Barr virus infection;Alzheimer disease;Amyotrophic lateral sclerosis;Huntington disease;Parkinson disease;Pathways of neurodegeneration - multiple diseases;Prion disease;Spinocerebellar ataxia	ko03050,ko05169,ko05010,ko05014,ko05016,ko05012,ko05022,ko05020,ko05017	KOG0729	26S proteasome regulatory complex, ATPase RPT1	sp|P46471|PRS7_MOUSE	26S proteasome regulatory subunit 7 OS=Mus musculus OX=10090 GN=Psmc2 PE=1 SV=5
gene9286	1465	1.05	0.41	1.1	4.07	1.67	13.04	3.00671	3.88896e-06	5.94038e-05	LOC104924692	XP_010736419.2	thyroxine 5-deiodinase-like [Larimichthys crocea]	GO:0042446;GO:0033798;GO:0005886;GO:0016021;GO:0010008;GO:0004800	hormone biosynthetic process;thyroxine 5-deiodinase activity;plasma membrane;integral component of membrane;endosome membrane;thyroxine 5'-deiodinase activity	K07754	DIO3	http://www.genome.jp/dbget-bin/www_bget?ko:K07754	Thyroid hormone signaling pathway	ko04919	-	-	sp|A7YD35|IOD3_SPAAU	Thyroxine 5-deiodinase OS=Sparus aurata OX=8175 GN=dio3 PE=2 SV=2
gene15348	1221	38.29	52.89	30.74	288.3	166.84	261.67	3.00603	3.20497e-16	5.4018e-14	psmb5	XP_010744420.2	proteasome subunit beta type-5 [Larimichthys crocea]	GO:0004298;GO:0005634;GO:0005737;GO:0043161;GO:0005839	threonine-type endopeptidase activity;nucleus;cytoplasm;proteasome-mediated ubiquitin-dependent protein catabolic process;proteasome core complex	K02737	PSMB5	http://www.genome.jp/dbget-bin/www_bget?ko:K02737	Proteasome;Alzheimer disease;Amyotrophic lateral sclerosis;Huntington disease;Parkinson disease;Pathways of neurodegeneration - multiple diseases;Prion disease;Spinocerebellar ataxia	ko03050,ko05010,ko05014,ko05016,ko05012,ko05022,ko05020,ko05017	KOG0175	20S proteasome, regulatory subunit beta type PSMB5/PSMB8/PRE2	sp|O55234|PSB5_MOUSE	Proteasome subunit beta type-5 OS=Mus musculus OX=10090 GN=Psmb5 PE=1 SV=3
gene8259	2438	0.08	0.02	0.03	0.31	0.1	0.52	3.00521	0.00834538	0.0364601	LOC104923585	XP_010735027.2	solute carrier family 22 member 5-like [Larimichthys crocea]	GO:0016021;GO:0022857	integral component of membrane;transmembrane transporter activity	K08202	SLC22A4_5,OCTN	http://www.genome.jp/dbget-bin/www_bget?ko:K08202	Choline metabolism in cancer	ko05231	-	-	sp|O70594|S22A5_RAT	Solute carrier family 22 member 5 OS=Rattus norvegicus OX=10116 GN=Slc22a5 PE=1 SV=1
gene18660	2280	1.15	0.94	1.1	7.91	3.84	7.81	3.0044	9.02117e-13	7.09551e-11	leprotl1	XP_029297093.1	leptin receptor overlapping transcript-like 1 isoform X2 [Cottoperca gobio]	GO:0016021	integral component of membrane	-	-	-	-	-	KOG2174	Leptin receptor gene-related protein	sp|O95214|LERL1_HUMAN	Leptin receptor overlapping transcript-like 1 OS=Homo sapiens OX=9606 GN=LEPROTL1 PE=1 SV=2
gene2953	7354	6.17	4.84	10.17	55.52	34.99	31.7	3.00363	5.86263e-09	1.98432e-07	alpk3	XP_010727749.3	titin homolog isoform X2 [Larimichthys crocea]	GO:0005886;GO:0005524;GO:0016021;GO:0004674	plasma membrane;ATP binding;integral component of membrane;protein serine/threonine kinase activity	K08868	ALPK	http://www.genome.jp/dbget-bin/www_bget?ko:K08868	-	-	-	-	sp|Q924C5|ALPK3_MOUSE	Alpha-protein kinase 3 OS=Mus musculus OX=10090 GN=Alpk3 PE=1 SV=1
gene3856	1817	7.07	4.22	4.61	30.51	18.9	52.91	3.0024	6.6682e-17	1.26116e-14	narfl	XP_010728988.3	cytosolic iron-sulfur assembly component 3 [Larimichthys crocea]	-	-	-	-	-	-	-	KOG2439	Nuclear architecture related protein	sp|A8WH18|NARFL_XENTR	Cytosolic Fe-S cluster assembly factor narfl OS=Xenopus tropicalis OX=8364 GN=narfl PE=2 SV=1
gene20605	1175	1.12	0.86	0.3	3.93	2.46	8.29	3.00194	1.17014e-07	2.79839e-06	LOC104936769	XP_019124068.2	uncharacterized protein LOC104936769 [Larimichthys crocea]	GO:0005886;GO:0016021	plasma membrane;integral component of membrane	K17776	MTX	http://www.genome.jp/dbget-bin/www_bget?ko:K17776	-	-	-	-	-	-
novel.9913	888	23.89	7.09	28.83	187.9	50.55	136.39	2.99751	1.14019e-06	2.04936e-05	-	-	-	-	-	-	-	-	-	-	-	-	-	-
gene15647	1005	18.05	9.79	16.2	187.91	19.23	34.02	2.99611	1.2754e-05	0.000163492	LOC104931498	KAE8279708.1	Carbonic anhydrase 1 [Larimichthys crocea]	GO:0015670;GO:0042539;GO:0004089;GO:0071466;GO:0008270;GO:0098719;GO:0006885	carbon dioxide transport;hypotonic salinity response;carbonate dehydratase activity;cellular response to xenobiotic stimulus;zinc ion binding;sodium ion import across plasma membrane;regulation of pH	K18245	CA2	http://www.genome.jp/dbget-bin/www_bget?ko:K18245	Nitrogen metabolism;Bile secretion;Gastric acid secretion;Pancreatic secretion;Collecting duct acid secretion;Proximal tubule bicarbonate reclamation	ko00910,ko04976,ko04971,ko04972,ko04966,ko04964	KOG0382	Carbonic anhydrase	sp|P83299|CAH1_CHIHA	Carbonic anhydrase 1 OS=Chionodraco hamatus OX=36188 GN=ca1 PE=1 SV=1
gene20648	3657	8.69	9.21	16.35	82.85	51.8	67.87	2.99582	5.41236e-11	2.84706e-09	LOC104936817	KAE8294437.1	Ubiquitin-protein ligase E3A [Larimichthys crocea]	GO:0004842;GO:0016874	ubiquitin-protein transferase activity;ligase activity	K10587	UBE3A,E6AP	http://www.genome.jp/dbget-bin/www_bget?ko:K10587	Ubiquitin mediated proteolysis;Viral carcinogenesis;Human papillomavirus infection	ko04120,ko05203,ko05165	KOG0941	E3 ubiquitin protein ligase	sp|Q05086|UBE3A_HUMAN	Ubiquitin-protein ligase E3A OS=Homo sapiens OX=9606 GN=UBE3A PE=1 SV=4
gene10671	2289	6.59	4.26	3.27	21.59	15.46	56.58	2.98949	1.01639e-15	1.53549e-13	LOC104926167	AKH05366.1;KAE8290735.1	mannose receptor 1 [Larimichthys crocea];Macrophage mannose receptor 1 [Larimichthys crocea]	GO:0016021;GO:0006897;GO:0030246	integral component of membrane;endocytosis;carbohydrate binding	K06560	MRC,CD206,CD280	http://www.genome.jp/dbget-bin/www_bget?ko:K06560	Phagosome;Tuberculosis	ko04145,ko05152	-	-	sp|Q61830|MRC1_MOUSE	Macrophage mannose receptor 1 OS=Mus musculus OX=10090 GN=Mrc1 PE=1 SV=2
gene11595	1787	7.25	5.69	23.55	113.9	40.87	69.8	2.98079	4.11442e-06	6.20821e-05	LOC104927162	XP_010739484.2	pyruvate dehydrogenase (acetyl-transferring) kinase isozyme 2, mitochondrial [Larimichthys crocea]	GO:0005524;GO:0004672;GO:0005759	ATP binding;protein kinase activity;mitochondrial matrix	K00898	PDK2_3_4	http://www.genome.jp/dbget-bin/www_bget?ko:K00898	Diabetic cardiomyopathy	ko05415	KOG0787	Dehydrogenase kinase	sp|Q9JK42|PDK2_MOUSE	[Pyruvate dehydrogenase (acetyl-transferring)] kinase isozyme 2, mitochondrial OS=Mus musculus OX=10090 GN=Pdk2 PE=1 SV=2
gene2040	1435	0.26	0.09	0.18	1.82	0.23	1.15	2.97767	0.0021545	0.0122235	cpb1	XP_010751702.1	carboxypeptidase B [Larimichthys crocea]	GO:0008270;GO:0071466;GO:0004181	zinc ion binding;cellular response to xenobiotic stimulus;metallocarboxypeptidase activity	K01291	CPB1	http://www.genome.jp/dbget-bin/www_bget?ko:K01291	Pancreatic secretion;Protein digestion and absorption	ko04972,ko04974	-	-	sp|P15086|CBPB1_HUMAN	Carboxypeptidase B OS=Homo sapiens OX=9606 GN=CPB1 PE=1 SV=4
novel.14100	1837	0.27	0.56	0	0.25	2.53	1.29	2.97082	0.00662412	0.0303507	-	-	-	-	-	-	-	-	-	-	-	-	-	-
gene17070	2917	2.74	5.35	4	25.01	16.54	30.81	2.97001	3.93281e-15	5.26906e-13	npepps	TMS23086.1	Puromycin-sensitive aminopeptidase [Larimichthys crocea]	GO:0008270;GO:0006952;GO:0008237;GO:0004177	zinc ion binding;defense response;metallopeptidase activity;aminopeptidase activity	K08776	NPEPPS	http://www.genome.jp/dbget-bin/www_bget?ko:K08776	-	-	KOG1046	Puromycin-sensitive aminopeptidase and related aminopeptidases	sp|Q11011|PSA_MOUSE	Puromycin-sensitive aminopeptidase OS=Mus musculus OX=10090 GN=Npepps PE=1 SV=2
gene15650	2223	7.09	2.68	7.2	32.48	18.86	59.2	2.96681	6.5749e-10	2.80378e-08	tmem100	XP_019117049.1	transmembrane protein 100 [Larimichthys crocea]	GO:0016021	integral component of membrane	-	-	-	-	-	-	-	sp|Q9NV29|TM100_HUMAN	Transmembrane protein 100 OS=Homo sapiens OX=9606 GN=TMEM100 PE=1 SV=2
gene16023	910	66.81	72.91	54.13	470.74	232.16	349.13	2.96307	1.07774e-13	1.02307e-11	psmd3	XP_027132058.1;XP_033933374.1	26S proteasome non-ATPase regulatory subunit 3 isoform X1 [Larimichthys crocea];26S proteasome non-ATPase regulatory subunit 3, partial [Pseudochaenichthys georgianus]	GO:0042176;GO:0000502;GO:0030234	regulation of protein catabolic process;proteasome complex;enzyme regulator activity	K03033	PSMD3,RPN3	http://www.genome.jp/dbget-bin/www_bget?ko:K03033	Proteasome;Epstein-Barr virus infection;Alzheimer disease;Amyotrophic lateral sclerosis;Huntington disease;Parkinson disease;Pathways of neurodegeneration - multiple diseases;Prion disease;Spinocerebellar ataxia	ko03050,ko05169,ko05010,ko05014,ko05016,ko05012,ko05022,ko05020,ko05017	KOG2581;KOG2582	26S proteasome regulatory complex, subunit RPN3/PSMD3;COP9 signalosome, subunit CSN3	sp|P14685|PSMD3_MOUSE	26S proteasome non-ATPase regulatory subunit 3 OS=Mus musculus OX=10090 GN=Psmd3 PE=1 SV=3
gene4143	1379	5.89	12.74	13.75	53.8	53.73	61.52	2.96157	3.61779e-11	1.99631e-09	rabggta	XP_019133197.1;TKS75067.1;TMS20662.1	geranylgeranyl transferase type-2 subunit alpha [Larimichthys crocea];Geranylgeranyl transferase type-2 subunit alpha [Collichthys lucidus];Geranylgeranyl transferase type-2 subunit alpha [Larimichthys crocea]	GO:0018344;GO:0008270;GO:0004663;GO:0005968	protein geranylgeranylation;zinc ion binding;Rab geranylgeranyltransferase activity;Rab-protein geranylgeranyltransferase complex	K14050	RABGGTA	http://www.genome.jp/dbget-bin/www_bget?ko:K14050	-	-	KOG0529	Protein geranylgeranyltransferase type II, alpha subunit	sp|Q5EA80|PGTA_BOVIN	Geranylgeranyl transferase type-2 subunit alpha OS=Bos taurus OX=9913 GN=RABGGTA PE=2 SV=1
gene4898	1092	4.96	15.64	47.48	158.02	130.88	112.7	2.95392	0.000159573	0.00138673	LOC104919937	XP_029912675.1;XP_027144465.1	proteasomal ubiquitin receptor ADRM1-like isoform X2 [Myripristis murdjan];proteasomal ubiquitin receptor ADRM1 [Larimichthys crocea]	-	-	K06691	RPN13	http://www.genome.jp/dbget-bin/www_bget?ko:K06691	Proteasome;Epstein-Barr virus infection;Alzheimer disease;Amyotrophic lateral sclerosis;Huntington disease;Parkinson disease;Pathways of neurodegeneration - multiple diseases;Prion disease;Spinocerebellar ataxia	ko03050,ko05169,ko05010,ko05014,ko05016,ko05012,ko05022,ko05020,ko05017	KOG3037	Cell membrane glycoprotein	sp|Q6NZ09|ADRM1_DANRE	Proteasomal ubiquitin receptor ADRM1 OS=Danio rerio OX=7955 GN=adrm1b PE=1 SV=1
gene22266	1384	45.75	72.54	55.77	357.97	268.33	361.31	2.95333	5.17112e-16	8.26578e-14	psmc6	XP_010753215.1	26S proteasome regulatory subunit 10B [Larimichthys crocea]	GO:0008540;GO:0005634;GO:0036402;GO:0005737;GO:0030433;GO:0005524	proteasome regulatory particle, base subcomplex;nucleus;proteasome-activating activity;cytoplasm;ubiquitin-dependent ERAD pathway;ATP binding	K03064	PSMC6,RPT4	http://www.genome.jp/dbget-bin/www_bget?ko:K03064	Proteasome;Epstein-Barr virus infection;Alzheimer disease;Amyotrophic lateral sclerosis;Huntington disease;Parkinson disease;Pathways of neurodegeneration - multiple diseases;Prion disease;Spinocerebellar ataxia	ko03050,ko05169,ko05010,ko05014,ko05016,ko05012,ko05022,ko05020,ko05017	KOG0651	26S proteasome regulatory complex, ATPase RPT4	sp|P62333|PRS10_HUMAN	26S proteasome regulatory subunit 10B OS=Homo sapiens OX=9606 GN=PSMC6 PE=1 SV=1
gene14504	1048	9.74	28.6	22	141.21	109.63	64.85	2.95332	3.77982e-07	7.88289e-06	LOC104930265	KAE8300887.1	Synaptogyrin-1 [Larimichthys crocea]	GO:0016021	integral component of membrane	-	-	-	-	-	-	-	sp|A7E3W5|SNG2_BOVIN	Synaptogyrin-2 OS=Bos taurus OX=9913 GN=SYNGR2 PE=2 SV=1
gene1728	4151	2.56	2.54	2.28	16.69	11.14	14.78	2.9533	9.63003e-16	1.46377e-13	ahcyl2	XP_010747430.1	adenosylhomocysteinase 3 isoform X1 [Larimichthys crocea]	GO:0004013;GO:0006730	adenosylhomocysteinase activity;one-carbon metabolic process	K01251	E3.3.1.1,ahcY	http://www.genome.jp/dbget-bin/www_bget?ko:K01251	Cysteine and methionine metabolism	ko00270	KOG1370	S-adenosylhomocysteine hydrolase	sp|A6QLP2|SAHH3_BOVIN	Adenosylhomocysteinase 3 OS=Bos taurus OX=9913 GN=AHCYL2 PE=1 SV=1
gene6995	3511	23.42	26.55	28.27	173.58	119.38	161.23	2.95029	3.38171e-16	5.58569e-14	usp5	XP_019116789.2;XP_010733307.3	ubiquitin carboxyl-terminal hydrolase 5 isoform X1 [Larimichthys crocea];ubiquitin carboxyl-terminal hydrolase 5 isoform X2 [Larimichthys crocea]	GO:0016579;GO:0008270;GO:0006511;GO:0009953;GO:0004843;GO:1904888	protein deubiquitination;zinc ion binding;ubiquitin-dependent protein catabolic process;dorsal/ventral pattern formation;thiol-dependent deubiquitinase;cranial skeletal system development	K11836	USP5_13,UBP14	http://www.genome.jp/dbget-bin/www_bget?ko:K11836	-	-	KOG0944	Ubiquitin-specific protease UBP14	sp|P45974|UBP5_HUMAN	Ubiquitin carboxyl-terminal hydrolase 5 OS=Homo sapiens OX=9606 GN=USP5 PE=1 SV=2
gene18476	2687	0.93	1.31	2.72	6.3	11.15	10.6	2.9395	2.57795e-07	5.67745e-06	c2cd2l	XP_027129284.1	phospholipid transfer protein C2CD2L [Larimichthys crocea]	GO:0016021	integral component of membrane	-	-	-	-	-	-	-	sp|Q80X80|C2C2L_MOUSE	Phospholipid transfer protein C2CD2L OS=Mus musculus OX=10090 GN=C2cd2l PE=1 SV=3
gene11950	1550	25.57	32.06	23.91	192.99	102.17	164.37	2.93231	1.17263e-15	1.73971e-13	psmd4	XP_010739959.1	26S proteasome non-ATPase regulatory subunit 4 [Larimichthys crocea]	GO:0005576;GO:0005524;GO:0007165;GO:0016307;GO:0000502	extracellular region;ATP binding;signal transduction;phosphatidylinositol phosphate kinase activity;proteasome complex	K03029	PSMD4,RPN10	http://www.genome.jp/dbget-bin/www_bget?ko:K03029	Proteasome;Epstein-Barr virus infection;Alzheimer disease;Amyotrophic lateral sclerosis;Huntington disease;Parkinson disease;Pathways of neurodegeneration - multiple diseases;Prion disease;Spinocerebellar ataxia	ko03050,ko05169,ko05010,ko05014,ko05016,ko05012,ko05022,ko05020,ko05017	KOG2884	26S proteasome regulatory complex, subunit RPN10/PSMD4	sp|Q58DA0|PSMD4_BOVIN	26S proteasome non-ATPase regulatory subunit 4 OS=Bos taurus OX=9913 GN=PSMD4 PE=2 SV=1
gene11026	705	0.14	0.37	0.48	2.84	0.61	2.44	2.92908	0.00446306	0.0220536	tmem55b	XP_030258827.1	type I phosphatidylinositol 4,5-bisphosphate 4-phosphatase-A [Sparus aurata]	GO:0016021;GO:0031902;GO:0005765;GO:0034597;GO:0046856	integral component of membrane;late endosome membrane;lysosomal membrane;phosphatidylinositol-4,5-bisphosphate 4-phosphatase activity;phosphatidylinositol dephosphorylation	K13084	TMEM55	http://www.genome.jp/dbget-bin/www_bget?ko:K13084	Phosphatidylinositol signaling system	ko04070	KOG4684	Uncharacterized conserved protein, contains C4-type Zn-finger	sp|Q32PR0|T55BA_DANRE	Type I phosphatidylinositol 4,5-bisphosphate 4-phosphatase-A OS=Danio rerio OX=7955 GN=tmem55ba PE=2 SV=1
gene14024	2454	2.52	2.69	2.43	14.5	13.89	10.31	2.92528	7.18627e-10	3.04354e-08	LOC104929770	XP_019134579.2	zinc finger FYVE domain-containing protein 1 [Larimichthys crocea]	GO:0046872	metal ion binding	K17603	ZFYVE1	http://www.genome.jp/dbget-bin/www_bget?ko:K17603	Autophagy - animal;Pathways of neurodegeneration - multiple diseases	ko04140,ko05022	KOG1818	Membrane trafficking and cell signaling protein HRS, contains VHS and FYVE domains	sp|Q9HBF4|ZFYV1_HUMAN	Zinc finger FYVE domain-containing protein 1 OS=Homo sapiens OX=9606 GN=ZFYVE1 PE=1 SV=1
gene3434	2150	15.92	13.1	12.69	46.51	38.72	198.66	2.92492	1.16093e-10	5.82253e-09	LOC104918372	XP_010728402.1	mitochondrial glutamate carrier 1 [Larimichthys crocea]	GO:0016021;GO:0005179;GO:0055085;GO:0005576	integral component of membrane;hormone activity;transmembrane transport;extracellular region	K15107	SLC25A18_22,GC	http://www.genome.jp/dbget-bin/www_bget?ko:K15107	-	-	KOG0750;KOG0751	Mitochondrial solute carrier protein;Mitochondrial aspartate/glutamate carrier protein Aralar/Citrin (contains EF-hand Ca2+-binding domains)	sp|Q9H936|GHC1_HUMAN	Mitochondrial glutamate carrier 1 OS=Homo sapiens OX=9606 GN=SLC25A22 PE=1 SV=1
novel.6325	1066	0.67	0.54	0.17	4.86	0.33	2.88	2.92144	0.00157487	0.00942031	-	KAE8298250.1	hypothetical protein D5F01_LYC02742 [Larimichthys crocea]	-	-	-	-	-	-	-	-	-	-	-
gene4920	1571	9.83	15.42	11.28	95.1	37.49	73.01	2.91157	8.0879e-12	5.19134e-10	dctn2	XP_027135024.1;XP_027135025.1	dynactin subunit 2 isoform X1 [Larimichthys crocea];dynactin subunit 2 isoform X2 [Larimichthys crocea]	GO:0005869;GO:0005737;GO:0007017;GO:0005815;GO:0030286	dynactin complex;cytoplasm;microtubule-based process;microtubule organizing center;dynein complex	K10424	DCTN2	http://www.genome.jp/dbget-bin/www_bget?ko:K10424	Salmonella infection;Amyotrophic lateral sclerosis;Huntington disease;Pathways of neurodegeneration - multiple diseases;Vasopressin-regulated water reabsorption	ko05132,ko05014,ko05016,ko05022,ko04962	-	-	sp|Q7T3H1|DCTN2_DANRE	Dynactin subunit 2 OS=Danio rerio OX=7955 GN=dctn2 PE=2 SV=1
gene19717	4450	8.35	11.01	13.78	51.39	46.61	52.11	2.90049	1.13254e-10	5.7045e-09	kiaa0368	XP_038560833.1;XP_027139118.1	proteasome adapter and scaffold protein ECM29, partial [Micropterus salmoides];proteasome adapter and scaffold protein ECM29 isoform X3 [Larimichthys crocea]	GO:0043248;GO:0000502;GO:0005737;GO:0060090	proteasome assembly;proteasome complex;cytoplasm;molecular adaptor activity	K11886	ECM29	http://www.genome.jp/dbget-bin/www_bget?ko:K11886	-	-	KOG0915	Uncharacterized conserved protein	sp|Q5VYK3|ECM29_HUMAN	Proteasome adapter and scaffold protein ECM29 OS=Homo sapiens OX=9606 GN=ECPAS PE=1 SV=2
gene16888	1689	0.17	0.04	0.05	0.36	0.44	0.59	2.89877	0.00629957	0.0291462	LOC104932831	XP_036963404.1	transmembrane protein 178B [Acanthopagrus latus]	GO:0016021	integral component of membrane	-	-	-	-	-	-	-	sp|F6V1J6|T178B_XENTR	Transmembrane protein 178B OS=Xenopus tropicalis OX=8364 GN=tmem178b PE=2 SV=2
gene7817	1930	17.48	49.25	15.16	70.59	96.09	357.84	2.89442	1.59341e-07	3.69302e-06	gadl1	XP_027143217.1	acidic amino acid decarboxylase GADL1 [Larimichthys crocea]	GO:0019752;GO:0030170;GO:0016831	carboxylic acid metabolic process;pyridoxal phosphate binding;carboxy-lyase activity	K18966	GADL1,CSAD	http://www.genome.jp/dbget-bin/www_bget?ko:K18966	Pantothenate and CoA biosynthesis;Taurine and hypotaurine metabolism;beta-Alanine metabolism	ko00770,ko00430,ko00410	KOG0629	Glutamate decarboxylase and related proteins	sp|A6QM00|GADL1_BOVIN	Acidic amino acid decarboxylase GADL1 OS=Bos taurus OX=9913 GN=GADL1 PE=2 SV=2
gene6176	4474	3.46	3.43	3.57	30.61	9.7	17.17	2.89186	1.46705e-09	5.70605e-08	LOC104921328	XP_027130493.1	zinc finger FYVE domain-containing protein 1 [Larimichthys crocea]	GO:0008270	zinc ion binding	K17603	ZFYVE1	http://www.genome.jp/dbget-bin/www_bget?ko:K17603	Autophagy - animal;Pathways of neurodegeneration - multiple diseases	ko04140,ko05022	KOG1818	Membrane trafficking and cell signaling protein HRS, contains VHS and FYVE domains	sp|Q9HBF4|ZFYV1_HUMAN	Zinc finger FYVE domain-containing protein 1 OS=Homo sapiens OX=9606 GN=ZFYVE1 PE=1 SV=1
gene3004	1955	1.34	0.27	0.43	3.85	1.83	6.59	2.88902	3.76816e-06	5.77722e-05	LOC104917894	KAE8277654.1;XP_010727773.2	hypothetical protein D5F01_LYC24352 [Larimichthys crocea];uncharacterized protein LOC104917894 [Larimichthys crocea]	GO:0007154;GO:0016021	cell communication;integral component of membrane	-	-	-	-	-	-	-	-	-
novel.13401	2573	0.05	0.25	0.24	0.4	0.18	3.53	2.88432	0.00262097	0.0143318	TGFA	XP_019117993.2	protransforming growth factor alpha isoform X2 [Larimichthys crocea]	GO:0008083;GO:0005154;GO:0016021	growth factor activity;epidermal growth factor receptor binding;integral component of membrane	K08774	TGFA	http://www.genome.jp/dbget-bin/www_bget?ko:K08774	ErbB signaling pathway;MAPK signaling pathway;PI3K-Akt signaling pathway;Ras signaling pathway;Pathways in cancer;Colorectal cancer;Glioma;Hepatocellular carcinoma;Non-small cell lung cancer;Pancreatic cancer;Prostate cancer;Renal cell carcinoma;EGFR tyrosine kinase inhibitor resistance;Estrogen signaling pathway	ko04012,ko04010,ko04151,ko04014,ko05200,ko05210,ko05214,ko05225,ko05223,ko05212,ko05215,ko05211,ko01521,ko04915	-	-	sp|P01135|TGFA_HUMAN	Protransforming growth factor alpha OS=Homo sapiens OX=9606 GN=TGFA PE=1 SV=1
novel.15198	435	0.37	0.33	2.11	4.61	5.83	3.7	2.88352	0.0074442	0.0332739	-	XP_037652317.1	cytochrome c oxidase subunit 8A, mitochondrial-like [Sebastes umbrosus]	GO:0005743;GO:0016021;GO:0006119;GO:0004129	mitochondrial inner membrane;integral component of membrane;oxidative phosphorylation;cytochrome-c oxidase activity	K02273	COX8	http://www.genome.jp/dbget-bin/www_bget?ko:K02273	Chemical carcinogenesis - reactive oxygen species;Diabetic cardiomyopathy;Non-alcoholic fatty liver disease;Alzheimer disease;Amyotrophic lateral sclerosis;Huntington disease;Parkinson disease;Pathways of neurodegeneration - multiple diseases;Prion disease;Oxidative phosphorylation;Cardiac muscle contraction;Thermogenesis	ko05208,ko05415,ko04932,ko05010,ko05014,ko05016,ko05012,ko05022,ko05020,ko00190,ko04260,ko04714	-	-	-	-
gene21995	2486	0.38	0.29	0.25	1.85	1.3	1.82	2.88184	6.35513e-08	1.63504e-06	map7d2	KAE8279646.1	MAP7 domain-containing protein 2 [Larimichthys crocea]	GO:0015630;GO:0000226	microtubule cytoskeleton;microtubule cytoskeleton organization	K24203	MAP7D2	http://www.genome.jp/dbget-bin/www_bget?ko:K24203	-	-	-	-	sp|Q5R7F9|MA7D2_PONAB	MAP7 domain-containing protein 2 OS=Pongo abelii OX=9601 GN=MAP7D2 PE=2 SV=1
gene12150	939	0.71	2.18	0	2.85	5.67	6.44	2.88032	0.00119678	0.00749603	LOC104927763	XP_010740215.2	homeobox protein Hox-A11b [Larimichthys crocea]	GO:0007275;GO:0005634;GO:0000981;GO:0003677	multicellular organism development;nucleus;DNA-binding transcription factor activity, RNA polymerase II-specific;DNA binding	K21951	HOXA11	http://www.genome.jp/dbget-bin/www_bget?ko:K21951	Transcriptional misregulation in cancer	ko05202	-	-	sp|Q1KKZ5|HXABB_TAKRU	Homeobox protein Hox-A11b OS=Takifugu rubripes OX=31033 GN=hoxa11b PE=3 SV=1
novel.7749	2095	0.2	0	0.23	0.23	0.83	1.41	2.87637	0.00544466	0.0259069	-	TMS11227.1	RNA-binding motif, single-stranded-interacting protein 3 [Larimichthys crocea]	-	-	-	-	-	-	-	-	-	-	-
gene8766	1935	0.11	0.16	0.12	0.4	0.76	1.01	2.87526	0.000457457	0.00335918	LOC104924143	XP_019111249.1	transcription factor Sox-9-A [Larimichthys crocea]	GO:0005634;GO:0000981	nucleus;DNA-binding transcription factor activity, RNA polymerase II-specific	K18435	SOX9	http://www.genome.jp/dbget-bin/www_bget?ko:K18435	cAMP signaling pathway	ko04024	KOG0527	HMG-box transcription factor	sp|Q6F2E7|SOX9_XENTR	Transcription factor Sox-9 OS=Xenopus tropicalis OX=8364 GN=sox9 PE=1 SV=1
gene141	1400	0.9	0	0.37	0.73	2.23	4.46	2.87172	0.00358696	0.0184954	nodal	XP_010742139.1	nodal homolog [Larimichthys crocea]	GO:0060041;GO:0014028;GO:0048382;GO:0001947;GO:0009306;GO:0021508;GO:2000223;GO:0009952;GO:0060061;GO:0001707;GO:0021537;GO:0009953;GO:0031290;GO:0008083;GO:0032991;GO:0048839;GO:0021854;GO:0001709;GO:0005576;GO:0046619;GO:0048854;GO:0016485	retina development in camera-type eye;notochord formation;mesendoderm development;heart looping;protein secretion;floor plate formation;regulation of BMP signaling pathway involved in heart jogging;anterior/posterior pattern specification;Spemann organizer formation;mesoderm formation;telencephalon development;dorsal/ventral pattern formation;retinal ganglion cell axon guidance;growth factor acti…	K04666	NODAL	http://www.genome.jp/dbget-bin/www_bget?ko:K04666	Signaling pathways regulating pluripotency of stem cells;TGF-beta signaling pathway;Cytokine-cytokine receptor interaction	ko04550,ko04350,ko04060	-	-	sp|Q91619|NODAL_XENLA	Nodal homolog OS=Xenopus laevis OX=8355 GN=nodal PE=1 SV=1
novel.19214	2588	1.56	1.61	0.81	4.53	9.21	5.44	2.86933	2.73507e-07	5.97041e-06	-	-	-	-	-	-	-	-	-	-	-	-	-	-
gene22335	2066	4.93	13.21	9.49	55.87	45.4	58.18	2.86788	2.21347e-11	1.29648e-09	lrp12	XP_027142411.1	low-density lipoprotein receptor-related protein 12 [Larimichthys crocea]	-	-	K20050	LRP3_10_12	http://www.genome.jp/dbget-bin/www_bget?ko:K20050	-	-	-	-	sp|Q8BUJ9|LRP12_MOUSE	Low-density lipoprotein receptor-related protein 12 OS=Mus musculus OX=10090 GN=Lrp12 PE=2 SV=2
novel.9525	1486	7.29	1.95	4.44	7.36	7.52	84.75	2.86548	0.000131745	0.00118265	ENDOD1	KAE8300023.1	Endonuclease domain-containing 1 protein [Larimichthys crocea]	GO:0004519;GO:0003676;GO:0046872	endonuclease activity;nucleic acid binding;metal ion binding	-	-	-	-	-	-	-	sp|O94919|ENDD1_HUMAN	Endonuclease domain-containing 1 protein OS=Homo sapiens OX=9606 GN=ENDOD1 PE=1 SV=2
gene14558	2875	3.08	0.76	3.99	6.86	17.69	25.29	2.86539	1.41938e-05	0.000179697	LOC104930328	TKS83691.1;XP_019110591.1;TMS14167.1;XP_019110590.1	Glycerophosphodiester phosphodiesterase domain-containing protein 5 [Collichthys lucidus];glycerophosphodiester phosphodiesterase domain-containing protein 5 isoform X3 [Larimichthys crocea];Glycerophosphodiester phosphodiesterase domain-containing protein 5 [Larimichthys crocea];glycerophosphodiester phosphodiesterase domain-containing protein 5 isoform X2 [Larimichthys crocea]	GO:0016021;GO:0008081;GO:0006629	integral component of membrane;phosphoric diester hydrolase activity;lipid metabolic process	-	-	-	-	-	-	-	sp|Q3KTM2|GDPD5_CHICK	Glycerophosphodiester phosphodiesterase domain-containing protein 5 OS=Gallus gallus OX=9031 GN=GDPD5 PE=1 SV=1
gene14754	2194	8.02	7.56	5.24	20.15	22.78	94.78	2.86486	2.3909e-10	1.11888e-08	LOC104930543	KAE8286881.1;TMS11934.1	Acetyl-coenzyme A synthetase 2-like, mitochondrial [Larimichthys crocea];Acetyl-coenzyme A synthetase 2-like, mitochondrial [Larimichthys crocea]	GO:0050218;GO:0003987;GO:0016208;GO:0019427;GO:0005524	propionate-CoA ligase activity;acetate-CoA ligase activity;AMP binding;acetyl-CoA biosynthetic process from acetate;ATP binding	K01895	ACSS1_2,acs	http://www.genome.jp/dbget-bin/www_bget?ko:K01895	Glycolysis / Gluconeogenesis;Glyoxylate and dicarboxylate metabolism;Propanoate metabolism;Pyruvate metabolism	ko00010,ko00630,ko00640,ko00620	KOG1175	Acyl-CoA synthetase	sp|Q99NB1|ACS2L_MOUSE	Acetyl-coenzyme A synthetase 2-like, mitochondrial OS=Mus musculus OX=10090 GN=Acss1 PE=1 SV=1
gene7782	1392	0.05	0.14	0.19	0.69	0.75	0.45	2.85856	0.00562231	0.0265227	LOC104923055	XP_014057515.1	PREDICTED: disintegrin and metalloproteinase domain-containing protein 22-like isoform X2 [Salmo salar]	GO:0007229;GO:0016021	integrin-mediated signaling pathway;integral component of membrane	K16068	ADAM22	http://www.genome.jp/dbget-bin/www_bget?ko:K16068	-	-	-	-	sp|Q9P0K1|ADA22_HUMAN	Disintegrin and metalloproteinase domain-containing protein 22 OS=Homo sapiens OX=9606 GN=ADAM22 PE=1 SV=1
gene9030	866	5.18	7.57	8.77	17	19.15	64.03	2.85575	2.42827e-11	1.4024e-09	LOC104924425	TDH06863.1;XP_027147112.1	hypothetical protein EPR50_G00117850 [Perca flavescens];cytochrome c [Larimichthys crocea]	GO:0009055;GO:0046872;GO:0020037;GO:0005758;GO:0070469	electron transfer activity;metal ion binding;heme binding;mitochondrial intermembrane space;respirasome	K08738	CYC	http://www.genome.jp/dbget-bin/www_bget?ko:K08738	Apoptosis;Apoptosis - fly;Apoptosis - multiple species;p53 signaling pathway;Pathways in cancer;Colorectal cancer;Small cell lung cancer;Lipid and atherosclerosis;Viral myocarditis;Platinum drug resistance;Non-alcoholic fatty liver disease;Legionellosis;Pathogenic Escherichia coli infection;Salmonella infection;Shigellosis;Tuberculosis;Toxoplasmosis;Epstein-Barr virus infection;Hepatitis B;Hepati…	ko04210,ko04214,ko04215,ko04115,ko05200,ko05210,ko05222,ko05417,ko05416,ko01524,ko04932,ko05134,ko05130,ko05132,ko05131,ko05152,ko05145,ko05169,ko05161,ko05160,ko05168,ko05163,ko05170,ko05164,ko05167,ko05162,ko05010,ko05014,ko05016,ko05012,ko05022,ko05020,ko05017,ko00190	KOG3453	Cytochrome c	sp|Q6IQM2|CYC_DANRE	Cytochrome c OS=Danio rerio OX=7955 GN=cyc PE=3 SV=3
gene10771	3427	4.13	3.33	4.06	15.06	26.24	25.59	2.85431	8.33044e-12	5.31946e-10	etv5	TMS06790.1	ETS translocation variant 5 [Larimichthys crocea]	GO:0003700;GO:0060217;GO:0035778;GO:0008285;GO:0005634;GO:0043565;GO:0035108	DNA-binding transcription factor activity;hemangioblast cell differentiation;pronephric nephron tubule epithelial cell differentiation;negative regulation of cell population proliferation;nucleus;sequence-specific DNA binding;limb morphogenesis	K15593	ETV5	http://www.genome.jp/dbget-bin/www_bget?ko:K15593	Transcriptional misregulation in cancer;Prostate cancer	ko05202,ko05215	KOG3806	Predicted transcription factor	sp|Q9CXC9|ETV5_MOUSE	ETS translocation variant 5 OS=Mus musculus OX=10090 GN=Etv5 PE=2 SV=1
gene5192	2792	6.91	6.39	5.93	41.68	34.16	18.34	2.85395	1.67534e-08	4.98297e-07	LOC104920268	KAE8292098.1	LMBR1 domain-containing protein 2-B [Larimichthys crocea]	GO:0016021	integral component of membrane	-	-	-	-	-	KOG2296	Integral membrane protein	sp|Q6P4P2|LMD2B_DANRE	G-protein coupled receptor-associated protein LMBRD2B OS=Danio rerio OX=7955 GN=lmbrd2b PE=2 SV=1
gene3620	740	1.53	4.26	5.46	8.1	32.56	11.9	2.85386	0.000185234	0.0015674	LOC104918618	XP_008297882.1	PREDICTED: myosin heavy chain, fast skeletal muscle-like, partial [Stegastes partitus]	GO:0051015;GO:0003774;GO:0005524;GO:0016459	actin filament binding;cytoskeletal motor activity;ATP binding;myosin complex	K24220	MYH1s	http://www.genome.jp/dbget-bin/www_bget?ko:K24220	-	-	-	-	sp|Q90339|MYSS_CYPCA	Myosin heavy chain, fast skeletal muscle OS=Cyprinus carpio OX=7962 PE=2 SV=2
gene13090	2579	0.72	0.68	2.91	7.69	3.48	16.9	2.84822	1.7258e-05	0.000212518	LOC104928771	XP_010741418.2	carbonic anhydrase 4 [Larimichthys crocea]	GO:0016021;GO:0004089;GO:0008270;GO:0005886;GO:0031225	integral component of membrane;carbonate dehydratase activity;zinc ion binding;plasma membrane;anchored component of membrane	K18246	CA4	http://www.genome.jp/dbget-bin/www_bget?ko:K18246	Nitrogen metabolism;Proximal tubule bicarbonate reclamation	ko00910,ko04964	KOG0382	Carbonic anhydrase	sp|P48284|CAH4_RAT	Carbonic anhydrase 4 OS=Rattus norvegicus OX=10116 GN=Ca4 PE=1 SV=1
gene23421	1243	1.23	0.06	0.07	2.23	1.24	4.78	2.84733	0.00344202	0.0178933	tymp	XP_027138302.1	thymidine phosphorylase [Larimichthys crocea]	GO:0006213;GO:0006206;GO:0016154;GO:0004645;GO:0009032	pyrimidine nucleoside metabolic process;pyrimidine nucleobase metabolic process;pyrimidine-nucleoside phosphorylase activity;1,4-alpha-oligoglucan phosphorylase activity;thymidine phosphorylase activity	K00758	deoA,TYMP	http://www.genome.jp/dbget-bin/www_bget?ko:K00758	Bladder cancer;Pyrimidine metabolism;Drug metabolism - other enzymes	ko05219,ko00240,ko00983	-	-	sp|P19971|TYPH_HUMAN	Thymidine phosphorylase OS=Homo sapiens OX=9606 GN=TYMP PE=1 SV=2
novel.9921	3141	0.25	0.02	0.24	1.88	0.37	0.31	2.83646	0.00453456	0.0223636	-	XP_036945228.1	uncharacterized protein LOC119014296 isoform X2 [Acanthopagrus latus]	-	-	-	-	-	-	-	-	-	-	-
gene7035	1632	32.28	31.47	25.98	106.39	82.2	369.34	2.83535	3.10088e-12	2.15807e-10	LOC104922263	XP_010733350.3	B-cell receptor CD22-like [Larimichthys crocea]	GO:0005886;GO:0016021	plasma membrane;integral component of membrane	K06499	CEACAM,CD66	http://www.genome.jp/dbget-bin/www_bget?ko:K06499	-	-	-	-	sp|P20273|CD22_HUMAN	B-cell receptor CD22 OS=Homo sapiens OX=9606 GN=CD22 PE=1 SV=2
gene8748	1805	0.19	0.28	0.14	0.37	0.34	3.47	2.8335	0.00173378	0.0102155	serpini1	XP_010735663.3	neuroserpin [Larimichthys crocea]	GO:0005615;GO:0016021	extracellular space;integral component of membrane	K23412	SERPINI1	http://www.genome.jp/dbget-bin/www_bget?ko:K23412	-	-	-	-	sp|Q90935|NEUS_CHICK	Neuroserpin OS=Gallus gallus OX=9031 GN=SERPINI1 PE=1 SV=1
gene23135	1585	1.63	0.66	1.76	1.09	12.74	4.09	2.833	0.00114625	0.00721658	LOC104939460	TMS01056.1	hypothetical protein E3U43_016797 [Larimichthys crocea]	-	-	K09614	CORIN	http://www.genome.jp/dbget-bin/www_bget?ko:K09614	-	-	-	-	sp|Q9Y5Q5|CORIN_HUMAN	Atrial natriuretic peptide-converting enzyme OS=Homo sapiens OX=9606 GN=CORIN PE=1 SV=2
gene21353	1996	0.21	1.09	1.93	9.24	4.68	1.88	2.83177	0.000719085	0.00491749	LOC104937568	KAE8296767.1	Patatin-like phospholipase domain-containing protein 2 [Larimichthys crocea]	GO:0016787;GO:0016042;GO:0016021	hydrolase activity;lipid catabolic process;integral component of membrane	K16816	PNPLA2,ATGL	http://www.genome.jp/dbget-bin/www_bget?ko:K16816	Glycerolipid metabolism;Regulation of lipolysis in adipocytes;Thermogenesis	ko00561,ko04923,ko04714	-	-	sp|Q8BJ56|PLPL2_MOUSE	Patatin-like phospholipase domain-containing protein 2 OS=Mus musculus OX=10090 GN=Pnpla2 PE=1 SV=1
gene16096	3862	11.16	21.59	42.03	124.88	152.11	82.65	2.83137	5.68963e-06	8.17196e-05	LOC104931982	KAE8298794.1	Cullin-associated NEDD8-dissociated protein 1 [Larimichthys crocea]	GO:0010265	SCF complex assembly	K24172	CAND2,TIP120B	http://www.genome.jp/dbget-bin/www_bget?ko:K24172	-	-	KOG1824	TATA-binding protein-interacting protein	sp|Q5R6L5|CAND1_PONAB	Cullin-associated NEDD8-dissociated protein 1 OS=Pongo abelii OX=9601 GN=CAND1 PE=2 SV=1
gene16588	3876	5.58	5.84	5.42	20.26	33.82	34.09	2.82539	3.2759e-12	2.26083e-10	slc35g1	XP_010746053.2	solute carrier family 35 member G1 [Larimichthys crocea]	GO:0016021	integral component of membrane	-	-	-	-	-	-	-	sp|Q2M3R5|S35G1_HUMAN	Solute carrier family 35 member G1 OS=Homo sapiens OX=9606 GN=SLC35G1 PE=1 SV=1
gene18031	1178	13.28	9.33	8.55	56.27	41.29	65.58	2.82246	2.2294e-16	3.88983e-14	bola1	XP_019134626.1	bolA-like protein 1 [Larimichthys crocea]	-	-	K22066	BOLA1	http://www.genome.jp/dbget-bin/www_bget?ko:K22066	-	-	KOG3348;KOG2313	BolA (bacterial stress-induced morphogen)-related protein;Stress-induced protein UVI31+	sp|Q5RCE5|BOLA1_PONAB	BolA-like protein 1 OS=Pongo abelii OX=9601 GN=BOLA1 PE=2 SV=1
gene2438	2453	36.45	12.43	34.14	238.93	82.52	111.64	2.82219	1.11247e-06	2.00746e-05	LOC104940348	TMS11210.1;XP_019110650.1;KAF1387834.1;XP_019110651.1	hypothetical protein E3U43_020203 [Larimichthys crocea];RNA-binding protein 24-like isoform X1 [Larimichthys crocea];hypothetical protein PFLUV_G00084040 [Perca fluviatilis];RNA-binding protein 24-like isoform X2 [Larimichthys crocea]	GO:0003723	RNA binding	K25006	RBM24_38	http://www.genome.jp/dbget-bin/www_bget?ko:K25006	-	-	KOG0149	Predicted RNA-binding protein SEB4 (RRM superfamily)	sp|Q76LC6|RBM24_DANRE	RNA-binding protein 24 OS=Danio rerio OX=7955 GN=rbm24 PE=2 SV=1
gene20595	997	60.37	67.39	60.09	318.51	271.62	359.2	2.82126	9.79785e-18	2.20683e-15	LOC104936758	XP_035524061.1;XP_010751147.1	proteasome subunit beta type-7 isoform X1 [Morone saxatilis];proteasome subunit beta type-7 [Larimichthys crocea]	GO:0051603;GO:0005839;GO:0005737;GO:0005634;GO:0004298	proteolysis involved in cellular protein catabolic process;proteasome core complex;cytoplasm;nucleus;threonine-type endopeptidase activity	K02739	PSMB7	http://www.genome.jp/dbget-bin/www_bget?ko:K02739	Proteasome;Alzheimer disease;Amyotrophic lateral sclerosis;Huntington disease;Parkinson disease;Pathways of neurodegeneration - multiple diseases;Prion disease;Spinocerebellar ataxia	ko03050,ko05010,ko05014,ko05016,ko05012,ko05022,ko05020,ko05017	KOG0173	20S proteasome, regulatory subunit beta type PSMB7/PSMB10/PUP1	sp|Q9JHW0|PSB7_RAT	Proteasome subunit beta type-7 OS=Rattus norvegicus OX=10116 GN=Psmb7 PE=1 SV=1
gene12610	1994	17.08	12.19	22.81	122.24	51.07	112.03	2.82023	2.57208e-10	1.19456e-08	LOC104928254	TKS84697.1	Ubiquitin-conjugating enzyme E2 G1 [Collichthys lucidus]	GO:0016740;GO:0005524	transferase activity;ATP binding	K10575	UBE2G1,UBC7	http://www.genome.jp/dbget-bin/www_bget?ko:K10575	Protein processing in endoplasmic reticulum;Ubiquitin mediated proteolysis;Parkinson disease;Pathways of neurodegeneration - multiple diseases	ko04141,ko04120,ko05012,ko05022	KOG0425	Ubiquitin-protein ligase	sp|P62253|UB2G1_HUMAN	Ubiquitin-conjugating enzyme E2 G1 OS=Homo sapiens OX=9606 GN=UBE2G1 PE=1 SV=3
gene4184	1103	0.17	0.13	0.5	1.05	1.2	1.88	2.8188	0.00127596	0.00792904	LOC104919195	TMS14299.1;XP_036975581.1	Hepatocyte cell adhesion molecule [Larimichthys crocea];hepatocyte cell adhesion molecule-like isoform X1 [Acanthopagrus latus]	GO:0016021;GO:0005886	integral component of membrane;plasma membrane	K23116	HEPACAM	http://www.genome.jp/dbget-bin/www_bget?ko:K23116	-	-	-	-	sp|Q640R3|HECAM_MOUSE;sp|A4FUY1|HECAM_BOVIN	Hepatocyte cell adhesion molecule OS=Mus musculus OX=10090 GN=Hepacam PE=1 SV=2;Hepatocyte cell adhesion molecule OS=Bos taurus OX=9913 GN=HEPACAM PE=2 SV=1
novel.18020	1473	4.12	3.07	9.97	30.61	22.5	43.97	2.81713	1.12914e-07	2.71344e-06	-	TKS85013.1	Vesicle-associated membrane protein 3 [Collichthys lucidus]	GO:0016021;GO:0016192	integral component of membrane;vesicle-mediated transport	-	-	-	-	-	-	-	-	-
gene16587	2374	0.23	0.43	1.77	3.66	5.67	2.53	2.81527	0.000500161	0.00362127	LOC104932511	XP_027145216.1;XP_019127466.1	leucine-rich glioma-inactivated protein 1 isoform X2 [Larimichthys crocea];leucine-rich glioma-inactivated protein 1 isoform X1 [Larimichthys crocea]	GO:0005576;GO:0048854;GO:0042552	extracellular region;brain morphogenesis;myelination	K25428	LGI1	http://www.genome.jp/dbget-bin/www_bget?ko:K25428	-	-	-	-	sp|Q1EGL2|LGI1_PANTR	Leucine-rich glioma-inactivated protein 1 OS=Pan troglodytes OX=9598 GN=LGI1 PE=2 SV=1
gene19477	2549	0.6	0.4	0.85	2.45	0.97	8.76	2.81059	9.89774e-06	0.000131984	gja5	XP_010749760.1	gap junction alpha-5 protein [Larimichthys crocea]	GO:0005243;GO:0005922;GO:0016021;GO:0007154	gap junction channel activity;connexin complex;integral component of membrane;cell communication	K07614	GJA5,CX40	http://www.genome.jp/dbget-bin/www_bget?ko:K07614	-	-	-	-	sp|Q0VCR2|CXA5_BOVIN	Gap junction alpha-5 protein OS=Bos taurus OX=9913 GN=GJA5 PE=2 SV=1
gene7910	886	2.33	1.67	1.8	5.94	6.84	21.08	2.80764	1.95142e-08	5.69475e-07	LOC104923198	KAE8286078.1	hypothetical protein D5F01_LYC15758 [Larimichthys crocea]	GO:0006914	autophagy	-	-	-	-	-	-	-	sp|F1QCN0|GAL3A_DANRE	Glutamine amidotransferase-like class 1 domain-containing protein 3A, mitochondrial OS=Danio rerio OX=7955 GN=gatd3a PE=3 SV=1
novel.21786	536	2.27	5.53	8.62	29.23	23.75	33.13	2.80727	7.561e-07	1.43549e-05	rilpl1	TKS84988.1	Huntingtin-interacting protein 1-related protein [Collichthys lucidus]	GO:0006897;GO:0030276;GO:0015031;GO:0030136;GO:0046983;GO:2000369;GO:0005905;GO:0035091;GO:0003779;GO:0005737;GO:0006915	endocytosis;clathrin binding;protein transport;clathrin-coated vesicle;protein dimerization activity;regulation of clathrin-dependent endocytosis;clathrin-coated pit;phosphatidylinositol binding;actin binding;cytoplasm;apoptotic process	K20173	RILPL1	http://www.genome.jp/dbget-bin/www_bget?ko:K20173	-	-	-	-	sp|Q0IHE5|RIPL1_XENLA	RILP-like protein 1 OS=Xenopus laevis OX=8355 GN=rilpl1 PE=2 SV=1
gene21084	2704	0.56	1.37	1.56	4.55	7.5	4.77	2.80552	2.35274e-06	3.85781e-05	LOC104937272	XP_027131107.1	pleckstrin homology domain-containing family O member 1 [Larimichthys crocea]	GO:0005634;GO:0005737;GO:0016020	nucleus;cytoplasm;membrane	K24022	PLEKHO	http://www.genome.jp/dbget-bin/www_bget?ko:K24022	-	-	-	-	sp|Q53GL0|PKHO1_HUMAN	Pleckstrin homology domain-containing family O member 1 OS=Homo sapiens OX=9606 GN=PLEKHO1 PE=1 SV=2
gene19172	629	0.09	1.78	0.41	6.36	2.07	1.87	2.7978	0.00551845	0.0261775	LOC104935276	TMS16606.1	Mitochondrial carrier-like protein 1 [Larimichthys crocea]	GO:0016021	integral component of membrane	K17885	MTCH	http://www.genome.jp/dbget-bin/www_bget?ko:K17885	-	-	KOG2745	Mitochondrial carrier protein	sp|Q9NZJ7|MTCH1_HUMAN	Mitochondrial carrier homolog 1 OS=Homo sapiens OX=9606 GN=MTCH1 PE=1 SV=1
gene881	2081	10.76	5.89	6.58	42.99	15.21	78.39	2.79739	9.08572e-10	3.72695e-08	faxdc2	XP_010735823.1	fatty acid hydroxylase domain-containing protein 2 [Larimichthys crocea]	GO:0005506;GO:0016021;GO:0008610;GO:0016491	iron ion binding;integral component of membrane;lipid biosynthetic process;oxidoreductase activity	K22282	FAXDC2	http://www.genome.jp/dbget-bin/www_bget?ko:K22282	-	-	KOG0873	C-4 sterol methyl oxidase	sp|Q96IV6|FXDC2_HUMAN	Fatty acid hydroxylase domain-containing protein 2 OS=Homo sapiens OX=9606 GN=FAXDC2 PE=1 SV=1
gene6278	1227	0.19	0.16	0.58	1.91	1.79	0.33	2.7972	0.00769946	0.0341745	LOC104921450	XP_019126159.2	translation initiation factor eIF-2B subunit beta isoform X2 [Larimichthys crocea]	GO:0003743;GO:0044237	translation initiation factor activity;cellular metabolic process	K03754	EIF2B2	http://www.genome.jp/dbget-bin/www_bget?ko:K03754	Herpes simplex virus 1 infection	ko05168	KOG1466	Translation initiation factor 2B, alpha subunit (eIF-2Balpha/GCN3)	sp|Q90511|EI2BB_TAKRU	Translation initiation factor eIF-2B subunit beta OS=Takifugu rubripes OX=31033 GN=eif2b2 PE=3 SV=1
gene8693	4049	1.94	2.01	1.15	10.61	3.69	14.21	2.79593	4.67993e-11	2.49892e-09	alpk1	KAE8278908.1	Alpha-protein kinase 1 [Larimichthys crocea]	GO:0004674;GO:0005524	protein serine/threonine kinase activity;ATP binding	K08868	ALPK	http://www.genome.jp/dbget-bin/www_bget?ko:K08868	-	-	-	-	sp|Q96QP1|ALPK1_HUMAN	Alpha-protein kinase 1 OS=Homo sapiens OX=9606 GN=ALPK1 PE=1 SV=3
gene6780	1805	1.12	1.89	0.98	6.13	8.42	4.64	2.78748	1.30797e-06	2.32302e-05	hebp2	TMS12084.1	Heme-binding protein 2 [Larimichthys crocea]	-	-	-	-	-	-	-	-	-	sp|Q9Y5Z4|HEBP2_HUMAN	Heme-binding protein 2 OS=Homo sapiens OX=9606 GN=HEBP2 PE=1 SV=1
gene20162	2084	11.33	10.87	10.05	59.52	36.54	76.07	2.78469	1.10978e-20	3.66612e-18	LOC104936337	XP_010750662.1	rab proteins geranylgeranyltransferase component A 1 [Larimichthys crocea]	GO:0016740;GO:0005096;GO:0018344;GO:0007264;GO:0006886;GO:0005968;GO:0005092;GO:0043547	transferase activity;GTPase activator activity;protein geranylgeranylation;small GTPase mediated signal transduction;intracellular protein transport;Rab-protein geranylgeranyltransferase complex;GDP-dissociation inhibitor activity;positive regulation of GTPase activity	K23460	CHM,CHML	http://www.genome.jp/dbget-bin/www_bget?ko:K23460	-	-	KOG1439	RAB proteins geranylgeranyltransferase component A (RAB escort protein)	sp|P37727|RAE1_RAT	Rab proteins geranylgeranyltransferase component A 1 OS=Rattus norvegicus OX=10116 GN=Chm PE=1 SV=1
gene2044	1234	0.31	0.78	0.43	5.04	0.93	1.51	2.78347	0.000748234	0.00507758	LOC104937253	KAE8279823.1	Phospholipid scramblase 1 [Larimichthys crocea]	GO:0017128	phospholipid scramblase activity	-	-	-	-	-	KOG0621	Phospholipid scramblase	sp|O15162|PLS1_HUMAN	Phospholipid scramblase 1 OS=Homo sapiens OX=9606 GN=PLSCR1 PE=1 SV=1
gene22337	4028	6.69	3.24	5.27	21.84	12.57	56.35	2.78227	6.0861e-10	2.62242e-08	c6	XP_027134418.1	complement component C6 [Larimichthys crocea]	GO:0006958;GO:0005579;GO:0045087;GO:0005576;GO:0019835	complement activation, classical pathway;membrane attack complex;innate immune response;extracellular region;cytolysis	K03995	C6	http://www.genome.jp/dbget-bin/www_bget?ko:K03995	Systemic lupus erythematosus;Coronavirus disease - COVID-19;Prion disease;Complement and coagulation cascades	ko05322,ko05171,ko05020,ko04610	-	-	sp|Q811M5|CO6_RAT	Complement component C6 OS=Rattus norvegicus OX=10116 GN=C6 PE=2 SV=1
gene11146	1170	7.42	8.88	4.46	57.52	10.05	41.76	2.78197	6.75882e-07	1.30114e-05	LOC104926667	KAE8300037.1	Heme oxygenase [Larimichthys crocea]	GO:0046872;GO:0006788;GO:0004392;GO:0016021	metal ion binding;heme oxidation;heme oxygenase (decyclizing) activity;integral component of membrane	K00510	HMOX1	http://www.genome.jp/dbget-bin/www_bget?ko:K00510	Ferroptosis;HIF-1 signaling pathway;Chemical carcinogenesis - reactive oxygen species;MicroRNAs in cancer;Pathways in cancer;Hepatocellular carcinoma;Fluid shear stress and atherosclerosis;Porphyrin and chlorophyll metabolism;Mineral absorption	ko04216,ko04066,ko05208,ko05206,ko05200,ko05225,ko05418,ko00860,ko04978	-	-	sp|O73688|HMOX_TAKRU	Heme oxygenase OS=Takifugu rubripes OX=31033 GN=hmox PE=3 SV=1
gene19658	2275	5.85	5.04	8.97	28.77	41.58	18.85	2.78082	4.47401e-07	9.13869e-06	sepsecs	XP_019134991.1	O-phosphoseryl-tRNA(Sec) selenium transferase [Larimichthys crocea]	GO:0000049;GO:0097056;GO:0016785;GO:0006412;GO:0005737	tRNA binding;selenocysteinyl-tRNA(Sec) biosynthetic process;selenotransferase activity;translation;cytoplasm	K03341	SEPSECS	http://www.genome.jp/dbget-bin/www_bget?ko:K03341	Aminoacyl-tRNA biosynthesis;Selenocompound metabolism	ko00970,ko00450	KOG3843	Predicted serine hydroxymethyltransferase SLA/LP (autoimmune hepatitis marker in humans)	sp|Q803A7|SPCS_DANRE	O-phosphoseryl-tRNA(Sec) selenium transferase OS=Danio rerio OX=7955 GN=sepsecs PE=2 SV=1
gene1236	4391	25.36	9.15	36.12	239.19	45.73	68.05	2.78065	7.21117e-05	0.00071437	alpk2	XP_027138036.1	alpha-protein kinase 2 [Larimichthys crocea]	GO:0005524;GO:0004674	ATP binding;protein serine/threonine kinase activity	K08868	ALPK	http://www.genome.jp/dbget-bin/www_bget?ko:K08868	-	-	-	-	sp|F1QU13|ALPK2_DANRE	Alpha-protein kinase 2 OS=Danio rerio OX=7955 GN=alpk2 PE=2 SV=2
gene21966	1205	1.21	0.29	0.37	1.77	1.97	7.13	2.77917	9.38186e-05	0.000890253	LOC104938220	XP_010752881.1	C-X-C chemokine receptor type 4 [Larimichthys crocea]	GO:0060231;GO:0048703;GO:0060271;GO:0070121;GO:1903045;GO:0008283;GO:0042074;GO:0030239;GO:0002042;GO:0061053;GO:0007368;GO:0004930;GO:0001570;GO:0000082;GO:0016021;GO:0001946;GO:0000902	mesenchymal to epithelial transition;embryonic viscerocranium morphogenesis;cilium assembly;Kupffer's vesicle development;neural crest cell migration involved in sympathetic nervous system development;cell population proliferation;cell migration involved in gastrulation;myofibril assembly;cell migration involved in sprouting angiogenesis;somite development;determination of left/right symmetry;G p…	K04189	CXCR4,CD184	http://www.genome.jp/dbget-bin/www_bget?ko:K04189	Regulation of actin cytoskeleton;Endocytosis;Calcium signaling pathway;Cytokine-cytokine receptor interaction;Viral protein interaction with cytokine and cytokine receptor;Pathways in cancer;Human cytomegalovirus infection;Human immunodeficiency virus 1 infection;Axon guidance;Chemokine signaling pathway;Intestinal immune network for IgA production;Leukocyte transendothelial migration	ko04810,ko04144,ko04020,ko04060,ko04061,ko05200,ko05163,ko05170,ko04360,ko04062,ko04672,ko04670	-	-	sp|Q764M9|CXCR4_PIG	C-X-C chemokine receptor type 4 OS=Sus scrofa OX=9823 GN=CXCR4 PE=2 SV=1
gene2805	6213	2.78	5.34	4.25	26.94	16.98	16.5	2.77492	1.33228e-09	5.26215e-08	atg9b	XP_010727497.2	autophagy-related protein 9A isoform X1 [Larimichthys crocea]	GO:0015031;GO:0000421;GO:0016021;GO:0006914;GO:0030659;GO:0005794	protein transport;autophagosome membrane;integral component of membrane;autophagy;cytoplasmic vesicle membrane;Golgi apparatus	K17907	ATG9	http://www.genome.jp/dbget-bin/www_bget?ko:K17907	Autophagy - animal;Autophagy - other;Mitophagy - animal	ko04140,ko04136,ko04137	KOG2173	Integral membrane protein	sp|Q3T904|ATG9A_BOVIN	Autophagy-related protein 9A OS=Bos taurus OX=9913 GN=ATG9A PE=2 SV=1
gene5735	2980	20.46	53.33	101.84	504.76	276.63	172.75	2.77438	6.48648e-05	0.000654844	LOC104920865	XP_019123879.1;TMS07614.1;XP_010731550.1	ubiquitin carboxyl-terminal hydrolase 2 isoform X4 [Larimichthys crocea];Ubiquitin carboxyl-terminal hydrolase 2 [Larimichthys crocea];ubiquitin carboxyl-terminal hydrolase 2 isoform X3 [Larimichthys crocea]	GO:0004843;GO:0006511;GO:0016579	thiol-dependent deubiquitinase;ubiquitin-dependent protein catabolic process;protein deubiquitination	K11833	USP2	http://www.genome.jp/dbget-bin/www_bget?ko:K11833	-	-	KOG1868	Ubiquitin C-terminal hydrolase	sp|O75604|UBP2_HUMAN;sp|Q2KHV7|UBP2_BOVIN	Ubiquitin carboxyl-terminal hydrolase 2 OS=Homo sapiens OX=9606 GN=USP2 PE=1 SV=2;Ubiquitin carboxyl-terminal hydrolase 2 OS=Bos taurus OX=9913 GN=USP2 PE=2 SV=1
gene16055	2599	0.79	0.67	1.16	6.32	2.39	5.03	2.77183	4.80147e-08	1.2696e-06	LOC104931933	XP_019114443.2	afadin- and alpha-actinin-binding protein isoform X1 [Larimichthys crocea]	GO:0005912;GO:0005815	adherens junction;microtubule organizing center	K06085	SSX2IP,ADIP	http://www.genome.jp/dbget-bin/www_bget?ko:K06085	Adherens junction	ko04520	-	-	sp|H2MTR9|ADIP_ORYLA	Afadin- and alpha-actinin-binding protein OS=Oryzias latipes OX=8090 GN=ssx2ip PE=3 SV=1
gene7000	1613	6.25	1.81	3.76	11.59	13.26	43.9	2.76972	2.87321e-07	6.22806e-06	LOC104922236	XP_010733312.3	CD209 antigen-like protein E [Larimichthys crocea]	-	-	K10059	CLEC4E,MINCLE	http://www.genome.jp/dbget-bin/www_bget?ko:K10059	Tuberculosis;C-type lectin receptor signaling pathway	ko05152,ko04625	-	-	sp|Q67EQ1|CLC4E_RAT	C-type lectin domain family 4 member E OS=Rattus norvegicus OX=10116 GN=Clec4e PE=1 SV=1
gene18244	2389	5.18	3.8	3.63	27.09	11.05	28.39	2.76476	1.35354e-12	1.01315e-10	oxnad1	XP_019131017.1	oxidoreductase NAD-binding domain-containing protein 1 [Larimichthys crocea]	GO:0004128	cytochrome-b5 reductase activity, acting on NAD(P)H	-	-	-	-	-	-	-	sp|A3KP77|OXND1_DANRE	Oxidoreductase NAD-binding domain-containing protein 1 OS=Danio rerio OX=7955 GN=oxnad1 PE=2 SV=1
gene775	1779	1.22	2.14	0.73	8.26	5.81	4.94	2.76263	5.52457e-07	1.09065e-05	brf2	XP_010734420.2	transcription factor IIIB 50 kDa subunit [Larimichthys crocea]	GO:0046872;GO:0070897;GO:0051301	metal ion binding;transcription preinitiation complex assembly;cell division	K15197	BRF2	http://www.genome.jp/dbget-bin/www_bget?ko:K15197	-	-	-	-	sp|A8KBY2|BRF2_DANRE	Transcription factor IIIB 50 kDa subunit OS=Danio rerio OX=7955 GN=brf2 PE=2 SV=1
gene2373	3569	6.09	8.74	19.68	69.05	52.73	52.71	2.76242	8.60083e-07	1.59621e-05	LOC104940301	TKS74197.1;XP_027145899.1	UV excision repair protein RAD23 -like protein B [Collichthys lucidus];UV excision repair protein RAD23 homolog B [Larimichthys crocea]	GO:0003684;GO:0005654;GO:0031593;GO:0005634;GO:0000502;GO:0005829;GO:0043130;GO:0006289;GO:0043161	damaged DNA binding;nucleoplasm;polyubiquitin modification-dependent protein binding;nucleus;proteasome complex;cytosol;ubiquitin binding;nucleotide-excision repair;proteasome-mediated ubiquitin-dependent protein catabolic process	K10839	RAD23,HR23	http://www.genome.jp/dbget-bin/www_bget?ko:K10839	Protein processing in endoplasmic reticulum;Nucleotide excision repair	ko04141,ko03420	KOG0011	Nucleotide excision repair factor NEF2, RAD23 component	sp|P54728|RD23B_MOUSE;sp|Q4KMA2|RD23B_RAT	UV excision repair protein RAD23 homolog B OS=Mus musculus OX=10090 GN=Rad23b PE=1 SV=2;UV excision repair protein RAD23 homolog B OS=Rattus norvegicus OX=10116 GN=Rad23b PE=1 SV=1
gene5260	1723	9.13	6.42	5.91	25.78	17.2	83.87	2.7596	2.57465e-10	1.19456e-08	LOC104920318	XP_010730858.3	transcobalamin-2 [Larimichthys crocea]	GO:0006824;GO:0005576;GO:0015889;GO:0031419	cobalt ion transport;extracellular region;cobalamin transport;cobalamin binding	K14619	TCN2	http://www.genome.jp/dbget-bin/www_bget?ko:K14619	Vitamin digestion and absorption	ko04977	-	-	sp|Q9XSC9|TCO2_BOVIN	Transcobalamin-2 OS=Bos taurus OX=9913 GN=TCN2 PE=1 SV=1
gene17648	2592	11.81	3.39	8.53	6.55	43.83	78.05	2.75766	0.000113736	0.00104406	LOC104933616	XP_019124211.1	PRELI domain containing protein 3B-like isoform X1 [Larimichthys crocea]	GO:0005758	mitochondrial intermembrane space	-	-	-	-	-	KOG3336	Predicted member of the intramitochondrial sorting protein family	sp|Q4R5S9|PLD3B_MACFA	PRELI domain containing protein 3B OS=Macaca fascicularis OX=9541 GN=PRELID3B PE=2 SV=1
gene5986	2117	1.06	0.79	0.49	2.27	1.45	10.69	2.75645	5.57768e-06	8.03445e-05	LOC104921119	TMS07581.1	C5a anaphylatoxin chemotactic receptor 1 [Larimichthys crocea]	GO:0031410;GO:0005886;GO:0016021;GO:0004930;GO:0004878;GO:0006935	cytoplasmic vesicle;plasma membrane;integral component of membrane;G protein-coupled receptor activity;complement component C5a receptor activity;chemotaxis	K04010	C5AR1,CD88	http://www.genome.jp/dbget-bin/www_bget?ko:K04010	Neuroactive ligand-receptor interaction;Alcoholic liver disease;Staphylococcus aureus infection;Coronavirus disease - COVID-19;Complement and coagulation cascades;Neutrophil extracellular trap formation	ko04080,ko04936,ko05150,ko05171,ko04610,ko04613	-	-	sp|Q6UNA4|C5AR1_ONCMY	C5a anaphylatoxin chemotactic receptor 1 OS=Oncorhynchus mykiss OX=8022 GN=c5ar1 PE=2 SV=1
gene14203	3429	4.57	2.54	4.93	28.1	13.3	18.86	2.75369	1.0207e-08	3.22151e-07	rasgef1b	XP_027133207.1	ras-GEF domain-containing family member 1B isoform X1 [Larimichthys crocea]	GO:0005085;GO:0007264	guanyl-nucleotide exchange factor activity;small GTPase mediated signal transduction	-	-	-	-	-	KOG3541	Predicted guanine nucleotide exchange factor	sp|Q6DHR3|RG1BA_DANRE	Ras-GEF domain-containing family member 1B-A OS=Danio rerio OX=7955 GN=rasgef1ba PE=2 SV=2
novel.21101	769	0	0.76	0.69	3.1	2.54	0.78	2.75341	0.0121087	0.0491007	-	KAE8297725.1	hypothetical protein D5F01_LYC04366 [Larimichthys crocea]	GO:0016021	integral component of membrane	K17353	TSPAN18	http://www.genome.jp/dbget-bin/www_bget?ko:K17353	-	-	-	-	-	-
gene1788	2832	0.16	0.17	0.35	0.75	1.45	0.99	2.75249	9.39644e-05	0.000891187	LOC104934325	KAE8287892.1	Androgen receptor Dihydrotestosterone receptor Nuclear receptor subfamily 3 group C member 4 [Larimichthys crocea]	GO:0005634;GO:0008270;GO:0003700;GO:0043565	nucleus;zinc ion binding;DNA-binding transcription factor activity;sequence-specific DNA binding	K08557	AR,NR3C4	http://www.genome.jp/dbget-bin/www_bget?ko:K08557	Oocyte meiosis;Chemical carcinogenesis - receptor activation;Pathways in cancer;Prostate cancer	ko04114,ko05207,ko05200,ko05215	-	-	sp|P49699|ANDR_RABIT	Androgen receptor (Fragment) OS=Oryctolagus cuniculus OX=9986 GN=AR PE=2 SV=1
gene3835	1020	4.62	3.89	3.6	29.59	7.16	27.33	2.75084	4.33885e-08	1.15343e-06	stk19	XP_010728965.2	serine/threonine-protein kinase 19 [Larimichthys crocea]	GO:0016301	kinase activity	K08880	STK19	http://www.genome.jp/dbget-bin/www_bget?ko:K08880	-	-	-	-	sp|Q9JHN8|STK19_MOUSE	Serine/threonine-protein kinase 19 OS=Mus musculus OX=10090 GN=Stk19 PE=2 SV=2
gene22543	1680	51.13	85.15	43.02	429.9	157.15	297.91	2.74936	1.41704e-09	5.56396e-08	LOC104938830	TKS66878.1	Mid1-interacting protein 1-B [Collichthys lucidus]	GO:0005634;GO:0005737	nucleus;cytoplasm	-	-	-	-	-	-	-	sp|Q1LUV9|M1I1B_DANRE	Mid1-interacting protein 1-B OS=Danio rerio OX=7955 GN=mid1ip1b PE=2 SV=1
gene6943	2605	0.74	0.19	0.39	1.54	1.12	5.31	2.74602	5.2191e-06	7.59297e-05	stac	KAE8289981.1;XP_027131039.1;XP_027131040.1	SH3 and cysteine-rich domain-containing protein [Larimichthys crocea];SH3 and cysteine-rich domain-containing protein isoform X1 [Larimichthys crocea];SH3 and cysteine-rich domain-containing protein isoform X2 [Larimichthys crocea]	GO:0042383;GO:0035556	sarcolemma;intracellular signal transduction	K23711	STAC	http://www.genome.jp/dbget-bin/www_bget?ko:K23711	-	-	-	-	sp|Q99469|STAC_HUMAN	SH3 and cysteine-rich domain-containing protein OS=Homo sapiens OX=9606 GN=STAC PE=1 SV=1
gene2403	1317	23.85	27.8	9.9	109.03	85.23	95.03	2.74378	1.60339e-09	6.159e-08	glipr2	XP_010755193.1	Golgi-associated plant pathogenesis-related protein 1 [Larimichthys crocea]	GO:0005576	extracellular region	K24835	GLIPR2	http://www.genome.jp/dbget-bin/www_bget?ko:K24835	-	-	KOG3017	Defense-related protein containing SCP domain	sp|Q9H4G4|GAPR1_HUMAN	Golgi-associated plant pathogenesis-related protein 1 OS=Homo sapiens OX=9606 GN=GLIPR2 PE=1 SV=3
gene11299	1871	4.73	9.15	6.09	36.7	18.83	49.96	2.74368	1.21897e-12	9.26417e-11	LOC104926834	XP_010739087.1	26S proteasome non-ATPase regulatory subunit 11A [Larimichthys crocea]	GO:0043248;GO:0000502	proteasome assembly;proteasome complex	K03036	PSMD11,RPN6	http://www.genome.jp/dbget-bin/www_bget?ko:K03036	Proteasome;Epstein-Barr virus infection;Alzheimer disease;Amyotrophic lateral sclerosis;Huntington disease;Parkinson disease;Pathways of neurodegeneration - multiple diseases;Prion disease;Spinocerebellar ataxia	ko03050,ko05169,ko05010,ko05014,ko05016,ko05012,ko05022,ko05020,ko05017	KOG1463	26S proteasome regulatory complex, subunit RPN6/PSMD11	sp|F6P3G4|PS11A_DANRE	26S proteasome non-ATPase regulatory subunit 11A OS=Danio rerio OX=7955 GN=psmd11a PE=2 SV=1
gene17462	3526	5.67	4.69	3.85	20.28	8.25	26.83	2.74305	1.33281e-14	1.53159e-12	tsc22d1	XP_010747171.3;XP_010747172.1;XP_010747173.1	TSC22 domain family protein 1 isoform X1 [Larimichthys crocea];TSC22 domain family protein 1 isoform X4 [Larimichthys crocea];TSC22 domain family protein 1 isoform X5 [Larimichthys crocea]	GO:0006357	regulation of transcription by RNA polymerase II	-	-	-	-	-	KOG4797	Transcriptional regulator	sp|Q91012|T22D1_CHICK;sp|Q3MHL6|T22D1_BOVIN	TSC22 domain family protein 1 OS=Gallus gallus OX=9031 GN=TSC22D1 PE=2 SV=2;TSC22 domain family protein 1 OS=Bos taurus OX=9913 GN=TSC22D1 PE=2 SV=1
gene6841	3335	1.63	2.4	1.87	11.61	2.4	14.09	2.74212	6.74478e-08	1.721e-06	LOC104922056	XP_010733068.1;XP_019119913.1	cytoplasmic dynein 1 light intermediate chain 1 isoform X2 [Larimichthys crocea];cytoplasmic dynein 1 light intermediate chain 1 isoform X1 [Larimichthys crocea]	GO:0007018;GO:0005868;GO:0005874;GO:0005737;GO:0005524	microtubule-based movement;cytoplasmic dynein complex;microtubule;cytoplasm;ATP binding	K10416	DYNC1LI,DNCLI	http://www.genome.jp/dbget-bin/www_bget?ko:K10416	Phagosome;Salmonella infection;Vasopressin-regulated water reabsorption	ko04145,ko05132,ko04962	-	-	sp|O43237|DC1L2_HUMAN	Cytoplasmic dynein 1 light intermediate chain 2 OS=Homo sapiens OX=9606 GN=DYNC1LI2 PE=1 SV=1
novel.16437	952	0.09	0.48	0.2	0.91	0.85	2.46	2.74199	0.0035832	0.0184799	-	TKS65145.1	Metabotropic glutamate receptor 7 [Collichthys lucidus]	GO:0016021;GO:0005886;GO:0004930	integral component of membrane;plasma membrane;G protein-coupled receptor activity	-	-	-	-	-	-	-	-	-
gene5776	973	0.42	0.15	0.3	1.25	1.87	0.64	2.74182	0.00540932	0.0257882	LOC104920985	XP_019114595.1	transcription factor HES-1-B [Larimichthys crocea]	GO:0003677;GO:0006355;GO:0046983	DNA binding;regulation of transcription, DNA-templated;protein dimerization activity	K06054	HES1	http://www.genome.jp/dbget-bin/www_bget?ko:K06054	Notch signaling pathway;Fanconi anemia pathway;Pathways in cancer;Breast cancer;Maturity onset diabetes of the young;Epstein-Barr virus infection;Human papillomavirus infection	ko04330,ko03460,ko05200,ko05224,ko04950,ko05169,ko05165	-	-	sp|Q8AVU4|HES1B_XENLA	Transcription factor HES-1-B OS=Xenopus laevis OX=8355 GN=hes1-b PE=2 SV=1
gene1970	733	2.72	3.16	2.25	6.22	17.21	14.37	2.74156	3.0544e-06	4.86303e-05	LOC104936526	-	-	-	-	-	-	-	-	-	-	-	-	-
gene10665	4718	2.25	1.62	3.07	14.39	4.91	19.43	2.7414	5.05563e-09	1.73488e-07	stam	XP_010738266.3	signal transducing adapter molecule 1 [Larimichthys crocea]	GO:0006886;GO:0031901	intracellular protein transport;early endosome membrane	K04705	STAM	http://www.genome.jp/dbget-bin/www_bget?ko:K04705	Endocytosis;JAK-STAT signaling pathway	ko04144,ko04630	KOG2199	Signal transducing adaptor protein STAM/STAM2	sp|P70297|STAM1_MOUSE	Signal transducing adapter molecule 1 OS=Mus musculus OX=10090 GN=Stam PE=1 SV=3
novel.18843	358	3.46	6.14	3.1	16.6	24.65	14.67	2.74031	0.000254734	0.00204514	-	TMS01351.1	Gastrula zinc finger protein XlCGF49.1 [Larimichthys crocea]	-	-	K06751	MHC1	http://www.genome.jp/dbget-bin/www_bget?ko:K06751	Cellular senescence;Endocytosis;Phagosome;Cell adhesion molecules;Viral carcinogenesis;Viral myocarditis;Type I diabetes mellitus;Allograft rejection;Autoimmune thyroid disease;Graft-versus-host disease;Epstein-Barr virus infection;Herpes simplex virus 1 infection;Human T-cell leukemia virus 1 infection;Human cytomegalovirus infection;Human immunodeficiency virus 1 infection;Human papillomavirus …	ko04218,ko04144,ko04145,ko04514,ko05203,ko05416,ko04940,ko05330,ko05320,ko05332,ko05169,ko05168,ko05166,ko05163,ko05170,ko05165,ko05167,ko04612,ko04650	-	-	-	-
gene8407	1118	0.07	0.25	0.57	1.64	1.61	0.79	2.73662	0.00431738	0.0215096	LOC104923766	XP_027127871.1	ankyrin repeat and SOCS box protein 13 isoform X1 [Larimichthys crocea]	GO:0035556;GO:0016567	intracellular signal transduction;protein ubiquitination	K10335	ASB13	http://www.genome.jp/dbget-bin/www_bget?ko:K10335	-	-	-	-	sp|Q8VBX0|ASB13_MOUSE	Ankyrin repeat and SOCS box protein 13 OS=Mus musculus OX=10090 GN=Asb13 PE=2 SV=1
gene15507	2143	9.52	7.16	13.94	85.71	32.96	24.73	2.7344	7.34896e-06	0.000102811	kbtbd12	XP_010744637.2	kelch repeat and BTB domain-containing protein 12 [Larimichthys crocea]	-	-	K21912	KBTBD12	http://www.genome.jp/dbget-bin/www_bget?ko:K21912	-	-	-	-	sp|Q3ZB90|KBTBC_DANRE	Kelch repeat and BTB domain-containing protein 12 OS=Danio rerio OX=7955 GN=kbtbd12 PE=2 SV=1
gene22374	2346	1.17	6.01	2	7.01	4.76	45	2.73428	0.000129343	0.0011632	LOC104938643	KAE8282717.1	Serine/threonine-protein kinase TAO2 [Larimichthys crocea]	GO:0005524;GO:0004672;GO:0016887	ATP binding;protein kinase activity;ATP hydrolysis activity	K03283	HSPA1s	http://www.genome.jp/dbget-bin/www_bget?ko:K03283	Endocytosis;MAPK signaling pathway;Protein processing in endoplasmic reticulum;Spliceosome;Lipid and atherosclerosis;Legionellosis;Toxoplasmosis;Measles;Prion disease;Longevity regulating pathway - multiple species;Estrogen signaling pathway;Antigen processing and presentation	ko04144,ko04010,ko04141,ko03040,ko05417,ko05134,ko05145,ko05162,ko05020,ko04213,ko04915,ko04612	KOG0101	Molecular chaperones HSP70/HSC70, HSP70 superfamily	sp|Q9I8F9|HSP71_ORYLA	Heat shock 70 kDa protein 1 OS=Oryzias latipes OX=8090 PE=3 SV=1
gene4957	2086	17.27	26.21	28.65	155.05	96.21	87.61	2.73314	1.44445e-08	4.39113e-07	mpp1	KAE8287928.1	55 kDa erythrocyte membrane protein [Larimichthys crocea]	-	-	K21880	MPP1	http://www.genome.jp/dbget-bin/www_bget?ko:K21880	-	-	KOG0609	Calcium/calmodulin-dependent serine protein kinase/membrane-associated guanylate kinase	sp|P49697|EM55_TAKRU	55 kDa erythrocyte membrane protein OS=Takifugu rubripes OX=31033 GN=mpp1 PE=3 SV=1
gene22217	5988	0.67	1.06	1.07	5.13	4.62	3.37	2.73168	3.5194e-08	9.63499e-07	LOC104938475	XP_019118767.2;KAE8289552.1	HEAT repeat-containing protein 5A isoform X1 [Larimichthys crocea];HEAT repeat-containing protein 5A [Larimichthys crocea]	-	-	K24814	HEATR5,LAA1	http://www.genome.jp/dbget-bin/www_bget?ko:K24814	-	-	KOG1822	Uncharacterized conserved protein	sp|Q8JFV4|HTR5A_DANRE	HEAT repeat-containing protein 5A OS=Danio rerio OX=7955 GN=heatr5a PE=2 SV=1
gene13623	1031	12.48	8.06	1.49	19.87	44.52	20.97	2.72994	0.000162875	0.00141177	LOC104929339	KAE8294186.1	hypothetical protein D5F01_LYC07134 [Larimichthys crocea]	GO:0006869;GO:0008289	lipid transport;lipid binding	-	-	-	-	-	-	-	-	-
gene6460	2833	0.86	0.31	0.27	0.98	1.79	6.18	2.72689	3.22326e-05	0.000361683	LOC104921642	XP_019120043.2	prisilkin-39 [Larimichthys crocea]	GO:0016021;GO:0051260;GO:0016020	integral component of membrane;protein homooligomerization;membrane	-	-	-	-	-	-	-	-	-
gene16754	1752	1.92	5.54	9.69	51.24	19.02	11.5	2.72414	0.000291247	0.00229661	LOC104932692	TMS04357.1	Transmembrane protein 41A-A [Larimichthys crocea]	GO:0016021	integral component of membrane	-	-	-	-	-	KOG3140	Predicted membrane protein	sp|Q6NV38|T41AB_DANRE	Transmembrane protein 41A-B OS=Danio rerio OX=7955 GN=tmem41ab PE=2 SV=1
gene21856	1149	0.27	0	0.47	1.41	0.66	1.85	2.72184	0.00631169	0.0291884	LOC104938098	XP_027143417.1;XP_027143426.1	endonuclease domain-containing 1 protein [Larimichthys crocea];endonuclease domain-containing 1 protein-like [Larimichthys crocea]	GO:0003676;GO:0004519;GO:0046872;GO:0016787	nucleic acid binding;endonuclease activity;metal ion binding;hydrolase activity	-	-	-	-	-	-	-	sp|O94919|ENDD1_HUMAN	Endonuclease domain-containing 1 protein OS=Homo sapiens OX=9606 GN=ENDOD1 PE=1 SV=2
gene9963	1667	17.07	20.99	16.51	107.55	47.36	127.11	2.72117	7.73594e-15	9.68008e-13	blmh	XP_035536506.1	bleomycin hydrolase [Morone saxatilis]	GO:0004177;GO:0005737;GO:0004197	aminopeptidase activity;cytoplasm;cysteine-type endopeptidase activity	K01372	BLMH,pepC	http://www.genome.jp/dbget-bin/www_bget?ko:K01372	-	-	-	-	sp|P87362|BLMH_CHICK	Bleomycin hydrolase OS=Gallus gallus OX=9031 GN=BLMH PE=1 SV=1
gene23635	1070	2.46	1.55	2.17	1.87	18.02	5.18	2.72116	0.00106285	0.00679215	LOC104939989	TMS01056.1	hypothetical protein E3U43_016797 [Larimichthys crocea]	-	-	K09614	CORIN	http://www.genome.jp/dbget-bin/www_bget?ko:K09614	-	-	KOG3577	Smoothened and related G-protein-coupled receptors	sp|Q9Z319|CORIN_MOUSE	Atrial natriuretic peptide-converting enzyme OS=Mus musculus OX=10090 GN=Corin PE=2 SV=2
gene22408	1166	15.47	20.53	22.02	99.15	73.04	115.51	2.71427	2.37202e-14	2.53316e-12	LOC104938681	XP_034050543.1;KAE8283863.1	ADP-ribosylation factor 1-like [Thalassophryne amazonica];ADP-ribosylation factor 1 [Larimichthys crocea]	GO:0005525	GTP binding	K07937	ARF1_2	http://www.genome.jp/dbget-bin/www_bget?ko:K07937	Endocytosis;Phospholipase D signaling pathway;Legionellosis;Pathogenic Escherichia coli infection;Salmonella infection;Shigellosis;Vibrio cholerae infection	ko04144,ko04072,ko05134,ko05130,ko05132,ko05131,ko05110	KOG0070	GTP-binding ADP-ribosylation factor Arf1	sp|P84080|ARF1_BOVIN	ADP-ribosylation factor 1 OS=Bos taurus OX=9913 GN=ARF1 PE=1 SV=2
gene8145	1201	24.2	31.31	19.2	256.18	31.62	55.48	2.71215	0.000108555	0.00100244	LOC104923460	-	-	-	-	-	-	-	-	-	-	-	-	-
gene22762	2406	0.44	0.09	0.19	1.63	0.49	1.26	2.70745	0.000338259	0.00260838	LOC104939063	XP_005929477.1;XP_027136758.1	PREDICTED: beta-arrestin-1 isoform X3 [Haplochromis burtoni];beta-arrestin-1 [Larimichthys crocea]	-	-	K04439	ARRB	http://www.genome.jp/dbget-bin/www_bget?ko:K04439	Endocytosis;Hedgehog signaling pathway;MAPK signaling pathway;Chemical carcinogenesis - receptor activation;Morphine addiction;GnRH secretion;Parathyroid hormone synthesis, secretion and action;Relaxin signaling pathway;Chemokine signaling pathway;Dopaminergic synapse;Olfactory transduction	ko04144,ko04340,ko04010,ko05207,ko05032,ko04929,ko04928,ko04926,ko04062,ko04728,ko04740	KOG3865	Arrestin	sp|P17870|ARRB1_BOVIN	Beta-arrestin-1 OS=Bos taurus OX=9913 GN=ARRB1 PE=1 SV=1
gene6331	1598	0.44	0.62	1.11	4.98	2.14	2.24	2.70718	3.77864e-05	0.000413009	fam46c	XP_010732343.1;XP_006808214.1	terminal nucleotidyltransferase 5C [Larimichthys crocea];terminal nucleotidyltransferase 5C isoform X1 [Neolamprologus brichardi]	GO:1990817	RNA adenylyltransferase activity	K23034	TENT5C,FAM46C	http://www.genome.jp/dbget-bin/www_bget?ko:K23034	-	-	KOG3852	Uncharacterized conserved protein	sp|Q7ZUP1|TET5C_DANRE	Terminal nucleotidyltransferase 5C OS=Danio rerio OX=7955 GN=tent5c PE=2 SV=1
gene3432	2803	2.39	0.3	2.57	1.62	2.42	32.15	2.70525	0.002971	0.0158881	LOC104918370	KAE8298291.1	Sodium-coupled monocarboxylate transporter 1 Electrogenic sodium monocarboxylate cotransporter [Larimichthys crocea]	GO:0016021;GO:0022857	integral component of membrane;transmembrane transporter activity	K14388	SLC5A8_12,SMCT	http://www.genome.jp/dbget-bin/www_bget?ko:K14388	-	-	-	-	sp|Q3ZMH1|SC5A8_DANRE	Sodium-coupled monocarboxylate transporter 1 OS=Danio rerio OX=7955 GN=slc5a8 PE=1 SV=1
gene12794	4119	0.72	1.65	2.27	9.77	5	8.37	2.70408	2.5009e-07	5.51757e-06	irs2	XP_010741044.2	insulin receptor substrate 2 [Larimichthys crocea]	GO:0005158;GO:0008286	insulin receptor binding;insulin receptor signaling pathway	K07187	IRS2	http://www.genome.jp/dbget-bin/www_bget?ko:K07187	Autophagy - animal;AMPK signaling pathway;FoxO signaling pathway;cGMP-PKG signaling pathway;MicroRNAs in cancer;Insulin resistance;Non-alcoholic fatty liver disease;Type II diabetes mellitus;Alzheimer disease;Longevity regulating pathway;Longevity regulating pathway - multiple species;Adipocytokine signaling pathway;Growth hormone synthesis, secretion and action;Insulin signaling pathway;Regulati…	ko04140,ko04152,ko04068,ko04022,ko05206,ko04931,ko04932,ko04930,ko05010,ko04211,ko04213,ko04920,ko04935,ko04910,ko04923	-	-	sp|Q9Y4H2|IRS2_HUMAN	Insulin receptor substrate 2 OS=Homo sapiens OX=9606 GN=IRS2 PE=1 SV=2
gene2806	3013	3.61	5.46	8.19	39.31	19.11	24.84	2.70405	1.04972e-07	2.55731e-06	LOC104917681	-	-	-	-	-	-	-	-	-	-	-	-	-
gene9810	2385	3.48	5.32	5.43	28.92	13.89	28.58	2.70275	2.21098e-11	1.29648e-09	faf1	KAE8294195.1	FAS-associated factor 1 [Larimichthys crocea]	GO:0031101;GO:0051216;GO:0060037	fin regeneration;cartilage development;pharyngeal system development	K20703	FAF1	http://www.genome.jp/dbget-bin/www_bget?ko:K20703	Necroptosis;Toll and Imd signaling pathway	ko04217,ko04624	KOG1363	Predicted regulator of the ubiquitin pathway (contains UAS and UBX domains)	sp|P54731|FAF1_MOUSE	FAS-associated factor 1 OS=Mus musculus OX=10090 GN=Faf1 PE=1 SV=2
gene20997	2371	0.82	1.23	1.32	7.27	4.54	3.39	2.70043	1.13672e-06	2.04676e-05	LOC104937186	XP_019113761.1	vacuolar protein sorting-associated protein 4A [Larimichthys crocea]	GO:0007049;GO:0016887;GO:0051301;GO:0005524;GO:0031902	cell cycle;ATP hydrolysis activity;cell division;ATP binding;late endosome membrane	K12196	VPS4	http://www.genome.jp/dbget-bin/www_bget?ko:K12196	Necroptosis;Endocytosis	ko04217,ko04144	KOG0739	AAA+-type ATPase	sp|Q8VEJ9|VPS4A_MOUSE	Vacuolar protein sorting-associated protein 4A OS=Mus musculus OX=10090 GN=Vps4a PE=1 SV=1
gene17158	1746	7.58	4.73	9.51	74.76	18.14	14.58	2.69851	8.96737e-05	0.000855509	LOC104933104	XP_027135156.1;XP_027135158.1;XP_027135157.1;XP_027135160.1	6-phosphofructo-2-kinase/fructose-2,6-bisphosphatase 4 isoform X1 [Larimichthys crocea];6-phosphofructo-2-kinase/fructose-2,6-bisphosphatase 4 isoform X3 [Larimichthys crocea];6-phosphofructo-2-kinase/fructose-2,6-bisphosphatase 4 isoform X2 [Larimichthys crocea];6-phosphofructo-2-kinase/fructose-2,6-bisphosphatase 4 isoform X5 [Larimichthys crocea]	GO:0004331;GO:0003873;GO:0005524;GO:0006000;GO:0006003	fructose-2,6-bisphosphate 2-phosphatase activity;6-phosphofructo-2-kinase activity;ATP binding;fructose metabolic process;fructose 2,6-bisphosphate metabolic process	K19030	PFKFB4	http://www.genome.jp/dbget-bin/www_bget?ko:K19030	AMPK signaling pathway;Fructose and mannose metabolism	ko04152,ko00051	KOG0234	Fructose-6-phosphate 2-kinase/fructose-2,6-biphosphatase	sp|Q16877|F264_HUMAN	6-phosphofructo-2-kinase/fructose-2,6-bisphosphatase 4 OS=Homo sapiens OX=9606 GN=PFKFB4 PE=1 SV=6
gene7242	4336	4.21	7.08	7.01	13.23	18.31	69.99	2.68318	6.54692e-08	1.67396e-06	lamb3	TMS19314.1;XP_010733620.2	Laminin subunit beta-3 [Larimichthys crocea];laminin subunit beta-3 [Larimichthys crocea]	-	-	K06244	LAMB3	http://www.genome.jp/dbget-bin/www_bget?ko:K06244	Focal adhesion;PI3K-Akt signaling pathway;ECM-receptor interaction;Pathways in cancer;Small cell lung cancer;Amoebiasis;Toxoplasmosis;Human papillomavirus infection	ko04510,ko04151,ko04512,ko05200,ko05222,ko05146,ko05145,ko05165	KOG0994	Extracellular matrix glycoprotein Laminin subunit beta	sp|Q13751|LAMB3_HUMAN	Laminin subunit beta-3 OS=Homo sapiens OX=9606 GN=LAMB3 PE=1 SV=1
novel.20458	1104	0.14	0.32	0.5	0.62	1.2	3.42	2.68095	0.00190173	0.0110448	-	-	-	-	-	-	-	-	-	-	-	-	-	-
gene18312	1459	24.18	29.72	25.94	150.56	96.75	124.94	2.67838	6.68864e-13	5.41561e-11	adrm1	XP_027144170.1;KAE8292645.1	proteasomal ubiquitin receptor ADRM1-like isoform X2 [Larimichthys crocea];Proteasomal ubiquitin receptor ADRM1 [Larimichthys crocea]	GO:0005737;GO:0005634;GO:0000502	cytoplasm;nucleus;proteasome complex	K06691	RPN13	http://www.genome.jp/dbget-bin/www_bget?ko:K06691	Proteasome;Epstein-Barr virus infection;Alzheimer disease;Amyotrophic lateral sclerosis;Huntington disease;Parkinson disease;Pathways of neurodegeneration - multiple diseases;Prion disease;Spinocerebellar ataxia	ko03050,ko05169,ko05010,ko05014,ko05016,ko05012,ko05022,ko05020,ko05017	KOG3037	Cell membrane glycoprotein	sp|Q6NZ09|ADRM1_DANRE	Proteasomal ubiquitin receptor ADRM1 OS=Danio rerio OX=7955 GN=adrm1b PE=1 SV=1
gene9300	4047	2.04	3.17	3.69	16.22	11.13	16.16	2.67413	4.31109e-11	2.32199e-09	wwp1	KAE8280069.1	NEDD4-like E3 ubiquitin-protein ligase WWP1 [Larimichthys crocea]	GO:0061630;GO:0006511	ubiquitin protein ligase activity;ubiquitin-dependent protein catabolic process	K05633	WWP1,AIP5	http://www.genome.jp/dbget-bin/www_bget?ko:K05633	Endocytosis;Ubiquitin mediated proteolysis	ko04144,ko04120	KOG0940	Ubiquitin protein ligase RSP5/NEDD4	sp|Q9H0M0|WWP1_HUMAN	NEDD4-like E3 ubiquitin-protein ligase WWP1 OS=Homo sapiens OX=9606 GN=WWP1 PE=1 SV=1
gene13981	2859	4.52	0.25	0.51	2.48	13.23	4.74	2.67093	0.00555934	0.026321	LOC104929717	XP_010742601.1	uncharacterized protein LOC104929717 [Larimichthys crocea]	-	-	-	-	-	-	-	-	-	-	-
gene5659	2730	0.41	1.69	1.97	7.2	6.33	4.7	2.67073	3.05475e-05	0.000345276	kpna6	XP_010731447.1	importin subunit alpha-7 [Larimichthys crocea]	GO:0006606;GO:0061608;GO:0005737	protein import into nucleus;nuclear import signal receptor activity;cytoplasm	K15042	KPNA5_6	http://www.genome.jp/dbget-bin/www_bget?ko:K15042	Nucleocytoplasmic transport;Chemical carcinogenesis - receptor activation;Influenza A	ko03013,ko05207,ko05164	KOG0166	Karyopherin (importin) alpha	sp|Q0V7M0|IMA7_BOVIN	Importin subunit alpha-7 OS=Bos taurus OX=9913 GN=KPNA6 PE=2 SV=1
gene4106	3307	3.15	3.34	2.79	29.11	6.13	7.16	2.66793	1.51271e-05	0.000189862	slain2	KAE8294493.1;XP_019133842.2;XP_019133843.2	SLAIN motif-containing protein 2 [Larimichthys crocea];SLAIN motif-containing protein 2 isoform X3 [Larimichthys crocea];SLAIN motif-containing protein 2 isoform X5 [Larimichthys crocea]	-	-	K16580	SLAIN1_2	http://www.genome.jp/dbget-bin/www_bget?ko:K16580	-	-	-	-	sp|Q3MHV6|SLAI2_BOVIN;sp|Q9P270|SLAI2_HUMAN	SLAIN motif-containing protein 2 OS=Bos taurus OX=9913 GN=SLAIN2 PE=2 SV=1;SLAIN motif-containing protein 2 OS=Homo sapiens OX=9606 GN=SLAIN2 PE=1 SV=2
gene21930	1820	1.47	1.02	1.31	6.51	4.25	7.41	2.66592	1.70367e-10	8.21522e-09	thnsl2	TMS08319.1	Threonine synthase-like 2 [Larimichthys crocea]	-	-	K06037	THNSL2	http://www.genome.jp/dbget-bin/www_bget?ko:K06037	-	-	KOG2616	Pyridoxalphosphate-dependent enzyme/predicted threonine synthase	sp|Q2YDP8|THNS2_DANRE	Threonine synthase-like 2 OS=Danio rerio OX=7955 GN=thnsl2 PE=2 SV=1
gene21117	3570	3.27	5.25	2.1	7.14	18.13	24.37	2.66549	1.87324e-07	4.2815e-06	osgin2	XP_010751817.3	oxidative stress-induced growth inhibitor 2 [Larimichthys crocea]	GO:0043065;GO:0030308	positive regulation of apoptotic process;negative regulation of cell growth	-	-	-	-	-	-	-	sp|Q9Y236|OSGI2_HUMAN	Oxidative stress-induced growth inhibitor 2 OS=Homo sapiens OX=9606 GN=OSGIN2 PE=2 SV=1
gene5582	2507	4.41	5.29	7.76	14.53	39.88	21.58	2.66451	3.45715e-06	5.37692e-05	LOC104920701	TMS22012.1;XP_010731345.1	Potassium voltage-gated channel subfamily A member 2 [Larimichthys crocea];potassium voltage-gated channel subfamily A member 7 [Larimichthys crocea]	GO:0005249;GO:0008076;GO:0034765;GO:0051260	voltage-gated potassium channel activity;voltage-gated potassium channel complex;regulation of ion transmembrane transport;protein homooligomerization	K04880	KCNA7,KV1.7	http://www.genome.jp/dbget-bin/www_bget?ko:K04880	-	-	-	-	sp|P16390|KCNA3_MOUSE	Potassium voltage-gated channel subfamily A member 3 OS=Mus musculus OX=10090 GN=Kcna3 PE=1 SV=3
gene11436	1638	4.27	3.07	3.67	33.93	7.46	7.9	2.66277	5.32405e-05	0.000550997	LOC104926981	XP_019127026.2	N-acyl-aromatic-L-amino acid amidohydrolase (carboxylate-forming) B [Larimichthys crocea]	GO:0046872;GO:0016788;GO:0016811	metal ion binding;hydrolase activity, acting on ester bonds;hydrolase activity, acting on carbon-nitrogen (but not peptide) bonds, in linear amides	K18458	ACY3	http://www.genome.jp/dbget-bin/www_bget?ko:K18458	-	-	-	-	sp|Q6DHQ3|ACY3B_DANRE	N-acyl-aromatic-L-amino acid amidohydrolase (carboxylate-forming) B OS=Danio rerio OX=7955 GN=acy3.2 PE=2 SV=1
gene15119	812	11.49	15.27	13.05	80.23	45.72	54.09	2.66049	7.34413e-10	3.09453e-08	dctn6	XP_019111996.1	dynactin subunit 6 [Larimichthys crocea]	GO:0005869;GO:0005737	dynactin complex;cytoplasm	K10428	DCTN6	http://www.genome.jp/dbget-bin/www_bget?ko:K10428	Salmonella infection;Amyotrophic lateral sclerosis;Huntington disease;Pathways of neurodegeneration - multiple diseases;Vasopressin-regulated water reabsorption	ko05132,ko05014,ko05016,ko05022,ko04962	-	-	sp|Q502J7|DCTN6_DANRE	Dynactin subunit 6 OS=Danio rerio OX=7955 GN=dctn6 PE=2 SV=1
gene12980	908	6.65	11.44	6.63	38.16	35.42	36.67	2.66036	5.58435e-10	2.41884e-08	psma6	TKS86306.1	Proteasome subunit alpha type-6 [Collichthys lucidus]	GO:0019773;GO:0005634;GO:0005737;GO:0006511	proteasome core complex, alpha-subunit complex;nucleus;cytoplasm;ubiquitin-dependent protein catabolic process	K02730	PSMA6	http://www.genome.jp/dbget-bin/www_bget?ko:K02730	Proteasome;Alzheimer disease;Amyotrophic lateral sclerosis;Huntington disease;Parkinson disease;Pathways of neurodegeneration - multiple diseases;Prion disease;Spinocerebellar ataxia	ko03050,ko05010,ko05014,ko05016,ko05012,ko05022,ko05020,ko05017	KOG0182	20S proteasome, regulatory subunit alpha type PSMA6/SCL1	sp|Q2YDE4|PSA6_BOVIN	Proteasome subunit alpha type-6 OS=Bos taurus OX=9913 GN=PSMA6 PE=1 SV=1
gene12223	1715	1.65	1.27	1.44	13.25	2.43	4.07	2.65838	6.38939e-05	0.000647283	LOC104927869	KAE8300849.1	Cartilage acidic protein 1 ASPIC Precursor [Larimichthys crocea]	-	-	-	-	-	-	-	-	-	sp|Q0V9M0|CRAC1_XENTR	Cartilage acidic protein 1 OS=Xenopus tropicalis OX=8364 GN=crtac1 PE=2 SV=2
gene17268	1811	0.84	0.15	0.26	2.38	1.46	2.49	2.65778	0.000223706	0.00183832	LOC104933219	XP_010746912.1;XP_027139174.1	solute carrier family 41 member 1 isoform X1 [Larimichthys crocea];solute carrier family 41 member 1 isoform X2 [Larimichthys crocea]	GO:0016021;GO:0008324	integral component of membrane;cation transmembrane transporter activity	K15122	SLC41A	http://www.genome.jp/dbget-bin/www_bget?ko:K15122	-	-	KOG3788	Predicted divalent cation transporter	sp|Q8BJA2|S41A1_MOUSE	Solute carrier family 41 member 1 OS=Mus musculus OX=10090 GN=Slc41a1 PE=2 SV=1
gene16423	1580	1.5	1.36	0.74	2.41	3.81	13.09	2.65441	2.00585e-06	3.35111e-05	rab20	XP_010745823.3	ras-related protein Rab-20 [Larimichthys crocea]	GO:0005525;GO:0003924	GTP binding;GTPase activity	K07911	RAB20	http://www.genome.jp/dbget-bin/www_bget?ko:K07911	-	-	KOG0078	GTP-binding protein SEC4, small G protein superfamily, and related Ras family GTP-binding proteins	sp|P35295|RAB20_MOUSE	Ras-related protein Rab-20 OS=Mus musculus OX=10090 GN=Rab20 PE=2 SV=2
gene7167	1454	7.27	4.48	11.39	41.28	25.42	49.67	2.65425	1.13853e-08	3.57065e-07	cystm1	XP_010733537.1	cysteine-rich and transmembrane domain-containing protein 1 [Larimichthys crocea]	GO:0016021	integral component of membrane	-	-	-	-	-	-	-	sp|Q32LK2|CYTM1_BOVIN	Cysteine-rich and transmembrane domain-containing protein 1 OS=Bos taurus OX=9913 GN=CYSTM1 PE=3 SV=1
gene6572	5876	8.84	4.87	19.31	79.2	22.86	67.6	2.65406	1.16457e-05	0.000151621	lpin1	KAE8297260.1;XP_027137408.1	Phosphatidate phosphatase LPIN1 [Larimichthys crocea];phosphatidate phosphatase LPIN1 isoform X2 [Larimichthys crocea]	GO:0008195;GO:0006357;GO:0019432;GO:0009062	phosphatidate phosphatase activity;regulation of transcription by RNA polymerase II;triglyceride biosynthetic process;fatty acid catabolic process	K15728	LPIN	http://www.genome.jp/dbget-bin/www_bget?ko:K15728	mTOR signaling pathway;Alcoholic liver disease;Glycerolipid metabolism;Glycerophospholipid metabolism	ko04150,ko04936,ko00561,ko00564	KOG2116	Protein involved in plasmid maintenance/nuclear protein involved in lipid metabolism	sp|Q91ZP3|LPIN1_MOUSE	Phosphatidate phosphatase LPIN1 OS=Mus musculus OX=10090 GN=Lpin1 PE=1 SV=1
gene11324	7584	2.13	0.66	1.16	2.98	3.6	15.57	2.65287	3.11396e-06	4.93689e-05	LOC104926867	XP_030256660.1;XP_019128665.2	uncharacterized protein LOC115571396 [Sparus aurata];uncharacterized protein LOC104926867 isoform X2 [Larimichthys crocea]	GO:0005886	plasma membrane	-	-	-	-	-	-	-	sp|P97797|SHPS1_MOUSE	Tyrosine-protein phosphatase non-receptor type substrate 1 OS=Mus musculus OX=10090 GN=Sirpa PE=1 SV=2
gene20472	909	4.68	4.99	3.23	20.75	18.25	16.8	2.64314	1.4725e-08	4.47091e-07	gins3	KAE8295821.1;XP_010750995.1	DNA replication complex GINS protein PSF3 GINS complex subunit 3 [Larimichthys crocea];DNA replication complex GINS protein PSF3 [Larimichthys crocea]	GO:0000811;GO:0006260;GO:0007507	GINS complex;DNA replication;heart development	K10734	GINS3	http://www.genome.jp/dbget-bin/www_bget?ko:K10734	-	-	-	-	sp|Q7ZT01|PSF3_XENLA;sp|Q9BRX5|PSF3_HUMAN	DNA replication complex GINS protein PSF3 OS=Xenopus laevis OX=8355 GN=gins3 PE=1 SV=1;DNA replication complex GINS protein PSF3 OS=Homo sapiens OX=9606 GN=GINS3 PE=1 SV=1
gene2941	2742	11.65	11.99	16.92	108.47	33.39	40.72	2.63905	2.26425e-06	3.73248e-05	zfand5	XP_019115031.2	AN1-type zinc finger protein 5 isoform X1 [Larimichthys crocea]	GO:0008270;GO:0003677	zinc ion binding;DNA binding	K24687	ZFAND5_6	http://www.genome.jp/dbget-bin/www_bget?ko:K24687	-	-	KOG3173	Predicted Zn-finger protein	sp|O88878|ZFAN5_MOUSE	AN1-type zinc finger protein 5 OS=Mus musculus OX=10090 GN=Zfand5 PE=1 SV=1
gene17270	1289	1.46	0.58	0.48	3.04	4.38	3.24	2.63776	4.5096e-05	0.000477887	LOC104933220	TKS71077.1	Phosphatase and actin regulator 3 [Collichthys lucidus]	GO:0008157;GO:0004864;GO:0003779;GO:0019888	protein phosphatase 1 binding;protein phosphatase inhibitor activity;actin binding;protein phosphatase regulator activity	K17594	PHACTR	http://www.genome.jp/dbget-bin/www_bget?ko:K17594	-	-	-	-	sp|Q501J7|PHAR4_MOUSE	Phosphatase and actin regulator 4 OS=Mus musculus OX=10090 GN=Phactr4 PE=1 SV=2
gene16794	1984	3.75	4.56	4.93	20.29	17.09	23.98	2.63594	4.67259e-13	3.91108e-11	kcmf1	XP_010746339.1	E3 ubiquitin-protein ligase KCMF1 [Larimichthys crocea]	GO:0008270;GO:0061630	zinc ion binding;ubiquitin protein ligase activity	K22376	KCMF1,FIGC	http://www.genome.jp/dbget-bin/www_bget?ko:K22376	-	-	KOG1280	Uncharacterized conserved protein containing ZZ-type Zn-finger	sp|Q7T321|KCMF1_DANRE	E3 ubiquitin-protein ligase KCMF1 OS=Danio rerio OX=7955 GN=kcmf1 PE=2 SV=1
gene12844	2359	2.33	3.3	2.09	16.52	4.82	16.23	2.63549	8.87606e-09	2.84493e-07	yif1b	XP_010741103.1;XP_010741104.1	protein YIF1B isoform X1 [Larimichthys crocea];protein YIF1B isoform X2 [Larimichthys crocea]	GO:0015031;GO:0006888;GO:0016021;GO:0005794;GO:0005789	protein transport;endoplasmic reticulum to Golgi vesicle-mediated transport;integral component of membrane;Golgi apparatus;endoplasmic reticulum membrane	K20362	YIF1	http://www.genome.jp/dbget-bin/www_bget?ko:K20362	-	-	KOG3094	Predicted membrane protein	sp|Q5U3G6|YIF1B_DANRE	Protein YIF1B OS=Danio rerio OX=7955 GN=yif1b PE=2 SV=2
gene889	3575	1.9	1.72	1.02	9.03	3.42	10.03	2.63537	3.96976e-10	1.77857e-08	camlg	XP_010735937.1	calcium signal-modulating cyclophilin ligand [Larimichthys crocea]	GO:0016021	integral component of membrane	K22385	CAMLG	http://www.genome.jp/dbget-bin/www_bget?ko:K22385	-	-	-	-	sp|P49069|CAMLG_HUMAN	Guided entry of tail-anchored proteins factor CAMLG OS=Homo sapiens OX=9606 GN=CAMLG PE=1 SV=1
gene7586	4061	7.65	3.21	4.89	13.1	6.91	74.47	2.63474	2.51097e-05	0.000293176	scarf1	XP_010734127.3	scavenger receptor class F member 1 [Larimichthys crocea]	GO:0006898;GO:0016021;GO:0005044	receptor-mediated endocytosis;integral component of membrane;scavenger receptor activity	K24318	SCARF1	http://www.genome.jp/dbget-bin/www_bget?ko:K24318	-	-	-	-	sp|Q14162|SREC_HUMAN	Scavenger receptor class F member 1 OS=Homo sapiens OX=9606 GN=SCARF1 PE=1 SV=3
gene21113	1046	5.99	6.99	4.84	30.63	15.08	40.88	2.63428	3.4345e-13	2.97529e-11	pmvk	XP_019120157.1	phosphomevalonate kinase [Larimichthys crocea]	GO:0004631;GO:0005524;GO:0005829;GO:0006695;GO:0019287	phosphomevalonate kinase activity;ATP binding;cytosol;cholesterol biosynthetic process;isopentenyl diphosphate biosynthetic process, mevalonate pathway	K13273	PMVK	http://www.genome.jp/dbget-bin/www_bget?ko:K13273	Peroxisome;Terpenoid backbone biosynthesis	ko04146,ko00900	-	-	sp|Q2KIU2|PMVK_BOVIN	Phosphomevalonate kinase OS=Bos taurus OX=9913 GN=PMVK PE=2 SV=3
gene7570	597	96.93	83.39	54.98	446.4	165.16	517.2	2.63145	4.29938e-11	2.32199e-09	shfm1	KAF1381486.1	hypothetical protein PFLUV_G00154470 [Perca fluviatilis]	GO:0008541;GO:0043248;GO:0006406	proteasome regulatory particle, lid subcomplex;proteasome assembly;mRNA export from nucleus	K10881	SHFM1,DSS1,RPN15	http://www.genome.jp/dbget-bin/www_bget?ko:K10881	Proteasome;Homologous recombination;Epstein-Barr virus infection;Alzheimer disease;Amyotrophic lateral sclerosis;Huntington disease;Parkinson disease;Pathways of neurodegeneration - multiple diseases;Prion disease;Spinocerebellar ataxia	ko03050,ko03440,ko05169,ko05010,ko05014,ko05016,ko05012,ko05022,ko05020,ko05017	KOG4764	Uncharacterized conserved protein	sp|Q3ZBR6|SEM1_BOVIN	26S proteasome complex subunit SEM1 OS=Bos taurus OX=9913 GN=SEM1 PE=3 SV=1
gene3007	5199	3.76	3.86	3.51	22.62	11.89	15.78	2.63138	5.86576e-11	3.07252e-09	usp38	XP_019111617.1	ubiquitin carboxyl-terminal hydrolase 38 [Larimichthys crocea]	GO:0004843;GO:0006511;GO:0016579	thiol-dependent deubiquitinase;ubiquitin-dependent protein catabolic process;protein deubiquitination	K11854	USP35_38	http://www.genome.jp/dbget-bin/www_bget?ko:K11854	-	-	KOG1864	Ubiquitin-specific protease	sp|Q8NB14|UBP38_HUMAN	Ubiquitin carboxyl-terminal hydrolase 38 OS=Homo sapiens OX=9606 GN=USP38 PE=1 SV=2
gene7644	1243	1.04	1.05	1.64	6.43	2.49	10.25	2.62668	5.91559e-07	1.15762e-05	LOC104922913	XP_010734176.1	desumoylating isopeptidase 1 [Larimichthys crocea]	GO:0008233	peptidase activity	K22762	DESI1,PPPDE2	http://www.genome.jp/dbget-bin/www_bget?ko:K22762	-	-	KOG0324	Uncharacterized conserved protein	sp|Q9CQT7|DESI1_MOUSE	Desumoylating isopeptidase 1 OS=Mus musculus OX=10090 GN=Desi1 PE=1 SV=1
gene20367	2154	4.48	6.23	21.22	50.03	39.66	66.84	2.62431	1.79215e-05	0.000219813	lrrc2	TMS01313.1;XP_019109828.1	Leucine-rich repeat-containing protein 2 [Larimichthys crocea];leucine-rich repeat-containing protein 2 isoform X1 [Larimichthys crocea]	-	-	-	-	-	-	-	-	-	sp|Q9BYS8|LRRC2_HUMAN	Leucine-rich repeat-containing protein 2 OS=Homo sapiens OX=9606 GN=LRRC2 PE=2 SV=2
gene7135	949	1.32	0.8	1.02	1.22	3.1	13.03	2.62261	0.000380096	0.00287813	crabp1	XP_010733490.1	cellular retinoic acid-binding protein 1 [Larimichthys crocea]	GO:0001972;GO:0005737;GO:0034653	retinoic acid binding;cytoplasm;retinoic acid catabolic process	K17337	CRABP1	http://www.genome.jp/dbget-bin/www_bget?ko:K17337	-	-	KOG4015	Fatty acid-binding protein FABP	sp|O42386|RABP1_TAKRU	Cellular retinoic acid-binding protein 1 OS=Takifugu rubripes OX=31033 GN=crabp1 PE=3 SV=3
gene17094	2465	5.33	3.14	6.37	13.68	20.7	38.73	2.6203	9.67066e-09	3.06787e-07	LOC104933055	XP_010746715.1	ADP-ribosylation factor-like protein 4A [Larimichthys crocea]	GO:0005525	GTP binding	K07945	ARL4	http://www.genome.jp/dbget-bin/www_bget?ko:K07945	-	-	KOG0070	GTP-binding ADP-ribosylation factor Arf1	sp|Q3T0M9|ARL4A_BOVIN	ADP-ribosylation factor-like protein 4A OS=Bos taurus OX=9913 GN=ARL4A PE=2 SV=1
gene9037	1056	8.3	9.33	3.25	51.26	27.81	22.15	2.61913	2.06877e-06	3.44461e-05	hoxd9	XP_010736075.1	homeobox protein Hox-D9a [Larimichthys crocea]	GO:0000981;GO:0003677;GO:0006351;GO:0005634;GO:0007275	DNA-binding transcription factor activity, RNA polymerase II-specific;DNA binding;transcription, DNA-templated;nucleus;multicellular organism development	K09294	HOX_9	http://www.genome.jp/dbget-bin/www_bget?ko:K09294	-	-	-	-	sp|Q1KKS9|HXD9A_TAKRU	Homeobox protein Hox-D9a OS=Takifugu rubripes OX=31033 GN=hoxd9a PE=3 SV=1
gene6752	732	8.18	8.44	8.71	49.34	17.59	55.8	2.61687	8.68981e-10	3.5943e-08	LOC104921968	XP_019122879.2	PRA1 family protein 3 [Larimichthys crocea]	GO:0016021	integral component of membrane	K20393	ARL6IP5,PRAF3	http://www.genome.jp/dbget-bin/www_bget?ko:K20393	-	-	-	-	sp|Q5F433|PRAF3_CHICK	PRA1 family protein 3 OS=Gallus gallus OX=9031 GN=ARL6IP5 PE=2 SV=1
gene18183	1731	2.85	0.74	1.23	6.02	3.27	16.11	2.6134	7.46246e-06	0.000104105	uchl1	TMS23247.1	Ubiquitin carboxyl-terminal hydrolase isozyme L1 [Larimichthys crocea]	GO:0005789;GO:0016874;GO:0016579;GO:0006511;GO:0004843	endoplasmic reticulum membrane;ligase activity;protein deubiquitination;ubiquitin-dependent protein catabolic process;thiol-dependent deubiquitinase	K05611	UCHL1	http://www.genome.jp/dbget-bin/www_bget?ko:K05611	Parkinson disease;Pathways of neurodegeneration - multiple diseases	ko05012,ko05022	KOG1415	Ubiquitin C-terminal hydrolase UCHL1	sp|P09936|UCHL1_HUMAN	Ubiquitin carboxyl-terminal hydrolase isozyme L1 OS=Homo sapiens OX=9606 GN=UCHL1 PE=1 SV=2
gene13835	4816	1.13	0.45	0.84	2.84	1.36	9.23	2.61255	3.05898e-06	4.86452e-05	mrc1	KAE8279781.1	Macrophage mannose receptor 1 [Larimichthys crocea]	GO:0030246;GO:0006897;GO:0016021	carbohydrate binding;endocytosis;integral component of membrane	K06560	MRC,CD206,CD280	http://www.genome.jp/dbget-bin/www_bget?ko:K06560	Phagosome;Tuberculosis	ko04145,ko05152	-	-	sp|Q61830|MRC1_MOUSE	Macrophage mannose receptor 1 OS=Mus musculus OX=10090 GN=Mrc1 PE=1 SV=2
gene15206	1301	1.24	0.82	0.98	3.83	1.23	11.19	2.60988	2.1379e-05	0.000255887	LOC104931020	XP_020482813.1	monofunctional C1-tetrahydrofolate synthase, mitochondrial-like [Labrus bergylta]	GO:0005524;GO:0004329;GO:0004488;GO:0035999	ATP binding;formate-tetrahydrofolate ligase activity;methylenetetrahydrofolate dehydrogenase (NADP+) activity;tetrahydrofolate interconversion	K13402	MTHFD1L	http://www.genome.jp/dbget-bin/www_bget?ko:K13402	One carbon pool by folate	ko00670	KOG4230	C1-tetrahydrofolate synthase	sp|Q0VCR7|C1TM_BOVIN	Monofunctional C1-tetrahydrofolate synthase, mitochondrial OS=Bos taurus OX=9913 GN=MTHFD1L PE=2 SV=2
novel.1490	357	2.91	2.1	4.17	16.99	13.57	2.49	2.60954	0.0107567	0.0447086	SIX2	TMS04200.1	Homeobox protein SIX2 [Larimichthys crocea]	GO:0005634;GO:0007275;GO:0000981;GO:0003677;GO:0048793	nucleus;multicellular organism development;DNA-binding transcription factor activity, RNA polymerase II-specific;DNA binding;pronephros development	K19472	SIX2	http://www.genome.jp/dbget-bin/www_bget?ko:K19472	-	-	-	-	sp|Q9NPC8|SIX2_HUMAN	Homeobox protein SIX2 OS=Homo sapiens OX=9606 GN=SIX2 PE=1 SV=1
gene6085	1924	105.94	116.3	73.81	406.68	211.99	546.95	2.60894	2.56766e-15	3.59414e-13	LOC104921222	KAE8292252.1	Transitional endoplasmic reticulum ATPase [Larimichthys crocea]	GO:0043009;GO:0005524;GO:0007626;GO:0006914;GO:0032434;GO:0008289;GO:0007049;GO:0016787;GO:0010506;GO:0016887	chordate embryonic development;ATP binding;locomotory behavior;autophagy;regulation of proteasomal ubiquitin-dependent protein catabolic process;lipid binding;cell cycle;hydrolase activity;regulation of autophagy;ATP hydrolysis activity	K13525	VCP,CDC48	http://www.genome.jp/dbget-bin/www_bget?ko:K13525	Protein processing in endoplasmic reticulum;Legionellosis;Amyotrophic lateral sclerosis;Pathways of neurodegeneration - multiple diseases	ko04141,ko05134,ko05014,ko05022	KOG0730	AAA+-type ATPase	sp|Q7ZU99|TERA_DANRE	Transitional endoplasmic reticulum ATPase OS=Danio rerio OX=7955 GN=vcp PE=1 SV=1
gene16428	4640	1.51	1.31	2.5	7.99	4.69	14.26	2.60341	1.70804e-09	6.5407e-08	LOC104932343	XP_010745835.3	serine/threonine-protein kinase SIK2 [Larimichthys crocea]	GO:0005524;GO:0106310;GO:0106311	ATP binding;protein serine kinase activity;protein serine/threonine kinase activity	K19008	SIK1	http://www.genome.jp/dbget-bin/www_bget?ko:K19008	Glucagon signaling pathway	ko04922	-	-	sp|Q9IA88|SIK2_CHICK	Serine/threonine-protein kinase SIK2 OS=Gallus gallus OX=9031 GN=SIK2 PE=2 SV=1
gene3755	2305	4.12	5.72	5.61	18.37	22.87	27.8	2.59971	2.69823e-11	1.53329e-09	LOC104918713	KAE8283369.1	UNC93-like protein MFSD11 Major facilitator superfamily domain-containing protein 11 Protein ET [Larimichthys crocea]	GO:0016021	integral component of membrane	-	-	-	-	-	-	-	sp|O43934|MFS11_HUMAN	UNC93-like protein MFSD11 OS=Homo sapiens OX=9606 GN=MFSD11 PE=1 SV=2
gene20107	2034	0.81	0.26	0.99	2.28	2.74	4.54	2.5992	5.32422e-06	7.72776e-05	LOC104936281	XP_027146025.1;KAE8294630.1	complement factor H [Larimichthys crocea];Complement factor H-related protein 5 [Larimichthys crocea]	-	-	K04004	CFH,HF1	http://www.genome.jp/dbget-bin/www_bget?ko:K04004	Staphylococcus aureus infection;Complement and coagulation cascades	ko05150,ko04610	-	-	sp|P06909|CFAH_MOUSE;sp|P08603|CFAH_HUMAN	Complement factor H OS=Mus musculus OX=10090 GN=Cfh PE=1 SV=2;Complement factor H OS=Homo sapiens OX=9606 GN=CFH PE=1 SV=4
gene18313	637	1.64	3.4	3.4	18.61	5.62	14.92	2.59797	1.37373e-05	0.00017472	LOC104934344	XP_027144200.1	dnaJ homolog subfamily C member 5 [Larimichthys crocea]	-	-	K09525	DNAJC5	http://www.genome.jp/dbget-bin/www_bget?ko:K09525	Protein processing in endoplasmic reticulum	ko04141	KOG0716	Molecular chaperone (DnaJ superfamily)	sp|P56101|DNJC5_TETCF	DnaJ homolog subfamily C member 5 OS=Tetronarce californica OX=7787 GN=dnajc5 PE=1 SV=1
gene17711	3013	11.72	7.55	12.38	59.58	29.58	56.53	2.59658	2.06356e-10	9.83207e-09	rab12	XP_019130071.1	ras-related protein Rab-12 [Larimichthys crocea]	GO:0003924;GO:0032482;GO:0005525	GTPase activity;Rab protein signal transduction;GTP binding	K07907	RAB12	http://www.genome.jp/dbget-bin/www_bget?ko:K07907	-	-	KOG0078	GTP-binding protein SEC4, small G protein superfamily, and related Ras family GTP-binding proteins	sp|P35284|RAB12_RAT;sp|P35283|RAB12_MOUSE	Ras-related protein Rab-12 OS=Rattus norvegicus OX=10116 GN=Rab12 PE=1 SV=2;Ras-related protein Rab-12 OS=Mus musculus OX=10090 GN=Rab12 PE=1 SV=3
gene739	1721	10.41	2.15	5.54	11.3	17.08	68.88	2.59624	4.60789e-05	0.000486637	rrad	XP_019116206.1	GTP-binding protein RAD [Larimichthys crocea]	GO:0007165;GO:0016020;GO:0003925;GO:0005246;GO:0005525;GO:1901842	signal transduction;membrane;G protein activity;calcium channel regulator activity;GTP binding;negative regulation of high voltage-gated calcium channel activity	K07845	RRAD,RAD1	http://www.genome.jp/dbget-bin/www_bget?ko:K07845	-	-	-	-	sp|O88667|RAD_MOUSE	GTP-binding protein RAD OS=Mus musculus OX=10090 GN=Rrad PE=1 SV=1
gene5573	2328	2.42	1.07	3.77	10.97	9.84	12.34	2.59571	1.45923e-06	2.55324e-05	dyrk4	TMS05881.1	Dual specificity tyrosine-phosphorylation-regulated kinase 4 [Larimichthys crocea]	GO:0004712;GO:0005524;GO:0106311;GO:0004714;GO:0106310	protein serine/threonine/tyrosine kinase activity;ATP binding;protein serine/threonine kinase activity;transmembrane receptor protein tyrosine kinase activity;protein serine kinase activity	K18669	DYRK2_3_4	http://www.genome.jp/dbget-bin/www_bget?ko:K18669	-	-	KOG0667	Dual-specificity tyrosine-phosphorylation regulated kinase	sp|Q9NR20|DYRK4_HUMAN	Dual specificity tyrosine-phosphorylation-regulated kinase 4 OS=Homo sapiens OX=9606 GN=DYRK4 PE=1 SV=2
gene7618	2968	6.06	13.39	12.47	54.77	39.94	53.94	2.59533	3.4269e-12	2.35194e-10	LOC104922891	XP_010734145.1	AN1-type zinc finger protein 5 [Larimichthys crocea]	GO:0008270;GO:0003677	zinc ion binding;DNA binding	-	-	-	-	-	KOG3173	Predicted Zn-finger protein	sp|O88878|ZFAN5_MOUSE	AN1-type zinc finger protein 5 OS=Mus musculus OX=10090 GN=Zfand5 PE=1 SV=1
gene9911	5601	2.17	2.08	2.35	2.57	10.03	19.86	2.59359	5.42837e-06	7.85132e-05	LOC104925362	XP_010737268.3	multidrug resistance-associated protein 5 [Larimichthys crocea]	GO:0042626;GO:0016021;GO:0005524;GO:0008514	ATPase-coupled transmembrane transporter activity;integral component of membrane;ATP binding;organic anion transmembrane transporter activity	K05668	ABCC5	http://www.genome.jp/dbget-bin/www_bget?ko:K05668	ABC transporters;Antifolate resistance	ko02010,ko01523	-	-	sp|O15440|MRP5_HUMAN	Multidrug resistance-associated protein 5 OS=Homo sapiens OX=9606 GN=ABCC5 PE=1 SV=2
gene6731	1225	0.5	1.07	1.6	4.44	3.25	7.63	2.59222	3.12805e-06	4.95211e-05	LOC104921958	XP_010732951.3	prostaglandin E2 receptor EP1 subtype [Larimichthys crocea]	GO:0016021;GO:0005886;GO:0004957;GO:0004960	integral component of membrane;plasma membrane;prostaglandin E receptor activity;thromboxane receptor activity	K04258	PTGER1	http://www.genome.jp/dbget-bin/www_bget?ko:K04258	Calcium signaling pathway;Neuroactive ligand-receptor interaction;Pathways in cancer;Human cytomegalovirus infection	ko04020,ko04080,ko05200,ko05163	-	-	sp|Q9BGL8|PE2R1_CANLF	Prostaglandin E2 receptor EP1 subtype OS=Canis lupus familiaris OX=9615 GN=PTGER1 PE=3 SV=1
gene18329	1010	1.94	0.37	1.5	1.12	3.48	16.72	2.59067	0.00206807	0.0118124	kcne4	XP_010748309.2	potassium voltage-gated channel subfamily E member 4 [Larimichthys crocea]	GO:0016021;GO:0005249	integral component of membrane;voltage-gated potassium channel activity	K04898	KCNE4	http://www.genome.jp/dbget-bin/www_bget?ko:K04898	-	-	-	-	sp|Q9WTW3|KCNE4_MOUSE	Potassium voltage-gated channel subfamily E member 4 OS=Mus musculus OX=10090 GN=Kcne4 PE=2 SV=1
gene10876	1587	8.54	12.94	8.94	70.23	23.47	39.84	2.58989	7.5134e-08	1.90534e-06	wdr12	XP_027147151.1	ribosome biogenesis protein WDR12 [Larimichthys crocea]	GO:0000466;GO:0005730;GO:0000463;GO:0030687;GO:0005654;GO:0043021	maturation of 5.8S rRNA from tricistronic rRNA transcript (SSU-rRNA, 5.8S rRNA, LSU-rRNA);nucleolus;maturation of LSU-rRNA from tricistronic rRNA transcript (SSU-rRNA, 5.8S rRNA, LSU-rRNA);preribosome, large subunit precursor;nucleoplasm;ribonucleoprotein complex binding	K14863	WDR12,YTM1	http://www.genome.jp/dbget-bin/www_bget?ko:K14863	-	-	KOG0313	Microtubule binding protein YTM1 (contains WD40 repeats)	sp|Q6NX08|WDR12_DANRE	Ribosome biogenesis protein wdr12 OS=Danio rerio OX=7955 GN=wdr12 PE=2 SV=1
gene6620	1911	6.74	7.13	4.98	34.57	15.64	36.79	2.58949	8.7551e-13	6.90816e-11	babam1	XP_010732760.2	BRISC and BRCA1-A complex member 1 [Larimichthys crocea]	GO:0045739;GO:0070531;GO:0070552	positive regulation of DNA repair;BRCA1-A complex;BRISC complex	K20776	BABAM,NBA1,MERIT40	http://www.genome.jp/dbget-bin/www_bget?ko:K20776	Homologous recombination	ko03440	-	-	sp|Q6AXK4|BABA1_DANRE	BRISC and BRCA1-A complex member 1 OS=Danio rerio OX=7955 GN=babam1 PE=2 SV=2
gene4	1722	12.37	10.25	9.86	58.64	31.16	57.74	2.58886	9.40704e-14	9.0411e-12	ubl7	KAE8297316.1;XP_019134440.1	Ubiquitin-like protein 7 Bone marrow stromal cell ubiquitin-like protein [Larimichthys crocea];ubiquitin-like protein 7 isoform X1 [Larimichthys crocea]	-	-	-	-	-	-	-	-	-	sp|Q96S82|UBL7_HUMAN;sp|Q2KIS3|UBL7_BOVIN	Ubiquitin-like protein 7 OS=Homo sapiens OX=9606 GN=UBL7 PE=1 SV=2;Ubiquitin-like protein 7 OS=Bos taurus OX=9913 GN=UBL7 PE=2 SV=1
gene18430	465	10	19.06	29.25	92.64	84.49	68.75	2.58099	4.53777e-06	6.74028e-05	LOC104934471	XP_014057416.1	PREDICTED: 26S proteasome non-ATPase regulatory subunit 4, partial [Salmo salar]	GO:0000502	proteasome complex	K03029	PSMD4,RPN10	http://www.genome.jp/dbget-bin/www_bget?ko:K03029	Proteasome;Epstein-Barr virus infection;Alzheimer disease;Amyotrophic lateral sclerosis;Huntington disease;Parkinson disease;Pathways of neurodegeneration - multiple diseases;Prion disease;Spinocerebellar ataxia	ko03050,ko05169,ko05010,ko05014,ko05016,ko05012,ko05022,ko05020,ko05017	KOG2884	26S proteasome regulatory complex, subunit RPN10/PSMD4	sp|O35226|PSMD4_MOUSE	26S proteasome non-ATPase regulatory subunit 4 OS=Mus musculus OX=10090 GN=Psmd4 PE=1 SV=1
gene21136	943	6.19	12.92	6.23	21.39	26.46	74.86	2.58033	1.7432e-08	5.1662e-07	LOC104937331	XP_027129259.1	transmembrane 4 L6 family member 1-like [Larimichthys crocea]	GO:0016021	integral component of membrane	K24919	TM4SF4	http://www.genome.jp/dbget-bin/www_bget?ko:K24919	-	-	-	-	sp|P30408|T4S1_HUMAN	Transmembrane 4 L6 family member 1 OS=Homo sapiens OX=9606 GN=TM4SF1 PE=1 SV=1
gene16713	5390	1.52	1.1	2.42	10.27	5.35	7.34	2.57981	7.55339e-08	1.91353e-06	LOC104932650	XP_019121929.1;XP_010746232.2;XP_019121930.1;KAE8289689.1;XP_019121931.1	apoptosis-stimulating of p53 protein 1 isoform X2 [Larimichthys crocea];apoptosis-stimulating of p53 protein 1 isoform X1 [Larimichthys crocea];apoptosis-stimulating of p53 protein 1 isoform X3 [Larimichthys crocea];Apoptosis-stimulating of p53 protein 1 Protein phosphatase 1 regulatory subunit 13B [Larimichthys crocea];apoptosis-stimulating of p53 protein 1 isoform X4 [Larimichthys crocea]	-	-	K17554	PPP1R13B,ASPP1	http://www.genome.jp/dbget-bin/www_bget?ko:K17554	-	-	KOG0515	p53-interacting protein 53BP/ASPP, contains ankyrin and SH3 domains	sp|Q62415|ASPP1_MOUSE;sp|Q96KQ4|ASPP1_HUMAN	Apoptosis-stimulating of p53 protein 1 OS=Mus musculus OX=10090 GN=Ppp1r13b PE=1 SV=2;Apoptosis-stimulating of p53 protein 1 OS=Homo sapiens OX=9606 GN=PPP1R13B PE=1 SV=3
gene8829	2444	0.11	0.25	0.25	1.17	0.82	0.52	2.57716	0.000740998	0.00503305	LOC104924245	XP_019123967.1	cationic amino acid transporter 2 [Larimichthys crocea]	GO:0005886;GO:0016021;GO:0022857;GO:0006865	plasma membrane;integral component of membrane;transmembrane transporter activity;amino acid transport	K13864	SLC7A2,ATRC2	http://www.genome.jp/dbget-bin/www_bget?ko:K13864	-	-	KOG1286	Amino acid transporters	sp|Q5PR34|CTR2_DANRE	Cationic amino acid transporter 2 OS=Danio rerio OX=7955 GN=slc7a2 PE=2 SV=1
novel.7784	241	6.27	11.03	68.91	85.89	155.69	118.7	2.57606	0.00884798	0.0381979	-	XP_030018834.1	mitochondrial pyruvate carrier 1 isoform X2 [Sphaeramia orbicularis]	GO:0005743;GO:0016021;GO:0006850	mitochondrial inner membrane;integral component of membrane;mitochondrial pyruvate transmembrane transport	K22138	MPC1	http://www.genome.jp/dbget-bin/www_bget?ko:K22138	Diabetic cardiomyopathy	ko05415	-	-	-	-
gene15217	4247	2.17	4.12	4.94	22.5	11.32	15.99	2.57437	5.28603e-08	1.38455e-06	ubr3	XP_027146707.1;XP_027146709.1;XP_027146708.1	E3 ubiquitin-protein ligase UBR3 isoform X1 [Larimichthys crocea];E3 ubiquitin-protein ligase UBR3 isoform X3 [Larimichthys crocea];E3 ubiquitin-protein ligase UBR3 isoform X2 [Larimichthys crocea]	-	-	K11978	UBR3	http://www.genome.jp/dbget-bin/www_bget?ko:K11978	-	-	KOG1140;KOG1139	N-end rule pathway, recognition component UBR1;Predicted ubiquitin-protein ligase of the N-recognin family	sp|F1QJX5|UBR3_DANRE	E3 ubiquitin-protein ligase ubr3 OS=Danio rerio OX=7955 GN=ubr3 PE=2 SV=2
gene12224	519	10.95	12.25	16.19	63.42	66.78	19.25	2.56526	9.55987e-05	0.000904719	LOC104927870	XP_008294470.1	PREDICTED: golgin subfamily A member 7B-like [Stegastes partitus]	GO:0016020	membrane	-	-	-	-	-	-	-	sp|Q2TAP0|GOG7B_HUMAN	Golgin subfamily A member 7B OS=Homo sapiens OX=9606 GN=GOLGA7B PE=1 SV=2
gene5366	2327	0.06	0.13	0.13	0.25	0.38	0.93	2.56293	0.00311975	0.0165018	lrrc56	TMS05153.1	Leucine-rich repeat-containing protein 56 [Larimichthys crocea]	-	-	K25425	LRRC56	http://www.genome.jp/dbget-bin/www_bget?ko:K25425	-	-	-	-	sp|Q8IYG6|LRC56_HUMAN	Leucine-rich repeat-containing protein 56 OS=Homo sapiens OX=9606 GN=LRRC56 PE=1 SV=1
gene8026	2971	2.04	3.17	1.23	5.3	4.72	23.27	2.56243	6.55599e-07	1.268e-05	odc1	KAE8289603.1	Ornithine decarboxylase [Larimichthys crocea]	GO:0006596;GO:0042462;GO:0003824	polyamine biosynthetic process;eye photoreceptor cell development;catalytic activity	K01581	E4.1.1.17,ODC1,speC,speF	http://www.genome.jp/dbget-bin/www_bget?ko:K01581	Arginine and proline metabolism;Glutathione metabolism	ko00330,ko00480	KOG0622	Ornithine decarboxylase	sp|P27117|DCOR_BOVIN	Ornithine decarboxylase OS=Bos taurus OX=9913 GN=ODC1 PE=2 SV=1
gene7165	2489	2.6	6.36	3.71	19.62	12.29	25.52	2.56216	6.70488e-10	2.8543e-08	acsl4	XP_027137407.1	long-chain-fatty-acid--CoA ligase 4 [Larimichthys crocea]	GO:0030513;GO:0016021;GO:0009953;GO:0016874;GO:1900744;GO:0051896	positive regulation of BMP signaling pathway;integral component of membrane;dorsal/ventral pattern formation;ligase activity;regulation of p38MAPK cascade;regulation of protein kinase B signaling	K01897	ACSL,fadD	http://www.genome.jp/dbget-bin/www_bget?ko:K01897	Ferroptosis;Peroxisome;Fatty acid biosynthesis;Fatty acid degradation;Adipocytokine signaling pathway;PPAR signaling pathway;Thermogenesis	ko04216,ko04146,ko00061,ko00071,ko04920,ko03320,ko04714	KOG1180	Acyl-CoA synthetase	sp|O60488|ACSL4_HUMAN	Long-chain-fatty-acid--CoA ligase 4 OS=Homo sapiens OX=9606 GN=ACSL4 PE=1 SV=2
gene17262	971	9.29	6.4	9.79	29.81	26.13	66.29	2.56195	1.53343e-11	9.404e-10	LOC104933212	XP_010746906.1	F-box only protein 2 [Larimichthys crocea]	-	-	K10099	FBXO2,NFB42	http://www.genome.jp/dbget-bin/www_bget?ko:K10099	Protein processing in endoplasmic reticulum;Ubiquitin mediated proteolysis	ko04141,ko04120	-	-	sp|Q17QK6|FBX2_BOVIN	F-box only protein 2 OS=Bos taurus OX=9913 GN=FBXO2 PE=2 SV=1
gene3483	822	12.79	12.15	7.79	46.95	32.56	68.01	2.5598	8.1076e-15	9.99373e-13	LOC104918420	XP_010728470.1	required for excision 1-B domain-containing protein [Larimichthys crocea]	-	-	-	-	-	-	-	-	-	sp|Q17Q97|REX1B_BOVIN	Required for excision 1-B domain-containing protein OS=Bos taurus OX=9913 GN=REX1BD PE=2 SV=1
novel.16436	419	1.65	2.21	0.47	6.78	6.46	3.35	2.55718	0.00781891	0.0346152	Mphosph6	XP_030281033.1	M-phase phosphoprotein 6 [Sparus aurata]	-	-	K12593	MPHOSPH6,MPP6	http://www.genome.jp/dbget-bin/www_bget?ko:K12593	RNA degradation	ko03018	-	-	sp|Q9D1Q1|MPH6_MOUSE	M-phase phosphoprotein 6 OS=Mus musculus OX=10090 GN=Mphosph6 PE=1 SV=1
gene3968	1256	8.73	3.78	6.85	11.65	31.88	42.24	2.54958	6.62232e-06	9.34366e-05	neurl2	XP_010729128.1;XP_019108427.1	neuralized-like protein 2 isoform X1 [Larimichthys crocea];neuralized-like protein 2 isoform X2 [Larimichthys crocea]	GO:0035556;GO:0005737;GO:0016567	intracellular signal transduction;cytoplasm;protein ubiquitination	K16782	NEURL2	http://www.genome.jp/dbget-bin/www_bget?ko:K16782	-	-	KOG4625	Notch signaling protein Neuralized, Nuez domain	sp|Q9D0S4|NEUL2_MOUSE;sp|Q9BR09|NEUL2_HUMAN	Neuralized-like protein 2 OS=Mus musculus OX=10090 GN=Neurl2 PE=1 SV=1;Neuralized-like protein 2 OS=Homo sapiens OX=9606 GN=NEURL2 PE=2 SV=1
gene9100	2198	2.62	2.6	4.84	12.44	16.92	11.86	2.54406	1.7726e-06	3.02049e-05	psmd5	KAE8285285.1	26S proteasome non-ATPase regulatory subunit 5 [Larimichthys crocea]	GO:0043248;GO:0000502	proteasome assembly;proteasome complex	K06692	PSMD5	http://www.genome.jp/dbget-bin/www_bget?ko:K06692	-	-	-	-	sp|Q5IFJ8|PSMD5_MACFA	26S proteasome non-ATPase regulatory subunit 5 OS=Macaca fascicularis OX=9541 GN=PSMD5 PE=2 SV=3
gene11635	4974	1.22	0.62	1.37	1.81	3.57	10.62	2.54368	6.7104e-06	9.46255e-05	LOC104927219	TMS07677.1	Numb-like protein [Larimichthys crocea]	GO:0050769	positive regulation of neurogenesis	K06057	NUMBL	http://www.genome.jp/dbget-bin/www_bget?ko:K06057	Notch signaling pathway	ko04330	KOG3537	Adaptor protein NUMB	sp|Q9Y6R0|NUMBL_HUMAN	Numb-like protein OS=Homo sapiens OX=9606 GN=NUMBL PE=1 SV=1
gene13098	1232	120.23	43.87	191.83	366.72	133.5	1546.95	2.543	0.000232141	0.00189507	hspb1	NP_001290240.1	heat shock protein beta-1 [Larimichthys crocea]	GO:0005819	spindle	K04455	HSPB1	http://www.genome.jp/dbget-bin/www_bget?ko:K04455	MAPK signaling pathway;VEGF signaling pathway;Amoebiasis	ko04010,ko04370,ko05146	-	-	sp|O13224|HSPB1_POELU	Heat shock protein beta-1 OS=Poeciliopsis lucida OX=56613 GN=hspb1 PE=2 SV=1
gene17814	1938	1.03	0.58	0.33	0.93	2.08	6.62	2.5429	0.000131921	0.0011838	LOC104933799	XP_019130328.1	TNFAIP3-interacting protein 1-like [Larimichthys crocea]	GO:0043124;GO:0071222	negative regulation of I-kappaB kinase/NF-kappaB signaling;cellular response to lipopolysaccharide	K23836	TNIP3,ABIN3	http://www.genome.jp/dbget-bin/www_bget?ko:K23836	-	-	-	-	sp|Q9WUU8|TNIP1_MOUSE	TNFAIP3-interacting protein 1 OS=Mus musculus OX=10090 GN=Tnip1 PE=1 SV=1
gene238	1245	1.04	1.33	0.28	2.27	0.65	11.66	2.54172	0.00199587	0.0114892	arf4	XP_019121726.1;XP_037018132.1	ADP-ribosylation factor 4 [Larimichthys crocea];LOW QUALITY PROTEIN: ADP-ribosylation factor 2-like [Artibeus jamaicensis]	GO:0005886;GO:0006886;GO:0016192;GO:0005525	plasma membrane;intracellular protein transport;vesicle-mediated transport;GTP binding	K07939;K07937	ARF4;ARF1_2	http://www.genome.jp/dbget-bin/www_bget?ko:K07939;http://www.genome.jp/dbget-bin/www_bget?ko:K07937	Endocytosis;Phospholipase D signaling pathway;Legionellosis;Pathogenic Escherichia coli infection;Salmonella infection;Shigellosis;Vibrio cholerae infection	ko04144,ko04072,ko05134,ko05130,ko05132,ko05131,ko05110	KOG0070	GTP-binding ADP-ribosylation factor Arf1	sp|P51824|ARF1_SOLTU;sp|Q06396|ARF1_ORYSJ	ADP-ribosylation factor 1 OS=Solanum tuberosum OX=4113 PE=2 SV=2;ADP-ribosylation factor 1 OS=Oryza sativa subsp. japonica OX=39947 GN=Os01g0813400 PE=2 SV=3
gene22696	2656	0.72	1.17	2.2	6.97	5.34	5.03	2.53971	8.39109e-06	0.000114481	znf365	TMS04401.1	Protein ZNF365 [Larimichthys crocea]	-	-	K16737	ZNF365,Su48	http://www.genome.jp/dbget-bin/www_bget?ko:K16737	-	-	-	-	sp|Q5R9L2|ZN365_PONAB	Protein ZNF365 OS=Pongo abelii OX=9601 GN=ZNF365 PE=2 SV=1
gene8937	1349	4.14	3.95	2.63	7	8.62	39.47	2.53755	1.0701e-06	1.94376e-05	LOC104924323	KAE8281482.1	hypothetical protein D5F01_LYC20469 [Larimichthys crocea]	GO:0030368;GO:0016021	interleukin-17 receptor activity;integral component of membrane	-	-	-	-	-	-	-	-	-
gene10548	2203	0.87	0.72	1.09	3.67	3.39	4.67	2.53665	3.8034e-08	1.02987e-06	LOC104926072	XP_027141724.1	uncharacterized protein C17orf53 homolog isoform X2 [Larimichthys crocea]	GO:0000725	recombinational repair	-	-	-	-	-	-	-	sp|Q8N3J3|HROB_HUMAN	Homologous recombination OB-fold protein OS=Homo sapiens OX=9606 GN=HROB PE=1 SV=1
gene10371	2591	0.56	0.91	0.78	2.4	1.49	6.81	2.53543	4.44184e-07	9.09513e-06	LOC104925863	XP_019132915.2	transcriptional protein SWT1 [Larimichthys crocea]	-	-	-	-	-	-	-	-	-	sp|Q9DBQ9|SWT1_MOUSE	Transcriptional protein SWT1 OS=Mus musculus OX=10090 GN=Swt1 PE=2 SV=3
gene12033	3013	0.06	0.1	0.1	0.34	0.11	0.9	2.53509	0.00386669	0.0196838	LOC104927641	XP_019128536.2	protein bicaudal D homolog 1 isoform X3 [Larimichthys crocea]	GO:0070840;GO:0008093	dynein complex binding;cytoskeletal anchor activity	K18739	BICD	http://www.genome.jp/dbget-bin/www_bget?ko:K18739	-	-	KOG0999	Microtubule-associated protein Bicaudal-D	sp|Q96G01|BICD1_HUMAN	Protein bicaudal D homolog 1 OS=Homo sapiens OX=9606 GN=BICD1 PE=1 SV=3
gene13358	1509	1.39	2.66	1.34	3.51	7.76	12.67	2.53319	1.53679e-06	2.67008e-05	LOC104929051	XP_010741773.1	insulin-like growth factor-binding protein 3 [Larimichthys crocea]	GO:0005576;GO:0005520	extracellular region;insulin-like growth factor binding	K23579	IGFBP6	http://www.genome.jp/dbget-bin/www_bget?ko:K23579	-	-	-	-	sp|Q05718|IBP6_BOVIN	Insulin-like growth factor-binding protein 6 OS=Bos taurus OX=9913 GN=IGFBP6 PE=2 SV=2
gene23482	927	62.3	67.22	60.66	275.34	223.38	312.18	2.53313	2.66872e-15	3.69386e-13	psma5	XP_008304449.1	PREDICTED: proteasome subunit alpha type-5 [Stegastes partitus]	GO:0043161;GO:0005737;GO:0005634;GO:0019773	proteasome-mediated ubiquitin-dependent protein catabolic process;cytoplasm;nucleus;proteasome core complex, alpha-subunit complex	K02729	PSMA5	http://www.genome.jp/dbget-bin/www_bget?ko:K02729	Proteasome;Alzheimer disease;Amyotrophic lateral sclerosis;Huntington disease;Parkinson disease;Pathways of neurodegeneration - multiple diseases;Prion disease;Spinocerebellar ataxia	ko03050,ko05010,ko05014,ko05016,ko05012,ko05022,ko05020,ko05017	KOG0176	20S proteasome, regulatory subunit alpha type PSMA5/PUP2	sp|Q5E987|PSA5_BOVIN	Proteasome subunit alpha type-5 OS=Bos taurus OX=9913 GN=PSMA5 PE=1 SV=1
gene3794	2170	3.94	1.36	3.57	5.4	4.36	40.69	2.53274	0.000194847	0.00163589	fstl3	XP_010728901.1	follistatin-related protein 3 [Larimichthys crocea]	-	-	K23913	FSTL3	http://www.genome.jp/dbget-bin/www_bget?ko:K23913	-	-	KOG3649	FOG: Kazal-type serine protease inhibitor domain	sp|O95633|FSTL3_HUMAN	Follistatin-related protein 3 OS=Homo sapiens OX=9606 GN=FSTL3 PE=1 SV=1
gene15188	1130	0.76	0.82	1.69	4.74	3.3	6.77	2.53259	3.66964e-06	5.65768e-05	nudt6	XP_010744220.3	nucleoside diphosphate-linked moiety X motif 6 isoform X2 [Larimichthys crocea]	GO:0016787	hydrolase activity	-	-	-	-	-	-	-	sp|P53370|NUDT6_HUMAN	Nucleoside diphosphate-linked moiety X motif 6 OS=Homo sapiens OX=9606 GN=NUDT6 PE=1 SV=2
novel.16596	1208	16.9	6.21	16.25	43.74	82.06	15.95	2.53031	0.000542369	0.00387255	-	TKS82483.1	hypothetical protein D9C73_016592 [Collichthys lucidus]	-	-	-	-	-	-	-	-	-	-	-
novel.21633	885	1.46	4.48	1.58	12.16	9.51	8.1	2.52996	2.6136e-05	0.00030203	-	-	-	-	-	-	-	-	-	-	-	-	-	-
gene22299	2484	58.13	77.95	76.45	382.15	239.86	257.66	2.52902	2.4971e-09	9.13857e-08	LOC104938560	TKS75698.1	Serine incorporator 1 [Collichthys lucidus]	GO:0006658;GO:0006665;GO:0016021	phosphatidylserine metabolic process;sphingolipid metabolic process;integral component of membrane	K23544	SERINC1_3	http://www.genome.jp/dbget-bin/www_bget?ko:K23544	-	-	KOG2592	Tumor differentially expressed (TDE) protein	sp|Q5R419|SERC1_PONAB	Serine incorporator 1 OS=Pongo abelii OX=9601 GN=SERINC1 PE=2 SV=1
gene8236	4304	1.67	0.95	3.75	10.25	5.51	11.41	2.52753	3.28479e-06	5.15415e-05	LOC104923551	XP_027136257.1	zinc finger and BTB domain-containing protein 16-A, partial [Larimichthys crocea]	-	-	K10055	ZBTB16,PLZF	http://www.genome.jp/dbget-bin/www_bget?ko:K10055	Pathways in cancer;Transcriptional misregulation in cancer;Acute myeloid leukemia	ko05200,ko05202,ko05221	-	-	sp|Q802Y8|ZB16A_DANRE	Zinc finger and BTB domain-containing protein 16-A OS=Danio rerio OX=7955 GN=zbtb16a PE=1 SV=1
gene3962	1765	5.89	5.81	3.43	18.55	16.47	31.38	2.5235	2.64498e-14	2.7886e-12	pgp	XP_019108424.2	glycerol-3-phosphate phosphatase [Larimichthys crocea]	GO:0016791	phosphatase activity	K19269	PGP,PGLP	http://www.genome.jp/dbget-bin/www_bget?ko:K19269	Glyoxylate and dicarboxylate metabolism	ko00630	KOG2882	p-Nitrophenyl phosphatase	sp|A6NDG6|PGP_HUMAN	Glycerol-3-phosphate phosphatase OS=Homo sapiens OX=9606 GN=PGP PE=1 SV=1
gene9715	4452	0.52	0.4	0.56	0.67	1.49	5.45	2.52226	3.20414e-05	0.000359932	myo1d	XP_027145123.1	unconventional myosin-Id isoform X1 [Larimichthys crocea]	GO:0035469;GO:0005524;GO:0003774;GO:0003779;GO:0016459;GO:0005576;GO:0060287;GO:0071910;GO:0003146;GO:0061966	determination of pancreatic left/right asymmetry;ATP binding;cytoskeletal motor activity;actin binding;myosin complex;extracellular region;epithelial cilium movement involved in determination of left/right asymmetry;determination of liver left/right asymmetry;heart jogging;establishment of left/right asymmetry	K10356	MYO1	http://www.genome.jp/dbget-bin/www_bget?ko:K10356	Pathogenic Escherichia coli infection	ko05130	KOG0164	Myosin class I heavy chain	sp|E7F9L8|MYO1D_DANRE	Unconventional myosin-Id OS=Danio rerio OX=7955 GN=myo1d PE=2 SV=1
gene15136	1895	3.18	3.81	4.05	15.45	10.24	24.8	2.52167	1.20565e-13	1.13148e-11	hyal2	XP_010744151.2	hyaluronidase-2 [Larimichthys crocea]	GO:0005975;GO:0004415	carbohydrate metabolic process;hyalurononglucosaminidase activity	K01197	hya	http://www.genome.jp/dbget-bin/www_bget?ko:K01197	Lysosome;Glycosaminoglycan degradation	ko04142,ko00531	-	-	sp|Q12891|HYAL2_HUMAN	Hyaluronidase-2 OS=Homo sapiens OX=9606 GN=HYAL2 PE=1 SV=4
gene18206	2383	2.31	0.59	2.4	8.13	8.16	6.61	2.5204	3.63065e-05	0.000399479	LOC104934223	XP_019121268.1;XP_019121267.1	transcription cofactor vestigial-like protein 2 isoform X2 [Larimichthys crocea];transcription cofactor vestigial-like protein 2 isoform X1 [Larimichthys crocea]	GO:0005634;GO:0006355	nucleus;regulation of transcription, DNA-templated	-	-	-	-	-	-	-	sp|Q8BGW8|VGLL2_MOUSE	Transcription cofactor vestigial-like protein 2 OS=Mus musculus OX=10090 GN=Vgll2 PE=1 SV=1
gene23194	2535	4.85	4.16	10.93	25.75	24.93	36.07	2.51923	7.42909e-07	1.41805e-05	LOC104939517	XP_019134218.1;XP_019134221.1;XP_019134219.1;TMS08563.1;XP_034565049.1	RILP-like protein 1 isoform X1 [Larimichthys crocea];RILP-like protein 1 isoform X4 [Larimichthys crocea];RILP-like protein 1 isoform X2 [Larimichthys crocea];RILP-like protein 1 [Larimichthys crocea];RILP-like protein 1 isoform X2 [Notolabrus celidotus]	GO:0015031;GO:0046983;GO:0016021	protein transport;protein dimerization activity;integral component of membrane	K20173	RILPL1	http://www.genome.jp/dbget-bin/www_bget?ko:K20173	-	-	-	-	sp|A0PJT0|RIPL1_DANRE	RILP-like protein 1 OS=Danio rerio OX=7955 GN=rilpl1 PE=2 SV=2
gene767	2272	0.06	0.08	0.14	0.34	0.24	0.73	2.51642	0.0056007	0.0264512	ccdc175	XP_010734190.3	coiled-coil domain-containing protein 175 [Larimichthys crocea]	-	-	-	-	-	-	-	-	-	sp|E9PVB3|CC175_MOUSE	Coiled-coil domain-containing protein 175 OS=Mus musculus OX=10090 GN=Ccdc175 PE=4 SV=1
novel.11996	1299	1.62	3.15	1.82	14.97	2.09	12.8	2.51147	6.67142e-05	0.000669447	-	-	-	-	-	-	-	-	-	-	-	-	-	-
gene6642	1970	4.48	8.34	4.72	4.11	18.4	65.89	2.51089	0.000197954	0.00165693	ptgs2	AKO69816.1	cyclooxygenase-2 [Larimichthys crocea]	GO:0020037;GO:0004601;GO:0005789;GO:0006954;GO:0006979;GO:0019371;GO:0004666;GO:0051213;GO:0008217;GO:0046872	heme binding;peroxidase activity;endoplasmic reticulum membrane;inflammatory response;response to oxidative stress;cyclooxygenase pathway;prostaglandin-endoperoxide synthase activity;dioxygenase activity;regulation of blood pressure;metal ion binding	K11987	PTGS2,COX2	http://www.genome.jp/dbget-bin/www_bget?ko:K11987	NF-kappa B signaling pathway;TNF signaling pathway;VEGF signaling pathway;Chemical carcinogenesis - DNA adducts;MicroRNAs in cancer;Pathways in cancer;Small cell lung cancer;Leishmaniasis;Human cytomegalovirus infection;Human papillomavirus infection;Kaposi sarcoma-associated herpesvirus infection;Alzheimer disease;Pathways of neurodegeneration - multiple diseases;Arachidonic acid metabolism;Ovar…	ko04064,ko04668,ko04370,ko05204,ko05206,ko05200,ko05222,ko05140,ko05163,ko05165,ko05167,ko05010,ko05022,ko00590,ko04913,ko04921,ko04923,ko04625,ko04657,ko04723,ko04726	KOG2408	Peroxidase/oxygenase	sp|P70682|PGH2_CAVPO	Prostaglandin G/H synthase 2 OS=Cavia porcellus OX=10141 GN=PTGS2 PE=2 SV=1
gene12770	1814	3.23	2.13	3.14	15.48	6.7	15.25	2.50753	5.30827e-09	1.80905e-07	znhit2	XP_010741015.3	zinc finger HIT domain-containing protein 2 [Larimichthys crocea]	GO:0046872	metal ion binding	-	-	-	-	-	KOG4317	Predicted Zn-finger protein	sp|Q9QY66|ZNHI2_MOUSE	Zinc finger HIT domain-containing protein 2 OS=Mus musculus OX=10090 GN=Znhit2 PE=2 SV=2
gene15861	1103	0.57	1.3	4.52	8.34	6.97	6.58	2.50623	0.000507899	0.00366658	LOC104931738	KAE8286713.1;TMS11985.1	Formin Limb deformity protein [Larimichthys crocea];Formin [Larimichthys crocea]	GO:0005884;GO:0008017;GO:0045010	actin filament;microtubule binding;actin nucleation	K10367	FMN1	http://www.genome.jp/dbget-bin/www_bget?ko:K10367	-	-	KOG1922	Rho GTPase effector BNI1 and related formins	sp|Q05858|FMN_CHICK;sp|Q05860|FMN1_MOUSE	Formin OS=Gallus gallus OX=9031 GN=LD PE=2 SV=1;Formin-1 OS=Mus musculus OX=10090 GN=Fmn1 PE=1 SV=2
gene6268	1563	53.1	24.65	47.02	219.42	105.69	222.28	2.50241	1.12094e-08	3.52441e-07	LOC104921431	XP_010732257.1	tumor protein p53-inducible nuclear protein 2 [Larimichthys crocea]	GO:0005829;GO:0005776;GO:0016605	cytosol;autophagosome;PML body	K21247	TP53INP2	http://www.genome.jp/dbget-bin/www_bget?ko:K21247	Autophagy - animal	ko04140	-	-	sp|Q8CFU8|T53I2_MOUSE	Tumor protein p53-inducible nuclear protein 2 OS=Mus musculus OX=10090 GN=Tp53inp2 PE=2 SV=4
gene21007	3045	6.37	11.33	18.47	29.38	72.77	36.59	2.50224	7.08564e-05	0.000704187	klhl21	XP_010751685.2	kelch-like protein 21 [Larimichthys crocea]	GO:0007049;GO:0005819;GO:0051301;GO:0016567	cell cycle;spindle;cell division;protein ubiquitination	K10458	KLHL21	http://www.genome.jp/dbget-bin/www_bget?ko:K10458	-	-	-	-	sp|Q6NYM1|KLH21_DANRE	Kelch-like protein 21 OS=Danio rerio OX=7955 GN=klhl21 PE=2 SV=1
gene22399	357	13.99	22.97	12.54	69.31	59.73	62.74	2.4989	4.59329e-07	9.34347e-06	ube2g2	XP_036966456.1	ubiquitin-conjugating enzyme E2 G2 isoform X2 [Acanthopagrus latus]	GO:0005524;GO:0016740	ATP binding;transferase activity	K04555	UBE2G2,UBC7	http://www.genome.jp/dbget-bin/www_bget?ko:K04555	Protein processing in endoplasmic reticulum;Ubiquitin mediated proteolysis;Parkinson disease;Pathways of neurodegeneration - multiple diseases	ko04141,ko04120,ko05012,ko05022	KOG0426	Ubiquitin-protein ligase	sp|Q17QG5|UB2G2_BOVIN	Ubiquitin-conjugating enzyme E2 G2 OS=Bos taurus OX=9913 GN=UBE2G2 PE=2 SV=1
gene12660	1265	12.36	5.25	5.19	20.95	29.13	46.72	2.49864	6.33589e-08	1.63179e-06	LOC104928310	-	-	-	-	-	-	-	-	-	-	-	-	-
gene3716	2012	13.95	18.87	8.98	74.47	28.08	79.49	2.49846	1.55404e-09	5.99734e-08	cdc37	XP_010728799.2	hsp90 co-chaperone Cdc37 [Larimichthys crocea]	GO:0005737;GO:0016301;GO:0019901	cytoplasm;kinase activity;protein kinase binding	K09554	CDC37	http://www.genome.jp/dbget-bin/www_bget?ko:K09554	PI3K-Akt signaling pathway	ko04151	KOG2260	Cell division cycle 37 protein, CDC37	sp|Q9DGQ7|CDC37_TETFL	Hsp90 co-chaperone Cdc37 OS=Tetraodon fluviatilis OX=47145 GN=cdc37 PE=3 SV=1
gene12098	2888	1.43	0.93	2.33	9.32	4.09	6.66	2.4963	2.84133e-06	4.56529e-05	musk	XP_027134354.1	muscle, skeletal receptor tyrosine-protein kinase [Larimichthys crocea]	GO:0005886;GO:0005524;GO:0016021;GO:0045202;GO:0004714	plasma membrane;ATP binding;integral component of membrane;synapse;transmembrane receptor protein tyrosine kinase activity	K05129	MUSK	http://www.genome.jp/dbget-bin/www_bget?ko:K05129	-	-	KOG1026	Nerve growth factor receptor TRKA and related tyrosine kinases	sp|Q8AXY6|MUSK_CHICK	Muscle, skeletal receptor tyrosine protein kinase OS=Gallus gallus OX=9031 GN=MUSK PE=2 SV=1
gene204	1653	8	4.13	4.91	12.42	18.79	47.7	2.49469	5.6438e-08	1.47036e-06	LOC104937906	XP_019123133.1	heme transporter hrg1-A-like [Larimichthys crocea]	GO:0048821;GO:0010008;GO:0016021;GO:0015232;GO:0005765	erythrocyte development;endosome membrane;integral component of membrane;heme transmembrane transporter activity;lysosomal membrane	K15380	SLC48A1,HRG1	http://www.genome.jp/dbget-bin/www_bget?ko:K15380	-	-	-	-	sp|Q7T3B2|HRG1A_DANRE	Heme transporter hrg1-A OS=Danio rerio OX=7955 GN=slc48a1b PE=2 SV=1
gene12498	1604	1.73	8.53	23.88	59.02	54.4	18.38	2.49263	0.00330131	0.0172779	fads6	TMS21963.1	Fatty acid desaturase 6 [Larimichthys crocea]	GO:0006629;GO:0016021	lipid metabolic process;integral component of membrane	K12419	FADS6	http://www.genome.jp/dbget-bin/www_bget?ko:K12419	-	-	-	-	sp|A2VE15|FADS6_BOVIN	Fatty acid desaturase 6 OS=Bos taurus OX=9913 GN=FADS6 PE=2 SV=1
gene8048	663	2.14	8.28	22.42	65.38	43.98	19.48	2.49201	0.00230074	0.0129142	ubald2	XP_010734723.3	UBA-like domain-containing protein 2 [Larimichthys crocea]	-	-	-	-	-	-	-	-	-	sp|Q8IYN6|UBAD2_HUMAN	UBA-like domain-containing protein 2 OS=Homo sapiens OX=9606 GN=UBALD2 PE=1 SV=1
gene17190	1262	45.1	29.92	46.44	186.93	24.9	417.64	2.49102	0.000101965	0.000952773	mustn1	XP_010746826.1	musculoskeletal embryonic nuclear protein 1 isoform X1 [Larimichthys crocea]	GO:0035988;GO:0005634;GO:0002062;GO:0042246	chondrocyte proliferation;nucleus;chondrocyte differentiation;tissue regeneration	-	-	-	-	-	-	-	sp|Q05AX4|MSTN1_XENLA	Musculoskeletal embryonic nuclear protein 1 OS=Xenopus laevis OX=8355 GN=mustn1 PE=3 SV=1
gene1016	3345	2.84	3.89	3.98	5.97	23.06	7.29	2.48927	0.00020886	0.0017394	LOC104925857	KAF1375945.1;XP_019115602.1	hypothetical protein PFLUV_G00225460 [Perca fluviatilis];phosphofurin acidic cluster sorting protein 2 isoform X1 [Larimichthys crocea]	-	-	K23294	PACS2	http://www.genome.jp/dbget-bin/www_bget?ko:K23294	-	-	-	-	sp|Q86VP3|PACS2_HUMAN;sp|Q6VY07|PACS1_HUMAN	Phosphofurin acidic cluster sorting protein 2 OS=Homo sapiens OX=9606 GN=PACS2 PE=1 SV=3;Phosphofurin acidic cluster sorting protein 1 OS=Homo sapiens OX=9606 GN=PACS1 PE=1 SV=2
gene5491	1823	8.65	7.84	7.76	43.52	24.2	30.47	2.48523	1.20782e-09	4.81884e-08	vamp7	KAE8286212.1	Vesicle-associated membrane protein 7 [Larimichthys crocea]	GO:0016021;GO:0016192	integral component of membrane;vesicle-mediated transport	K08515	VAMP7	http://www.genome.jp/dbget-bin/www_bget?ko:K08515	SNARE interactions in vesicular transport	ko04130	-	-	sp|P51809|VAMP7_HUMAN	Vesicle-associated membrane protein 7 OS=Homo sapiens OX=9606 GN=VAMP7 PE=1 SV=3
gene15373	1003	63.04	82.8	66.56	328.73	196.92	377.73	2.485	7.72486e-15	9.68008e-13	LOC104931205	XP_027140493.1	proteasome subunit alpha type-6 [Larimichthys crocea]	GO:0019773;GO:0005737;GO:0006511;GO:0005634	proteasome core complex, alpha-subunit complex;cytoplasm;ubiquitin-dependent protein catabolic process;nucleus	K02730	PSMA6	http://www.genome.jp/dbget-bin/www_bget?ko:K02730	Proteasome;Alzheimer disease;Amyotrophic lateral sclerosis;Huntington disease;Parkinson disease;Pathways of neurodegeneration - multiple diseases;Prion disease;Spinocerebellar ataxia	ko03050,ko05010,ko05014,ko05016,ko05012,ko05022,ko05020,ko05017	KOG0182	20S proteasome, regulatory subunit alpha type PSMA6/SCL1	sp|Q2YDE4|PSA6_BOVIN	Proteasome subunit alpha type-6 OS=Bos taurus OX=9913 GN=PSMA6 PE=1 SV=1
gene18425	2552	2.1	1.32	0.84	3.8	4.09	7.76	2.48	5.8142e-08	1.50999e-06	LOC104934469	KAE8288813.1	Interleukin-6 receptor subunit alpha [Larimichthys crocea]	GO:0016021;GO:0005886;GO:0004896	integral component of membrane;plasma membrane;cytokine receptor activity	K05055	IL6R,CD126	http://www.genome.jp/dbget-bin/www_bget?ko:K05055	HIF-1 signaling pathway;JAK-STAT signaling pathway;PI3K-Akt signaling pathway;Cytokine-cytokine receptor interaction;Viral protein interaction with cytokine and cytokine receptor;Pathways in cancer;EGFR tyrosine kinase inhibitor resistance;Non-alcoholic fatty liver disease;Coronavirus disease - COVID-19;Human cytomegalovirus infection;Hematopoietic cell lineage;Th17 cell differentiation	ko04066,ko04630,ko04151,ko04060,ko04061,ko05200,ko01521,ko04932,ko05171,ko05163,ko04640,ko04659	-	-	sp|O18796|IL6RA_PIG	Interleukin-6 receptor subunit alpha OS=Sus scrofa OX=9823 GN=IL6R PE=2 SV=2
novel.19673	594	1.26	0.81	0.75	1.7	2.27	7.8	2.47654	0.00337671	0.0176018	-	-	-	-	-	-	-	-	-	-	-	-	-	-
gene17770	3497	2.89	2.79	3.22	13.45	9.15	14.7	2.47317	1.66938e-12	1.23464e-10	ap4b1	KAE8293033.1	AP-4 complex subunit beta-1 [Larimichthys crocea]	GO:0005524;GO:0016192;GO:0006886;GO:0004756;GO:0030131	ATP binding;vesicle-mediated transport;intracellular protein transport;selenide, water dikinase activity;clathrin adaptor complex	K12401	AP4B1	http://www.genome.jp/dbget-bin/www_bget?ko:K12401	Lysosome	ko04142	KOG1061	Vesicle coat complex AP-1/AP-2/AP-4, beta subunit	sp|Q9Y6B7|AP4B1_HUMAN	AP-4 complex subunit beta-1 OS=Homo sapiens OX=9606 GN=AP4B1 PE=1 SV=2
gene9265	1955	7.42	9.8	10.03	21.78	37.33	55.23	2.46997	1.94528e-09	7.34699e-08	nt5dc2	TKS76719.1;XP_019129715.1	5&apos;-nucleotidase domain-containing protein 2 [Collichthys lucidus];5&apos;-nucleotidase domain-containing protein 2 [Larimichthys crocea]	GO:0046872;GO:0016787	metal ion binding;hydrolase activity	-	-	-	-	-	-	-	sp|Q9H857|NT5D2_HUMAN;sp|Q6Q0N3|NT5D2_RAT	5&apos;-nucleotidase domain-containing protein 2 OS=Homo sapiens OX=9606 GN=NT5DC2 PE=1 SV=1;5&apos;-nucleotidase domain-containing protein 2 OS=Rattus norvegicus OX=10116 GN=Nt5dc2 PE=2 SV=2
gene5533	2059	46.91	17.32	46.87	220.52	76.8	180.7	2.46398	3.05608e-06	4.86303e-05	hspb8	XP_010731271.1	heat shock protein beta-8 [Larimichthys crocea]	GO:0042803;GO:0034620	protein homodimerization activity;cellular response to unfolded protein	K08879	HSPB8	http://www.genome.jp/dbget-bin/www_bget?ko:K08879	-	-	-	-	sp|Q9UJY1|HSPB8_HUMAN	Heat shock protein beta-8 OS=Homo sapiens OX=9606 GN=HSPB8 PE=1 SV=1
gene2034	2092	2.97	3.58	3.5	15.51	8.76	18.59	2.46261	2.48993e-12	1.78296e-10	LOC104937167	TMS16851.1	Golgi reassembly-stacking protein 1 [Larimichthys crocea]	GO:0016020;GO:0005794	membrane;Golgi apparatus	-	-	-	-	-	KOG3834	Golgi reassembly stacking protein GRASP65, contains PDZ domain	sp|O35254|GORS1_RAT	Golgi reassembly-stacking protein 1 OS=Rattus norvegicus OX=10116 GN=Gorasp1 PE=1 SV=4
novel.4985	2111	0.52	0.41	0.49	0.53	1.68	4.36	2.46196	0.00027141	0.00215804	-	AMB20849.1	Adropin [Oreochromis niloticus]	GO:0004252;GO:0016021	serine-type endopeptidase activity;integral component of membrane	-	-	-	-	-	-	-	-	-
gene3509	5742	0.09	0.03	0.08	0.35	0.11	0.37	2.46189	0.00142515	0.00868294	erich3	XP_027145632.1	glutamate-rich protein 3 [Larimichthys crocea]	-	-	-	-	-	-	-	-	-	sp|Q5RHP9|ERIC3_HUMAN	Glutamate-rich protein 3 OS=Homo sapiens OX=9606 GN=ERICH3 PE=1 SV=1
gene15719	2802	18.89	24.86	31.72	92.89	96.32	120.3	2.46005	7.27924e-10	3.07241e-08	mtdh	XP_010744911.1;XP_010744912.1	protein LYRIC isoform X1 [Larimichthys crocea];protein LYRIC isoform X2 [Larimichthys crocea]	GO:0045766;GO:0043123;GO:0016021;GO:0043066	positive regulation of angiogenesis;positive regulation of I-kappaB kinase/NF-kappaB signaling;integral component of membrane;negative regulation of apoptotic process	-	-	-	-	-	-	-	sp|Q9Z1W6|LYRIC_RAT;sp|Q86UE4|LYRIC_HUMAN	Protein LYRIC OS=Rattus norvegicus OX=10116 GN=Mtdh PE=1 SV=2;Protein LYRIC OS=Homo sapiens OX=9606 GN=MTDH PE=1 SV=2
gene20187	1725	0.9	0.89	0.48	4.66	1.48	3.08	2.45951	2.12612e-05	0.000254846	cdc37l1	XP_010750694.3	hsp90 co-chaperone Cdc37-like 1 [Larimichthys crocea]	GO:0005737	cytoplasm	-	-	-	-	-	-	-	sp|A7YY97|CD37L_DANRE	Hsp90 co-chaperone Cdc37-like 1 OS=Danio rerio OX=7955 GN=cdc37l1 PE=2 SV=1
gene20700	1893	9.78	7	10.87	65.85	17.33	29.32	2.45098	7.53534e-06	0.000104944	lrrc58	XP_023271571.1;XP_019116717.1	leucine-rich repeat-containing protein 58 [Seriola lalandi dorsalis];leucine-rich repeat-containing protein 58 [Larimichthys crocea]	-	-	-	-	-	-	-	-	-	sp|Q32NT4|LRC58_XENLA	Leucine-rich repeat-containing protein 58 OS=Xenopus laevis OX=8355 GN=lrrc58 PE=2 SV=1
gene8433	1661	8	9.22	9.01	45.52	23.07	38.56	2.45066	1.79495e-10	8.61652e-09	dcaf13	XP_027143071.1	DDB1- and CUL4-associated factor 13 [Larimichthys crocea]	GO:0005730;GO:0016567	nucleolus;protein ubiquitination	K11806	DCAF13,WDSOF1	http://www.genome.jp/dbget-bin/www_bget?ko:K11806	-	-	KOG0268	Sof1-like rRNA processing protein (contains WD40 repeats)	sp|Q803X4|DCA13_DANRE	DDB1- and CUL4-associated factor 13 OS=Danio rerio OX=7955 GN=dcaf13 PE=2 SV=1
gene6298	1452	0.81	3.01	1.52	5.51	8	6.78	2.45017	3.10094e-05	0.00034954	irg1	KAE8299121.1	Cis-aconitate decarboxylase [Larimichthys crocea]	GO:0016829	lyase activity	K17724	IRG1	http://www.genome.jp/dbget-bin/www_bget?ko:K17724	C5-Branched dibasic acid metabolism	ko00660	-	-	sp|A6NK06|IRG1_HUMAN	Cis-aconitate decarboxylase OS=Homo sapiens OX=9606 GN=ACOD1 PE=1 SV=1
gene5298	861	82.27	108.53	83.4	389.38	282.36	438.41	2.44869	2.45157e-14	2.60687e-12	psmb3	XP_010730943.1	proteasome subunit beta type-3 [Larimichthys crocea]	GO:0043161;GO:0005737;GO:0004298;GO:0019774;GO:0005634	proteasome-mediated ubiquitin-dependent protein catabolic process;cytoplasm;threonine-type endopeptidase activity;proteasome core complex, beta-subunit complex;nucleus	K02735	PSMB3	http://www.genome.jp/dbget-bin/www_bget?ko:K02735	Proteasome;Alzheimer disease;Amyotrophic lateral sclerosis;Huntington disease;Parkinson disease;Pathways of neurodegeneration - multiple diseases;Prion disease;Spinocerebellar ataxia	ko03050,ko05010,ko05014,ko05016,ko05012,ko05022,ko05020,ko05017	KOG0180	20S proteasome, regulatory subunit beta type PSMB3/PUP3	sp|O73817|PSB3_ONCMY	Proteasome subunit beta type-3 OS=Oncorhynchus mykiss OX=8022 GN=psmb3 PE=2 SV=1
gene15493	1240	1.56	2.59	1.2	10.07	3.07	6.6	2.44748	3.52629e-05	0.000390207	sirt4	XP_027134801.1;XP_027134802.1	NAD-dependent protein lipoamidase sirtuin-4, mitochondrial isoform X1 [Larimichthys crocea];NAD-dependent protein lipoamidase sirtuin-4, mitochondrial isoform X2 [Larimichthys crocea]	GO:0070403;GO:0034979;GO:0006471;GO:0016740;GO:0005759;GO:0008270	NAD+ binding;NAD-dependent protein deacetylase activity;protein ADP-ribosylation;transferase activity;mitochondrial matrix;zinc ion binding	K11414	SIRT4,SIR2L4	http://www.genome.jp/dbget-bin/www_bget?ko:K11414	Nicotinate and nicotinamide metabolism	ko00760	KOG2683	Sirtuin 4 and related class II sirtuins (SIR2 family)	sp|Q8R216|SIR4_MOUSE	NAD-dependent protein lipoamidase sirtuin-4, mitochondrial OS=Mus musculus OX=10090 GN=Sirt4 PE=1 SV=3
gene9000	1401	0.74	0.14	0.19	1.1	0.89	2.72	2.44325	0.00188301	0.0109567	LOC104924385	XP_010736018.2;XP_010736016.2	myelin-associated glycoprotein isoform X2 [Larimichthys crocea];myelin-associated glycoprotein isoform X1 [Larimichthys crocea]	GO:0016021;GO:0005886	integral component of membrane;plasma membrane	K06771	MAG,GMA,SIGLEC4	http://www.genome.jp/dbget-bin/www_bget?ko:K06771	Cell adhesion molecules	ko04514	-	-	sp|P20916|MAG_HUMAN	Myelin-associated glycoprotein OS=Homo sapiens OX=9606 GN=MAG PE=1 SV=1
gene2700	8953	38.64	12.52	39.35	183.92	39.19	184.52	2.44186	4.0848e-05	0.00043964	LOC104940629	XP_019124722.1;XP_019124673.2	filamin-C isoform X2 [Larimichthys crocea];filamin-C isoform X1 [Larimichthys crocea]	GO:0003779;GO:0046716;GO:0007626	actin binding;muscle cell cellular homeostasis;locomotory behavior	K04437	FLNA	http://www.genome.jp/dbget-bin/www_bget?ko:K04437	Focal adhesion;MAPK signaling pathway;Proteoglycans in cancer;Salmonella infection	ko04510,ko04010,ko05205,ko05132	-	-	sp|D3ZHA0|FLNC_RAT	Filamin-C OS=Rattus norvegicus OX=10116 GN=Flnc PE=1 SV=1
gene16592	2868	21.58	13.07	8.8	38.02	58	76.2	2.4395	2.27846e-08	6.5641e-07	hspd1	TKS67869.1;XP_019125723.1;TMS06511.1	60 kDa heat shock protein, mitochondrial [Collichthys lucidus];60 kDa heat shock protein, mitochondrial [Larimichthys crocea];60 kDa heat shock protein, mitochondrial [Larimichthys crocea]	GO:0016887;GO:0016853;GO:0042026;GO:0005524	ATP hydrolysis activity;isomerase activity;protein refolding;ATP binding	K04077	groEL,HSPD1	http://www.genome.jp/dbget-bin/www_bget?ko:K04077	RNA degradation;Lipid and atherosclerosis;Type I diabetes mellitus;Legionellosis;Tuberculosis;Longevity regulating pathway - worm	ko03018,ko05417,ko04940,ko05134,ko05152,ko04212	KOG0356	Mitochondrial chaperonin, Cpn60/Hsp60p	sp|Q5ZL72|CH60_CHICK	60 kDa heat shock protein, mitochondrial OS=Gallus gallus OX=9031 GN=HSPD1 PE=1 SV=1
gene1714	3328	4.48	6.41	5.13	21.09	15.61	30.55	2.43874	8.54717e-15	1.03806e-12	atxn10	XP_019134486.2	ataxin-10 [Larimichthys crocea]	-	-	K19323	ATXN10	http://www.genome.jp/dbget-bin/www_bget?ko:K19323	Spinocerebellar ataxia	ko05017	-	-	sp|Q5FVB0|ATX10_XENTR	Ataxin-10 OS=Xenopus tropicalis OX=8364 GN=atxn10 PE=2 SV=1
gene85	6333	0.63	0.48	0.39	1.74	1.45	3.09	2.43764	1.57314e-11	9.60001e-10	LOC104923885	XP_019123562.1;XP_019123559.1;XP_027145544.1	neurexin-1a isoform X6 [Larimichthys crocea];neurexin-1a isoform X3 [Larimichthys crocea];neurexin-1a isoform X2 [Larimichthys crocea]	-	-	K07377	NRXN	http://www.genome.jp/dbget-bin/www_bget?ko:K07377	Cell adhesion molecules	ko04514	KOG3514	Neurexin III-alpha	sp|A1XQX0|NR1AA_DANRE	Neurexin-1a OS=Danio rerio OX=7955 GN=nrxn1a PE=2 SV=1
gene19217	1664	9.88	5.27	5.75	31.42	19.73	33.16	2.43387	7.82707e-10	3.28128e-08	polr3d	XP_019110942.1	DNA-directed RNA polymerase III subunit RPC4 [Larimichthys crocea]	GO:0006383;GO:0003899;GO:0003677;GO:0005666	transcription by RNA polymerase III;DNA-directed 5'-3' RNA polymerase activity;DNA binding;RNA polymerase III complex	K03026	RPC4,POLR3D	http://www.genome.jp/dbget-bin/www_bget?ko:K03026	RNA polymerase;Cytosolic DNA-sensing pathway	ko03020,ko04623	KOG3122	DNA-directed RNA polymerase III subunit	sp|Q5E9Z7|RPC4_BOVIN	DNA-directed RNA polymerase III subunit RPC4 OS=Bos taurus OX=9913 GN=POLR3D PE=2 SV=1
gene3225	2090	4.02	3.99	2.23	15.13	10.36	13.55	2.43325	5.44157e-09	1.8508e-07	pdp2	XP_010728077.1	pyruvate dehydrogenase [acetyl-transferring]-phosphatase 2, mitochondrial [Larimichthys crocea]	GO:0046872;GO:0004722	metal ion binding;protein serine/threonine phosphatase activity	K01102	PDP	http://www.genome.jp/dbget-bin/www_bget?ko:K01102	-	-	KOG0700	Protein phosphatase 2C/pyruvate dehydrogenase (lipoamide) phosphatase	sp|Q9P2J9|PDP2_HUMAN	[Pyruvate dehydrogenase [acetyl-transferring]]-phosphatase 2, mitochondrial OS=Homo sapiens OX=9606 GN=PDP2 PE=2 SV=2
gene20143	1385	6.46	3.68	2.8	19.52	9.42	25.43	2.43248	1.25696e-08	3.88794e-07	aven	XP_027140055.1	cell death regulator Aven [Larimichthys crocea]	-	-	-	-	-	-	-	-	-	sp|Q9D9K3|AVEN_MOUSE	Cell death regulator Aven OS=Mus musculus OX=10090 GN=Aven PE=1 SV=2
gene16733	1620	24.58	20.54	16.22	83.07	73.91	76.16	2.43182	2.73942e-10	1.26863e-08	LOC104932663	XP_010746246.1;XP_027144272.1	UPF0415 protein C7orf25 homolog isoform X2 [Larimichthys crocea];UPF0415 protein C7orf25 homolog isoform X1 [Larimichthys crocea]	-	-	-	-	-	-	-	KOG4529	Uncharacterized conserved protein	sp|Q803H0|CG025_DANRE	UPF0415 protein C7orf25 homolog OS=Danio rerio OX=7955 GN=zgc:55781 PE=2 SV=1
novel.13422	586	3.97	5	9.17	38.01	17.7	10.6	2.43101	0.000397099	0.0029868	kbtbd12	XP_010744637.2	kelch repeat and BTB domain-containing protein 12 [Larimichthys crocea]	-	-	K21912	KBTBD12	http://www.genome.jp/dbget-bin/www_bget?ko:K21912	-	-	KOG4441	Proteins containing BTB/POZ and Kelch domains, involved in regulatory/signal transduction processes	sp|Q3ZB90|KBTBC_DANRE	Kelch repeat and BTB domain-containing protein 12 OS=Danio rerio OX=7955 GN=kbtbd12 PE=2 SV=1
gene21912	1478	3.5	8.62	10.15	33.56	26.57	26.77	2.43039	3.86429e-06	5.90998e-05	snx21	XP_019118871.1	sorting nexin-21 isoform X1 [Larimichthys crocea]	GO:0031901;GO:0035091;GO:0015031	early endosome membrane;phosphatidylinositol binding;protein transport	K17932	SNX21	http://www.genome.jp/dbget-bin/www_bget?ko:K17932	-	-	-	-	sp|Q3UR97|SNX21_MOUSE	Sorting nexin-21 OS=Mus musculus OX=10090 GN=Snx21 PE=1 SV=1
gene6471	1443	23.23	23.55	19.81	108.72	49.62	112.82	2.4269	1.40219e-11	8.70695e-10	ufd1l	XP_019120010.2	ubiquitin recognition factor in ER-associated degradation protein 1 [Larimichthys crocea]	GO:0071466;GO:0006511	cellular response to xenobiotic stimulus;ubiquitin-dependent protein catabolic process	K14016	UFD1	http://www.genome.jp/dbget-bin/www_bget?ko:K14016	Protein processing in endoplasmic reticulum	ko04141	KOG1816	Ubiquitin fusion-degradation protein	sp|Q92890|UFD1_HUMAN	Ubiquitin recognition factor in ER-associated degradation protein 1 OS=Homo sapiens OX=9606 GN=UFD1 PE=1 SV=3
gene14498	2127	8.43	10.55	9.62	36.4	34.65	36.92	2.42599	3.36905e-10	1.52599e-08	aspscr1	XP_027139005.1;KAE8301057.1	tether containing UBX domain for GLUT4 [Larimichthys crocea];hypothetical protein D5F01_LYC01210 [Larimichthys crocea]	GO:0003677;GO:0016021;GO:0007165;GO:0006310;GO:0015074	DNA binding;integral component of membrane;signal transduction;DNA recombination;DNA integration	K15627;K09228	ASPSCR1,ASPL;KRAB	http://www.genome.jp/dbget-bin/www_bget?ko:K15627;http://www.genome.jp/dbget-bin/www_bget?ko:K09228	Transcriptional misregulation in cancer;Herpes simplex virus 1 infection	ko05202,ko05168	-	-	sp|Q8VBT9|ASPC1_MOUSE	Tether containing UBX domain for GLUT4 OS=Mus musculus OX=10090 GN=Aspscr1 PE=1 SV=1
gene7793	2094	0.39	0.36	0.42	1.96	0.52	2.83	2.42584	9.04643e-05	0.000861724	ncs1	TMS03321.1	Neuronal calcium sensor 1 [Larimichthys crocea]	GO:0005509	calcium ion binding	K19932	NCS1	http://www.genome.jp/dbget-bin/www_bget?ko:K19932	-	-	KOG0044	Ca2+ sensor (EF-Hand superfamily)	sp|P62167|NCS1_CHICK	Neuronal calcium sensor 1 OS=Gallus gallus OX=9031 GN=NCS1 PE=1 SV=2
gene19004	2849	10.77	14.03	6.55	57.8	18.97	75.57	2.42247	1.57749e-08	4.73171e-07	dpp3	XP_019123170.1	dipeptidyl peptidase 3 [Larimichthys crocea]	GO:0008239;GO:0005737;GO:0070006;GO:0046872	dipeptidyl-peptidase activity;cytoplasm;metalloaminopeptidase activity;metal ion binding	K01277	DPP3	http://www.genome.jp/dbget-bin/www_bget?ko:K01277	-	-	-	-	sp|Q9NY33|DPP3_HUMAN	Dipeptidyl peptidase 3 OS=Homo sapiens OX=9606 GN=DPP3 PE=1 SV=2
novel.15033	1453	0.7	0.91	0.29	3.1	0.53	4.97	2.41689	0.000791682	0.00532574	-	-	-	-	-	-	-	-	-	-	-	-	-	-
gene21446	1857	5.16	6.83	2.94	29.9	10.8	16.28	2.41581	2.13034e-06	3.53762e-05	rad9a	XP_010752252.2	cell cycle checkpoint control protein RAD9A [Larimichthys crocea]	GO:0030896;GO:0000077;GO:0006281	checkpoint clamp complex;DNA damage checkpoint signaling;DNA repair	K10994	RAD9A	http://www.genome.jp/dbget-bin/www_bget?ko:K10994	Cellular senescence	ko04218	KOG2810	Checkpoint 9-1-1 complex, RAD9 component	sp|Q99638|RAD9A_HUMAN;sp|Q4R5X9|RAD9A_MACFA	Cell cycle checkpoint control protein RAD9A OS=Homo sapiens OX=9606 GN=RAD9A PE=1 SV=1;Cell cycle checkpoint control protein RAD9A OS=Macaca fascicularis OX=9541 GN=RAD9A PE=2 SV=1
gene16714	1718	1.52	1.15	1.24	7.68	3.34	3.87	2.41495	7.90444e-06	0.000108921	LOC104932651	TMS21630.1	Serine dehydratase-like [Larimichthys crocea]	GO:0003941;GO:0006520;GO:0030170	L-serine ammonia-lyase activity;cellular amino acid metabolic process;pyridoxal phosphate binding	K17989	SDS,SDH,CHA1	http://www.genome.jp/dbget-bin/www_bget?ko:K17989	Cysteine and methionine metabolism;Glycine, serine and threonine metabolism;Valine, leucine and isoleucine biosynthesis	ko00270,ko00260,ko00290	KOG1250	Threonine/serine dehydratases	sp|Q96GA7|SDSL_HUMAN	Serine dehydratase-like OS=Homo sapiens OX=9606 GN=SDSL PE=1 SV=1
gene15263	1671	41.11	4.02	36.7	127.65	98.11	90.81	2.41471	0.000771652	0.00521934	bzw2	XP_010744304.2;TKS65655.1	basic leucine zipper and W2 domain-containing protein 2 [Larimichthys crocea];Basic leucine zipper and W2 domain-containing protein 2 [Collichthys lucidus]	-	-	-	-	-	-	-	KOG2297	Predicted translation factor, contains W2 domain	sp|Q1LUC1|BZW2_DANRE	Basic leucine zipper and W2 domain-containing protein 2 OS=Danio rerio OX=7955 GN=bzw2 PE=2 SV=1
gene17091	2897	0.25	0.4	0.39	4.12	0.67	3.32	2.40987	4.79485e-05	0.000502951	LOC104933049	KAE8287324.1	Beta-2 adrenergic receptor Beta-2 adrenoreceptor [Larimichthys crocea]	GO:0097746;GO:0016021;GO:0006940;GO:0004941;GO:0005886;GO:0007189	blood vessel diameter maintenance;integral component of membrane;regulation of smooth muscle contraction;beta2-adrenergic receptor activity;plasma membrane;adenylate cyclase-activating G protein-coupled receptor signaling pathway	K04142	ADRB2	http://www.genome.jp/dbget-bin/www_bget?ko:K04142	Calcium signaling pathway;cAMP signaling pathway;cGMP-PKG signaling pathway;Neuroactive ligand-receptor interaction;Chemical carcinogenesis - receptor activation;Adrenergic signaling in cardiomyocytes;Salivary secretion;Regulation of lipolysis in adipocytes;Renin secretion	ko04020,ko04024,ko04022,ko04080,ko05207,ko04261,ko04970,ko04923,ko04924	KOG3656	FOG: 7 transmembrane receptor	sp|Q8UUY8|ADRB2_ONCMY	Beta-2 adrenergic receptor OS=Oncorhynchus mykiss OX=8022 GN=adrb2 PE=2 SV=1
gene5989	875	3.56	5.72	0.8	8.86	9.23	23.96	2.40901	5.95527e-05	0.000608194	LOC104921122	XP_010731875.3	peptidoglycan-recognition protein SC2 [Larimichthys crocea]	GO:0042742;GO:0009253;GO:0008745;GO:0008270;GO:0045087;GO:0042834	defense response to bacterium;peptidoglycan catabolic process;N-acetylmuramoyl-L-alanine amidase activity;zinc ion binding;innate immune response;peptidoglycan binding	K01446	PGRP	http://www.genome.jp/dbget-bin/www_bget?ko:K01446	Toll and Imd signaling pathway	ko04624	-	-	sp|Q9V4X2|PGSC2_DROME	Peptidoglycan-recognition protein SC2 OS=Drosophila melanogaster OX=7227 GN=PGRP-SC2 PE=2 SV=1
gene13289	1056	1.29	1.24	1.06	5.78	1.67	8.12	2.40672	2.20763e-05	0.000262837	armc7	KAE8283917.1	Armadillo repeat-containing protein 7 [Larimichthys crocea]	-	-	K24825	ARMC7	http://www.genome.jp/dbget-bin/www_bget?ko:K24825	-	-	-	-	sp|Q3UJZ3|ARMC7_MOUSE	Armadillo repeat-containing protein 7 OS=Mus musculus OX=10090 GN=Armc7 PE=1 SV=2
gene9824	1361	0.55	0.99	0.7	3.41	1.25	4.98	2.40639	2.58939e-05	0.000300069	gdpgp1	TMS05041.1	GDP-D-glucose phosphorylase 1 [Larimichthys crocea]	GO:0005737;GO:0000166;GO:0016779;GO:0016787;GO:0080048	cytoplasm;nucleotide binding;nucleotidyltransferase activity;hydrolase activity;GDP-D-glucose phosphorylase activity	K15630	VTC2	http://www.genome.jp/dbget-bin/www_bget?ko:K15630	-	-	KOG2720	Predicted hydrolase (HIT family)	sp|Q08CA1|GDPP1_DANRE	GDP-D-glucose phosphorylase 1 OS=Danio rerio OX=7955 GN=gdpgp1 PE=2 SV=1
gene21751	1218	2.77	3.36	11.91	4.85	14.2	75.64	2.40261	0.00267154	0.0145537	LOC104937999	XP_010752628.1	growth-regulated alpha protein [Larimichthys crocea]	GO:0006955;GO:0008009;GO:0005615	immune response;chemokine activity;extracellular space	K10030	IL8,CXCL8	http://www.genome.jp/dbget-bin/www_bget?ko:K10030	Cellular senescence;NF-kappa B signaling pathway;Phospholipase D signaling pathway;Cytokine-cytokine receptor interaction;Viral protein interaction with cytokine and cytokine receptor;Pathways in cancer;Transcriptional misregulation in cancer;Bladder cancer;Lipid and atherosclerosis;AGE-RAGE signaling pathway in diabetic complications;Alcoholic liver disease;Non-alcoholic fatty liver disease;Rheu…	ko04218,ko04064,ko04072,ko04060,ko04061,ko05200,ko05202,ko05219,ko05417,ko04933,ko04936,ko04932,ko05323,ko05120,ko05134,ko05130,ko05133,ko05132,ko05131,ko05135,ko05146,ko05142,ko05144,ko05171,ko05161,ko05163,ko05164,ko05167,ko04062,ko04657,ko04621,ko04622,ko04620	-	-	-	-
gene3756	2178	13.44	13.59	15.69	65.76	39.63	62.97	2.40105	3.27696e-11	1.82589e-09	ubfd1	XP_010728855.1	ubiquitin domain-containing protein UBFD1 isoform X1 [Larimichthys crocea]	-	-	-	-	-	-	-	-	-	sp|Q78JW9|UBFD1_MOUSE;sp|O14562|UBFD1_HUMAN	Ubiquitin domain-containing protein UBFD1 OS=Mus musculus OX=10090 GN=Ubfd1 PE=1 SV=2;Ubiquitin domain-containing protein UBFD1 OS=Homo sapiens OX=9606 GN=UBFD1 PE=1 SV=2
novel.16033	748	7.65	7.7	8.27	34.57	32.45	15.44	2.40039	2.01431e-05	0.000243447	-	KAF5161291.1	hypothetical protein HST_G00154060 [Hippoglossus stenolepis]	GO:0016598	protein arginylation	-	-	-	-	-	-	-	-	-
gene21847	1454	3.07	1.46	4.33	2.49	19.83	8.33	2.39947	0.0024631	0.0136523	LOC104938087	TMS01056.1	hypothetical protein E3U43_016797 [Larimichthys crocea]	GO:0005615;GO:0004252	extracellular space;serine-type endopeptidase activity	K09614	CORIN	http://www.genome.jp/dbget-bin/www_bget?ko:K09614	-	-	-	-	sp|Q9Y5Q5|CORIN_HUMAN	Atrial natriuretic peptide-converting enzyme OS=Homo sapiens OX=9606 GN=CORIN PE=1 SV=2
gene12613	1897	6.5	6.72	3.96	21.07	22.48	10.37	2.39727	2.43109e-05	0.000285328	LOC104928258	XP_034048629.1;XP_010740809.1	E3 ubiquitin-protein ligase RNF170 [Thalassophryne amazonica];E3 ubiquitin-protein ligase RNF170 [Larimichthys crocea]	GO:0046872;GO:0061630;GO:0005789;GO:0016021	metal ion binding;ubiquitin protein ligase activity;endoplasmic reticulum membrane;integral component of membrane	K15707	RNF170	http://www.genome.jp/dbget-bin/www_bget?ko:K15707	-	-	KOG2164	Predicted E3 ubiquitin ligase	sp|Q7SZN2|RN170_DANRE	E3 ubiquitin-protein ligase RNF170 OS=Danio rerio OX=7955 GN=rnf170 PE=2 SV=1
gene23101	1984	3.05	2.01	4.56	5.77	17.18	12.92	2.39545	6.67781e-05	0.000669565	LOC104939420	XP_010754262.1	corticosteroid 11-beta-dehydrogenase isozyme 2 [Larimichthys crocea]	GO:0033555;GO:0034650;GO:0016491;GO:0016021	multicellular organismal response to stress;cortisol metabolic process;oxidoreductase activity;integral component of membrane	K00071	HSD11B2	http://www.genome.jp/dbget-bin/www_bget?ko:K00071	Steroid hormone biosynthesis;Aldosterone-regulated sodium reabsorption	ko00140,ko04960	-	-	sp|P50233|DHI2_RAT	Corticosteroid 11-beta-dehydrogenase isozyme 2 OS=Rattus norvegicus OX=10116 GN=Hsd11b2 PE=1 SV=1
gene11947	1314	8.96	6.25	9.16	41.14	19.48	36.82	2.39511	7.89253e-09	2.58658e-07	hax1	XP_010739956.2	HCLS1-associated protein X-1 isoform X1 [Larimichthys crocea]	GO:0043066	negative regulation of apoptotic process	K16220	HAX1	http://www.genome.jp/dbget-bin/www_bget?ko:K16220	-	-	-	-	sp|O00165|HAX1_HUMAN	HCLS1-associated protein X-1 OS=Homo sapiens OX=9606 GN=HAX1 PE=1 SV=2
gene9730	2551	1.53	1.13	2.73	10.65	3.59	7.87	2.3948	1.27425e-05	0.000163492	LOC104925175	TMS17621.1	Type-1 angiotensin II receptor B [Larimichthys crocea]	GO:0004930;GO:0016021	G protein-coupled receptor activity;integral component of membrane	K04167	AGTR2	http://www.genome.jp/dbget-bin/www_bget?ko:K04167	Neuroactive ligand-receptor interaction;Adrenergic signaling in cardiomyocytes;Renin-angiotensin system	ko04080,ko04261,ko04614	-	-	sp|P50052|AGTR2_HUMAN	Type-2 angiotensin II receptor OS=Homo sapiens OX=9606 GN=AGTR2 PE=1 SV=1
gene7522	971	58.54	82.99	72.5	275.61	236.21	316.44	2.39464	6.75626e-12	4.40508e-10	LOC104922789	XP_010734019.1	proteasome subunit alpha type-4 [Larimichthys crocea]	GO:0019773;GO:0005737;GO:0006511;GO:0004298;GO:0005634	proteasome core complex, alpha-subunit complex;cytoplasm;ubiquitin-dependent protein catabolic process;threonine-type endopeptidase activity;nucleus	K02728	PSMA4	http://www.genome.jp/dbget-bin/www_bget?ko:K02728	Proteasome;Alzheimer disease;Amyotrophic lateral sclerosis;Huntington disease;Parkinson disease;Pathways of neurodegeneration - multiple diseases;Prion disease;Spinocerebellar ataxia	ko03050,ko05010,ko05014,ko05016,ko05012,ko05022,ko05020,ko05017	KOG0178	20S proteasome, regulatory subunit alpha type PSMA4/PRE9	sp|P21670|PSA4_RAT	Proteasome subunit alpha type-4 OS=Rattus norvegicus OX=10116 GN=Psma4 PE=1 SV=1
gene1603	1359	3.34	2.87	2.26	14.34	4.13	17.34	2.39272	4.91895e-07	9.93251e-06	LOC104932050	XP_010745497.3	peptidyl-prolyl cis-trans isomerase FKBP5 isoform X2 [Larimichthys crocea]	-	-	K20097	FKBPL	http://www.genome.jp/dbget-bin/www_bget?ko:K20097	-	-	KOG0543	FKBP-type peptidyl-prolyl cis-trans isomerase	sp|O35450|FKBPL_MOUSE	FK506-binding protein-like OS=Mus musculus OX=10090 GN=Fkbpl PE=2 SV=1
gene8384	775	9.73	9.21	9	26.76	34.77	50.39	2.38828	1.16386e-10	5.8254e-09	LOC104923721	KAE8296543.1;XP_027128673.1	Protein C19orf12-like protein [Larimichthys crocea];protein C19orf12 homolog isoform X2 [Larimichthys crocea]	GO:0016021;GO:0031966;GO:0005829;GO:0005783	integral component of membrane;mitochondrial membrane;cytosol;endoplasmic reticulum	K23168	MPAN	http://www.genome.jp/dbget-bin/www_bget?ko:K23168	-	-	-	-	sp|Q1L990|CS012_DANRE	Protein C19orf12 homolog OS=Danio rerio OX=7955 GN=si:ch211-238a12.2 PE=2 SV=1
gene14357	2432	0.25	0.15	0.35	0.74	0.68	1.76	2.38759	0.000167701	0.00144873	LOC104930117	XP_010743129.1	calcium-binding mitochondrial carrier protein SCaMC-3 [Larimichthys crocea]	GO:0016021;GO:0055085;GO:0005743;GO:0005509	integral component of membrane;transmembrane transport;mitochondrial inner membrane;calcium ion binding	K14684	SLC25A23S	http://www.genome.jp/dbget-bin/www_bget?ko:K14684	-	-	KOG0036	Predicted mitochondrial carrier protein	sp|Q6GQS1|SCMC3_MOUSE	Calcium-binding mitochondrial carrier protein SCaMC-3 OS=Mus musculus OX=10090 GN=Slc25a23 PE=1 SV=1
gene21096	1028	0.9	0.28	0.93	1.66	2.9	4.06	2.3861	0.000401672	0.00301114	LOC104937288	XP_027129127.1	diacylglycerol O-acyltransferase 2 isoform X1 [Larimichthys crocea]	GO:0005789;GO:0016021;GO:0016747	endoplasmic reticulum membrane;integral component of membrane;acyltransferase activity, transferring groups other than amino-acyl groups	K11160	DGAT2	http://www.genome.jp/dbget-bin/www_bget?ko:K11160	Glycerolipid metabolism;Fat digestion and absorption	ko00561,ko04975	KOG0831	Acyl-CoA:diacylglycerol acyltransferase (DGAT)	sp|Q6PAZ3|DGAT2_XENLA	Diacylglycerol O-acyltransferase 2 OS=Xenopus laevis OX=8355 GN=dgat2 PE=2 SV=1
gene9472	2513	5.09	4.85	3.68	12.57	14.67	27.54	2.38341	6.62887e-13	5.38482e-11	narf	XP_010736677.1;XP_019119037.1	nuclear prelamin A recognition factor isoform X1 [Larimichthys crocea];nuclear prelamin A recognition factor isoform X2 [Larimichthys crocea]	-	-	-	-	-	-	-	KOG2439	Nuclear architecture related protein	sp|Q6DHP6|NARF_DANRE	Nuclear prelamin A recognition factor OS=Danio rerio OX=7955 GN=narf PE=2 SV=1
gene12942	2375	0.62	2.34	1.48	5.31	5.85	4.66	2.38206	3.78443e-05	0.000413417	LOC104928607	XP_010741225.1	proton-coupled amino acid transporter 1 isoform X1 [Larimichthys crocea]	GO:0016021	integral component of membrane	K14209	SLC36A,PAT	http://www.genome.jp/dbget-bin/www_bget?ko:K14209	Protein digestion and absorption	ko04974	KOG1304	Amino acid transporters	sp|Q924A5|S36A1_RAT	Proton-coupled amino acid transporter 1 OS=Rattus norvegicus OX=10116 GN=Slc36a1 PE=2 SV=1
gene10444	2069	0.73	2.28	1.58	6.65	3.62	8.35	2.38085	1.58923e-06	2.74586e-05	LOC104925932	XP_004075363.1	14-3-3 protein gamma [Oryzias latipes]	-	-	K16198	YWHAG_H	http://www.genome.jp/dbget-bin/www_bget?ko:K16198	Cell cycle;Oocyte meiosis;Hippo signaling pathway;PI3K-Akt signaling pathway;Viral carcinogenesis;Hepatitis C	ko04110,ko04114,ko04390,ko04151,ko05203,ko05160	-	-	sp|Q6UFZ2|143G2_ONCMY	14-3-3 protein gamma-2 OS=Oncorhynchus mykiss OX=8022 PE=2 SV=1
gene4527	3182	1.25	0.94	1.19	8.72	0.3	4.37	2.37889	0.00371539	0.0190585	slc16a9	TMS04294.1	Monocarboxylate transporter 9 [Larimichthys crocea]	GO:0016021;GO:0022857	integral component of membrane;transmembrane transporter activity	K08186	SLC16A9	http://www.genome.jp/dbget-bin/www_bget?ko:K08186	-	-	-	-	sp|Q7RTY1|MOT9_HUMAN	Monocarboxylate transporter 9 OS=Homo sapiens OX=9606 GN=SLC16A9 PE=1 SV=1
gene12524	388	72.94	33.16	23.56	96.37	223.09	17.08	2.37788	0.00628469	0.0290937	LOC104928179	-	-	-	-	-	-	-	-	-	-	-	-	-
gene17881	2517	22.3	27.67	23.86	112.23	61.66	103.7	2.37783	4.48364e-11	2.40969e-09	cul1	XP_027131263.1;RXN25257.1	cullin-1 isoform X2 [Larimichthys crocea];cullin-1 [Labeo rohita]	GO:0006511;GO:0031625;GO:0016567;GO:0031461	ubiquitin-dependent protein catabolic process;ubiquitin protein ligase binding;protein ubiquitination;cullin-RING ubiquitin ligase complex	K03347	CUL1,CDC53	http://www.genome.jp/dbget-bin/www_bget?ko:K03347	Cell cycle;Oocyte meiosis;Hedgehog signaling pathway;Hedgehog signaling pathway - fly;TGF-beta signaling pathway;Wnt signaling pathway;Protein processing in endoplasmic reticulum;Ubiquitin mediated proteolysis;Pathways in cancer;Shigellosis;Human immunodeficiency virus 1 infection;Circadian rhythm	ko04110,ko04114,ko04340,ko04341,ko04350,ko04310,ko04141,ko04120,ko05200,ko05131,ko05170,ko04710	KOG2284	E3 ubiquitin ligase, Cullin 2 component	sp|Q9WTX6|CUL1_MOUSE;sp|Q13616|CUL1_HUMAN	Cullin-1 OS=Mus musculus OX=10090 GN=Cul1 PE=1 SV=1;Cullin-1 OS=Homo sapiens OX=9606 GN=CUL1 PE=1 SV=2
gene21709	1402	2.73	2.48	3.43	13.38	8.45	11.24	2.3777	6.46381e-08	1.65613e-06	sav1	TKS87051.1	Protein salvador -like protein 1 45 kDa WW domain protein [Collichthys lucidus]	GO:0006915;GO:0042127;GO:0035329;GO:0060090	apoptotic process;regulation of cell population proliferation;hippo signaling;molecular adaptor activity	K16686	SAV1,Sav	http://www.genome.jp/dbget-bin/www_bget?ko:K16686	Apoptosis - fly;Hippo signaling pathway;Hippo signaling pathway - fly;Hippo signaling pathway - multiple species	ko04214,ko04390,ko04391,ko04392	-	-	sp|Q9H4B6|SAV1_HUMAN	Protein salvador homolog 1 OS=Homo sapiens OX=9606 GN=SAV1 PE=1 SV=2
gene1687	4965	0.42	0.39	0.55	1.73	2.09	1.9	2.37756	3.11245e-07	6.65351e-06	LOC104932960	TMS16276.1	Fidgetin [Larimichthys crocea]	GO:0016887;GO:0005524	ATP hydrolysis activity;ATP binding	-	-	-	-	-	KOG0740	AAA+-type ATPase	sp|Q5HY92|FIGN_HUMAN	Fidgetin OS=Homo sapiens OX=9606 GN=FIGN PE=1 SV=2
gene6634	2816	2.6	3.74	1.1	8.74	4.85	18.34	2.37675	8.33277e-07	1.55579e-05	acer1	XP_010732778.1	alkaline ceramidase 1 [Larimichthys crocea]	GO:0102121;GO:0016021;GO:0006672;GO:0017040	ceramidase activity;integral component of membrane;ceramide metabolic process;N-acylsphingosine amidohydrolase activity	K01441	ACER1_2,ASAH3	http://www.genome.jp/dbget-bin/www_bget?ko:K01441	Sphingolipid signaling pathway;Sphingolipid metabolism	ko04071,ko00600	KOG2329	Alkaline ceramidase	sp|Q568I2|ACER1_DANRE	Alkaline ceramidase 1 OS=Danio rerio OX=7955 GN=acer1 PE=2 SV=1
gene22101	1168	3.28	6.42	7.71	34.04	10.44	23.36	2.37573	9.929e-06	0.000132187	LOC104938362	XP_019110870.2;XP_010753046.3	syndecan-4 isoform X1 [Larimichthys crocea];syndecan-4 isoform X2 [Larimichthys crocea]	GO:0016021	integral component of membrane	K16338	SDC4	http://www.genome.jp/dbget-bin/www_bget?ko:K16338	Cell adhesion molecules;ECM-receptor interaction;Proteoglycans in cancer;Fluid shear stress and atherosclerosis	ko04514,ko04512,ko05205,ko05418	-	-	sp|P49416|SDC4_CHICK;sp|P34901|SDC4_RAT	Syndecan-4 OS=Gallus gallus OX=9031 GN=SDC4 PE=1 SV=1;Syndecan-4 OS=Rattus norvegicus OX=10116 GN=Sdc4 PE=1 SV=1
gene8961	1233	3.8	4.68	5.52	5.62	9.19	57	2.37316	0.000168706	0.00145539	LOC104924349	TKS68123.1;AEK98796.1	F-box only protein 10 [Collichthys lucidus];interlukin-8 [Larimichthys crocea]	GO:0006954;GO:0016567;GO:0005576;GO:0005615;GO:0005153;GO:0030593;GO:0016021;GO:0006952;GO:0008009;GO:0042119;GO:0006955	inflammatory response;protein ubiquitination;extracellular region;extracellular space;interleukin-8 receptor binding;neutrophil chemotaxis;integral component of membrane;defense response;chemokine activity;neutrophil activation;immune response	K10030	IL8,CXCL8	http://www.genome.jp/dbget-bin/www_bget?ko:K10030	Cellular senescence;NF-kappa B signaling pathway;Phospholipase D signaling pathway;Cytokine-cytokine receptor interaction;Viral protein interaction with cytokine and cytokine receptor;Pathways in cancer;Transcriptional misregulation in cancer;Bladder cancer;Lipid and atherosclerosis;AGE-RAGE signaling pathway in diabetic complications;Alcoholic liver disease;Non-alcoholic fatty liver disease;Rheu…	ko04218,ko04064,ko04072,ko04060,ko04061,ko05200,ko05202,ko05219,ko05417,ko04933,ko04936,ko04932,ko05323,ko05120,ko05134,ko05130,ko05133,ko05132,ko05131,ko05135,ko05146,ko05142,ko05144,ko05171,ko05161,ko05163,ko05164,ko05167,ko04062,ko04657,ko04621,ko04622,ko04620	-	-	sp|P08317|IL8_CHICK	Interleukin-8 OS=Gallus gallus OX=9031 GN=CXCL8 PE=2 SV=1
gene22364	774	2.83	3.81	6.22	31.91	19.51	11.73	2.36867	0.000764665	0.00517916	dnajc27	XP_020474816.1	dnaJ homolog subfamily C member 27 isoform X2 [Monopterus albus]	GO:0005525;GO:0003924	GTP binding;GTPase activity	K19372	DNAJC27	http://www.genome.jp/dbget-bin/www_bget?ko:K19372	-	-	KOG0714;KOG0088	Molecular chaperone (DnaJ superfamily);GTPase Rab21, small G protein superfamily	sp|Q6IMK3|DJC27_DANRE	DnaJ homolog subfamily C member 27 OS=Danio rerio OX=7955 GN=dnajc27 PE=2 SV=1
gene10334	5282	7.71	8.85	8.17	52.04	20.98	18.76	2.36739	7.43178e-06	0.000103735	LOC104925809	XP_010737815.2;XP_010737818.2;XP_010737817.2;KAE8287384.1	protein phosphatase Slingshot homolog 2-like isoform X1 [Larimichthys crocea];protein phosphatase Slingshot homolog 2-like isoform X3 [Larimichthys crocea];protein phosphatase Slingshot homolog 2-like isoform X2 [Larimichthys crocea];Protein phosphatase Slingshot-like protein 2 [Larimichthys crocea]	GO:0005856;GO:0003779;GO:0008138;GO:0004725;GO:0106307;GO:0030837;GO:0106306	cytoskeleton;actin binding;protein tyrosine/serine/threonine phosphatase activity;protein tyrosine phosphatase activity;protein threonine phosphatase activity;negative regulation of actin filament polymerization;protein serine phosphatase activity	K05766	SSH	http://www.genome.jp/dbget-bin/www_bget?ko:K05766	Regulation of actin cytoskeleton;Axon guidance	ko04810,ko04360	-	-	sp|Q76I76|SSH2_HUMAN	Protein phosphatase Slingshot homolog 2 OS=Homo sapiens OX=9606 GN=SSH2 PE=1 SV=1
gene23291	2293	11.57	11.05	13.18	55.26	29.98	55.82	2.36702	3.7687e-11	2.06578e-09	nus1	XP_010754476.1	dehydrodolichyl diphosphate synthase complex subunit NUS1 [Larimichthys crocea]	GO:0019408;GO:0006486;GO:0002040;GO:0016021;GO:0016765;GO:0005783;GO:1904423	dolichol biosynthetic process;protein glycosylation;sprouting angiogenesis;integral component of membrane;transferase activity, transferring alkyl or aryl (other than methyl) groups;endoplasmic reticulum;dehydrodolichyl diphosphate synthase complex	K19177	NUS1	http://www.genome.jp/dbget-bin/www_bget?ko:K19177	Terpenoid backbone biosynthesis	ko00900	KOG2818	Predicted undecaprenyl diphosphate synthase	sp|Q6DHR8|NGBR_DANRE	Dehydrodolichyl diphosphate synthase complex subunit nus1 OS=Danio rerio OX=7955 GN=nus1 PE=2 SV=1
gene19863	984	1.84	0.83	0.87	5.2	3.02	5.41	2.364	2.61279e-05	0.00030203	ybey	XP_027138264.1	endoribonuclease YbeY [Larimichthys crocea]	GO:0006364;GO:0004222;GO:0046872;GO:0004519	rRNA processing;metalloendopeptidase activity;metal ion binding;endonuclease activity	-	-	-	-	-	-	-	sp|P58557|YBEY_HUMAN	Endoribonuclease YbeY OS=Homo sapiens OX=9606 GN=YBEY PE=1 SV=2
gene11132	3899	2.42	3.73	2.6	7.35	6.45	24.88	2.36364	1.43465e-08	4.37383e-07	LOC104926679	KAE8300050.1;XP_019129801.2	Low-density lipoprotein receptor [Larimichthys crocea];low-density lipoprotein receptor [Larimichthys crocea]	GO:0005509;GO:0006897;GO:0016021	calcium ion binding;endocytosis;integral component of membrane	K12473	LDLR	http://www.genome.jp/dbget-bin/www_bget?ko:K12473	Endocytosis;Lipid and atherosclerosis;Cushing syndrome;Toxoplasmosis;Hepatitis C;Bile secretion;Cholesterol metabolism;Aldosterone synthesis and secretion;Cortisol synthesis and secretion;Ovarian steroidogenesis	ko04144,ko05417,ko04934,ko05145,ko05160,ko04976,ko04979,ko04925,ko04927,ko04913	-	-	sp|P01130|LDLR_HUMAN	Low-density lipoprotein receptor OS=Homo sapiens OX=9606 GN=LDLR PE=1 SV=1
gene23829	315	12	15.89	17.35	27.9	84.39	37.27	2.36276	0.00107207	0.00683697	LOC104940170	XP_027140680.1	myosin heavy chain, fast skeletal muscle [Larimichthys crocea]	-	-	K24220	MYH1s	http://www.genome.jp/dbget-bin/www_bget?ko:K24220	-	-	-	-	sp|Q90339|MYSS_CYPCA	Myosin heavy chain, fast skeletal muscle OS=Cyprinus carpio OX=7962 PE=2 SV=2
gene19948	1974	2.44	4.01	3.33	16.96	6.52	13.03	2.36108	2.80008e-07	6.08551e-06	ergic1	XP_027135604.1	endoplasmic reticulum-Golgi intermediate compartment protein 1 [Larimichthys crocea]	GO:0033116;GO:0016192;GO:0016021	endoplasmic reticulum-Golgi intermediate compartment membrane;vesicle-mediated transport;integral component of membrane	K20365	ERGIC1	http://www.genome.jp/dbget-bin/www_bget?ko:K20365	-	-	KOG2667	COPII vesicle protein	sp|Q4V8Y6|ERGI1_DANRE	Endoplasmic reticulum-Golgi intermediate compartment protein 1 OS=Danio rerio OX=7955 GN=ergic1 PE=2 SV=1
gene634	358	49.35	184.18	144.23	250.15	246.52	215.03	2.36088	8.90061e-07	1.64938e-05	LOC104921577	-	-	-	-	-	-	-	-	-	-	-	-	-
gene15350	2261	5.68	5.92	7.44	27.05	14.64	30.38	2.3598	1.12894e-10	5.7045e-09	prmt5	XP_019112821.2;TKS80286.1	protein arginine N-methyltransferase 5 [Larimichthys crocea];Protein arginine N-methyltransferase 5 [Collichthys lucidus]	GO:0043985;GO:0016021;GO:0008469;GO:0005829;GO:0005634;GO:0022857;GO:0035243;GO:0048742;GO:0016274	histone H4-R3 methylation;integral component of membrane;histone-arginine N-methyltransferase activity;cytosol;nucleus;transmembrane transporter activity;protein-arginine omega-N symmetric methyltransferase activity;regulation of skeletal muscle fiber development;protein-arginine N-methyltransferase activity	K02516	PRMT5,HSL7	http://www.genome.jp/dbget-bin/www_bget?ko:K02516	-	-	KOG0822	Protein kinase inhibitor	sp|Q6NUA1|ANM5_XENLA;sp|A7YW45|ANM5_BOVIN;sp|Q5R698|ANM5_PONAB	Protein arginine N-methyltransferase 5 OS=Xenopus laevis OX=8355 GN=prmt5 PE=1 SV=1;Protein arginine N-methyltransferase 5 OS=Bos taurus OX=9913 GN=PRMT5 PE=2 SV=1;Protein arginine N-methyltransferase 5 OS=Pongo abelii OX=9601 GN=PRMT5 PE=2 SV=3
gene21046	3845	21.31	17.13	38.58	116.54	89.82	78.82	2.35777	4.96031e-06	7.25911e-05	dusp27	XP_010751724.3;KAE8278335.1	inactive dual specificity phosphatase 27 isoform X1 [Larimichthys crocea];Inactive dual specificity phosphatase 27 [Larimichthys crocea]	GO:0008138;GO:0016021	protein tyrosine/serine/threonine phosphatase activity;integral component of membrane	K14165	K14165	http://www.genome.jp/dbget-bin/www_bget?ko:K14165	-	-	KOG1716	Dual specificity phosphatase	sp|F1QWM2|STYL2_DANRE	Serine/threonine/tyrosine-interacting-like protein 2 OS=Danio rerio OX=7955 GN=styxl2 PE=1 SV=1
gene23661	1210	1.01	2.07	1.76	3.49	4.36	13.1	2.35755	1.04388e-05	0.000138145	LOC104940012	KAE8281475.1	hypothetical protein D5F01_LYC20461 [Larimichthys crocea]	GO:0016021;GO:0030368	integral component of membrane;interleukin-17 receptor activity	-	-	-	-	-	-	-	sp|Q6ZVW7|I17EL_HUMAN	Putative interleukin-17 receptor E-like OS=Homo sapiens OX=9606 GN=IL17REL PE=2 SV=2
gene3236	1055	1.6	0.55	1.5	1.18	2.95	12.98	2.35706	0.00203304	0.0116626	LOC104918156	XP_010728104.1	receptor activity-modifying protein 3 [Larimichthys crocea]	GO:0016021;GO:0006886;GO:0015026;GO:0008277	integral component of membrane;intracellular protein transport;coreceptor activity;regulation of G protein-coupled receptor signaling pathway	K08449	RAMP3	http://www.genome.jp/dbget-bin/www_bget?ko:K08449	Vascular smooth muscle contraction	ko04270	-	-	sp|O60896|RAMP3_HUMAN	Receptor activity-modifying protein 3 OS=Homo sapiens OX=9606 GN=RAMP3 PE=1 SV=1
gene1969	1887	28.7	58	58.26	196.78	197.79	115.52	2.3566	4.31688e-06	6.46644e-05	phkg1	XP_010750876.1	phosphorylase b kinase gamma catalytic chain, skeletal muscle/heart isoform [Larimichthys crocea]	GO:0004689;GO:0005964;GO:0005516;GO:0005524;GO:0005978	phosphorylase kinase activity;phosphorylase kinase complex;calmodulin binding;ATP binding;glycogen biosynthetic process	K00871	PHKG	http://www.genome.jp/dbget-bin/www_bget?ko:K00871	Calcium signaling pathway;Glucagon signaling pathway;Insulin signaling pathway	ko04020,ko04922,ko04910	KOG0599	Phosphorylase kinase gamma subunit	sp|Q16816|PHKG1_HUMAN	Phosphorylase b kinase gamma catalytic chain, skeletal muscle/heart isoform OS=Homo sapiens OX=9606 GN=PHKG1 PE=2 SV=3
gene3431	950	0.82	1.01	0.59	2.06	0.36	9.21	2.35646	0.00630485	0.0291652	LOC104918368	XP_010728396.3;XP_010728397.3	integumentary mucin A.1 isoform X3 [Larimichthys crocea];integumentary mucin A.1 isoform X2 [Larimichthys crocea]	GO:0016021	integral component of membrane	-	-	-	-	-	-	-	-	-
novel.18409	716	15.1	26.15	17.6	77.15	68.91	70.58	2.35646	1.5136e-08	4.56772e-07	PSMB6	XP_019116564.1	proteasome subunit beta type-6 [Larimichthys crocea]	GO:0004298;GO:0005634;GO:0005737;GO:0005839;GO:0051603	threonine-type endopeptidase activity;nucleus;cytoplasm;proteasome core complex;proteolysis involved in cellular protein catabolic process	K02738	PSMB6	http://www.genome.jp/dbget-bin/www_bget?ko:K02738	Proteasome;Alzheimer disease;Amyotrophic lateral sclerosis;Huntington disease;Parkinson disease;Pathways of neurodegeneration - multiple diseases;Prion disease;Spinocerebellar ataxia	ko03050,ko05010,ko05014,ko05016,ko05012,ko05022,ko05020,ko05017	KOG0174	20S proteasome, regulatory subunit beta type PSMB6/PSMB9/PRE3	sp|P28072|PSB6_HUMAN	Proteasome subunit beta type-6 OS=Homo sapiens OX=9606 GN=PSMB6 PE=1 SV=4
gene3477	2163	2.4	5.66	6.04	11.66	22.59	15.52	2.35515	3.32795e-05	0.00037225	ell	TMS20672.1	RNA polymerase II elongation factor ELL [Larimichthys crocea]	GO:0042795;GO:0008023;GO:0003746;GO:0006368	snRNA transcription by RNA polymerase II;transcription elongation factor complex;translation elongation factor activity;transcription elongation from RNA polymerase II promoter	K15183	ELL	http://www.genome.jp/dbget-bin/www_bget?ko:K15183	-	-	-	-	sp|P55199|ELL_HUMAN	RNA polymerase II elongation factor ELL OS=Homo sapiens OX=9606 GN=ELL PE=1 SV=1
gene9855	3930	0.75	2.47	0.74	8.38	2.52	3.28	2.35494	0.000298772	0.00234996	lpin2	XP_019127180.1;XP_027129891.1	phosphatidate phosphatase LPIN2 isoform X2 [Larimichthys crocea];phosphatidate phosphatase LPIN2 isoform X1 [Larimichthys crocea]	GO:0008195	phosphatidate phosphatase activity	K15728	LPIN	http://www.genome.jp/dbget-bin/www_bget?ko:K15728	mTOR signaling pathway;Alcoholic liver disease;Glycerolipid metabolism;Glycerophospholipid metabolism	ko04150,ko04936,ko00561,ko00564	KOG2116	Protein involved in plasmid maintenance/nuclear protein involved in lipid metabolism	sp|Q99PI5|LPIN2_MOUSE;sp|Q92539|LPIN2_HUMAN	Phosphatidate phosphatase LPIN2 OS=Mus musculus OX=10090 GN=Lpin2 PE=1 SV=2;Phosphatidate phosphatase LPIN2 OS=Homo sapiens OX=9606 GN=LPIN2 PE=1 SV=1
gene18955	1740	7.47	1.8	5.61	8.49	8.73	54.51	2.35491	0.000401156	0.0030091	LOC104935031	KAE8289148.1;XP_027142219.1;XP_027142217.1	Protein C-ets-1 p54 [Larimichthys crocea];protein c-ets-1-B-like isoform X3 [Larimichthys crocea];protein c-ets-1-B-like isoform X1 [Larimichthys crocea]	GO:0043565;GO:0003700;GO:0005634	sequence-specific DNA binding;DNA-binding transcription factor activity;nucleus	K02678	ETS1,pnt	http://www.genome.jp/dbget-bin/www_bget?ko:K02678	Cellular senescence;MAPK signaling pathway - fly;Ras signaling pathway;Pathways in cancer;Renal cell carcinoma;Human T-cell leukemia virus 1 infection;Dorso-ventral axis formation	ko04218,ko04013,ko04014,ko05200,ko05211,ko05166,ko04320	KOG3806	Predicted transcription factor	sp|P18756|ETS1B_XENLA	Protein c-ets-1-B (Fragment) OS=Xenopus laevis OX=8355 GN=ets1-b PE=2 SV=1
gene19384	2625	2.07	1.81	2.06	11.5	3.56	7.91	2.35419	9.79121e-07	1.79721e-05	LOC104935503	TMS06036.1	Seipin [Larimichthys crocea]	GO:0019915;GO:0006629;GO:0016021;GO:0005789	lipid storage;lipid metabolic process;integral component of membrane;endoplasmic reticulum membrane	K19365	BSCL2	http://www.genome.jp/dbget-bin/www_bget?ko:K19365	-	-	KOG4200	Uncharacterized conserved protein	sp|Q96G97|BSCL2_HUMAN	Seipin OS=Homo sapiens OX=9606 GN=BSCL2 PE=1 SV=3
gene12947	2876	3.66	4.61	6.92	14.08	28.8	22.57	2.35361	8.41045e-07	1.56792e-05	klhl3	XP_010741230.1;XP_035525046.1;XP_019109156.1;XP_035525045.1	kelch-like protein 3 isoform X1 [Larimichthys crocea];kelch-like protein 3 isoform X4 [Morone saxatilis];kelch-like protein 3 isoform X2 [Larimichthys crocea];kelch-like protein 3 isoform X3 [Morone saxatilis]	GO:0016567;GO:0005856;GO:0005829	protein ubiquitination;cytoskeleton;cytosol	K10443	KLHL2_3	http://www.genome.jp/dbget-bin/www_bget?ko:K10443	-	-	KOG4441	Proteins containing BTB/POZ and Kelch domains, involved in regulatory/signal transduction processes	sp|E7F6F9|KLHL3_DANRE	Kelch-like protein 3 OS=Danio rerio OX=7955 GN=klhl3 PE=3 SV=1
gene2952	2431	5.3	6.28	4.39	25.76	13.47	20.58	2.35348	1.3338e-09	5.26215e-08	LOC104917832	TMS05724.1	Mucosa-associated lymphoid tissue lymphoma translocation protein 1 [Larimichthys crocea]	GO:0004197;GO:0005886;GO:0016021	cysteine-type endopeptidase activity;plasma membrane;integral component of membrane	K07369	MALT1	http://www.genome.jp/dbget-bin/www_bget?ko:K07369	NF-kappa B signaling pathway;Shigellosis;Tuberculosis;B cell receptor signaling pathway;C-type lectin receptor signaling pathway;T cell receptor signaling pathway	ko04064,ko05131,ko05152,ko04662,ko04625,ko04660	-	-	sp|Q9UDY8|MALT1_HUMAN	Mucosa-associated lymphoid tissue lymphoma translocation protein 1 OS=Homo sapiens OX=9606 GN=MALT1 PE=1 SV=1
novel.15897	241	25.08	22.07	27.01	32.14	101.06	118.46	2.35339	0.00909009	0.0390526	-	-	-	-	-	-	-	-	-	-	-	-	-	-
gene8114	1991	1.07	0.69	1.65	4.36	3.66	5.11	2.35239	3.19385e-06	5.02734e-05	aspa	XP_010734805.3	aspartoacylase [Larimichthys crocea]	GO:0046872;GO:0016788;GO:0016811	metal ion binding;hydrolase activity, acting on ester bonds;hydrolase activity, acting on carbon-nitrogen (but not peptide) bonds, in linear amides	K01437	ASPA,aspA	http://www.genome.jp/dbget-bin/www_bget?ko:K01437	Alanine, aspartate and glutamate metabolism;Histidine metabolism	ko00250,ko00340	-	-	sp|A8KB34|ACY2_DANRE	Aspartoacylase OS=Danio rerio OX=7955 GN=aspa PE=2 SV=1
gene10542	2554	2.89	1.89	4.61	8.59	4.96	30.91	2.35151	2.55028e-05	0.000297065	slco2a1	XP_019130926.2	solute carrier organic anion transporter family member 2A1 [Larimichthys crocea]	GO:0055085;GO:0016021;GO:0005886;GO:0006811	transmembrane transport;integral component of membrane;plasma membrane;ion transport	K14345	SLCO2A	http://www.genome.jp/dbget-bin/www_bget?ko:K14345	-	-	-	-	sp|Q00910|SO2A1_RAT	Solute carrier organic anion transporter family member 2A1 OS=Rattus norvegicus OX=10116 GN=Slco2a1 PE=1 SV=3
gene22308	1127	2.23	2.77	2.59	10.79	8.65	7.71	2.35074	1.48555e-06	2.59014e-05	heatr5a	TMS20882.1	HEAT repeat-containing protein 5A [Larimichthys crocea]	-	-	K24814	HEATR5,LAA1	http://www.genome.jp/dbget-bin/www_bget?ko:K24814	-	-	-	-	sp|Q8JFV4|HTR5A_DANRE	HEAT repeat-containing protein 5A OS=Danio rerio OX=7955 GN=heatr5a PE=2 SV=1
gene20109	1235	0.96	0.06	0.5	1.45	1.95	2.18	2.35073	0.00534963	0.0255824	LOC104936283	XP_027146025.1	complement factor H [Larimichthys crocea]	-	-	K04004	CFH,HF1	http://www.genome.jp/dbget-bin/www_bget?ko:K04004	Staphylococcus aureus infection;Complement and coagulation cascades	ko05150,ko04610	KOG4297	C-type lectin	sp|P06909|CFAH_MOUSE	Complement factor H OS=Mus musculus OX=10090 GN=Cfh PE=1 SV=2
novel.6860	1262	0.66	0.22	0.07	1.67	0.58	1.36	2.35013	0.00851749	0.0370747	-	-	-	-	-	-	-	-	-	-	-	-	-	-
novel.5586	599	30.68	10.95	9.52	53.07	33.76	125.68	2.3501	5.60294e-06	8.06615e-05	-	-	-	-	-	-	-	-	-	-	-	-	-	-
gene21864	517	6.38	2.65	4.78	24	8.82	19.86	2.34813	5.41852e-05	0.000559372	LOC104938109	XP_019116228.1	syntaxin-12 [Larimichthys crocea]	GO:0016192;GO:0016021;GO:0005484;GO:0006886	vesicle-mediated transport;integral component of membrane;SNAP receptor activity;intracellular protein transport	K13813	STX12,STX13	http://www.genome.jp/dbget-bin/www_bget?ko:K13813	Phagosome	ko04145	-	-	sp|Q9ER00|STX12_MOUSE	Syntaxin-12 OS=Mus musculus OX=10090 GN=Stx12 PE=1 SV=1
gene12326	2100	7.37	8.13	8.85	37.51	14.25	48.81	2.34688	2.66667e-09	9.70182e-08	LOC104927959	TKS80265.1	Kelch-like protein 40a [Collichthys lucidus]	GO:0048741;GO:0036268;GO:0031674;GO:0031397	skeletal muscle fiber development;swimming;I band;negative regulation of protein ubiquitination	K10473	KBTBD5_10	http://www.genome.jp/dbget-bin/www_bget?ko:K10473	-	-	-	-	sp|B3DIV9|KL40A_DANRE	Kelch-like protein 40a OS=Danio rerio OX=7955 GN=klhl40a PE=2 SV=2
gene919	1116	0.78	0.83	0.57	0.73	1.24	8.41	2.34402	0.00319916	0.0168214	LOC104924550	TMS08430.1	hypothetical protein E3U43_005913 [Larimichthys crocea]	GO:0006955;GO:0005125;GO:0005737;GO:0005615;GO:0007275;GO:0005127;GO:0043524;GO:0070120	immune response;cytokine activity;cytoplasm;extracellular space;multicellular organism development;ciliary neurotrophic factor receptor binding;negative regulation of neuron apoptotic process;ciliary neurotrophic factor-mediated signaling pathway	K05420	CNTF	http://www.genome.jp/dbget-bin/www_bget?ko:K05420	JAK-STAT signaling pathway;Cytokine-cytokine receptor interaction	ko04630,ko04060	-	-	-	-
gene7472	3206	2.31	2.63	2.01	16.72	3.58	6.95	2.34307	4.31423e-05	0.000460532	yod1	TMS19428.1	Ubiquitin thioesterase OTU1 [Larimichthys crocea]	GO:0006986;GO:0005737;GO:0030433;GO:0016579;GO:0004843;GO:0046872	response to unfolded protein;cytoplasm;ubiquitin-dependent ERAD pathway;protein deubiquitination;thiol-dependent deubiquitinase;metal ion binding	K13719	OTU1,YOD1	http://www.genome.jp/dbget-bin/www_bget?ko:K13719	Protein processing in endoplasmic reticulum	ko04141	KOG3288	OTU-like cysteine protease	sp|Q567B1|OTU1_DANRE	Ubiquitin thioesterase OTU1 OS=Danio rerio OX=7955 GN=yod1 PE=2 SV=1
novel.9339	385	50.77	10.95	20.48	18.66	140.47	130.81	2.34098	0.00225683	0.0126936	-	KAE8284952.1	Lysosome membrane protein 2 85 kDa lysosomal membrane sialoglycoprotein [Larimichthys crocea]	GO:0005764;GO:0016021;GO:0005044	lysosome;integral component of membrane;scavenger receptor activity	K12384	SCARB2,LIMP2,CD36L2	http://www.genome.jp/dbget-bin/www_bget?ko:K12384	Lysosome	ko04142	-	-	-	-
novel.8590	264	137.7	2.88	269.78	552.64	275.94	794.75	2.3407	0.0116	0.0475123	-	-	-	-	-	-	-	-	-	-	-	-	-	-
gene1060	1703	295.51	178.84	322.69	1369.1	672.03	953.3	2.33985	3.08012e-07	6.60148e-06	tcap	XP_010738309.1	telethonin [Larimichthys crocea]	GO:0030018;GO:0033292;GO:0060047	Z disc;T-tubule organization;heart contraction	K19879	TCAP	http://www.genome.jp/dbget-bin/www_bget?ko:K19879	-	-	-	-	sp|Q6T8D8|TELT_BOVIN	Telethonin OS=Bos taurus OX=9913 GN=TCAP PE=2 SV=1
gene8975	2286	1.68	3.31	4.67	11.3	14.05	8.15	2.33395	6.86565e-05	0.000686178	nudt4	XP_010735994.1	diphosphoinositol polyphosphate phosphohydrolase 3-beta isoform X1 [Larimichthys crocea]	GO:0016787	hydrolase activity	K07766	E3.6.1.52	http://www.genome.jp/dbget-bin/www_bget?ko:K07766	-	-	KOG2839	Diadenosine and diphosphoinositol polyphosphate phosphohydrolase	sp|A0A024RBG1|NUD4B_HUMAN	Diphosphoinositol polyphosphate phosphohydrolase NUDT4B OS=Homo sapiens OX=9606 GN=NUDT4B PE=3 SV=1
novel.20315	414	2.98	6.47	3.38	14.37	13.75	18.84	2.33329	0.00010401	0.000969143	-	-	-	-	-	-	-	-	-	-	-	-	-	-
gene3015	1924	2.59	3.65	2.74	14.09	9.67	16.47	2.33169	3.20562e-11	1.79689e-09	LOC104917909	XP_019118743.1;XP_019118742.1	alcohol dehydrogenase class-3 isoform X2 [Larimichthys crocea];alcohol dehydrogenase class-3 isoform X1 [Larimichthys crocea]	GO:0016491;GO:0008270	oxidoreductase activity;zinc ion binding	K00121	frmA,ADH5,adhC	http://www.genome.jp/dbget-bin/www_bget?ko:K00121	Alcoholic liver disease;Tyrosine metabolism;Glycolysis / Gluconeogenesis;Pyruvate metabolism;Fatty acid degradation;Retinol metabolism;Drug metabolism - cytochrome P450;Metabolism of xenobiotics by cytochrome P450	ko04936,ko00350,ko00010,ko00620,ko00071,ko00830,ko00982,ko00980	KOG0022	Alcohol dehydrogenase, class III	sp|O19053|ADHX_RABIT;sp|P80467|ADHX_SAAHA	Alcohol dehydrogenase class-3 OS=Oryctolagus cuniculus OX=9986 GN=ADH5 PE=2 SV=3;Alcohol dehydrogenase class-3 OS=Saara hardwickii OX=40250 PE=1 SV=1
gene9887	3185	3.28	1.55	3.21	10.63	10.58	6.52	2.33098	2.22963e-05	0.0002652	rnd3	XP_010737238.1	rho-related GTP-binding protein RhoE [Larimichthys crocea]	GO:0003924;GO:0005525;GO:0007264	GTPase activity;GTP binding;small GTPase mediated signal transduction	K07859	RND3	http://www.genome.jp/dbget-bin/www_bget?ko:K07859	-	-	KOG0393	Ras-related small GTPase, Rho type	sp|P61587|RND3_HUMAN	Rho-related GTP-binding protein RhoE OS=Homo sapiens OX=9606 GN=RND3 PE=1 SV=1
gene14561	3764	10.04	16.6	22.88	68.82	56.98	51.27	2.32733	3.44569e-06	5.36246e-05	usp25	XP_010743374.2;XP_010743375.2;XP_010743377.2;XP_010743376.2;XP_019110581.1	ubiquitin carboxyl-terminal hydrolase 25 isoform X1 [Larimichthys crocea];ubiquitin carboxyl-terminal hydrolase 25 isoform X2 [Larimichthys crocea];ubiquitin carboxyl-terminal hydrolase 25 isoform X5 [Larimichthys crocea];ubiquitin carboxyl-terminal hydrolase 25 isoform X3 [Larimichthys crocea];ubiquitin carboxyl-terminal hydrolase 25 isoform X4 [Larimichthys crocea]	GO:0016579;GO:0006511;GO:0009953;GO:0004843;GO:1904888	protein deubiquitination;ubiquitin-dependent protein catabolic process;dorsal/ventral pattern formation;thiol-dependent deubiquitinase;cranial skeletal system development	K11849	USP25	http://www.genome.jp/dbget-bin/www_bget?ko:K11849	IL-17 signaling pathway	ko04657	KOG1863	Ubiquitin carboxyl-terminal hydrolase	sp|Q9UHP3|UBP25_HUMAN	Ubiquitin carboxyl-terminal hydrolase 25 OS=Homo sapiens OX=9606 GN=USP25 PE=1 SV=4
novel.5403	849	16.63	6.26	5.27	32.85	38.14	21.17	2.32584	0.000106257	0.000985259	-	-	-	-	-	-	-	-	-	-	-	-	-	-
gene16964	373	95.28	174.3	170.12	520.78	540.12	453.74	2.32397	7.52538e-07	1.43202e-05	LOC104932912	XP_019127143.1	thioredoxin [Larimichthys crocea]	GO:0006662;GO:0015035	glycerol ether metabolic process;protein-disulfide reductase activity	K03671	trxA	http://www.genome.jp/dbget-bin/www_bget?ko:K03671	Fluid shear stress and atherosclerosis;Salmonella infection;Parkinson disease;NOD-like receptor signaling pathway	ko05418,ko05132,ko05012,ko04621	KOG0907	Thioredoxin	sp|Q9DGI3|THIO_ICTPU	Thioredoxin OS=Ictalurus punctatus OX=7998 GN=txn PE=3 SV=1
gene6238	2263	0.98	0.05	0.69	1.4	1.74	3.91	2.32187	0.0030254	0.0160925	pgf	TMS21322.1	Placenta growth factor [Larimichthys crocea]	GO:0008083;GO:0016021;GO:0016020	growth factor activity;integral component of membrane;membrane	K16859	PGF	http://www.genome.jp/dbget-bin/www_bget?ko:K16859	Focal adhesion;MAPK signaling pathway;PI3K-Akt signaling pathway;Rap1 signaling pathway;Ras signaling pathway;Pathways in cancer	ko04510,ko04010,ko04151,ko04015,ko04014,ko05200	-	-	sp|P49763|PLGF_HUMAN	Placenta growth factor OS=Homo sapiens OX=9606 GN=PGF PE=1 SV=2
gene21705	2709	1.88	3.49	2.85	8.79	8.74	12.09	2.32023	1.10348e-09	4.45274e-08	LOC104937950	XP_020498903.1	ras-related protein Rab-14-like [Labrus bergylta]	GO:0005829;GO:0003924;GO:0006895;GO:0055037;GO:0031901;GO:0032456;GO:0005802;GO:0005525;GO:0000139;GO:0042742;GO:0090382;GO:0045335	cytosol;GTPase activity;Golgi to endosome transport;recycling endosome;early endosome membrane;endocytic recycling;trans-Golgi network;GTP binding;Golgi membrane;defense response to bacterium;phagosome maturation;phagocytic vesicle	K07881	RAB14	http://www.genome.jp/dbget-bin/www_bget?ko:K07881	AMPK signaling pathway	ko04152	KOG0098	GTPase Rab2, small G protein superfamily	sp|Q5ZKU5|RAB14_CHICK	Ras-related protein Rab-14 OS=Gallus gallus OX=9031 GN=RAB14 PE=2 SV=3
gene11255	1139	174.69	56.22	41.62	175.88	320.81	525.7	2.32019	4.17027e-05	0.000447478	LOC104926791	KAE8290349.1	Complement factor D [Larimichthys crocea]	GO:0005615;GO:0006957;GO:0004252;GO:0007219	extracellular space;complement activation, alternative pathway;serine-type endopeptidase activity;Notch signaling pathway	K01334	CFD	http://www.genome.jp/dbget-bin/www_bget?ko:K01334	Staphylococcus aureus infection;Coronavirus disease - COVID-19;Complement and coagulation cascades	ko05150,ko05171,ko04610	-	-	sp|P51779|CFAD_PIG	Complement factor D OS=Sus scrofa OX=9823 GN=CFD PE=2 SV=1
novel.3529	558	6.28	3.09	0	15.57	4.41	13.82	2.31993	0.011169	0.046105	-	-	-	-	-	-	-	-	-	-	-	-	-	-
gene10174	2657	9.06	6.95	23.37	37.38	49.48	69.52	2.31967	3.80622e-05	0.000414518	LOC104925636	TKS75965.1	Protein SOGA3 [Collichthys lucidus]	GO:0010506;GO:0005615	regulation of autophagy;extracellular space	-	-	-	-	-	-	-	sp|Q6ZU52|K0408_HUMAN	Uncharacterized protein KIAA0408 OS=Homo sapiens OX=9606 GN=KIAA0408 PE=1 SV=1
gene9928	2510	5.02	13.22	19.93	20.21	84.53	12.1	2.3181	0.00416944	0.0209326	LOC104925383	XP_010737292.3	nuclear factor 7, brain [Larimichthys crocea]	GO:0008270	zinc ion binding	K12012	TRIM35	http://www.genome.jp/dbget-bin/www_bget?ko:K12012	-	-	-	-	sp|Q60714|S27A1_MOUSE;sp|Q02084|A33_PLEWA	Long-chain fatty acid transport protein 1 OS=Mus musculus OX=10090 GN=Slc27a1 PE=1 SV=1;Zinc-binding protein A33 OS=Pleurodeles waltl OX=8319 PE=1 SV=2
gene5948	3336	3.6	1.65	5.1	10.19	8.74	24.68	2.31467	4.03068e-06	6.11376e-05	LOC104921072	TMS07930.1	Ras-GEF domain-containing family member 1B-A [Larimichthys crocea]	GO:0007264;GO:0005085	small GTPase mediated signal transduction;guanyl-nucleotide exchange factor activity	-	-	-	-	-	KOG3541	Predicted guanine nucleotide exchange factor	sp|Q6DBW1|RG1BB_DANRE	Ras-GEF domain-containing family member 1B-B OS=Danio rerio OX=7955 GN=rasgef1bb PE=2 SV=1
gene9634	2015	22.92	11.36	13.37	29.6	22.17	170.31	2.3131	5.178e-05	0.000537593	LOC104925065	KAE8283238.1	Suppressor of cytokine signaling 3 [Larimichthys crocea]	GO:0031099;GO:0060042;GO:0035677;GO:0009968;GO:0040008;GO:0043066;GO:0008283;GO:0048681;GO:0016567;GO:0007259;GO:0035556;GO:0070365	regeneration;retina morphogenesis in camera-type eye;posterior lateral line neuromast hair cell development;negative regulation of signal transduction;regulation of growth;negative regulation of apoptotic process;cell population proliferation;negative regulation of axon regeneration;protein ubiquitination;receptor signaling pathway via JAK-STAT;intracellular signal transduction;hepatocyte differe…	K04696	SOCS3,CIS3	http://www.genome.jp/dbget-bin/www_bget?ko:K04696	JAK-STAT signaling pathway;TNF signaling pathway;Ubiquitin mediated proteolysis;Insulin resistance;Non-alcoholic fatty liver disease;Type II diabetes mellitus;Hepatitis C;Herpes simplex virus 1 infection;Influenza A;Osteoclast differentiation;Adipocytokine signaling pathway;Growth hormone synthesis, secretion and action;Insulin signaling pathway;Prolactin signaling pathway	ko04630,ko04668,ko04120,ko04931,ko04932,ko04930,ko05160,ko05168,ko05164,ko04380,ko04920,ko04935,ko04910,ko04917	-	-	sp|Q90X67|SOCS3_CHICK	Suppressor of cytokine signaling 3 OS=Gallus gallus OX=9031 GN=SOCS3 PE=2 SV=1
gene15463	4799	0.18	0.2	0.26	0.14	0.67	1.99	2.31085	0.00223643	0.0126074	LOC104931304	XP_010744581.1	inhibin beta B chain [Larimichthys crocea]	GO:0008083;GO:0005576;GO:0005179	growth factor activity;extracellular region;hormone activity	K22687	INHBB	http://www.genome.jp/dbget-bin/www_bget?ko:K22687	Signaling pathways regulating pluripotency of stem cells;TGF-beta signaling pathway;Cytokine-cytokine receptor interaction	ko04550,ko04350,ko04060	-	-	sp|P27093|INHBB_CHICK	Inhibin beta B chain OS=Gallus gallus OX=9031 GN=INHBB PE=2 SV=2
gene5131	3216	54.49	54.79	69.41	261.5	160.4	193.26	2.31054	1.5944e-08	4.77664e-07	ptp4a3	KAE8288584.1	Protein tyrosine phosphatase type IVA 3 [Larimichthys crocea]	GO:0016791	phosphatase activity	K18041	PTP4A	http://www.genome.jp/dbget-bin/www_bget?ko:K18041	-	-	-	-	sp|A2VDT1|TP4A3_BOVIN	Protein tyrosine phosphatase type IVA 3 OS=Bos taurus OX=9913 GN=PTP4A3 PE=2 SV=1
gene7974	2949	2.16	4.13	1.95	17.11	3.84	11.99	2.30977	8.14513e-06	0.000111679	enthd2	KAE8284401.1	AP-4 complex accessory subunit Tepsin [Larimichthys crocea]	GO:0005794;GO:0031410	Golgi apparatus;cytoplasmic vesicle	-	-	-	-	-	-	-	sp|G3V8Y7|AP4AT_RAT	AP-4 complex accessory subunit Tepsin OS=Rattus norvegicus OX=10116 GN=Tepsin PE=1 SV=1
gene19630	11423	6.67	9.22	11.22	28.61	38.47	36.35	2.30892	2.96564e-07	6.406e-06	herc1	XP_027137276.1;XP_027137275.1;XP_027137277.1	probable E3 ubiquitin-protein ligase HERC1 isoform X4 [Larimichthys crocea];probable E3 ubiquitin-protein ligase HERC1 isoform X3 [Larimichthys crocea];probable E3 ubiquitin-protein ligase HERC1 isoform X5 [Larimichthys crocea]	GO:0004842	ubiquitin-protein transferase activity	K10594	HERC1	http://www.genome.jp/dbget-bin/www_bget?ko:K10594	Ubiquitin mediated proteolysis	ko04120	KOG1426	FOG: RCC1 domain	sp|Q15751|HERC1_HUMAN	Probable E3 ubiquitin-protein ligase HERC1 OS=Homo sapiens OX=9606 GN=HERC1 PE=1 SV=2
gene4006	964	10.67	17.05	11.28	55.76	28.52	63.81	2.30871	5.02019e-10	2.20142e-08	psmg1	XP_010729159.2	proteasome assembly chaperone 1 [Larimichthys crocea]	GO:0043248;GO:0000502;GO:0005783	proteasome assembly;proteasome complex;endoplasmic reticulum	K11875	PSMG1,DSCR2,PAC1	http://www.genome.jp/dbget-bin/www_bget?ko:K11875	-	-	-	-	sp|Q6DG91|PSMG1_DANRE	Proteasome assembly chaperone 1 OS=Danio rerio OX=7955 GN=psmg1 PE=2 SV=1
gene22169	1809	0.51	0.25	1.19	1.08	3.62	1.33	2.30871	0.00610516	0.0284219	LOC104938421	XP_027137056.1;XP_027137057.1	stathmin-4-like isoform X1 [Larimichthys crocea];stathmin-4-like isoform X2 [Larimichthys crocea]	GO:0031110	regulation of microtubule polymerization or depolymerization	-	-	-	-	-	-	-	sp|Q9H169|STMN4_HUMAN	Stathmin-4 OS=Homo sapiens OX=9606 GN=STMN4 PE=1 SV=1
gene20402	1273	41.99	57.73	137.84	267.74	388.58	126.35	2.30801	0.000778695	0.00526267	ankrd9	XP_019111528.2	ankyrin repeat domain-containing protein 9 [Larimichthys crocea]	-	-	K25208	ANKRD9	http://www.genome.jp/dbget-bin/www_bget?ko:K25208	-	-	-	-	sp|Q96BM1|ANKR9_HUMAN	Ankyrin repeat domain-containing protein 9 OS=Homo sapiens OX=9606 GN=ANKRD9 PE=1 SV=1
novel.15282	818	2.18	2.57	0.25	6.39	3.37	9.29	2.30746	0.000628655	0.00438707	-	-	-	-	-	-	-	-	-	-	-	-	-	-
novel.7189	390	18.34	7.43	1.18	29.46	9.65	67.78	2.30704	0.00397201	0.0201043	-	-	-	-	-	-	-	-	-	-	-	-	-	-
gene5400	3706	9.68	13.13	12.77	72.84	27.62	42.95	2.3037	2.03187e-07	4.60162e-06	ddi2	XP_010731075.1;XP_010731076.1	protein DDI1 homolog 2 isoform X1 [Larimichthys crocea];protein DDI1 homolog 2 isoform X2 [Larimichthys crocea]	GO:0004190	aspartic-type endopeptidase activity	K11885	DDI1	http://www.genome.jp/dbget-bin/www_bget?ko:K11885	-	-	KOG0012	DNA damage inducible protein	sp|Q6TH22|DDI2_DANRE	Protein DDI1 homolog 2 OS=Danio rerio OX=7955 GN=ddi2 PE=2 SV=1
gene22098	1744	19	17.37	16.39	67.75	56.28	63.05	2.30337	3.38291e-10	1.52947e-08	oser1	XP_019110832.2	oxidative stress-responsive serine-rich protein 1 [Larimichthys crocea]	-	-	-	-	-	-	-	-	-	sp|Q9NX31|OSER1_HUMAN	Oxidative stress-responsive serine-rich protein 1 OS=Homo sapiens OX=9606 GN=OSER1 PE=1 SV=2
gene19971	1193	3.12	4.11	3.27	13.6	9.58	15.83	2.30301	8.02619e-10	3.35341e-08	ctu1	XP_010750406.1	cytoplasmic tRNA 2-thiolation protein 1 [Larimichthys crocea]	GO:0005737;GO:0016779;GO:0034227;GO:0032447;GO:0002098;GO:0000049	cytoplasm;nucleotidyltransferase activity;tRNA thio-modification;protein urmylation;tRNA wobble uridine modification;tRNA binding	K14168	CTU1,NCS6	http://www.genome.jp/dbget-bin/www_bget?ko:K14168	Sulfur relay system	ko04122	KOG2840	Uncharacterized conserved protein with similarity to predicted ATPase of the PP-loop superfamily	sp|Q803X1|CTU1_DANRE	Cytoplasmic tRNA 2-thiolation protein 1 OS=Danio rerio OX=7955 GN=ctu1 PE=2 SV=1
gene18203	3800	0.86	0.69	0.64	4.2	3.07	4.84	2.30268	7.40857e-07	1.41523e-05	LOC104934232	XP_019121292.2	solute carrier family 22 member 2 [Larimichthys crocea]	GO:0016021;GO:0022857	integral component of membrane;transmembrane transporter activity	K08199	SLC22A2,OCT2	http://www.genome.jp/dbget-bin/www_bget?ko:K08199	Choline metabolism in cancer	ko05231	KOG0255	Synaptic vesicle transporter SVOP and related transporters (major facilitator superfamily)	sp|Q8MJI6|S22A2_RABIT	Solute carrier family 22 member 2 OS=Oryctolagus cuniculus OX=9986 GN=SLC22A2 PE=1 SV=1
gene19742	727	58.36	81.81	33.86	170.62	264.01	89.92	2.2973	0.000109943	0.00101375	LOC104935885	XP_027141082.1;CAF95623.1;AWP19515.1	nuclear protein 1 [Larimichthys crocea];unnamed protein product [Tetraodon nigroviridis];putative nuclear protein 1-like [Scophthalmus maximus]	-	-	K15626	NUPR1,COM1	http://www.genome.jp/dbget-bin/www_bget?ko:K15626	Transcriptional misregulation in cancer	ko05202	-	-	sp|O54842|NUPR1_RAT;sp|O60356|NUPR1_HUMAN	Nuclear protein 1 OS=Rattus norvegicus OX=10116 GN=Nupr1 PE=2 SV=1;Nuclear protein 1 OS=Homo sapiens OX=9606 GN=NUPR1 PE=1 SV=1
gene17983	5796	0.2	0.13	0.05	0.38	0.41	0.61	2.29704	0.000183731	0.00155948	LOC104933983	XP_030591647.1;XP_010747839.3	myosin-1B-like isoform X1 [Archocentrus centrarchus];myosin heavy chain, skeletal muscle, adult [Larimichthys crocea]	GO:0051015;GO:0005524;GO:0003774;GO:0016459	actin filament binding;ATP binding;cytoskeletal motor activity;myosin complex	K24220	MYH1s	http://www.genome.jp/dbget-bin/www_bget?ko:K24220	-	-	-	-	sp|Q076A3|MYH13_CANLF	Myosin-13 OS=Canis lupus familiaris OX=9615 GN=MYH13 PE=3 SV=1
gene20305	1725	2.25	2.89	0.95	1.85	5.41	18.34	2.29652	0.000447005	0.00330006	LOC104936488	XP_027147213.1	purine nucleoside phosphorylase [Larimichthys crocea]	GO:0009116;GO:0004731;GO:0047975	nucleoside metabolic process;purine-nucleoside phosphorylase activity;guanosine phosphorylase activity	K03783	punA,PNP	http://www.genome.jp/dbget-bin/www_bget?ko:K03783	Nicotinate and nicotinamide metabolism;Purine metabolism;Pyrimidine metabolism	ko00760,ko00230,ko00240	KOG3984	Purine nucleoside phosphorylase	sp|P55859|PNPH_BOVIN	Purine nucleoside phosphorylase OS=Bos taurus OX=9913 GN=PNP PE=1 SV=3
novel.12342	472	3.31	3.39	2.59	19.98	0.85	11.87	2.29605	0.0117188	0.0478565	TBC1D15	XP_010753848.3	TBC1 domain family member 17 [Larimichthys crocea]	-	-	K19945	TBC1D17	http://www.genome.jp/dbget-bin/www_bget?ko:K19945	Mitophagy - animal	ko04137	KOG2197	Ypt/Rab-specific GTPase-activating protein GYP7 and related proteins	sp|Q8TC07|TBC15_HUMAN	TBC1 domain family member 15 OS=Homo sapiens OX=9606 GN=TBC1D15 PE=1 SV=2
gene1355	1378	27.2	29.75	35.17	179.23	49.1	116.61	2.29296	2.41284e-06	3.94591e-05	bnip3	XP_019110625.1	BCL2/adenovirus E1B 19 kDa protein-interacting protein 3 isoform X1 [Larimichthys crocea]	GO:0005740;GO:0043065;GO:0016021	mitochondrial envelope;positive regulation of apoptotic process;integral component of membrane	K15464	BNIP3	http://www.genome.jp/dbget-bin/www_bget?ko:K15464	Autophagy - animal;Mitophagy - animal;FoxO signaling pathway;Legionellosis;Shigellosis	ko04140,ko04137,ko04068,ko05134,ko05131	-	-	sp|O55003|BNIP3_MOUSE	BCL2/adenovirus E1B 19 kDa protein-interacting protein 3 OS=Mus musculus OX=10090 GN=Bnip3 PE=1 SV=1
gene7852	2452	0.43	0.05	0.67	0.92	0.84	3.24	2.29206	0.004285	0.0213836	mak	XP_027130276.1;XP_027130273.1;XP_027130280.1	serine/threonine-protein kinase MAK isoform X5 [Larimichthys crocea];serine/threonine-protein kinase MAK isoform X2 [Larimichthys crocea];serine/threonine-protein kinase MAK isoform X9 [Larimichthys crocea]	GO:0004672;GO:0005524	protein kinase activity;ATP binding	K08829	MAK	http://www.genome.jp/dbget-bin/www_bget?ko:K08829	-	-	KOG0661	MAPK related serine/threonine protein kinase	sp|P20794|MAK_HUMAN	Serine/threonine-protein kinase MAK OS=Homo sapiens OX=9606 GN=MAK PE=1 SV=2
gene19400	2183	5.65	8.48	4.34	26.31	12.07	31.68	2.29135	2.73014e-09	9.91819e-08	LOC104935519	XP_010749673.1	Na(+)/H(+) exchange regulatory cofactor NHE-RF1 [Larimichthys crocea]	GO:0012505;GO:0030175;GO:0016020;GO:0060090;GO:0005902;GO:0001726	endomembrane system;filopodium;membrane;molecular adaptor activity;microvillus;ruffle	K13365	SLC9A3R1,NHERF1	http://www.genome.jp/dbget-bin/www_bget?ko:K13365	Tight junction;Pathogenic Escherichia coli infection;Human papillomavirus infection;Parathyroid hormone synthesis, secretion and action	ko04530,ko05130,ko05165,ko04928	KOG3528	FOG: PDZ domain	sp|Q9JJ19|NHRF1_RAT	Na(+)/H(+) exchange regulatory cofactor NHE-RF1 OS=Rattus norvegicus OX=10116 GN=Slc9a3r1 PE=1 SV=3
gene3047	1773	7.56	10.36	6.13	35.5	13.62	43.71	2.28891	7.44521e-09	2.4595e-07	zpr1	XP_010727831.3	zinc finger protein ZPR1 [Larimichthys crocea]	GO:0008270	zinc ion binding	K06874	K06874	http://www.genome.jp/dbget-bin/www_bget?ko:K06874	-	-	KOG2703	C4-type Zn-finger protein	sp|Q62384|ZPR1_MOUSE	Zinc finger protein ZPR1 OS=Mus musculus OX=10090 GN=Zpr1 PE=1 SV=1
gene4748	3612	8.81	6.37	9.67	29.7	25.47	35.93	2.28554	8.91869e-10	3.6767e-08	whamm	XP_010730160.3	WASP homolog-associated protein with actin, membranes and microtubules [Larimichthys crocea]	GO:0003779	actin binding	K20479	WHAMM	http://www.genome.jp/dbget-bin/www_bget?ko:K20479	Tight junction	ko04530	-	-	sp|Q571B6|WHAMM_MOUSE	WASP homolog-associated protein with actin, membranes and microtubules OS=Mus musculus OX=10090 GN=Whamm PE=1 SV=2
novel.6241	2639	1.86	2.61	1.52	3.94	10.67	3.6	2.28523	0.00038996	0.00293935	-	KAE8285908.1	Catenin delta-1 Cadherin-associated Src substrate [Larimichthys crocea]	GO:0032968;GO:0030054;GO:0016021;GO:0045296;GO:0098609	positive regulation of transcription elongation from RNA polymerase II promoter;cell junction;integral component of membrane;cadherin binding;cell-cell adhesion	-	-	-	-	-	-	-	-	-
gene3189	2544	11.64	16.28	13.94	58.83	29.19	69.92	2.28386	2.47414e-11	1.42225e-09	fkbp4	KAE8296352.1	Peptidyl-prolyl cis-trans isomerase FKBP4 [Larimichthys crocea]	GO:0003755;GO:0016021;GO:0005739;GO:0032580;GO:0005829;GO:0005874;GO:0008376	peptidyl-prolyl cis-trans isomerase activity;integral component of membrane;mitochondrion;Golgi cisterna membrane;cytosol;microtubule;acetylgalactosaminyltransferase activity	K09571	FKBP4_5	http://www.genome.jp/dbget-bin/www_bget?ko:K09571	Estrogen signaling pathway	ko04915	KOG0543	FKBP-type peptidyl-prolyl cis-trans isomerase	sp|P27124|FKBP4_RABIT;sp|Q02790|FKBP4_HUMAN	Peptidyl-prolyl cis-trans isomerase FKBP4 OS=Oryctolagus cuniculus OX=9986 GN=FKBP4 PE=1 SV=3;Peptidyl-prolyl cis-trans isomerase FKBP4 OS=Homo sapiens OX=9606 GN=FKBP4 PE=1 SV=3
gene7799	3124	6.18	5.29	4.48	17.53	10.87	19.02	2.28341	4.85153e-11	2.58498e-09	slc15a4	XP_027134013.1;TMS03384.1	solute carrier family 15 member 4 [Larimichthys crocea];Solute carrier family 15 member 4 [Larimichthys crocea]	GO:0016021;GO:0015293;GO:0006857	integral component of membrane;symporter activity;oligopeptide transport	K14638	SLC15A3_4,PHT	http://www.genome.jp/dbget-bin/www_bget?ko:K14638	-	-	-	-	sp|O09014|S15A4_RAT	Solute carrier family 15 member 4 OS=Rattus norvegicus OX=10116 GN=Slc15a4 PE=1 SV=1
gene13985	2115	0.81	2.16	2.93	7.55	7.54	4.77	2.27797	0.000228954	0.00187152	lins	XP_027137689.1	protein Lines homolog 1 isoform X1 [Larimichthys crocea]	GO:0006665;GO:0003677;GO:0005789;GO:0007275;GO:0016740;GO:0005634;GO:0016021	sphingolipid metabolic process;DNA binding;endoplasmic reticulum membrane;multicellular organism development;transferase activity;nucleus;integral component of membrane	K22533	LINS1	http://www.genome.jp/dbget-bin/www_bget?ko:K22533	-	-	-	-	sp|Q8NG48|LINES_HUMAN	Protein Lines homolog 1 OS=Homo sapiens OX=9606 GN=LINS1 PE=2 SV=2
gene17591	1670	5.11	1.96	1.8	7.21	6.33	20.14	2.27697	7.70344e-06	0.000106626	LOC104933554	XP_027139271.1;TMS23462.1	beta-2-glycoprotein 1 [Larimichthys crocea];Beta-2-glycoprotein 1 [Larimichthys crocea]	GO:0008201;GO:0005576	heparin binding;extracellular region	K17305	APOH,B2G1	http://www.genome.jp/dbget-bin/www_bget?ko:K17305	Cholesterol metabolism	ko04979	KOG4297	C-type lectin	sp|P17690|APOH_BOVIN	Beta-2-glycoprotein 1 OS=Bos taurus OX=9913 GN=APOH PE=1 SV=4
gene19194	937	1.97	4.54	4.47	8.51	11.05	23	2.2758	4.66383e-06	6.89446e-05	LOC104935292	KAE8288248.1	hypothetical protein D5F01_LYC14310 [Larimichthys crocea]	GO:0016021	integral component of membrane	-	-	-	-	-	-	-	sp|P59383|LRRN4_MOUSE	Leucine-rich repeat neuronal protein 4 OS=Mus musculus OX=10090 GN=Lrrn4 PE=1 SV=2
gene1600	971	5.38	5.09	4.01	9.19	15.14	34.23	2.27481	2.76235e-07	6.00877e-06	ebp	XP_027144325.1;KAF6716068.1	3-beta-hydroxysteroid-Delta(8),Delta(7)-isomerase [Larimichthys crocea];3-beta-hydroxysteroid-Delta(8),Delta(7)-isomerase [Oryzias melastigma]	GO:0047750;GO:0005789;GO:0016125;GO:0016021	cholestenol delta-isomerase activity;endoplasmic reticulum membrane;sterol metabolic process;integral component of membrane	K01824	EBP	http://www.genome.jp/dbget-bin/www_bget?ko:K01824	Steroid biosynthesis	ko00100	-	-	sp|Q15125|EBP_HUMAN	3-beta-hydroxysteroid-Delta(8),Delta(7)-isomerase OS=Homo sapiens OX=9606 GN=EBP PE=1 SV=3
gene3119	6095	1.85	0.99	1.15	3.92	3.55	7.99	2.27435	3.72091e-09	1.30765e-07	sik2	XP_027135730.1	serine/threonine-protein kinase SIK2 [Larimichthys crocea]	GO:0005524;GO:0106311;GO:0106310	ATP binding;protein serine/threonine kinase activity;protein serine kinase activity	K16311	SIK2	http://www.genome.jp/dbget-bin/www_bget?ko:K16311	Glucagon signaling pathway	ko04922	-	-	sp|Q8CFH6|SIK2_MOUSE	Serine/threonine-protein kinase SIK2 OS=Mus musculus OX=10090 GN=Sik2 PE=1 SV=1
gene12798	1835	2.09	4.17	4.25	12.24	10.7	15.19	2.27311	1.9638e-07	4.46378e-06	LOC104928473	TMS22556.1	Pleckstrin homology domain-containing family M member 1 [Larimichthys crocea]	GO:0005764;GO:0005768;GO:0006914	lysosome;endosome;autophagy	K23282	PLEKHM1	http://www.genome.jp/dbget-bin/www_bget?ko:K23282	Salmonella infection	ko05132	KOG4381	RUN domain-containing protein	sp|Q9Y4G2|PKHM1_HUMAN	Pleckstrin homology domain-containing family M member 1 OS=Homo sapiens OX=9606 GN=PLEKHM1 PE=1 SV=3
gene8628	3228	3.78	2.09	2.95	11.02	13.15	10.12	2.27213	3.22492e-06	5.06983e-05	dok7	KAE8279076.1	Protein Dok-7 Downstream of tyrosine kinase 7 [Larimichthys crocea]	GO:0016301;GO:0061098;GO:0019901	kinase activity;positive regulation of protein tyrosine kinase activity;protein kinase binding	K24038	DOK7	http://www.genome.jp/dbget-bin/www_bget?ko:K24038	-	-	-	-	sp|Q18PD9|DOK7_TAKRU	Protein Dok-7 OS=Takifugu rubripes OX=31033 GN=dok7 PE=2 SV=1
gene19731	759	6.62	11.18	14.75	42.22	24.28	58.79	2.27175	3.43408e-07	7.25961e-06	LOC104935873	XP_010750083.1	GSK-3-binding protein [Larimichthys crocea]	-	-	K03096	FRAT2	http://www.genome.jp/dbget-bin/www_bget?ko:K03096	Wnt signaling pathway;Pathways in cancer;Breast cancer;Gastric cancer;Hepatocellular carcinoma;Alzheimer disease;Pathways of neurodegeneration - multiple diseases	ko04310,ko05200,ko05224,ko05226,ko05225,ko05010,ko05022	-	-	sp|O93343|GBP_XENLA	GSK-3-binding protein OS=Xenopus laevis OX=8355 GN=gbp PE=1 SV=1
gene12426	2402	1.56	2.35	1.14	8.23	3.57	6.02	2.27141	1.42128e-06	2.49918e-05	LOC104928064	XP_010740583.2	zinc finger and BTB domain-containing protein 20 [Larimichthys crocea]	-	-	K10502	ZBTB22,BING1	http://www.genome.jp/dbget-bin/www_bget?ko:K10502	-	-	-	-	sp|Q9Z0G7|ZBT22_MOUSE	Zinc finger and BTB domain-containing protein 22 OS=Mus musculus OX=10090 GN=Zbtb22 PE=2 SV=1
gene18498	2768	2.73	3.54	4.49	9.97	8.17	25.75	2.27104	2.3167e-08	6.65876e-07	abcb6	XP_010748528.3	ATP-binding cassette sub-family B member 6, mitochondrial [Larimichthys crocea]	GO:0016021;GO:0005524;GO:0042626	integral component of membrane;ATP binding;ATPase-coupled transmembrane transporter activity	K05661	ABCB6	http://www.genome.jp/dbget-bin/www_bget?ko:K05661	ABC transporters	ko02010	KOG0056	Heavy metal exporter HMT1, ABC superfamily	sp|Q08D64|ABCB6_XENTR	ATP-binding cassette sub-family B member 6 OS=Xenopus tropicalis OX=8364 GN=abcb6 PE=2 SV=1
gene9637	1492	2.82	3.31	3.63	3.09	8.04	31.05	2.26226	0.000223387	0.00183692	LOC104925068	XP_010736907.1	metalloproteinase inhibitor 2 [Larimichthys crocea]	GO:0004857;GO:0005576;GO:0008191;GO:0046872	enzyme inhibitor activity;extracellular region;metalloendopeptidase inhibitor activity;metal ion binding	K22583	TIMP2	http://www.genome.jp/dbget-bin/www_bget?ko:K22583	-	-	KOG4745	Metalloproteinase inhibitor TIMP and related proteins	sp|Q9WUC6|TIMP2_CAVPO	Metalloproteinase inhibitor 2 OS=Cavia porcellus OX=10141 GN=TIMP2 PE=2 SV=1
gene486	2282	26.78	29.4	23.57	85.26	69.6	142.41	2.26208	3.25775e-17	6.5092e-15	dnaja2	XP_010730226.1	dnaJ homolog subfamily A member 2 [Larimichthys crocea]	GO:0006457;GO:0009408;GO:0005524;GO:0051082;GO:0030544;GO:0046872	protein folding;response to heat;ATP binding;unfolded protein binding;Hsp70 protein binding;metal ion binding	K09503	DNAJA2	http://www.genome.jp/dbget-bin/www_bget?ko:K09503	Protein processing in endoplasmic reticulum	ko04141	KOG0712	Molecular chaperone (DnaJ superfamily)	sp|O60884|DNJA2_HUMAN	DnaJ homolog subfamily A member 2 OS=Homo sapiens OX=9606 GN=DNAJA2 PE=1 SV=1
gene22462	1137	17.74	18.06	18.22	92.52	37.24	60.47	2.25725	2.13565e-07	4.81027e-06	cops8	XP_033473554.1	COP9 signalosome complex subunit 8 [Epinephelus lanceolatus]	GO:0010387;GO:0008180;GO:0005737;GO:0000338	COP9 signalosome assembly;COP9 signalosome;cytoplasm;protein deneddylation	K12181	COPS8,CSN8	http://www.genome.jp/dbget-bin/www_bget?ko:K12181	-	-	-	-	sp|Q7ZUZ0|CSN8_DANRE	COP9 signalosome complex subunit 8 OS=Danio rerio OX=7955 GN=cops8 PE=2 SV=1
gene17887	522	74.43	2.87	31.77	249.24	58.09	58.87	2.25713	0.0114746	0.0471337	LOC104933883	XP_022060291.1;XP_027131274.1	LOW QUALITY PROTEIN: 60S ribosomal protein L22-like 1 [Acanthochromis polyacanthus];60S ribosomal protein L22-like 1 [Larimichthys crocea]	GO:0003723;GO:0005840;GO:0006412;GO:0003735;GO:0060216	RNA binding;ribosome;translation;structural constituent of ribosome;definitive hemopoiesis	K02891	RP-L22e,RPL22	http://www.genome.jp/dbget-bin/www_bget?ko:K02891	Ribosome;Coronavirus disease - COVID-19	ko03010,ko05171	KOG3434	60S ribosomal protein L22	sp|Q5I0R6|RL22L_XENTR	60S ribosomal protein L22-like 1 OS=Xenopus tropicalis OX=8364 GN=rpl22l1 PE=2 SV=1
gene11924	3979	1.68	2.35	1.92	7.42	4.62	10.13	2.2571	1.7232e-11	1.04103e-09	ipo4	KAE8280010.1	Importin-4 [Larimichthys crocea]	GO:0006606;GO:0031267;GO:0005634;GO:0005737	protein import into nucleus;small GTPase binding;nucleus;cytoplasm	K20221	IPO4,RANBP4	http://www.genome.jp/dbget-bin/www_bget?ko:K20221	Nucleocytoplasmic transport	ko03013	KOG2171	Karyopherin (importin) beta 3	sp|Q8TEX9|IPO4_HUMAN	Importin-4 OS=Homo sapiens OX=9606 GN=IPO4 PE=1 SV=2
gene18817	914	1.58	5.54	1.83	15.38	4.09	13.04	2.25394	0.000338986	0.00261317	LOC104934883	TMS11737.1	Multidrug resistance-associated protein 4 [Larimichthys crocea]	GO:0034707;GO:0055038;GO:0016853;GO:0006821;GO:0016324;GO:0005789;GO:0005260;GO:0042626;GO:0005524;GO:0016021;GO:0031901	chloride channel complex;recycling endosome membrane;isomerase activity;chloride transport;apical plasma membrane;endoplasmic reticulum membrane;intracellularly ATP-gated chloride channel activity;ATPase-coupled transmembrane transporter activity;ATP binding;integral component of membrane;early endosome membrane	K05673	ABCC4	http://www.genome.jp/dbget-bin/www_bget?ko:K05673	ABC transporters;cAMP signaling pathway;Antifolate resistance;Bile secretion	ko02010,ko04024,ko01523,ko04976	KOG0054	Multidrug resistance-associated protein/mitoxantrone resistance protein, ABC superfamily	sp|E9Q236|MRP4_MOUSE	ATP-binding cassette sub-family C member 4 OS=Mus musculus OX=10090 GN=Abcc4 PE=1 SV=1
gene672	1379	18.99	5.02	16.57	23.1	61.84	53.81	2.25209	0.00029162	0.00229881	fam195a	XP_010733018.2	MAPK regulated corepressor interacting protein 2 [Larimichthys crocea]	GO:0005634;GO:0010494	nucleus;cytoplasmic stress granule	-	-	-	-	-	-	-	sp|Q0II70|MCRI2_BOVIN	MAPK regulated corepressor interacting protein 2 OS=Bos taurus OX=9913 GN=MCRIP2 PE=2 SV=1
gene10431	3738	13.41	8.56	17.76	100.42	16.18	18.71	2.25081	0.00171034	0.0100918	rhoq	KAA8584061.1;XP_034408415.1	hypothetical protein FQN60_015269, partial [Etheostoma spectabile];rho-related GTP-binding protein RhoQ, partial [Cyclopterus lumpus]	GO:0005525;GO:0007264;GO:0003924	GTP binding;small GTPase mediated signal transduction;GTPase activity	K07194	RHOQ,TC10	http://www.genome.jp/dbget-bin/www_bget?ko:K07194	Insulin signaling pathway	ko04910	KOG0393	Ras-related small GTPase, Rho type	sp|P17081|RHOQ_HUMAN	Rho-related GTP-binding protein RhoQ OS=Homo sapiens OX=9606 GN=RHOQ PE=1 SV=2
gene2748	1046	4.31	2.58	3.39	17.03	4.88	16.6	2.25055	9.01009e-06	0.00012172	LOC104940667	XP_010755620.2	dnaJ homolog subfamily B member 9 [Larimichthys crocea]	GO:0005777;GO:0016021;GO:0005905;GO:0008289;GO:0005829;GO:0000266;GO:0030672;GO:0005794;GO:0048511;GO:0003924;GO:0016559;GO:0005741;GO:0005525	peroxisome;integral component of membrane;clathrin-coated pit;lipid binding;cytosol;mitochondrial fission;synaptic vesicle membrane;Golgi apparatus;rhythmic process;GTPase activity;peroxisome fission;mitochondrial outer membrane;GTP binding	K09515	DNAJB9	http://www.genome.jp/dbget-bin/www_bget?ko:K09515	-	-	KOG0715	Molecular chaperone (DnaJ superfamily)	sp|G3H0N9|DNJB9_CRIGR	DnaJ homolog subfamily B member 9 OS=Cricetulus griseus OX=10029 GN=DNAJB9 PE=1 SV=1
novel.2936	4933	0.69	0.1	0.37	0.43	2	1.36	2.25041	0.00428522	0.0213836	-	KAF7653869.1	hypothetical protein LDENG_00077640 [Lucifuga dentata]	-	-	-	-	-	-	-	-	-	-	-
gene16347	6831	0.08	0.07	0.12	0.1	0.16	0.91	2.24993	0.00407372	0.0205226	myo7a	XP_027136378.1	unconventional myosin-VIIa [Larimichthys crocea]	GO:0016459;GO:0005524;GO:0005737;GO:0003774;GO:0051015	myosin complex;ATP binding;cytoplasm;cytoskeletal motor activity;actin filament binding	K10359	MYO7A,USH1B	http://www.genome.jp/dbget-bin/www_bget?ko:K10359	-	-	KOG4229	Myosin VII, myosin IXB and related myosins	sp|Q13402|MYO7A_HUMAN	Unconventional myosin-VIIa OS=Homo sapiens OX=9606 GN=MYO7A PE=1 SV=2
novel.848	468	9.23	9.38	5.97	22.88	9.96	68.28	2.24978	5.34959e-05	0.000553409	-	-	-	-	-	-	-	-	-	-	-	-	-	-
gene2417	1678	3.97	4.75	2.21	7.13	8.88	26.99	2.24941	7.4969e-07	1.42879e-05	LOC104940328	XP_019125731.1	uridine phosphorylase 1-like isoform X1 [Larimichthys crocea]	GO:0004850;GO:0005737;GO:0044206;GO:0009116;GO:0009166	uridine phosphorylase activity;cytoplasm;UMP salvage;nucleoside metabolic process;nucleotide catabolic process	K00757	udp,UPP	http://www.genome.jp/dbget-bin/www_bget?ko:K00757	Pyrimidine metabolism;Drug metabolism - other enzymes	ko00240,ko00983	-	-	sp|P52624|UPP1_MOUSE	Uridine phosphorylase 1 OS=Mus musculus OX=10090 GN=Upp1 PE=1 SV=2
novel.21533	2885	3.14	0.68	14.06	36.8	7.08	28.43	2.24885	0.0103465	0.0433162	pol	KAE8279517.1	Retrovirus-related Pol polyprotein Reverse transcriptase [Larimichthys crocea]	GO:0003676;GO:0015074;GO:0004190;GO:0004523;GO:0016021;GO:0046872;GO:0046718;GO:0003964	nucleic acid binding;DNA integration;aspartic-type endopeptidase activity;RNA-DNA hybrid ribonuclease activity;integral component of membrane;metal ion binding;viral entry into host cell;RNA-directed DNA polymerase activity	-	-	-	-	-	-	-	sp|P31792|POL_FENV1	Pol polyprotein (Fragment) OS=Feline endogenous virus ECE1 OX=11766 GN=pol PE=3 SV=1
gene16022	2911	4.49	1.56	5.85	5.28	15.24	17.41	2.24765	0.000421675	0.00314303	LOC104931905	XP_027132040.1;TMS01756.1;KAE8282656.1	serine/threonine-protein kinase WNK4 [Larimichthys crocea];Serine/threonine-protein kinase WNK4 [Larimichthys crocea];Serine/threonine-protein kinase WNK4 [Larimichthys crocea]	GO:0106311;GO:0106310;GO:0016301;GO:0005524	protein serine/threonine kinase activity;protein serine kinase activity;kinase activity;ATP binding	K08867	WNK,PRKWNK	http://www.genome.jp/dbget-bin/www_bget?ko:K08867	-	-	KOG0584	Serine/threonine protein kinase	sp|Q7TPK6|WNK4_RAT;sp|Q96J92|WNK4_HUMAN;sp|Q80UE6|WNK4_MOUSE	Serine/threonine-protein kinase WNK4 OS=Rattus norvegicus OX=10116 GN=Wnk4 PE=1 SV=3;Serine/threonine-protein kinase WNK4 OS=Homo sapiens OX=9606 GN=WNK4 PE=1 SV=1;Serine/threonine-protein kinase WNK4 OS=Mus musculus OX=10090 GN=Wnk4 PE=1 SV=1
gene2179	6319	2.03	2.78	1.57	9.93	3.92	9.12	2.24528	3.79288e-08	1.02815e-06	atp7a	XP_010753135.3	copper-transporting ATPase 1 [Larimichthys crocea]	GO:0016021;GO:0005507;GO:0005524;GO:0005794;GO:0140581	integral component of membrane;copper ion binding;ATP binding;Golgi apparatus;P-type monovalent copper transporter activity	K17686	copA,ctpA,ATP7	http://www.genome.jp/dbget-bin/www_bget?ko:K17686	Platinum drug resistance;Mineral absorption	ko01524,ko04978	KOG0207	Cation transport ATPase	sp|Q04656|ATP7A_HUMAN	Copper-transporting ATPase 1 OS=Homo sapiens OX=9606 GN=ATP7A PE=1 SV=4
gene10900	1434	4.41	8.13	1.89	6.82	12.18	38.01	2.24461	0.00014787	0.00130193	acot7	XP_010738562.1;XP_010738561.2	cytosolic acyl coenzyme A thioester hydrolase isoform X4 [Larimichthys crocea];cytosolic acyl coenzyme A thioester hydrolase isoform X2 [Larimichthys crocea]	GO:0016790	thiolester hydrolase activity	K17360	ACOT7	http://www.genome.jp/dbget-bin/www_bget?ko:K17360	Biosynthesis of unsaturated fatty acids;Fatty acid elongation	ko01040,ko00062	-	-	sp|Q91V12|BACH_MOUSE	Cytosolic acyl coenzyme A thioester hydrolase OS=Mus musculus OX=10090 GN=Acot7 PE=1 SV=2
gene12440	1780	8.11	10.78	10.5	49.66	22.74	28.03	2.24282	1.34813e-06	2.38922e-05	derl1	KAE8288485.1	Derlin-1 [Larimichthys crocea]	GO:0005789;GO:0016021	endoplasmic reticulum membrane;integral component of membrane	K11519	DERL1	http://www.genome.jp/dbget-bin/www_bget?ko:K11519	Protein processing in endoplasmic reticulum;Amyotrophic lateral sclerosis;Pathways of neurodegeneration - multiple diseases	ko04141,ko05014,ko05022	KOG0858	Predicted membrane protein	sp|Q5R9W3|DERL1_PONAB	Derlin-1 OS=Pongo abelii OX=9601 GN=DERL1 PE=2 SV=1
gene7402	4914	11.65	21.02	13.17	35.63	62.59	52.81	2.23868	1.47536e-06	2.57601e-05	slc38a4	XP_027131743.1	sodium-coupled neutral amino acid transporter 4 [Larimichthys crocea]	GO:0016021	integral component of membrane	K14991	SLC38A4,SNAT4	http://www.genome.jp/dbget-bin/www_bget?ko:K14991	-	-	-	-	sp|Q5RE87|S38A4_PONAB	Sodium-coupled neutral amino acid transporter 4 OS=Pongo abelii OX=9601 GN=SLC38A4 PE=2 SV=1
gene7411	1838	9.88	13.97	9.73	51.75	23.43	42.63	2.23677	1.5694e-08	4.71315e-07	LOC104922658	XP_010733847.1	uncharacterized protein LOC104922658 [Larimichthys crocea]	GO:0003723	RNA binding	-	-	-	-	-	-	-	-	-
gene436	2247	17.11	21.1	15.86	69.5	51.52	62.2	2.23551	7.60218e-10	3.19782e-08	nsfl1c	TMS16643.1	NSFL1 cofactor p47 [Larimichthys crocea]	GO:0005795	Golgi stack	K14012	NSFL1C,UBX1,SHP1	http://www.genome.jp/dbget-bin/www_bget?ko:K14012	Protein processing in endoplasmic reticulum	ko04141	KOG2086	Protein tyrosine phosphatase SHP1/Cofactor for p97 ATPase-mediated vesicle membrane fusion	sp|Q3SZC4|NSF1C_BOVIN	NSFL1 cofactor p47 OS=Bos taurus OX=9913 GN=NSFL1C PE=2 SV=1
gene21161	2228	5.24	5.24	6.61	17.11	18.79	19.76	2.23501	2.84892e-08	7.9667e-07	msto1	XP_019109798.1;TMS18294.1	protein misato homolog 1 isoform X2 [Larimichthys crocea];hypothetical protein E3U43_010620 [Larimichthys crocea]	GO:0005741	mitochondrial outer membrane	-	-	-	-	-	KOG2530	Members of tubulin/FtsZ family	sp|Q1L908|MSTO1_DANRE	Protein misato homolog 1 OS=Danio rerio OX=7955 GN=msto1 PE=2 SV=1
gene15394	3812	15.45	10.61	12.33	35.95	40.42	55.32	2.23465	2.16663e-10	1.02639e-08	LOC104931226	XP_019121102.2	hypoxia-inducible factor 1-alpha isoform X1 [Larimichthys crocea]	GO:0000976;GO:1990907;GO:0001654;GO:0014823;GO:0046983;GO:0051402;GO:0006355;GO:0008013;GO:0001666	transcription cis-regulatory region binding;beta-catenin-TCF complex;eye development;response to activity;protein dimerization activity;neuron apoptotic process;regulation of transcription, DNA-templated;beta-catenin binding;response to hypoxia	K08268	HIF1A	http://www.genome.jp/dbget-bin/www_bget?ko:K08268	Autophagy - animal;Mitophagy - animal;HIF-1 signaling pathway;Central carbon metabolism in cancer;Chemical carcinogenesis - reactive oxygen species;Choline metabolism in cancer;PD-L1 expression and PD-1 checkpoint pathway in cancer;Pathways in cancer;Proteoglycans in cancer;Renal cell carcinoma;Kaposi sarcoma-associated herpesvirus infection;Longevity regulating pathway - worm;Axon regeneration;T…	ko04140,ko04137,ko04066,ko05230,ko05208,ko05231,ko05235,ko05200,ko05205,ko05211,ko05167,ko04212,ko04361,ko04919,ko04659	-	-	sp|Q9YIB9|HIF1A_CHICK	Hypoxia-inducible factor 1-alpha OS=Gallus gallus OX=9031 GN=HIF1A PE=2 SV=2
gene15636	2016	0.75	0.15	0.79	2.82	1.62	1.44	2.23164	0.00204062	0.0116925	LOC104931489	XP_027147625.1;KAE8278337.1	trichohyalin-like [Larimichthys crocea];hypothetical protein D5F01_LYC23236 [Larimichthys crocea]	GO:0003779	actin binding	-	-	-	-	-	-	-	-	-
gene16138	2116	3.64	1.72	2.62	10.09	6.06	12.63	2.23095	9.29224e-08	2.29079e-06	sergef	XP_019109536.1	secretion-regulating guanine nucleotide exchange factor [Larimichthys crocea]	-	-	K15421	SERGEF	http://www.genome.jp/dbget-bin/www_bget?ko:K15421	-	-	KOG1426	FOG: RCC1 domain	sp|Q3MHW0|SRGEF_BOVIN	Secretion-regulating guanine nucleotide exchange factor OS=Bos taurus OX=9913 GN=SERGEF PE=2 SV=1
gene10841	1938	16.01	11.33	8.41	20.93	15.2	99.45	2.22717	2.55493e-05	0.000297328	LOC104926346	XP_027146823.1;XP_027146821.1;XP_027146819.1;XP_027146820.1	UDP-glucuronosyltransferase-like [Larimichthys crocea];UDP-glucuronosyltransferase-like isoform X3 [Larimichthys crocea];UDP-glucuronosyltransferase-like isoform X1 [Larimichthys crocea];UDP-glucuronosyltransferase-like isoform X2 [Larimichthys crocea]	GO:0008194;GO:0016021;GO:0015020	UDP-glycosyltransferase activity;integral component of membrane;glucuronosyltransferase activity	K00699	UGT	http://www.genome.jp/dbget-bin/www_bget?ko:K00699	Chemical carcinogenesis - DNA adducts;Chemical carcinogenesis - receptor activation;Ascorbate and aldarate metabolism;Pentose and glucuronate interconversions;Steroid hormone biosynthesis;Porphyrin and chlorophyll metabolism;Retinol metabolism;Drug metabolism - cytochrome P450;Drug metabolism - other enzymes;Metabolism of xenobiotics by cytochrome P450;Bile secretion	ko05204,ko05207,ko00053,ko00040,ko00140,ko00860,ko00830,ko00982,ko00983,ko00980,ko04976	-	-	sp|Q91280|UGT3_PLEPL	UDP-glucuronosyltransferase (Fragment) OS=Pleuronectes platessa OX=8262 GN=ugt3 PE=2 SV=1
gene22389	1056	6.81	12.44	7.49	28.38	24.03	41.82	2.22381	1.79943e-09	6.82735e-08	psmd10	TMS17834.1;PWA23474.1	26S proteasome non-ATPase regulatory subunit 10 [Larimichthys crocea];hypothetical protein CCH79_00005874 [Gambusia affinis]	GO:0042127;GO:0055088;GO:0000502;GO:0042981	regulation of cell population proliferation;lipid homeostasis;proteasome complex;regulation of apoptotic process	K06694	PSMD10	http://www.genome.jp/dbget-bin/www_bget?ko:K06694	-	-	-	-	sp|Q9Z2X3|PSD10_RAT	26S proteasome non-ATPase regulatory subunit 10 OS=Rattus norvegicus OX=10116 GN=Psmd10 PE=2 SV=1
gene14084	1638	3	1.22	2.33	3.25	6.83	14.91	2.22378	6.49873e-05	0.000655588	tyw5	XP_019123297.2	tRNA wybutosine-synthesizing protein 5 [Larimichthys crocea]	GO:0000049;GO:0031591;GO:0016706	tRNA binding;wybutosine biosynthetic process;2-oxoglutarate-dependent dioxygenase activity	K18066	TYW5	http://www.genome.jp/dbget-bin/www_bget?ko:K18066	-	-	KOG2132	Uncharacterized conserved protein, contains JmjC domain	sp|Q08BV2|TYW5_DANRE	tRNA wybutosine-synthesizing protein 5 OS=Danio rerio OX=7955 GN=tyw5 PE=2 SV=1
gene2309	4601	10.77	10.01	9.71	29.29	23.88	42.04	2.22154	3.52089e-13	3.02894e-11	ahctf1	TMS13504.1;XP_027137082.1	hypothetical protein E3U43_018579 [Larimichthys crocea];protein ELYS [Larimichthys crocea]	GO:0005634	nucleus	K25129	AHCTF1,ELYS	http://www.genome.jp/dbget-bin/www_bget?ko:K25129	Nucleocytoplasmic transport	ko03013	-	-	sp|Q8CJF7|ELYS_MOUSE	Protein ELYS OS=Mus musculus OX=10090 GN=Ahctf1 PE=1 SV=1
gene7429	4778	0.76	0.63	0.95	1.21	3.78	2.38	2.22143	0.000203832	0.00170038	abcc4	XP_027147037.1;KAE8299274.1	multidrug resistance-associated protein 4 [Larimichthys crocea];Multidrug resistance-associated protein 4 [Larimichthys crocea]	GO:0042626;GO:0005524;GO:0016021	ATPase-coupled transmembrane transporter activity;ATP binding;integral component of membrane	K05673	ABCC4	http://www.genome.jp/dbget-bin/www_bget?ko:K05673	ABC transporters;cAMP signaling pathway;Antifolate resistance;Bile secretion	ko02010,ko04024,ko01523,ko04976	-	-	sp|O15439|MRP4_HUMAN	ATP-binding cassette sub-family C member 4 OS=Homo sapiens OX=9606 GN=ABCC4 PE=1 SV=3
gene6530	1096	1.59	1.34	1.17	9.67	2.08	1.97	2.22131	0.00311957	0.0165018	LOC104921723	XP_010732645.2	dual specificity protein phosphatase 18 [Larimichthys crocea]	GO:0106306;GO:0106307;GO:0004725;GO:0017017	protein serine phosphatase activity;protein threonine phosphatase activity;protein tyrosine phosphatase activity;MAP kinase tyrosine/serine/threonine phosphatase activity	K14165	K14165	http://www.genome.jp/dbget-bin/www_bget?ko:K14165	-	-	KOG1716	Dual specificity phosphatase	sp|Q5R8X2|DUS18_PONAB;sp|Q5BIP9|DUS18_BOVIN	Dual specificity protein phosphatase 18 OS=Pongo abelii OX=9601 GN=DUSP18 PE=2 SV=1;Dual specificity protein phosphatase 18 OS=Bos taurus OX=9913 GN=DUSP18 PE=2 SV=1
gene16581	2218	0.52	0.77	0.75	3.03	1.72	2.16	2.22098	2.58166e-05	0.000299453	LOC104932507	KAE8299648.1	Tubulin polyglutamylase TTLL4 [Larimichthys crocea]	GO:0005524;GO:0018095	ATP binding;protein polyglutamylation	K16601	TTLL4	http://www.genome.jp/dbget-bin/www_bget?ko:K16601	-	-	-	-	-	-
gene10910	2657	0.7	0.18	0.64	0.78	0.84	4.96	2.21526	0.00222225	0.0125389	LOC104926419	XP_010738574.3	ERBB receptor feedback inhibitor 1 [Larimichthys crocea]	-	-	-	-	-	-	-	-	-	sp|Q99JZ7|ERRFI_MOUSE	ERBB receptor feedback inhibitor 1 OS=Mus musculus OX=10090 GN=Errfi1 PE=1 SV=1
gene11538	2411	7.64	8.46	12.35	27.41	25.03	55.04	2.21278	4.36286e-09	1.51181e-07	mdm2	XP_027138275.1	E3 ubiquitin-protein ligase Mdm2 [Larimichthys crocea]	GO:0005737;GO:0071157;GO:0042802;GO:0061630;GO:0005654;GO:0043066;GO:0000122;GO:0005730;GO:0046872	cytoplasm;regulation of cell cycle;identical protein binding;ubiquitin protein ligase activity;nucleoplasm;negative regulation of apoptotic process;negative regulation of transcription by RNA polymerase II;nucleolus;metal ion binding	K06643	MDM2	http://www.genome.jp/dbget-bin/www_bget?ko:K06643	Cell cycle;Cellular senescence;p53 signaling pathway;Endocytosis;FoxO signaling pathway;PI3K-Akt signaling pathway;Ubiquitin mediated proteolysis;MicroRNAs in cancer;Pathways in cancer;Proteoglycans in cancer;Transcriptional misregulation in cancer;Viral carcinogenesis;Bladder cancer;Chronic myeloid leukemia;Glioma;Melanoma;Prostate cancer;Endocrine resistance;Platinum drug resistance;Shigellosis…	ko04110,ko04218,ko04115,ko04144,ko04068,ko04151,ko04120,ko05206,ko05200,ko05205,ko05202,ko05203,ko05219,ko05220,ko05214,ko05218,ko05215,ko01522,ko01524,ko05131,ko05169,ko05163,ko05165,ko04919,ko04625	-	-	sp|O42354|MDM2_DANRE	E3 ubiquitin-protein ligase Mdm2 OS=Danio rerio OX=7955 GN=mdm2 PE=1 SV=1
gene17140	2179	0.25	0.56	0.63	2.14	0.49	2.94	2.21177	0.000870793	0.00575941	LOC104933084	XP_027141826.1	retinoic acid receptor beta [Larimichthys crocea]	GO:0004879;GO:0008270;GO:0005634;GO:0048384;GO:0043565	nuclear receptor activity;zinc ion binding;nucleus;retinoic acid receptor signaling pathway;sequence-specific DNA binding	K08528	RARB,NR1B2	http://www.genome.jp/dbget-bin/www_bget?ko:K08528	Pathways in cancer;Gastric cancer;Non-small cell lung cancer;Small cell lung cancer	ko05200,ko05226,ko05223,ko05222	-	-	sp|P10826|RARB_HUMAN	Retinoic acid receptor beta OS=Homo sapiens OX=9606 GN=RARB PE=1 SV=2
gene2526	2717	2.35	2.86	3.25	13.5	5.19	11.46	2.21046	4.27902e-07	8.7981e-06	armc10	XP_010755360.1	armadillo repeat-containing protein 10 [Larimichthys crocea]	GO:0016021	integral component of membrane	K24167	ARMC10	http://www.genome.jp/dbget-bin/www_bget?ko:K24167	-	-	-	-	sp|B1WBW4|ARM10_RAT	Armadillo repeat-containing protein 10 OS=Rattus norvegicus OX=10116 GN=Armc10 PE=1 SV=1
[truncated: 5,068 more rows]
