# Supplementary material for: Integrated transcriptomic and immune enzymatic analyses uncover coordinated immunometabolic responses in large yellow croaker (Larimichthys crocea) to Metanophrys sp. infection
Source: Front Immunol. 2025 Jul 16;16:1636453. doi: 10.3389/fimmu.2025.1636453 (PMC12307142; doi:10.3389/fimmu.2025.1636453)
Supplement: Supplementary file 4 [file Table4.xlsx]

## Sheet: Imm_Met
GeneID	logFC	Pvalue	KEGG_Pathway	Swiss-Prot_annotation
gene8962	6.51289	7.29124e-15	Cellular senescence;NF-kappa B signaling pathway;Phospholipase D signaling pathway;Cytokine-cytokine receptor interaction;Viral protein interaction with cytokine and cytokine receptor;Pathways in cancer;Transcriptional misregulation in cancer;Bladder cancer;Lipid and atherosclerosis;AGE-RAGE signaling pathway in diabetic complications;Alcoholic liver disease;Non-alcoholic fatty liver disease;Rheu…	Interleukin-8 OS=Gallus gallus OX=9031 GN=CXCL8 PE=2 SV=1
gene8147	6.16365	1.54106e-16	Necroptosis;MAPK signaling pathway;NF-kappa B signaling pathway;TNF signaling pathway;Cytokine-cytokine receptor interaction;Fluid shear stress and atherosclerosis;Lipid and atherosclerosis;Antifolate resistance;AGE-RAGE signaling pathway in diabetic complications;Alcoholic liver disease;Non-alcoholic fatty liver disease;Type I diabetes mellitus;Graft-versus-host disease;Inflammatory bowel diseas…	Interleukin-1 beta OS=Oncorhynchus mykiss OX=8022 GN=il1b PE=2 SV=1
gene6830	5.89943	0.00280638	Cellular senescence;FoxO signaling pathway;HIF-1 signaling pathway;JAK-STAT signaling pathway;PI3K-Akt signaling pathway;TNF signaling pathway;Cytokine-cytokine receptor interaction;Viral protein interaction with cytokine and cytokine receptor;Pathways in cancer;Transcriptional misregulation in cancer;Hypertrophic cardiomyopathy;Lipid and atherosclerosis;Antifolate resistance;EGFR tyrosine kinase…	Interleukin-6 OS=Paralichthys olivaceus OX=8255 GN=il6 PE=2 SV=1
gene1108	4.406	1.93818e-07	Endocytosis;MAPK signaling pathway;Protein processing in endoplasmic reticulum;Spliceosome;Lipid and atherosclerosis;Legionellosis;Toxoplasmosis;Measles;Prion disease;Longevity regulating pathway - multiple species;Estrogen signaling pathway;Antigen processing and presentation	Heat shock 70 kDa protein OS=Oncorhynchus tshawytscha OX=74940 GN=hsp70 PE=2 SV=1
gene1097	4.30346	4.7339e-14	TNF signaling pathway;MicroRNAs in cancer;Pathways in cancer;Proteoglycans in cancer;Transcriptional misregulation in cancer;Bladder cancer;Prostate cancer;Diabetic cardiomyopathy;Fluid shear stress and atherosclerosis;Lipid and atherosclerosis;Endocrine resistance;Hepatitis B;Estrogen signaling pathway;Relaxin signaling pathway;IL-17 signaling pathway;Leukocyte transendothelial migration	Matrix metalloproteinase-9 OS=Homo sapiens OX=9606 GN=MMP9 PE=1 SV=3
gene7165	2.56216	6.70488e-10	Ferroptosis;Peroxisome;Fatty acid biosynthesis;Fatty acid degradation;Adipocytokine signaling pathway;PPAR signaling pathway;Thermogenesis	Long-chain-fatty-acid--CoA ligase 4 OS=Homo sapiens OX=9606 GN=ACSL4 PE=1 SV=2
gene21751	2.40261	0.00267154	Cellular senescence;NF-kappa B signaling pathway;Phospholipase D signaling pathway;Cytokine-cytokine receptor interaction;Viral protein interaction with cytokine and cytokine receptor;Pathways in cancer;Transcriptional misregulation in cancer;Bladder cancer;Lipid and atherosclerosis;AGE-RAGE signaling pathway in diabetic complications;Alcoholic liver disease;Non-alcoholic fatty liver disease;Rheu…	Interleukin-8 OS=Gallus gallus OX=9031 GN=CXCL8 PE=2 SV=1
gene6114	2.02092	0.00154683	AMPK signaling pathway;Alcoholic liver disease;Insulin resistance;Propanoate metabolism;Pyruvate metabolism;Fatty acid biosynthesis;Adipocytokine signaling pathway;Glucagon signaling pathway;Insulin signaling pathway	Acetyl-CoA carboxylase 2 OS=Homo sapiens OX=9606 GN=ACACB PE=1 SV=3
gene3569	1.91293	0.0102365	Apoptosis;Cellular senescence;Focal adhesion;Signaling pathways regulating pluripotency of stem cells;Autophagy - animal;AMPK signaling pathway;Apelin signaling pathway;ErbB signaling pathway;FoxO signaling pathway;HIF-1 signaling pathway;JAK-STAT signaling pathway;MAPK signaling pathway;PI3K-Akt signaling pathway;Phospholipase D signaling pathway;Rap1 signaling pathway;Ras signaling pathway;Sphi…	RAC-gamma serine/threonine-protein kinase OS=Homo sapiens OX=9606 GN=AKT3 PE=1 SV=1
gene9288	1.86133	4.48486e-06	Necroptosis;PI3K-Akt signaling pathway;Protein processing in endoplasmic reticulum;Chemical carcinogenesis - receptor activation;Pathways in cancer;Prostate cancer;Fluid shear stress and atherosclerosis;Lipid and atherosclerosis;Salmonella infection;Estrogen signaling pathway;Progesterone-mediated oocyte maturation;Antigen processing and presentation;IL-17 signaling pathway;NOD-like receptor sign…	Heat shock protein HSP 90-alpha 1 OS=Danio rerio OX=7955 GN=hsp90a.1 PE=1 SV=3;Heat shock protein HSP 90-alpha OS=Homo sapiens OX=9606 GN=HSP90AA1 PE=1 SV=5
gene20177	1.69993	0.00202142	NF-kappa B signaling pathway;TNF signaling pathway;Cell adhesion molecules;Fluid shear stress and atherosclerosis;Lipid and atherosclerosis;AGE-RAGE signaling pathway in diabetic complications;African trypanosomiasis;Malaria;Leukocyte transendothelial migration	Vascular cell adhesion protein 1 OS=Homo sapiens OX=9606 GN=VCAM1 PE=1 SV=1
novel.19138	1.65288	0.00599451	Apoptosis;Cellular senescence;Focal adhesion;Signaling pathways regulating pluripotency of stem cells;Autophagy - animal;AMPK signaling pathway;Apelin signaling pathway;ErbB signaling pathway;FoxO signaling pathway;HIF-1 signaling pathway;JAK-STAT signaling pathway;MAPK signaling pathway;PI3K-Akt signaling pathway;Phospholipase D signaling pathway;Rap1 signaling pathway;Ras signaling pathway;Sphi…	RAC-beta serine/threonine-protein kinase OS=Homo sapiens OX=9606 GN=AKT2 PE=1 SV=2;RAC-beta serine/threonine-protein kinase B OS=Xenopus laevis OX=8355 GN=akt2-b PE=2 SV=1
gene2319	1.48165	0.00140126	Apoptosis;Cellular senescence;Regulation of actin cytoskeleton;Focal adhesion;Gap junction;Signaling pathways regulating pluripotency of stem cells;Autophagy - animal;Apelin signaling pathway;ErbB signaling pathway;FoxO signaling pathway;JAK-STAT signaling pathway;MAPK signaling pathway;PI3K-Akt signaling pathway;Phospholipase D signaling pathway;Rap1 signaling pathway;Ras signaling pathway;Sphin…	RAF proto-oncogene serine/threonine-protein kinase OS=Gallus gallus OX=9031 GN=RAF1 PE=2 SV=1
gene17353	1.37971	1.54486e-06	Regulation of actin cytoskeleton;Adherens junction;Focal adhesion;Tight junction;Endocytosis;Phospholipase D signaling pathway;Rap1 signaling pathway;Ras signaling pathway;Sphingolipid signaling pathway;TGF-beta signaling pathway;Wnt signaling pathway;cAMP signaling pathway;cGMP-PKG signaling pathway;mTOR signaling pathway;MicroRNAs in cancer;Pathways in cancer;Proteoglycans in cancer;Viral carci…	Rho-related GTP-binding protein RhoA-B OS=Danio rerio OX=7955 GN=rhoab PE=1 SV=1
gene2897	1.34242	0.000699196	Tight junction;Lipid and atherosclerosis;Antigen processing and presentation	Heat shock 70 kDa protein 4 OS=Homo sapiens OX=9606 GN=HSPA4 PE=1 SV=4
gene5378	1.28246	0.00640124	AMPK signaling pathway;Alcoholic liver disease;Insulin resistance;Fatty acid degradation;Adipocytokine signaling pathway;Glucagon signaling pathway;PPAR signaling pathway;Thermogenesis	Carnitine O-palmitoyltransferase 1, liver isoform OS=Homo sapiens OX=9606 GN=CPT1A PE=1 SV=2
gene1031	1.16682	0.00545698	Necroptosis;Signaling pathways regulating pluripotency of stem cells;FoxO signaling pathway;HIF-1 signaling pathway;JAK-STAT signaling pathway;Chemical carcinogenesis - receptor activation;MicroRNAs in cancer;PD-L1 expression and PD-1 checkpoint pathway in cancer;Pathways in cancer;Proteoglycans in cancer;Viral carcinogenesis;Acute myeloid leukemia;Non-small cell lung cancer;Pancreatic cancer;Lip…	Signal transducer and activator of transcription 3 OS=Rattus norvegicus OX=10116 GN=Stat3 PE=1 SV=1
gene17284	1.14699	0.000190047	Apelin signaling pathway;PI3K-Akt signaling pathway;Phospholipase D signaling pathway;cGMP-PKG signaling pathway;Salmonella infection;Toxoplasmosis;Kaposi sarcoma-associated herpesvirus infection;Inositol phosphate metabolism;Adrenergic signaling in cardiomyocytes;Oxytocin signaling pathway;Chemokine signaling pathway;Platelet activation;Cholinergic synapse	Phosphatidylinositol 4,5-bisphosphate 3-kinase catalytic subunit gamma isoform OS=Sus scrofa OX=9823 GN=PIK3CG PE=1 SV=2
gene986	1.14161	0.00580271	Protein export;Protein processing in endoplasmic reticulum;Lipid and atherosclerosis;Amyotrophic lateral sclerosis;Parkinson disease;Pathways of neurodegeneration - multiple diseases;Prion disease;Thyroid hormone synthesis;Antigen processing and presentation	Endoplasmic reticulum chaperone BiP OS=Bos taurus OX=9913 GN=HSPA5 PE=2 SV=1
gene12981	1.08426	0.0120304	Apoptosis;NF-kappa B signaling pathway;TNF signaling pathway;cAMP signaling pathway;Chemical carcinogenesis - reactive oxygen species;PD-L1 expression and PD-1 checkpoint pathway in cancer;Pathways in cancer;Viral carcinogenesis;Chronic myeloid leukemia;Prostate cancer;Small cell lung cancer;Lipid and atherosclerosis;Alcoholic liver disease;Insulin resistance;Epithelial cell signaling in Helicoba…	NF-kappa-B inhibitor alpha OS=Mus musculus OX=10090 GN=Nfkbia PE=1 SV=2
