# Supplementary material for: Integrated transcriptomic and immune enzymatic analyses uncover coordinated immunometabolic responses in large yellow croaker (Larimichthys crocea) to Metanophrys sp. infection
Source: Front Immunol. 2025 Jul 16;16:1636453. doi: 10.3389/fimmu.2025.1636453 (PMC12307142; doi:10.3389/fimmu.2025.1636453)
Supplement: Supplementary file 5 [file Table5.xlsx]

## Sheet: C-vs-IN.total.down.DEG
GeneID	Length	C1	C2	C3	IN1	IN2	IN3	logFC	Pvalue	FDR	Gene_name	NR_ID	NR_annotation	GO_ID	GO_term	KO_ID	KO_gene	KO_Hyperlink	KEGG_Pathway	Pathway_ID	KOG_ID	KOG_annotation	Swiss-Prot_ID	Swiss-Prot_annotation
novel.15102	1430	6.98	8.18	3.76	0.76	0.27	1.59	-2.57607	1.62242e-06	2.79146e-05	-	TKS92897.1	Arf-GAP with [Collichthys lucidus]	GO:0007165;GO:0005737;GO:0005096;GO:0043547	signal transduction;cytoplasm;GTPase activator activity;positive regulation of GTPase activity	K18440	ARAP2	http://www.genome.jp/dbget-bin/www_bget?ko:K18440	Endocytosis	ko04144	-	-	-	-
gene16231	3843	0.25	0.3	0.1	0	0.01	0.02	-4.01844	0.00484418	0.0235656	LOC104932134	XP_019130979.1	membrane-associated guanylate kinase, WW and PDZ domain-containing protein 1 isoform X2 [Larimichthys crocea]	GO:0016020;GO:0016301;GO:0030054	membrane;kinase activity;cell junction	-	-	-	-	-	KOG3209	WW domain-containing protein	sp|Q9WVQ1|MAGI2_MOUSE	Membrane-associated guanylate kinase, WW and PDZ domain-containing protein 2 OS=Mus musculus OX=10090 GN=Magi2 PE=1 SV=2
gene10415	2425	2.78	3.63	2.31	0.19	0.03	0	-5.01547	9.01203e-10	3.70285e-08	haao	KAE8280338.1	3-hydroxyanthranilate 3,4-dioxygenase [Larimichthys crocea]	GO:0000334;GO:0019805;GO:0008198;GO:0034354;GO:0043420;GO:0005737;GO:0006569	3-hydroxyanthranilate 3,4-dioxygenase activity;quinolinate biosynthetic process;ferrous iron binding;'de novo' NAD biosynthetic process from tryptophan;anthranilate metabolic process;cytoplasm;tryptophan catabolic process	K00452	HAAO	http://www.genome.jp/dbget-bin/www_bget?ko:K00452	Tryptophan metabolism	ko00380	-	-	sp|Q5U3F8|3HAO_DANRE	3-hydroxyanthranilate 3,4-dioxygenase OS=Danio rerio OX=7955 GN=haao PE=2 SV=1
gene718	2927	0.2	1.42	2.15	0	0.06	0.08	-4.40932	3.77317e-05	0.000412733	LOC104922969	TMS13606.1;XP_019117093.2	Protein-lysine methyltransferase METTL21C [Larimichthys crocea];uncharacterized protein LOC104922969 [Larimichthys crocea]	GO:0008168;GO:0032259	methyltransferase activity;methylation	K21805	METTL21C	http://www.genome.jp/dbget-bin/www_bget?ko:K21805	-	-	KOG2793	Putative N2,N2-dimethylguanosine tRNA methyltransferase	sp|A6QP81|MT21C_BOVIN	Protein-lysine methyltransferase METTL21C OS=Bos taurus OX=9913 GN=METTL21C PE=2 SV=1
gene15411	3908	0.77	3.22	1.18	0.45	0.08	0.46	-2.21515	0.00170882	0.0100852	LOC104931247	XP_027144614.1;XP_019108796.2	phosphatidylinositol 4,5-bisphosphate 3-kinase catalytic subunit gamma isoform isoform X2 [Larimichthys crocea];phosphatidylinositol 4,5-bisphosphate 3-kinase catalytic subunit gamma isoform isoform X1 [Larimichthys crocea]	GO:0005524;GO:0016301;GO:0046854;GO:0048015	ATP binding;kinase activity;phosphatidylinositol phosphate biosynthetic process;phosphatidylinositol-mediated signaling	K21289	PIK3CG	http://www.genome.jp/dbget-bin/www_bget?ko:K21289	Apelin signaling pathway;PI3K-Akt signaling pathway;Phospholipase D signaling pathway;cGMP-PKG signaling pathway;Salmonella infection;Toxoplasmosis;Kaposi sarcoma-associated herpesvirus infection;Inositol phosphate metabolism;Adrenergic signaling in cardiomyocytes;Oxytocin signaling pathway;Chemokine signaling pathway;Platelet activation;Cholinergic synapse	ko04371,ko04151,ko04072,ko04022,ko05132,ko05145,ko05167,ko00562,ko04261,ko04921,ko04062,ko04611,ko04725	-	-	sp|Q9JHG7|PK3CG_MOUSE	Phosphatidylinositol 4,5-bisphosphate 3-kinase catalytic subunit gamma isoform OS=Mus musculus OX=10090 GN=Pik3cg PE=1 SV=2
gene1124	2430	2.56	6.93	2.69	0.48	0.17	0.65	-2.89052	5.26877e-07	1.04851e-05	LOC104926894	XP_027144801.1;XP_027144800.1	midasin-like isoform X2 [Larimichthys crocea];midasin-like isoform X1 [Larimichthys crocea]	GO:0016021	integral component of membrane	-	-	-	-	-	-	-	-	-
gene9113	3888	6.3	7.19	5.97	1.21	1.73	2.4	-1.45832	9.11917e-05	0.000867651	lrig3	XP_010736187.1	leucine-rich repeats and immunoglobulin-like domains protein 3 [Larimichthys crocea]	-	-	K24610	LRIG1_3	http://www.genome.jp/dbget-bin/www_bget?ko:K24610	-	-	KOG4194	Membrane glycoprotein LIG-1	sp|Q6UXM1|LRIG3_HUMAN	Leucine-rich repeats and immunoglobulin-like domains protein 3 OS=Homo sapiens OX=9606 GN=LRIG3 PE=1 SV=1
gene18236	2958	3.7	7.85	2.26	0.36	0.31	0.98	-3.02511	8.31809e-06	0.000113695	arap2	XP_027143534.1;KAE8279140.1	arf-GAP with Rho-GAP domain, ANK repeat and PH domain-containing protein 2 [Larimichthys crocea];Arf-GAP with Rho-GAP domain, ANK repeat and PH domain-containing protein 2 Centaurin-delta-1 [Larimichthys crocea]	GO:0043547;GO:0005096;GO:0007165;GO:0005737	positive regulation of GTPase activity;GTPase activator activity;signal transduction;cytoplasm	K18440	ARAP2	http://www.genome.jp/dbget-bin/www_bget?ko:K18440	Endocytosis	ko04144	KOG1117	Rho- and Arf-GTPase activating protein ARAP3	sp|Q8BZ05|ARAP2_MOUSE	Arf-GAP with Rho-GAP domain, ANK repeat and PH domain-containing protein 2 OS=Mus musculus OX=10090 GN=Arap2 PE=1 SV=2
gene2042	2410	1.64	2.62	1.91	0.75	0.34	1	-1.22242	0.0116731	0.047717	zic1	KAF7667077.1	hypothetical protein LDENG_00079380, partial [Lucifuga dentata]	GO:0060059;GO:0021534;GO:0046872;GO:0005634;GO:0003677;GO:0048853;GO:0021592	embryonic retina morphogenesis in camera-type eye;cell proliferation in hindbrain;metal ion binding;nucleus;DNA binding;forebrain morphogenesis;fourth ventricle development	K09224	ZIC1	http://www.genome.jp/dbget-bin/www_bget?ko:K09224	-	-	KOG1721	FOG: Zn-finger	sp|O73689|ZIC1_XENLA	Zinc finger protein ZIC 1 OS=Xenopus laevis OX=8355 GN=zic1 PE=2 SV=1
gene17289	2683	9.65	9.06	10.17	3.08	1.13	6.45	-1.11169	0.00843074	0.0367488	il15ra	KAE8281647.1;XP_010746940.2	hypothetical protein D5F01_LYC20641 [Larimichthys crocea];interleukin-15 receptor subunit alpha isoform X1 [Larimichthys crocea]	GO:0000723;GO:0042010;GO:0016787;GO:0003678;GO:0006281;GO:0006310;GO:0005524;GO:0016021	telomere maintenance;interleukin-15 receptor activity;hydrolase activity;DNA helicase activity;DNA repair;DNA recombination;ATP binding;integral component of membrane	K05074	IL15RA,CD215	http://www.genome.jp/dbget-bin/www_bget?ko:K05074	JAK-STAT signaling pathway;Cytokine-cytokine receptor interaction;Pathways in cancer;Human T-cell leukemia virus 1 infection;Intestinal immune network for IgA production	ko04630,ko04060,ko05200,ko05166,ko04672	-	-	sp|Q13261|I15RA_HUMAN	Interleukin-15 receptor subunit alpha OS=Homo sapiens OX=9606 GN=IL15RA PE=1 SV=1
novel.15250	1015	70.51	26.54	28.18	6.51	5.79	9.55	-2.09829	7.5719e-06	0.000105394	-	TMS01143.1	hypothetical protein E3U43_021098 [Larimichthys crocea]	-	-	K23767	S100A14	http://www.genome.jp/dbget-bin/www_bget?ko:K23767	-	-	-	-	-	-
gene2588	1160	1.81	4.67	1.87	0.41	0	0.57	-2.8317	0.000944011	0.00615333	LOC104940516	XP_019123756.1;XP_019123757.1	uncharacterized protein LOC109140694 isoform X1 [Larimichthys crocea];uncharacterized protein LOC109140694 isoform X2 [Larimichthys crocea]	-	-	-	-	-	-	-	-	-	-	-
gene10269	2659	20.25	16.56	9.2	2.89	1.7	6.1	-1.66642	3.42458e-05	0.000380994	LOC104925742	XP_027143505.1	E3 ubiquitin-protein ligase TRIM21 [Larimichthys crocea]	-	-	-	-	-	-	-	-	-	sp|O15553|MEFV_HUMAN	Pyrin OS=Homo sapiens OX=9606 GN=MEFV PE=1 SV=1
novel.15700	1234	5.75	4.29	1.8	0.28	0.47	0.58	-2.83847	1.13687e-05	0.000148616	MS4A8	XP_027143201.1;KAE8289178.1	uncharacterized protein LOC113747489 isoform X2 [Larimichthys crocea];hypothetical protein D5F01_LYC13058 [Larimichthys crocea]	GO:0016021	integral component of membrane	-	-	-	-	-	-	-	sp|Q9BY19|M4A8_HUMAN	Membrane-spanning 4-domains subfamily A member 8 OS=Homo sapiens OX=9606 GN=MS4A8 PE=2 SV=1
novel.21153	409	28.27	20.91	26.51	7.25	6.16	9.89	-1.29022	0.0102023	0.0429156	-	TKS65475.1	hypothetical protein D9C73_028281 [Collichthys lucidus]	GO:0005179;GO:0005576;GO:0003964	hormone activity;extracellular region;RNA-directed DNA polymerase activity	-	-	-	-	-	-	-	-	-
gene3447	2479	29.9	21.08	14.54	1.62	1.21	6.88	-2.69169	1.59723e-08	4.77936e-07	LOC104918385	XP_027135337.1;KAE8298282.1;XP_027135336.1;XP_027135339.1	plakophilin-1 isoform X2 [Larimichthys crocea];Plakophilin-1 Band-6 protein [Larimichthys crocea];plakophilin-1 isoform X1 [Larimichthys crocea];plakophilin-1 isoform X4 [Larimichthys crocea]	GO:0030057;GO:0005634;GO:0098609	desmosome;nucleus;cell-cell adhesion	K10387	PKP1	http://www.genome.jp/dbget-bin/www_bget?ko:K10387	-	-	KOG1048	Neural adherens junction protein Plakophilin and related Armadillo repeat proteins	sp|Q28161|PKP1_BOVIN;sp|P97350|PKP1_MOUSE	Plakophilin-1 OS=Bos taurus OX=9913 GN=PKP1 PE=2 SV=1;Plakophilin-1 OS=Mus musculus OX=10090 GN=Pkp1 PE=1 SV=1
gene10734	5662	7.56	10.29	10.65	0.67	0.72	1.03	-3.15762	5.19716e-17	9.98176e-15	LOC104926245	XP_019116363.2	collagen alpha-1(XVIII) chain isoform X4 [Larimichthys crocea]	GO:0005581	collagen trimer	K06823	COL18A	http://www.genome.jp/dbget-bin/www_bget?ko:K06823	Protein digestion and absorption	ko04974	KOG3546	Collagens (type XV)	sp|P39060|COIA1_HUMAN	Collagen alpha-1(XVIII) chain OS=Homo sapiens OX=9606 GN=COL18A1 PE=1 SV=5
gene11572	2464	0.87	0.69	0.82	0.05	0.1	0.13	-2.75788	0.000382259	0.00289098	ttll10	XP_027144617.1	inactive polyglycylase TTLL10 isoform X1 [Larimichthys crocea]	GO:0006464	cellular protein modification process	K23628	TTLL10	http://www.genome.jp/dbget-bin/www_bget?ko:K23628	-	-	-	-	sp|A4Q9F3|TTL10_MOUSE	Protein polyglycylase TTLL10 OS=Mus musculus OX=10090 GN=Ttll10 PE=1 SV=1
gene12784	943	12.87	7.95	7.52	1.69	2.43	3.49	-1.48475	0.0017252	0.0101722	LOC104928446	XP_008298528.1	PREDICTED: exostosin-1c-like, partial [Stegastes partitus]	GO:0006486;GO:0046872;GO:0016757;GO:0005789;GO:0050508;GO:0015012;GO:0016021;GO:0050509	protein glycosylation;metal ion binding;glycosyltransferase activity;endoplasmic reticulum membrane;glucuronosyl-N-acetylglucosaminyl-proteoglycan 4-alpha-N-acetylglucosaminyltransferase activity;heparan sulfate proteoglycan biosynthetic process;integral component of membrane;N-acetylglucosaminyl-proteoglycan 4-beta-glucuronosyltransferase activity	K02366	EXT1	http://www.genome.jp/dbget-bin/www_bget?ko:K02366	Glycosaminoglycan biosynthesis - heparan sulfate / heparin	ko00534	KOG1021	Acetylglucosaminyltransferase EXT1/exostosin 1	sp|Q5IGR6|EXT1C_DANRE	Exostosin-1c OS=Danio rerio OX=7955 GN=ext1c PE=2 SV=1
gene8304	2272	2.81	4.99	2.1	0.15	0.18	0.28	-3.61308	3.86298e-10	1.73386e-08	hsh2d	TMS20337.1	Hematopoietic SH2 domain-containing protein-like protein [Larimichthys crocea]	GO:0007165	signal transduction	K23699	HSH2D	http://www.genome.jp/dbget-bin/www_bget?ko:K23699	-	-	-	-	sp|Q56A36|HSH2D_DANRE	Hematopoietic SH2 domain-containing protein homolog OS=Danio rerio OX=7955 GN=hsh2d PE=2 SV=1
gene4599	851	38.09	108.08	37.82	0.62	0.91	0.67	-5.86722	3.70768e-22	1.39184e-19	LOC104919656	KAE8293675.1	Cadherin-like protein 26 Cadherin-like protein VR20 Precursor [Larimichthys crocea]	GO:0016021;GO:0005886;GO:0007156;GO:0005509	integral component of membrane;plasma membrane;homophilic cell adhesion via plasma membrane adhesion molecules;calcium ion binding	K22658	CDH26	http://www.genome.jp/dbget-bin/www_bget?ko:K22658	-	-	-	-	sp|Q8IXH8|CAD26_HUMAN	Cadherin-like protein 26 OS=Homo sapiens OX=9606 GN=CDH26 PE=1 SV=4
gene21600	1106	1.21	5.3	1.91	0.62	0.31	0.33	-2.23083	0.0059171	0.0276712	LOC104937831	XP_010752445.3	uncharacterized protein LOC104937831 isoform X1 [Larimichthys crocea]	GO:0016021;GO:0005886	integral component of membrane;plasma membrane	-	-	-	-	-	-	-	-	-
gene4497	1873	31.19	38.3	19.35	11.2	6.25	14.65	-1.08619	0.00228227	0.0128221	LOC104919509	XP_010729854.1	mitogen-activated protein kinase 13 [Larimichthys crocea]	GO:0106310;GO:0106311;GO:0004707;GO:0005524	protein serine kinase activity;protein serine/threonine kinase activity;MAP kinase activity;ATP binding	K04441	P38	http://www.genome.jp/dbget-bin/www_bget?ko:K04441	Cellular senescence;Oocyte meiosis;Signaling pathways regulating pluripotency of stem cells;FoxO signaling pathway;MAPK signaling pathway;MAPK signaling pathway - fly;Rap1 signaling pathway;Sphingolipid signaling pathway;TNF signaling pathway;VEGF signaling pathway;Chemical carcinogenesis - reactive oxygen species;PD-L1 expression and PD-1 checkpoint pathway in cancer;Proteoglycans in cancer;Diab…	ko04218,ko04114,ko04550,ko04068,ko04010,ko04013,ko04015,ko04071,ko04668,ko04370,ko05208,ko05235,ko05205,ko05415,ko05418,ko05417,ko01522,ko04933,ko04936,ko04932,ko05120,ko05130,ko05133,ko05132,ko05131,ko05152,ko05135,ko05142,ko05140,ko05145,ko05171,ko05169,ko05161,ko05163,ko05170,ko05167,ko05014,ko05022,ko05020,ko04212,ko04261,ko04361,ko04380,ko04912,ko04935,ko04914,ko04917,ko04926,ko04714,ko04625…	KOG0660	Mitogen-activated protein kinase	sp|Q3T0N5|MK13_BOVIN	Mitogen-activated protein kinase 13 OS=Bos taurus OX=9913 GN=MAPK13 PE=2 SV=1
novel.7774	729	2.35	4.01	4.53	0	0	0	-6.99384	1.05204e-06	1.91289e-05	Clec10a	XP_019119725.1	snaclec coagulation factor IX/factor X-binding protein subunit B-like isoform X1 [Larimichthys crocea]	GO:0016021	integral component of membrane	K22244	REG4	http://www.genome.jp/dbget-bin/www_bget?ko:K22244	Gastric cancer	ko05226	-	-	sp|P49300|CLC10_MOUSE	C-type lectin domain family 10 member A OS=Mus musculus OX=10090 GN=Clec10a PE=1 SV=1
gene12904	7385	2.8	3.87	1.72	0.52	0.37	1.39	-1.61443	0.000192487	0.00161938	LOC104928573	XP_027147174.1;XP_027147180.1	nck-associated protein 5 isoform X1 [Larimichthys crocea];nck-associated protein 5 isoform X5 [Larimichthys crocea]	-	-	-	-	-	-	-	-	-	sp|O14513|NCKP5_HUMAN	Nck-associated protein 5 OS=Homo sapiens OX=9606 GN=NCKAP5 PE=1 SV=2
gene8458	1965	2.84	30.81	3.59	0.73	1.02	0.43	-3.41518	7.14803e-05	0.000709533	LOC104923801	TMS08225.1	hypothetical protein E3U43_005708 [Larimichthys crocea]	GO:0001503;GO:0007155	ossification;cell adhesion	-	-	-	-	-	-	-	-	-
gene23032	3108	5.29	8	5.54	2.28	1.1	5.39	-1.10427	0.00494351	0.0239641	tmem170b	XP_030003325.1;TMS18612.1	transmembrane protein 170B [Sphaeramia orbicularis];Transmembrane protein 170B [Larimichthys crocea]	GO:0016021	integral component of membrane	-	-	-	-	-	-	-	sp|P86050|T170B_MOUSE	Transmembrane protein 170B OS=Mus musculus OX=10090 GN=Tmem170b PE=3 SV=1
gene12756	2659	0.29	1.45	0.23	0.04	0.09	0.05	-2.91954	0.00526378	0.0252303	LOC104928413	XP_010741002.1;XP_010741000.1	eomesodermin isoform X2 [Larimichthys crocea];eomesodermin isoform X1 [Larimichthys crocea]	GO:0000981;GO:0003677;GO:0042074;GO:0048382;GO:0005634;GO:0055109;GO:0001714;GO:0048263;GO:0090504;GO:0003700;GO:0005737	DNA-binding transcription factor activity, RNA polymerase II-specific;DNA binding;cell migration involved in gastrulation;mesendoderm development;nucleus;invagination involved in gastrulation with mouth forming second;endodermal cell fate specification;determination of dorsal identity;epiboly;DNA-binding transcription factor activity;cytoplasm	K10173	EOMES,TBR2	http://www.genome.jp/dbget-bin/www_bget?ko:K10173	-	-	-	-	sp|P79944|EOMES_XENLA	Eomesodermin OS=Xenopus laevis OX=8355 GN=eomes PE=2 SV=1
gene3530	2587	5.49	14.04	5.5	0.29	0.36	0.58	-3.93432	5.07792e-14	5.11425e-12	LOC104918500	TMS20199.1	Olfactomedin-like protein 2B [Larimichthys crocea]	GO:0016021;GO:0005634	integral component of membrane;nucleus	-	-	-	-	-	-	-	sp|Q68BL8|OLM2B_HUMAN	Olfactomedin-like protein 2B OS=Homo sapiens OX=9606 GN=OLFML2B PE=2 SV=2
gene23423	4675	10.49	9.69	7.84	2.77	2.2	6.65	-1.089	0.00215133	0.012209	LOC104939765	XP_024910764.1;XP_037533285.1	neurofibromin-like [Cynoglossus semilaevis];neurofibromin-like [Nematolebias whitei]	GO:0007165;GO:0043087	signal transduction;regulation of GTPase activity	K08052	NF1	http://www.genome.jp/dbget-bin/www_bget?ko:K08052	MAPK signaling pathway;Ras signaling pathway;EGFR tyrosine kinase inhibitor resistance	ko04010,ko04014,ko01521	-	-	sp|P97526|NF1_RAT	Neurofibromin OS=Rattus norvegicus OX=10116 GN=Nf1 PE=1 SV=1
gene3160	709	17.36	13.95	4.74	2.23	0.36	2.8	-2.40656	0.000399032	0.0029977	LOC104918068	XP_010727994.3	baculoviral IAP repeat-containing protein 5.2 [Larimichthys crocea]	-	-	K08731	BIRC5	http://www.genome.jp/dbget-bin/www_bget?ko:K08731	Apoptosis;Apoptosis - multiple species;Hippo signaling pathway;Chemical carcinogenesis - receptor activation;Pathways in cancer;Colorectal cancer;Platinum drug resistance;Hepatitis B	ko04210,ko04215,ko04390,ko05207,ko05200,ko05210,ko01524,ko05161	KOG1101	Apoptosis inhibitor IAP1 and related BIR domain proteins	sp|Q28ER3|BIR52_XENTR	Baculoviral IAP repeat-containing protein 5.2 OS=Xenopus tropicalis OX=8364 GN=birc5.2 PE=2 SV=2
novel.2444	683	1.89	4.07	2.35	0.12	0.38	0.68	-2.45994	0.00811022	0.0356208	CYTL1	XP_019120102.1	cytokine-like protein 1 [Larimichthys crocea]	-	-	-	-	-	-	-	-	-	sp|Q9NRR1|CYTL1_HUMAN	Cytokine-like protein 1 OS=Homo sapiens OX=9606 GN=CYTL1 PE=1 SV=1
gene2048	1893	0.92	3.92	2.64	0.38	0.13	0.62	-2.44543	0.000524586	0.0037651	LOC104937287	XP_027129978.1	sodium/hydrogen exchanger 9 [Larimichthys crocea]	GO:0016021;GO:0015385;GO:0006885;GO:0010008	integral component of membrane;sodium:proton antiporter activity;regulation of pH;endosome membrane	K14725	SLC9A9,NHE9	http://www.genome.jp/dbget-bin/www_bget?ko:K14725	-	-	KOG1965	Sodium/hydrogen exchanger protein	sp|Q8IVB4|SL9A9_HUMAN	Sodium/hydrogen exchanger 9 OS=Homo sapiens OX=9606 GN=SLC9A9 PE=1 SV=1
gene23211	1907	3.74	3.85	2.11	0.98	0.42	1.61	-1.3765	0.00450328	0.0222258	LOC104939536	XP_027143781.1	ubiquitin carboxyl-terminal hydrolase 17-like protein A [Larimichthys crocea]	GO:0004843;GO:0016579;GO:0006511	thiol-dependent deubiquitinase;protein deubiquitination;ubiquitin-dependent protein catabolic process	-	-	-	-	-	KOG1864	Ubiquitin-specific protease	sp|Q24574|UBPE_DROME	Ubiquitin carboxyl-terminal hydrolase 47 OS=Drosophila melanogaster OX=7227 GN=Usp47 PE=1 SV=2
gene2518	2089	0.9	0.86	0.37	0.03	0	0.06	-4.23071	0.000395435	0.0029761	LOC104940442	KAE8296425.1	putative adenosylhomocysteinase 3 [Larimichthys crocea]	GO:0006730;GO:0004013	one-carbon metabolic process;adenosylhomocysteinase activity	K01251	E3.3.1.1,ahcY	http://www.genome.jp/dbget-bin/www_bget?ko:K01251	Cysteine and methionine metabolism	ko00270	KOG1370	S-adenosylhomocysteine hydrolase	sp|Q5R889|SAHH3_PONAB	Putative adenosylhomocysteinase 3 OS=Pongo abelii OX=9601 GN=AHCYL2 PE=2 SV=1
gene21650	2239	1.76	2.24	2.09	0.12	0.28	0.88	-1.9787	0.00187986	0.0109409	mex3b	XP_027138723.1;XP_027138724.1	RNA-binding protein MEX3B isoform X1 [Larimichthys crocea];RNA-binding protein MEX3B isoform X2 [Larimichthys crocea]	GO:0005634;GO:0003723;GO:0046872	nucleus;RNA binding;metal ion binding	K15686	MEX3,RKHD	http://www.genome.jp/dbget-bin/www_bget?ko:K15686	-	-	KOG2113	Predicted RNA binding protein, contains KH domain	sp|A1L3F4|MEX3B_XENLA	RNA-binding protein MEX3B OS=Xenopus laevis OX=8355 GN=mex3b PE=2 SV=1
gene13768	1291	3.79	7.45	2.58	0.51	0.53	1.1	-2.33194	5.84036e-05	0.000597989	LOC104929486	XP_019108470.2	PI-PLC X domain-containing protein 1 [Larimichthys crocea]	GO:0008081;GO:0006629	phosphoric diester hydrolase activity;lipid metabolic process	-	-	-	-	-	KOG4306	Glycosylphosphatidylinositol-specific phospholipase C	sp|Q9NUJ7|PLCX1_HUMAN	PI-PLC X domain-containing protein 1 OS=Homo sapiens OX=9606 GN=PLCXD1 PE=2 SV=1
gene11177	1013	3.45	7.42	5.41	0.35	0.57	1.81	-2.32966	0.000223977	0.00183932	LOC104926717	XP_019127589.1	G1/S-specific cyclin-D2 [Larimichthys crocea]	GO:0051301	cell division	K10151	CCND2	http://www.genome.jp/dbget-bin/www_bget?ko:K10151	Cell cycle;Cellular senescence;p53 signaling pathway;Focal adhesion;FoxO signaling pathway;Hedgehog signaling pathway;Hippo signaling pathway;JAK-STAT signaling pathway;PI3K-Akt signaling pathway;Wnt signaling pathway;MicroRNAs in cancer;Pathways in cancer;Transcriptional misregulation in cancer;Viral carcinogenesis;Epstein-Barr virus infection;Human T-cell leukemia virus 1 infection;Human papill…	ko04110,ko04218,ko04115,ko04510,ko04068,ko04340,ko04390,ko04630,ko04151,ko04310,ko05206,ko05200,ko05202,ko05203,ko05169,ko05166,ko05165,ko05162,ko04917	KOG0656	G1/S-specific cyclin D	sp|P49706|CCND2_CHICK	G1/S-specific cyclin-D2 OS=Gallus gallus OX=9031 GN=CCND2 PE=3 SV=1
gene16878	5418	1.38	2.63	0.73	0.16	0.09	0.7	-2.14083	0.000878447	0.00580514	myo5c	XP_027128897.1	unconventional myosin-Vc isoform X1 [Larimichthys crocea]	GO:0051015;GO:0016459;GO:0003779;GO:0003774;GO:0005524	actin filament binding;myosin complex;actin binding;cytoskeletal motor activity;ATP binding	K10357	MYO5	http://www.genome.jp/dbget-bin/www_bget?ko:K10357	Pathogenic Escherichia coli infection	ko05130	KOG0160	Myosin class V heavy chain	sp|Q9NQX4|MYO5C_HUMAN	Unconventional myosin-Vc OS=Homo sapiens OX=9606 GN=MYO5C PE=1 SV=2
gene12339	4589	0.4	0.96	0.64	0.06	0.04	0.19	-2.54851	0.000253796	0.00203892	LOC104927976	TMS09339.1	Sal-like protein 2 [Larimichthys crocea]	GO:0005525	GTP binding	-	-	-	-	-	-	-	sp|Q9Y467|SALL2_HUMAN	Sal-like protein 2 OS=Homo sapiens OX=9606 GN=SALL2 PE=1 SV=4
gene16488	3883	145.26	175.96	69.84	4.9	4.1	6.74	-4.28866	4.25431e-29	2.84878e-26	LOC104932413	XP_027145829.1	desmoplakin-like [Larimichthys crocea]	GO:0005737;GO:0016021;GO:0030054;GO:0050839;GO:0005856;GO:0098609;GO:0045104	cytoplasm;integral component of membrane;cell junction;cell adhesion molecule binding;cytoskeleton;cell-cell adhesion;intermediate filament cytoskeleton organization	K10381	DSP	http://www.genome.jp/dbget-bin/www_bget?ko:K10381	Arrhythmogenic right ventricular cardiomyopathy	ko05412	KOG0516	Dystonin, GAS (Growth-arrest-specific protein), and related proteins	sp|P15924|DESP_HUMAN;sp|E9Q557|DESP_MOUSE	Desmoplakin OS=Homo sapiens OX=9606 GN=DSP PE=1 SV=3;Desmoplakin OS=Mus musculus OX=10090 GN=Dsp PE=1 SV=1
gene2313	2694	1.13	1.78	1.26	0.38	0.19	0.62	-1.47099	0.00511264	0.0246346	LOC104940212	XP_027136976.1	nuclear receptor-binding protein-like [Larimichthys crocea]	GO:0004672;GO:0005524	protein kinase activity;ATP binding	K08875	NRBP	http://www.genome.jp/dbget-bin/www_bget?ko:K08875	-	-	-	-	sp|Q9UHY1|NRBP_HUMAN	Nuclear receptor-binding protein OS=Homo sapiens OX=9606 GN=NRBP1 PE=1 SV=1
gene14199	3385	4.67	3.73	1.27	0.72	0.1	0.52	-2.4596	0.000218521	0.00180469	ttk	XP_027142549.1	dual specificity protein kinase TTK [Larimichthys crocea]	GO:0051304;GO:0004712;GO:0005524	chromosome separation;protein serine/threonine/tyrosine kinase activity;ATP binding	K08866	TTK,MPS1	http://www.genome.jp/dbget-bin/www_bget?ko:K08866	Cell cycle	ko04110	-	-	sp|Q8AYG3|TTK_DANRE	Dual specificity protein kinase Ttk OS=Danio rerio OX=7955 GN=ttk PE=1 SV=2
gene23657	1565	2.88	3.37	1.75	0.24	0.12	0.65	-2.71692	1.41705e-05	0.000179493	LOC104940009	KAE8279238.1	Mitochondrial inner membrane protein OXA1L Oxidase assembly 1-like protein [Larimichthys crocea]	GO:0004843;GO:0032977;GO:0016579;GO:0006511;GO:0016021	thiol-dependent deubiquitinase;membrane insertase activity;protein deubiquitination;ubiquitin-dependent protein catabolic process;integral component of membrane	-	-	-	-	-	-	-	sp|Q24574|UBPE_DROME	Ubiquitin carboxyl-terminal hydrolase 47 OS=Drosophila melanogaster OX=7227 GN=Usp47 PE=1 SV=2
novel.6075	293	290	249.07	30750.8	337.1	297.94	353.57	-4.64182	0.00969122	0.041164	-	RXN03634.1	bcl-2 15 [Labeo rohita]	GO:0016021;GO:0006915;GO:0005576;GO:0016192;GO:0005882;GO:0005198;GO:0006886;GO:0030117;GO:0042981	integral component of membrane;apoptotic process;extracellular region;vesicle-mediated transport;intermediate filament;structural molecule activity;intracellular protein transport;membrane coat;regulation of apoptotic process	K00109	L2HGDH	http://www.genome.jp/dbget-bin/www_bget?ko:K00109	Butanoate metabolism	ko00650	-	-	-	-
gene16693	6483	10.78	14.89	23.99	4.08	2.72	5.7	-1.69197	0.000134767	0.00120759	uaca	XP_019131388.2	uveal autoantigen with coiled-coil domains and ankyrin repeats [Larimichthys crocea]	GO:1901222;GO:0097190	regulation of NIK/NF-kappaB signaling;apoptotic signaling pathway	-	-	-	-	-	-	-	sp|Q9GL21|UACA_CANLF	Uveal autoantigen with coiled-coil domains and ankyrin repeats OS=Canis lupus familiaris OX=9615 GN=UACA PE=2 SV=2
novel.20968	702	27.37	3.89	9.47	1.31	0.61	1.29	-3.25073	2.1833e-05	0.000260691	-	-	-	-	-	-	-	-	-	-	-	-	-	-
gene6215	1098	2.45	2.74	1.67	0.5	0.19	0.34	-2.30422	0.00143195	0.0087105	LOC104921414	KAE8289850.1	C-type lectin domain family 4 member C Blood dendritic cell antigen 2 [Larimichthys crocea]	GO:0030246;GO:0016021	carbohydrate binding;integral component of membrane	K06721	CLEC10A,CLECSF13,CLECSF14,CD301	http://www.genome.jp/dbget-bin/www_bget?ko:K06721	-	-	-	-	sp|P86854|PLCL_MYTGA	Perlucin-like protein OS=Mytilus galloprovincialis OX=29158 PE=1 SV=1
gene10528	1813	3.39	5.39	1.85	0.35	0.34	0.54	-2.71199	2.68191e-06	4.34577e-05	bok	KAE8294397.1	FERM, ARHGEF and pleckstrin domain-containing protein 2 FERM domain including RhoGEF [Larimichthys crocea]	GO:0006915;GO:0016020;GO:0005085;GO:0042981	apoptotic process;membrane;guanyl-nucleotide exchange factor activity;regulation of apoptotic process	K02561	BOK	http://www.genome.jp/dbget-bin/www_bget?ko:K02561	Apoptosis - fly;Apoptosis - multiple species	ko04214,ko04215	-	-	sp|Q6DC66|BOKA_DANRE	Bcl-2-related ovarian killer protein homolog A OS=Danio rerio OX=7955 GN=boka PE=2 SV=1
novel.19417	582	1.74	8.54	3.56	0.16	0.68	1.07	-2.47772	0.0103736	0.0434002	-	KAE8279188.1	Poly [ADP-ribose] polymerase 14 [Larimichthys crocea]	GO:0003950	NAD+ ADP-ribosyltransferase activity	-	-	-	-	-	-	-	-	-
gene9987	879	0.2	2.93	0.57	0	0	0.09	-4.8234	0.00649037	0.0298507	LOC104925459	XP_027138456.1	uncharacterized protein LOC104925459 [Larimichthys crocea]	GO:0016021;GO:0008289;GO:0005576;GO:0042157;GO:0006869	integral component of membrane;lipid binding;extracellular region;lipoprotein metabolic process;lipid transport	K14480	APOL	http://www.genome.jp/dbget-bin/www_bget?ko:K14480	-	-	-	-	-	-
gene18709	5225	8.48	12.76	5.34	0.95	0.7	2.72	-2.34331	8.16521e-08	2.05618e-06	LOC104934779	KAE8284746.1	Protein FAM102A [Larimichthys crocea]	-	-	-	-	-	-	-	-	-	sp|Q78T81|F102A_MOUSE	Protein FAM102A OS=Mus musculus OX=10090 GN=Fam102a PE=1 SV=1
gene16003	2631	0.3	0.59	0.32	0	0.02	0	-5.20335	0.000544387	0.00388584	LOC104931881	XP_010745291.3	magnesium transporter NIPA2 [Larimichthys crocea]	GO:0015095;GO:0016021	magnesium ion transmembrane transporter activity;integral component of membrane	K22733	NIPA,SLC57A2S	http://www.genome.jp/dbget-bin/www_bget?ko:K22733	-	-	-	-	sp|Q0D2K0|NIPA4_HUMAN	Magnesium transporter NIPA4 OS=Homo sapiens OX=9606 GN=NIPAL4 PE=1 SV=3
gene405	4598	1.27	2.91	1.18	0.07	0.05	0.16	-3.95291	5.9086e-11	3.08843e-09	trim66	KAE8297011.1	Tripartite motif-containing protein 66 [Larimichthys crocea]	GO:0008270;GO:0005085;GO:0016021;GO:0005634;GO:0046872	zinc ion binding;guanyl-nucleotide exchange factor activity;integral component of membrane;nucleus;metal ion binding	K12032	TRIM66	http://www.genome.jp/dbget-bin/www_bget?ko:K12032	-	-	-	-	sp|Q924W6|TRI66_MOUSE	Tripartite motif-containing protein 66 OS=Mus musculus OX=10090 GN=Trim66 PE=1 SV=3
gene16315	3103	0.06	0.32	0.07	0	0	0	-4.99967	0.0105747	0.0441151	LOC104932220	XP_010745693.3	riboflavin-binding protein [Larimichthys crocea]	-	-	K13649	FOLR	http://www.genome.jp/dbget-bin/www_bget?ko:K13649	Endocytosis;Antifolate resistance	ko04144,ko01523	-	-	sp|P02752|RBP_CHICK	Riboflavin-binding protein OS=Gallus gallus OX=9031 PE=1 SV=2
gene13509	901	137.37	266.28	54.16	12.86	7.83	15.35	-3.39355	5.13568e-10	2.24412e-08	LOC104929207	XP_010741969.1;KAF3845985.1;KAE8283874.1	DELTA-sagatoxin-Srs1a [Larimichthys crocea];hypothetical protein F7725_003063 [Dissostichus mawsoni];DELTA-thalatoxin-Avl1a [Larimichthys crocea]	GO:0005886;GO:0052331;GO:0015267;GO:0044218;GO:0046930;GO:0006812;GO:0046931	plasma membrane;hemolysis in other organism involved in symbiotic interaction;channel activity;other organism cell membrane;pore complex;cation transport;pore complex assembly	-	-	-	-	-	-	-	sp|Q5R231|ACTP1_ACTVL;sp|Q86FQ0|ACTP1_SAGRO	DELTA-thalatoxin-Avl1a OS=Actineria villosa OX=227975 PE=1 SV=1;DELTA-sagatoxin-Srs1a OS=Sagartia rosea OX=396345 PE=1 SV=1
gene14333	929	23.84	21.16	6.73	4.23	1.44	4.59	-1.94179	0.000458251	0.00336006	gcsh	XP_010743082.2	glycine cleavage system H protein, mitochondrial [Larimichthys crocea]	GO:0005739;GO:0019464;GO:0005960	mitochondrion;glycine decarboxylation via glycine cleavage system;glycine cleavage complex	K02437	gcvH,GCSH	http://www.genome.jp/dbget-bin/www_bget?ko:K02437	Glycine, serine and threonine metabolism;Glyoxylate and dicarboxylate metabolism	ko00260,ko00630	KOG3373	Glycine cleavage system H protein (lipoate-binding)	sp|P11183|GCSH_CHICK	Glycine cleavage system H protein, mitochondrial OS=Gallus gallus OX=9031 GN=GCSH PE=1 SV=2
gene8329	1983	1.67	3.93	1.13	0.06	0.03	0	-5.67589	1.20326e-07	2.85829e-06	LOC104923660	XP_027131213.1	keratin, type I cytoskeletal 18-like isoform X2 [Larimichthys crocea]	GO:0005198;GO:0005882	structural molecule activity;intermediate filament	K07604	KRT1	http://www.genome.jp/dbget-bin/www_bget?ko:K07604	Staphylococcus aureus infection;Estrogen signaling pathway	ko05150,ko04915	-	-	sp|O57611|K1C18_SCYST	Keratin, type I cytoskeletal 18 OS=Scyliorhinus stellaris OX=68454 GN=krt18 PE=1 SV=1
gene5884	3596	1.62	3.52	1	0.17	0.01	0.2	-3.05492	2.33679e-05	0.000276014	ppm1h	XP_010731740.1	protein phosphatase 1H [Larimichthys crocea]	GO:0004722	protein serine/threonine phosphatase activity	K17503	PPM1H,ARHCL1	http://www.genome.jp/dbget-bin/www_bget?ko:K17503	-	-	KOG1323	Serine/threonine phosphatase	sp|Q3UYC0|PPM1H_MOUSE	Protein phosphatase 1H OS=Mus musculus OX=10090 GN=Ppm1h PE=1 SV=1
gene20635	1436	2.3	5.41	1.66	0.13	0.14	0.82	-2.89619	0.000119959	0.00109148	LOC104936803	XP_027144018.1	uncharacterized protein LOC104936803 [Larimichthys crocea]	-	-	-	-	-	-	-	-	-	-	-
novel.13131	1503	1.73	2.33	1.18	0.21	0.3	0.45	-2.0315	0.0020435	0.0117018	-	XP_019118289.2	cyclic GMP-AMP synthase [Larimichthys crocea]	-	-	K17834	MB21D1	http://www.genome.jp/dbget-bin/www_bget?ko:K17834	Shigellosis;Coronavirus disease - COVID-19;Herpes simplex virus 1 infection;Human cytomegalovirus infection;Human immunodeficiency virus 1 infection;Cytosolic DNA-sensing pathway	ko05131,ko05171,ko05168,ko05163,ko05170,ko04623	-	-	-	-
gene8824	6203	0.5	1.41	2.29	0.01	0	0.06	-5.89467	2.0384e-10	9.73092e-09	kcnh7	XP_019110726.2;XP_019110727.2	potassium voltage-gated channel subfamily H member 7 isoform X1 [Larimichthys crocea];potassium voltage-gated channel subfamily H member 7 isoform X2 [Larimichthys crocea]	-	-	K04910	KCNH7,KV11.3	http://www.genome.jp/dbget-bin/www_bget?ko:K04910	-	-	KOG0498	K+-channel ERG and related proteins, contain PAS/PAC sensor domain	sp|Q9NS40|KCNH7_HUMAN	Potassium voltage-gated channel subfamily H member 7 OS=Homo sapiens OX=9606 GN=KCNH7 PE=1 SV=2
gene22760	2047	1	2.12	0.78	0.17	0.12	0.57	-1.9241	0.00665014	0.0304498	phf19	XP_027140190.1	PHD finger protein 19 isoform X1 [Larimichthys crocea]	GO:0046872;GO:0005634	metal ion binding;nucleus	K11486	PHF19,PCL3	http://www.genome.jp/dbget-bin/www_bget?ko:K11486	-	-	-	-	sp|Q5T6S3|PHF19_HUMAN	PHD finger protein 19 OS=Homo sapiens OX=9606 GN=PHF19 PE=1 SV=1
gene20275	3316	59.53	49.59	57.33	3.08	3.44	1.36	-3.79636	8.64786e-12	5.49383e-10	LOC104936459	XP_027129620.1;XP_027129619.1	periostin isoform X3 [Larimichthys crocea];periostin isoform X2 [Larimichthys crocea]	GO:0007155	cell adhesion	K24790	POSTN	http://www.genome.jp/dbget-bin/www_bget?ko:K24790	-	-	KOG1437	Fasciclin and related adhesion glycoproteins	sp|Q62009|POSTN_MOUSE	Periostin OS=Mus musculus OX=10090 GN=Postn PE=1 SV=2
novel.9578	1237	12.02	7.7	9.17	0.27	0.6	2.49	-2.9252	1.42329e-06	2.49918e-05	-	TKS75557.1	hypothetical protein D9C73_010282 [Collichthys lucidus]	GO:0016891;GO:0003723;GO:0016021	endoribonuclease activity, producing 5'-phosphomonoesters;RNA binding;integral component of membrane	-	-	-	-	-	-	-	-	-
gene1657	4799	4.17	4.06	3.93	1.17	0.61	2.02	-1.38488	0.000106719	0.000988809	LOC104932604	XP_019205713.1;XP_027144586.1;XP_027144587.1	LOW QUALITY PROTEIN: zinc finger protein 385A [Oreochromis niloticus];zinc finger protein 385A isoform X1 [Larimichthys crocea];zinc finger protein 385A isoform X2 [Larimichthys crocea]	GO:0008270;GO:0003676	zinc ion binding;nucleic acid binding	-	-	-	-	-	-	-	sp|Q8VD12|Z385A_MOUSE;sp|Q96PM9|Z385A_HUMAN	Zinc finger protein 385A OS=Mus musculus OX=10090 GN=Znf385a PE=1 SV=2;Zinc finger protein 385A OS=Homo sapiens OX=9606 GN=ZNF385A PE=1 SV=2
gene22475	1915	24.54	22.67	25.76	4.75	2.2	10.29	-1.85658	4.74233e-06	6.98549e-05	LOC104938756	XP_023249226.1	peripheral plasma membrane protein CASK isoform X11 [Seriola lalandi dorsalis]	GO:0004672;GO:0005524	protein kinase activity;ATP binding	K06103	CASK	http://www.genome.jp/dbget-bin/www_bget?ko:K06103	-	-	KOG0609	Calcium/calmodulin-dependent serine protein kinase/membrane-associated guanylate kinase	sp|O14936|CSKP_HUMAN	Peripheral plasma membrane protein CASK OS=Homo sapiens OX=9606 GN=CASK PE=1 SV=3
gene21255	2387	49.53	35.07	33.78	17.08	8.45	19.65	-1.13217	0.000595058	0.00418563	LOC104937459	TKS87065.1;KAE8290261.1;XP_010751988.1;TNN65603.1;TMS21438.1	Serine/arginine-rich splicing factor 4 [Collichthys lucidus];Desumoylating isopeptidase 2 [Larimichthys crocea];serine/arginine-rich splicing factor 5 isoform X1 [Larimichthys crocea];hypothetical protein EYF80_024132 [Liparis tanakae];Serine/arginine-rich splicing factor 4, partial [Larimichthys crocea]	GO:0008233;GO:0005634;GO:0003723	peptidase activity;nucleus;RNA binding	K12893	SRSF4_5_6,SFRS4_5_6	http://www.genome.jp/dbget-bin/www_bget?ko:K12893	Spliceosome;Herpes simplex virus 1 infection	ko03040,ko05168	KOG0106	Alternative splicing factor SRp55/B52/SRp75 (RRM superfamily)	sp|O35326|SRSF5_MOUSE	Serine/arginine-rich splicing factor 5 OS=Mus musculus OX=10090 GN=Srsf5 PE=1 SV=2
gene20383	2953	0.53	0.22	0.54	0.02	0.02	0.08	-3.16384	0.0021964	0.0124129	LOC104936553	XP_027130520.1	calpain-3 [Larimichthys crocea]	GO:0045214;GO:0005737;GO:0004198;GO:0005509	sarcomere organization;cytoplasm;calcium-dependent cysteine-type endopeptidase activity;calcium ion binding	K08573	CAPN3	http://www.genome.jp/dbget-bin/www_bget?ko:K08573	-	-	KOG0045	Cytosolic Ca2+-dependent cysteine protease (calpain), large subunit (EF-Hand protein superfamily)	sp|P43368|CAN3_PIG	Calpain-3 OS=Sus scrofa OX=9823 GN=CAPN3 PE=2 SV=2
gene21543	1458	0.35	0.95	0.17	0	0	0	-5.42281	0.00259064	0.0142004	LOC104937773	XP_020508349.2	rap guanine nucleotide exchange factor-like 1 [Labrus bergylta]	GO:0005085;GO:0007264	guanyl-nucleotide exchange factor activity;small GTPase mediated signal transduction	-	-	-	-	-	-	-	sp|Q9UHV5|RPGFL_HUMAN	Rap guanine nucleotide exchange factor-like 1 OS=Homo sapiens OX=9606 GN=RAPGEFL1 PE=1 SV=2
gene22055	751	59.19	68.56	31.29	11.67	5.81	19.53	-1.76685	1.56755e-05	0.000195656	LOC104938316	-	-	-	-	-	-	-	-	-	-	-	-	-
gene23534	685	12.8	5.09	6.86	0.12	0.38	0.27	-4.54934	1.44791e-07	3.39068e-06	LOC104939885	KAE8283585.1	hypothetical protein D5F01_LYC18988 [Larimichthys crocea]	GO:0009395;GO:0004620	phospholipid catabolic process;phospholipase activity	K16342	PLA2G4,CPLA2	http://www.genome.jp/dbget-bin/www_bget?ko:K16342	Necroptosis;MAPK signaling pathway;Phospholipase D signaling pathway;Ras signaling pathway;VEGF signaling pathway;Choline metabolism in cancer;Arachidonic acid metabolism;Ether lipid metabolism;Glycerophospholipid metabolism;Linoleic acid metabolism;alpha-Linolenic acid metabolism;Vascular smooth muscle contraction;GnRH signaling pathway;Ovarian steroidogenesis;Oxytocin signaling pathway;Fc epsil…	ko04217,ko04010,ko04072,ko04014,ko04370,ko05231,ko00590,ko00565,ko00564,ko00591,ko00592,ko04270,ko04912,ko04913,ko04921,ko04664,ko04666,ko04611,ko04724,ko04730,ko04726,ko04750	-	-	sp|Q9UP65|PA24C_HUMAN	Cytosolic phospholipase A2 gamma OS=Homo sapiens OX=9606 GN=PLA2G4C PE=1 SV=2
gene4003	2209	0.58	0.94	0.21	0	0	0	-6.36878	4.50305e-05	0.000477397	pou2f3	XP_019121328.1	POU domain, class 2, transcription factor 3 isoform X2 [Larimichthys crocea]	GO:0005634;GO:0007275;GO:0000981;GO:0003677	nucleus;multicellular organism development;DNA-binding transcription factor activity, RNA polymerase II-specific;DNA binding	K09364	POU2F,OTF	http://www.genome.jp/dbget-bin/www_bget?ko:K09364	Lipid and atherosclerosis;Herpes simplex virus 1 infection	ko05417,ko05168	-	-	sp|P42571|PO2F3_RAT	POU domain, class 2, transcription factor 3 OS=Rattus norvegicus OX=10116 GN=Pou2f3 PE=2 SV=1
gene12489	1608	0.98	1.45	0.78	0.12	0.04	0.25	-2.69128	0.00156943	0.00939234	LOC104928155	TKS89335.1	Nuclear factor 7, ovary [Collichthys lucidus]	GO:0008270	zinc ion binding	K12012	TRIM35	http://www.genome.jp/dbget-bin/www_bget?ko:K12012	-	-	-	-	sp|Q92021|NF7B_XENLA	Nuclear factor 7, brain OS=Xenopus laevis OX=8355 PE=1 SV=1
gene8430	3949	11.2	15.59	10.71	3.07	3.14	5.79	-1.31057	3.24176e-05	0.000363429	fzd6	TMS10359.1	Frizzled-6 [Larimichthys crocea]	GO:0009986;GO:0001525;GO:0048701;GO:0016021;GO:0005886;GO:0042813;GO:0007275;GO:0030659	cell surface;angiogenesis;embryonic cranial skeleton morphogenesis;integral component of membrane;plasma membrane;Wnt-activated receptor activity;multicellular organism development;cytoplasmic vesicle membrane	K02376	FZD6	http://www.genome.jp/dbget-bin/www_bget?ko:K02376	Signaling pathways regulating pluripotency of stem cells;Hippo signaling pathway;Wnt signaling pathway;mTOR signaling pathway;Pathways in cancer;Proteoglycans in cancer;Basal cell carcinoma;Breast cancer;Gastric cancer;Hepatocellular carcinoma;Cushing syndrome;Human papillomavirus infection;Alzheimer disease;Pathways of neurodegeneration - multiple diseases;Melanogenesis	ko04550,ko04390,ko04310,ko04150,ko05200,ko05205,ko05217,ko05224,ko05226,ko05225,ko04934,ko05165,ko05010,ko05022,ko04916	-	-	sp|Q8WMU5|FZD6_CANLF	Frizzled-6 OS=Canis lupus familiaris OX=9615 GN=FZD6 PE=2 SV=1
gene8039	904	17.72	30.19	15.41	4.47	3.24	12.01	-1.40938	0.00136915	0.00839655	LOC104923334	-	-	-	-	-	-	-	-	-	-	-	-	-
gene2050	2903	0.36	0.98	0.79	0.1	0	0.15	-2.87691	0.00146038	0.00883576	trpc1	XP_019130272.1	short transient receptor potential channel 1 [Larimichthys crocea]	GO:0046847;GO:0005262;GO:0001525;GO:0016021;GO:0001570	filopodium assembly;calcium channel activity;angiogenesis;integral component of membrane;vasculogenesis	K04964	TRPC1	http://www.genome.jp/dbget-bin/www_bget?ko:K04964	Axon guidance;Pancreatic secretion;GnRH secretion;Glutamatergic synapse;Serotonergic synapse	ko04360,ko04972,ko04929,ko04724,ko04726	KOG3609	Receptor-activated Ca2+-permeable cation channels (STRPC family)	sp|Q61056|TRPC1_MOUSE	Short transient receptor potential channel 1 OS=Mus musculus OX=10090 GN=Trpc1 PE=1 SV=5
novel.21683	297	51.91	162.82	140.35	0	0	2.77	-6.6927	7.16518e-08	1.82263e-06	-	XP_027147458.1	putative ferric-chelate reductase 1 [Larimichthys crocea]	-	-	-	-	-	-	-	-	-	-	-
gene23503	655	34.81	79.03	21.44	6.72	3.68	11.45	-2.28477	1.2916e-05	0.000165463	LOC104939853	XP_027146000.1	protein PLANT CADMIUM RESISTANCE 2-like [Larimichthys crocea]	-	-	-	-	-	-	-	-	-	sp|Q9JI48|PLAC8_MOUSE	Placenta-specific gene 8 protein OS=Mus musculus OX=10090 GN=Plac8 PE=1 SV=1
gene18938	1346	1.38	2.01	2	0.38	0.34	0.26	-1.96838	0.00538497	0.0257076	LOC104935010	TMS18531.1	C-type lectin domain family 4 member M [Larimichthys crocea]	GO:0016021;GO:0030246	integral component of membrane;carbohydrate binding	-	-	-	-	-	-	-	sp|Q91ZW8|C209D_MOUSE	CD209 antigen-like protein D OS=Mus musculus OX=10090 GN=Cd209d PE=2 SV=1
gene3440	1738	6.09	7.67	5.33	0.68	1.16	3.93	-1.57022	0.0017037	0.0100574	LOC104918379	XP_027134631.1	uncharacterized protein LOC104918379 [Larimichthys crocea]	-	-	-	-	-	-	-	-	-	-	-
gene14240	1044	0.77	0.56	0.72	0	0	0	-5.32446	0.0021124	0.0120232	nkx2-1	XP_010742942.1	homeobox protein Nkx-2.1 [Larimichthys crocea]	GO:0000981;GO:0003677;GO:0007275;GO:0005634;GO:0021854	DNA-binding transcription factor activity, RNA polymerase II-specific;DNA binding;multicellular organism development;nucleus;hypothalamus development	K09342	NKX2-1,TITF1	http://www.genome.jp/dbget-bin/www_bget?ko:K09342	-	-	KOG0842	Transcription factor tinman/NKX2-3, contains HOX domain	sp|P23441|NKX21_RAT	Homeobox protein Nkx-2.1 OS=Rattus norvegicus OX=10116 GN=Nkx2-1 PE=1 SV=1
novel.21643	591	14.08	6.6	2.16	0.64	0.66	1.22	-2.75555	0.000915785	0.00600569	-	TMS20421.1	GTPase IMAP family member 8 [Larimichthys crocea]	-	-	-	-	-	-	-	-	-	-	-
gene15067	1569	0.2	0.75	0.16	0	0	0	-5.11776	0.00716084	0.0322811	LOC104930870	XP_010744062.3	tripartite motif-containing protein 16 [Larimichthys crocea]	GO:0008270;GO:0016874	zinc ion binding;ligase activity	K12006	TRIM16	http://www.genome.jp/dbget-bin/www_bget?ko:K12006	-	-	-	-	sp|Q99PP9|TRI16_MOUSE	Tripartite motif-containing protein 16 OS=Mus musculus OX=10090 GN=Trim16 PE=1 SV=2
gene19534	1291	4.2	4.76	2.24	0.71	0.41	0.77	-2.14971	0.000116577	0.00106462	ing2	XP_010749837.1	inhibitor of growth protein 2 [Larimichthys crocea]	GO:2000772;GO:0008285;GO:0005634;GO:0003682;GO:0006325;GO:0046872;GO:0042981	regulation of cellular senescence;negative regulation of cell population proliferation;nucleus;chromatin binding;chromatin organization;metal ion binding;regulation of apoptotic process	K19198	ING2	http://www.genome.jp/dbget-bin/www_bget?ko:K19198	-	-	KOG1973	Chromatin remodeling protein, contains PHD Zn-finger	sp|Q9H160|ING2_HUMAN	Inhibitor of growth protein 2 OS=Homo sapiens OX=9606 GN=ING2 PE=1 SV=2
novel.18368	1612	0.84	1.89	0.98	0.27	0.04	0.21	-2.46967	0.00327206	0.0171646	-	-	-	-	-	-	-	-	-	-	-	-	-	-
gene23185	1245	61.68	81.03	24.75	16.57	16.02	26.82	-1.27922	0.00217908	0.0123344	LOC104939507	XP_010754360.2;KAE8285987.1	transmembrane protein 109 isoform X2 [Larimichthys crocea];hypothetical protein D5F01_LYC15667 [Larimichthys crocea]	GO:0060548;GO:0016021;GO:0071480	negative regulation of cell death;integral component of membrane;cellular response to gamma radiation	-	-	-	-	-	-	-	-	-
gene8523	2301	0.47	1.01	0.55	0.05	0.03	0.11	-3.12395	0.000787638	0.00530718	LOC104923871	XP_019124330.2	P2Y purinoceptor 1-like [Larimichthys crocea]	GO:0016021;GO:0004930	integral component of membrane;G protein-coupled receptor activity	K04270	P2RY1	http://www.genome.jp/dbget-bin/www_bget?ko:K04270	Rap1 signaling pathway;Neuroactive ligand-receptor interaction;Platelet activation;Taste transduction	ko04015,ko04080,ko04611,ko04742	-	-	sp|P49650|P2RY1_MOUSE	P2Y purinoceptor 1 OS=Mus musculus OX=10090 GN=P2ry1 PE=2 SV=1
gene4095	3178	0.8	2.46	0.9	0.04	0.27	0.15	-2.60471	0.00141271	0.00861889	ndnf	KAF1386166.1	hypothetical protein PFLUV_G00115330 [Perca fluviatilis]	-	-	-	-	-	-	-	-	-	sp|F1QPX0|NDNF_DANRE	Protein NDNF OS=Danio rerio OX=7955 GN=ndnf PE=3 SV=2
novel.18150	1272	0.77	2.26	1.87	0.1	0.16	0.06	-3.44641	0.000432511	0.0032122	Pcolce	XP_027143514.1	procollagen C-endopeptidase enhancer 2 isoform X2 [Larimichthys crocea]	GO:0005615;GO:0016504;GO:0005576;GO:0008201;GO:0005518	extracellular space;peptidase activator activity;extracellular region;heparin binding;collagen binding	K24361	PCOLCE	http://www.genome.jp/dbget-bin/www_bget?ko:K24361	-	-	KOG3714	Meprin A metalloprotease	sp|O08628|PCOC1_RAT	Procollagen C-endopeptidase enhancer 1 OS=Rattus norvegicus OX=10116 GN=Pcolce PE=1 SV=1
gene14868	1744	3.99	7.61	5.17	1.02	1.28	2.17	-1.52955	0.000753731	0.00511348	LOC104930665	XP_010743824.3	G protein-coupled receptor kinase 5 [Larimichthys crocea]	GO:0001947;GO:0005886;GO:1902017;GO:0035469;GO:0007165;GO:0005524;GO:0032007;GO:0004703	heart looping;plasma membrane;regulation of cilium assembly;determination of pancreatic left/right asymmetry;signal transduction;ATP binding;negative regulation of TOR signaling;G protein-coupled receptor kinase activity	K08291	GRK4_5_6	http://www.genome.jp/dbget-bin/www_bget?ko:K08291	Endocytosis;Hedgehog signaling pathway - fly;Morphine addiction;Chemokine signaling pathway	ko04144,ko04341,ko05032,ko04062	KOG0986	G protein-coupled receptor kinase	sp|P34947|GRK5_HUMAN	G protein-coupled receptor kinase 5 OS=Homo sapiens OX=9606 GN=GRK5 PE=1 SV=1
gene5371	4018	2.91	4.98	1.33	0.3	0.46	1.53	-1.74036	0.00288847	0.0155104	abtb2	XP_010731037.2	ankyrin repeat and BTB/POZ domain-containing protein 2 [Larimichthys crocea]	GO:0046982	protein heterodimerization activity	K10521	ABTB2	http://www.genome.jp/dbget-bin/www_bget?ko:K10521	-	-	-	-	sp|Q7TQI7|ABTB2_MOUSE	Ankyrin repeat and BTB/POZ domain-containing protein 2 OS=Mus musculus OX=10090 GN=Abtb2 PE=1 SV=1
gene12729	2383	2.88	2.51	3.5	0.06	0.42	0.58	-2.73466	2.17402e-05	0.000259709	apcdd1l	XP_027134629.1	protein APCDD1-like [Larimichthys crocea]	GO:0030178;GO:0017147;GO:0016021;GO:0005886	negative regulation of Wnt signaling pathway;Wnt-protein binding;integral component of membrane;plasma membrane	-	-	-	-	-	-	-	sp|Q8NCL9|APCDL_HUMAN	Protein APCDD1-like OS=Homo sapiens OX=9606 GN=APCDD1L PE=1 SV=1
gene9181	1959	6.23	8.65	4.47	1.33	1.46	3.32	-1.32303	0.00132355	0.0081626	liph	TMS13742.1	Lipase member H [Larimichthys crocea]	-	-	K19404	LIPH_I	http://www.genome.jp/dbget-bin/www_bget?ko:K19404	-	-	-	-	sp|Q6DBU8|LIPH_DANRE	Lipase member H OS=Danio rerio OX=7955 GN=liph PE=2 SV=1
gene10503	3718	8.55	9.32	5.57	1.1	0.5	3.14	-2.09103	4.39797e-06	6.57202e-05	hook1	KAE8294373.1	Protein Hook-like protein 1 [Larimichthys crocea]	GO:0008017;GO:0031122;GO:0005874;GO:0030705;GO:0005737	microtubule binding;cytoplasmic microtubule organization;microtubule;cytoskeleton-dependent intracellular transport;cytoplasm	K16612	HOOK1	http://www.genome.jp/dbget-bin/www_bget?ko:K16612	-	-	-	-	sp|Q5TZ80|HOOK1_DANRE	Protein Hook homolog 1 OS=Danio rerio OX=7955 GN=hook1 PE=2 SV=1
gene7416	529	39.73	164.43	19.85	0.99	0.41	3.23	-5.31494	2.53598e-11	1.44773e-09	LOC104922679	XP_027132334.1	fish-egg lectin [Larimichthys crocea]	GO:0030246	carbohydrate binding	-	-	-	-	-	-	-	-	-
gene6515	5174	4.43	4.94	2.37	1.05	0.46	1.91	-1.48928	0.000564283	0.00399791	LOC104921702	XP_010732620.2	RNA polymerase II elongation factor ELL [Larimichthys crocea]	GO:0008023;GO:0006368;GO:0003746	transcription elongation factor complex;transcription elongation from RNA polymerase II promoter;translation elongation factor activity	K15183	ELL	http://www.genome.jp/dbget-bin/www_bget?ko:K15183	-	-	-	-	sp|O08856|ELL_MOUSE	RNA polymerase II elongation factor ELL OS=Mus musculus OX=10090 GN=Ell PE=2 SV=2
gene19702	8776	19.78	22.81	11.58	3.79	2.76	9.41	-1.47716	6.924e-05	0.000690616	helz2	XP_010750041.1	helicase with zinc finger domain 2 isoform X1 [Larimichthys crocea]	GO:0003723;GO:0004386;GO:0004540;GO:0005524;GO:0004672	RNA binding;helicase activity;ribonuclease activity;ATP binding;protein kinase activity	K25165	HELZ2	http://www.genome.jp/dbget-bin/www_bget?ko:K25165	-	-	-	-	sp|E9QAM5|HELZ2_MOUSE;sp|Q9BYK8|HELZ2_HUMAN	Helicase with zinc finger domain 2 OS=Mus musculus OX=10090 GN=Helz2 PE=1 SV=1;Helicase with zinc finger domain 2 OS=Homo sapiens OX=9606 GN=HELZ2 PE=1 SV=6
novel.21635	649	3.81	1.86	0.37	0	0	0	-5.78326	0.00103928	0.0066604	-	XP_027142501.1	BOLA class I histocompatibility antigen, alpha chain BL3-6-like [Larimichthys crocea]	-	-	-	-	-	-	-	-	-	-	-
gene10662	3803	6.23	8.02	5.01	1.76	1.31	3.81	-1.17378	0.00076823	0.00519762	LOC104926159	XP_019113096.1	tyrosine-protein kinase yes [Larimichthys crocea]	GO:0004715;GO:0004714;GO:0005524	non-membrane spanning protein tyrosine kinase activity;transmembrane receptor protein tyrosine kinase activity;ATP binding	K05705	YES1	http://www.genome.jp/dbget-bin/www_bget?ko:K05705	Adherens junction	ko04520	-	-	sp|A1A5H8|YES_DANRE	Tyrosine-protein kinase yes OS=Danio rerio OX=7955 GN=yes1 PE=1 SV=1
gene13707	4179	1.09	2.08	0.53	0.18	0.08	0.11	-2.84234	2.49533e-05	0.000291486	LOC104929429	KAE8299004.1;XP_027146726.1	Guanine nucleotide exchange factor DBS DBL&apos;s big sister [Larimichthys crocea];guanine nucleotide exchange factor DBS [Larimichthys crocea]	GO:0035556;GO:0005085	intracellular signal transduction;guanyl-nucleotide exchange factor activity	K20685	MCF2,ARHGEF14_21_22	http://www.genome.jp/dbget-bin/www_bget?ko:K20685	-	-	-	-	sp|Q63406|MCF2L_RAT	Guanine nucleotide exchange factor DBS OS=Rattus norvegicus OX=10116 GN=Mcf2l PE=1 SV=3
gene18541	898	1.52	2.67	2.43	0.25	0.34	0.8	-1.95019	0.012182	0.049269	LOC104934598	XP_019120550.2	uncharacterized protein LOC109139890 isoform X1 [Larimichthys crocea]	-	-	-	-	-	-	-	-	-	-	-
gene849	889	2.61	13.19	7.39	0.42	0.09	1.18	-3.59101	8.40168e-06	0.000114499	LOC104923759	KAE8285171.1	Protein AMBP Alpha-1-microglobulin Inter-alpha-trypsin inhibitor light chain [Larimichthys crocea]	GO:0005576	extracellular region	K23620	AMBP	http://www.genome.jp/dbget-bin/www_bget?ko:K23620	-	-	-	-	sp|P36992|AMBP_PLEPL	Protein AMBP (Fragment) OS=Pleuronectes platessa OX=8262 PE=2 SV=1
gene1705	3309	6.5	9.11	2.37	0.38	0.16	0.59	-3.65859	3.22307e-11	1.80259e-09	kiaa1324	TMS01235.1	UPF0577 protein [Larimichthys crocea]	GO:0016021;GO:0004707;GO:0005524;GO:0005886;GO:0106310;GO:0106311	integral component of membrane;MAP kinase activity;ATP binding;plasma membrane;protein serine kinase activity;protein serine/threonine kinase activity	-	-	-	-	-	-	-	sp|Q6UXG2|ELAP1_HUMAN	Endosome/lysosome-associated apoptosis and autophagy regulator 1 OS=Homo sapiens OX=9606 GN=ELAPOR1 PE=1 SV=2
gene10230	3690	1.86	4.69	2.21	0.77	0.29	1.16	-1.66601	0.00131372	0.00811468	LOC104925700	XP_027141691.1	coronin-7 isoform X1 [Larimichthys crocea]	GO:0005829;GO:0000139	cytosol;Golgi membrane	K18619	CORO7	http://www.genome.jp/dbget-bin/www_bget?ko:K18619	-	-	KOG0303	Actin-binding protein Coronin, contains WD40 repeats	sp|Q0V8F1|CORO7_BOVIN	Coronin-7 OS=Bos taurus OX=9913 GN=CORO7 PE=2 SV=1
gene1395	2161	2.01	4.42	1.76	0.37	0.11	0.15	-3.18454	4.49717e-06	6.68398e-05	pyroxd2	XP_010742927.3	pyridine nucleotide-disulfide oxidoreductase domain-containing protein 2 [Larimichthys crocea]	GO:0016491	oxidoreductase activity	-	-	-	-	-	-	-	sp|Q3MHH6|PYRD2_BOVIN	Pyridine nucleotide-disulfide oxidoreductase domain-containing protein 2 OS=Bos taurus OX=9913 GN=PYROXD2 PE=2 SV=1
gene1762	2342	13.41	19	6.6	1.34	0.52	3.87	-2.61081	1.7751e-06	3.02268e-05	LOC104934074	XP_010747963.1	ras-related protein Rab-19 [Larimichthys crocea]	GO:0005525;GO:0003924	GTP binding;GTPase activity	K17047	RAB19	http://www.genome.jp/dbget-bin/www_bget?ko:K17047	-	-	KOG0084	GTPase Rab1/YPT1, small G protein superfamily, and related GTP-binding proteins	sp|A4D1S5|RAB19_HUMAN	Ras-related protein Rab-19 OS=Homo sapiens OX=9606 GN=RAB19 PE=1 SV=2
gene4504	3242	10.35	11.98	5.62	1.7	1.54	4.34	-1.60908	3.61242e-05	0.000397961	LOC104919517	XP_010729865.2;KAE8293151.1	DENN domain-containing protein 2C isoform X1 [Larimichthys crocea];DENN domain-containing protein 2C [Larimichthys crocea]	GO:0005085	guanyl-nucleotide exchange factor activity	K20161	DENND2	http://www.genome.jp/dbget-bin/www_bget?ko:K20161	-	-	-	-	sp|Q68D51|DEN2C_HUMAN	DENN domain-containing protein 2C OS=Homo sapiens OX=9606 GN=DENND2C PE=1 SV=2
novel.17880	1048	25.66	22.76	10.17	1.12	0.07	1.01	-4.46657	2.29673e-12	1.66093e-10	-	KAE8277325.1	hypothetical protein D5F01_LYC24789 [Larimichthys crocea]	GO:0016021	integral component of membrane	-	-	-	-	-	-	-	-	-
gene8938	7399	4.57	4.6	3.58	0.8	0.41	1.23	-2.05907	1.1926e-09	4.76776e-08	sorl1	XP_019114921.1;KAE8295670.1	sortilin-related receptor isoform X1 [Larimichthys crocea];Sortilin-related receptor Low-density lipoprotein receptor relative with 11 ligand-binding repeats [Larimichthys crocea]	GO:0030658;GO:0005789;GO:0005576;GO:0005886;GO:0016021;GO:0031901;GO:0006897;GO:0000139;GO:0055038;GO:0032585	transport vesicle membrane;endoplasmic reticulum membrane;extracellular region;plasma membrane;integral component of membrane;early endosome membrane;endocytosis;Golgi membrane;recycling endosome membrane;multivesicular body membrane	K24498	SORL1	http://www.genome.jp/dbget-bin/www_bget?ko:K24498	-	-	KOG1215	Low-density lipoprotein receptors containing Ca2+-binding EGF-like domains	sp|Q95209|SORL_RABIT;sp|Q92673|SORL_HUMAN	Sortilin-related receptor OS=Oryctolagus cuniculus OX=9986 GN=SORL1 PE=1 SV=1;Sortilin-related receptor OS=Homo sapiens OX=9606 GN=SORL1 PE=1 SV=2
gene15809	1595	50.22	64.52	43.1	10.75	9.01	17.17	-1.71739	1.29967e-08	4.01003e-07	micu2	TKS83756.1	Calcium uptake protein 2, mitochondrial EF-hand domain-containing family member A1 [Collichthys lucidus]	GO:0006851;GO:0005509	mitochondrial calcium ion transmembrane transport;calcium ion binding	K22828	MICU2	http://www.genome.jp/dbget-bin/www_bget?ko:K22828	-	-	KOG2643	Ca2+ binding protein, contains EF-hand motifs	sp|Q8IYU8|MICU2_HUMAN	Calcium uptake protein 2, mitochondrial OS=Homo sapiens OX=9606 GN=MICU2 PE=1 SV=2
novel.19852	372	20.49	28.8	2.43	1.03	2.26	1.18	-2.99483	0.00496405	0.0240448	-	TMS05901.1	hypothetical protein E3U43_005151 [Larimichthys crocea]	-	-	-	-	-	-	-	-	-	-	-
gene691	1769	0.4	1.37	0.18	0.03	0	0.04	-4.37669	0.0030396	0.0161456	LOC104922226	XP_010733299.1	homeobox protein MSH-C-like [Larimichthys crocea]	GO:0005634;GO:0003677;GO:0000981;GO:0007275	nucleus;DNA binding;DNA-binding transcription factor activity, RNA polymerase II-specific;multicellular organism development	K09341	MSX	http://www.genome.jp/dbget-bin/www_bget?ko:K09341	Human T-cell leukemia virus 1 infection	ko05166	KOG0492	Transcription factor MSH, contains HOX domain	sp|Q01703|MSXC_DANRE	Homeobox protein MSH-C OS=Danio rerio OX=7955 GN=msxc PE=2 SV=1
gene17322	2152	1.17	1.78	1.47	0.11	0.17	0.15	-2.9327	1.58933e-05	0.000197776	cemip	TMS13356.1	Cell migration-inducing and hyaluronan-binding protein, partial [Larimichthys crocea]	GO:0008152;GO:0004415;GO:0005886	metabolic process;hyalurononglucosaminidase activity;plasma membrane	K19031	CEMIP,KIAA1199	http://www.genome.jp/dbget-bin/www_bget?ko:K19031	-	-	-	-	sp|Q8BI06|CEMIP_MOUSE	Cell migration-inducing and hyaluronan-binding protein OS=Mus musculus OX=10090 GN=Cemip PE=1 SV=4
gene22887	702	20.03	35.16	10.12	3.82	3.92	9.57	-1.55375	0.00253986	0.013987	LOC104939191	TMS16248.1;XP_027144490.1	Troponin C, slow skeletal and cardiac muscles [Larimichthys crocea];retinoic acid receptor responder protein 3-like isoform X1 [Larimichthys crocea]	-	-	-	-	-	-	-	-	-	sp|Q9UL19|PLAT4_HUMAN	Phospholipase A and acyltransferase 4 OS=Homo sapiens OX=9606 GN=PLAAT4 PE=1 SV=1
gene3617	6759	4.49	6.78	2.55	0.84	0.56	1.8	-1.80002	2.44796e-05	0.000287072	camsap3	KAE8283326.1;XP_019114662.1	Calmodulin-regulated spectrin-associated protein 3 [Larimichthys crocea];calmodulin-regulated spectrin-associated protein 3 isoform X2 [Larimichthys crocea]	GO:0008017;GO:0030507;GO:0005516;GO:0005737;GO:0005874;GO:0031175	microtubule binding;spectrin binding;calmodulin binding;cytoplasm;microtubule;neuron projection development	K17493	CAMSAP	http://www.genome.jp/dbget-bin/www_bget?ko:K17493	-	-	KOG3654	Uncharacterized CH domain protein	sp|Q9P1Y5|CAMP3_HUMAN	Calmodulin-regulated spectrin-associated protein 3 OS=Homo sapiens OX=9606 GN=CAMSAP3 PE=1 SV=2
gene5414	2942	155.85	141.71	140.44	42.55	31.69	61.13	-1.32591	1.50576e-06	2.61985e-05	rbm5	TMS19531.1	RNA-binding protein 5 [Larimichthys crocea]	GO:0046872;GO:0042981;GO:0003723;GO:0005681;GO:0008380;GO:0000381	metal ion binding;regulation of apoptotic process;RNA binding;spliceosomal complex;RNA splicing;regulation of alternative mRNA splicing, via spliceosome	K13094	RBM5_10	http://www.genome.jp/dbget-bin/www_bget?ko:K13094	-	-	KOG0154	RNA-binding protein RBM5 and related proteins, contain G-patch and RRM domains	sp|P52756|RBM5_HUMAN	RNA-binding protein 5 OS=Homo sapiens OX=9606 GN=RBM5 PE=1 SV=2
gene13204	5570	0.64	0.3	0.48	0.06	0.09	0.07	-2.22235	0.0012279	0.00766692	vwde	XP_027141882.1	von Willebrand factor D and EGF domain-containing protein isoform X1 [Larimichthys crocea]	GO:0005509	calcium ion binding	-	-	-	-	-	-	-	sp|Q8N2E2|VWDE_HUMAN	von Willebrand factor D and EGF domain-containing protein OS=Homo sapiens OX=9606 GN=VWDE PE=2 SV=4
novel.11074	1763	7.75	26.83	9.37	0.12	0.14	0.2	-6.38495	1.52076e-19	4.23352e-17	SLC5A7	KAE8278525.1;XP_027147232.1;XP_027147229.1	Oxysterol-binding protein-related protein 11 [Larimichthys crocea];high affinity choline transporter 1 [Larimichthys crocea];high-affinity choline transporter 1 [Larimichthys crocea]	GO:0016021;GO:0008289;GO:0022857;GO:0006869	integral component of membrane;lipid binding;transmembrane transporter activity;lipid transport	K14387	SLC5A7,CHT1	http://www.genome.jp/dbget-bin/www_bget?ko:K14387	Choline metabolism in cancer;Cholinergic synapse	ko05231,ko04725	-	-	sp|Q9GZV3|SC5A7_HUMAN;sp|Q8UWF0|SC5A7_TORMA	High affinity choline transporter 1 OS=Homo sapiens OX=9606 GN=SLC5A7 PE=1 SV=1;High-affinity choline transporter 1 OS=Torpedo marmorata OX=7788 GN=CHT1 PE=2 SV=1
gene3087	1380	7.72	27.82	10.64	1.58	1.2	4.34	-2.43339	1.34199e-05	0.000171009	LOC104917989	TMS17677.1	Transcription cofactor vestigial-like protein 1 [Larimichthys crocea]	GO:0005634;GO:0006355	nucleus;regulation of transcription, DNA-templated	-	-	-	-	-	-	-	-	-
novel.1304	304	8.61	1.26	334.39	4.4	1.25	3.69	-4.92065	0.0105355	0.0439812	-	TNN82345.1	hypothetical protein EYF80_007466 [Liparis tanakae]	GO:0005576;GO:0005179	extracellular region;hormone activity	-	-	-	-	-	-	-	-	-
gene9361	1143	14.73	20.92	10.49	4.25	2.73	6.16	-1.47169	0.00014169	0.00125808	pqlc3	XP_010736527.1	PQ-loop repeat-containing protein 3 [Larimichthys crocea]	GO:0016021	integral component of membrane	K23680	PQLC3,SLC66A3	http://www.genome.jp/dbget-bin/www_bget?ko:K23680	-	-	-	-	sp|Q8N755|S66A3_HUMAN	Solute carrier family 66 member 3 OS=Homo sapiens OX=9606 GN=SLC66A3 PE=2 SV=1
gene19389	1919	3.32	4.58	2.9	0.91	0.45	0.99	-1.81617	8.89877e-05	0.000849291	LOC104935508	XP_010749662.3	tripartite motif-containing protein 16 [Larimichthys crocea]	-	-	-	-	-	-	-	-	-	sp|Q14258|TRI25_HUMAN	E3 ubiquitin/ISG15 ligase TRIM25 OS=Homo sapiens OX=9606 GN=TRIM25 PE=1 SV=2
gene719	2261	5.64	4.39	5.46	0.41	0.75	0.06	-3.66691	2.69217e-07	5.88714e-06	LOC104922551	XP_010733705.2;XP_019117096.1	protein-lysine methyltransferase METTL21E isoform X2 [Larimichthys crocea];protein-lysine methyltransferase METTL21E isoform X1 [Larimichthys crocea]	GO:0046872;GO:0005634;GO:0003697;GO:0008168;GO:0006289;GO:0004519;GO:0032259	metal ion binding;nucleus;single-stranded DNA binding;methyltransferase activity;nucleotide-excision repair;endonuclease activity;methylation	-	-	-	-	-	KOG2793	Putative N2,N2-dimethylguanosine tRNA methyltransferase	sp|Q8CDZ2|MT21E_MOUSE;sp|Q58DC7|MT21E_BOVIN	Protein-lysine methyltransferase METTL21E OS=Mus musculus OX=10090 GN=Mettl21e PE=2 SV=1;Protein-lysine methyltransferase METTL21E OS=Bos taurus OX=9913 GN=METTL21E PE=2 SV=1
gene19267	1550	5.66	8.23	3.05	0.18	0.21	0.93	-3.46484	3.04453e-08	8.45642e-07	LOC104935377	XP_027145781.1	N-acetyllactosaminide beta-1,3-N-acetylglucosaminyltransferase 3-like isoform X1 [Larimichthys crocea]	GO:0016021;GO:0016758;GO:0006486;GO:0000139	integral component of membrane;hexosyltransferase activity;protein glycosylation;Golgi membrane	K07970	B3GNT3	http://www.genome.jp/dbget-bin/www_bget?ko:K07970	Glycosphingolipid biosynthesis - lacto and neolacto series;Mucin type O-glycan biosynthesis	ko00601,ko00512	-	-	sp|Q9Y2A9|B3GN3_HUMAN	N-acetyllactosaminide beta-1,3-N-acetylglucosaminyltransferase 3 OS=Homo sapiens OX=9606 GN=B3GNT3 PE=1 SV=2
gene16309	1144	11.13	24.84	8.32	3.22	0.58	2.88	-2.55263	1.31239e-05	0.00016778	LOC104932216	XP_027140789.1	uncharacterized protein LOC104932216 [Larimichthys crocea]	GO:0016021	integral component of membrane	K10785	TRBV	http://www.genome.jp/dbget-bin/www_bget?ko:K10785	Calcium signaling pathway;NF-kappa B signaling pathway;Rap1 signaling pathway;Ras signaling pathway;Cell adhesion molecules;PD-L1 expression and PD-1 checkpoint pathway in cancer;Transcriptional misregulation in cancer;Viral myocarditis;Type I diabetes mellitus;Allograft rejection;Asthma;Autoimmune thyroid disease;Graft-versus-host disease;Inflammatory bowel disease;Rheumatoid arthritis;Systemic …	ko04020,ko04064,ko04015,ko04014,ko04514,ko05235,ko05202,ko05416,ko04940,ko05330,ko05310,ko05320,ko05332,ko05321,ko05323,ko05322,ko05150,ko05135,ko05142,ko05144,ko05169,ko05166,ko05170,ko05162,ko04612,ko04672,ko04660,ko04658,ko04659	-	-	sp|P0DTU4|TRBR2_HUMAN;sp|P0DSE2|TRBR1_HUMAN	T cell receptor beta chain MC.7.G5 OS=Homo sapiens OX=9606 GN=TRB PE=1 SV=1;M1-specific T cell receptor beta chain OS=Homo sapiens OX=9606 GN=TRB PE=1 SV=1
novel.8665	1466	1.69	1.26	0.58	0.04	0.04	0.09	-3.91154	0.000228406	0.00186827	-	-	-	-	-	-	-	-	-	-	-	-	-	-
gene17420	1475	33.59	48.83	20.35	8.41	5.23	17.02	-1.43147	0.000355865	0.00272295	LOC104933387	XP_027142489.1	proteasome subunit beta type-9 [Larimichthys crocea]	GO:0005839;GO:0005737;GO:0005634;GO:0004298;GO:0002376;GO:0051603	proteasome core complex;cytoplasm;nucleus;threonine-type endopeptidase activity;immune system process;proteolysis involved in cellular protein catabolic process	K02741	PSMB9,LMP2	http://www.genome.jp/dbget-bin/www_bget?ko:K02741	Proteasome	ko03050	KOG0174	20S proteasome, regulatory subunit beta type PSMB6/PSMB9/PRE3	sp|Q8UW64|PSB9_ORYLA	Proteasome subunit beta type-9 OS=Oryzias latipes OX=8090 GN=psmb9 PE=3 SV=1
gene1856	1419	40.43	81.82	20.49	9	4.48	29	-1.54374	0.00654854	0.0300735	anxa3	KAE8291739.1;XP_010749145.3;TMS03366.1	Extracellular matrix protein FRAS1 Precursor [Larimichthys crocea];annexin A3 [Larimichthys crocea];Annexin A3 [Larimichthys crocea]	GO:0004859;GO:0007154;GO:0005544;GO:0005509;GO:0016021	phospholipase inhibitor activity;cell communication;calcium-dependent phospholipid binding;calcium ion binding;integral component of membrane	K17089	ANXA3	http://www.genome.jp/dbget-bin/www_bget?ko:K17089	-	-	-	-	sp|P12429|ANXA3_HUMAN	Annexin A3 OS=Homo sapiens OX=9606 GN=ANXA3 PE=1 SV=3
gene1556	2566	4.01	9.15	4.31	0.16	0.21	0.29	-4.32405	2.54029e-15	3.57604e-13	wnt5a	XP_027144680.1	protein Wnt-5a [Larimichthys crocea]	GO:0005102;GO:0005576;GO:0048793;GO:0016055	signaling receptor binding;extracellular region;pronephros development;Wnt signaling pathway	K00444	WNT5	http://www.genome.jp/dbget-bin/www_bget?ko:K00444	Signaling pathways regulating pluripotency of stem cells;Hippo signaling pathway;Wnt signaling pathway;mTOR signaling pathway;Pathways in cancer;Proteoglycans in cancer;Basal cell carcinoma;Breast cancer;Gastric cancer;Hepatocellular carcinoma;Cushing syndrome;Human papillomavirus infection;Alzheimer disease;Pathways of neurodegeneration - multiple diseases;Axon guidance;Melanogenesis	ko04550,ko04390,ko04310,ko04150,ko05200,ko05205,ko05217,ko05224,ko05226,ko05225,ko04934,ko05165,ko05010,ko05022,ko04360,ko04916	-	-	sp|Q27Q52|WNT5A_RABIT	Protein Wnt-5a OS=Oryctolagus cuniculus OX=9986 GN=WNT5A PE=2 SV=1
gene4744	1517	16.38	16.5	7.1	0.87	1.1	1.66	-3.10705	1.2853e-10	6.3945e-09	tm6sf1	XP_019121061.2	transmembrane 6 superfamily member 1 isoform X1 [Larimichthys crocea]	GO:0016021	integral component of membrane	K25361	TM6SF	http://www.genome.jp/dbget-bin/www_bget?ko:K25361	-	-	-	-	sp|P58749|TM6S1_MOUSE	Transmembrane 6 superfamily member 1 OS=Mus musculus OX=10090 GN=Tm6sf1 PE=2 SV=2
gene8274	6652	5.21	7.73	2.86	0.59	0.6	1.97	-2.04217	9.07633e-06	0.000122348	LOC104923601	XP_019119465.1	ankyrin repeat domain-containing protein 50 isoform X1 [Larimichthys crocea]	-	-	K21440	ANKRD50	http://www.genome.jp/dbget-bin/www_bget?ko:K21440	-	-	-	-	sp|Q9ULJ7|ANR50_HUMAN	Ankyrin repeat domain-containing protein 50 OS=Homo sapiens OX=9606 GN=ANKRD50 PE=1 SV=4
gene848	1118	96.13	192.1	51.63	4.2	10.23	15.26	-3.08173	2.45562e-08	6.99315e-07	lcn2	KAE8285170.1	Prostaglandin-H2 D-isomerase [Larimichthys crocea]	GO:0016853;GO:0036094;GO:0005576	isomerase activity;small molecule binding;extracellular region	K01830	PTGDS	http://www.genome.jp/dbget-bin/www_bget?ko:K01830	Arachidonic acid metabolism	ko00590	-	-	sp|Q01584|LIPO_RHIMB	Lipocalin OS=Rhinella marina OX=8386 PE=1 SV=1
gene8042	5186	14.61	25.7	8.97	2.38	2.52	6.38	-1.79417	3.74628e-05	0.000410154	aim1	XP_027130692.1	microtubule-associated protein futsch isoform X1 [Larimichthys crocea]	-	-	-	-	-	-	-	-	-	sp|Q9Y4K1|CRBG1_HUMAN	Beta/gamma crystallin domain-containing protein 1 OS=Homo sapiens OX=9606 GN=CRYBG1 PE=1 SV=3
novel.9331	1232	1.78	3.03	2.42	0	0	0.06	-6.47813	1.7623e-06	3.00914e-05	-	TKS81476.1	hypothetical protein D9C73_015581 [Collichthys lucidus]	-	-	-	-	-	-	-	-	-	-	-
gene6446	1388	3.14	3.09	2.35	0.55	0.47	0.75	-1.86929	0.000405833	0.00303866	cenpk	TMS23305.1	Centromere protein K [Larimichthys crocea]	GO:0005634;GO:0051382;GO:0000775	nucleus;kinetochore assembly;chromosome, centromeric region	K11503	CENPK	http://www.genome.jp/dbget-bin/www_bget?ko:K11503	-	-	-	-	sp|Q1T7C1|CENPK_CHICK	Centromere protein K OS=Gallus gallus OX=9031 GN=CENPK PE=1 SV=1
gene14890	5882	4.29	4.72	4.24	0.32	0.19	0.4	-3.49906	1.23937e-21	4.26501e-19	scube3	XP_019113518.1;XP_010743847.1	signal peptide, CUB and EGF-like domain-containing protein 3 isoform X2 [Larimichthys crocea];signal peptide, CUB and EGF-like domain-containing protein 3 isoform X3 [Larimichthys crocea]	GO:0005509	calcium ion binding	K24468	SCUBE1_3	http://www.genome.jp/dbget-bin/www_bget?ko:K24468	-	-	KOG1217	Fibrillins and related proteins containing Ca2+-binding EGF-like domains	sp|Q66PY1|SCUB3_MOUSE	Signal peptide, CUB and EGF-like domain-containing protein 3 OS=Mus musculus OX=10090 GN=Scube3 PE=1 SV=1
gene22865	2151	3.26	4.49	5.65	0.49	0.44	1.01	-2.44096	3.17787e-07	6.78165e-06	kiaa1598	XP_019132096.1;KAE8280210.1	shootin-1 isoform X3 [Larimichthys crocea];Shootin-1 [Larimichthys crocea]	GO:0030426;GO:0030027;GO:0043204;GO:0005856;GO:0007275;GO:0005737;GO:0030175	growth cone;lamellipodium;perikaryon;cytoskeleton;multicellular organism development;cytoplasm;filopodium	-	-	-	-	-	-	-	sp|Q6P0R8|SHOT1_DANRE	Shootin-1 OS=Danio rerio OX=7955 GN=shtn1 PE=2 SV=2
novel.15274	1149	10.55	4.99	9.34	1.86	1.17	2.8	-1.7879	0.000310202	0.00242371	-	TMS23276.1	hypothetical protein E3U43_008582 [Larimichthys crocea]	-	-	-	-	-	-	-	-	-	-	-
gene21427	5602	1.28	1.38	0.63	0.1	0.1	0.02	-3.26677	4.85576e-05	0.00050805	slc16a7	XP_010752227.2	monocarboxylate transporter 2 [Larimichthys crocea]	GO:1901475;GO:0015293;GO:0008028;GO:0005887	pyruvate transmembrane transport;symporter activity;monocarboxylic acid transmembrane transporter activity;integral component of plasma membrane	K08184	SLC16A7	http://www.genome.jp/dbget-bin/www_bget?ko:K08184	-	-	-	-	sp|O60669|MOT2_HUMAN	Monocarboxylate transporter 2 OS=Homo sapiens OX=9606 GN=SLC16A7 PE=1 SV=2
novel.6221	354	6.5	28.85	8.09	2.31	0.63	2.55	-2.54926	0.01153	0.0473273	B4GALT1	XP_027130197.1	beta-1,4-galactosyltransferase 1-like isoform X2 [Larimichthys crocea]	GO:0016021;GO:0032580;GO:0016757;GO:0006486;GO:0005975	integral component of membrane;Golgi cisterna membrane;glycosyltransferase activity;protein glycosylation;carbohydrate metabolic process	K07966	B4GALT1	http://www.genome.jp/dbget-bin/www_bget?ko:K07966	Galactose metabolism;Glycosaminoglycan biosynthesis - keratan sulfate;Glycosphingolipid biosynthesis - lacto and neolacto series;Mannose type O-glycan biosynthesis;N-Glycan biosynthesis;Other types of O-glycan biosynthesis;Various types of N-glycan biosynthesis	ko00052,ko00533,ko00601,ko00515,ko00510,ko00514,ko00513	KOG3916	UDP-Gal:glucosylceramide beta-1,4-galactosyltransferase	sp|P08037|B4GT1_BOVIN	Beta-1,4-galactosyltransferase 1 OS=Bos taurus OX=9913 GN=B4GALT1 PE=1 SV=3
novel.21072	366	22.83	15.47	7.87	2.56	0.55	3.28	-2.65318	0.00239773	0.0133767	UGT2B15	TKS69825.1	UDP-glucuronosyltransferase 2A1 [Collichthys lucidus]	GO:0015020;GO:0016021	glucuronosyltransferase activity;integral component of membrane	K00699	UGT	http://www.genome.jp/dbget-bin/www_bget?ko:K00699	Chemical carcinogenesis - DNA adducts;Chemical carcinogenesis - receptor activation;Ascorbate and aldarate metabolism;Pentose and glucuronate interconversions;Steroid hormone biosynthesis;Porphyrin and chlorophyll metabolism;Retinol metabolism;Drug metabolism - cytochrome P450;Drug metabolism - other enzymes;Metabolism of xenobiotics by cytochrome P450;Bile secretion	ko05204,ko05207,ko00053,ko00040,ko00140,ko00860,ko00830,ko00982,ko00983,ko00980,ko04976	-	-	sp|P54855|UDB15_HUMAN	UDP-glucuronosyltransferase 2B15 OS=Homo sapiens OX=9606 GN=UGT2B15 PE=1 SV=3
gene7480	7308	2.66	4	1.78	0.25	0.21	0.51	-2.77086	2.43703e-11	1.40418e-09	magi3	CBN80706.1;KAE8298252.1	Membrane-associated guanylate kinase, WW and PDZ domain-containing protein 3 [Dicentrarchus labrax];Membrane-associated guanylate kinase, WW and PDZ domain-containing protein 3 [Larimichthys crocea]	GO:0005737;GO:0016020;GO:0030054;GO:0016301;GO:0060271	cytoplasm;membrane;cell junction;kinase activity;cilium assembly	K06112	MAGI3	http://www.genome.jp/dbget-bin/www_bget?ko:K06112	Rap1 signaling pathway	ko04015	KOG3209	WW domain-containing protein	sp|Q5TCQ9|MAGI3_HUMAN;sp|A1A5G4|MAGI3_XENTR	Membrane-associated guanylate kinase, WW and PDZ domain-containing protein 3 OS=Homo sapiens OX=9606 GN=MAGI3 PE=1 SV=3;Membrane-associated guanylate kinase, WW and PDZ domain-containing protein 3 OS=Xenopus tropicalis OX=8364 GN=magi3 PE=2 SV=1
gene18349	2402	24.69	29.74	29.14	5.1	3.33	10.55	-1.89933	1.31749e-08	4.05995e-07	LOC104934385	KAE8286681.1;XP_010748335.3	hypothetical protein D5F01_LYC14625 [Larimichthys crocea];interleukin-31 receptor subunit alpha [Larimichthys crocea]	GO:0004725;GO:0004484;GO:0016021;GO:0006370	protein tyrosine phosphatase activity;mRNA guanylyltransferase activity;integral component of membrane;7-methylguanosine mRNA capping	K22630	IL31RA	http://www.genome.jp/dbget-bin/www_bget?ko:K22630	Cytokine-cytokine receptor interaction	ko04060	-	-	sp|P40223|CSF3R_MOUSE;sp|Q8K5B1|IL31R_MOUSE	Granulocyte colony-stimulating factor receptor OS=Mus musculus OX=10090 GN=Csf3r PE=1 SV=2;Interleukin-31 receptor subunit alpha OS=Mus musculus OX=10090 GN=Il31ra PE=1 SV=3
gene5497	2439	2.05	7.12	1.89	1	0.56	1.26	-1.58675	0.00727798	0.032708	LOC104920595	KAE8286208.1	Lysophosphatidic acid receptor 4 [Larimichthys crocea]	GO:0004930;GO:0016021	G protein-coupled receptor activity;integral component of membrane	K04274	P2RY10	http://www.genome.jp/dbget-bin/www_bget?ko:K04274	Neuroactive ligand-receptor interaction	ko04080	-	-	sp|Q8BFU7|P2Y10_MOUSE	Putative P2Y purinoceptor 10 OS=Mus musculus OX=10090 GN=P2ry10 PE=2 SV=1
gene22072	1296	1.22	2.68	1.28	0.15	0.1	0.27	-2.94707	0.000321277	0.0024992	LOC104938339	XP_019113182.2	zinc-binding protein A33 [Larimichthys crocea]	GO:0008270	zinc ion binding	K12012	TRIM35	http://www.genome.jp/dbget-bin/www_bget?ko:K12012	-	-	-	-	sp|Q02084|A33_PLEWA	Zinc-binding protein A33 OS=Pleurodeles waltl OX=8319 PE=1 SV=2
gene10502	1674	1.31	6.03	1.04	0.37	0.04	0.76	-2.61136	0.00287886	0.0154688	LOC104926034	XP_027146361.1	cytochrome P450 2J6 [Larimichthys crocea]	GO:0016712;GO:0005506;GO:0016021;GO:0020037	oxidoreductase activity, acting on paired donors, with incorporation or reduction of molecular oxygen, reduced flavin or flavoprotein as one donor, and incorporation of one atom of oxygen;iron ion binding;integral component of membrane;heme binding	-	-	-	-	-	-	-	sp|Q9QXF7|CP2J4_RAT	Cytochrome P450 2J4 OS=Rattus norvegicus OX=10116 GN=CYP2J4 PE=1 SV=1
gene16441	2669	0.34	3.48	0.44	0.02	0.1	0.16	-3.41998	0.000801438	0.00537387	sytl5	XP_027147139.1;XP_027147141.1	synaptotagmin-like protein 5 isoform X1 [Larimichthys crocea];synaptotagmin-like protein 5 isoform X3 [Larimichthys crocea]	GO:0031267;GO:0006886;GO:0016020;GO:0005543	small GTPase binding;intracellular protein transport;membrane;phospholipid binding	K17598	SYTL	http://www.genome.jp/dbget-bin/www_bget?ko:K17598	-	-	-	-	sp|Q8TDW5|SYTL5_HUMAN;sp|Q80T23|SYTL5_MOUSE	Synaptotagmin-like protein 5 OS=Homo sapiens OX=9606 GN=SYTL5 PE=1 SV=1;Synaptotagmin-like protein 5 OS=Mus musculus OX=10090 GN=Sytl5 PE=1 SV=1
gene23740	1611	5.08	5.13	9.52	1.31	1.5	2.38	-1.59581	0.00110477	0.00700898	LOC104940092	XP_010754955.3	uncharacterized protein LOC104940092 [Larimichthys crocea]	GO:0004725;GO:0030131;GO:0006886;GO:0016192;GO:0008138	protein tyrosine phosphatase activity;clathrin adaptor complex;intracellular protein transport;vesicle-mediated transport;protein tyrosine/serine/threonine phosphatase activity	K04459	DUSP,MKP	http://www.genome.jp/dbget-bin/www_bget?ko:K04459	MAPK signaling pathway;Axon regeneration	ko04010,ko04361	-	-	sp|O09112|DUS8_MOUSE;sp|Q13202|DUS8_HUMAN	Dual specificity protein phosphatase 8 OS=Mus musculus OX=10090 GN=Dusp8 PE=2 SV=1;Dual specificity protein phosphatase 8 OS=Homo sapiens OX=9606 GN=DUSP8 PE=1 SV=2
gene8582	1443	58.53	84.63	41.71	11.24	10.94	28.03	-1.51277	6.54573e-05	0.000658988	ctsk	KAE8289276.1;XP_019115297.1	Cathepsin K [Larimichthys crocea];cathepsin K [Larimichthys crocea]	GO:0005576;GO:0004197;GO:0016324	extracellular region;cysteine-type endopeptidase activity;apical plasma membrane	K01371	CTSK	http://www.genome.jp/dbget-bin/www_bget?ko:K01371	Apoptosis;Lysosome;Rheumatoid arthritis;Osteoclast differentiation;Toll-like receptor signaling pathway	ko04210,ko04142,ko05323,ko04380,ko04620	KOG1543	Cysteine proteinase Cathepsin L	sp|Q9GLE3|CATK_PIG	Cathepsin K OS=Sus scrofa OX=9823 GN=CTSK PE=2 SV=1
gene2022	3162	12.26	18.21	8.21	2.66	2.21	5.08	-1.61092	1.44378e-05	0.000182505	plcd1	XP_019123027.1;XP_019123028.1	1-phosphatidylinositol 4,5-bisphosphate phosphodiesterase delta-1 isoform X1 [Larimichthys crocea];1-phosphatidylinositol 4,5-bisphosphate phosphodiesterase delta-1 isoform X2 [Larimichthys crocea]	GO:0005509;GO:0004435;GO:0016042;GO:0035556	calcium ion binding;phosphatidylinositol phospholipase C activity;lipid catabolic process;intracellular signal transduction	K05857	PLCD	http://www.genome.jp/dbget-bin/www_bget?ko:K05857	Calcium signaling pathway;Phosphatidylinositol signaling system;AGE-RAGE signaling pathway in diabetic complications;Shigellosis;Inositol phosphate metabolism;Thyroid hormone signaling pathway	ko04020,ko04070,ko04933,ko05131,ko00562,ko04919	-	-	sp|P10895|PLCD1_BOVIN	1-phosphatidylinositol 4,5-bisphosphate phosphodiesterase delta-1 OS=Bos taurus OX=9913 GN=PLCD1 PE=2 SV=2
gene16775	1957	5.46	9.3	5.66	0.61	0.47	0.63	-3.14143	1.29771e-11	8.09878e-10	LOC104932712	XP_019133769.2	MICAL-like protein 1 isoform X1 [Larimichthys crocea]	-	-	K19948	MICALL1	http://www.genome.jp/dbget-bin/www_bget?ko:K19948	-	-	-	-	sp|E1BBG2|MILK1_BOVIN	MICAL-like protein 1 OS=Bos taurus OX=9913 GN=MICALL1 PE=1 SV=2
novel.21283	2305	2.42	2.23	1.9	0.58	0.49	0.54	-1.58101	0.0014196	0.00865666	-	TDH15407.1	hypothetical protein EPR50_G00031400, partial [Perca flavescens]	-	-	K09228	KRAB	http://www.genome.jp/dbget-bin/www_bget?ko:K09228	Herpes simplex virus 1 infection	ko05168	-	-	-	-
gene2486	1336	15.31	13.31	9.94	0.73	0.54	3.15	-2.93124	8.92826e-09	2.85797e-07	LOC104940404	KAE8290014.1	Mitochondrial peptide methionine sulfoxide reductase [Larimichthys crocea]	GO:0016021;GO:0008113	integral component of membrane;peptide-methionine (S)-S-oxide reductase activity	K07304	msrA	http://www.genome.jp/dbget-bin/www_bget?ko:K07304	-	-	KOG1635	Peptide methionine sulfoxide reductase	sp|P54149|MSRA_BOVIN	Mitochondrial peptide methionine sulfoxide reductase OS=Bos taurus OX=9913 GN=MSRA PE=1 SV=2
gene5924	2175	12.59	18.87	7.78	0.33	0.32	0.91	-4.33475	5.83705e-20	1.7014e-17	LOC104921048	XP_010731782.1	solute carrier family 22 member 4 isoform X1 [Larimichthys crocea]	GO:0022857;GO:0016021	transmembrane transporter activity;integral component of membrane	K08202	SLC22A4_5,OCTN	http://www.genome.jp/dbget-bin/www_bget?ko:K08202	Choline metabolism in cancer	ko05231	KOG0255	Synaptic vesicle transporter SVOP and related transporters (major facilitator superfamily)	sp|Q9Z306|S22A4_MOUSE;sp|O70594|S22A5_RAT	Solute carrier family 22 member 4 OS=Mus musculus OX=10090 GN=Slc22a4 PE=1 SV=1;Solute carrier family 22 member 5 OS=Rattus norvegicus OX=10116 GN=Slc22a5 PE=1 SV=1
gene11409	6170	15.12	21.1	8.91	0.24	0.07	0.27	-5.93486	3.03849e-36	4.70511e-33	bcl11b	TMS11970.1;XP_019125417.1	B-cell lymphoma/leukemia 11B [Larimichthys crocea];B-cell lymphoma/leukemia 11B isoform X2 [Larimichthys crocea]	-	-	K22046	BCL11B	http://www.genome.jp/dbget-bin/www_bget?ko:K22046	Transcriptional misregulation in cancer	ko05202	-	-	sp|Q9C0K0|BC11B_HUMAN	B-cell lymphoma/leukemia 11B OS=Homo sapiens OX=9606 GN=BCL11B PE=1 SV=1
gene15596	6580	4.79	9.34	5.32	0.6	1.04	1.53	-2.22616	6.81973e-07	1.31087e-05	LOC104931439	XP_019119077.1;XP_010744749.2;XP_010744753.2;XP_010744756.2;XP_010744752.2;XP_019119088.1;XP_010744754.2;XP_010744746.2;XP_010744755.2	receptor-type tyrosine-protein phosphatase F isoform X2 [Larimichthys crocea];receptor-type tyrosine-protein phosphatase F isoform X6 [Larimichthys crocea];receptor-type tyrosine-protein phosphatase F isoform X9 [Larimichthys crocea];receptor-type tyrosine-protein phosphatase F isoform X13 [Larimichthys crocea];receptor-type tyrosine-protein phosphatase F isoform X11 [Larimichthys crocea];recepto…	-	-	K05695	PTPRF,LAR	http://www.genome.jp/dbget-bin/www_bget?ko:K05695	Adherens junction;Cell adhesion molecules;Insulin resistance;Insulin signaling pathway	ko04520,ko04514,ko04931,ko04910	-	-	sp|A4IFW2|PTPRF_DANRE	Receptor-type tyrosine-protein phosphatase F OS=Danio rerio OX=7955 GN=ptprf PE=2 SV=1
gene825	1841	0.57	1.06	0.71	0	0	0.25	-3.18358	0.00684128	0.0311738	LOC104923538	XP_010734972.2	keratin, type I cytoskeletal 18 [Larimichthys crocea]	GO:0005198;GO:0005882	structural molecule activity;intermediate filament	K07604	KRT1	http://www.genome.jp/dbget-bin/www_bget?ko:K07604	Staphylococcus aureus infection;Estrogen signaling pathway	ko05150,ko04915	-	-	sp|Q7ZTS4|K1C18_DANRE	Keratin, type I cytoskeletal 18 OS=Danio rerio OX=7955 GN=krt18 PE=1 SV=2
gene18592	2746	0.11	2.55	0.13	0.08	0.1	0.03	-3.08662	0.0122123	0.0493594	LOC104934647	XP_036928160.1;XP_018553278.1	uncharacterized protein LOC119004932 [Acanthopagrus latus];PREDICTED: uncharacterized protein LOC108897954 [Lates calcarifer]	GO:0004447;GO:0016020;GO:0006590;GO:0016021;GO:0020037;GO:0006979	iodide peroxidase activity;membrane;thyroid hormone generation;integral component of membrane;heme binding;response to oxidative stress	K20733	MSLN	http://www.genome.jp/dbget-bin/www_bget?ko:K20733	-	-	-	-	-	-
gene11093	1291	4.32	3.16	4.3	0.35	0.29	0.38	-2.85514	9.50061e-07	1.74749e-05	arsb	XP_019120324.1;KAE8285349.1	arylsulfatase B [Larimichthys crocea];Arylsulfatase B [Larimichthys crocea]	GO:0008484	sulfuric ester hydrolase activity	K01135	ARSB	http://www.genome.jp/dbget-bin/www_bget?ko:K01135	Lysosome;Glycosaminoglycan degradation	ko04142,ko00531	KOG3867	Sulfatase	sp|P33727|ARSB_FELCA	Arylsulfatase B OS=Felis catus OX=9685 GN=ARSB PE=2 SV=1
gene9765	3003	8.13	9.12	5.61	2.66	1.16	4.53	-1.13316	0.0045499	0.0224157	rcbtb2	XP_010737091.1	RCC1 and BTB domain-containing protein 2 isoform X1 [Larimichthys crocea]	-	-	K11494	RCBTB	http://www.genome.jp/dbget-bin/www_bget?ko:K11494	-	-	KOG1426	FOG: RCC1 domain	sp|Q6P798|RCBT2_RAT	RCC1 and BTB domain-containing protein 2 OS=Rattus norvegicus OX=10116 GN=Rcbtb2 PE=2 SV=1
novel.10719	1334	6.27	7.5	5.4	1.55	1.78	1.32	-1.5167	0.00246956	0.0136789	-	-	-	-	-	-	-	-	-	-	-	-	-	-
gene12698	3919	1.82	3.03	2.49	0.45	0.37	1.66	-1.39958	0.00562059	0.0265199	agap2	XP_010740917.1;XP_010740918.1	arf-GAP with GTPase, ANK repeat and PH domain-containing protein 2 isoform X4 [Larimichthys crocea];arf-GAP with GTPase, ANK repeat and PH domain-containing protein 2 isoform X5 [Larimichthys crocea]	GO:0003924;GO:0005096;GO:0046872;GO:0005525;GO:0043547	GTPase activity;GTPase activator activity;metal ion binding;GTP binding;positive regulation of GTPase activity	K17848	AGAP2	http://www.genome.jp/dbget-bin/www_bget?ko:K17848	Endocytosis;FoxO signaling pathway	ko04144,ko04068	-	-	sp|Q8BXK8|AGAP1_MOUSE;sp|Q99490|AGAP2_HUMAN	Arf-GAP with GTPase, ANK repeat and PH domain-containing protein 1 OS=Mus musculus OX=10090 GN=Agap1 PE=1 SV=1;Arf-GAP with GTPase, ANK repeat and PH domain-containing protein 2 OS=Homo sapiens OX=9606 GN=AGAP2 PE=1 SV=2
gene8428	4051	1.24	1.01	0.66	0.3	0.11	0.22	-1.77104	0.00201561	0.0115867	mms22l	KAE8288432.1	Protein MMS22-like Methyl methanesulfonate-sensitivity protein 22-like [Larimichthys crocea]	GO:0005634;GO:0000724;GO:0031297	nucleus;double-strand break repair via homologous recombination;replication fork processing	-	-	-	-	-	-	-	sp|B3DIY3|MMS22_DANRE	Protein MMS22-like OS=Danio rerio OX=7955 GN=mms22l PE=2 SV=1
novel.14086	4457	0.98	1.09	0.66	0.14	0.08	0.32	-2.07746	0.0001448	0.00128036	-	-	-	-	-	-	-	-	-	-	-	-	-	-
gene9347	2217	1.48	3.58	1.79	0.59	0.18	0.43	-1.87778	0.00224002	0.0126215	lrmp	XP_019108847.2;KAE8281547.1	lymphoid-restricted membrane protein isoform X3 [Larimichthys crocea];Lymphoid-restricted membrane protein [Larimichthys crocea]	GO:0005737;GO:0016021	cytoplasm;integral component of membrane	-	-	-	-	-	-	-	sp|Q5RHB5|IRAG2_DANRE	Inositol 1,4,5-triphosphate receptor associated 2 OS=Danio rerio OX=7955 GN=irag2 PE=1 SV=2
gene10296	5632	9.12	13.9	7.17	1.02	0.29	1.29	-3.26667	5.84812e-13	4.79778e-11	LOC104925759	XP_010737763.3	poly [ADP-ribose] polymerase 14-like isoform X1 [Larimichthys crocea]	GO:0003950	NAD+ ADP-ribosyltransferase activity	K15261	PARP10_14_15	http://www.genome.jp/dbget-bin/www_bget?ko:K15261	-	-	-	-	sp|Q460N5|PAR14_HUMAN	Protein mono-ADP-ribosyltransferase PARP14 OS=Homo sapiens OX=9606 GN=PARP14 PE=1 SV=3
gene21101	3192	1.67	3.08	2.49	0.51	0.72	1.13	-1.23355	0.00869138	0.0376794	LOC104937298	XP_019119546.2	SH3 domain-containing protein 19 isoform X1 [Larimichthys crocea]	-	-	K23714	SH3D19	http://www.genome.jp/dbget-bin/www_bget?ko:K23714	-	-	-	-	sp|Q91X43|SH319_MOUSE	SH3 domain-containing protein 19 OS=Mus musculus OX=10090 GN=Sh3d19 PE=1 SV=2
gene20097	2952	1.77	2.21	1.81	0.48	0.22	0.88	-1.59337	0.000786101	0.00530115	LOC104936267	KAE8280277.1	Zinc finger protein ZIC 5 [Larimichthys crocea]	GO:0003677;GO:0046872;GO:0005634	DNA binding;metal ion binding;nucleus	K09226	ZIC5	http://www.genome.jp/dbget-bin/www_bget?ko:K09226	-	-	KOG1721	FOG: Zn-finger	sp|Q9IB89|ZIC5_XENLA	Zinc finger protein ZIC 5 OS=Xenopus laevis OX=8355 GN=zic5 PE=2 SV=1
novel.14315	1590	23.22	18.88	6.14	1.6	0.38	1.57	-3.25873	2.39068e-08	6.83967e-07	-	-	-	-	-	-	-	-	-	-	-	-	-	-
gene20823	1717	5.1	8.49	3.21	0.46	0.83	0.89	-2.46162	6.53252e-06	9.24855e-05	LOC104936995	XP_027141919.1	transmembrane protein 196 isoform X1 [Larimichthys crocea]	GO:0006486;GO:0016021;GO:0032580;GO:0008417	protein glycosylation;integral component of membrane;Golgi cisterna membrane;fucosyltransferase activity	K22195	TMEM196	http://www.genome.jp/dbget-bin/www_bget?ko:K22195	-	-	KOG2619	Fucosyltransferase	sp|Q99JB3|FUT9_RAT	4-galactosyl-N-acetylglucosaminide 3-alpha-L-fucosyltransferase 9 OS=Rattus norvegicus OX=10116 GN=Fut9 PE=1 SV=1
gene5839	3270	0.55	1.33	0.53	0.07	0.07	0.22	-2.43185	0.000767231	0.00519406	LOC104920959	XP_028284326.1	small conductance calcium-activated potassium channel protein 2-like isoform X2 [Parambassis ranga]	GO:0005516;GO:0016021;GO:0016286	calmodulin binding;integral component of membrane;small conductance calcium-activated potassium channel activity	K04942	KCNN1,KCA2.1	http://www.genome.jp/dbget-bin/www_bget?ko:K04942	GnRH secretion;Insulin secretion	ko04929,ko04911	KOG3684	Ca2+-activated K+ channel proteins (intermediate/small conductance classes)	sp|P58391|KCNN3_MOUSE	Small conductance calcium-activated potassium channel protein 3 OS=Mus musculus OX=10090 GN=Kcnn3 PE=1 SV=2
gene11032	3223	7.67	8.75	8.75	2.51	1.86	3.97	-1.27572	0.000175645	0.00150217	eif2ak4	XP_019128728.2	eIF-2-alpha kinase GCN2 [Larimichthys crocea]	GO:0000077;GO:0005524;GO:0106311;GO:0106310;GO:0004694	DNA damage checkpoint signaling;ATP binding;protein serine/threonine kinase activity;protein serine kinase activity;eukaryotic translation initiation factor 2alpha kinase activity	K16196	EIF2AK4	http://www.genome.jp/dbget-bin/www_bget?ko:K16196	Autophagy - animal;Protein processing in endoplasmic reticulum;Hepatitis C;Herpes simplex virus 1 infection;Measles	ko04140,ko04141,ko05160,ko05168,ko05162	KOG1035;KOG1936	eIF-2alpha kinase GCN2;Histidyl-tRNA synthetase	sp|Q9P2K8|E2AK4_HUMAN	eIF-2-alpha kinase GCN2 OS=Homo sapiens OX=9606 GN=EIF2AK4 PE=1 SV=3
gene9605	1796	2.65	2.66	4.26	0.46	0.62	1.51	-1.57852	0.00361698	0.0186347	LOC104925039	XP_010736870.1;XP_010736867.1;XP_010736868.1	neuroplastin isoform X3 [Larimichthys crocea];neuroplastin isoform X1 [Larimichthys crocea];neuroplastin isoform X2 [Larimichthys crocea]	GO:0007155;GO:0005886;GO:0016021;GO:0007411	cell adhesion;plasma membrane;integral component of membrane;axon guidance	K22653	NPTN	http://www.genome.jp/dbget-bin/www_bget?ko:K22653	-	-	-	-	sp|P97546|NPTN_RAT;sp|Q9Y639|NPTN_HUMAN	Neuroplastin OS=Rattus norvegicus OX=10116 GN=Nptn PE=1 SV=2;Neuroplastin OS=Homo sapiens OX=9606 GN=NPTN PE=1 SV=2
novel.11467	373	14.89	12.73	7.98	1.44	0.52	2.65	-2.54731	0.00444513	0.0220045	-	-	-	-	-	-	-	-	-	-	-	-	-	-
gene21125	5451	9.63	14.4	9.31	0.47	0.18	0.24	-4.76049	9.42869e-23	3.76783e-20	ptprz1	XP_019123197.2;XP_019123198.2	receptor-type tyrosine-protein phosphatase zeta isoform X4 [Larimichthys crocea];receptor-type tyrosine-protein phosphatase zeta isoform X5 [Larimichthys crocea]	GO:0004725;GO:0016020	protein tyrosine phosphatase activity;membrane	K08114	PTPRZ	http://www.genome.jp/dbget-bin/www_bget?ko:K08114	Epithelial cell signaling in Helicobacter pylori infection	ko05120	-	-	sp|B9EKR1|PTPRZ_MOUSE;sp|Q62656|PTPRZ_RAT	Receptor-type tyrosine-protein phosphatase zeta OS=Mus musculus OX=10090 GN=Ptprz1 PE=1 SV=1;Receptor-type tyrosine-protein phosphatase zeta OS=Rattus norvegicus OX=10116 GN=Ptprz1 PE=1 SV=1
gene10698	3950	17.14	17.93	5.65	1.52	1.65	3.84	-2.17853	3.1819e-06	5.01494e-05	LOC104926188	TMS10275.1	Rho guanine nucleotide exchange factor 18 [Larimichthys crocea]	GO:0005085;GO:0005737	guanyl-nucleotide exchange factor activity;cytoplasm	K21066	ARHGEF18	http://www.genome.jp/dbget-bin/www_bget?ko:K21066	Tight junction	ko04530	-	-	sp|Q6P9R4|ARHGI_MOUSE	Rho guanine nucleotide exchange factor 18 OS=Mus musculus OX=10090 GN=Arhgef18 PE=1 SV=3
novel.15871	797	1.02	2.29	2.76	0	0	0.32	-4.13385	0.00185154	0.0107989	-	XP_027131689.1	N-acetyllactosaminide beta-1,3-N-acetylglucosaminyltransferase 3 [Larimichthys crocea]	-	-	K07970	B3GNT3	http://www.genome.jp/dbget-bin/www_bget?ko:K07970	Glycosphingolipid biosynthesis - lacto and neolacto series;Mucin type O-glycan biosynthesis	ko00601,ko00512	-	-	-	-
gene6347	1522	13.76	10.06	4.69	2.43	1.05	2.46	-1.85161	0.000199806	0.00167073	cdca8	KAE8281818.1;TKS88197.1	Borealin Cell division cycle-associated protein 8 Dasra-B [Larimichthys crocea];Borealin Cell division cycle-associated protein 8 [Collichthys lucidus]	GO:0051301;GO:0005634;GO:0007049;GO:0000775	cell division;nucleus;cell cycle;chromosome, centromeric region	K11514	CDCA8	http://www.genome.jp/dbget-bin/www_bget?ko:K11514	-	-	-	-	sp|Q5XLR4|BORE1_DANRE	Borealin OS=Danio rerio OX=7955 GN=cdca8 PE=2 SV=2
gene10625	2921	3.41	8.88	3.19	0.86	0.66	1.84	-1.86195	0.000178951	0.00152675	LOC104926122	XP_027141018.1;XP_027141019.1	stromal interaction molecule 1 isoform X1 [Larimichthys crocea];stromal interaction molecule 1 isoform X2 [Larimichthys crocea]	GO:0005246;GO:0030176;GO:0046872;GO:0006816;GO:0032237	calcium channel regulator activity;integral component of endoplasmic reticulum membrane;metal ion binding;calcium ion transport;activation of store-operated calcium channel activity	K16059	STIM1	http://www.genome.jp/dbget-bin/www_bget?ko:K16059	Calcium signaling pathway;Platelet activation	ko04020,ko04611	KOG4403	Cell surface glycoprotein STIM, contains SAM domain	sp|P70302|STIM1_MOUSE	Stromal interaction molecule 1 OS=Mus musculus OX=10090 GN=Stim1 PE=1 SV=2
gene10394	3355	17.68	27.33	13.57	1.34	1.31	2.51	-3.12068	1.54139e-17	3.2922e-15	LOC104925876	XP_019118935.2	extended synaptotagmin-3-like [Larimichthys crocea]	GO:0006869;GO:0030286;GO:0005509;GO:0061817;GO:0005929;GO:0005874;GO:0005789;GO:0008289;GO:0005886;GO:0016021;GO:0005524	lipid transport;dynein complex;calcium ion binding;endoplasmic reticulum-plasma membrane tethering;cilium;microtubule;endoplasmic reticulum membrane;lipid binding;plasma membrane;integral component of membrane;ATP binding	-	-	-	-	-	KOG1012	Ca2+-dependent lipid-binding protein CLB1/vesicle protein vp115/Granuphilin A, contains C2 domain	sp|Q5M7N9|ESYT3_XENTR	Extended synaptotagmin-3 OS=Xenopus tropicalis OX=8364 GN=esyt3 PE=2 SV=1
gene2337	3278	4.66	5.54	3.41	0.87	0.26	2.55	-1.73751	0.00152789	0.00918811	il17re	XP_010755087.2;APM87157.1	uncharacterized protein LOC104940235 [Larimichthys crocea];interleukin 17 receptor E [Larimichthys crocea]	GO:0030368;GO:0006954;GO:0016021	interleukin-17 receptor activity;inflammatory response;integral component of membrane	K05168	IL17RE	http://www.genome.jp/dbget-bin/www_bget?ko:K05168	Cytokine-cytokine receptor interaction;IL-17 signaling pathway	ko04060,ko04657	-	-	sp|Q6AZ51|I17RE_RAT;sp|Q8BH06|I17RE_MOUSE	Interleukin-17 receptor E OS=Rattus norvegicus OX=10116 GN=Il17re PE=2 SV=1;Interleukin-17 receptor E OS=Mus musculus OX=10090 GN=Il17re PE=1 SV=1
gene10759	2110	46.01	46.03	21.81	3.36	5.73	10.32	-2.21456	1.51741e-07	3.54338e-06	rnf144b	KAE8288419.1	E3 ubiquitin-protein ligase RNF144B [Larimichthys crocea]	GO:0046872;GO:0004842;GO:0016021	metal ion binding;ubiquitin-protein transferase activity;integral component of membrane	K11975	RNF144	http://www.genome.jp/dbget-bin/www_bget?ko:K11975	-	-	KOG1815	Predicted E3 ubiquitin ligase	sp|Q7Z419|R144B_HUMAN	E3 ubiquitin-protein ligase RNF144B OS=Homo sapiens OX=9606 GN=RNF144B PE=1 SV=1
gene7705	2021	2.51	2.48	2.95	0.24	0.54	0.93	-1.8114	0.0011895	0.00745538	fst	XP_030272577.1;XP_029999871.1;XP_029999873.1	follistatin isoform X3 [Sparus aurata];follistatin isoform X1 [Sphaeramia orbicularis];follistatin isoform X3 [Sphaeramia orbicularis]	-	-	K04661	FST	http://www.genome.jp/dbget-bin/www_bget?ko:K04661	TGF-beta signaling pathway	ko04350	KOG3649	FOG: Kazal-type serine protease inhibitor domain	sp|Q9YHV4|FSTA_DANRE	Follistatin-A OS=Danio rerio OX=7955 GN=fsta PE=2 SV=2
novel.3252	5211	3.9	10.53	3.02	0.78	0.92	0.36	-2.48882	0.000107677	0.000995077	Samd9l	XP_027141442.1	sterile alpha motif domain-containing protein 9-like [Larimichthys crocea]	GO:0016021;GO:0005524;GO:0006397;GO:0004540;GO:0106311;GO:0106310;GO:0005789	integral component of membrane;ATP binding;mRNA processing;ribonuclease activity;protein serine/threonine kinase activity;protein serine kinase activity;endoplasmic reticulum membrane	K23949	SAMD9,SAMD9L	http://www.genome.jp/dbget-bin/www_bget?ko:K23949	-	-	-	-	sp|Q69Z37|SAM9L_MOUSE	Sterile alpha motif domain-containing protein 9-like OS=Mus musculus OX=10090 GN=Samd9l PE=1 SV=2
novel.4977	572	7.59	7.38	3.22	1.36	0.18	1.66	-2.16631	0.00616863	0.0286689	-	-	-	-	-	-	-	-	-	-	-	-	-	-
gene15746	893	0.32	1.86	0.99	0.05	0.13	0.27	-3.00619	0.0116468	0.0476251	LOC104931616	TKS86776.1;XP_019110022.1	Adapter protein CIKS [Collichthys lucidus];uncharacterized protein LOC104931616 [Larimichthys crocea]	GO:0016021	integral component of membrane	K21124	TRAF3IP2,ACT1	http://www.genome.jp/dbget-bin/www_bget?ko:K21124	Cellular senescence;IL-17 signaling pathway	ko04218,ko04657	-	-	sp|Q8N7N6|CIKS_MOUSE;sp|O43734|CIKS_HUMAN	E3 ubiquitin ligase TRAF3IP2 OS=Mus musculus OX=10090 GN=Traf3ip2 PE=1 SV=1;E3 ubiquitin ligase TRAF3IP2 OS=Homo sapiens OX=9606 GN=TRAF3IP2 PE=1 SV=3
gene6677	463	20.21	18.13	10.09	2.64	1.66	5.19	-1.99182	0.00056376	0.00399534	pcbd1	XP_034753534.1	pterin-4-alpha-carbinolamine dehydratase [Etheostoma cragini]	GO:0006729;GO:0008124	tetrahydrobiopterin biosynthetic process;4-alpha-hydroxytetrahydrobiopterin dehydratase activity	K01724	PCBD,phhB	http://www.genome.jp/dbget-bin/www_bget?ko:K01724	Folate biosynthesis	ko00790	KOG4073	Pterin carbinolamine dehydratase PCBD/dimerization cofactor of HNF1	sp|O73930|PHS_CHICK	Pterin-4-alpha-carbinolamine dehydratase OS=Gallus gallus OX=9031 GN=PCBD1 PE=2 SV=3
gene6975	2219	1.1	2.89	1.85	0.11	0.14	0.17	-3.41088	7.78594e-07	1.47368e-05	LOC104922209	XP_019123266.1;XP_019123263.1	latent-transforming growth factor beta-binding protein 1 isoform X4 [Larimichthys crocea];latent-transforming growth factor beta-binding protein 1 isoform X3 [Larimichthys crocea]	GO:0005509	calcium ion binding	K19559	LTBP1	http://www.genome.jp/dbget-bin/www_bget?ko:K19559	TGF-beta signaling pathway	ko04350	-	-	sp|Q14766|LTBP1_HUMAN	Latent-transforming growth factor beta-binding protein 1 OS=Homo sapiens OX=9606 GN=LTBP1 PE=1 SV=4
novel.15434	639	1.3	2.06	0.94	0	0.14	0	-4.32587	0.00956161	0.0407182	-	-	-	-	-	-	-	-	-	-	-	-	-	-
gene2770	2547	0.91	2.01	0.61	0	0.09	0	-4.57865	4.58524e-05	0.000484658	prkcb	XP_019130470.1	protein kinase C beta type isoform X1 [Larimichthys crocea]	GO:0106311;GO:0004698;GO:0016020;GO:0008270;GO:0005737;GO:0005524;GO:0035556	protein serine/threonine kinase activity;calcium-dependent protein kinase C activity;membrane;zinc ion binding;cytoplasm;ATP binding;intracellular signal transduction	K19662	PRKCB	http://www.genome.jp/dbget-bin/www_bget?ko:K19662	Focal adhesion;Gap junction;Calcium signaling pathway;ErbB signaling pathway;HIF-1 signaling pathway;MAPK signaling pathway;NF-kappa B signaling pathway;Phosphatidylinositol signaling system;Rap1 signaling pathway;Ras signaling pathway;Sphingolipid signaling pathway;VEGF signaling pathway;Wnt signaling pathway;mTOR signaling pathway;Chemical carcinogenesis - receptor activation;Choline metabolism…	ko04510,ko04540,ko04020,ko04012,ko04066,ko04010,ko04064,ko04070,ko04015,ko04014,ko04071,ko04370,ko04310,ko04150,ko05207,ko05231,ko05206,ko05200,ko05205,ko05214,ko05225,ko05223,ko05415,ko01521,ko04933,ko04931,ko05143,ko05146,ko05140,ko05171,ko05161,ko05163,ko05170,ko05164,ko05022,ko05017,ko05031,ko05032,ko04270,ko04973,ko04971,ko04972,ko04970,ko04925,ko04929,ko04912,ko04935,ko04911,ko04916,ko04921…	KOG0694	Serine/threonine protein kinase	sp|Q7SY24|KPCB_DANRE	Protein kinase C beta type OS=Danio rerio OX=7955 GN=prkcbb PE=2 SV=1
gene15276	1609	42.19	50.73	46.42	1.2	2.96	1.97	-3.97049	2.22793e-14	2.39997e-12	serpinf1	TMS13846.1;XP_019122418.2	Pigment epithelium-derived factor [Larimichthys crocea];pigment epithelium-derived factor [Larimichthys crocea]	GO:0005615	extracellular space	K19614	SERPINF1,PEDF	http://www.genome.jp/dbget-bin/www_bget?ko:K19614	Wnt signaling pathway	ko04310	-	-	sp|Q95121|PEDF_BOVIN	Pigment epithelium-derived factor OS=Bos taurus OX=9913 GN=SERPINF1 PE=1 SV=1
gene1383	7969	0.95	1.06	1.19	0.3	0.35	0.43	-1.14241	0.00740185	0.0331265	slit1	XP_010742834.3;XP_010742827.3	slit homolog 1 protein isoform X5 [Larimichthys crocea];slit homolog 1 protein isoform X4 [Larimichthys crocea]	-	-	K06838	SLIT1	http://www.genome.jp/dbget-bin/www_bget?ko:K06838	Axon guidance	ko04360	KOG4237	Extracellular matrix protein slit, contains leucine-rich and EGF-like repeats	sp|O75093|SLIT1_HUMAN	Slit homolog 1 protein OS=Homo sapiens OX=9606 GN=SLIT1 PE=1 SV=4
gene19441	1951	9.71	6.57	3.38	0.87	0.62	0.73	-2.65657	3.39746e-07	7.19449e-06	nusap1	XP_027130831.1	nucleolar and spindle-associated protein 1 isoform X4 [Larimichthys crocea]	GO:0005634;GO:0005874;GO:0040001;GO:0005819;GO:0005737;GO:0000281;GO:0003677	nucleus;microtubule;establishment of mitotic spindle localization;spindle;cytoplasm;mitotic cytokinesis;DNA binding	-	-	-	-	-	-	-	sp|A1L2F3|NUSAP_DANRE	Nucleolar and spindle-associated protein 1 OS=Danio rerio OX=7955 GN=nusap1 PE=2 SV=2
gene195	2096	128.16	471.81	75.68	30.02	17.88	56.99	-2.34013	8.53859e-05	0.000819969	LOC104936998	XP_010751452.1	keratin, type II cytoskeletal 8 [Larimichthys crocea]	GO:0045095	keratin filament	K07605	KRT2	http://www.genome.jp/dbget-bin/www_bget?ko:K07605	-	-	-	-	sp|Q6NWF6|K2C8_DANRE	Keratin, type II cytoskeletal 8 OS=Danio rerio OX=7955 GN=krt8 PE=1 SV=1
gene17258	4322	21.31	21.36	12.97	5.23	0.99	11.31	-1.49995	0.00805291	0.0354008	LOC104933208	TMS02262.1	Sterile alpha motif domain-containing protein 9-like [Larimichthys crocea]	GO:0042981	regulation of apoptotic process	-	-	-	-	-	-	-	sp|Q8IVG5|SAM9L_HUMAN	Sterile alpha motif domain-containing protein 9-like OS=Homo sapiens OX=9606 GN=SAMD9L PE=1 SV=2
gene4940	3461	5.63	9.15	3.66	1.33	0.84	2.43	-1.67097	6.84466e-05	0.000684356	morc4	XP_010730438.3	MORC family CW-type zinc finger protein 3 [Larimichthys crocea]	GO:0005634;GO:0008270	nucleus;zinc ion binding	K24135	MORC	http://www.genome.jp/dbget-bin/www_bget?ko:K24135	-	-	-	-	sp|Q14149|MORC3_HUMAN	MORC family CW-type zinc finger protein 3 OS=Homo sapiens OX=9606 GN=MORC3 PE=1 SV=3
gene3284	3491	1.82	3.5	1.85	0.51	0.29	0.26	-2.19944	0.000115195	0.00105355	vit	XP_019121781.1;XP_019121783.1;XP_019121779.1	vitrin isoform X3 [Larimichthys crocea];vitrin isoform X5 [Larimichthys crocea];vitrin isoform X1 [Larimichthys crocea]	-	-	K24506	VIT	http://www.genome.jp/dbget-bin/www_bget?ko:K24506	-	-	-	-	sp|Q8VHI5|VITRN_MOUSE	Vitrin OS=Mus musculus OX=10090 GN=Vit PE=1 SV=2
gene10709	2099	5.39	2.59	8.06	1.1	1.58	1.2	-1.57155	0.00948864	0.0404607	LOC104926211	XP_010738321.3	uncharacterized protein KIAA0408 homolog isoform X1 [Larimichthys crocea]	-	-	-	-	-	-	-	-	-	sp|Q6ZU52|K0408_HUMAN	Uncharacterized protein KIAA0408 OS=Homo sapiens OX=9606 GN=KIAA0408 PE=1 SV=1
novel.8759	420	47.66	70.63	43.01	12.91	9.51	34.95	-1.20064	0.00730466	0.0328041	-	-	-	-	-	-	-	-	-	-	-	-	-	-
gene21991	2238	0.72	1.31	0.81	0.11	0.19	0.37	-1.76695	0.0105412	0.0439973	LOC104938246	XP_010752909.3	SH2 domain-containing protein 1B [Larimichthys crocea]	-	-	K07989	SH2D1B,EAT2	http://www.genome.jp/dbget-bin/www_bget?ko:K07989	Natural killer cell mediated cytotoxicity	ko04650	KOG0197	Tyrosine kinases	sp|O14796|SH21B_HUMAN	SH2 domain-containing protein 1B OS=Homo sapiens OX=9606 GN=SH2D1B PE=1 SV=2
gene19189	2617	9.64	7.4	8.42	0.87	0.42	0.36	-3.68712	3.15564e-12	2.19003e-10	il13ra2	TMS14073.1;XP_019133579.1;XP_010749420.2	Interleukin-13 receptor subunit alpha-2 [Larimichthys crocea];interleukin-13 receptor subunit alpha-2 isoform X3 [Larimichthys crocea];interleukin-13 receptor subunit alpha-2 isoform X2 [Larimichthys crocea]	GO:0016021;GO:0004896	integral component of membrane;cytokine receptor activity	K05077	IL13RA2,CD213A2	http://www.genome.jp/dbget-bin/www_bget?ko:K05077	JAK-STAT signaling pathway;Cytokine-cytokine receptor interaction	ko04630,ko04060	-	-	sp|Q95LF0|I13R2_CANLF	Interleukin-13 receptor subunit alpha-2 OS=Canis lupus familiaris OX=9615 GN=IL13RA2 PE=2 SV=1
gene1586	3075	14.45	31.04	12.14	0.96	1.44	1.48	-3.3926	2.61061e-12	1.84802e-10	pkp1	KAE8293510.1	Plakophilin-1 [Larimichthys crocea]	GO:0030057;GO:0005634;GO:0098609	desmosome;nucleus;cell-cell adhesion	K10387	PKP1	http://www.genome.jp/dbget-bin/www_bget?ko:K10387	-	-	KOG1048	Neural adherens junction protein Plakophilin and related Armadillo repeat proteins	sp|P97350|PKP1_MOUSE	Plakophilin-1 OS=Mus musculus OX=10090 GN=Pkp1 PE=1 SV=1
gene21327	2133	79.74	101.22	57.23	9.36	2.18	7.22	-3.54499	9.18713e-14	8.89142e-12	LOC104937540	XP_027129709.1;XP_010752089.3;XP_027129708.1;XP_010752093.2;XP_010752090.3	synaptotagmin-like protein 2 isoform X6 [Larimichthys crocea];synaptotagmin-like protein 2 isoform X1 [Larimichthys crocea];synaptotagmin-like protein 2 isoform X5 [Larimichthys crocea];synaptotagmin-like protein 2 isoform X7 [Larimichthys crocea];synaptotagmin-like protein 2 isoform X3 [Larimichthys crocea]	GO:0031267;GO:0001786;GO:0006886;GO:0070382;GO:0006887	small GTPase binding;phosphatidylserine binding;intracellular protein transport;exocytic vesicle;exocytosis	K17598	SYTL	http://www.genome.jp/dbget-bin/www_bget?ko:K17598	-	-	KOG1028	Ca2+-dependent phospholipid-binding protein Synaptotagmin, required for synaptic vesicle and secretory granule exocytosis	sp|A6QP06|SYTL2_BOVIN	Synaptotagmin-like protein 2 OS=Bos taurus OX=9913 GN=SYTL2 PE=2 SV=1
gene13903	2313	4.37	4.03	2.47	0.85	0.49	1.4	-1.6037	0.0004855	0.00353163	LOC104929630	KAE8289442.1	Zinc finger protein RFP [Larimichthys crocea]	GO:0008270;GO:0016874	zinc ion binding;ligase activity	K12009	TRIM27,RFP	http://www.genome.jp/dbget-bin/www_bget?ko:K12009	-	-	-	-	sp|P14373|TRI27_HUMAN	Zinc finger protein RFP OS=Homo sapiens OX=9606 GN=TRIM27 PE=1 SV=1
gene3881	2042	17.61	16.88	13.08	6.27	2.42	9.77	-1.24963	0.000327645	0.00254156	LOC104918841	KAE8283127.1;TMS14999.1	Brain-specific angiogenesis inhibitor 1-associated protein 2-like protein 1 [Larimichthys crocea];hypothetical protein E3U43_021461 [Larimichthys crocea]	GO:0030833;GO:0046626;GO:0007009	regulation of actin filament polymerization;regulation of insulin receptor signaling pathway;plasma membrane organization	K20127	BAIAP2L1,IRTKS	http://www.genome.jp/dbget-bin/www_bget?ko:K20127	Pathogenic Escherichia coli infection	ko05130	-	-	sp|Q9UHR4|BI2L1_HUMAN;sp|Q3KR97|BI2L1_RAT	Brain-specific angiogenesis inhibitor 1-associated protein 2-like protein 1 OS=Homo sapiens OX=9606 GN=BAIAP2L1 PE=1 SV=2;Brain-specific angiogenesis inhibitor 1-associated protein 2-like protein 1 OS=Rattus norvegicus OX=10116 GN=Baiap2l1 PE=1 SV=1
gene3067	3601	6.15	16.5	4.96	1.84	0.3	2.71	-2.25814	0.000352194	0.00269653	sh3d19	XP_027139101.1;XP_027139102.1	SH3 domain-containing protein 19 isoform X1 [Larimichthys crocea];SH3 domain-containing protein 19 isoform X2 [Larimichthys crocea]	-	-	K23714	SH3D19	http://www.genome.jp/dbget-bin/www_bget?ko:K23714	-	-	KOG4225	Sorbin and SH3 domain-containing protein	sp|Q5HYK7|SH319_HUMAN	SH3 domain-containing protein 19 OS=Homo sapiens OX=9606 GN=SH3D19 PE=1 SV=2
gene21544	1994	2.24	5.33	1.12	0.03	0.09	0.03	-5.28017	2.02992e-08	5.89606e-07	LOC104937774	XP_019124413.1	rap guanine nucleotide exchange factor-like 1 [Larimichthys crocea]	GO:0005085;GO:0007264	guanyl-nucleotide exchange factor activity;small GTPase mediated signal transduction	-	-	-	-	-	KOG2378	cAMP-regulated guanine nucleotide exchange factor	sp|Q5R9B2|RPGFL_PONPY	Rap guanine nucleotide exchange factor-like 1 OS=Pongo pygmaeus OX=9600 GN=RAPGEFL1 PE=2 SV=1
gene21942	1831	1.68	1.8	1.55	0	0	0	-7.62682	1.25489e-08	3.8864e-07	LOC104938193	XP_010752855.1	platelet-derived growth factor subunit A [Larimichthys crocea]	GO:0016020;GO:0008083	membrane;growth factor activity	K04359	PDGFA	http://www.genome.jp/dbget-bin/www_bget?ko:K04359	Regulation of actin cytoskeleton;Focal adhesion;Gap junction;Calcium signaling pathway;JAK-STAT signaling pathway;MAPK signaling pathway;PI3K-Akt signaling pathway;Phospholipase D signaling pathway;Rap1 signaling pathway;Ras signaling pathway;Choline metabolism in cancer;MicroRNAs in cancer;Pathways in cancer;Transcriptional misregulation in cancer;Glioma;Melanoma;Prostate cancer;Fluid shear stre…	ko04810,ko04510,ko04540,ko04020,ko04630,ko04010,ko04151,ko04072,ko04015,ko04014,ko05231,ko05206,ko05200,ko05202,ko05214,ko05218,ko05215,ko05418,ko01521	-	-	sp|P28576|PDGFA_RAT	Platelet-derived growth factor subunit A OS=Rattus norvegicus OX=10116 GN=Pdgfa PE=2 SV=2
gene2149	2632	3.34	3.58	2.26	0.81	0.58	1.5	-1.33149	0.000915166	0.00600322	LOC104938208	XP_019131619.2	zinc finger protein 208 [Larimichthys crocea]	-	-	K09228	KRAB	http://www.genome.jp/dbget-bin/www_bget?ko:K09228	Herpes simplex virus 1 infection	ko05168	-	-	-	-
gene19270	3227	1.45	4.68	2.72	0.23	0.23	0.63	-2.72761	1.59777e-06	2.75671e-05	LOC104935381	KAE8298302.1	Nuclear factor of activated T-cells, cytoplasmic 2 [Larimichthys crocea]	GO:0003677;GO:0005634;GO:0003700	DNA binding;nucleus;DNA-binding transcription factor activity	K17332	NFATC2,NFAT1,NFATP	http://www.genome.jp/dbget-bin/www_bget?ko:K17332	Cellular senescence;VEGF signaling pathway;Wnt signaling pathway;cGMP-PKG signaling pathway;PD-L1 expression and PD-1 checkpoint pathway in cancer;Lipid and atherosclerosis;Yersinia infection;Hepatitis B;Human T-cell leukemia virus 1 infection;Human cytomegalovirus infection;Human immunodeficiency virus 1 infection;Kaposi sarcoma-associated herpesvirus infection;Axon guidance;Osteoclast different…	ko04218,ko04370,ko04310,ko04022,ko05235,ko05417,ko05135,ko05161,ko05166,ko05163,ko05170,ko05167,ko04360,ko04380,ko04921,ko04662,ko04625,ko04650,ko04660,ko04658,ko04659	-	-	sp|Q13469|NFAC2_HUMAN	Nuclear factor of activated T-cells, cytoplasmic 2 OS=Homo sapiens OX=9606 GN=NFATC2 PE=1 SV=2
gene22979	1990	52.87	64.65	14.92	5.89	7	17.47	-1.77952	0.000570399	0.00403662	LOC104939288	XP_010754102.1	ETS-related transcription factor Elf-3 [Larimichthys crocea]	GO:0006366;GO:0043565;GO:0030855;GO:0005634;GO:0006954;GO:0003700	transcription by RNA polymerase II;sequence-specific DNA binding;epithelial cell differentiation;nucleus;inflammatory response;DNA-binding transcription factor activity	K09429	K09429,ELF3	http://www.genome.jp/dbget-bin/www_bget?ko:K09429	-	-	KOG3804	Transcription factor NERF and related proteins, contain ETS domain	sp|Q4V7E1|ELF3_RAT	ETS-related transcription factor Elf-3 OS=Rattus norvegicus OX=10116 GN=Elf3 PE=2 SV=1
novel.12304	257	36.02	24.66	39.85	0	0	0	-5.29486	0.00249884	0.0138071	-	-	-	-	-	-	-	-	-	-	-	-	-	-
gene14550	1000	159.38	170.83	159.54	5.89	2.93	11.27	-4.30236	5.0948e-36	7.42522e-33	LOC104930317	XP_019110575.2;KAE8288056.1;TMS14411.1	collagenase 3 [Larimichthys crocea];Collagenase 3 [Larimichthys crocea];Stromelysin-1 [Larimichthys crocea]	GO:0004222;GO:0030574;GO:0005576;GO:0008270;GO:0031012	metalloendopeptidase activity;collagen catabolic process;extracellular region;zinc ion binding;extracellular matrix	K01394	MMP3	http://www.genome.jp/dbget-bin/www_bget?ko:K01394	TNF signaling pathway;Transcriptional misregulation in cancer;Prostate cancer;Lipid and atherosclerosis;Rheumatoid arthritis;Coronavirus disease - COVID-19;IL-17 signaling pathway	ko04668,ko05202,ko05215,ko05417,ko05323,ko05171,ko04657	-	-	sp|P45452|MMP13_HUMAN;sp|O18927|MMP13_HORSE;sp|O77656|MMP13_BOVIN;sp|P08254|MMP3_HUMAN	Collagenase 3 OS=Homo sapiens OX=9606 GN=MMP13 PE=1 SV=1;Collagenase 3 OS=Equus caballus OX=9796 GN=MMP13 PE=2 SV=1;Collagenase 3 OS=Bos taurus OX=9913 GN=MMP13 PE=2 SV=1;Stromelysin-1 OS=Homo sapiens OX=9606 GN=MMP3 PE=1 SV=2
gene10082	1626	2.41	15.23	4.55	0.57	0.5	0.45	-3.33246	3.16896e-06	4.99772e-05	LOC104925539	XP_010737486.1	transforming growth factor beta-2 proprotein [Larimichthys crocea]	GO:0008083;GO:0051781;GO:0005160;GO:0005615	growth factor activity;positive regulation of cell division;transforming growth factor beta receptor binding;extracellular space	K13376	TGFB2	http://www.genome.jp/dbget-bin/www_bget?ko:K13376	Cell cycle;Cellular senescence;FoxO signaling pathway;Hippo signaling pathway;MAPK signaling pathway;TGF-beta signaling pathway;Cytokine-cytokine receptor interaction;MicroRNAs in cancer;Pathways in cancer;Proteoglycans in cancer;Chronic myeloid leukemia;Colorectal cancer;Gastric cancer;Hepatocellular carcinoma;Pancreatic cancer;Renal cell carcinoma;Diabetic cardiomyopathy;Dilated cardiomyopathy;…	ko04110,ko04218,ko04068,ko04390,ko04010,ko04350,ko04060,ko05206,ko05200,ko05205,ko05220,ko05210,ko05226,ko05225,ko05212,ko05211,ko05415,ko05414,ko05410,ko04933,ko05321,ko05323,ko05152,ko05146,ko05142,ko05140,ko05144,ko05145,ko05161,ko05166,ko04380	KOG3900	Transforming growth factor beta, bone morphogenetic protein and related proteins	sp|Q38L25|TGFB2_MUSPF	Transforming growth factor beta-2 proprotein OS=Mustela putorius furo OX=9669 GN=TGFB2 PE=2 SV=1
gene20747	722	62.91	55.92	25.85	18.7	11.27	31.8	-1.00263	0.00991046	0.0419218	LOC104936919	XP_010751316.1	barrier-to-autointegration factor [Larimichthys crocea]	GO:0005634;GO:0003677	nucleus;DNA binding	K21870	BANF	http://www.genome.jp/dbget-bin/www_bget?ko:K21870	-	-	KOG4233	DNA-bridging protein BAF	sp|Q6P026|BAF_DANRE	Barrier-to-autointegration factor OS=Danio rerio OX=7955 GN=banf1 PE=1 SV=1
gene1230	1599	3.04	6.56	3.39	0.82	0.63	2.19	-1.54727	0.00274671	0.0148684	ccbe1	XP_027138085.1;XP_010740710.2	collagen and calcium-binding EGF domain-containing protein 1 isoform X1 [Larimichthys crocea];collagen and calcium-binding EGF domain-containing protein 1 isoform X2 [Larimichthys crocea]	GO:0005509;GO:0005581	calcium ion binding;collagen trimer	K19638	CCBE1	http://www.genome.jp/dbget-bin/www_bget?ko:K19638	-	-	-	-	sp|A8WGB1|CCBE1_DANRE	Collagen and calcium-binding EGF domain-containing protein 1 OS=Danio rerio OX=7955 GN=ccbe1 PE=1 SV=2
gene209	1001	8.25	8.94	7.01	0.42	0.72	1.53	-2.84692	3.16987e-08	8.76526e-07	LOC104938192	XP_019123109.1	RING finger protein 208 [Larimichthys crocea]	GO:0046872	metal ion binding	-	-	-	-	-	-	-	sp|Q9NXI6|RN186_HUMAN	E3 ubiquitin-protein ligase RNF186 OS=Homo sapiens OX=9606 GN=RNF186 PE=1 SV=1
gene2009	3460	1.99	1.84	1.04	0.68	0.16	0.56	-1.40637	0.0119502	0.0486011	LOC104936926	XP_010751326.3;XP_010751334.3	nucleolar and coiled-body phosphoprotein 1 isoform X1 [Larimichthys crocea];nucleolar and coiled-body phosphoprotein 1 isoform X2 [Larimichthys crocea]	GO:0016021	integral component of membrane	-	-	-	-	-	-	-	-	-
gene11028	4814	0.23	0.95	0.4	0.01	0.01	0	-5.59331	1.10184e-05	0.000144517	fmn1	TMS21158.1	Formin [Larimichthys crocea]	GO:0045010;GO:0008017;GO:0005884	actin nucleation;microtubule binding;actin filament	K10367	FMN1	http://www.genome.jp/dbget-bin/www_bget?ko:K10367	-	-	-	-	sp|Q05858|FMN_CHICK	Formin OS=Gallus gallus OX=9031 GN=LD PE=2 SV=1
gene7768	1114	2.97	5.69	2.22	0.06	0.37	0.46	-3.18605	3.51428e-05	0.000389225	LOC104923043	XP_027142215.1	class II histocompatibility antigen, B-L beta chain [Larimichthys crocea]	GO:0042613;GO:0006955;GO:0019882;GO:0016021	MHC class II protein complex;immune response;antigen processing and presentation;integral component of membrane	K06752	MHC2	http://www.genome.jp/dbget-bin/www_bget?ko:K06752	Phagosome;Cell adhesion molecules;Viral myocarditis;Type I diabetes mellitus;Allograft rejection;Asthma;Autoimmune thyroid disease;Graft-versus-host disease;Inflammatory bowel disease;Rheumatoid arthritis;Systemic lupus erythematosus;Staphylococcus aureus infection;Tuberculosis;Leishmaniasis;Toxoplasmosis;Epstein-Barr virus infection;Herpes simplex virus 1 infection;Human T-cell leukemia virus 1 …	ko04145,ko04514,ko05416,ko04940,ko05330,ko05310,ko05320,ko05332,ko05321,ko05323,ko05322,ko05150,ko05152,ko05140,ko05145,ko05169,ko05168,ko05166,ko05164,ko04612,ko04640,ko04672,ko04658,ko04659	-	-	sp|P06341|HB2A_RAT	Rano class II histocompatibility antigen, A beta chain (Fragment) OS=Rattus norvegicus OX=10116 GN=RT1-B PE=3 SV=1
gene1533	3636	7.42	11.79	3.23	0.99	1.01	2.47	-1.97572	4.90114e-05	0.000512149	LOC104931603	KAE8295257.1	Zinc finger protein 296 [Larimichthys crocea]	-	-	K22045	BCL11A	http://www.genome.jp/dbget-bin/www_bget?ko:K22045	-	-	-	-	sp|Q8WUU4|ZN296_HUMAN	Zinc finger protein 296 OS=Homo sapiens OX=9606 GN=ZNF296 PE=1 SV=1
gene4998	2833	4.59	3.91	2.3	0.57	0.2	1.53	-2.02117	0.000173823	0.00148864	LOC104920061	XP_019110753.2	dipeptidyl peptidase 4-like [Larimichthys crocea]	GO:0004252;GO:0030054;GO:0031258;GO:0045121;GO:0008239;GO:0016021;GO:0016324;GO:0007155	serine-type endopeptidase activity;cell junction;lamellipodium membrane;membrane raft;dipeptidyl-peptidase activity;integral component of membrane;apical plasma membrane;cell adhesion	K01278	DPP4,CD26	http://www.genome.jp/dbget-bin/www_bget?ko:K01278	Protein digestion and absorption	ko04974	KOG2100	Dipeptidyl aminopeptidase	sp|P22411|DPP4_PIG	Dipeptidyl peptidase 4 OS=Sus scrofa OX=9823 GN=DPP4 PE=1 SV=3
gene13194	2145	3.52	8.62	1.66	0.61	0.31	0.78	-2.62345	2.66699e-05	0.000307337	LOC104928883	XP_010741555.3	syntaxin-11 [Larimichthys crocea]	GO:0005484;GO:0006886;GO:0016020;GO:0016192;GO:0005794	SNAP receptor activity;intracellular protein transport;membrane;vesicle-mediated transport;Golgi apparatus	K08487	STX11	http://www.genome.jp/dbget-bin/www_bget?ko:K08487	SNARE interactions in vesicular transport	ko04130	KOG0810	SNARE protein Syntaxin 1 and related proteins	sp|O75558|STX11_HUMAN	Syntaxin-11 OS=Homo sapiens OX=9606 GN=STX11 PE=1 SV=1
novel.20319	1100	4952.49	3215.01	1736.94	41.18	9.22	22.71	-6.6284	3.60907e-32	3.43917e-29	krt13	TMS01701.1	Keratin, type I cytoskeletal 13 [Larimichthys crocea]	GO:0005882;GO:0005198	intermediate filament;structural molecule activity	K07604	KRT1	http://www.genome.jp/dbget-bin/www_bget?ko:K07604	Staphylococcus aureus infection;Estrogen signaling pathway	ko05150,ko04915	-	-	sp|Q8JFQ6|K1C13_ONCMY	Keratin, type I cytoskeletal 13 OS=Oncorhynchus mykiss OX=8022 GN=krt13 PE=2 SV=1
gene23625	804	5.72	2.43	2.34	0.77	0.39	1.05	-1.87087	0.00969855	0.041181	LOC104939977	XP_010754831.3	secreted frizzled-related protein 3, partial [Larimichthys crocea]	-	-	-	-	-	-	-	-	-	sp|Q9IA95|SFRP3_CHICK	Secreted frizzled-related protein 3 OS=Gallus gallus OX=9031 GN=FRZB PE=2 SV=1
gene6651	2155	4.36	11.4	5.99	1.47	0.52	3.6	-1.74785	0.00139051	0.00850646	LOC104921833	XP_019110913.1	PDZ and LIM domain protein 2 [Larimichthys crocea]	GO:0046872	metal ion binding	K23353	PDLIM1_2_3_4	http://www.genome.jp/dbget-bin/www_bget?ko:K23353	-	-	-	-	sp|Q96JY6|PDLI2_HUMAN;sp|Q9GKU1|PDLI2_MACFA	PDZ and LIM domain protein 2 OS=Homo sapiens OX=9606 GN=PDLIM2 PE=1 SV=1;PDZ and LIM domain protein 2 OS=Macaca fascicularis OX=9541 GN=PDLIM2 PE=2 SV=1
gene9729	1180	4.13	11.86	6.17	0.68	0.35	1.79	-2.72802	5.70885e-06	8.19482e-05	sh2d1a	XP_010737037.1	SH2 domain-containing protein 1A [Larimichthys crocea]	-	-	K07990	SH2D1A,SAP	http://www.genome.jp/dbget-bin/www_bget?ko:K07990	Natural killer cell mediated cytotoxicity	ko04650	-	-	sp|O60880|SH21A_HUMAN	SH2 domain-containing protein 1A OS=Homo sapiens OX=9606 GN=SH2D1A PE=1 SV=1
gene8507	3783	0.59	0.97	0.71	0.06	0.1	0.37	-1.865	0.00505373	0.0244219	tshz2	XP_010735351.1	teashirt homolog 2 isoform X1 [Larimichthys crocea]	GO:0048701;GO:0003677;GO:0046872;GO:0010468;GO:0005634	embryonic cranial skeleton morphogenesis;DNA binding;metal ion binding;regulation of gene expression;nucleus	K09236	TSHZ	http://www.genome.jp/dbget-bin/www_bget?ko:K09236	Hippo signaling pathway - fly	ko04391	-	-	sp|Q9NRE2|TSH2_HUMAN	Teashirt homolog 2 OS=Homo sapiens OX=9606 GN=TSHZ2 PE=1 SV=3
gene3846	3082	1.71	2.41	1.8	0.61	0.32	0.46	-1.65738	0.000792111	0.00532574	gaa	XP_019132795.2	lysosomal alpha-glucosidase isoform X1 [Larimichthys crocea]	GO:0016020;GO:0004553;GO:0030246;GO:0005975	membrane;hydrolase activity, hydrolyzing O-glycosyl compounds;carbohydrate binding;carbohydrate metabolic process	K12316	GAA	http://www.genome.jp/dbget-bin/www_bget?ko:K12316	Lysosome;Galactose metabolism;Starch and sucrose metabolism	ko04142,ko00052,ko00500	KOG1065	Maltase glucoamylase and related hydrolases, glycosyl hydrolase family 31	sp|Q9MYM4|LYAG_BOVIN	Lysosomal alpha-glucosidase OS=Bos taurus OX=9913 GN=GAA PE=2 SV=1
gene16886	2303	9.67	9.99	2.52	1.1	0.46	1.24	-2.58129	3.67725e-06	5.6659e-05	LOC104932828	TMS05069.1	Protein regulator of cytokinesis 1 [Larimichthys crocea]	GO:0001578;GO:0032465;GO:0008017;GO:0005856	microtubule bundle formation;regulation of cytokinesis;microtubule binding;cytoskeleton	K16732	PRC1,ASE1,MAP65	http://www.genome.jp/dbget-bin/www_bget?ko:K16732	-	-	KOG4302	Microtubule-associated protein essential for anaphase spindle elongation	sp|Q99K43|PRC1_MOUSE	Protein regulator of cytokinesis 1 OS=Mus musculus OX=10090 GN=Prc1 PE=1 SV=2
gene12737	2166	2.86	9.05	5.54	1.43	0.58	1.74	-1.87681	0.000470582	0.00343867	LOC104928406	XP_019115162.2;XP_010740990.3	FYN-binding protein 1 isoform X2 [Larimichthys crocea];FYN-binding protein 1 isoform X1 [Larimichthys crocea]	-	-	K17698	FYB,ADAP	http://www.genome.jp/dbget-bin/www_bget?ko:K17698	Rap1 signaling pathway;Yersinia infection	ko04015,ko05135	-	-	sp|O15117|FYB1_HUMAN	FYN-binding protein 1 OS=Homo sapiens OX=9606 GN=FYB1 PE=1 SV=2
gene11565	2041	3.69	7.88	6.02	0.29	0.3	0.57	-3.57167	3.91837e-12	2.67442e-10	LOC104927129	XP_010739442.3	UDP-GlcNAc:betaGal beta-1,3-N-acetylglucosaminyltransferase 7 [Larimichthys crocea]	GO:0006486;GO:0000139;GO:0016758;GO:0016021	protein glycosylation;Golgi membrane;hexosyltransferase activity;integral component of membrane	K09664	B3GNT7	http://www.genome.jp/dbget-bin/www_bget?ko:K09664	Glycosaminoglycan biosynthesis - keratan sulfate	ko00533	-	-	sp|Q8NFL0|B3GN7_HUMAN	UDP-GlcNAc:betaGal beta-1,3-N-acetylglucosaminyltransferase 7 OS=Homo sapiens OX=9606 GN=B3GNT7 PE=1 SV=1
gene23340	1266	1.13	2.07	1.64	0	0.12	0.07	-4.44168	8.76954e-05	0.000839571	LOC104939674	XP_027136820.1	beta-1,3-galactosyltransferase 1-like isoform X1 [Larimichthys crocea]	GO:0016758;GO:0000139;GO:0006486;GO:0016021	hexosyltransferase activity;Golgi membrane;protein glycosylation;integral component of membrane	K07820	B3GALT2	http://www.genome.jp/dbget-bin/www_bget?ko:K07820	Glycosphingolipid biosynthesis - lacto and neolacto series	ko00601	-	-	sp|Q5R5Y3|B3GT2_PONAB	Beta-1,3-galactosyltransferase 2 OS=Pongo abelii OX=9601 GN=B3GALT2 PE=2 SV=1
gene2185	5704	4.04	5.09	3.58	1.29	1.1	2.64	-1.0066	0.0018397	0.0107552	LOC104938502	TMS17788.1	Histone-lysine N-methyltransferase, H3 lysine-36 and H4 lysine-20 specific [Larimichthys crocea]	GO:0005634;GO:0046872;GO:0005694;GO:0018024	nucleus;metal ion binding;chromosome;histone-lysine N-methyltransferase activity	K15588	NSD1	http://www.genome.jp/dbget-bin/www_bget?ko:K15588	Lysine degradation	ko00310	-	-	sp|Q96L73|NSD1_HUMAN	Histone-lysine N-methyltransferase, H3 lysine-36 specific OS=Homo sapiens OX=9606 GN=NSD1 PE=1 SV=1
gene13257	2464	46.92	70.05	45.97	3.8	5.33	17.12	-2.39476	5.84136e-08	1.51473e-06	LOC104928941	XP_027136390.1	heat shock cognate 71 kDa protein [Larimichthys crocea]	GO:0016887;GO:0005524	ATP hydrolysis activity;ATP binding	K03283	HSPA1s	http://www.genome.jp/dbget-bin/www_bget?ko:K03283	Endocytosis;MAPK signaling pathway;Protein processing in endoplasmic reticulum;Spliceosome;Lipid and atherosclerosis;Legionellosis;Toxoplasmosis;Measles;Prion disease;Longevity regulating pathway - multiple species;Estrogen signaling pathway;Antigen processing and presentation	ko04144,ko04010,ko04141,ko03040,ko05417,ko05134,ko05145,ko05162,ko05020,ko04213,ko04915,ko04612	KOG0101	Molecular chaperones HSP70/HSC70, HSP70 superfamily	sp|P63017|HSP7C_MOUSE	Heat shock cognate 71 kDa protein OS=Mus musculus OX=10090 GN=Hspa8 PE=1 SV=1
novel.21297	1226	15.27	11.86	6.01	2.22	0.77	3.22	-2.08818	3.30166e-05	0.000369475	-	KAE8301164.1	Deoxycytidylate deaminase [Larimichthys crocea]	GO:0016787;GO:0008270	hydrolase activity;zinc ion binding	-	-	-	-	-	-	-	-	-
gene22740	1133	6.83	4.17	4.4	0.55	0.89	0.84	-3.22007	2.25245e-08	6.49671e-07	LOC104939041	XP_019129566.1;XP_019129567.1	splicing factor 3B subunit 4 isoform X1 [Larimichthys crocea];wiskott-Aldrich syndrome protein homolog isoform X2 [Larimichthys crocea]	-	-	-	-	-	-	-	-	-	-	-
gene14349	2298	0.67	1.81	0.65	0.08	0.03	0.03	-4.11482	2.8672e-05	0.000327513	galnt18	XP_010743108.1	polypeptide N-acetylgalactosaminyltransferase 18 [Larimichthys crocea]	-	-	K00710	GALNT	http://www.genome.jp/dbget-bin/www_bget?ko:K00710	Mucin type O-glycan biosynthesis;Other types of O-glycan biosynthesis	ko00512,ko00514	-	-	sp|Q6P9A2|GLT18_HUMAN	Polypeptide N-acetylgalactosaminyltransferase 18 OS=Homo sapiens OX=9606 GN=GALNT18 PE=2 SV=2
gene23043	1553	3.91	11.46	2.82	0.63	0.44	1.01	-2.76565	7.8896e-06	0.000108777	LOC104939358	TMS01476.1	Dual specificity protein phosphatase 14 [Larimichthys crocea]	GO:0106307;GO:0004725;GO:0106306;GO:0017017;GO:0008138	protein threonine phosphatase activity;protein tyrosine phosphatase activity;protein serine phosphatase activity;MAP kinase tyrosine/serine/threonine phosphatase activity;protein tyrosine/serine/threonine phosphatase activity	K14165	K14165	http://www.genome.jp/dbget-bin/www_bget?ko:K14165	-	-	KOG1716	Dual specificity phosphatase	sp|Q17QM8|DUS14_BOVIN	Dual specificity protein phosphatase 14 OS=Bos taurus OX=9913 GN=DUSP14 PE=2 SV=1
gene16004	1000	10.66	2.65	8.91	1.1	1.73	2.38	-1.73317	0.00685932	0.0312287	LOC104931882	XP_027129022.1	insulin isoform X1 [Larimichthys crocea]	GO:0005576;GO:0016021;GO:0005179;GO:0006006	extracellular region;integral component of membrane;hormone activity;glucose metabolic process	K04526	INS	http://www.genome.jp/dbget-bin/www_bget?ko:K04526	Oocyte meiosis;Regulation of actin cytoskeleton;Autophagy - animal;AMPK signaling pathway;FoxO signaling pathway;HIF-1 signaling pathway;MAPK signaling pathway;PI3K-Akt signaling pathway;Phospholipase D signaling pathway;Rap1 signaling pathway;Ras signaling pathway;cGMP-PKG signaling pathway;mTOR signaling pathway;Prostate cancer;Diabetic cardiomyopathy;Insulin resistance;Maturity onset diabetes …	ko04114,ko04810,ko04140,ko04152,ko04068,ko04066,ko04010,ko04151,ko04072,ko04015,ko04014,ko04022,ko04150,ko05215,ko05415,ko04931,ko04950,ko04932,ko04940,ko04930,ko05010,ko04211,ko04213,ko04911,ko04910,ko04913,ko04914,ko04917,ko04923,ko04960	-	-	sp|P81025|INS_ORENI	Insulin OS=Oreochromis niloticus OX=8128 GN=ins PE=1 SV=2
gene16442	1844	3.32	14.11	5.59	0.59	0.5	0.82	-3.17016	1.06212e-07	2.57863e-06	srpx	XP_019111278.1	sushi repeat-containing protein SRPX [Larimichthys crocea]	-	-	K23818	SRPX	http://www.genome.jp/dbget-bin/www_bget?ko:K23818	-	-	-	-	sp|Q9R0M3|SRPX_MOUSE	Sushi-repeat-containing protein SRPX OS=Mus musculus OX=10090 GN=Srpx PE=2 SV=1
gene11321	4878	2.33	3.31	1.56	0.34	0.35	0.91	-1.84664	2.58073e-05	0.000299453	nlrc3	XP_019131962.2	protein NLRC3 isoform X2 [Larimichthys crocea]	-	-	K22614	NLRC3,NOD3	http://www.genome.jp/dbget-bin/www_bget?ko:K22614	-	-	-	-	sp|Q5DU56|NLRC3_MOUSE	Protein NLRC3 OS=Mus musculus OX=10090 GN=Nlrc3 PE=1 SV=2
gene9649	1680	13.46	19.9	10.55	4.22	1.7	6.08	-1.52742	0.000257913	0.00206597	LOC104925084	XP_010736930.3;XP_010736928.3	uncharacterized protein LOC104925084 isoform X2 [Larimichthys crocea];uncharacterized protein LOC104925084 isoform X1 [Larimichthys crocea]	GO:0008270	zinc ion binding	-	-	-	-	-	-	-	sp|Q3UPF5|ZCCHV_MOUSE	Zinc finger CCCH-type antiviral protein 1 OS=Mus musculus OX=10090 GN=Zc3hav1 PE=1 SV=1
gene11893	3967	0.71	1.82	0.64	0.11	0.16	0.39	-1.93435	0.00228727	0.0128444	LOC104927489	XP_010739881.3	NACHT, LRR and PYD domains-containing protein 12 isoform X1 [Larimichthys crocea]	-	-	-	-	-	-	-	-	-	sp|Q7RTR2|NLRC3_HUMAN	NLR family CARD domain-containing protein 3 OS=Homo sapiens OX=9606 GN=NLRC3 PE=1 SV=2
gene11187	4590	24.31	9.92	83.89	1.15	6.11	4	-2.94319	0.00032681	0.00253746	mybpc1	XP_027127937.1;XP_027127938.1;XP_027127934.1;XP_027127940.1;XP_027127933.1;XP_027127932.1	myosin-binding protein C, slow-type isoform X6 [Larimichthys crocea];myosin-binding protein C, slow-type isoform X7 [Larimichthys crocea];myosin-binding protein C, slow-type isoform X3 [Larimichthys crocea];myosin-binding protein C, slow-type isoform X8 [Larimichthys crocea];myosin-binding protein C, slow-type isoform X2 [Larimichthys crocea];myosin-binding protein C, slow-type isoform X1 [Larimi…	GO:0005886;GO:0016021	plasma membrane;integral component of membrane	K12557	MYBPC1	http://www.genome.jp/dbget-bin/www_bget?ko:K12557	-	-	-	-	sp|Q00872|MYPC1_HUMAN	Myosin-binding protein C, slow-type OS=Homo sapiens OX=9606 GN=MYBPC1 PE=1 SV=2
gene11428	3441	26.31	26.91	15.55	4.59	4.65	2.83	-1.9131	0.00010378	0.00096736	LOC104926975	XP_019110869.1	programmed cell death protein 4 [Larimichthys crocea]	GO:0005737;GO:0045892	cytoplasm;negative regulation of transcription, DNA-templated	K16865	PDCD4	http://www.genome.jp/dbget-bin/www_bget?ko:K16865	MicroRNAs in cancer;Proteoglycans in cancer	ko05206,ko05205	KOG0403	Neoplastic transformation suppressor Pdcd4/MA-3, contains MA3 domain	sp|Q9JID1|PDCD4_RAT	Programmed cell death protein 4 OS=Rattus norvegicus OX=10116 GN=Pdcd4 PE=1 SV=2
gene21098	1543	0.79	1.82	0.33	0.16	0.04	0.04	-3.04668	0.00550194	0.0261242	LOC104937295	XP_027143359.1	serine/threonine-protein kinase DCLK2 [Larimichthys crocea]	-	-	K08805	DCLK1_2	http://www.genome.jp/dbget-bin/www_bget?ko:K08805	-	-	KOG0032	Ca2+/calmodulin-dependent protein kinase, EF-Hand protein superfamily	sp|D2I3C6|DCLK2_AILME	Serine/threonine-protein kinase DCLK2 OS=Ailuropoda melanoleuca OX=9646 GN=DCLK2 PE=3 SV=1
gene7184	4298	7.56	11.49	9.41	1.79	1.44	4.21	-1.62959	7.66475e-06	0.000106269	ptk2b	XP_027140307.1	protein-tyrosine kinase 2-beta [Larimichthys crocea]	GO:0005524;GO:0042127;GO:0007165;GO:0002688;GO:0030500;GO:0031234;GO:0005925;GO:0005856;GO:0030155;GO:0004714;GO:0007172;GO:0045765;GO:0042995;GO:0004715;GO:2000249	ATP binding;regulation of cell population proliferation;signal transduction;regulation of leukocyte chemotaxis;regulation of bone mineralization;extrinsic component of cytoplasmic side of plasma membrane;focal adhesion;cytoskeleton;regulation of cell adhesion;transmembrane receptor protein tyrosine kinase activity;signal complex assembly;regulation of angiogenesis;cell projection;non-membrane spa…	K05871	PTK2B,FAK2	http://www.genome.jp/dbget-bin/www_bget?ko:K05871	Calcium signaling pathway;Phospholipase D signaling pathway;Yersinia infection;Hepatitis B;Human cytomegalovirus infection;Human immunodeficiency virus 1 infection;GnRH signaling pathway;Chemokine signaling pathway;Leukocyte transendothelial migration;Natural killer cell mediated cytotoxicity	ko04020,ko04072,ko05135,ko05161,ko05163,ko05170,ko04912,ko04062,ko04670,ko04650	KOG4257	Focal adhesion tyrosine kinase FAK, contains FERM domain	sp|Q14289|FAK2_HUMAN	Protein-tyrosine kinase 2-beta OS=Homo sapiens OX=9606 GN=PTK2B PE=1 SV=2
novel.8983	2096	1.63	0.62	0.83	0.23	0.06	0.21	-2.26683	0.00380675	0.0194546	-	-	-	-	-	-	-	-	-	-	-	-	-	-
gene3335	2177	1.46	4.18	2.07	0.05	0.14	0.06	-4.42754	2.15183e-08	6.22823e-07	LOC104918263	XP_010728264.2	cytochrome P450 27C1 [Larimichthys crocea]	GO:0016705;GO:0005506;GO:0004497;GO:0020037	oxidoreductase activity, acting on paired donors, with incorporation or reduction of molecular oxygen;iron ion binding;monooxygenase activity;heme binding	K17951	CYP27C1	http://www.genome.jp/dbget-bin/www_bget?ko:K17951	Retinol metabolism	ko00830	-	-	sp|A8WGA0|C27C1_DANRE	Cytochrome P450 27C1 OS=Danio rerio OX=7955 GN=cyp27c1 PE=1 SV=2
gene9237	4887	4.9	5.37	4.11	1.35	1.59	2.05	-1.06345	0.00430635	0.0214633	arhgef10	XP_027130704.1;XP_027130705.1;XP_027130706.1	rho guanine nucleotide exchange factor 10 isoform X1 [Larimichthys crocea];rho guanine nucleotide exchange factor 10 isoform X2 [Larimichthys crocea];rho guanine nucleotide exchange factor 10 isoform X4 [Larimichthys crocea]	GO:0005829;GO:0035023;GO:0005813;GO:0022011;GO:0090307;GO:0005085	cytosol;regulation of Rho protein signal transduction;centrosome;myelination in peripheral nervous system;mitotic spindle assembly;guanyl-nucleotide exchange factor activity	K16727	ARHGEF10	http://www.genome.jp/dbget-bin/www_bget?ko:K16727	-	-	KOG3522	Predicted guanine nucleotide exchange factor	sp|O15013|ARHGA_HUMAN	Rho guanine nucleotide exchange factor 10 OS=Homo sapiens OX=9606 GN=ARHGEF10 PE=1 SV=4
gene16021	1905	2	4.04	1.95	0.75	0.32	0.79	-1.72352	0.00178217	0.0104658	LOC104931904	XP_027132118.1;XP_027132121.1	abl interactor 1-like isoform X1 [Larimichthys crocea];abl interactor 1-like isoform X3 [Larimichthys crocea]	-	-	K23710	ABI3	http://www.genome.jp/dbget-bin/www_bget?ko:K23710	-	-	KOG2546	Abl interactor ABI-1, contains SH3 domain	sp|P62484|ABI2_MOUSE;sp|Q9QZM5|ABI1_RAT	Abl interactor 2 OS=Mus musculus OX=10090 GN=Abi2 PE=1 SV=1;Abl interactor 1 OS=Rattus norvegicus OX=10116 GN=Abi1 PE=1 SV=3
gene18028	1882	0.77	4.21	1.76	0.22	0.03	0.35	-3.20383	0.000113062	0.00104058	entpd3	TMS11364.1	Ectonucleoside triphosphate diphosphohydrolase 3 [Larimichthys crocea]	GO:0016021;GO:0005524;GO:0016787	integral component of membrane;ATP binding;hydrolase activity	K01510	ENTPD1_3_8,CD39	http://www.genome.jp/dbget-bin/www_bget?ko:K01510	Epstein-Barr virus infection;Purine metabolism;Pyrimidine metabolism	ko05169,ko00230,ko00240	KOG1386	Nucleoside phosphatase	sp|O75355|ENTP3_HUMAN	Ectonucleoside triphosphate diphosphohydrolase 3 OS=Homo sapiens OX=9606 GN=ENTPD3 PE=1 SV=2
gene5067	2030	12.02	20.08	7.08	0.62	0.42	1.59	-3.6041	2.1895e-13	1.95837e-11	stard10	XP_010730596.1	START domain-containing protein 10 [Larimichthys crocea]	GO:0008289	lipid binding	K24142	STARD10	http://www.genome.jp/dbget-bin/www_bget?ko:K24142	-	-	KOG2761	START domain-containing proteins involved in steroidogenesis/phosphatidylcholine transfer	sp|Q9JMD3|STA10_MOUSE	START domain-containing protein 10 OS=Mus musculus OX=10090 GN=Stard10 PE=1 SV=1
gene10695	2953	0.66	1	0.57	0.12	0.06	0.19	-2.2883	0.000883941	0.00583547	phc3	XP_019121768.2	polyhomeotic-like protein 3 isoform X2 [Larimichthys crocea]	GO:0003677;GO:0005634;GO:0008270	DNA binding;nucleus;zinc ion binding	K11458	PHC3,EDR3	http://www.genome.jp/dbget-bin/www_bget?ko:K11458	-	-	-	-	sp|Q8NDX5|PHC3_HUMAN	Polyhomeotic-like protein 3 OS=Homo sapiens OX=9606 GN=PHC3 PE=1 SV=1
gene17738	4197	8.38	13.32	6.53	1.43	1.45	1.11	-2.52397	8.1663e-08	2.05618e-06	LOC104933715	XP_027128367.1	protein NLRC5 isoform X2 [Larimichthys crocea]	-	-	K22615	NLRC5,NOD4	http://www.genome.jp/dbget-bin/www_bget?ko:K22615	-	-	-	-	sp|Q86WI3|NLRC5_HUMAN;sp|C6FG12|NLRC5_ICTPU	Protein NLRC5 OS=Homo sapiens OX=9606 GN=NLRC5 PE=1 SV=3;Protein NLRC5 OS=Ictalurus punctatus OX=7998 GN=nlrc5 PE=2 SV=1
novel.19924	724	33.72	49.58	35.37	3.64	1.51	7.51	-2.93002	5.22344e-10	2.27845e-08	TRA	TMS10231.1	hypothetical protein E3U43_002890, partial [Larimichthys crocea]	-	-	K10784	TRAV	http://www.genome.jp/dbget-bin/www_bget?ko:K10784	Calcium signaling pathway;NF-kappa B signaling pathway;Rap1 signaling pathway;Ras signaling pathway;Cell adhesion molecules;PD-L1 expression and PD-1 checkpoint pathway in cancer;Transcriptional misregulation in cancer;Viral myocarditis;Type I diabetes mellitus;Allograft rejection;Asthma;Autoimmune thyroid disease;Graft-versus-host disease;Inflammatory bowel disease;Rheumatoid arthritis;Systemic …	ko04020,ko04064,ko04015,ko04014,ko04514,ko05235,ko05202,ko05416,ko04940,ko05330,ko05310,ko05320,ko05332,ko05321,ko05323,ko05322,ko05150,ko05135,ko05142,ko05144,ko05169,ko05166,ko05170,ko05162,ko04612,ko04672,ko04660,ko04658,ko04659	-	-	sp|P0DSE1|TRAR1_HUMAN	M1-specific T cell receptor alpha chain OS=Homo sapiens OX=9606 GN=TRA PE=1 SV=1
gene13116	1294	15.28	19.5	15.4	3.82	3.93	4.76	-1.57592	2.85358e-05	0.000326259	LOC104928802	KAE8281382.1;XP_010741457.3	Zinc finger protein RFP [Larimichthys crocea];E3 ubiquitin-protein ligase TRIM38 [Larimichthys crocea]	GO:0016021;GO:0008270	integral component of membrane;zinc ion binding	K12009	TRIM27,RFP	http://www.genome.jp/dbget-bin/www_bget?ko:K12009	-	-	-	-	sp|O95361|TRI16_HUMAN	Tripartite motif-containing protein 16 OS=Homo sapiens OX=9606 GN=TRIM16 PE=1 SV=3
gene22958	4223	4.4	6.78	3.64	0.64	0.24	0.62	-2.86631	5.10886e-11	2.70464e-09	LOC104939266	XP_027132396.1	disks large homolog 1-like, partial [Larimichthys crocea]	-	-	K12076	DLG1	http://www.genome.jp/dbget-bin/www_bget?ko:K12076	Tight junction;Hippo signaling pathway;Hippo signaling pathway - fly;Viral carcinogenesis;Human T-cell leukemia virus 1 infection;Human papillomavirus infection;T cell receptor signaling pathway	ko04530,ko04390,ko04391,ko05203,ko05166,ko05165,ko04660	KOG0708	Membrane-associated guanylate kinase MAGUK (contains PDZ, SH3, HOOK and GUK domains)	sp|Q811D0|DLG1_MOUSE;sp|Q5PYH5|DLG1L_DANRE	Disks large homolog 1 OS=Mus musculus OX=10090 GN=Dlg1 PE=1 SV=1;Discs large homolog 1-like protein OS=Danio rerio OX=7955 GN=dlg1l PE=2 SV=1
novel.13428	1037	1.87	2.11	1.81	0.4	0.14	0.58	-2.04198	0.00605385	0.0282202	-	-	-	-	-	-	-	-	-	-	-	-	-	-
gene6071	2351	2.93	2.42	2.38	0.27	0.66	0.38	-2.0199	0.000848392	0.00563835	mtx3	TMS03743.1;XP_010731972.2	Metaxin-3 [Larimichthys crocea];metaxin-3 isoform X2 [Larimichthys crocea]	GO:0015031;GO:0001401	protein transport;SAM complex	K17776	MTX	http://www.genome.jp/dbget-bin/www_bget?ko:K17776	-	-	KOG3028	Translocase of outer mitochondrial membrane complex, subunit TOM37/Metaxin 1	sp|Q4VBW0|MTX3_DANRE	Metaxin-3 OS=Danio rerio OX=7955 GN=mtx3 PE=2 SV=2
gene11696	2580	13.93	16.14	21.22	1.82	1.45	5.78	-2.30604	1.6032e-07	3.71222e-06	LOC104927273	XP_010739615.2	Krueppel-like factor 2 [Larimichthys crocea]	-	-	K17845	KLF2	http://www.genome.jp/dbget-bin/www_bget?ko:K17845	Apelin signaling pathway;FoxO signaling pathway;Fluid shear stress and atherosclerosis	ko04371,ko04068,ko05418	-	-	sp|Q60793|KLF4_MOUSE	Krueppel-like factor 4 OS=Mus musculus OX=10090 GN=Klf4 PE=1 SV=3
gene3190	5042	1.09	1.49	0.54	0.02	0.04	0.09	-4.14495	4.63044e-09	1.60005e-07	b4galnt3	XP_027128400.1	beta-1,4-N-acetylgalactosaminyltransferase 3 isoform X2 [Larimichthys crocea]	GO:0008376;GO:0032580;GO:0005829;GO:0005874;GO:0016021;GO:0003755;GO:0005739;GO:0033842	acetylgalactosaminyltransferase activity;Golgi cisterna membrane;cytosol;microtubule;integral component of membrane;peptidyl-prolyl cis-trans isomerase activity;mitochondrion;N-acetyl-beta-glucosaminyl-glycoprotein 4-beta-N-acetylgalactosaminyltransferase activity	K09656	B4GALNT3	http://www.genome.jp/dbget-bin/www_bget?ko:K09656	Various types of N-glycan biosynthesis	ko00513	-	-	sp|Q6L8S8|B4GN3_MOUSE	Beta-1,4-N-acetylgalactosaminyltransferase 3 OS=Mus musculus OX=10090 GN=B4galnt3 PE=2 SV=1
gene7609	5210	4.01	5.04	3.63	1.37	0.91	2.69	-1.04075	0.00202521	0.0116252	ehmt1	XP_019128405.2;XP_019128407.1	histone-lysine N-methyltransferase EHMT1 isoform X2 [Larimichthys crocea];histone-lysine N-methyltransferase EHMT1 isoform X4 [Larimichthys crocea]	-	-	K11420	EHMT	http://www.genome.jp/dbget-bin/www_bget?ko:K11420	Lysine degradation;Longevity regulating pathway	ko00310,ko04211	KOG1082	Histone H3 (Lys9) methyltransferase SUV39H1/Clr4, required for transcriptional silencing	sp|Q9H9B1|EHMT1_HUMAN	Histone-lysine N-methyltransferase EHMT1 OS=Homo sapiens OX=9606 GN=EHMT1 PE=1 SV=4
novel.9074	1122	0.98	2.41	1.55	0	0	0	-6.72324	4.92255e-06	7.2081e-05	-	-	-	-	-	-	-	-	-	-	-	-	-	-
gene14169	420	3.55	1.87	4.83	0	0	0	-5.21581	0.00386561	0.0196838	LOC104929918	KAE8283585.1	hypothetical protein D5F01_LYC18988 [Larimichthys crocea]	GO:0009395;GO:0004620	phospholipid catabolic process;phospholipase activity	K16342	PLA2G4,CPLA2	http://www.genome.jp/dbget-bin/www_bget?ko:K16342	Necroptosis;MAPK signaling pathway;Phospholipase D signaling pathway;Ras signaling pathway;VEGF signaling pathway;Choline metabolism in cancer;Arachidonic acid metabolism;Ether lipid metabolism;Glycerophospholipid metabolism;Linoleic acid metabolism;alpha-Linolenic acid metabolism;Vascular smooth muscle contraction;GnRH signaling pathway;Ovarian steroidogenesis;Oxytocin signaling pathway;Fc epsil…	ko04217,ko04010,ko04072,ko04014,ko04370,ko05231,ko00590,ko00565,ko00564,ko00591,ko00592,ko04270,ko04912,ko04913,ko04921,ko04664,ko04666,ko04611,ko04724,ko04730,ko04726,ko04750	-	-	sp|Q9UP65|PA24C_HUMAN	Cytosolic phospholipase A2 gamma OS=Homo sapiens OX=9606 GN=PLA2G4C PE=1 SV=2
gene9072	3669	30.98	36.67	12.48	2.71	0.82	4.95	-2.99793	6.47801e-09	2.16306e-07	LOC104924473	XP_019112622.1;XP_019112620.1	NLR family CARD domain-containing protein 3 isoform X2 [Larimichthys crocea];NLR family CARD domain-containing protein 3 isoform X1 [Larimichthys crocea]	-	-	K22614	NLRC3,NOD3	http://www.genome.jp/dbget-bin/www_bget?ko:K22614	-	-	-	-	sp|Q7RTR2|NLRC3_HUMAN	NLR family CARD domain-containing protein 3 OS=Homo sapiens OX=9606 GN=NLRC3 PE=1 SV=2
gene18693	2058	0.43	1.39	0.77	0.03	0.06	0.09	-3.47269	0.000364595	0.00277432	LOC104934761	TMS11023.1	C-C chemokine receptor type 4 [Larimichthys crocea]	-	-	K04179	CCR4,CD194	http://www.genome.jp/dbget-bin/www_bget?ko:K04179	Cytokine-cytokine receptor interaction;Viral protein interaction with cytokine and cytokine receptor;Viral carcinogenesis;Kaposi sarcoma-associated herpesvirus infection;Chemokine signaling pathway	ko04060,ko04061,ko05203,ko05167,ko04062	-	-	sp|P51680|CCR4_MOUSE	C-C chemokine receptor type 4 OS=Mus musculus OX=10090 GN=Ccr4 PE=2 SV=2
gene13330	2658	6.22	6.68	3.73	0.75	0.84	1.78	-1.9999	4.63085e-07	9.40441e-06	casp2	XP_010741737.2;KAE8288941.1;XP_019120880.1;XP_019120881.1	caspase-2 isoform X4 [Larimichthys crocea];Caspase-2 [Larimichthys crocea];caspase-2 isoform X2 [Larimichthys crocea];caspase-2 isoform X3 [Larimichthys crocea]	GO:0043281;GO:0008630;GO:0042981;GO:0043065;GO:0097200	regulation of cysteine-type endopeptidase activity involved in apoptotic process;intrinsic apoptotic signaling pathway in response to DNA damage;regulation of apoptotic process;positive regulation of apoptotic process;cysteine-type endopeptidase activity involved in execution phase of apoptosis	K02186	CASP2	http://www.genome.jp/dbget-bin/www_bget?ko:K02186	Apoptosis	ko04210	KOG3573	Caspase, apoptotic cysteine protease	sp|Q98943|CASP2_CHICK	Caspase-2 OS=Gallus gallus OX=9031 GN=CASP2 PE=2 SV=2
gene4961	5041	0.37	0.43	0.55	0.01	0.07	0.05	-3.00897	0.000240421	0.00194859	LOC104920017	KAE8287926.1	Lysine-specific demethylase 6B [Larimichthys crocea]	GO:0035726;GO:0005634;GO:0007507;GO:0008168;GO:0071558;GO:0032259;GO:0046872;GO:0061384;GO:0060319;GO:0061628;GO:0031101	common myeloid progenitor cell proliferation;nucleus;heart development;methyltransferase activity;histone H3-tri/di-methyl-lysine-27 demethylase activity;methylation;metal ion binding;heart trabecula morphogenesis;primitive erythrocyte differentiation;H3K27me3 modified histone binding;fin regeneration	K11448	KDM6B,JMJD3	http://www.genome.jp/dbget-bin/www_bget?ko:K11448	-	-	-	-	sp|Q5NCY0|KDM6B_MOUSE	Lysine-specific demethylase 6B OS=Mus musculus OX=10090 GN=Kdm6b PE=1 SV=1
gene18582	896	37.91	19.52	31	1.73	1.77	3.22	-3.35764	1.00137e-13	9.57917e-12	LOC104934636	XP_010748648.1	microfibrillar-associated protein 2-like [Larimichthys crocea]	GO:0005576;GO:0001527	extracellular region;microfibril	K25410	MFAP5	http://www.genome.jp/dbget-bin/www_bget?ko:K25410	-	-	-	-	sp|P27424|MFAP2_BOVIN	Microfibrillar-associated protein 2 OS=Bos taurus OX=9913 GN=MFAP2 PE=1 SV=1
gene23187	1333	124.72	126.68	72.2	1.65	2.13	5.27	-4.83758	2.20415e-34	2.60048e-31	aldob	KAE8285956.1	Fructose-bisphosphate aldolase B [Larimichthys crocea]	GO:0006096;GO:0004332	glycolytic process;fructose-bisphosphate aldolase activity	K01623	ALDO	http://www.genome.jp/dbget-bin/www_bget?ko:K01623	HIF-1 signaling pathway;Fructose and mannose metabolism;Glycolysis / Gluconeogenesis;Pentose phosphate pathway	ko04066,ko00051,ko00010,ko00030	KOG1557	Fructose-biphosphate aldolase	sp|P53447|ALDOB_SPAAU	Fructose-bisphosphate aldolase B OS=Sparus aurata OX=8175 GN=aldob PE=2 SV=2
gene7935	2661	0.65	2.67	0.89	0.04	0.04	0.09	-4.3573	3.60076e-07	7.57965e-06	LOC104923228	TMS22601.1	Fc receptor-like protein 5 [Larimichthys crocea]	GO:0005886;GO:0016021	plasma membrane;integral component of membrane	K06727	FCRL,IRTA,CD307	http://www.genome.jp/dbget-bin/www_bget?ko:K06727	-	-	-	-	-	-
gene22021	3609	18.6	36.1	13.68	5.11	2.95	6.72	-1.83041	1.29737e-05	0.000166096	rffl	XP_019133052.1;XP_010752943.1	E3 ubiquitin-protein ligase rififylin isoform X2 [Larimichthys crocea];E3 ubiquitin-protein ligase rififylin isoform X1 [Larimichthys crocea]	GO:0046872	metal ion binding	K20804	RNF34	http://www.genome.jp/dbget-bin/www_bget?ko:K20804	-	-	-	-	sp|Q8CIN9|RFFL_RAT	E3 ubiquitin-protein ligase rififylin OS=Rattus norvegicus OX=10116 GN=Rffl PE=1 SV=1
gene12323	3016	12.65	23.16	6.91	1.06	0.71	2.02	-3.14966	2.06482e-11	1.22095e-09	LOC104927956	XP_010740452.1;XP_010740451.1	1-phosphatidylinositol 4,5-bisphosphate phosphodiesterase delta-1 isoform X2 [Larimichthys crocea];1-phosphatidylinositol 4,5-bisphosphate phosphodiesterase delta-1 isoform X1 [Larimichthys crocea]	GO:0016042;GO:0005509;GO:0035556;GO:0004435	lipid catabolic process;calcium ion binding;intracellular signal transduction;phosphatidylinositol phospholipase C activity	K05857	PLCD	http://www.genome.jp/dbget-bin/www_bget?ko:K05857	Calcium signaling pathway;Phosphatidylinositol signaling system;AGE-RAGE signaling pathway in diabetic complications;Shigellosis;Inositol phosphate metabolism;Thyroid hormone signaling pathway	ko04020,ko04070,ko04933,ko05131,ko00562,ko04919	-	-	sp|P10688|PLCD1_RAT	1-phosphatidylinositol 4,5-bisphosphate phosphodiesterase delta-1 OS=Rattus norvegicus OX=10116 GN=Plcd1 PE=1 SV=1
gene18273	834	8.27	13.72	4.67	2.1	1.03	2.68	-1.80716	0.00100356	0.00647171	LOC104934294	KAE8294975.1	Claudin-6 Skullin [Larimichthys crocea]	GO:0005198;GO:0016021;GO:0005923	structural molecule activity;integral component of membrane;bicellular tight junction	K06087	CLDN	http://www.genome.jp/dbget-bin/www_bget?ko:K06087	Tight junction;Cell adhesion molecules;Pathogenic Escherichia coli infection;Hepatitis C;Leukocyte transendothelial migration	ko04530,ko04514,ko05130,ko05160,ko04670	-	-	sp|Q765N9|CLD3_BOVIN	Claudin-3 OS=Bos taurus OX=9913 GN=CLDN3 PE=2 SV=1
gene7055	1350	18248.4	16322.7	5496.32	1108.24	354.4	957.34	-3.67451	5.5829e-13	4.60646e-11	LOC104922281	XP_010733378.1	keratin, type I cytoskeletal 13 [Larimichthys crocea]	GO:0005882;GO:0005198	intermediate filament;structural molecule activity	K07604	KRT1	http://www.genome.jp/dbget-bin/www_bget?ko:K07604	Staphylococcus aureus infection;Estrogen signaling pathway	ko05150,ko04915	-	-	sp|Q8JFQ6|K1C13_ONCMY	Keratin, type I cytoskeletal 13 OS=Oncorhynchus mykiss OX=8022 GN=krt13 PE=2 SV=1
gene14616	2659	0.7	2.39	1.07	0.07	0.07	0.14	-3.57748	3.35055e-06	5.23742e-05	LOC104930398	XP_019127526.1	tumor necrosis factor receptor superfamily member 16 [Larimichthys crocea]	GO:0048922;GO:0016021;GO:0007165;GO:0006915	posterior lateral line neuromast deposition;integral component of membrane;signal transduction;apoptotic process	K02583	NGFR,TNFRSF16,CD271	http://www.genome.jp/dbget-bin/www_bget?ko:K02583	Apoptosis - multiple species;MAPK signaling pathway;PI3K-Akt signaling pathway;Rap1 signaling pathway;Ras signaling pathway;Cytokine-cytokine receptor interaction;Transcriptional misregulation in cancer;Neurotrophin signaling pathway	ko04215,ko04010,ko04151,ko04015,ko04014,ko04060,ko05202,ko04722	-	-	sp|P18519|TNR16_CHICK	Tumor necrosis factor receptor superfamily member 16 OS=Gallus gallus OX=9031 GN=NGFR PE=2 SV=1
gene8309	911	18.17	16.01	12.55	1.88	0.2	2.89	-3.00834	7.85253e-07	1.48288e-05	LOC104923655	TKS74566.1	Disintegrin and metalloproteinase domain-containing protein 10 [Collichthys lucidus]	GO:0008237;GO:0004222;GO:0007229;GO:0016021	metallopeptidase activity;metalloendopeptidase activity;integrin-mediated signaling pathway;integral component of membrane	K06704	ADAM10,CD156c	http://www.genome.jp/dbget-bin/www_bget?ko:K06704	Epithelial cell signaling in Helicobacter pylori infection;Alzheimer disease;Axon regeneration	ko05120,ko05010,ko04361	-	-	sp|Q8JIY1|ADA10_XENLA	Disintegrin and metalloproteinase domain-containing protein 10 OS=Xenopus laevis OX=8355 GN=adam10 PE=2 SV=1
gene22007	1205	22.76	44.2	12.09	2.16	2.34	5.21	-2.65181	1.19749e-07	2.84731e-06	LOC104938264	XP_027140599.1	E3 ubiquitin-protein ligase TRIM21-like [Larimichthys crocea]	GO:0008270	zinc ion binding	K10651	TRIM21,SSA1	http://www.genome.jp/dbget-bin/www_bget?ko:K10651	Systemic lupus erythematosus	ko05322	-	-	sp|Q61510|TRI25_MOUSE	E3 ubiquitin/ISG15 ligase TRIM25 OS=Mus musculus OX=10090 GN=Trim25 PE=1 SV=2
gene659	2375	9.56	18.19	5.55	1.82	2.29	6.1	-1.38984	0.00518925	0.0249406	mfap3	XP_027129251.1;XP_019120916.2	microfibril-associated glycoprotein 3 isoform X2 [Larimichthys crocea];microfibril-associated glycoprotein 3 isoform X1 [Larimichthys crocea]	GO:0016021;GO:0005886	integral component of membrane;plasma membrane	-	-	-	-	-	-	-	sp|O75121|MFA3L_HUMAN	Microfibrillar-associated protein 3-like OS=Homo sapiens OX=9606 GN=MFAP3L PE=1 SV=3
gene21686	1283	3.11	11.21	8.63	2.03	0.05	0.17	-2.81308	0.00517499	0.0248914	LOC104937928	XP_027132047.1	chymotrypsin-like protease CTRL-1 [Larimichthys crocea]	GO:0005615;GO:0004252	extracellular space;serine-type endopeptidase activity	K09628	PRSS27	http://www.genome.jp/dbget-bin/www_bget?ko:K09628	-	-	-	-	sp|Q9BQR3|PRS27_HUMAN	Serine protease 27 OS=Homo sapiens OX=9606 GN=PRSS27 PE=1 SV=1
gene6507	3321	6.4	10.99	7.1	2.26	1.79	2.94	-1.39965	0.000146983	0.00129603	rgma	XP_010732609.1	repulsive guidance molecule A isoform X1 [Larimichthys crocea]	GO:0031225;GO:0048681;GO:0015026;GO:0030509;GO:0005886	anchored component of membrane;negative regulation of axon regeneration;coreceptor activity;BMP signaling pathway;plasma membrane	K23096	RGMA	http://www.genome.jp/dbget-bin/www_bget?ko:K23096	TGF-beta signaling pathway;Axon guidance	ko04350,ko04360	-	-	sp|Q6PCX7|RGMA_MOUSE	Repulsive guidance molecule A OS=Mus musculus OX=10090 GN=Rgma PE=1 SV=1
novel.12409	626	1.01	5.64	3.9	0	0	0	-6.56681	3.06416e-05	0.000346024	-	XP_019123021.2	uncharacterized protein LOC109140511 [Larimichthys crocea]	GO:0016021	integral component of membrane	-	-	-	-	-	-	-	-	-
gene19186	2315	56.42	74.57	32.26	10.64	7.21	22.77	-1.69065	1.01051e-05	0.000134387	capn6	XP_010749404.1	calpain-5 [Larimichthys crocea]	GO:0004198	calcium-dependent cysteine-type endopeptidase activity	K08574	CAPN5	http://www.genome.jp/dbget-bin/www_bget?ko:K08574	-	-	KOG0045	Cytosolic Ca2+-dependent cysteine protease (calpain), large subunit (EF-Hand protein superfamily)	sp|O08688|CAN5_MOUSE	Calpain-5 OS=Mus musculus OX=10090 GN=Capn5 PE=1 SV=1
gene21472	1991	2.63	3.13	2.54	0.75	0.49	0.81	-1.60727	0.000504161	0.00364703	LOC104937695	XP_010752298.3;TMS05434.1	aryl hydrocarbon receptor nuclear translocator-like protein 2 isoform X2 [Larimichthys crocea];Aryl hydrocarbon receptor nuclear translocator-like protein 2 [Larimichthys crocea]	GO:0007623;GO:0009648;GO:0003677;GO:0005667;GO:0005737;GO:0003700;GO:0046983;GO:0005634	circadian rhythm;photoperiodism;DNA binding;transcription regulator complex;cytoplasm;DNA-binding transcription factor activity;protein dimerization activity;nucleus	K09099	ARNTL2,BMAL2	http://www.genome.jp/dbget-bin/www_bget?ko:K09099	-	-	KOG3561	Aryl-hydrocarbon receptor nuclear translocator	sp|Q8QGQ7|BMAL2_CHICK	Aryl hydrocarbon receptor nuclear translocator-like protein 2 OS=Gallus gallus OX=9031 GN=ARNTL2 PE=1 SV=1
gene1995	2676	7.9	5.07	1.91	0.73	0.31	0.98	-2.52933	6.59163e-06	9.31096e-05	kif2c	XP_010751041.1;XP_010751049.1	kinesin-like protein KIF2C isoform X1 [Larimichthys crocea];kinesin-like protein KIF2C isoform X2 [Larimichthys crocea]	GO:0005524;GO:1990939;GO:0007018;GO:0005874;GO:0008017	ATP binding;microtubule motor activity;microtubule-based movement;microtubule;microtubule binding	K10393	KIF2_24,MCAK	http://www.genome.jp/dbget-bin/www_bget?ko:K10393	Axon regeneration	ko04361	KOG0246	Kinesin-like protein	sp|Q922S8|KIF2C_MOUSE	Kinesin-like protein KIF2C OS=Mus musculus OX=10090 GN=Kif2c PE=1 SV=1
gene15221	1916	15.49	17.78	8.2	1.92	1.82	3.85	-2.07765	1.05609e-07	2.56779e-06	phgdh	KAE8299330.1	D-3-phosphoglycerate dehydrogenase [Larimichthys crocea]	GO:0051287;GO:0004617;GO:0006564	NAD binding;phosphoglycerate dehydrogenase activity;L-serine biosynthetic process	K00058	serA,PHGDH	http://www.genome.jp/dbget-bin/www_bget?ko:K00058	Cysteine and methionine metabolism;Glycine, serine and threonine metabolism	ko00270,ko00260	KOG0068	D-3-phosphoglycerate dehydrogenase, D-isomer-specific 2-hydroxy acid dehydrogenase superfamily	sp|O43175|SERA_HUMAN	D-3-phosphoglycerate dehydrogenase OS=Homo sapiens OX=9606 GN=PHGDH PE=1 SV=4
gene12820	2850	3.01	4.68	1.99	0.74	0.53	0.78	-1.78807	0.000143033	0.00126781	LOC104928480	XP_010741072.1	ephrin-A5b [Larimichthys crocea]	GO:0016301;GO:0046875;GO:0031225;GO:0048013	kinase activity;ephrin receptor binding;anchored component of membrane;ephrin receptor signaling pathway	K05462	EFNA	http://www.genome.jp/dbget-bin/www_bget?ko:K05462	MAPK signaling pathway;PI3K-Akt signaling pathway;Rap1 signaling pathway;Ras signaling pathway;MicroRNAs in cancer;Axon guidance	ko04010,ko04151,ko04015,ko04014,ko05206,ko04360	KOG3858	Ephrin, ligand for Eph receptor tyrosine kinase	sp|P79728|EFNA5_DANRE	Ephrin-A5b OS=Danio rerio OX=7955 GN=efna5b PE=2 SV=1
gene22200	2732	3.33	8.94	4.15	0.11	0.31	0.32	-4.03945	2.234e-11	1.30542e-09	plekha6	TMS19590.1;XP_027135268.1;TKS71232.1	Pleckstrin homology domain-containing family A member 6, partial [Larimichthys crocea];pleckstrin homology domain-containing family A member 6 [Larimichthys crocea];Pleckstrin -like proteiny domain-containing family A member 6 [Collichthys lucidus]	-	-	K23797	PLEKHA4_5_6_7	http://www.genome.jp/dbget-bin/www_bget?ko:K23797	-	-	-	-	sp|Q7TQG1|PKHA6_MOUSE;sp|Q9Y2H5|PKHA6_HUMAN	Pleckstrin homology domain-containing family A member 6 OS=Mus musculus OX=10090 GN=Plekha6 PE=1 SV=1;Pleckstrin homology domain-containing family A member 6 OS=Homo sapiens OX=9606 GN=PLEKHA6 PE=1 SV=4
gene2	4863	9.2	10.89	6.31	2.38	2.05	5.25	-1.11956	0.000801105	0.00537309	LOC104917624	XP_027137261.1	ubiquitin-conjugating enzyme E2 Q2-like [Larimichthys crocea]	-	-	K10582	UBE2Q	http://www.genome.jp/dbget-bin/www_bget?ko:K10582	Ubiquitin mediated proteolysis	ko04120	KOG0897	Predicted ubiquitin-conjugating enzyme	sp|Q7YQJ9|UB2Q2_RABIT	Ubiquitin-conjugating enzyme E2 Q2 OS=Oryctolagus cuniculus OX=9986 GN=UBE2Q2 PE=2 SV=1
gene4367	1811	28.38	29.36	9.65	0.79	0.65	2	-3.98159	2.31485e-16	4.01068e-14	LOC104919360	XP_027135431.1;TMS19447.1;XP_027135434.1	N-acetyllactosaminide alpha-1,3-galactosyltransferase-like isoform X1 [Larimichthys crocea];Zinc finger protein 362 [Larimichthys crocea];N-acetyllactosaminide alpha-1,3-galactosyltransferase-like isoform X3 [Larimichthys crocea]	GO:0005975;GO:0016758;GO:0016020;GO:0016021	carbohydrate metabolic process;hexosyltransferase activity;membrane;integral component of membrane	K20736	A3GALT2	http://www.genome.jp/dbget-bin/www_bget?ko:K20736	Glycosphingolipid biosynthesis - globo and isoglobo series	ko00603	-	-	sp|P14769|GGTA1_BOVIN	N-acetyllactosaminide alpha-1,3-galactosyltransferase OS=Bos taurus OX=9913 GN=GGTA1 PE=1 SV=1
gene13844	1257	4.29	11.26	3.23	1.57	0.27	0.74	-2.40124	0.000830547	0.00553014	chmp4c	TKS87648.1	Charged multivesicular body protein 4c [Collichthys lucidus]	GO:0007034	vacuolar transport	K24782	CHMP4C,SNF7,VPS32C	http://www.genome.jp/dbget-bin/www_bget?ko:K24782	Necroptosis;Endocytosis	ko04217,ko04144	KOG1656	Protein involved in glucose derepression and pre-vacuolar endosome protein sorting	sp|Q569C1|CHM4C_RAT	Charged multivesicular body protein 4c OS=Rattus norvegicus OX=10116 GN=Chmp4c PE=2 SV=1
novel.15062	308	64.39	18.92	10.43	3.1	2.33	2.3	-3.01116	0.00355006	0.0183433	-	-	-	-	-	-	-	-	-	-	-	-	-	-
gene9262	2009	3.36	4.44	3.7	0.65	0.45	1.26	-1.99312	6.40509e-06	9.10457e-05	apex2	XP_019133930.1	DNA-(apurinic or apyrimidinic site) lyase 2 [Larimichthys crocea]	GO:0016829;GO:0006281;GO:0005634;GO:0005739;GO:0008270;GO:0004519;GO:0003677	lyase activity;DNA repair;nucleus;mitochondrion;zinc ion binding;endonuclease activity;DNA binding	K10772	APEX2	http://www.genome.jp/dbget-bin/www_bget?ko:K10772	Base excision repair	ko03410	KOG1294	Apurinic/apyrimidinic endonuclease and related enzymes	sp|Q68G58|APEX2_MOUSE	DNA-(apurinic or apyrimidinic site) endonuclease 2 OS=Mus musculus OX=10090 GN=Apex2 PE=1 SV=1
novel.14949	510	7.41	24.52	9.55	0.65	0.44	0.71	-4.31024	7.5586e-07	1.43549e-05	-	TKS69814.1	Dipeptidase 2 [Collichthys lucidus]	GO:0016021;GO:0005886;GO:0005576;GO:0031225;GO:0070573;GO:0046872;GO:0004983	integral component of membrane;plasma membrane;extracellular region;anchored component of membrane;metallodipeptidase activity;metal ion binding;neuropeptide Y receptor activity	-	-	-	-	-	-	-	-	-
novel.21055	475	13.36	25.58	1.36	0.75	0.52	1.09	-3.63518	0.000310957	0.00242731	-	-	-	-	-	-	-	-	-	-	-	-	-	-
gene13306	2904	12.33	12.92	7.25	1.28	0.46	1.7	-2.90814	5.35928e-12	3.55983e-10	tapbpl	KAE8289356.1	Tapasin [Larimichthys crocea]	GO:0019885;GO:0016021;GO:0005886	antigen processing and presentation of endogenous peptide antigen via MHC class I;integral component of membrane;plasma membrane	-	-	-	-	-	-	-	sp|Q9BX59|TPSNR_HUMAN	Tapasin-related protein OS=Homo sapiens OX=9606 GN=TAPBPL PE=1 SV=2
gene15148	3095	3.65	2.8	3.1	0.34	0.45	1.45	-1.84082	0.000126772	0.00114318	LOC104930965	XP_019118507.2;XP_019118504.2	bromodomain and PHD finger-containing protein 3 isoform X4 [Larimichthys crocea];bromodomain and PHD finger-containing protein 3 isoform X1 [Larimichthys crocea]	GO:0046872;GO:0005634	metal ion binding;nucleus	K11350	BRPF3	http://www.genome.jp/dbget-bin/www_bget?ko:K11350	-	-	KOG0955	PHD finger protein BR140/LIN-49	sp|B2KF05|BRPF3_MOUSE;sp|Q9ULD4|BRPF3_HUMAN	Bromodomain and PHD finger-containing protein 3 OS=Mus musculus OX=10090 GN=Brpf3 PE=1 SV=1;Bromodomain and PHD finger-containing protein 3 OS=Homo sapiens OX=9606 GN=BRPF3 PE=1 SV=2
gene11151	1335	19.72	52.84	24.32	6.81	3.41	6.36	-2.12048	1.73879e-05	0.00021401	LOC104926670	KAE8300025.1	Ras-related protein Rab-3D [Larimichthys crocea]	GO:0003924;GO:0016042;GO:0005525	GTPase activity;lipid catabolic process;GTP binding	K07884	RAB3D	http://www.genome.jp/dbget-bin/www_bget?ko:K07884	Pancreatic secretion	ko04972	KOG0093	GTPase Rab3, small G protein superfamily	sp|P35276|RAB3D_MOUSE	Ras-related protein Rab-3D OS=Mus musculus OX=10090 GN=Rab3d PE=1 SV=1
gene17004	1641	1.69	2.99	1.46	0.04	0.04	0	-5.84888	9.43294e-07	1.73762e-05	trim47	XP_027127866.1	E3 ubiquitin-protein ligase TRIM21-like [Larimichthys crocea]	GO:0008270	zinc ion binding	K12009	TRIM27,RFP	http://www.genome.jp/dbget-bin/www_bget?ko:K12009	-	-	-	-	sp|P19474|RO52_HUMAN	E3 ubiquitin-protein ligase TRIM21 OS=Homo sapiens OX=9606 GN=TRIM21 PE=1 SV=1
novel.21695	405	26.85	56.47	18.54	2.24	5.55	12.28	-1.98186	0.00222894	0.0125681	Asap2	KAE8286484.1	Arf-GAP with SH3 domain [Larimichthys crocea]	GO:0005737;GO:0005096;GO:0043547;GO:0046872	cytoplasm;GTPase activator activity;positive regulation of GTPase activity;metal ion binding	K12488	ASAP	http://www.genome.jp/dbget-bin/www_bget?ko:K12488	Endocytosis;Fc gamma R-mediated phagocytosis	ko04144,ko04666	-	-	sp|Q7SIG6|ASAP2_MOUSE	Arf-GAP with SH3 domain, ANK repeat and PH domain-containing protein 2 OS=Mus musculus OX=10090 GN=Asap2 PE=1 SV=3
novel.12145	7492	1.26	2.18	1.3	0.15	0.16	0.31	-2.56741	3.51312e-09	1.2451e-07	-	TMS22942.1	AP-1 complex subunit mu-2 [Larimichthys crocea]	-	-	-	-	-	-	-	-	-	-	-
gene18279	1872	3.45	8.18	2.9	0.81	0.56	1.15	-2.13006	5.28642e-05	0.000547789	rab32	XP_010748245.1	ras-related protein Rab-32 [Larimichthys crocea]	GO:0003924;GO:0016192;GO:0005802;GO:0016020;GO:0005525;GO:0031982	GTPase activity;vesicle-mediated transport;trans-Golgi network;membrane;GTP binding;vesicle	K07918	RAB32	http://www.genome.jp/dbget-bin/www_bget?ko:K07918	-	-	-	-	sp|Q06AU5|RAB32_PIG	Ras-related protein Rab-32 OS=Sus scrofa OX=9823 GN=RAB32 PE=2 SV=1
gene19923	1748	5.36	5.63	7.45	1.35	1.29	2.35	-1.53789	0.000248583	0.00200289	prrx1	TMS20439.1;TKS75201.1	hypothetical protein E3U43_006932 [Larimichthys crocea];Paired mesoderm homeobox protein 1 [Collichthys lucidus]	GO:0005634;GO:0007275;GO:0000981;GO:0003677	nucleus;multicellular organism development;DNA-binding transcription factor activity, RNA polymerase II-specific;DNA binding	K09329	PRRX,PMX	http://www.genome.jp/dbget-bin/www_bget?ko:K09329	-	-	KOG0484;KOG0490	Transcription factor PHOX2/ARIX, contains HOX domain;Transcription factor, contains HOX domain	sp|P63013|PRRX1_MOUSE	Paired mesoderm homeobox protein 1 OS=Mus musculus OX=10090 GN=Prrx1 PE=1 SV=1
novel.10172	400	9.45	19.4	17.1	1.16	0	2.12	-3.51792	9.89226e-05	0.000931549	-	-	-	-	-	-	-	-	-	-	-	-	-	-
gene2341	4113	2.1	1.99	2.05	0.69	0.34	1.21	-1.16973	0.00447934	0.0221252	ift122	XP_027133028.1	intraflagellar transport protein 122 homolog isoform X2 [Larimichthys crocea]	GO:0060271;GO:0031514	cilium assembly;motile cilium	K19656	IFT122	http://www.genome.jp/dbget-bin/www_bget?ko:K19656	-	-	-	-	sp|Q6NYH1|IF122_DANRE	Intraflagellar transport protein 122 homolog OS=Danio rerio OX=7955 GN=ift122 PE=2 SV=1
novel.21612	1343	0.56	7.64	2.26	0	0	0.1	-6.42014	5.16174e-06	7.51394e-05	-	-	-	-	-	-	-	-	-	-	-	-	-	-
gene5363	1952	28.94	18.07	10.62	3.54	4.84	10.43	-1.26392	0.00528024	0.025299	irf7	KAE8296505.1	Interferon regulatory factor 3 [Larimichthys crocea]	GO:0003700;GO:0000976	DNA-binding transcription factor activity;transcription cis-regulatory region binding	K09447	IRF7	http://www.genome.jp/dbget-bin/www_bget?ko:K09447	Viral carcinogenesis;Lipid and atherosclerosis;Epstein-Barr virus infection;Hepatitis B;Hepatitis C;Herpes simplex virus 1 infection;Influenza A;Kaposi sarcoma-associated herpesvirus infection;Measles;Cytosolic DNA-sensing pathway;NOD-like receptor signaling pathway;RIG-I-like receptor signaling pathway;Toll-like receptor signaling pathway	ko05203,ko05417,ko05169,ko05161,ko05160,ko05168,ko05164,ko05167,ko05162,ko04623,ko04621,ko04622,ko04620	-	-	sp|P70434|IRF7_MOUSE	Interferon regulatory factor 7 OS=Mus musculus OX=10090 GN=Irf7 PE=1 SV=1
gene12277	1466	13.24	18.71	10.6	4.15	0.97	7.59	-1.5125	0.00388467	0.0197551	LOC104927905	KAE8293620.1	Periphilin-1 [Larimichthys crocea]	GO:0045892	negative regulation of transcription, DNA-templated	K21872	PPHLN1	http://www.genome.jp/dbget-bin/www_bget?ko:K21872	-	-	-	-	sp|Q8K2H1|PPHLN_MOUSE	Periphilin-1 OS=Mus musculus OX=10090 GN=Pphln1 PE=1 SV=1
novel.15939	989	1.83	5.41	1.06	0.14	0.22	0.39	-3.06069	0.000718229	0.00491299	IFI44L	XP_019125289.1	interferon-induced protein 44 [Larimichthys crocea]	GO:0046872;GO:0005525;GO:0005765	metal ion binding;GTP binding;lysosomal membrane	-	-	-	-	-	-	-	sp|Q53G44|IF44L_HUMAN	Interferon-induced protein 44-like OS=Homo sapiens OX=9606 GN=IFI44L PE=2 SV=3
gene6729	1191	7.31	17.41	3.69	0.67	0.34	1.09	-3.38227	1.12114e-07	2.69946e-06	acp5	XP_010732922.1	tartrate-resistant acid phosphatase type 5 [Larimichthys crocea]	GO:0046872;GO:0003993	metal ion binding;acid phosphatase activity	K14379	ACP5	http://www.genome.jp/dbget-bin/www_bget?ko:K14379	Lysosome;Rheumatoid arthritis;Riboflavin metabolism;Osteoclast differentiation	ko04142,ko05323,ko00740,ko04380	-	-	sp|Q05117|PPA5_MOUSE	Tartrate-resistant acid phosphatase type 5 OS=Mus musculus OX=10090 GN=Acp5 PE=1 SV=2
gene4431	4524	10.37	19.48	7.19	1.12	1.67	3.49	-2.18951	2.08195e-06	3.4619e-05	LOC104919452	KAE8293319.1;XP_027144719.1	Neural cell adhesion molecule L1-like protein [Larimichthys crocea];neural cell adhesion molecule L1-like protein isoform X2 [Larimichthys crocea]	GO:0016021;GO:0005886	integral component of membrane;plasma membrane	K06758	CHL1	http://www.genome.jp/dbget-bin/www_bget?ko:K06758	-	-	-	-	sp|O00533|NCHL1_HUMAN	Neural cell adhesion molecule L1-like protein OS=Homo sapiens OX=9606 GN=CHL1 PE=1 SV=4
gene3208	3994	1.91	4.89	1.93	0.57	0.27	1.46	-1.69108	0.00209131	0.011925	kiaa1324l	XP_010728060.1	UPF0577 protein KIAA1324-like [Larimichthys crocea]	GO:0005886;GO:0016021	plasma membrane;integral component of membrane	-	-	-	-	-	-	-	sp|A8MWY0|ELAP2_HUMAN	Endosome/lysosome-associated apoptosis and autophagy regulator family member 2 OS=Homo sapiens OX=9606 GN=ELAPOR2 PE=1 SV=2
gene8134	1242	4.94	9.2	3.6	1.61	0.72	3.28	-1.41108	0.0100375	0.0423588	dhrs11	XP_010734835.1	dehydrogenase/reductase SDR family member 11 [Larimichthys crocea]	GO:0016491	oxidoreductase activity	K22970	DHRS11	http://www.genome.jp/dbget-bin/www_bget?ko:K22970	Steroid hormone biosynthesis	ko00140	-	-	sp|Q71R50|DHR11_CHICK	Dehydrogenase/reductase SDR family member 11 OS=Gallus gallus OX=9031 GN=DHRS11 PE=2 SV=1
gene1255	2404	5.9	6.46	4.48	1.02	0.66	3.97	-1.40173	0.00463064	0.0227546	klf4	XP_010740989.3	Krueppel-like factor 4 isoform X1 [Larimichthys crocea]	-	-	K17846	KLF4	http://www.genome.jp/dbget-bin/www_bget?ko:K17846	Signaling pathways regulating pluripotency of stem cells;Chemical carcinogenesis - receptor activation	ko04550,ko05207	-	-	sp|Q60793|KLF4_MOUSE	Krueppel-like factor 4 OS=Mus musculus OX=10090 GN=Klf4 PE=1 SV=3
gene19650	2651	13.29	16.01	10.48	3.16	2.06	6.29	-1.48711	9.46106e-06	0.000126981	LOC104935786	XP_010749980.1;XP_019112810.1	ETS-related transcription factor Elf-1 isoform X2 [Larimichthys crocea];ETS-related transcription factor Elf-1 isoform X1 [Larimichthys crocea]	GO:0005634;GO:0003700;GO:0043565	nucleus;DNA-binding transcription factor activity;sequence-specific DNA binding	K09428	ELF1_2_4	http://www.genome.jp/dbget-bin/www_bget?ko:K09428	Apoptosis - fly	ko04214	KOG3804	Transcription factor NERF and related proteins, contain ETS domain	sp|P32519|ELF1_HUMAN	ETS-related transcription factor Elf-1 OS=Homo sapiens OX=9606 GN=ELF1 PE=1 SV=2
gene2387	1531	48.98	34.9	52.61	10.34	11.66	21.24	-1.30952	0.000440618	0.00325912	LOC104940295	KAE8283270.1	Peripheral myelin protein 22 [Larimichthys crocea]	GO:0005886;GO:0016021	plasma membrane;integral component of membrane	K19289	PMP22	http://www.genome.jp/dbget-bin/www_bget?ko:K19289	-	-	-	-	sp|Q01453|PMP22_HUMAN	Peripheral myelin protein 22 OS=Homo sapiens OX=9606 GN=PMP22 PE=1 SV=1
gene5337	1160	40.18	101.53	26.78	1.31	0.63	1.43	-5.36876	8.3764e-22	3.00773e-19	LOC104920445	XP_027142905.1	coagulation factor XI [Larimichthys crocea]	GO:0005576;GO:0006508	extracellular region;proteolysis	K01324	KLKB1	http://www.genome.jp/dbget-bin/www_bget?ko:K01324	Complement and coagulation cascades	ko04610	-	-	sp|P03951|FA11_HUMAN;sp|Q91Y47|FA11_MOUSE;sp|Q5NTB3|FA11_BOVIN	Coagulation factor XI OS=Homo sapiens OX=9606 GN=F11 PE=1 SV=1;Coagulation factor XI OS=Mus musculus OX=10090 GN=F11 PE=2 SV=2;Coagulation factor XI OS=Bos taurus OX=9913 GN=F11 PE=2 SV=1
gene14088	1471	0.4	1.21	1.61	0.04	0.13	0.05	-3.37852	0.00215627	0.0122279	LOC104929836	XP_027134368.1	ciliary neurotrophic factor receptor subunit alpha-like isoform X2 [Larimichthys crocea]	-	-	K05059	CNTFR	http://www.genome.jp/dbget-bin/www_bget?ko:K05059	JAK-STAT signaling pathway;Cytokine-cytokine receptor interaction	ko04630,ko04060	-	-	sp|P26992|CNTFR_HUMAN	Ciliary neurotrophic factor receptor subunit alpha OS=Homo sapiens OX=9606 GN=CNTFR PE=1 SV=2
gene7899	5180	56.49	60.76	51.76	14.58	13.07	28.09	-1.2534	5.89017e-06	8.43066e-05	ogt	XP_019128081.1;XP_028314607.1;XP_027132269.1;XP_019128077.1;XP_027131986.1;XP_027131859.1;XP_019128082.1	UDP-N-acetylglucosamine--peptide N-acetylglucosaminyltransferase 110 kDa subunit isoform X9 [Larimichthys crocea];UDP-N-acetylglucosamine--peptide N-acetylglucosaminyltransferase 110 kDa subunit isoform X5 [Gouania willdenowi];UDP-N-acetylglucosamine--peptide N-acetylglucosaminyltransferase 110 kDa subunit isoform X11 [Larimichthys crocea];UDP-N-acetylglucosamine--peptide N-acetylglucosaminyltran…	GO:0006493;GO:0097363;GO:0048511;GO:0031966	protein O-linked glycosylation;protein O-GlcNAc transferase activity;rhythmic process;mitochondrial membrane	K09667	OGT	http://www.genome.jp/dbget-bin/www_bget?ko:K09667	Insulin resistance;Other types of O-glycan biosynthesis	ko04931,ko00514	KOG4626	O-linked N-acetylglucosamine transferase OGT	sp|P56558|OGT1_RAT;sp|O15294|OGT1_HUMAN	UDP-N-acetylglucosamine--peptide N-acetylglucosaminyltransferase 110 kDa subunit OS=Rattus norvegicus OX=10116 GN=Ogt PE=1 SV=1;UDP-N-acetylglucosamine--peptide N-acetylglucosaminyltransferase 110 kDa subunit OS=Homo sapiens OX=9606 GN=OGT PE=1 SV=3
gene21503	5012	4.25	3.53	3.96	1.31	0.7	2.42	-1.15415	0.00169981	0.0100368	LOC104937731	XP_019121486.1;TMS14779.1;XP_019121489.1	RNA binding protein fox-1 homolog 2 isoform X2 [Larimichthys crocea];RNA binding protein fox-1-like protein 2 [Larimichthys crocea];RNA binding protein fox-1 homolog 2 isoform X6 [Larimichthys crocea]	GO:0008380;GO:0003723;GO:0005634;GO:0006397;GO:0043484	RNA splicing;RNA binding;nucleus;mRNA processing;regulation of RNA splicing	K14946	RBFOX,FOX	http://www.genome.jp/dbget-bin/www_bget?ko:K14946	-	-	KOG0125	Ataxin 2-binding protein (RRM superfamily)	sp|A4F5G6|RFOX2_XENLA;sp|Q8BP71|RFOX2_MOUSE	RNA binding protein fox-1 homolog 2 OS=Xenopus laevis OX=8355 GN=rbfox2 PE=1 SV=1;RNA binding protein fox-1 homolog 2 OS=Mus musculus OX=10090 GN=Rbfox2 PE=1 SV=2
gene7767	1371	3.52	2.79	1.32	0.28	0.14	0.15	-3.24021	1.75997e-05	0.000215974	LOC104923075	XP_019126235.2	RLA class II histocompatibility antigen, DP alpha-1 chain-like [Larimichthys crocea]	GO:0002250;GO:0042613;GO:0002504	adaptive immune response;MHC class II protein complex;antigen processing and presentation of peptide or polysaccharide antigen via MHC class II	K06752	MHC2	http://www.genome.jp/dbget-bin/www_bget?ko:K06752	Phagosome;Cell adhesion molecules;Viral myocarditis;Type I diabetes mellitus;Allograft rejection;Asthma;Autoimmune thyroid disease;Graft-versus-host disease;Inflammatory bowel disease;Rheumatoid arthritis;Systemic lupus erythematosus;Staphylococcus aureus infection;Tuberculosis;Leishmaniasis;Toxoplasmosis;Epstein-Barr virus infection;Herpes simplex virus 1 infection;Human T-cell leukemia virus 1 …	ko04145,ko04514,ko05416,ko04940,ko05330,ko05310,ko05320,ko05332,ko05321,ko05323,ko05322,ko05150,ko05152,ko05140,ko05145,ko05169,ko05168,ko05166,ko05164,ko04612,ko04640,ko04672,ko04658,ko04659	-	-	sp|P20755|HA2P_RABIT	RLA class II histocompatibility antigen, DP alpha-1 chain (Fragment) OS=Oryctolagus cuniculus OX=9986 PE=3 SV=1
gene8167	1190	4.34	14.26	3.39	0.84	1.49	1.58	-1.98948	0.00233113	0.0130502	LOC104923485	XP_010734891.1	transcription factor Sox-3 [Larimichthys crocea]	GO:1905040;GO:0003677;GO:0000981;GO:0001228;GO:0007417;GO:0007422;GO:0030182;GO:0005634;GO:0051091;GO:0043049	otic placode development;DNA binding;DNA-binding transcription factor activity, RNA polymerase II-specific;DNA-binding transcription activator activity, RNA polymerase II-specific;central nervous system development;peripheral nervous system development;neuron differentiation;nucleus;positive regulation of DNA-binding transcription factor activity;otic placode formation	K09267	SOX1S	http://www.genome.jp/dbget-bin/www_bget?ko:K09267	-	-	KOG0527	HMG-box transcription factor	sp|Q6EJB7|SOX3_DANRE	Transcription factor Sox-3 OS=Danio rerio OX=7955 GN=sox3 PE=1 SV=1
gene19888	1883	4.2	10.39	4.64	0.22	0.49	0.73	-3.33966	5.19449e-09	1.77271e-07	LOC104936035	XP_019123266.1	latent-transforming growth factor beta-binding protein 1 isoform X4 [Larimichthys crocea]	GO:0005509	calcium ion binding	K19559	LTBP1	http://www.genome.jp/dbget-bin/www_bget?ko:K19559	TGF-beta signaling pathway	ko04350	-	-	sp|Q00918|LTBP1_RAT	Latent-transforming growth factor beta-binding protein 1 OS=Rattus norvegicus OX=10116 GN=Ltbp1 PE=1 SV=1
gene13906	3675	0.14	0.65	0.69	0.02	0.02	0.13	-3.06728	0.00269026	0.0146203	LOC104929634	XP_027141428.1	ephrin type-A receptor 4-A-like isoform X2 [Larimichthys crocea]	GO:0005524;GO:0005003;GO:0005887	ATP binding;ephrin receptor activity;integral component of plasma membrane	K05105	EPHA4,SEK,TYRO1	http://www.genome.jp/dbget-bin/www_bget?ko:K05105	Axon guidance	ko04360	-	-	sp|Q91845|EPA4A_XENLA	Ephrin type-A receptor 4-A OS=Xenopus laevis OX=8355 GN=epha4-a PE=2 SV=1
gene3145	679	1.03	1.57	1.52	0.13	0	0.27	-3.36166	0.0107638	0.0447307	LOC104918053	XP_010727972.1	parvalbumin, thymic CPV3-like [Larimichthys crocea]	GO:0005509	calcium ion binding	K23926	PVALB	http://www.genome.jp/dbget-bin/www_bget?ko:K23926	-	-	-	-	sp|P43305|PRVU_CHICK	Parvalbumin, thymic CPV3 OS=Gallus gallus OX=9031 PE=1 SV=2
gene1257	8962	0.74	2.14	1.16	0.29	0.24	0.23	-1.90987	0.00039936	0.00299925	znf462	XP_019131078.2	zinc finger protein 462 [Larimichthys crocea]	-	-	K24853	ZNF462	http://www.genome.jp/dbget-bin/www_bget?ko:K24853	-	-	-	-	sp|B1AWL2|ZN462_MOUSE	Zinc finger protein 462 OS=Mus musculus OX=10090 GN=Znf462 PE=1 SV=1
gene9652	1836	0.53	0.14	0.4	0.03	0	0	-4.44416	0.00861808	0.0374337	kera	XP_019128682.2	keratocan isoform X1 [Larimichthys crocea]	-	-	K08123	KERA	http://www.genome.jp/dbget-bin/www_bget?ko:K08123	-	-	-	-	sp|Q5RI43|KERA_DANRE	Keratocan OS=Danio rerio OX=7955 GN=kera PE=1 SV=1
gene11418	8873	4.17	4.17	3.15	0.93	1.03	1.47	-1.31817	8.32322e-05	0.000801462	tet2	XP_010739237.3	methylcytosine dioxygenase TET2 [Larimichthys crocea]	-	-	K24309	TET2_3	http://www.genome.jp/dbget-bin/www_bget?ko:K24309	-	-	-	-	sp|Q6N021|TET2_HUMAN	Methylcytosine dioxygenase TET2 OS=Homo sapiens OX=9606 GN=TET2 PE=1 SV=3
gene22732	1591	21.84	39.62	16.71	3.83	4.59	12	-1.62732	0.000221198	0.00182255	LOC104939032	XP_027142453.1;XP_027142450.1	bcl-2/adenovirus E1B 19 kDa-interacting protein 2-like protein isoform X2 [Larimichthys crocea];bcl-2/adenovirus E1B 19 kDa-interacting protein 2-like protein isoform X1 [Larimichthys crocea]	-	-	K18448	BNIP2	http://www.genome.jp/dbget-bin/www_bget?ko:K18448	-	-	KOG4406	CDC42 Rho GTPase-activating protein	sp|Q99JU7|BNIPL_MOUSE	Bcl-2/adenovirus E1B 19 kDa-interacting protein 2-like protein OS=Mus musculus OX=10090 GN=Bnipl PE=2 SV=1
gene13912	1968	7.43	13.46	4.64	1.47	0.24	1.02	-2.81228	4.05886e-06	6.13934e-05	LOC104929638	TMS09525.1;XP_027141247.1	GRAM domain-containing protein 2B [Larimichthys crocea];GRAM domain-containing protein 2B-like isoform X2 [Larimichthys crocea]	GO:0016021	integral component of membrane	-	-	-	-	-	KOG1032	Uncharacterized conserved protein, contains GRAM domain	sp|Q96HH9|GRM2B_HUMAN	GRAM domain-containing protein 2B OS=Homo sapiens OX=9606 GN=GRAMD2B PE=1 SV=1
gene11902	1913	18.74	24.78	10.36	2.36	0.99	5.9	-2.44938	1.87519e-07	4.282e-06	LOC104927499	XP_019121125.1;TMS07089.1	mitogen-activated protein kinase kinase kinase kinase 5 [Larimichthys crocea];Mitogen-activated protein kinase kinase kinase kinase 5 [Larimichthys crocea]	GO:0005524;GO:0008349;GO:0106310;GO:0106311	ATP binding;MAP kinase kinase kinase kinase activity;protein serine kinase activity;protein serine/threonine kinase activity	K08833	MAP4K5,KHS1	http://www.genome.jp/dbget-bin/www_bget?ko:K08833	-	-	KOG0576	Mitogen-activated protein kinase kinase kinase kinase (MAP4K), germinal center kinase family	sp|Q8BPM2|M4K5_MOUSE;sp|Q924I2|M4K3_RAT	Mitogen-activated protein kinase kinase kinase kinase 5 OS=Mus musculus OX=10090 GN=Map4k5 PE=1 SV=2;Mitogen-activated protein kinase kinase kinase kinase 3 OS=Rattus norvegicus OX=10116 GN=Map4k3 PE=1 SV=2
gene9035	2185	1.46	0.56	0.69	0.14	0.19	0.18	-1.96051	0.0108578	0.0450608	hoxd3	XP_027146617.1	homeobox protein Hox-D3 [Larimichthys crocea]	GO:0003677;GO:0000981;GO:0007275;GO:0005634	DNA binding;DNA-binding transcription factor activity, RNA polymerase II-specific;multicellular organism development;nucleus	K09303	HOX_3	http://www.genome.jp/dbget-bin/www_bget?ko:K09303	-	-	-	-	sp|A8DT10|HXD3_HAPBU	Homeobox protein Hox-D3 OS=Haplochromis burtoni OX=8153 GN=hoxd3a PE=3 SV=1
novel.18258	1233	1.24	2.91	0.07	0	0.11	0.06	-4.09712	0.00436579	0.0217028	-	-	-	-	-	-	-	-	-	-	-	-	-	-
gene16121	1518	0.33	3.85	1.17	0	0.04	0	-6.39765	2.9726e-05	0.00033753	LOC104932006	KAE8298715.1	25-hydroxyvitamin D-1 alpha hydroxylase, mitochondrial [Larimichthys crocea]	GO:0005506;GO:0016705;GO:0004497;GO:0020037	iron ion binding;oxidoreductase activity, acting on paired donors, with incorporation or reduction of molecular oxygen;monooxygenase activity;heme binding	K07438	CYP27B1	http://www.genome.jp/dbget-bin/www_bget?ko:K07438	Tuberculosis;Steroid biosynthesis;Parathyroid hormone synthesis, secretion and action	ko05152,ko00100,ko04928	KOG0159	Cytochrome P450 CYP11/CYP12/CYP24/CYP27 subfamilies	sp|O15528|CP27B_HUMAN	25-hydroxyvitamin D-1 alpha hydroxylase, mitochondrial OS=Homo sapiens OX=9606 GN=CYP27B1 PE=1 SV=1
novel.17972	594	1.52	2.13	1.98	0	0	0.2	-4.51059	0.00536371	0.0256349	-	XP_027147405.1	uncharacterized protein LOC109140109 [Larimichthys crocea]	GO:0005886;GO:0016021	plasma membrane;integral component of membrane	-	-	-	-	-	-	-	-	-
gene15444	3512	2.69	6.12	2.35	0.31	1.15	0.9	-2.06387	1.37348e-05	0.00017472	LOC104931286	XP_010794412.1;XP_027135296.1	PREDICTED: disco-interacting protein 2 homolog B-A-like [Notothenia coriiceps];disco-interacting protein 2 homolog B-A-like isoform X4 [Larimichthys crocea]	-	-	K24908	DIP2B	http://www.genome.jp/dbget-bin/www_bget?ko:K24908	-	-	KOG3628	Predicted AMP-binding protein	sp|Q6NVJ5|DI2BA_DANRE	Disco-interacting protein 2 homolog B-A OS=Danio rerio OX=7955 GN=dip2ba PE=2 SV=1
gene11013	971	2.98	4.24	1.63	0.46	0.15	0.24	-2.9367	0.000299779	0.00235551	LOC104926543	KAE8300673.1;TMS23441.1	hypothetical protein D5F01_LYC00820 [Larimichthys crocea];Zinc finger protein Gfi-1 [Larimichthys crocea]	GO:0030097;GO:0051569;GO:0006355	hemopoiesis;regulation of histone H3-K4 methylation;regulation of transcription, DNA-templated	K09223	GFI1	http://www.genome.jp/dbget-bin/www_bget?ko:K09223	-	-	-	-	-	-
gene2462	1902	0.71	0.95	11.68	0.22	0.15	0.14	-4.38412	2.47872e-05	0.000289956	LOC104940381	KAE8299540.1;KAE8299541.1	Collagen alpha-3(VI) chain Precursor [Larimichthys crocea];Collagen alpha-3(VI) chain Precursor [Larimichthys crocea]	GO:0007155;GO:0004867;GO:0005581	cell adhesion;serine-type endopeptidase inhibitor activity;collagen trimer	K06238	COL6A	http://www.genome.jp/dbget-bin/www_bget?ko:K06238	Focal adhesion;PI3K-Akt signaling pathway;ECM-receptor interaction;Human papillomavirus infection;Protein digestion and absorption	ko04510,ko04151,ko04512,ko05165,ko04974	-	-	sp|P15989|CO6A3_CHICK;sp|P12111|CO6A3_HUMAN	Collagen alpha-3(VI) chain OS=Gallus gallus OX=9031 GN=COL6A3 PE=2 SV=2;Collagen alpha-3(VI) chain OS=Homo sapiens OX=9606 GN=COL6A3 PE=1 SV=5
gene18622	1959	1.72	3.89	0.74	0.09	0	0.13	-4.49641	1.46388e-06	2.55958e-05	LOC104934680	XP_010748702.3	synaptic vesicle 2-related protein [Larimichthys crocea]	GO:0022857;GO:0030837;GO:0106306;GO:0004725;GO:0106307;GO:0016021;GO:0003779;GO:0008138;GO:0005856	transmembrane transporter activity;negative regulation of actin filament polymerization;protein serine phosphatase activity;protein tyrosine phosphatase activity;protein threonine phosphatase activity;integral component of membrane;actin binding;protein tyrosine/serine/threonine phosphatase activity;cytoskeleton	-	-	-	-	-	KOG0253	Synaptic vesicle transporter SV2 (major facilitator superfamily)	sp|Q8BFT9|SVOP_MOUSE	Synaptic vesicle 2-related protein OS=Mus musculus OX=10090 GN=Svop PE=1 SV=1
gene19463	1132	0.62	0.94	1.13	0	0	0.06	-4.92865	0.00150061	0.009046	sostdc1	KAE8289224.1	Sclerostin domain-containing protein 1 Precursor [Larimichthys crocea]	GO:0016055;GO:0005615	Wnt signaling pathway;extracellular space	-	-	-	-	-	-	-	sp|Q9CQN4|SOSD1_MOUSE	Sclerostin domain-containing protein 1 OS=Mus musculus OX=10090 GN=Sostdc1 PE=1 SV=1
gene3612	1827	22.76	13.67	16.28	4.25	4.42	6.8	-1.36423	0.00026667	0.00212513	rdh8	XP_029946414.1	retinol dehydrogenase 8-like [Salarias fasciatus]	GO:0005737;GO:0016491;GO:0004303;GO:0006703	cytoplasm;oxidoreductase activity;estradiol 17-beta-dehydrogenase activity;estrogen biosynthetic process	K11150	RDH8	http://www.genome.jp/dbget-bin/www_bget?ko:K11150	Retinol metabolism	ko00830	KOG1205	Predicted dehydrogenase	sp|Q9N126|RDH8_BOVIN	Retinol dehydrogenase 8 OS=Bos taurus OX=9913 GN=RDH8 PE=1 SV=1
gene18078	1614	1.38	4.56	1.21	0.56	0.29	0.49	-2.02425	0.00461637	0.022698	LOC104934086	XP_027128937.1	E3 ubiquitin-protein ligase TRIM21 isoform X3 [Larimichthys crocea]	GO:0008270	zinc ion binding	K10651	TRIM21,SSA1	http://www.genome.jp/dbget-bin/www_bget?ko:K10651	Systemic lupus erythematosus	ko05322	-	-	sp|P19474|RO52_HUMAN	E3 ubiquitin-protein ligase TRIM21 OS=Homo sapiens OX=9606 GN=TRIM21 PE=1 SV=1
gene12368	1306	5.06	4.79	8.02	0.24	0.76	0.7	-2.96466	1.9211e-06	3.2401e-05	LOC104928003	TMS19660.1	Neuroblastoma suppressor of tumorigenicity 1 [Larimichthys crocea]	GO:0005576	extracellular region	K19558	NBL1	http://www.genome.jp/dbget-bin/www_bget?ko:K19558	TGF-beta signaling pathway	ko04350	-	-	sp|Q6NZ13|NBL1_DANRE	Neuroblastoma suppressor of tumorigenicity 1 OS=Danio rerio OX=7955 GN=nbl1 PE=2 SV=1
gene10859	682	550.22	53.42	821.05	18.97	91.3	37.71	-2.68748	0.00220181	0.0124378	myl2	XP_010738509.1	myosin regulatory light chain 2, ventricular/cardiac muscle isoform [Larimichthys crocea]	GO:0005509	calcium ion binding	K10351	MYL2	http://www.genome.jp/dbget-bin/www_bget?ko:K10351	Regulation of actin cytoskeleton;Focal adhesion;Tight junction;Apelin signaling pathway;Dilated cardiomyopathy;Hypertrophic cardiomyopathy;Salmonella infection;Shigellosis;Adrenergic signaling in cardiomyocytes;Cardiac muscle contraction;Leukocyte transendothelial migration	ko04810,ko04510,ko04530,ko04371,ko05414,ko05410,ko05132,ko05131,ko04261,ko04260,ko04670	-	-	sp|P08733|MLRV_RAT	Myosin regulatory light chain 2, ventricular/cardiac muscle isoform OS=Rattus norvegicus OX=10116 GN=Myl2 PE=1 SV=2
gene21857	2561	4.6	8.07	3.45	1.35	0.85	1.66	-1.65184	0.000158741	0.00138193	tec	XP_019113334.1	tyrosine-protein kinase Tec [Larimichthys crocea]	GO:0035556;GO:0005524;GO:0004714;GO:0004715;GO:0002250;GO:0046872	intracellular signal transduction;ATP binding;transmembrane receptor protein tyrosine kinase activity;non-membrane spanning protein tyrosine kinase activity;adaptive immune response;metal ion binding	K07364	TEC	http://www.genome.jp/dbget-bin/www_bget?ko:K07364	MAPK signaling pathway - fly;Osteoclast differentiation;T cell receptor signaling pathway	ko04013,ko04380,ko04660	-	-	sp|P42680|TEC_HUMAN	Tyrosine-protein kinase Tec OS=Homo sapiens OX=9606 GN=TEC PE=1 SV=2
gene11727	1699	2.37	5.15	3.79	0.47	0.59	2.04	-1.64352	0.00371963	0.0190725	LOC104927308	XP_010739652.3	uncharacterized protein LOC104927308 [Larimichthys crocea]	GO:0005886	plasma membrane	-	-	-	-	-	-	-	-	-
gene13338	5971	29.91	29.77	16.32	4.97	2.99	13.44	-1.59734	9.99692e-05	0.000938755	LOC104929024	XP_010741744.3;XP_019120901.2	trichohyalin isoform X1 [Larimichthys crocea];trichohyalin isoform X3 [Larimichthys crocea]	GO:0005085;GO:0035556	guanyl-nucleotide exchange factor activity;intracellular signal transduction	K20684	ARHGEF5	http://www.genome.jp/dbget-bin/www_bget?ko:K20684	-	-	KOG3523	Putative guanine nucleotide exchange factor TIM	sp|Q12774|ARHG5_HUMAN	Rho guanine nucleotide exchange factor 5 OS=Homo sapiens OX=9606 GN=ARHGEF5 PE=1 SV=3
gene14969	2354	8.01	16.39	7.84	1.66	1.54	3.87	-1.85836	1.10933e-05	0.000145346	LOC104930761	KAE8293111.1	hypothetical protein D5F01_LYC08213 [Larimichthys crocea]	GO:0016021;GO:0030368	integral component of membrane;interleukin-17 receptor activity	K05167	IL17RD,SEF	http://www.genome.jp/dbget-bin/www_bget?ko:K05167	-	-	-	-	sp|Q8QHJ9|I17RD_DANRE	Interleukin-17 receptor D OS=Danio rerio OX=7955 GN=il17rd PE=1 SV=2
gene8907	5164	9.49	8.05	4.23	1.49	0.8	1.51	-2.11119	5.0482e-07	1.01357e-05	mgea5	XP_027133272.1;XP_027133273.1;XP_027133274.1;XP_027133270.1;XP_027133271.1	protein O-GlcNAcase isoform X3 [Larimichthys crocea];protein O-GlcNAcase isoform X4 [Larimichthys crocea];protein O-GlcNAcase isoform X5 [Larimichthys crocea];protein O-GlcNAcase isoform X1 [Larimichthys crocea];protein O-GlcNAcase isoform X2 [Larimichthys crocea]	GO:0016798;GO:0008152	hydrolase activity, acting on glycosyl bonds;metabolic process	K15719	NCOAT,MGEA5	http://www.genome.jp/dbget-bin/www_bget?ko:K15719	Insulin resistance	ko04931	-	-	sp|O60502|OGA_HUMAN	Protein O-GlcNAcase OS=Homo sapiens OX=9606 GN=OGA PE=1 SV=2
gene428	2213	20.95	34.13	13.9	2.19	0.84	2.97	-3.18333	1.10514e-12	8.50342e-11	sord	KAE8296992.1	Sorbitol dehydrogenase [Larimichthys crocea]	GO:0016491;GO:0008270	oxidoreductase activity;zinc ion binding	K00008	SORD,gutB	http://www.genome.jp/dbget-bin/www_bget?ko:K00008	Fructose and mannose metabolism;Pentose and glucuronate interconversions	ko00051,ko00040	KOG0024	Sorbitol dehydrogenase	sp|Q58D31|DHSO_BOVIN	Sorbitol dehydrogenase OS=Bos taurus OX=9913 GN=SORD PE=1 SV=3
gene782	1169	1.19	2.34	1.16	0.23	0	0.06	-3.55854	0.000916429	0.00600832	LOC104923170	TKS84520.1;XP_010734486.1	Calsenilin A-type potassium channel modulatory protein 3 DRE-antagonist modulator [Collichthys lucidus];calsenilin isoform X1 [Larimichthys crocea]	GO:0005509	calcium ion binding	K23855	KCNIP	http://www.genome.jp/dbget-bin/www_bget?ko:K23855	-	-	KOG0044	Ca2+ sensor (EF-Hand superfamily)	sp|Q9JM47|CSEN_RAT;sp|Q9Y2W7|CSEN_HUMAN	Calsenilin OS=Rattus norvegicus OX=10116 GN=Kcnip3 PE=1 SV=1;Calsenilin OS=Homo sapiens OX=9606 GN=KCNIP3 PE=1 SV=1
gene1636	4551	5.39	3.97	3.48	0.92	0.86	1.82	-1.4838	2.46094e-05	0.000288149	LOC104932417	XP_010745930.2	extended synaptotagmin-1 [Larimichthys crocea]	GO:0006869;GO:0005789;GO:0008289;GO:0061817;GO:0005886;GO:0016021	lipid transport;endoplasmic reticulum membrane;lipid binding;endoplasmic reticulum-plasma membrane tethering;plasma membrane;integral component of membrane	-	-	-	-	-	KOG1012	Ca2+-dependent lipid-binding protein CLB1/vesicle protein vp115/Granuphilin A, contains C2 domain	sp|Q5RAG2|ESYT1_PONAB	Extended synaptotagmin-1 OS=Pongo abelii OX=9601 GN=ESYT1 PE=2 SV=2
gene15869	2671	1.96	3.65	3.79	1.06	0.6	1.42	-1.26775	0.00644532	0.0296976	LOC104931744	XP_020481088.1;XP_027137206.1;TMS01183.1	rho GTPase-activating protein 18-like isoform X4 [Monopterus albus];rho GTPase-activating protein 40 isoform X1 [Larimichthys crocea];Rho GTPase-activating protein 28 [Larimichthys crocea]	-	-	K20639	ARHGAP18_28_40	http://www.genome.jp/dbget-bin/www_bget?ko:K20639	-	-	-	-	sp|Q8K0Q5|RHG18_MOUSE;sp|Q8N392|RHG18_HUMAN	Rho GTPase-activating protein 18 OS=Mus musculus OX=10090 GN=Arhgap18 PE=1 SV=1;Rho GTPase-activating protein 18 OS=Homo sapiens OX=9606 GN=ARHGAP18 PE=1 SV=3
gene15007	1935	2.71	2.3	1.12	0.28	0.22	0.64	-2.09561	0.000363461	0.0027674	LOC104930807	KAE8282306.1	Cyclic GMP-AMP synthase [Larimichthys crocea]	GO:0035060;GO:0006338;GO:0016021;GO:0003677;GO:0016514	brahma complex;chromatin remodeling;integral component of membrane;DNA binding;SWI/SNF complex	K17834	MB21D1	http://www.genome.jp/dbget-bin/www_bget?ko:K17834	Shigellosis;Coronavirus disease - COVID-19;Herpes simplex virus 1 infection;Human cytomegalovirus infection;Human immunodeficiency virus 1 infection;Cytosolic DNA-sensing pathway	ko05131,ko05171,ko05168,ko05163,ko05170,ko04623	-	-	sp|Q8C6L5|CGAS_MOUSE	Cyclic GMP-AMP synthase OS=Mus musculus OX=10090 GN=Cgas PE=1 SV=1
gene3105	6222	0.66	0.4	0.71	0	0.02	0.02	-5.25527	3.3768e-08	9.27535e-07	LOC104918039	XP_022609542.1	Down syndrome cell adhesion molecule-like protein 1 homolog [Seriola dumerili]	-	-	K06768	DSCAML1	http://www.genome.jp/dbget-bin/www_bget?ko:K06768	-	-	-	-	sp|Q8TD84|DSCL1_HUMAN	Down syndrome cell adhesion molecule-like protein 1 OS=Homo sapiens OX=9606 GN=DSCAML1 PE=1 SV=2
gene21913	1629	26.16	37.22	16.05	3.5	2.34	6.02	-2.45952	7.04083e-10	2.98705e-08	LOC104938157	XP_027131491.1;XP_027131493.1	deoxyribonuclease-1-like 2 isoform X1 [Larimichthys crocea];deoxyribonuclease-1-like 2 isoform X3 [Larimichthys crocea]	GO:0004536;GO:0006308;GO:0004519;GO:0016021	deoxyribonuclease activity;DNA catabolic process;endonuclease activity;integral component of membrane	K11995	DNASE1L	http://www.genome.jp/dbget-bin/www_bget?ko:K11995	-	-	-	-	sp|Q13609|DNSL3_HUMAN;sp|Q9D1G0|DNSL2_MOUSE	Deoxyribonuclease gamma OS=Homo sapiens OX=9606 GN=DNASE1L3 PE=1 SV=1;Deoxyribonuclease-1-like 2 OS=Mus musculus OX=10090 GN=Dnase1l2 PE=2 SV=1
gene10289	861	1.62	8.51	1.52	0.17	0	0.66	-3.60017	0.000698685	0.00479918	LOC104925772	XP_027143715.1	uncharacterized protein LOC104925772 isoform X2 [Larimichthys crocea]	GO:0006869;GO:0005576;GO:0008289;GO:0042157	lipid transport;extracellular region;lipid binding;lipoprotein metabolic process	-	-	-	-	-	-	-	-	-
gene10222	2577	1.44	3.22	0.39	0.11	0.14	0.15	-3.17643	9.50557e-05	0.000900267	ccnf	XP_010737722.2	cyclin-F isoform X1 [Larimichthys crocea]	GO:0042626;GO:0051301;GO:0016021;GO:0005737;GO:0005634;GO:0005814	ATPase-coupled transmembrane transporter activity;cell division;integral component of membrane;cytoplasm;nucleus;centriole	K10289	CCNF,FBXO1	http://www.genome.jp/dbget-bin/www_bget?ko:K10289	-	-	-	-	sp|Q6NYX6|CCNF_DANRE	Cyclin-F OS=Danio rerio OX=7955 GN=ccnf PE=2 SV=1
gene11138	2829	5.73	8.36	3.73	0.47	0.35	0.64	-3.21238	3.7705e-13	3.22094e-11	LOC104926664	XP_010738875.1	sphingosine 1-phosphate receptor 1 [Larimichthys crocea]	GO:0016021;GO:0005886;GO:0038036	integral component of membrane;plasma membrane;sphingosine-1-phosphate receptor activity	K04295	S1PR5,EDG8	http://www.genome.jp/dbget-bin/www_bget?ko:K04295	Sphingolipid signaling pathway;Neuroactive ligand-receptor interaction	ko04071,ko04080	-	-	sp|P48303|S1PR1_RAT	Sphingosine 1-phosphate receptor 1 OS=Rattus norvegicus OX=10116 GN=S1pr1 PE=1 SV=1
gene2013	4689	28.44	23.07	28.86	6.73	8.11	13.83	-1.11224	0.00139897	0.00854561	nktr	XP_027129909.1;XP_027129907.1;XP_027129906.1;XP_027129908.1	NK-tumor recognition protein isoform X4 [Larimichthys crocea];NK-tumor recognition protein isoform X2 [Larimichthys crocea];NK-tumor recognition protein isoform X1 [Larimichthys crocea];NK-tumor recognition protein isoform X3 [Larimichthys crocea]	GO:0003755;GO:0006457	peptidyl-prolyl cis-trans isomerase activity;protein folding	K12740	NKTR	http://www.genome.jp/dbget-bin/www_bget?ko:K12740	-	-	KOG0546;KOG0865	HSP90 co-chaperone CPR7/Cyclophilin;Cyclophilin type peptidyl-prolyl cis-trans isomerase	sp|P30414|NKTR_HUMAN	NK-tumor recognition protein OS=Homo sapiens OX=9606 GN=NKTR PE=1 SV=2
novel.21104	1354	6.19	8.66	3.6	0.14	0.15	0.67	-4.10481	5.43672e-12	3.59251e-10	-	XP_027133721.1	immunoglobulin lambda-1 light chain, partial [Larimichthys crocea]	GO:0016021	integral component of membrane	K06554	IGLL1,IGLL,CD179b	http://www.genome.jp/dbget-bin/www_bget?ko:K06554	Primary immunodeficiency	ko05340	-	-	-	-
gene15216	4003	0.33	0.33	0.43	0.04	0.04	0.08	-2.42923	0.00254425	0.0140018	myo3b	XP_027146586.1	myosin-IIIb isoform X1 [Larimichthys crocea]	GO:0004672;GO:0005524;GO:0007601;GO:0003774;GO:0050896;GO:0003779;GO:0016459	protein kinase activity;ATP binding;visual perception;cytoskeletal motor activity;response to stimulus;actin binding;myosin complex	K08834	MYO3,DFNB30	http://www.genome.jp/dbget-bin/www_bget?ko:K08834	Phototransduction - fly	ko04745	KOG4229	Myosin VII, myosin IXB and related myosins	sp|Q8WXR4|MYO3B_HUMAN	Myosin-IIIb OS=Homo sapiens OX=9606 GN=MYO3B PE=2 SV=4
novel.21548	1589	2.93	5.03	1.82	0.31	0.48	1.55	-1.79367	0.00361972	0.0186449	-	XP_010754701.3	LOW QUALITY PROTEIN: zinc-binding protein A33 [Larimichthys crocea]	-	-	K12012	TRIM35	http://www.genome.jp/dbget-bin/www_bget?ko:K12012	-	-	-	-	sp|Q91431|NF7O_XENLA	Nuclear factor 7, ovary OS=Xenopus laevis OX=8355 PE=2 SV=1
gene11499	4487	2.34	1.91	1.74	0.61	0.09	0.45	-2.0237	0.000592913	0.0041733	csf1r	XP_010739350.1;XP_010739351.1	macrophage colony-stimulating factor 1 receptor 1 isoform X1 [Larimichthys crocea];macrophage colony-stimulating factor 1 receptor 1 isoform X2 [Larimichthys crocea]	GO:0004714;GO:0007275;GO:0006954;GO:0019221;GO:0005886;GO:0016021;GO:0005524;GO:0019955;GO:0007169	transmembrane receptor protein tyrosine kinase activity;multicellular organism development;inflammatory response;cytokine-mediated signaling pathway;plasma membrane;integral component of membrane;ATP binding;cytokine binding;transmembrane receptor protein tyrosine kinase signaling pathway	K05090	CSF1R,FMS,CD115	http://www.genome.jp/dbget-bin/www_bget?ko:K05090	MAPK signaling pathway;PI3K-Akt signaling pathway;Rap1 signaling pathway;Ras signaling pathway;Cytokine-cytokine receptor interaction;Viral protein interaction with cytokine and cytokine receptor;Pathways in cancer;Transcriptional misregulation in cancer;Acute myeloid leukemia;Osteoclast differentiation;Hematopoietic cell lineage	ko04010,ko04151,ko04015,ko04014,ko04060,ko04061,ko05200,ko05202,ko05221,ko04380,ko04640	-	-	sp|P79750|CSF11_TAKRU	Macrophage colony-stimulating factor 1 receptor 1 OS=Takifugu rubripes OX=31033 GN=csf1r1 PE=3 SV=1
gene3661	2169	4.47	5.39	3.3	0.38	0.53	1.56	-2.14506	8.87806e-06	0.000120198	LOC104918601	KAE8283290.1;XP_027140525.1	Zinc-binding protein A33 [Larimichthys crocea];zinc-binding protein A33 isoform X1 [Larimichthys crocea]	GO:0008270	zinc ion binding	-	-	-	-	-	-	-	sp|Q02084|A33_PLEWA	Zinc-binding protein A33 OS=Pleurodeles waltl OX=8319 PE=1 SV=2
gene2649	1289	0.47	1.48	0.34	0	0	0	-5.83755	0.000542297	0.00387255	LOC104940589	TMS17972.1	Acetylcholinesterase collagenic tail peptide [Larimichthys crocea]	-	-	-	-	-	-	-	-	-	sp|Q03637|COLQ_TORMA	Acetylcholinesterase collagenic tail peptide OS=Torpedo marmorata OX=7788 PE=1 SV=1
gene16030	2638	2.71	5.87	3.33	0.46	0.8	0.17	-2.37798	0.000930713	0.00608747	LOC104931913	XP_019116953.1	spondin-1 [Larimichthys crocea]	GO:0046872;GO:0005576;GO:0007155	metal ion binding;extracellular region;cell adhesion	K24427	SPON1	http://www.genome.jp/dbget-bin/www_bget?ko:K24427	-	-	-	-	sp|Q9HCB6|SPON1_HUMAN	Spondin-1 OS=Homo sapiens OX=9606 GN=SPON1 PE=1 SV=2
gene2061	1913	6.63	17.6	9.91	1.17	1.31	1.98	-2.59584	6.934e-08	1.76564e-06	etnppl	KAE8279031.1	Ethanolamine-phosphate phospho-lyase [Larimichthys crocea]	GO:0030170;GO:0008483;GO:0016829	pyridoxal phosphate binding;transaminase activity;lyase activity	K14286	AGXT2L1,ETNPPL	http://www.genome.jp/dbget-bin/www_bget?ko:K14286	Glycerophospholipid metabolism	ko00564	KOG1404	Alanine-glyoxylate aminotransferase AGT2	sp|Q7SY54|AT2L1_DANRE	Ethanolamine-phosphate phospho-lyase OS=Danio rerio OX=7955 GN=etnppl PE=2 SV=1
gene18324	1894	12.28	25.28	7.95	2.09	2.23	4.14	-1.93053	0.000216451	0.00178998	LOC104934364	XP_019111803.2;KAE8295569.1	TRPM8 channel-associated factor homolog [Larimichthys crocea];TRPM8 channel-associated factor-like protein [Larimichthys crocea]	-	-	-	-	-	-	-	-	-	sp|A4IG42|TCAF_DANRE	TRPM8 channel-associated factor homolog OS=Danio rerio OX=7955 GN=tcaf PE=2 SV=1
gene10588	1435	0.66	5.28	0.83	0.09	0.18	0.14	-3.51307	0.000478898	0.00348873	LOC104926088	KAE8282335.1	Keratinocyte differentiation factor 1 [Larimichthys crocea]	GO:0003334	keratinocyte development	K23346	KDF1	http://www.genome.jp/dbget-bin/www_bget?ko:K23346	-	-	-	-	sp|A2A9F4|KDF1_MOUSE	Keratinocyte differentiation factor 1 OS=Mus musculus OX=10090 GN=Kdf1 PE=1 SV=1
gene6637	3352	5.81	5.87	4.05	1.18	1.58	3.37	-1.0302	0.00712708	0.0321584	rfx2	KAE8293968.1;XP_018551472.1;XP_019132938.1;XP_010732783.1	DNA-binding protein RFX2 Regulatory factor X 2 [Larimichthys crocea];PREDICTED: DNA-binding protein RFX2 isoform X2 [Lates calcarifer];DNA-binding protein RFX2 isoform X2 [Larimichthys crocea];DNA-binding protein RFX2 isoform X3 [Larimichthys crocea]	GO:0003677;GO:0005634;GO:0003700	DNA binding;nucleus;DNA-binding transcription factor activity	K09173	RFX1_2_3	http://www.genome.jp/dbget-bin/www_bget?ko:K09173	-	-	KOG3712	RFX family transcription factor	sp|Q5EAP5|RFX2_DANRE	DNA-binding protein RFX2 OS=Danio rerio OX=7955 GN=rfx2 PE=2 SV=1
gene3293	2348	5.17	13.3	3.53	1.17	0.63	1.81	-2.24307	3.00395e-05	0.000340459	sptlc3	XP_010728188.2	serine palmitoyltransferase 3 [Larimichthys crocea]	GO:0030170;GO:0016021;GO:0009058;GO:0016740	pyridoxal phosphate binding;integral component of membrane;biosynthetic process;transferase activity	K00654	SPT	http://www.genome.jp/dbget-bin/www_bget?ko:K00654	Sphingolipid signaling pathway;Sphingolipid metabolism	ko04071,ko00600	KOG1357	Serine palmitoyltransferase	sp|Q9NUV7|SPTC3_HUMAN	Serine palmitoyltransferase 3 OS=Homo sapiens OX=9606 GN=SPTLC3 PE=1 SV=3
novel.9097	1003	4.88	3.39	3.86	0.11	0.36	0.61	-3.16918	1.13729e-05	0.000148616	-	TMS14077.1	hypothetical protein E3U43_022557 [Larimichthys crocea]	-	-	-	-	-	-	-	-	-	-	-
gene23828	418	125.57	134.86	49.35	25.94	16.63	46.78	-1.40272	0.00169118	0.0099978	LOC104940169	KAE8282019.1	hypothetical protein D5F01_LYC19409 [Larimichthys crocea]	-	-	-	-	-	-	-	-	-	sp|Q9BQQ7|RTP3_HUMAN	Receptor-transporting protein 3 OS=Homo sapiens OX=9606 GN=RTP3 PE=1 SV=1
gene18963	1521	5.85	17.8	4.59	1.03	1.3	2.42	-2.17017	0.000159819	0.00138799	rnf225	XP_010749123.1	RING finger protein 225 [Larimichthys crocea]	GO:0046872;GO:0016021	metal ion binding;integral component of membrane	-	-	-	-	-	-	-	sp|Q3UV31|RN223_MOUSE	RING finger protein 223 OS=Mus musculus OX=10090 GN=Rnf223 PE=2 SV=2
novel.18901	527	7.3	0.85	1.62	0.2	0.21	0	-3.98583	0.0092967	0.0397815	-	XP_034539447.1	uncharacterized protein LOC117812652 [Notolabrus celidotus]	-	-	-	-	-	-	-	-	-	-	-
gene21867	1116	27.03	43.18	3.41	0.84	0.07	0.97	-5.02007	1.99838e-09	7.5018e-08	LOC104938108	KAE8288345.1	hypothetical protein D5F01_LYC12213 [Larimichthys crocea]	-	-	-	-	-	-	-	-	-	-	-
gene9063	2614	1.7	16.82	3	0.11	0.13	0.24	-5.14599	3.20017e-10	1.46017e-08	LOC104924464	XP_035848956.1	uncharacterized protein LOC116037654 [Sander lucioperca]	-	-	K06751	MHC1	http://www.genome.jp/dbget-bin/www_bget?ko:K06751	Cellular senescence;Endocytosis;Phagosome;Cell adhesion molecules;Viral carcinogenesis;Viral myocarditis;Type I diabetes mellitus;Allograft rejection;Autoimmune thyroid disease;Graft-versus-host disease;Epstein-Barr virus infection;Herpes simplex virus 1 infection;Human T-cell leukemia virus 1 infection;Human cytomegalovirus infection;Human immunodeficiency virus 1 infection;Human papillomavirus …	ko04218,ko04144,ko04145,ko04514,ko05203,ko05416,ko04940,ko05330,ko05320,ko05332,ko05169,ko05168,ko05166,ko05163,ko05170,ko05165,ko05167,ko04612,ko04650	-	-	sp|Q5RD09|HMR1_PONAB	Major histocompatibility complex class I-related gene protein OS=Pongo abelii OX=9601 GN=MR1 PE=2 SV=1
gene14192	2947	3.16	4.45	2.77	0.94	0.54	1.99	-1.32838	0.00202803	0.0116365	LOC104929936	KAE8287519.1	Rho GTPase-activating protein 42 [Larimichthys crocea]	GO:0007165;GO:0005096;GO:0043547	signal transduction;GTPase activator activity;positive regulation of GTPase activity	K20651	ARHGAP42,GRAF3	http://www.genome.jp/dbget-bin/www_bget?ko:K20651	-	-	KOG1451	Oligophrenin-1 and related Rho GTPase-activating proteins	sp|B2RQE8|RHG42_MOUSE;sp|A6NI28|RHG42_HUMAN	Rho GTPase-activating protein 42 OS=Mus musculus OX=10090 GN=Arhgap42 PE=1 SV=1;Rho GTPase-activating protein 42 OS=Homo sapiens OX=9606 GN=ARHGAP42 PE=1 SV=3
gene4697	2223	34.73	50	20.26	5.28	3.55	11.48	-2.11075	1.23952e-07	2.93037e-06	LOC104919722	XP_019132004.1;TMS13904.1	myelin protein zero-like protein 2 isoform X1 [Larimichthys crocea];Myelin protein zero-like protein 2 [Larimichthys crocea]	GO:0098609;GO:0005886;GO:0016021	cell-cell adhesion;plasma membrane;integral component of membrane	-	-	-	-	-	-	-	sp|O60487|MPZL2_HUMAN	Myelin protein zero-like protein 2 OS=Homo sapiens OX=9606 GN=MPZL2 PE=1 SV=1
gene7064	3723	5.88	6.69	4.69	0.74	0.47	1.4	-2.41325	1.21573e-11	7.62555e-10	cbfa2t2	XP_027135302.1	protein CBFA2T2 isoform X1 [Larimichthys crocea]	GO:0046872;GO:0003714;GO:0006351;GO:0005634	metal ion binding;transcription corepressor activity;transcription, DNA-templated;nucleus	K22751	CBFA2T2	http://www.genome.jp/dbget-bin/www_bget?ko:K22751	-	-	-	-	sp|O43439|MTG8R_HUMAN	Protein CBFA2T2 OS=Homo sapiens OX=9606 GN=CBFA2T2 PE=1 SV=1
gene1134	4500	1.28	1.95	1.59	0.11	0.19	0.36	-2.54524	4.52099e-07	9.2191e-06	samd11	XP_010739308.2	sterile alpha motif domain-containing protein 11 isoform X1 [Larimichthys crocea]	GO:0003677	DNA binding	-	-	-	-	-	-	-	sp|Q96NU1|SAM11_HUMAN	Sterile alpha motif domain-containing protein 11 OS=Homo sapiens OX=9606 GN=SAMD11 PE=1 SV=3
novel.21807	523	0.48	2.37	2.75	0	0	0	-5.18157	0.00620946	0.0288208	-	-	-	-	-	-	-	-	-	-	-	-	-	-
gene11686	2807	8.87	5.07	6.3	0.22	0.17	0.69	-4.0672	1.33429e-15	1.94462e-13	lef1	XP_019110891.1	lymphoid enhancer-binding factor 1 isoform X3 [Larimichthys crocea]	GO:0006357;GO:0016055;GO:0008013	regulation of transcription by RNA polymerase II;Wnt signaling pathway;beta-catenin binding	K04492	LEF1	http://www.genome.jp/dbget-bin/www_bget?ko:K04492	Adherens junction;Hippo signaling pathway;Wnt signaling pathway;Pathways in cancer;Acute myeloid leukemia;Basal cell carcinoma;Breast cancer;Colorectal cancer;Endometrial cancer;Gastric cancer;Hepatocellular carcinoma;Prostate cancer;Thyroid cancer;Arrhythmogenic right ventricular cardiomyopathy;Alcoholic liver disease;Cushing syndrome;Salmonella infection;Kaposi sarcoma-associated herpesvirus in…	ko04520,ko04390,ko04310,ko05200,ko05221,ko05217,ko05224,ko05210,ko05213,ko05226,ko05225,ko05215,ko05216,ko05412,ko04936,ko04934,ko05132,ko05167,ko04916	KOG3248	Transcription factor TCF-4	sp|Q9UJU2|LEF1_HUMAN	Lymphoid enhancer-binding factor 1 OS=Homo sapiens OX=9606 GN=LEF1 PE=1 SV=1
gene1787	4010	8.15	9.57	4.64	2.45	1.42	4.35	-1.1195	0.00303476	0.0161246	ophn1	XP_010748258.1	oligophrenin-1 [Larimichthys crocea]	GO:0043547;GO:0007165;GO:0005096	positive regulation of GTPase activity;signal transduction;GTPase activator activity	K20650	OPHN1,ARHGAP41	http://www.genome.jp/dbget-bin/www_bget?ko:K20650	-	-	KOG1451	Oligophrenin-1 and related Rho GTPase-activating proteins	sp|Q7YQL6|OPHN1_PANTR	Oligophrenin-1 OS=Pan troglodytes OX=9598 GN=OPHN1 PE=2 SV=1
novel.21718	766	4.18	7.55	1.9	0	0.41	0	-4.35339	0.000179787	0.00153283	-	XP_027145293.1	putative ferric-chelate reductase 1 [Larimichthys crocea]	GO:0000166;GO:0006260;GO:0003887;GO:0003677	nucleotide binding;DNA replication;DNA-directed DNA polymerase activity;DNA binding	-	-	-	-	-	-	-	-	-
gene20791	3502	15.38	12.43	12.2	3.82	1.38	5.19	-1.8328	1.64306e-07	3.79388e-06	LOC104936959	XP_027143750.1;KAE8279182.1;XP_027143668.1	poly [ADP-ribose] polymerase 14 isoform X3 [Larimichthys crocea];Poly [ADP-ribose] polymerase 14 [Larimichthys crocea];poly [ADP-ribose] polymerase 14 isoform X1 [Larimichthys crocea]	GO:0003950	NAD+ ADP-ribosyltransferase activity	-	-	-	-	-	-	-	sp|Q460N3|PAR15_HUMAN;sp|Q2EMV9|PAR14_MOUSE	Protein mono-ADP-ribosyltransferase PARP15 OS=Homo sapiens OX=9606 GN=PARP15 PE=1 SV=2;Protein mono-ADP-ribosyltransferase PARP14 OS=Mus musculus OX=10090 GN=Parp14 PE=1 SV=3
gene14494	4811	2.25	2.19	1.87	0.72	0.43	1.38	-1.02469	0.0063883	0.0295017	LOC104930257	KAE8300878.1	Centriolar coiled-coil protein of 110 kDa [Larimichthys crocea]	GO:0005814;GO:0007099;GO:0032465	centriole;centriole replication;regulation of cytokinesis	K16453	CCP110,CEP110	http://www.genome.jp/dbget-bin/www_bget?ko:K16453	-	-	-	-	sp|O43303|CP110_HUMAN	Centriolar coiled-coil protein of 110 kDa OS=Homo sapiens OX=9606 GN=CCP110 PE=1 SV=3
gene18075	2093	3.65	12.62	6.19	0.2	0.17	0.09	-5.07436	1.35151e-13	1.25884e-11	tp73	XP_019112267.1;XP_010747964.1	tumor protein p73 isoform X1 [Larimichthys crocea];tumor protein p73 isoform X2 [Larimichthys crocea]	GO:0003700;GO:0005737;GO:0006915;GO:0051262;GO:0005634;GO:0007050;GO:0000976;GO:0046872	DNA-binding transcription factor activity;cytoplasm;apoptotic process;protein tetramerization;nucleus;regulation of cell cycle;transcription cis-regulatory region binding;metal ion binding	K10148	TP73	http://www.genome.jp/dbget-bin/www_bget?ko:K10148	p53 signaling pathway;Hippo signaling pathway;Measles;Neurotrophin signaling pathway	ko04115,ko04390,ko05162,ko04722	-	-	sp|Q9JJP2|P73_MOUSE	Tumor protein p73 OS=Mus musculus OX=10090 GN=Tp73 PE=1 SV=1
gene272	5081	3.43	5.01	1.96	1.29	0.83	1.74	-1.03721	0.012173	0.0492565	adcy7	KAE8297352.1;XP_010755605.2	Adenylate cyclase type 2 [Larimichthys crocea];adenylate cyclase type 7 isoform X1 [Larimichthys crocea]	GO:0005886;GO:0035556;GO:0016021;GO:0006171;GO:0005524;GO:0046872;GO:0004016	plasma membrane;intracellular signal transduction;integral component of membrane;cAMP biosynthetic process;ATP binding;metal ion binding;adenylate cyclase activity	K08047	ADCY7	http://www.genome.jp/dbget-bin/www_bget?ko:K08047	Oocyte meiosis;Gap junction;Apelin signaling pathway;Calcium signaling pathway;Phospholipase D signaling pathway;Rap1 signaling pathway;cAMP signaling pathway;cGMP-PKG signaling pathway;Chemical carcinogenesis - receptor activation;Pathways in cancer;Dilated cardiomyopathy;Endocrine resistance;Cushing syndrome;Human T-cell leukemia virus 1 infection;Human cytomegalovirus infection;Morphine addict…	ko04114,ko04540,ko04371,ko04020,ko04072,ko04015,ko04024,ko04022,ko05207,ko05200,ko05414,ko01522,ko04934,ko05166,ko05163,ko05032,ko00230,ko04211,ko04213,ko04261,ko04270,ko04976,ko04971,ko04972,ko04970,ko04925,ko04927,ko04915,ko04912,ko04935,ko04911,ko04916,ko04913,ko04921,ko04928,ko04914,ko04923,ko04926,ko04918,ko04713,ko04714,ko04062,ko04611,ko04725,ko04727,ko04724,ko04723,ko04750	KOG3619	Adenylate/guanylate cyclase	sp|Q80TL1|ADCY2_MOUSE	Adenylate cyclase type 2 OS=Mus musculus OX=10090 GN=Adcy2 PE=1 SV=2
gene9334	4167	19.51	21.84	9.92	3.46	2.3	7.8	-1.62152	3.53204e-05	0.000390669	smc4	XP_019134977.2;XP_010736494.3	structural maintenance of chromosomes protein 4 isoform X2 [Larimichthys crocea];structural maintenance of chromosomes protein 4 isoform X1 [Larimichthys crocea]	GO:0051276;GO:0005524;GO:0005634;GO:0007049;GO:0016887;GO:0005694	chromosome organization;ATP binding;nucleus;cell cycle;ATP hydrolysis activity;chromosome	K06675	SMC4	http://www.genome.jp/dbget-bin/www_bget?ko:K06675	-	-	KOG0996	Structural maintenance of chromosome protein 4 (chromosome condensation complex Condensin, subunit C)	sp|P50532|SMC4_XENLA	Structural maintenance of chromosomes protein 4 OS=Xenopus laevis OX=8355 GN=smc4 PE=1 SV=1
gene17739	1041	3.04	6.97	2.56	0.5	0.14	0.07	-3.47199	0.000486789	0.00353893	LOC104933718	XP_019111401.2	GTPase IMAP family member 7-like [Larimichthys crocea]	GO:0016021;GO:0005525	integral component of membrane;GTP binding	-	-	-	-	-	-	-	sp|Q8NHV1|GIMA7_HUMAN	GTPase IMAP family member 7 OS=Homo sapiens OX=9606 GN=GIMAP7 PE=1 SV=1
novel.19532	563	3.3	6.68	0.95	0	0	0	-6.26652	0.000116081	0.00106087	-	-	-	-	-	-	-	-	-	-	-	-	-	-
gene18466	3409	9.91	15.73	5.09	2.15	1.47	5.52	-1.46741	0.0016652	0.009863	rab3d	XP_010748489.1	ras-related protein Rab-3D [Larimichthys crocea]	GO:0003924;GO:0005886;GO:0005525;GO:0006886	GTPase activity;plasma membrane;GTP binding;intracellular protein transport	K07884	RAB3D	http://www.genome.jp/dbget-bin/www_bget?ko:K07884	Pancreatic secretion	ko04972	KOG0093	GTPase Rab3, small G protein superfamily	sp|O95716|RAB3D_HUMAN	Ras-related protein Rab-3D OS=Homo sapiens OX=9606 GN=RAB3D PE=1 SV=1
gene16666	473	17.69	26.11	26.04	0.75	1.31	2.74	-3.52756	1.33914e-08	4.12155e-07	LOC104932601	QIH54606.1	C-C motif chemokine 2 [Larimichthys crocea]	GO:0008009;GO:0006955;GO:0005615	chemokine activity;immune response;extracellular space	K14624	CCL2,MCP1	http://www.genome.jp/dbget-bin/www_bget?ko:K14624	TNF signaling pathway;Cytokine-cytokine receptor interaction;Viral protein interaction with cytokine and cytokine receptor;Fluid shear stress and atherosclerosis;Lipid and atherosclerosis;AGE-RAGE signaling pathway in diabetic complications;Rheumatoid arthritis;Yersinia infection;Chagas disease;Malaria;Coronavirus disease - COVID-19;Herpes simplex virus 1 infection;Human cytomegalovirus infection…	ko04668,ko04060,ko04061,ko05418,ko05417,ko04933,ko05323,ko05135,ko05142,ko05144,ko05171,ko05168,ko05163,ko05164,ko04062,ko04657,ko04621	-	-	sp|P28291|CCL2_BOVIN	C-C motif chemokine 2 OS=Bos taurus OX=9913 GN=CCL2 PE=3 SV=1
gene17863	2983	11.95	10.07	6.56	1.39	2.79	3.72	-1.42193	0.00184035	0.0107564	LOC104933851	TMS01294.1;XP_019129702.1	NLR family CARD domain-containing protein 3 [Larimichthys crocea];NLR family CARD domain-containing protein 3-like [Larimichthys crocea]	-	-	K22614	NLRC3,NOD3	http://www.genome.jp/dbget-bin/www_bget?ko:K22614	-	-	-	-	sp|Q7RTR2|NLRC3_HUMAN	NLR family CARD domain-containing protein 3 OS=Homo sapiens OX=9606 GN=NLRC3 PE=1 SV=2
gene11760	2497	8.09	10.73	4.55	0.64	0.72	2.14	-2.43978	2.23897e-07	4.98855e-06	cblc	XP_027142817.1;XP_027142818.1	E3 ubiquitin-protein ligase CBL-C isoform X2 [Larimichthys crocea];E3 ubiquitin-protein ligase CBL-C isoform X3 [Larimichthys crocea]	GO:0023051;GO:0005509;GO:0007166;GO:0001784;GO:0005737;GO:0004842;GO:0047690	regulation of signaling;calcium ion binding;cell surface receptor signaling pathway;phosphotyrosine residue binding;cytoplasm;ubiquitin-protein transferase activity;aspartyltransferase activity	K22518	CBLC	http://www.genome.jp/dbget-bin/www_bget?ko:K22518	Endocytosis;Ubiquitin mediated proteolysis	ko04144,ko04120	-	-	sp|P22682|CBL_MOUSE	E3 ubiquitin-protein ligase CBL OS=Mus musculus OX=10090 GN=Cbl PE=1 SV=3
gene6127	3043	3.49	6.12	3.29	1.64	1.02	2.08	-1.05144	0.00916424	0.0393098	rgs18	XP_010732047.2	regulator of G-protein signaling 21 [Larimichthys crocea]	GO:0005096;GO:0048884;GO:0048840;GO:0002574;GO:0009948;GO:0071599;GO:0043547;GO:0007186	GTPase activator activity;neuromast development;otolith development;thrombocyte differentiation;anterior/posterior axis specification;otic vesicle development;positive regulation of GTPase activity;G protein-coupled receptor signaling pathway	K16449	RGS	http://www.genome.jp/dbget-bin/www_bget?ko:K16449	-	-	-	-	sp|Q9NS28|RGS18_HUMAN	Regulator of G-protein signaling 18 OS=Homo sapiens OX=9606 GN=RGS18 PE=1 SV=1
gene12631	2731	27.72	27.49	10.71	3.3	1.22	5.24	-2.50356	1.11924e-07	2.69751e-06	LOC104928278	KAE8294463.1;TMS20341.1	Adapter protein CIKS Connection to IKK and SAPK/JNK Nuclear factor NF-kappa-B activator 1 [Larimichthys crocea];Adapter protein CIKS [Larimichthys crocea]	-	-	K21124	TRAF3IP2,ACT1	http://www.genome.jp/dbget-bin/www_bget?ko:K21124	Cellular senescence;IL-17 signaling pathway	ko04218,ko04657	-	-	sp|O43734|CIKS_HUMAN	E3 ubiquitin ligase TRAF3IP2 OS=Homo sapiens OX=9606 GN=TRAF3IP2 PE=1 SV=3
gene12086	464	3.14	6.2	3.59	0.26	0	0.57	-3.64743	0.00411694	0.0206983	LOC104927708	XP_010740152.3	phospholipase A2, minor isoenzyme [Larimichthys crocea]	GO:0102568;GO:0005509;GO:0006644;GO:0016042;GO:0004623;GO:0005576;GO:0102567;GO:0050482	phospholipase A2 activity;calcium ion binding;phospholipid metabolic process;lipid catabolic process;phospholipase A2 activity;extracellular region;phospholipase A2 activity;arachidonic acid secretion	K01047	PLA2G,SPLA2	http://www.genome.jp/dbget-bin/www_bget?ko:K01047	Ras signaling pathway;Arachidonic acid metabolism;Ether lipid metabolism;Glycerophospholipid metabolism;Linoleic acid metabolism;alpha-Linolenic acid metabolism;Vascular smooth muscle contraction;Fat digestion and absorption;Pancreatic secretion	ko04014,ko00590,ko00565,ko00564,ko00591,ko00592,ko04270,ko04975,ko04972	KOG4087	Phospholipase A2	sp|P00593|PA21B_BOVIN	Phospholipase A2 OS=Bos taurus OX=9913 GN=PLA2G1B PE=1 SV=2
novel.9332	1066	7.27	5.97	3.66	0.71	0.13	0.56	-3.19355	6.09648e-07	1.18934e-05	-	-	-	-	-	-	-	-	-	-	-	-	-	-
novel.16542	373	50.32	37.52	3.14	4.67	0	5.19	-2.89747	0.00647391	0.029797	-	TKS79251.1	repeat-containing protein WDC146 [Collichthys lucidus]	GO:0005634	nucleus	-	-	-	-	-	-	-	-	-
novel.13684	1024	20.82	13.68	6.98	2.46	0.21	5.05	-2.23013	0.00176507	0.0103801	-	XP_027132178.1	stonustoxin subunit beta [Larimichthys crocea]	GO:0090729;GO:0044179;GO:0005576	toxin activity;hemolysis in other organism;extracellular region	-	-	-	-	-	-	-	-	-
gene12490	2897	14.02	21.27	19.55	5.26	2.62	7.36	-1.37398	3.01004e-05	0.000340748	plekha1	KAF1373482.1;XP_019124587.1	hypothetical protein PFLUV_G00239320 [Perca fluviatilis];pleckstrin homology domain-containing family A member 1 isoform X1 [Larimichthys crocea]	-	-	K23796	PLEKHA1_2	http://www.genome.jp/dbget-bin/www_bget?ko:K23796	-	-	-	-	sp|Q9HB21|PKHA1_HUMAN;sp|Q8BUL6|PKHA1_MOUSE	Pleckstrin homology domain-containing family A member 1 OS=Homo sapiens OX=9606 GN=PLEKHA1 PE=1 SV=2;Pleckstrin homology domain-containing family A member 1 OS=Mus musculus OX=10090 GN=Plekha1 PE=1 SV=1
gene16526	1114	1.13	0.97	1.84	0	0	0	-6.56185	1.14818e-05	0.000149723	LOC104932448	XP_027130925.1	phospholipase B1, membrane-associated [Larimichthys crocea]	GO:0004620	phospholipase activity	K14621	PLB1,PLB	http://www.genome.jp/dbget-bin/www_bget?ko:K14621	Arachidonic acid metabolism;Ether lipid metabolism;Glycerophospholipid metabolism;Linoleic acid metabolism;alpha-Linolenic acid metabolism;Vitamin digestion and absorption	ko00590,ko00565,ko00564,ko00591,ko00592,ko04977	KOG3670	Phospholipase	sp|Q3TTY0|PLB1_MOUSE	Phospholipase B1, membrane-associated OS=Mus musculus OX=10090 GN=Plb1 PE=1 SV=2
gene968	4216	11.55	17.6	5.87	4.02	2.12	5.98	-1.14903	0.00870814	0.0377256	LOC104924986	XP_010736809.3	PH and SEC7 domain-containing protein 4 [Larimichthys crocea]	GO:0005085;GO:0005543;GO:0032012;GO:0032587	guanyl-nucleotide exchange factor activity;phospholipid binding;regulation of ARF protein signal transduction;ruffle membrane	K12494	PSD	http://www.genome.jp/dbget-bin/www_bget?ko:K12494	Endocytosis;Axon regeneration	ko04144,ko04361	KOG0932	Guanine nucleotide exchange factor EFA6	sp|Q2PFD7|PSD3_MOUSE	PH and SEC7 domain-containing protein 3 OS=Mus musculus OX=10090 GN=Psd3 PE=1 SV=2
gene4835	525	2.39	3.24	0.68	0	0.07	0	-5.23154	0.00470287	0.0230364	LOC104919873	KAE8285693.1	Securin Pituitary tumor-transforming gene 1 protein [Larimichthys crocea]	GO:0005634;GO:0005737;GO:0051276	nucleus;cytoplasm;chromosome organization	K06635	PTTG	http://www.genome.jp/dbget-bin/www_bget?ko:K06635	Cell cycle;Oocyte meiosis;Human T-cell leukemia virus 1 infection	ko04110,ko04114,ko05166	-	-	sp|A2T767|PTTG1_PANTR	Securin OS=Pan troglodytes OX=9598 GN=PTTG1 PE=3 SV=1
gene14434	2244	11.29	14.68	8.29	1.62	2.44	3.81	-1.41315	0.000644907	0.00447318	sod3	NP_001290282.1	extracellular superoxide dismutase [Cu-Zn] [Larimichthys crocea]	GO:0004784;GO:0005507	superoxide dismutase activity;copper ion binding	K16627	SOD3	http://www.genome.jp/dbget-bin/www_bget?ko:K16627	-	-	KOG0441	Cu2+/Zn2+ superoxide dismutase SOD1	sp|P08294|SODE_HUMAN	Extracellular superoxide dismutase [Cu-Zn] OS=Homo sapiens OX=9606 GN=SOD3 PE=1 SV=2
gene4852	3316	3.82	5.14	3.8	0.45	0.74	1.12	-2.10857	2.75386e-07	5.99557e-06	LOC104919939	XP_019129451.1;XP_019129450.1	rap guanine nucleotide exchange factor 3 isoform X2 [Larimichthys crocea];rap guanine nucleotide exchange factor 3 isoform X1 [Larimichthys crocea]	GO:0007264;GO:0005085	small GTPase mediated signal transduction;guanyl-nucleotide exchange factor activity	K08014	RAPGEF3,EPAC1	http://www.genome.jp/dbget-bin/www_bget?ko:K08014	Phospholipase D signaling pathway;Rap1 signaling pathway;cAMP signaling pathway;Adrenergic signaling in cardiomyocytes;Leukocyte transendothelial migration;Long-term potentiation;Serotonergic synapse	ko04072,ko04015,ko04024,ko04261,ko04670,ko04720,ko04726	KOG2378	cAMP-regulated guanine nucleotide exchange factor	sp|O95398|RPGF3_HUMAN	Rap guanine nucleotide exchange factor 3 OS=Homo sapiens OX=9606 GN=RAPGEF3 PE=1 SV=6
gene13911	7763	4.67	8.06	4.79	0.3	0.34	0.44	-3.62493	2.25812e-20	7.26587e-18	LOC104929637	XP_027140936.1;XP_027140942.1;XP_027140940.1	receptor-type tyrosine-protein phosphatase S-like isoform X2 [Larimichthys crocea];receptor-type tyrosine-protein phosphatase S-like isoform X8 [Larimichthys crocea];receptor-type tyrosine-protein phosphatase S-like isoform X6 [Larimichthys crocea]	-	-	K06778	PTPRS	http://www.genome.jp/dbget-bin/www_bget?ko:K06778	-	-	-	-	sp|F1NWE3|PTPRS_CHICK	Receptor-type tyrosine-protein phosphatase S OS=Gallus gallus OX=9031 GN=PTPRS PE=1 SV=3
gene4120	2669	18.07	25.21	9.45	3.09	2.28	6.15	-1.91815	2.28588e-06	3.75812e-05	lnx1	XP_010729312.1;XP_010729311.1;XP_010729313.1;XP_010729314.1	E3 ubiquitin-protein ligase LNX isoform X2 [Larimichthys crocea];E3 ubiquitin-protein ligase LNX isoform X1 [Larimichthys crocea];E3 ubiquitin-protein ligase LNX isoform X3 [Larimichthys crocea];E3 ubiquitin-protein ligase LNX isoform X4 [Larimichthys crocea]	GO:0046872	metal ion binding	K10692	LNX1_2	http://www.genome.jp/dbget-bin/www_bget?ko:K10692	-	-	-	-	sp|Q8TBB1|LNX1_HUMAN	E3 ubiquitin-protein ligase LNX OS=Homo sapiens OX=9606 GN=LNX1 PE=1 SV=1
gene20942	2690	1.2	0.82	1.23	0.11	0.24	0.51	-1.63499	0.0105811	0.0441341	LOC104937129	XP_027129617.1	forkhead box protein O1-A [Larimichthys crocea]	GO:0005634;GO:0003700;GO:0043565	nucleus;DNA-binding transcription factor activity;sequence-specific DNA binding	K07201	FOXO1	http://www.genome.jp/dbget-bin/www_bget?ko:K07201	Cellular senescence;AMPK signaling pathway;FoxO signaling pathway;Pathways in cancer;Transcriptional misregulation in cancer;Prostate cancer;AGE-RAGE signaling pathway in diabetic complications;Alcoholic liver disease;Insulin resistance;Shigellosis;Human papillomavirus infection;Longevity regulating pathway;Longevity regulating pathway - multiple species;Glucagon signaling pathway;Insulin signali…	ko04218,ko04152,ko04068,ko05200,ko05202,ko05215,ko04933,ko04936,ko04931,ko05131,ko05165,ko04211,ko04213,ko04922,ko04910,ko04919	-	-	sp|A3RK74|FX1AA_DANRE	Forkhead box protein O1-A OS=Danio rerio OX=7955 GN=foxo1a PE=2 SV=1
gene5097	4496	0.22	0.53	0.11	0	0.01	0.05	-3.49081	0.00274207	0.0148465	dll1	XP_010730645.1	delta-like protein 1 [Larimichthys crocea]	GO:0007275;GO:0016021;GO:0007219;GO:0005509	multicellular organism development;integral component of membrane;Notch signaling pathway;calcium ion binding	K06051	DLL	http://www.genome.jp/dbget-bin/www_bget?ko:K06051	Notch signaling pathway;Chemical carcinogenesis - receptor activation;Pathways in cancer;Breast cancer;Endocrine resistance;Th1 and Th2 cell differentiation	ko04330,ko05207,ko05200,ko05224,ko01522,ko04658	KOG1217	Fibrillins and related proteins containing Ca2+-binding EGF-like domains	sp|Q8UWJ4|DLLD_DANRE	Delta-like protein D OS=Danio rerio OX=7955 GN=dld PE=1 SV=2
gene22274	3668	24.45	31.61	14.79	6.44	3.42	14.47	-1.21527	0.0031872	0.0167728	LOC104938535	XP_033504987.1;TMS12310.1	arf-GAP with SH3 domain, ANK repeat and PH domain-containing protein 2b isoform X1 [Epinephelus lanceolatus];Arf-GAP with SH3 domain, ANK repeat and PH domain-containing protein 2 [Larimichthys crocea]	GO:0043547;GO:0046872;GO:0005737;GO:0005096	positive regulation of GTPase activity;metal ion binding;cytoplasm;GTPase activator activity	K12488	ASAP	http://www.genome.jp/dbget-bin/www_bget?ko:K12488	Endocytosis;Fc gamma R-mediated phagocytosis	ko04144,ko04666	-	-	sp|O43150|ASAP2_HUMAN	Arf-GAP with SH3 domain, ANK repeat and PH domain-containing protein 2 OS=Homo sapiens OX=9606 GN=ASAP2 PE=1 SV=3
novel.12915	581	41.25	52.38	6.26	4.62	0.29	13.09	-2.31839	0.0108857	0.0451539	TRIM16	XP_027147073.1	tripartite motif-containing protein 16-like [Larimichthys crocea]	GO:0008270	zinc ion binding	K12006	TRIM16	http://www.genome.jp/dbget-bin/www_bget?ko:K12006	-	-	-	-	sp|O95361|TRI16_HUMAN	Tripartite motif-containing protein 16 OS=Homo sapiens OX=9606 GN=TRIM16 PE=1 SV=3
gene19453	6222	0.08	0.92	0.51	0.03	0	0.11	-3.2436	0.00176616	0.0103841	LOC104935576	XP_019133733.1	kinesin-like protein KIF21A isoform X4 [Larimichthys crocea]	GO:0007018;GO:1990939;GO:0008017;GO:0005856;GO:0005524	microtubule-based movement;microtubule motor activity;microtubule binding;cytoskeleton;ATP binding	K24185	KIF21	http://www.genome.jp/dbget-bin/www_bget?ko:K24185	-	-	KOG0244	Kinesin-like protein	sp|Q7Z4S6|KI21A_HUMAN	Kinesin-like protein KIF21A OS=Homo sapiens OX=9606 GN=KIF21A PE=1 SV=2
novel.18482	358	46.71	31.84	14.29	4.32	1.37	7.69	-2.50939	0.000552416	0.00393634	-	KAE8283748.1	hypothetical protein D5F01_LYC17067 [Larimichthys crocea]	GO:0005634	nucleus	-	-	-	-	-	-	-	-	-
gene13214	1863	25.3	39.38	13.73	3.61	2.11	11.82	-1.94755	0.000125256	0.00113259	tmem179b	XP_010741578.2	transmembrane protein 179B [Larimichthys crocea]	GO:0016021	integral component of membrane	-	-	-	-	-	-	-	sp|Q7T392|T179B_DANRE	Transmembrane protein 179B OS=Danio rerio OX=7955 GN=tmem179b PE=2 SV=2
gene18807	1909	4.53	3.81	1.94	1.29	0.35	0.92	-1.57957	0.00579497	0.0271719	spdl1	XP_010748938.2	protein Spindly [Larimichthys crocea]	GO:0043515;GO:0000940;GO:0034501;GO:0007094;GO:0051301	kinetochore binding;outer kinetochore;protein localization to kinetochore;mitotic spindle assembly checkpoint signaling;cell division	-	-	-	-	-	-	-	sp|Q6NRW2|SPDLB_XENLA	Protein Spindly-B OS=Xenopus laevis OX=8355 GN=spdl1-b PE=2 SV=1
novel.18530	272	10.84	33.33	11.99	0	0	0	-4.97749	0.00877041	0.0379291	-	-	-	-	-	-	-	-	-	-	-	-	-	-
gene12046	2598	4.29	4.63	3.06	1.36	0.97	1.85	-1.12747	0.002251	0.0126665	p2ry1	KAE8295215.1	P2Y purinoceptor 1 [Larimichthys crocea]	GO:0045028;GO:0005524;GO:0016021;GO:0030168;GO:0005886;GO:0090075;GO:0007200	G protein-coupled purinergic nucleotide receptor activity;ATP binding;integral component of membrane;platelet activation;plasma membrane;relaxation of muscle;phospholipase C-activating G protein-coupled receptor signaling pathway	K04270	P2RY1	http://www.genome.jp/dbget-bin/www_bget?ko:K04270	Rap1 signaling pathway;Neuroactive ligand-receptor interaction;Platelet activation;Taste transduction	ko04015,ko04080,ko04611,ko04742	-	-	sp|P34996|P2RY1_CHICK	P2Y purinoceptor 1 OS=Gallus gallus OX=9031 GN=P2RY1 PE=2 SV=1
novel.3038	1359	11.09	11.3	6.98	2.14	1.74	4.69	-1.44766	0.000184759	0.00156499	Trim25	XP_019115276.2	E3 ubiquitin-protein ligase TRIM21 isoform X2 [Larimichthys crocea]	GO:0016874;GO:0008270	ligase activity;zinc ion binding	-	-	-	-	-	-	-	sp|Q61510|TRI25_MOUSE	E3 ubiquitin/ISG15 ligase TRIM25 OS=Mus musculus OX=10090 GN=Trim25 PE=1 SV=2
gene5739	1845	21.29	33.57	13.98	4.93	3.8	12.85	-1.3859	0.00095001	0.00618755	LOC104920870	XP_010731555.2	tapasin-related protein [Larimichthys crocea]	GO:0016021;GO:0005886	integral component of membrane;plasma membrane	-	-	-	-	-	-	-	sp|Q9BX59|TPSNR_HUMAN	Tapasin-related protein OS=Homo sapiens OX=9606 GN=TAPBPL PE=1 SV=2
novel.18924	400	16.07	32.06	6.41	0	0	0	-7.40536	3.12422e-07	6.67291e-06	-	-	-	-	-	-	-	-	-	-	-	-	-	-
gene7506	1919	1.08	2.19	1.13	0.09	0.06	0.07	-3.84498	4.35041e-06	6.51273e-05	LOC104922776	XP_027141807.1	lysophosphatidylcholine acyltransferase 1 [Larimichthys crocea]	GO:0005783;GO:0016746;GO:0016021;GO:0006644	endoplasmic reticulum;acyltransferase activity;integral component of membrane;phospholipid metabolic process	K13510	LPCAT1_2	http://www.genome.jp/dbget-bin/www_bget?ko:K13510	Ether lipid metabolism;Glycerophospholipid metabolism	ko00565,ko00564	KOG2898	Predicted phosphate acyltransferase, contains PlsC domain	sp|Q1LWG4|PCAT1_DANRE	Lysophosphatidylcholine acyltransferase 1 OS=Danio rerio OX=7955 GN=lpcat1 PE=2 SV=1
gene21694	682	14.55	130.23	9.16	0.37	0.13	1.37	-6.10525	2.24363e-10	1.05882e-08	LOC104937936	XP_027132936.1	microfibril-associated glycoprotein 4-like [Larimichthys crocea]	-	-	K25409	MFAP4	http://www.genome.jp/dbget-bin/www_bget?ko:K25409	-	-	-	-	sp|P55918|MFAP4_BOVIN	Microfibril-associated glycoprotein 4 OS=Bos taurus OX=9913 GN=MFAP4 PE=1 SV=2
gene10584	5193	2.77	4.97	3.01	1.1	1.07	2.02	-1.00688	0.00861007	0.0374054	LOC104926093	XP_027143104.1;XP_019113985.2	AT-rich interactive domain-containing protein 1A isoform X4 [Larimichthys crocea];AT-rich interactive domain-containing protein 1A isoform X2 [Larimichthys crocea]	GO:0003677;GO:0016514;GO:0035060;GO:0006338	DNA binding;SWI/SNF complex;brahma complex;chromatin remodeling	K11653	ARID1	http://www.genome.jp/dbget-bin/www_bget?ko:K11653	Hepatocellular carcinoma;Thermogenesis	ko05225,ko04714	KOG2510	SWI-SNF chromatin-remodeling complex protein	sp|O14497|ARI1A_HUMAN	AT-rich interactive domain-containing protein 1A OS=Homo sapiens OX=9606 GN=ARID1A PE=1 SV=3
gene11502	1868	789.57	1437.5	541.56	69.48	33.26	88.94	-3.47781	7.51689e-17	1.40029e-14	cd74	NP_001306867.1;XP_010739355.3	HLA class II histocompatibility antigen gamma chain [Larimichthys crocea];HLA class II histocompatibility antigen gamma chain isoform X1 [Larimichthys crocea]	GO:0070206;GO:0042289;GO:0006955;GO:0006886;GO:0035718;GO:0005524;GO:0019882;GO:0016021	protein trimerization;MHC class II protein binding;immune response;intracellular protein transport;macrophage migration inhibitory factor binding;ATP binding;antigen processing and presentation;integral component of membrane	K06505	CD74,DHLAG	http://www.genome.jp/dbget-bin/www_bget?ko:K06505	Tuberculosis;Herpes simplex virus 1 infection;Antigen processing and presentation	ko05152,ko05168,ko04612	-	-	sp|P04441|HG2A_MOUSE;sp|P10247|HG2A_RAT	H-2 class II histocompatibility antigen gamma chain OS=Mus musculus OX=10090 GN=Cd74 PE=1 SV=3;H-2 class II histocompatibility antigen gamma chain OS=Rattus norvegicus OX=10116 GN=Cd74 PE=1 SV=2
gene23125	595	81.41	92.77	24.99	2.37	3.1	8.76	-3.4729	3.32651e-10	1.51225e-08	igfbp7	XP_019120696.1	insulin-like growth factor-binding protein 7 [Larimichthys crocea]	GO:0001558;GO:0005520;GO:0005886;GO:0016021;GO:0005576	regulation of cell growth;insulin-like growth factor binding;plasma membrane;integral component of membrane;extracellular region	K23580	IGFBP7	http://www.genome.jp/dbget-bin/www_bget?ko:K23580	-	-	-	-	sp|Q16270|IBP7_HUMAN	Insulin-like growth factor-binding protein 7 OS=Homo sapiens OX=9606 GN=IGFBP7 PE=1 SV=1
gene17326	8693	2.9	4.07	3.04	0.52	0.47	1.23	-1.86618	1.12401e-07	2.70373e-06	plxnb2	XP_027128827.1	plexin-B2 isoform X1 [Larimichthys crocea]	GO:0016021;GO:0005886;GO:0017154	integral component of membrane;plasma membrane;semaphorin receptor activity	K06821	PLXNB	http://www.genome.jp/dbget-bin/www_bget?ko:K06821	Axon guidance	ko04360	KOG3610	Plexins (functional semaphorin receptors)	sp|B2RXS4|PLXB2_MOUSE	Plexin-B2 OS=Mus musculus OX=10090 GN=Plxnb2 PE=1 SV=1
gene3212	3736	2.19	1.8	1.74	0.19	0.21	0.19	-2.816	2.94212e-08	8.19034e-07	sema3e	KAE8296371.1;XP_019128910.2	Semaphorin-3E Semaphorin-H [Larimichthys crocea];semaphorin-3E isoform X2 [Larimichthys crocea]	GO:0005886;GO:0030215	plasma membrane;semaphorin receptor binding	K06840	SEMA3	http://www.genome.jp/dbget-bin/www_bget?ko:K06840	Axon guidance	ko04360	-	-	sp|P70275|SEM3E_MOUSE;sp|O15041|SEM3E_HUMAN	Semaphorin-3E OS=Mus musculus OX=10090 GN=Sema3e PE=1 SV=3;Semaphorin-3E OS=Homo sapiens OX=9606 GN=SEMA3E PE=1 SV=1
gene9555	2453	13	22	10.72	2.96	1.64	5.96	-1.80382	7.62412e-06	0.000105824	arhgap25	XP_010736785.3	rho GTPase-activating protein 25 [Larimichthys crocea]	GO:0007165;GO:0005096;GO:0043547	signal transduction;GTPase activator activity;positive regulation of GTPase activity	K20642	ARHGAP22_24_25	http://www.genome.jp/dbget-bin/www_bget?ko:K20642	-	-	-	-	sp|Q8BYW1|RHG25_MOUSE	Rho GTPase-activating protein 25 OS=Mus musculus OX=10090 GN=Arhgap25 PE=1 SV=2
gene20089	2187	18	24.3	15.59	3.89	4.89	12.5	-1.24935	0.00145816	0.00882445	mob2	XP_010750575.1;XP_019118636.1;XP_010750574.1;XP_014889581.1	MOB kinase activator 2 isoform X4 [Larimichthys crocea];MOB kinase activator 2 isoform X1 [Larimichthys crocea];MOB kinase activator 2 isoform X3 [Larimichthys crocea];PREDICTED: MOB kinase activator 2 isoform X1 [Poecilia latipinna]	-	-	-	-	-	-	-	KOG0440	Cell cycle-associated protein Mob1-1	sp|Q8VI63|MOB2_MOUSE	MOB kinase activator 2 OS=Mus musculus OX=10090 GN=Mob2 PE=1 SV=1
gene3636	1325	2.03	2.81	2.56	0.49	0.35	0.8	-1.83281	0.00145699	0.00882445	LOC104918578	KAE8283312.1	hypothetical protein D5F01_LYC18714 [Larimichthys crocea]	-	-	-	-	-	-	-	-	-	-	-
gene19493	4001	18.78	25.98	22.05	3.01	3.05	13	-1.62904	0.000247552	0.00199523	LOC104935617	KAE8278581.1;XP_035533403.1;XP_035533404.1;XP_035533406.1;XP_030265024.1	Target of Nesh-SH3 [Larimichthys crocea];target of Nesh-SH3-like isoform X1 [Morone saxatilis];target of Nesh-SH3-like isoform X2 [Morone saxatilis];target of Nesh-SH3-like isoform X4 [Morone saxatilis];target of Nesh-SH3-like isoform X5 [Sparus aurata]	-	-	K24477	ABI3BP	http://www.genome.jp/dbget-bin/www_bget?ko:K24477	-	-	-	-	sp|Q7Z7G0|TARSH_HUMAN	Target of Nesh-SH3 OS=Homo sapiens OX=9606 GN=ABI3BP PE=1 SV=1
novel.12687	650	5.06	7.28	1.46	0.27	0	0.74	-3.51284	0.000630998	0.00439777	-	TKS72526.1	Neuropeptide Y receptor type 2 [Collichthys lucidus]	GO:0031225;GO:0070573;GO:0004983;GO:0046872;GO:0016021;GO:0005886	anchored component of membrane;metallodipeptidase activity;neuropeptide Y receptor activity;metal ion binding;integral component of membrane;plasma membrane	-	-	-	-	-	-	-	-	-
gene20805	2937	2.63	8.78	3.11	0.17	0.29	0.34	-3.71075	9.99881e-10	4.06116e-08	LOC104936977	TMS14920.1	NACHT, LRR and PYD domains-containing protein 12, partial [Larimichthys crocea]	-	-	K22614	NLRC3,NOD3	http://www.genome.jp/dbget-bin/www_bget?ko:K22614	-	-	-	-	sp|P59046|NAL12_HUMAN	NACHT, LRR and PYD domains-containing protein 12 OS=Homo sapiens OX=9606 GN=NLRP12 PE=1 SV=2
gene15416	1663	41.4	69.83	35.8	12.25	11.84	19.64	-1.33035	0.00022329	0.00183673	tmem59	KAE8290653.1	Transmembrane protein 59 Precursor [Larimichthys crocea]	GO:0000139;GO:0016021	Golgi membrane;integral component of membrane	-	-	-	-	-	-	-	sp|Q5R800|TMM59_PONAB	Transmembrane protein 59 OS=Pongo abelii OX=9601 GN=TMEM59 PE=2 SV=1
gene18456	4211	12.84	15.73	7.96	0.95	0.35	2.17	-2.90702	1.98987e-07	4.51475e-06	LOC104934493	XP_010748474.1	protein FAM83F [Larimichthys crocea]	-	-	K23930	FAM83	http://www.genome.jp/dbget-bin/www_bget?ko:K23930	-	-	-	-	sp|Q8NEG4|FA83F_HUMAN	Protein FAM83F OS=Homo sapiens OX=9606 GN=FAM83F PE=1 SV=1
gene5895	839	0.42	6.46	0.37	0	0	0	-6.62206	0.000209766	0.00174518	ifitm5	XP_010731759.1	interferon-induced transmembrane protein 5 [Larimichthys crocea]	GO:0016021	integral component of membrane	K06566	IFITM	http://www.genome.jp/dbget-bin/www_bget?ko:K06566	-	-	-	-	sp|A6NNB3|IFM5_HUMAN	Interferon-induced transmembrane protein 5 OS=Homo sapiens OX=9606 GN=IFITM5 PE=1 SV=1
novel.18916	1964	1.21	2.34	0.9	0.15	0.16	0.3	-2.56764	0.000249103	0.00200578	-	KAE8279474.1	putative RNA-directed DNA polymerase from transposon X-element [Larimichthys crocea]	GO:0016021;GO:0005886;GO:0003964	integral component of membrane;plasma membrane;RNA-directed DNA polymerase activity	K06712	BTN,CD277	http://www.genome.jp/dbget-bin/www_bget?ko:K06712	-	-	-	-	-	-
gene6482	1813	2.2	5.03	1.08	0.17	0.14	0.33	-3.33682	4.13728e-06	6.23132e-05	LOC104921664	XP_010732566.2	B-cell linker protein-like [Larimichthys crocea]	-	-	K07371	BLNK	http://www.genome.jp/dbget-bin/www_bget?ko:K07371	NF-kappa B signaling pathway;Primary immunodeficiency;Epstein-Barr virus infection;Osteoclast differentiation;B cell receptor signaling pathway	ko04064,ko05340,ko05169,ko04380,ko04662	-	-	sp|Q9YGC1|BLNK_CHICK	B-cell linker protein OS=Gallus gallus OX=9031 GN=BLNK PE=1 SV=1
gene490	3822	0.15	0.24	0.33	0	0	0.05	-3.83987	0.00489254	0.023762	adamts18	XP_019109570.1	A disintegrin and metalloproteinase with thrombospondin motifs 18 [Larimichthys crocea]	-	-	K08632	ADAMTS18	http://www.genome.jp/dbget-bin/www_bget?ko:K08632	-	-	-	-	sp|Q8TE60|ATS18_HUMAN	A disintegrin and metalloproteinase with thrombospondin motifs 18 OS=Homo sapiens OX=9606 GN=ADAMTS18 PE=1 SV=3
gene8352	680	5.13	2.51	2.71	0.13	0.64	0.55	-2.5186	0.00506536	0.0244686	tesc	XP_027132649.1	calcineurin B homologous protein 3 [Larimichthys crocea]	GO:0005509	calcium ion binding	K17612	TESC,CHP3	http://www.genome.jp/dbget-bin/www_bget?ko:K17612	-	-	KOG0034	Ca2+/calmodulin-dependent protein phosphatase (calcineurin subunit B), EF-Hand superfamily protein	sp|Q0V9B1|CHP3_XENTR	Calcineurin B homologous protein 3 OS=Xenopus tropicalis OX=8364 GN=tesc PE=2 SV=1
novel.10672	1818	8.53	28.84	7.29	0.41	0.07	0.33	-5.41582	6.38096e-15	8.19143e-13	-	TMS11031.1	hypothetical protein E3U43_020024 [Larimichthys crocea]	GO:0006811;GO:0043269;GO:0099106;GO:0016021	ion transport;regulation of ion transport;ion channel regulator activity;integral component of membrane	-	-	-	-	-	-	-	-	-
novel.15061	821	7.06	8.23	3.91	0.84	1.44	0.71	-2.09591	0.0015295	0.00919335	-	KAB5546393.1	hypothetical protein PHYPO_G00071520 [Pangasianodon hypophthalmus]	GO:0016021	integral component of membrane	-	-	-	-	-	-	-	-	-
gene22466	5652	9.06	11.52	5.1	3.07	1.89	4.28	-1.08917	0.00325519	0.0170833	LOC104938748	XP_010753493.1;XP_010753492.1	E3 ubiquitin-protein ligase DTX4 isoform X2 [Larimichthys crocea];E3 ubiquitin-protein ligase DTX4 isoform X1 [Larimichthys crocea]	GO:0061630;GO:0005737;GO:0008270;GO:0007219	ubiquitin protein ligase activity;cytoplasm;zinc ion binding;Notch signaling pathway	K06058	DTX	http://www.genome.jp/dbget-bin/www_bget?ko:K06058	Notch signaling pathway	ko04330	-	-	sp|Q9Y2E6|DTX4_HUMAN	E3 ubiquitin-protein ligase DTX4 OS=Homo sapiens OX=9606 GN=DTX4 PE=1 SV=2
gene7636	1857	11.69	28.18	7.17	2.11	2.92	3.88	-2.00852	0.000251204	0.00202007	LOC104922919	XP_027141746.1;XP_027141747.1	nuclear body protein SP140-like protein isoform X1 [Larimichthys crocea];nuclear body protein SP140-like protein isoform X2 [Larimichthys crocea]	GO:0003677;GO:0046872;GO:0006959;GO:0045182;GO:0005634;GO:0005737	DNA binding;metal ion binding;humoral immune response;translation regulator activity;nucleus;cytoplasm	K24504	SP140	http://www.genome.jp/dbget-bin/www_bget?ko:K24504	-	-	-	-	sp|Q9H930|SP14L_HUMAN	Nuclear body protein SP140-like protein OS=Homo sapiens OX=9606 GN=SP140L PE=1 SV=3
gene834	5185	9.43	9.01	6.38	1.31	2.17	3.64	-1.4216	0.000307897	0.00240721	jak2	XP_010735096.3	tyrosine-protein kinase JAK2 [Larimichthys crocea]	GO:0045944;GO:0004714;GO:0048514;GO:0005856;GO:0004715;GO:0030218;GO:0046427;GO:0016020;GO:0060215;GO:0005524;GO:0007259;GO:0035556	positive regulation of transcription by RNA polymerase II;transmembrane receptor protein tyrosine kinase activity;blood vessel morphogenesis;cytoskeleton;non-membrane spanning protein tyrosine kinase activity;erythrocyte differentiation;positive regulation of receptor signaling pathway via JAK-STAT;membrane;primitive hemopoiesis;ATP binding;receptor signaling pathway via JAK-STAT;intracellular si…	K04447	JAK2	http://www.genome.jp/dbget-bin/www_bget?ko:K04447	Necroptosis;Signaling pathways regulating pluripotency of stem cells;JAK-STAT signaling pathway;PI3K-Akt signaling pathway;Chemical carcinogenesis - receptor activation;PD-L1 expression and PD-1 checkpoint pathway in cancer;Pathways in cancer;Lipid and atherosclerosis;EGFR tyrosine kinase inhibitor resistance;AGE-RAGE signaling pathway in diabetic complications;Tuberculosis;Leishmaniasis;Toxoplas…	ko04217,ko04550,ko04630,ko04151,ko05207,ko05235,ko05200,ko05417,ko01521,ko04933,ko05152,ko05140,ko05145,ko05161,ko05168,ko05164,ko05167,ko04920,ko04935,ko04917,ko04062,ko04658,ko04659,ko04725	-	-	sp|Q62689|JAK2_RAT	Tyrosine-protein kinase JAK2 OS=Rattus norvegicus OX=10116 GN=Jak2 PE=1 SV=1
gene235	2793	12.99	18.66	5.54	1.03	0.96	3.56	-2.47737	1.04079e-06	1.89468e-05	LOC104940218	TMS19570.1	Calcium/calmodulin-dependent protein kinase type 1, partial [Larimichthys crocea]	-	-	K08794	CAMK1	http://www.genome.jp/dbget-bin/www_bget?ko:K08794	Calcium signaling pathway;Glioma;Aldosterone synthesis and secretion;Oxytocin signaling pathway	ko04020,ko05214,ko04925,ko04921	KOG0032	Ca2+/calmodulin-dependent protein kinase, EF-Hand protein superfamily	sp|Q91YS8|KCC1A_MOUSE	Calcium/calmodulin-dependent protein kinase type 1 OS=Mus musculus OX=10090 GN=Camk1 PE=1 SV=1
gene21345	2768	7.08	10.28	8.48	0.79	0.63	1.68	-2.75065	3.16237e-13	2.75883e-11	LOC104937559	XP_010752117.1	secreted frizzled-related protein 1 [Larimichthys crocea]	GO:0030513;GO:0060059;GO:0005576;GO:0030154;GO:0007275;GO:0061386;GO:0016055;GO:0030177	positive regulation of BMP signaling pathway;embryonic retina morphogenesis in camera-type eye;extracellular region;cell differentiation;multicellular organism development;closure of optic fissure;Wnt signaling pathway;positive regulation of Wnt signaling pathway	K02166	SFRP1	http://www.genome.jp/dbget-bin/www_bget?ko:K02166	Wnt signaling pathway	ko04310	KOG3577	Smoothened and related G-protein-coupled receptors	sp|Q8N474|SFRP1_HUMAN	Secreted frizzled-related protein 1 OS=Homo sapiens OX=9606 GN=SFRP1 PE=1 SV=1
gene20987	2444	1.63	0.03	12.88	0	0	0	-10.3642	0.000467082	0.00341874	LOC104937181	KAE8290484.1;XP_019115790.2	Collagen alpha-1(X) chain Precursor [Larimichthys crocea];complement C1q and tumor necrosis factor-related protein 9A [Larimichthys crocea]	GO:0005581;GO:0005576	collagen trimer;extracellular region	-	-	-	-	-	-	-	sp|A6NHN0|OTOL1_HUMAN	Otolin-1 OS=Homo sapiens OX=9606 GN=OTOL1 PE=3 SV=1
novel.6821	1837	7.63	93.94	8.93	0.13	0.27	0.18	-6.98984	1.02906e-14	1.2199e-12	-	TMS14788.1	hypothetical protein E3U43_021250 [Larimichthys crocea]	-	-	-	-	-	-	-	-	-	-	-
novel.2640	6375	2.49	0.06	4.47	0.04	0.27	0.25	-3.23315	0.00208241	0.0118861	-	XP_027136107.1	zonadhesin-like [Larimichthys crocea]	GO:0008061;GO:0005576	chitin binding;extracellular region	-	-	-	-	-	-	-	-	-
gene9474	1758	5.93	6.16	3.07	2.02	0.95	1.73	-1.23868	0.00842623	0.0367356	fdxr	XP_027145463.1	NADPH:adrenodoxin oxidoreductase, mitochondrial [Larimichthys crocea]	GO:0005739;GO:0015039;GO:0008203	mitochondrion;NADPH-adrenodoxin reductase activity;cholesterol metabolic process	K18914	FDXR	http://www.genome.jp/dbget-bin/www_bget?ko:K18914	-	-	KOG1800	Ferredoxin/adrenodoxin reductase	sp|P82861|ADRO_SALFO	NADPH:adrenodoxin oxidoreductase, mitochondrial OS=Salvelinus fontinalis OX=8038 GN=fdxr PE=2 SV=1
gene15920	2971	9.85	17.92	7.59	0.65	0.87	2.76	-2.77551	1.16453e-08	3.63382e-07	ripk4	XP_019118993.1	receptor-interacting serine/threonine-protein kinase 4 [Larimichthys crocea]	GO:0005524;GO:0004672;GO:0032259;GO:0008168	ATP binding;protein kinase activity;methylation;methyltransferase activity	K08848	RIPK4	http://www.genome.jp/dbget-bin/www_bget?ko:K08848	-	-	-	-	sp|Q9ERK0|RIPK4_MOUSE	Receptor-interacting serine/threonine-protein kinase 4 OS=Mus musculus OX=10090 GN=Ripk4 PE=1 SV=2
gene22259	2105	2.33	2.14	1.02	0.42	0.29	0.67	-1.61901	0.00322902	0.0169604	LOC104938515	KAE8300994.1	Zinc finger BED domain-containing protein 4 [Larimichthys crocea]	GO:0005524;GO:0046983;GO:0016887	ATP binding;protein dimerization activity;ATP hydrolysis activity	K24640	ZBED4	http://www.genome.jp/dbget-bin/www_bget?ko:K24640	-	-	KOG1121	Tam3-transposase (Ac family)	sp|O75132|ZBED4_HUMAN	Zinc finger BED domain-containing protein 4 OS=Homo sapiens OX=9606 GN=ZBED4 PE=1 SV=2
gene19181	4683	3.11	3.25	2.29	0.8	0.65	1.45	-1.37321	4.10386e-05	0.000441499	LOC104935283	XP_027130302.1;KAE8290053.1	A-kinase anchor protein 9 isoform X4 [Larimichthys crocea];Pericentrin Kendrin Pericentrin-B [Larimichthys crocea]	GO:0007165;GO:0005737;GO:0060090;GO:0005815;GO:0003677	signal transduction;cytoplasm;molecular adaptor activity;microtubule organizing center;DNA binding	K16481	PCNT	http://www.genome.jp/dbget-bin/www_bget?ko:K16481	-	-	-	-	sp|O95613|PCNT_HUMAN	Pericentrin OS=Homo sapiens OX=9606 GN=PCNT PE=1 SV=4
gene23088	3146	1.18	1.61	0.82	0.31	0.18	0.51	-1.51199	0.00382063	0.0195175	e2f8	XP_027137366.1	transcription factor E2F8 [Larimichthys crocea]	GO:0005667;GO:0005634;GO:0000978;GO:0006357	transcription regulator complex;nucleus;RNA polymerase II cis-regulatory region sequence-specific DNA binding;regulation of transcription by RNA polymerase II	K09391	E2F7_8	http://www.genome.jp/dbget-bin/www_bget?ko:K09391	-	-	-	-	sp|F1QZ88|E2F8_DANRE	Transcription factor E2F8 OS=Danio rerio OX=7955 GN=e2f8 PE=3 SV=1
gene15298	1030	64.02	74.02	33.84	5.26	1.27	6.4	-3.67335	1.51567e-14	1.72258e-12	LOC104931121	XP_010744354.2	nuclear factor 7, ovary [Larimichthys crocea]	-	-	K12030	TRIM62	http://www.genome.jp/dbget-bin/www_bget?ko:K12030	-	-	-	-	sp|Q91431|NF7O_XENLA	Nuclear factor 7, ovary OS=Xenopus laevis OX=8355 PE=2 SV=1
gene4261	3333	2.87	3.99	3.73	0.64	0.7	1.43	-1.59684	6.97557e-05	0.000694642	lgr4	XP_010729516.1	leucine-rich repeat-containing G-protein coupled receptor 4 [Larimichthys crocea]	GO:0021888;GO:0005886;GO:0016021;GO:0004930	hypothalamus gonadotrophin-releasing hormone neuron development;plasma membrane;integral component of membrane;G protein-coupled receptor activity	K04309	LGR4,GPR48	http://www.genome.jp/dbget-bin/www_bget?ko:K04309	Wnt signaling pathway	ko04310	KOG2087	Glycoprotein hormone receptor	sp|E7FE13|LGR4_DANRE	Leucine-rich repeat-containing G-protein coupled receptor 4 OS=Danio rerio OX=7955 GN=lgr4 PE=2 SV=1
gene18636	1246	2.81	2.27	1.99	0.74	0.32	0.34	-1.84199	0.00640609	0.0295575	LOC104934696	TMS01670.1	hypothetical protein E3U43_003034 [Larimichthys crocea]	-	-	-	-	-	-	-	-	-	-	-
novel.21850	232	760.15	2591.25	361.14	48.23	7.54	62.31	-4.4383	4.21304e-08	1.12481e-06	-	KAE8281740.1	Fish-egg lectin [Larimichthys crocea]	GO:0030246	carbohydrate binding	-	-	-	-	-	-	-	-	-
gene5070	4713	4.45	6.07	3.02	0.87	0.56	1.12	-1.99921	1.74924e-07	4.02651e-06	cnst	XP_010730611.3	consortin [Larimichthys crocea]	GO:0071253;GO:0005802;GO:0042998;GO:0016021	connexin binding;trans-Golgi network;positive regulation of Golgi to plasma membrane protein transport;integral component of membrane	K17581	CNST	http://www.genome.jp/dbget-bin/www_bget?ko:K17581	-	-	-	-	sp|Q6PJW8|CNST_HUMAN	Consortin OS=Homo sapiens OX=9606 GN=CNST PE=1 SV=3
gene12435	1697	20.97	19.53	7.33	1.09	0.55	4.91	-2.71599	6.46736e-06	9.17755e-05	LOC104928078	XP_019128190.2	T-complex protein 11-like protein 1 isoform X1 [Larimichthys crocea]	-	-	-	-	-	-	-	KOG1981	SOK1 kinase belonging to the STE20/SPS1/GC kinase family	sp|Q9NUJ3|T11L1_HUMAN	T-complex protein 11-like protein 1 OS=Homo sapiens OX=9606 GN=TCP11L1 PE=1 SV=1
gene15999	8015	0.97	1.05	0.79	0.23	0.2	0.38	-1.41522	0.000256903	0.00206055	cep290	KAE8296722.1	Centrosomal protein of 290 kDa [Larimichthys crocea]	GO:0042995;GO:0005737;GO:0005856;GO:0030030	cell projection;cytoplasm;cytoskeleton;cell projection organization	K16533	CEP290,NPHP6	http://www.genome.jp/dbget-bin/www_bget?ko:K16533	-	-	-	-	sp|P85001|CE290_DANRE	Centrosomal protein of 290 kDa OS=Danio rerio OX=7955 GN=cep290 PE=2 SV=1
gene4715	3690	4.13	5.23	3.02	1.11	0.9	2.66	-1.10376	0.00361301	0.0186181	LOC104919741	XP_010730122.1	sodium-dependent proline transporter isoform X2 [Larimichthys crocea]	GO:0016021;GO:0015293	integral component of membrane;symporter activity	K05040	SLC6A7,PROT	http://www.genome.jp/dbget-bin/www_bget?ko:K05040	Synaptic vesicle cycle	ko04721	-	-	sp|Q99884|SC6A7_HUMAN	Sodium-dependent proline transporter OS=Homo sapiens OX=9606 GN=SLC6A7 PE=2 SV=2
gene5161	1591	6.17	14.44	3.82	0.12	0.16	0.13	-5.23872	2.54198e-13	2.24847e-11	cers4	XP_027145928.1;TMS20830.1	ceramide synthase 2 [Larimichthys crocea];Ceramide synthase 2 [Larimichthys crocea]	GO:0007275;GO:0016740;GO:0005634;GO:0005789;GO:0016021;GO:0003677;GO:0006665	multicellular organism development;transferase activity;nucleus;endoplasmic reticulum membrane;integral component of membrane;DNA binding;sphingolipid metabolic process	K04710;K24621	CERS1,LASS1;CERS2_4,LASS2_4	http://www.genome.jp/dbget-bin/www_bget?ko:K04710;http://www.genome.jp/dbget-bin/www_bget?ko:K24621	Sphingolipid signaling pathway;Sphingolipid metabolism	ko04071,ko00600	KOG1607	Protein transporter of the TRAM (translocating chain-associating membrane) superfamily	sp|Q8IU89|CERS3_HUMAN;sp|Q5E9R6|CERS4_BOVIN;sp|Q3ZBF8|CERS2_BOVIN	Ceramide synthase 3 OS=Homo sapiens OX=9606 GN=CERS3 PE=1 SV=2;Ceramide synthase 4 OS=Bos taurus OX=9913 GN=CERS4 PE=2 SV=1;Ceramide synthase 2 OS=Bos taurus OX=9913 GN=CERS2 PE=2 SV=1
gene7008	1551	7.34	5.81	4.05	1.21	1.03	2.01	-1.63576	0.000102616	0.000958314	tubb	NP_942113.1	tubulin beta-5 chain [Danio rerio]	GO:0005856;GO:0003924;GO:0005874;GO:0005737;GO:0007017;GO:0005525;GO:0000278;GO:0005198;GO:0005200;GO:0000226;GO:0031101	cytoskeleton;GTPase activity;microtubule;cytoplasm;microtubule-based process;GTP binding;mitotic cell cycle;structural molecule activity;structural constituent of cytoskeleton;microtubule cytoskeleton organization;fin regeneration	K07375	TUBB	http://www.genome.jp/dbget-bin/www_bget?ko:K07375	Gap junction;Phagosome;Pathogenic Escherichia coli infection;Salmonella infection;Alzheimer disease;Amyotrophic lateral sclerosis;Huntington disease;Parkinson disease;Pathways of neurodegeneration - multiple diseases;Prion disease	ko04540,ko04145,ko05130,ko05132,ko05010,ko05014,ko05016,ko05012,ko05022,ko05020	KOG1375	Beta tubulin	sp|Q91575|TBB5_XENLA	Tubulin beta chain OS=Xenopus laevis OX=8355 GN=tubb PE=2 SV=1
gene11109	3353	0.39	1.72	0.53	0.05	0.06	0.18	-2.73241	0.000895176	0.00588455	LOC104926644	XP_027147368.1	partitioning defective 3 homolog B [Larimichthys crocea]	-	-	-	-	-	-	-	KOG3528	FOG: PDZ domain	sp|Q8TEW8|PAR3L_HUMAN	Partitioning defective 3 homolog B OS=Homo sapiens OX=9606 GN=PARD3B PE=1 SV=2
gene19310	5171	1.68	2.2	2.27	0.33	0.1	0.57	-2.38413	1.87449e-06	3.17229e-05	smoc1	KAE8290287.1;XP_019133514.1	SPARC-related modular calcium-binding protein 1 [Larimichthys crocea];SPARC-related modular calcium-binding protein 1 isoform X2 [Larimichthys crocea]	GO:0005576;GO:0005509	extracellular region;calcium ion binding	K24354	SMOC	http://www.genome.jp/dbget-bin/www_bget?ko:K24354	-	-	KOG4578	Uncharacterized conserved protein, contains KAZAL and TY domains	sp|Q8BLY1|SMOC1_MOUSE	SPARC-related modular calcium-binding protein 1 OS=Mus musculus OX=10090 GN=Smoc1 PE=2 SV=2
gene11899	2198	13.3	18.25	10.38	2.88	1.93	1.86	-2.29568	1.00698e-06	1.83854e-05	LOC104927501	TMS07175.1;XP_027135805.1	Calpain-9 [Larimichthys crocea];calpain-9 [Larimichthys crocea]	GO:0004198;GO:0005509	calcium-dependent cysteine-type endopeptidase activity;calcium ion binding	K08578	CAPN9	http://www.genome.jp/dbget-bin/www_bget?ko:K08578	-	-	KOG0045	Cytosolic Ca2+-dependent cysteine protease (calpain), large subunit (EF-Hand protein superfamily)	sp|Q6J756|CAN11_MOUSE;sp|O35920|CAN9_RAT;sp|Q9D805|CAN9_MOUSE	Calpain-11 OS=Mus musculus OX=10090 GN=Capn11 PE=1 SV=1;Calpain-9 OS=Rattus norvegicus OX=10116 GN=Capn9 PE=2 SV=2;Calpain-9 OS=Mus musculus OX=10090 GN=Capn9 PE=2 SV=2
gene2853	3360	2.34	0.98	1.21	0	0.17	0.11	-3.51143	4.02044e-05	0.000434032	LOC104917724	XP_010727552.1	von Willebrand factor C domain-containing protein 2-like [Larimichthys crocea]	GO:0005576;GO:0045202	extracellular region;synapse	K24521	VWC2	http://www.genome.jp/dbget-bin/www_bget?ko:K24521	-	-	-	-	sp|B0UZC8|VWC2L_DANRE	von Willebrand factor C domain-containing protein 2-like OS=Danio rerio OX=7955 GN=vwc2l PE=2 SV=1
gene172	4148	13.69	8.96	7.79	1.23	0.7	1.94	-2.66211	3.24621e-14	3.37933e-12	tcf7l2	XP_012737833.1;XP_029977587.1;XP_029977590.1;XP_035516204.1;XP_038591308.1;XP_015818101.1;XP_027145298.1;XP_035516179.1;XP_015238605.1;XP_027145302.1;XP_027145303.1;XP_027145296.1	transcription factor 7-like 2 isoform X25 [Fundulus heteroclitus];transcription factor 7-like 2 isoform X3 [Sphaeramia orbicularis];transcription factor 7-like 2 isoform X6 [Sphaeramia orbicularis];transcription factor 7-like 2 isoform X6 [Morone saxatilis];transcription factor 7-like 2 isoform X3 [Micropterus salmoides];PREDICTED: transcription factor 7-like 2 isoform X13 [Nothobranchius furzeri…	GO:0016055	Wnt signaling pathway	K04491	TCF7L2	http://www.genome.jp/dbget-bin/www_bget?ko:K04491	Adherens junction;Hippo signaling pathway;Wnt signaling pathway;Pathways in cancer;Acute myeloid leukemia;Basal cell carcinoma;Breast cancer;Colorectal cancer;Endometrial cancer;Gastric cancer;Hepatocellular carcinoma;Prostate cancer;Thyroid cancer;Arrhythmogenic right ventricular cardiomyopathy;Alcoholic liver disease;Cushing syndrome;Salmonella infection;Human papillomavirus infection;Kaposi sa…	ko04520,ko04390,ko04310,ko05200,ko05221,ko05217,ko05224,ko05210,ko05213,ko05226,ko05225,ko05215,ko05216,ko05412,ko04936,ko04934,ko05132,ko05165,ko05167,ko04916	KOG3248	Transcription factor TCF-4	sp|Q924A0|TF7L2_MOUSE;sp|Q9NQB0|TF7L2_HUMAN	Transcription factor 7-like 2 OS=Mus musculus OX=10090 GN=Tcf7l2 PE=1 SV=2;Transcription factor 7-like 2 OS=Homo sapiens OX=9606 GN=TCF7L2 PE=1 SV=2
novel.18044	394	8.67	12.14	13.58	0.83	1.14	2.53	-2.77891	0.00125526	0.00781614	-	TKS65258.1	RNA-directed DNA polymerase from mobile element jockey [Collichthys lucidus]	GO:0005576;GO:0005179;GO:0003964	extracellular region;hormone activity;RNA-directed DNA polymerase activity	-	-	-	-	-	-	-	-	-
novel.21011	846	39.67	20.55	33.1	8.58	8.33	12.35	-1.26925	0.00258294	0.0141707	-	KAE8277523.1	hypothetical protein D5F01_LYC24519 [Larimichthys crocea]	GO:0016021	integral component of membrane	K11757	PBRM1,PB1	http://www.genome.jp/dbget-bin/www_bget?ko:K11757	Hepatocellular carcinoma	ko05225	-	-	-	-
gene18365	1002	0.41	1.03	0.76	0	0.07	0	-4.37637	0.00895271	0.0385962	LOC104934401	XP_019112990.1	protein APCDD1 isoform X1 [Larimichthys crocea]	GO:0017147;GO:0005886;GO:0016021;GO:0030178	Wnt-protein binding;plasma membrane;integral component of membrane;negative regulation of Wnt signaling pathway	-	-	-	-	-	-	-	sp|Q5R2J4|APCD1_PELSI	Protein APCDD1 OS=Pelodiscus sinensis OX=13735 GN=APCDD1 PE=2 SV=1
gene9428	4535	0.15	0.08	0.19	0	0.01	0	-4.57418	0.00535785	0.0256118	LOC104924855	XP_019117599.1	neurocan core protein [Larimichthys crocea]	GO:0005886;GO:0007155;GO:0005576;GO:0005540;GO:0005509;GO:0030246	plasma membrane;cell adhesion;extracellular region;hyaluronic acid binding;calcium ion binding;carbohydrate binding	K06794	NCAN,CSPG3	http://www.genome.jp/dbget-bin/www_bget?ko:K06794	-	-	-	-	sp|Q5IS41|NCAN_PANTR	Neurocan core protein OS=Pan troglodytes OX=9598 GN=NCAN PE=2 SV=1
gene22672	1612	0.58	1.49	0.88	0.19	0.04	0.13	-2.64447	0.00425182	0.0212514	LOC104938967	XP_010753731.1	uncharacterized protein LOC104938967 [Larimichthys crocea]	GO:0005886;GO:0016021	plasma membrane;integral component of membrane	-	-	-	-	-	-	-	sp|P18181|CD48_MOUSE	CD48 antigen OS=Mus musculus OX=10090 GN=Cd48 PE=1 SV=1
novel.16398	780	0.59	1.59	1.09	0	0	0	-5.38928	0.00205385	0.011752	-	XP_025756452.1	uncharacterized protein K02A2.6-like [Oreochromis niloticus]	GO:0016021	integral component of membrane	-	-	-	-	-	-	-	-	-
gene3169	5230	10.8	14.2	8.4	3	2.55	8.48	-1.00094	0.00609533	0.0283851	LOC104918082	XP_027145748.1;XP_027145754.1	unconventional myosin-IXb isoform X3 [Larimichthys crocea];unconventional myosin-IXb isoform X9 [Larimichthys crocea]	GO:0007266;GO:0005096;GO:0000146;GO:0030048;GO:0043547	Rho protein signal transduction;GTPase activator activity;microfilament motor activity;actin filament-based movement;positive regulation of GTPase activity	K10360	MYO9	http://www.genome.jp/dbget-bin/www_bget?ko:K10360	-	-	KOG4229;KOG1453	Myosin VII, myosin IXB and related myosins;Chimaerin and related Rho GTPase activating proteins	sp|Q13459|MYO9B_HUMAN;sp|Q63358|MYO9B_RAT	Unconventional myosin-IXb OS=Homo sapiens OX=9606 GN=MYO9B PE=1 SV=3;Unconventional myosin-IXb OS=Rattus norvegicus OX=10116 GN=Myo9b PE=1 SV=1
gene23371	1845	13.52	24.53	6.31	2.75	1.49	5.15	-1.43502	0.00685783	0.0312284	LOC104939708	XP_019134976.2	uncharacterized protein LOC104939709 isoform X6 [Larimichthys crocea]	GO:0004672;GO:0005524;GO:0006397;GO:0004540	protein kinase activity;ATP binding;mRNA processing;ribonuclease activity	-	-	-	-	-	KOG0583;KOG1027	Serine/threonine protein kinase;Serine/threonine protein kinase and endoribonuclease ERN1/IRE1, sensor of the unfolded protein response pathway	sp|O94537|IRE1_SCHPO	Sensor for unfolded proteins in the ER ire1 OS=Schizosaccharomyces pombe (strain 972 / ATCC 24843) OX=284812 GN=ire1 PE=1 SV=1
gene12674	1294	10.99	6.8	6.49	0.4	0.51	0.93	-3.34923	3.00062e-11	1.69347e-09	igfbp2	XP_010740885.1	insulin-like growth factor-binding protein 2 [Larimichthys crocea]	GO:0031994;GO:0048640;GO:0016021;GO:0043567;GO:0031995;GO:0008285;GO:0008156;GO:0007507;GO:0005576;GO:0001525;GO:0005520;GO:0040008	insulin-like growth factor I binding;negative regulation of developmental growth;integral component of membrane;regulation of insulin-like growth factor receptor signaling pathway;insulin-like growth factor II binding;negative regulation of cell population proliferation;negative regulation of DNA replication;heart development;extracellular region;angiogenesis;insulin-like growth factor binding;re…	K23575	IGFBP2	http://www.genome.jp/dbget-bin/www_bget?ko:K23575	-	-	-	-	sp|Q9PTH3|IBP2A_DANRE	Insulin-like growth factor-binding protein 2-A OS=Danio rerio OX=7955 GN=igfbp2a PE=1 SV=1
gene6868	1772	2.53	8.51	4.06	0.48	0.8	1.42	-2.10959	0.000314962	0.00245548	sdc3	XP_027143137.1	syndecan-3 [Larimichthys crocea]	GO:0016021	integral component of membrane	K16337	SDC3	http://www.genome.jp/dbget-bin/www_bget?ko:K16337	Cell adhesion molecules	ko04514	-	-	sp|P26261|SDC3_CHICK	Syndecan-3 OS=Gallus gallus OX=9031 GN=SDC3 PE=2 SV=2
novel.8709	359	1.95	41.02	21.07	0	0	1.18	-6.18296	0.000141834	0.00125862	-	-	-	-	-	-	-	-	-	-	-	-	-	-
novel.21781	419	1.65	4.78	3.73	0	0	0.37	-4.2867	0.0122672	0.0495245	-	-	-	-	-	-	-	-	-	-	-	-	-	-
gene8977	2542	5.33	9.32	2.93	1.12	0.28	0.59	-2.67758	9.60335e-06	0.000128543	plekhg7	XP_010735996.3	pleckstrin homology domain-containing family G member 7 [Larimichthys crocea]	GO:0005085	guanyl-nucleotide exchange factor activity	-	-	-	-	-	-	-	sp|Q6ZR37|PKHG7_HUMAN	Pleckstrin homology domain-containing family G member 7 OS=Homo sapiens OX=9606 GN=PLEKHG7 PE=2 SV=1
novel.6601	762	1.9	5.34	9.28	0.65	0.44	2.08	-2.2144	0.00576466	0.0270553	-	-	-	-	-	-	-	-	-	-	-	-	-	-
gene6982	2697	14.74	13.8	11.32	3.02	2	7.48	-1.40648	9.17138e-05	0.000872285	tpd52	KAE8281852.1	Tumor protein D52 [Larimichthys crocea]	-	-	-	-	-	-	-	-	-	sp|P55327|TPD52_HUMAN;sp|Q95212|TPD52_RABIT	Tumor protein D52 OS=Homo sapiens OX=9606 GN=TPD52 PE=1 SV=2;Tumor protein D52 OS=Oryctolagus cuniculus OX=9986 GN=TPD52 PE=2 SV=1
gene1957	1328	4.63	4.23	6.98	0.96	0.15	0.69	-2.80878	1.34248e-05	0.000171009	osr2	XP_019116402.1	protein odd-skipped-related 2 isoform X2 [Larimichthys crocea]	-	-	K09215	OSR,ODD	http://www.genome.jp/dbget-bin/www_bget?ko:K09215	-	-	KOG1721	FOG: Zn-finger	sp|Q6AY34|OSR2_RAT;sp|Q32NK7|OSR2A_XENLA	Protein odd-skipped-related 2 OS=Rattus norvegicus OX=10116 GN=Osr2 PE=2 SV=1;Protein odd-skipped-related 2-A OS=Xenopus laevis OX=8355 GN=osr2-a PE=2 SV=1
novel.8643	1332	6.95	12.29	4.24	1.02	0.2	1.11	-2.98419	7.85276e-07	1.48288e-05	-	KAE8280819.1	hypothetical protein D5F01_LYC21383 [Larimichthys crocea]	GO:0004864;GO:0007165	protein phosphatase inhibitor activity;signal transduction	-	-	-	-	-	-	-	-	-
gene1211	3201	1.66	2.15	1.23	0.42	0.29	0.73	-1.46207	0.00132752	0.00818378	uhrf1	XP_010740455.2	E3 ubiquitin-protein ligase UHRF1 isoform X1 [Larimichthys crocea]	GO:0046872;GO:0005634;GO:0003677;GO:0016740;GO:0016567;GO:0051213;GO:0032454;GO:0007049	metal ion binding;nucleus;DNA binding;transferase activity;protein ubiquitination;dioxygenase activity;histone H3-methyl-lysine-9 demethylase activity;cell cycle	K10638	UHRF1,NP95	http://www.genome.jp/dbget-bin/www_bget?ko:K10638	-	-	-	-	sp|E7EZF3|UHRF1_DANRE	E3 ubiquitin-protein ligase UHRF1 OS=Danio rerio OX=7955 GN=uhrf1 PE=1 SV=1
gene10681	3170	2.15	1.5	1.41	0.71	0.22	0.27	-1.58594	0.010685	0.0444853	lrrcc1	XP_019121827.2	leucine-rich repeat and coiled-coil domain-containing protein 1 [Larimichthys crocea]	-	-	K16475	LRRCC1,CLERC	http://www.genome.jp/dbget-bin/www_bget?ko:K16475	-	-	-	-	sp|Q6NRC9|LRCC1_XENLA	Leucine-rich repeat and coiled-coil domain-containing protein 1 OS=Xenopus laevis OX=8355 GN=lrrcc1 PE=2 SV=1
gene20211	1981	0.94	3.31	2.02	0.3	0.18	0.59	-2.23827	0.000687623	0.004735	il7r	XP_010750716.2	interleukin-7 receptor subunit alpha [Larimichthys crocea]	GO:0016021;GO:0004896	integral component of membrane;cytokine receptor activity	K05072	IL7R,CD127	http://www.genome.jp/dbget-bin/www_bget?ko:K05072	FoxO signaling pathway;JAK-STAT signaling pathway;PI3K-Akt signaling pathway;Cytokine-cytokine receptor interaction;Pathways in cancer;Primary immunodeficiency;Hematopoietic cell lineage	ko04068,ko04630,ko04151,ko04060,ko05200,ko05340,ko04640	-	-	sp|A0MSX9|IL7RA_HORSE	Interleukin-7 receptor subunit alpha OS=Equus caballus OX=9796 GN=IL7R PE=2 SV=1
novel.19337	4276	3.11	3.76	1.92	0.57	0.29	1.11	-1.85496	1.74465e-05	0.000214412	-	TKS91179.1	hypothetical protein D9C73_026623 [Collichthys lucidus]	-	-	-	-	-	-	-	-	-	-	-
gene8241	2258	10.82	7.57	5.59	0.5	0.67	1.35	-2.9129	2.07969e-11	1.22682e-09	LOC104923569	XP_027140390.1	dihydroxyacetone phosphate acyltransferase isoform X2 [Larimichthys crocea]	GO:0005783;GO:0044255;GO:0008374	endoplasmic reticulum;cellular lipid metabolic process;O-acyltransferase activity	K00649	GNPAT	http://www.genome.jp/dbget-bin/www_bget?ko:K00649	Peroxisome;Glycerophospholipid metabolism	ko04146,ko00564	KOG3729	Mitochondrial glycerol-3-phosphate acyltransferase GPAT	sp|O15228|GNPAT_HUMAN	Dihydroxyacetone phosphate acyltransferase OS=Homo sapiens OX=9606 GN=GNPAT PE=1 SV=1
gene10321	1029	6.45	18.5	4.02	0.34	0.55	0.44	-3.91161	5.55611e-08	1.44914e-06	LOC104925796	XP_010737801.3	claudin-4 [Larimichthys crocea]	GO:0005886;GO:0005923;GO:0016021;GO:0005198	plasma membrane;bicellular tight junction;integral component of membrane;structural molecule activity	K06087	CLDN	http://www.genome.jp/dbget-bin/www_bget?ko:K06087	Tight junction;Cell adhesion molecules;Pathogenic Escherichia coli infection;Hepatitis C;Leukocyte transendothelial migration	ko04530,ko04514,ko05130,ko05160,ko04670	-	-	sp|O19005|CLD4_CHLAE	Claudin-4 OS=Chlorocebus aethiops OX=9534 GN=CLDN4 PE=2 SV=1
gene9862	2757	31.2	26.17	12.47	6.38	4.15	14.7	-1.17245	0.00509761	0.0245764	gnai1	KAA8580265.1	hypothetical protein FQN60_005800 [Etheostoma spectabile]	GO:0003924;GO:0031683;GO:0007188;GO:0005525	GTPase activity;G-protein beta/gamma-subunit complex binding;adenylate cyclase-modulating G protein-coupled receptor signaling pathway;GTP binding	K04630	GNAI	http://www.genome.jp/dbget-bin/www_bget?ko:K04630	Gap junction;Apelin signaling pathway;Rap1 signaling pathway;Sphingolipid signaling pathway;cAMP signaling pathway;cGMP-PKG signaling pathway;Chemical carcinogenesis - receptor activation;Pathways in cancer;Cushing syndrome;Pertussis;Chagas disease;Toxoplasmosis;Human cytomegalovirus infection;Human immunodeficiency virus 1 infection;Parkinson disease;Alcoholism;Cocaine addiction;Morphine addicti…	ko04540,ko04371,ko04015,ko04071,ko04024,ko04022,ko05207,ko05200,ko04934,ko05133,ko05142,ko05145,ko05163,ko05170,ko05012,ko05034,ko05030,ko05032,ko04261,ko04360,ko04971,ko04915,ko04935,ko04916,ko04921,ko04928,ko04914,ko04923,ko04926,ko04924,ko04713,ko04062,ko04670,ko04611,ko04725,ko04728,ko04727,ko04724,ko04730,ko04723,ko04726	KOG0082	G-protein alpha subunit (small G protein superfamily)	sp|P10824|GNAI1_RAT	Guanine nucleotide-binding protein G(i) subunit alpha-1 OS=Rattus norvegicus OX=10116 GN=Gnai1 PE=1 SV=3
gene18612	3799	1.03	3.26	0.92	0.4	0.33	0.4	-1.73042	0.0046187	0.022705	itga10	XP_019109490.2	integrin alpha-10 [Larimichthys crocea]	GO:0008305;GO:0007155;GO:0007229;GO:0046872	integrin complex;cell adhesion;integrin-mediated signaling pathway;metal ion binding	K06586	ITGA10	http://www.genome.jp/dbget-bin/www_bget?ko:K06586	Regulation of actin cytoskeleton;Focal adhesion;PI3K-Akt signaling pathway;ECM-receptor interaction;Arrhythmogenic right ventricular cardiomyopathy;Dilated cardiomyopathy;Hypertrophic cardiomyopathy;Human papillomavirus infection	ko04810,ko04510,ko04151,ko04512,ko05412,ko05414,ko05410,ko05165	-	-	sp|O75578|ITA10_HUMAN	Integrin alpha-10 OS=Homo sapiens OX=9606 GN=ITGA10 PE=2 SV=2
gene22482	2017	6.36	11.1	5.35	1.13	0.36	1.67	-2.54684	2.07002e-07	4.67944e-06	LOC104938763	XP_010753510.2	ras association domain-containing protein 10 [Larimichthys crocea]	GO:0007165	signal transduction	K09856	RASSF9_10	http://www.genome.jp/dbget-bin/www_bget?ko:K09856	-	-	-	-	sp|B1A193|RASFA_XENLA	Ras association domain-containing protein 10 OS=Xenopus laevis OX=8355 GN=rassf10 PE=2 SV=1
gene5009	4427	4.18	7.58	4.8	1.08	0.84	2.37	-1.5868	2.76006e-05	0.000316296	pkp4	TMS06909.1;XP_019115385.2	Plakophilin-4 [Larimichthys crocea];plakophilin-4 isoform X6 [Larimichthys crocea]	-	-	-	-	-	-	-	KOG1048	Neural adherens junction protein Plakophilin and related Armadillo repeat proteins	sp|Q99569|PKP4_HUMAN	Plakophilin-4 OS=Homo sapiens OX=9606 GN=PKP4 PE=1 SV=2
gene8139	3369	2.74	2.87	2.23	0.03	0.2	0.02	-4.49806	6.27403e-09	2.10916e-07	LOC104923472	XP_019118899.1	protein-lysine 6-oxidase [Larimichthys crocea]	GO:0018057;GO:0005615;GO:0005507;GO:0004720	peptidyl-lysine oxidation;extracellular space;copper ion binding;protein-lysine 6-oxidase activity	K00277	LOX	http://www.genome.jp/dbget-bin/www_bget?ko:K00277	-	-	-	-	sp|P28301|LYOX_MOUSE;sp|Q05063|LYOX_CHICK	Protein-lysine 6-oxidase OS=Mus musculus OX=10090 GN=Lox PE=1 SV=1;Protein-lysine 6-oxidase OS=Gallus gallus OX=9031 GN=LOX PE=1 SV=1
novel.21785	455	638.9	643.43	267.36	153.59	65.77	206.46	-1.47293	0.000563111	0.00399409	-	-	-	-	-	-	-	-	-	-	-	-	-	-
gene23183	2005	2.31	8.52	2.12	0.52	0.58	2.02	-1.7676	0.00625627	0.0289838	LOC104939505	XP_019132707.2;XP_027141911.1	protein NLRC3-like isoform X2 [Larimichthys crocea];protein NLRC3-like isoform X1 [Larimichthys crocea]	GO:0046872	metal ion binding	K22614	NLRC3,NOD3	http://www.genome.jp/dbget-bin/www_bget?ko:K22614	-	-	-	-	sp|Q5DU56|NLRC3_MOUSE	Protein NLRC3 OS=Mus musculus OX=10090 GN=Nlrc3 PE=1 SV=2
gene19340	3180	2.61	4.44	1.71	0.43	0.83	1.41	-1.32903	0.0107855	0.0448051	LOC104935458	TKS81075.1	Septin-4 Brain protein H5 [Collichthys lucidus]	GO:0005525	GTP binding	K16943	SEPT4	http://www.genome.jp/dbget-bin/www_bget?ko:K16943	Apoptosis;Apoptosis - multiple species	ko04210,ko04215	-	-	sp|P28661|SEPT4_MOUSE	Septin-4 OS=Mus musculus OX=10090 GN=Septin4 PE=1 SV=1
novel.13293	247	208.76	692.9	109.14	3.79	27.68	30.17	-3.52055	6.08122e-05	0.000619663	-	XP_034752102.1	tripartite motif-containing protein 16-like protein, partial [Etheostoma cragini]	GO:0008270	zinc ion binding	-	-	-	-	-	-	-	-	-
gene12582	1786	26.14	30.05	9.58	6.2	3.77	12.39	-1.26341	0.00715017	0.0322453	LOC104928227	XP_010740777.3	caspase-3-like [Larimichthys crocea]	GO:0004197;GO:0005737;GO:0006915	cysteine-type endopeptidase activity;cytoplasm;apoptotic process	K02187	CASP3	http://www.genome.jp/dbget-bin/www_bget?ko:K02187	Apoptosis;Apoptosis - multiple species;p53 signaling pathway;MAPK signaling pathway;TNF signaling pathway;MicroRNAs in cancer;Pathways in cancer;Proteoglycans in cancer;Viral carcinogenesis;Colorectal cancer;Small cell lung cancer;Lipid and atherosclerosis;Viral myocarditis;Platinum drug resistance;AGE-RAGE signaling pathway in diabetic complications;Alcoholic liver disease;Non-alcoholic fatty li…	ko04210,ko04215,ko04115,ko04010,ko04668,ko05206,ko05200,ko05205,ko05203,ko05210,ko05222,ko05417,ko05416,ko01524,ko04933,ko04936,ko04932,ko05120,ko05134,ko05130,ko05133,ko05132,ko05152,ko05146,ko05145,ko05169,ko05161,ko05160,ko05168,ko05163,ko05170,ko05165,ko05164,ko05167,ko05162,ko05010,ko05014,ko05016,ko05012,ko05022,ko05020,ko04657,ko04650,ko04726	-	-	sp|Q60431|CASP3_MESAU	Caspase-3 OS=Mesocricetus auratus OX=10036 GN=CASP3 PE=2 SV=1
gene8489	1570	0.78	1.08	1.07	0	0	0	-6.59134	6.61516e-06	9.33887e-05	edar	KAF1382408.1	hypothetical protein PFLUV_G00143480 [Perca fluviatilis]	GO:0016021	integral component of membrane	K05162	EDAR	http://www.genome.jp/dbget-bin/www_bget?ko:K05162	NF-kappa B signaling pathway;Cytokine-cytokine receptor interaction	ko04064,ko04060	-	-	sp|Q90VY2|EDAR_ORYLA	Tumor necrosis factor receptor superfamily member EDAR OS=Oryzias latipes OX=8090 GN=edar PE=2 SV=1
gene5231	6944	0.91	1.25	0.57	0.2	0.23	0.29	-1.46886	0.00212393	0.0120666	kntc1	XP_010730821.3;XP_010730820.3	kinetochore-associated protein 1 isoform X2 [Larimichthys crocea];kinetochore-associated protein 1 isoform X1 [Larimichthys crocea]	-	-	K11577	KNTC1,ROD	http://www.genome.jp/dbget-bin/www_bget?ko:K11577	-	-	-	-	sp|P50748|KNTC1_HUMAN	Kinetochore-associated protein 1 OS=Homo sapiens OX=9606 GN=KNTC1 PE=1 SV=1
gene14803	1201	5.06	2.72	5.21	0.33	0.73	0.84	-2.36449	0.000159965	0.00138867	ucma	XP_010743728.1	unique cartilage matrix-associated protein [Larimichthys crocea]	GO:0005576;GO:0045667	extracellular region;regulation of osteoblast differentiation	-	-	-	-	-	-	-	sp|B9TQX3|UCMA_DICLA	Unique cartilage matrix-associated protein OS=Dicentrarchus labrax OX=13489 GN=ucma PE=2 SV=1
gene505	3702	4.54	4.22	2.77	0.66	0.5	1.41	-1.87361	4.63628e-06	6.8672e-05	tmco3	TMS13562.1	Transmembrane and coiled-coil domain-containing protein 3 [Larimichthys crocea]	GO:0015299;GO:0016021	solute:proton antiporter activity;integral component of membrane	-	-	-	-	-	-	-	sp|Q8BH01|TMCO3_MOUSE	Transmembrane and coiled-coil domain-containing protein 3 OS=Mus musculus OX=10090 GN=Tmco3 PE=2 SV=1
gene2300	5406	3.99	1.73	3.47	0.39	0.43	1.03	-2.02471	2.51858e-05	0.000293926	thbs2	XP_010754909.1;XP_010754916.1	thrombospondin-2 isoform X1 [Larimichthys crocea];thrombospondin-2 isoform X2 [Larimichthys crocea]	GO:0005509;GO:0005576;GO:0008201;GO:0007155;GO:0016525	calcium ion binding;extracellular region;heparin binding;cell adhesion;negative regulation of angiogenesis	K04659	THBS2S	http://www.genome.jp/dbget-bin/www_bget?ko:K04659	Focal adhesion;Phagosome;PI3K-Akt signaling pathway;ECM-receptor interaction;Malaria;Human papillomavirus infection	ko04510,ko04145,ko04151,ko04512,ko05144,ko05165	-	-	sp|P35440|TSP2_CHICK	Thrombospondin-2 OS=Gallus gallus OX=9031 GN=THBS2 PE=2 SV=1
gene19031	870	35.78	62.55	31.31	11.6	8.61	23.04	-1.24698	0.00110938	0.00703147	LOC104935112	NP_001005967.1	H2A.X variant histone family member 1 [Danio rerio]	GO:0006342;GO:0005634;GO:0005615;GO:0046982;GO:0045087;GO:0000786;GO:0050830;GO:0003677;GO:0051673	heterochromatin assembly;nucleus;extracellular space;protein heterodimerization activity;innate immune response;nucleosome;defense response to Gram-positive bacterium;DNA binding;membrane disruption in other organism	K11251	H2A	http://www.genome.jp/dbget-bin/www_bget?ko:K11251	Necroptosis;Systemic lupus erythematosus;Alcoholism;Neutrophil extracellular trap formation	ko04217,ko05322,ko05034,ko04613	-	-	sp|P02264|H2A_ONCMY	Histone H2A OS=Oncorhynchus mykiss OX=8022 PE=1 SV=2
gene1564	3671	18.02	12.29	16.65	3.79	5.88	6.45	-1.09403	0.00950187	0.0405056	LOC104931783	XP_027144310.1	RNA-binding protein 10-like [Larimichthys crocea]	GO:0003723;GO:0042981;GO:0005634;GO:0046872;GO:0008380;GO:0000381	RNA binding;regulation of apoptotic process;nucleus;metal ion binding;RNA splicing;regulation of alternative mRNA splicing, via spliceosome	K13094	RBM5_10	http://www.genome.jp/dbget-bin/www_bget?ko:K13094	-	-	KOG0154	RNA-binding protein RBM5 and related proteins, contain G-patch and RRM domains	sp|P98175|RBM10_HUMAN	RNA-binding protein 10 OS=Homo sapiens OX=9606 GN=RBM10 PE=1 SV=3
gene3798	1810	4.94	9.1	5.62	0.81	1.6	2.55	-1.60612	0.00106122	0.00678416	LOC104918775	TMS20412.1	Granzyme B(G,H), partial [Larimichthys crocea]	GO:0004252;GO:0005615	serine-type endopeptidase activity;extracellular space	K09616	GZMH,CTSGL2	http://www.genome.jp/dbget-bin/www_bget?ko:K09616	-	-	-	-	sp|P04187|GRAB_MOUSE	Granzyme B(G,H) OS=Mus musculus OX=10090 GN=Gzmb PE=1 SV=1
gene18812	1013	9.8	6.91	6.44	2.29	1.06	4.67	-1.25502	0.00833425	0.0364179	LOC104934879	XP_019112899.1	serine protease HTRA3 [Larimichthys crocea]	GO:0005576;GO:0004252;GO:0005520	extracellular region;serine-type endopeptidase activity;insulin-like growth factor binding	K08785	HTRA3	http://www.genome.jp/dbget-bin/www_bget?ko:K08785	-	-	KOG1320	Serine protease	sp|D3ZA76|HTRA3_RAT	Serine protease HTRA3 OS=Rattus norvegicus OX=10116 GN=Htra3 PE=2 SV=1
gene18019	5182	9.21	12.23	5.98	1.27	0.76	2.44	-2.30916	1.35505e-09	5.33747e-08	LOC104934021	TMS18746.1	Band 4.1-like protein 1 [Larimichthys crocea]	-	-	K23961	EPB41L1_2_3	http://www.genome.jp/dbget-bin/www_bget?ko:K23961	-	-	KOG3527	Erythrocyte membrane protein 4.1 and related proteins of the ERM family	sp|Q9WTP0|E41L1_RAT	Band 4.1-like protein 1 OS=Rattus norvegicus OX=10116 GN=Epb41l1 PE=1 SV=1
novel.20416	258	245	367.37	77.02	14.07	43.77	56.34	-2.07459	0.00471251	0.02307	-	TKS65145.1	Metabotropic glutamate receptor 7 [Collichthys lucidus]	GO:0005886;GO:0016021;GO:0004930	plasma membrane;integral component of membrane;G protein-coupled receptor activity	-	-	-	-	-	-	-	-	-
gene22879	2031	3.07	2.45	1.26	0.12	0.03	0.1	-4.40065	1.15374e-08	3.60468e-07	gcm2	XP_019126548.1	chorion-specific transcription factor GCMb [Larimichthys crocea]	GO:0005634;GO:0007275;GO:0003677;GO:0001228	nucleus;multicellular organism development;DNA binding;DNA-binding transcription activator activity, RNA polymerase II-specific	K21598	GCM	http://www.genome.jp/dbget-bin/www_bget?ko:K21598	Parathyroid hormone synthesis, secretion and action	ko04928	-	-	sp|O75603|GCM2_HUMAN	Chorion-specific transcription factor GCMb OS=Homo sapiens OX=9606 GN=GCM2 PE=1 SV=1
gene13429	1979	6.47	12.63	4.26	0.45	0.4	0.72	-3.47844	1.58484e-11	9.64767e-10	LOC104929125	KAE8295973.1;XP_010741874.3	Synaptotagmin-5 Synaptotagmin IX [Larimichthys crocea];synaptotagmin-2-like isoform X1 [Larimichthys crocea]	GO:0016021	integral component of membrane	K19902	SYT2	http://www.genome.jp/dbget-bin/www_bget?ko:K19902	-	-	KOG1028	Ca2+-dependent phospholipid-binding protein Synaptotagmin, required for synaptic vesicle and secretory granule exocytosis	sp|P46097|SYT2_MOUSE	Synaptotagmin-2 OS=Mus musculus OX=10090 GN=Syt2 PE=1 SV=1
gene3751	3873	0.26	0.73	0.33	0.09	0.06	0.12	-1.92108	0.0123153	0.0497027	usp31	KAE8283365.1	Ubiquitin carboxyl-terminal hydrolase 31 [Larimichthys crocea]	GO:0006511;GO:0016579;GO:0004843	ubiquitin-dependent protein catabolic process;protein deubiquitination;thiol-dependent deubiquitinase	K11852	USP31	http://www.genome.jp/dbget-bin/www_bget?ko:K11852	-	-	KOG1870	Ubiquitin C-terminal hydrolase	sp|Q70CQ4|UBP31_HUMAN	Ubiquitin carboxyl-terminal hydrolase 31 OS=Homo sapiens OX=9606 GN=USP31 PE=2 SV=2
gene4798	3313	3.67	4.06	0.98	0.3	0.16	0.52	-2.87496	1.9985e-06	3.34107e-05	LOC104919853	XP_019117375.2	protein sel-1 homolog 3 [Larimichthys crocea]	GO:0016021	integral component of membrane	-	-	-	-	-	-	-	sp|Q80TS8|SE1L3_MOUSE;sp|Q68CR1|SE1L3_HUMAN	Protein sel-1 homolog 3 OS=Mus musculus OX=10090 GN=Sel1l3 PE=2 SV=3;Protein sel-1 homolog 3 OS=Homo sapiens OX=9606 GN=SEL1L3 PE=1 SV=2
gene3194	1597	21.34	23.08	14.92	1.52	1.66	4.6	-2.63004	1.06861e-11	6.75407e-10	LOC104918109	XP_010728051.1	MOB kinase activator 2 isoform X1 [Larimichthys crocea]	GO:0016301	kinase activity	-	-	-	-	-	KOG0440	Cell cycle-associated protein Mob1-1	sp|Q8VI63|MOB2_MOUSE	MOB kinase activator 2 OS=Mus musculus OX=10090 GN=Mob2 PE=1 SV=1
gene6448	1564	1594.01	776.35	726.95	137.94	116.4	308.47	-2.13902	8.30091e-08	2.08372e-06	LOC104921625	TMS23229.1;XP_010732515.1	Keratin, type I cytoskeletal 13 [Larimichthys crocea];keratin, type I cytoskeletal 19 [Larimichthys crocea]	GO:0005882;GO:0005198	intermediate filament;structural molecule activity	K07604	KRT1	http://www.genome.jp/dbget-bin/www_bget?ko:K07604	Staphylococcus aureus infection;Estrogen signaling pathway	ko05150,ko04915	-	-	sp|Q5R8S9|K1C19_PONAB	Keratin, type I cytoskeletal 19 OS=Pongo abelii OX=9601 GN=KRT19 PE=2 SV=1
gene1363	4016	6.47	7.74	4.01	0.37	0.48	0.85	-3.11156	1.79655e-14	1.98712e-12	LOC104929534	KAE8280723.1	E3 ubiquitin-protein ligase NEURL1 [Larimichthys crocea]	GO:0046872	metal ion binding	K01931	NEUR	http://www.genome.jp/dbget-bin/www_bget?ko:K01931	-	-	KOG4625	Notch signaling protein Neuralized, Nuez domain	sp|O76050|NEUL1_HUMAN	E3 ubiquitin-protein ligase NEURL1 OS=Homo sapiens OX=9606 GN=NEURL1 PE=2 SV=1
gene22003	1148	54.12	51.28	27.85	12	5.33	24.69	-1.39587	0.00102713	0.00659962	LOC104938259	XP_010752924.2	calcium uniporter regulatory subunit MCUb, mitochondrial [Larimichthys crocea]	-	-	K22829	MCUB	http://www.genome.jp/dbget-bin/www_bget?ko:K22829	-	-	KOG2966	Uncharacterized conserved protein	sp|Q9NWR8|MCUB_HUMAN	Calcium uniporter regulatory subunit MCUb, mitochondrial OS=Homo sapiens OX=9606 GN=MCUB PE=1 SV=2
gene15716	3123	4.47	5.17	8.9	0.49	1.21	2.63	-1.84059	0.00111375	0.00705374	LOC104931575	XP_010744908.2	skin secretory protein xP2-like isoform X2 [Larimichthys crocea]	-	-	-	-	-	-	-	-	-	-	-
novel.14354	515	18.5	22.21	10.16	1.32	2.82	7.74	-1.78597	0.00373483	0.0191384	RNH1	XP_038590440.1	NLR family CARD domain-containing protein 3-like [Micropterus salmoides]	-	-	K22614	NLRC3,NOD3	http://www.genome.jp/dbget-bin/www_bget?ko:K22614	-	-	-	-	sp|P10775|RINI_PIG	Ribonuclease inhibitor OS=Sus scrofa OX=9823 GN=RNH1 PE=1 SV=1
novel.12397	810	7.32	14.93	21.57	1.43	1.56	0.73	-3.02897	8.18749e-06	0.000112198	-	-	-	-	-	-	-	-	-	-	-	-	-	-
gene5014	1990	5.25	9.78	3.99	0.99	0.79	1.5	-2.13077	3.5004e-06	5.42759e-05	cytip	KAE8299379.1	Cytohesin-interacting protein Cytohesin-binding protein HE [Larimichthys crocea]	-	-	-	-	-	-	-	KOG3528	FOG: PDZ domain	sp|Q5I0L6|CYTIP_RAT	Cytohesin-interacting protein OS=Rattus norvegicus OX=10116 GN=Cytip PE=2 SV=1
gene22025	2608	3.51	9.99	5.39	0.4	0.65	2.01	-2.37594	2.56178e-05	0.000297845	LOC104938281	XP_019132955.2;XP_019132951.2	endothelin-converting enzyme 2 isoform X2 [Larimichthys crocea];endothelin-converting enzyme 2 isoform X1 [Larimichthys crocea]	-	-	K01415	ECE	http://www.genome.jp/dbget-bin/www_bget?ko:K01415	-	-	KOG3624	M13 family peptidase	sp|F1N476|ECE2_BOVIN	Endothelin-converting enzyme 2 OS=Bos taurus OX=9913 GN=ECE2 PE=2 SV=1
gene13747	664	5.95	22.58	5.29	0.6	0.29	1.44	-3.6317	4.64997e-06	6.87807e-05	LOC104929470	XP_027146000.1	protein PLANT CADMIUM RESISTANCE 2-like [Larimichthys crocea]	-	-	-	-	-	-	-	-	-	sp|Q0VBW2|CNFN_BOVIN	Cornifelin OS=Bos taurus OX=9913 GN=CNFN PE=3 SV=1
gene21069	1063	4.06	5.11	1.83	0.78	0.6	0.42	-2.06464	0.00260932	0.014287	ung	XP_010751762.3	uracil-DNA glycosylase [Larimichthys crocea]	GO:0005739;GO:0006284;GO:0005634;GO:0004844	mitochondrion;base-excision repair;nucleus;uracil DNA N-glycosylase activity	K03648	UNG,UDG	http://www.genome.jp/dbget-bin/www_bget?ko:K03648	Base excision repair;Primary immunodeficiency	ko03410,ko05340	KOG2994	Uracil DNA glycosylase	sp|P13051|UNG_HUMAN	Uracil-DNA glycosylase OS=Homo sapiens OX=9606 GN=UNG PE=1 SV=2
novel.9873	1257	0.91	2.19	0.84	0.05	0.05	0.45	-2.62819	0.00761381	0.0338793	ART4	XP_035516490.1	T-cell ecto-ADP-ribosyltransferase 1-like [Morone saxatilis]	-	-	K06717	ART4,DO,CD297	http://www.genome.jp/dbget-bin/www_bget?ko:K06717	-	-	-	-	sp|Q93070|NAR4_HUMAN	Ecto-ADP-ribosyltransferase 4 OS=Homo sapiens OX=9606 GN=ART4 PE=2 SV=2
gene5503	1277	49.69	45.71	45.19	13.91	11.85	16.3	-1.30603	8.47043e-05	0.00081437	hmgn5	KAF5168063.1	hypothetical protein HST_G00071380 [Hippoglossus stenolepis]	GO:0031492;GO:0000785;GO:0005634	nucleosomal DNA binding;chromatin;nucleus	K11299	HMGN1	http://www.genome.jp/dbget-bin/www_bget?ko:K11299	-	-	-	-	-	-
gene17681	823	4	15.8	3.1	0.09	0.19	0.61	-4.18686	3.90827e-06	5.9662e-05	LOC104933653	TMS03675.1	Rho-related GTP-binding protein RhoF [Larimichthys crocea]	GO:0007264;GO:0005525;GO:0003924	small GTPase mediated signal transduction;GTP binding;GTPase activity	K07872	RHOF,RIF	http://www.genome.jp/dbget-bin/www_bget?ko:K07872	-	-	KOG0393	Ras-related small GTPase, Rho type	sp|Q9HBH0|RHOF_HUMAN;sp|Q3SZA1|RHOF_BOVIN	Rho-related GTP-binding protein RhoF OS=Homo sapiens OX=9606 GN=RHOF PE=1 SV=1;Rho-related GTP-binding protein RhoF OS=Bos taurus OX=9913 GN=RHOF PE=2 SV=1
gene1025	2876	10.25	17.57	5.66	0.6	0.4	1.12	-3.6298	1.57554e-14	1.76631e-12	LOC104925897	XP_010737942.3	myosin light chain kinase, smooth muscle isoform X1 [Larimichthys crocea]	GO:0004672;GO:0005886;GO:0005524;GO:0016021	protein kinase activity;plasma membrane;ATP binding;integral component of membrane	K00907	MYLK	http://www.genome.jp/dbget-bin/www_bget?ko:K00907	Regulation of actin cytoskeleton;Focal adhesion;Apelin signaling pathway;Calcium signaling pathway;cGMP-PKG signaling pathway;Vascular smooth muscle contraction;Gastric acid secretion;Oxytocin signaling pathway;Platelet activation	ko04810,ko04510,ko04371,ko04020,ko04022,ko04270,ko04971,ko04921,ko04611	KOG0613	Projectin/twitchin and related proteins	sp|Q28824|MYLK_BOVIN	Myosin light chain kinase, smooth muscle OS=Bos taurus OX=9913 GN=MYLK PE=1 SV=1
gene7267	1395	6.3	10.17	5.79	1.79	0.79	4.63	-1.40128	0.00527563	0.0252822	nrm	TKS88378.1	Nurim Nuclear envelope membrane protein [Collichthys lucidus]	GO:0016021;GO:0005637	integral component of membrane;nuclear inner membrane	-	-	-	-	-	-	-	sp|Q1L911|NRM_DANRE	Nurim OS=Danio rerio OX=7955 GN=nrm PE=3 SV=1
novel.8676	594	3.53	0.84	2.57	0	0	0	-5.82984	0.000531064	0.00379949	-	-	-	-	-	-	-	-	-	-	-	-	-	-
novel.16189	1648	2.5	1.84	1.21	0.34	0	0.37	-2.68287	0.000892398	0.00587253	FCGR2	KAE8279394.1	hypothetical protein D5F01_LYC22981 [Larimichthys crocea]	GO:0005886;GO:0016021	plasma membrane;integral component of membrane	K06727	FCRL,IRTA,CD307	http://www.genome.jp/dbget-bin/www_bget?ko:K06727	-	-	-	-	sp|Q28110|FCGR2_BOVIN	Low affinity immunoglobulin gamma Fc region receptor II OS=Bos taurus OX=9913 GN=FCGR2 PE=2 SV=1
gene14680	378	7.96	38.46	19.84	1.84	0.99	3.04	-3.11756	0.000242806	0.00196316	LOC104930464	XP_019130308.2	uncharacterized protein LOC104930464 [Larimichthys crocea]	GO:0016021;GO:0004888;GO:0007166;GO:0042101;GO:0002250	integral component of membrane;transmembrane signaling receptor activity;cell surface receptor signaling pathway;T cell receptor complex;adaptive immune response	K06450	CD3D	http://www.genome.jp/dbget-bin/www_bget?ko:K06450	PD-L1 expression and PD-1 checkpoint pathway in cancer;Primary immunodeficiency;Chagas disease;Epstein-Barr virus infection;Human T-cell leukemia virus 1 infection;Human immunodeficiency virus 1 infection;Measles;Hematopoietic cell lineage;T cell receptor signaling pathway;Th1 and Th2 cell differentiation;Th17 cell differentiation	ko05235,ko05340,ko05142,ko05169,ko05166,ko05170,ko05162,ko04640,ko04660,ko04658,ko04659	-	-	sp|P11942|CD3G_MOUSE	T-cell surface glycoprotein CD3 gamma chain OS=Mus musculus OX=10090 GN=Cd3g PE=1 SV=1
gene11066	2877	0.34	0.06	1.49	0	0.04	0	-5.02814	0.00130059	0.00805583	LOC104926602	XP_010738791.3	SLIT and NTRK-like protein 3 [Larimichthys crocea]	GO:0007409;GO:0016021;GO:1905606	axonogenesis;integral component of membrane;regulation of presynapse assembly	-	-	-	-	-	-	-	sp|O94933|SLIK3_HUMAN	SLIT and NTRK-like protein 3 OS=Homo sapiens OX=9606 GN=SLITRK3 PE=1 SV=2
gene12584	956	2.61	2.91	0.71	0.3	0.08	0.33	-2.75753	0.00327669	0.0171816	LOC104928229	TMS17513.1	Centromere protein U [Larimichthys crocea]	GO:0000775;GO:0005634;GO:0016874	chromosome, centromeric region;nucleus;ligase activity	K11513	MLF1IP,CENPU	http://www.genome.jp/dbget-bin/www_bget?ko:K11513	-	-	-	-	-	-
gene17730	1353	2.79	6.83	3.02	0.39	0.78	0.57	-2.35327	0.000282884	0.00224136	cbfb	XP_027128607.1	core-binding factor subunit beta isoform X1 [Larimichthys crocea]	GO:0030097;GO:0016513;GO:0003677;GO:0048769;GO:0030018;GO:0046982;GO:0060047;GO:0097535;GO:0003713;GO:0045214;GO:0005634	hemopoiesis;core-binding factor complex;DNA binding;sarcomerogenesis;Z disc;protein heterodimerization activity;heart contraction;lymphoid lineage cell migration into thymus;transcription coactivator activity;sarcomere organization;nucleus	-	-	-	-	-	-	-	sp|Q08024|PEBB_MOUSE	Core-binding factor subunit beta OS=Mus musculus OX=10090 GN=Cbfb PE=1 SV=1
gene17418	1210	101.25	149.4	60.72	21.71	9.4	24.55	-2.09348	5.44406e-07	1.07733e-05	LOC104933386	XP_010747119.3	proteasome subunit beta type-7 [Larimichthys crocea]	GO:0005839;GO:0005737;GO:0005634;GO:0004298;GO:0051603	proteasome core complex;cytoplasm;nucleus;threonine-type endopeptidase activity;proteolysis involved in cellular protein catabolic process	K02739	PSMB7	http://www.genome.jp/dbget-bin/www_bget?ko:K02739	Proteasome;Alzheimer disease;Amyotrophic lateral sclerosis;Huntington disease;Parkinson disease;Pathways of neurodegeneration - multiple diseases;Prion disease;Spinocerebellar ataxia	ko03050,ko05010,ko05014,ko05016,ko05012,ko05022,ko05020,ko05017	KOG0173	20S proteasome, regulatory subunit beta type PSMB7/PSMB10/PUP1	sp|P70195|PSB7_MOUSE	Proteasome subunit beta type-7 OS=Mus musculus OX=10090 GN=Psmb7 PE=1 SV=1
gene14078	3788	1.69	2.04	1.75	0.47	0.51	0.97	-1.13377	0.00520733	0.0250081	slc35f5	TKS67548.1	Solute carrier family 35 member F5 Hepatitis C virus NS5A-transactivated protein 3 [Collichthys lucidus]	GO:0016021	integral component of membrane	K15289	SLC35F5	http://www.genome.jp/dbget-bin/www_bget?ko:K15289	-	-	KOG2765	Predicted membrane protein	sp|Q8WV83|S35F5_HUMAN	Solute carrier family 35 member F5 OS=Homo sapiens OX=9606 GN=SLC35F5 PE=1 SV=1
gene8691	958	71.19	185.77	61.34	2.55	1.38	1.46	-5.36084	6.62893e-22	2.41527e-19	LOC104924058	KAE8278910.1	hypothetical protein D5F01_LYC22492 [Larimichthys crocea]	GO:0005576;GO:0007160;GO:0005509	extracellular region;cell-matrix adhesion;calcium ion binding	-	-	-	-	-	-	-	sp|P38528|EPD_CYPCA	Ependymin OS=Cyprinus carpio OX=7962 GN=epd PE=2 SV=1
gene14978	2544	13678	14163.9	4596.91	443.15	223.17	682.77	-4.23798	2.58999e-21	8.79035e-19	LOC104930769	XP_036961407.1;XP_010743947.3	keratin, type II cytoskeletal 8-like isoform X3 [Acanthopagrus latus];keratin, type II cytoskeletal cochleal [Larimichthys crocea]	GO:0045095	keratin filament	K07605	KRT2	http://www.genome.jp/dbget-bin/www_bget?ko:K07605	-	-	-	-	sp|Q6NWF6|K2C8_DANRE	Keratin, type II cytoskeletal 8 OS=Danio rerio OX=7955 GN=krt8 PE=1 SV=1
gene14252	5975	3.79	3.39	2.43	1.53	0.97	1.37	-1.3322	0.000196018	0.00164461	runx2	XP_010742958.1;KAE8287050.1	runt-related transcription factor 2 isoform X2 [Larimichthys crocea];Runt-related transcription factor 2 [Larimichthys crocea]	GO:0042809;GO:0045893;GO:0003677;GO:0005524;GO:0003700;GO:0009953;GO:0002062;GO:0005634	vitamin D receptor binding;positive regulation of transcription, DNA-templated;DNA binding;ATP binding;DNA-binding transcription factor activity;dorsal/ventral pattern formation;chondrocyte differentiation;nucleus	K09278	RUNX2,AML3	http://www.genome.jp/dbget-bin/www_bget?ko:K09278	Transcriptional misregulation in cancer;Parathyroid hormone synthesis, secretion and action	ko05202,ko04928	-	-	sp|Q13950|RUNX2_HUMAN	Runt-related transcription factor 2 OS=Homo sapiens OX=9606 GN=RUNX2 PE=1 SV=2
gene6976	4100	2.86	4.68	2.56	0.22	0.5	0.75	-2.38944	1.63355e-06	2.80477e-05	fam65b	KAE8281847.1;XP_027141994.1;XP_019126330.1	Rho family-interacting cell polarization regulator 2 [Larimichthys crocea];rho family-interacting cell polarization regulator 2 isoform X3 [Larimichthys crocea];rho family-interacting cell polarization regulator 2 isoform X2 [Larimichthys crocea]	GO:0009968;GO:0007605;GO:0006935;GO:0060171;GO:0007155;GO:0005856;GO:0016324;GO:0005737;GO:0048741;GO:0030175	negative regulation of signal transduction;sensory perception of sound;chemotaxis;stereocilium membrane;cell adhesion;cytoskeleton;apical plasma membrane;cytoplasm;skeletal muscle fiber development;filopodium	K24818	RIPOR,FAM65	http://www.genome.jp/dbget-bin/www_bget?ko:K24818	-	-	-	-	sp|Q1LU99|RIPR2_DANRE	Rho family-interacting cell polarization regulator 2 OS=Danio rerio OX=7955 GN=ripor2 PE=2 SV=1
gene19645	2241	0.75	1.94	1.12	0.08	0	0.06	-4.45609	3.34028e-06	5.22797e-05	LOC104935780	XP_010749974.1	SH2 domain-containing protein 1A [Larimichthys crocea]	-	-	K07990	SH2D1A,SAP	http://www.genome.jp/dbget-bin/www_bget?ko:K07990	Natural killer cell mediated cytotoxicity	ko04650	-	-	sp|Q06AA1|SH21A_PIG	SH2 domain-containing protein 1A OS=Sus scrofa OX=9823 GN=SH2D1A PE=2 SV=1
gene12125	1660	17.18	22.04	10.93	6.53	2.6	8.75	-1.1485	0.00555501	0.0263106	LOC104927736	XP_019127010.1;XP_019127012.1;XP_010740181.2;XP_010740182.2;XP_019127011.1	coatomer subunit zeta-1 isoform X4 [Larimichthys crocea];coatomer subunit zeta-1 isoform X6 [Larimichthys crocea];coatomer subunit zeta-1 isoform X1 [Larimichthys crocea];coatomer subunit zeta-1 isoform X2 [Larimichthys crocea];coatomer subunit zeta-1 isoform X5 [Larimichthys crocea]	GO:0000139;GO:0015031;GO:0030126;GO:0006890	Golgi membrane;protein transport;COPI vesicle coat;retrograde vesicle-mediated transport, Golgi to endoplasmic reticulum	K20472	COPZ,RET3	http://www.genome.jp/dbget-bin/www_bget?ko:K20472	-	-	KOG3343	Vesicle coat complex COPI, zeta subunit	sp|Q9P299|COPZ2_HUMAN;sp|P35604|COPZ1_BOVIN	Coatomer subunit zeta-2 OS=Homo sapiens OX=9606 GN=COPZ2 PE=2 SV=1;Coatomer subunit zeta-1 OS=Bos taurus OX=9913 GN=COPZ1 PE=1 SV=2
gene17210	4221	2.55	8.37	6.2	0.12	0.16	0.16	-4.85992	1.96034e-16	3.44464e-14	bnc1	XP_010746839.1	zinc finger protein basonuclin-1 [Larimichthys crocea]	-	-	K24146	BNC	http://www.genome.jp/dbget-bin/www_bget?ko:K24146	-	-	-	-	sp|Q01954|BNC1_HUMAN	Zinc finger protein basonuclin-1 OS=Homo sapiens OX=9606 GN=BNC1 PE=1 SV=2
gene17252	4575	0.39	4.14	1.88	0.06	0.16	0.04	-3.98041	8.52164e-06	0.000115943	LOC104933201	XP_027142360.1	collagen alpha-1(XIV) chain-like isoform X2 [Larimichthys crocea]	-	-	K08133	COL14A	http://www.genome.jp/dbget-bin/www_bget?ko:K08133	Protein digestion and absorption	ko04974	-	-	sp|P32018|COEA1_CHICK	Collagen alpha-1(XIV) chain OS=Gallus gallus OX=9031 GN=COL14A1 PE=1 SV=2
gene2925	4834	7.88	10.85	4.81	2.18	1.91	4.6	-1.13498	0.00217953	0.0123344	LOC104917814	TMS08551.1;KAE8284799.1	Cingulin-like protein 1, partial [Larimichthys crocea];hypothetical protein D5F01_LYC16234 [Larimichthys crocea]	GO:0016459	myosin complex	-	-	-	-	-	-	-	-	-
gene18984	1959	64.4	63.14	42.02	11.89	13.39	28.38	-1.3087	7.18776e-05	0.000712621	prps2	XP_010749148.1	ribose-phosphate pyrophosphokinase 2 isoform X1 [Larimichthys crocea]	GO:0016301;GO:0009116;GO:0000287;GO:0009165;GO:0004749	kinase activity;nucleoside metabolic process;magnesium ion binding;nucleotide biosynthetic process;ribose phosphate diphosphokinase activity	K00948	PRPS,prsA	http://www.genome.jp/dbget-bin/www_bget?ko:K00948	Pentose phosphate pathway;Purine metabolism	ko00030,ko00230	KOG1448	Ribose-phosphate pyrophosphokinase	sp|P11908|PRPS2_HUMAN	Ribose-phosphate pyrophosphokinase 2 OS=Homo sapiens OX=9606 GN=PRPS2 PE=1 SV=2
gene8682	3806	14.91	33.14	11.56	1.82	1.52	3.93	-2.74255	9.45449e-10	3.85872e-08	LOC104924050	XP_010735578.3	interleukin-13 receptor subunit alpha-1-like [Larimichthys crocea]	GO:0016021	integral component of membrane	K05076	IL13RA1,CD213A1	http://www.genome.jp/dbget-bin/www_bget?ko:K05076	JAK-STAT signaling pathway;Cytokine-cytokine receptor interaction;Pathways in cancer	ko04630,ko04060,ko05200	-	-	sp|O09030|I13R1_MOUSE	Interleukin-13 receptor subunit alpha-1 OS=Mus musculus OX=10090 GN=Il13ra1 PE=2 SV=1
gene11302	1882	1.03	4.75	1.85	0.19	0.65	0.63	-1.89009	0.0115592	0.0474155	LOC104926859	KAE8300447.1	Mesothelin Pre-pro-megakaryocyte-potentiating factor [Larimichthys crocea]	GO:0016020	membrane	K20733	MSLN	http://www.genome.jp/dbget-bin/www_bget?ko:K20733	-	-	-	-	-	-
gene11898	3211	28.23	55.01	29.85	7.32	11.73	19.03	-1.19289	0.00484762	0.0235777	actn4	XP_027135696.1;XP_027135699.1;XP_027135698.1;KAE8294925.1;XP_027135697.1	alpha-actinin-4 isoform X3 [Larimichthys crocea];alpha-actinin-4 isoform X6 [Larimichthys crocea];alpha-actinin-4 isoform X5 [Larimichthys crocea];Alpha-actinin-4 [Larimichthys crocea];alpha-actinin-4 isoform X4 [Larimichthys crocea]	GO:0003779;GO:0005509	actin binding;calcium ion binding	K05699	ACTN1_4	http://www.genome.jp/dbget-bin/www_bget?ko:K05699	Regulation of actin cytoskeleton;Adherens junction;Focal adhesion;Tight junction;Viral carcinogenesis;Systemic lupus erythematosus;Shigellosis;Amoebiasis;Leukocyte transendothelial migration	ko04810,ko04520,ko04510,ko04530,ko05203,ko05322,ko05131,ko05146,ko04670	KOG0035	Ca2+-binding actin-bundling protein (actinin), alpha chain (EF-Hand protein superfamily)	sp|O43707|ACTN4_HUMAN;sp|P57780|ACTN4_MOUSE	Alpha-actinin-4 OS=Homo sapiens OX=9606 GN=ACTN4 PE=1 SV=2;Alpha-actinin-4 OS=Mus musculus OX=10090 GN=Actn4 PE=1 SV=1
gene1263	2203	0.58	1.41	0.51	0.03	0.06	0.12	-3.21543	0.000756641	0.00513182	LOC104928571	XP_010741184.2	zinc finger protein Helios isoform X1 [Larimichthys crocea]	-	-	K09220	IKZF,ZNFN1A	http://www.genome.jp/dbget-bin/www_bget?ko:K09220	-	-	-	-	sp|Q9UKS7|IKZF2_HUMAN	Zinc finger protein Helios OS=Homo sapiens OX=9606 GN=IKZF2 PE=1 SV=2
novel.18576	314	55.39	198.3	30.58	22.48	7.18	21.51	-2.0221	0.00776005	0.0343879	-	TKS79251.1	repeat-containing protein WDC146 [Collichthys lucidus]	GO:0005634	nucleus	-	-	-	-	-	-	-	-	-
gene14526	2721	42.07	42.16	12.08	1.86	0.74	5.86	-3.30559	3.17959e-08	8.78232e-07	LOC104930287	XP_019134727.2	serine/threonine-protein kinase Nek8 [Larimichthys crocea]	GO:0004672;GO:0005524	protein kinase activity;ATP binding	K08829	MAK	http://www.genome.jp/dbget-bin/www_bget?ko:K08829	-	-	-	-	sp|Q23915|KINX_DICDI	Probable serine/threonine-protein kinase kinX OS=Dictyostelium discoideum OX=44689 GN=kinX PE=3 SV=2
gene14731	1498	0.48	1.76	1.24	0.08	0.04	0.14	-3.39567	0.000677523	0.00466935	LOC104930517	XP_019134725.1	phosphatidylinositol 4-phosphate 5-kinase type-1 gamma isoform X2 [Larimichthys crocea]	GO:0016307;GO:0005524	phosphatidylinositol phosphate kinase activity;ATP binding	K00889	PIP5K	http://www.genome.jp/dbget-bin/www_bget?ko:K00889	Regulation of actin cytoskeleton;Focal adhesion;Endocytosis;Phosphatidylinositol signaling system;Phospholipase D signaling pathway;Choline metabolism in cancer;Yersinia infection;Inositol phosphate metabolism;Fc gamma R-mediated phagocytosis	ko04810,ko04510,ko04144,ko04070,ko04072,ko05231,ko05135,ko00562,ko04666	KOG0229	Phosphatidylinositol-4-phosphate 5-kinase	sp|O70161|PI51C_MOUSE	Phosphatidylinositol 4-phosphate 5-kinase type-1 gamma OS=Mus musculus OX=10090 GN=Pip5k1c PE=1 SV=2
gene12835	1368	64.16	87.85	59.48	3.2	3.54	13.32	-3.1739	1.84023e-13	1.664e-11	LOC104928494	XP_019119281.2	protein TsetseEP [Larimichthys crocea]	-	-	-	-	-	-	-	-	-	-	-
gene19056	4717	0.6	0.53	0.53	0.07	0.04	0.16	-2.35615	0.000234287	0.00190881	garnl3	XP_027137829.1	GTPase-activating Rap/Ran-GAP domain-like protein 3 isoform X3 [Larimichthys crocea]	GO:0005096;GO:0051056;GO:0043547	GTPase activator activity;regulation of small GTPase mediated signal transduction;positive regulation of GTPase activity	-	-	-	-	-	KOG3686	Rap1-GTPase-activating protein (Rap1GAP)	sp|A5PF44|GARL3_DANRE	GTPase-activating Rap/Ran-GAP domain-like protein 3 OS=Danio rerio OX=7955 GN=garnl3 PE=3 SV=1
gene4848	5718	0.65	0.44	0.57	0.11	0.09	0.24	-1.62445	0.00287173	0.0154439	LOC104919938	XP_019129423.1	plexin-A2 [Larimichthys crocea]	-	-	K06820	PLXNA	http://www.genome.jp/dbget-bin/www_bget?ko:K06820	Axon guidance	ko04360	KOG3610	Plexins (functional semaphorin receptors)	sp|O75051|PLXA2_HUMAN	Plexin-A2 OS=Homo sapiens OX=9606 GN=PLXNA2 PE=1 SV=4
gene5558	4310	0.48	1.89	1.05	0.32	0.18	0.28	-1.70035	0.00701739	0.0317729	LOC104920679	XP_027133699.1	protein patched homolog 1 [Larimichthys crocea]	-	-	K06225	PTCH1	http://www.genome.jp/dbget-bin/www_bget?ko:K06225	Hedgehog signaling pathway;Hedgehog signaling pathway - fly;cAMP signaling pathway;Pathways in cancer;Proteoglycans in cancer;Basal cell carcinoma;Axon guidance	ko04340,ko04341,ko04024,ko05200,ko05205,ko05217,ko04360	KOG1935	Membrane protein Patched/PTCH	sp|Q61115|PTC1_MOUSE	Protein patched homolog 1 OS=Mus musculus OX=10090 GN=Ptch1 PE=1 SV=1
gene13846	4428	5.88	8.6	5.57	0.19	0.55	0.55	-3.49292	8.0523e-12	5.18192e-10	plxdc2	XP_010742433.1;TMS09034.1	plexin domain-containing protein 2 [Larimichthys crocea];Plexin domain-containing protein 2, partial [Larimichthys crocea]	GO:0016021	integral component of membrane	-	-	-	-	-	KOG3848	Extracellular protein TEM7, contains PSI domain (tumor endothelial marker in humans)	sp|Q6UX71|PXDC2_HUMAN	Plexin domain-containing protein 2 OS=Homo sapiens OX=9606 GN=PLXDC2 PE=1 SV=1
gene10389	4326	39.45	58.86	20.36	2.7	2.06	4.83	-3.23251	2.86328e-15	3.92092e-13	sdpr	XP_010737905.3	caveolae-associated protein 2 [Larimichthys crocea]	GO:0005901	caveola	-	-	-	-	-	-	-	sp|O95810|CAVN2_HUMAN	Caveolae-associated protein 2 OS=Homo sapiens OX=9606 GN=CAVIN2 PE=1 SV=3
gene15633	258	400.06	531.95	24.54	41.17	36.6	16.39	-4.16862	2.39347e-10	1.11888e-08	LOC104931477	TKS66490.1	hypothetical protein D9C73_000546 [Collichthys lucidus]	GO:0016021	integral component of membrane	-	-	-	-	-	-	-	-	-
gene20459	1065	10.36	16.24	7.58	2.53	2.05	7.04	-1.26996	0.00546076	0.0259635	arpin	KAE8295825.1	Arpin [Larimichthys crocea]	GO:0030027;GO:0051126	lamellipodium;negative regulation of actin nucleation	-	-	-	-	-	-	-	sp|Q1LWJ6|ARPIN_DANRE	Arpin OS=Danio rerio OX=7955 GN=arpin PE=2 SV=1
gene13508	2002	12.85	11.13	6.22	0.09	0.06	0.49	-5.29718	1.39966e-18	3.50283e-16	LOC104929214	TMS21921.1;XP_027145271.1	Urokinase-type plasminogen activator [Larimichthys crocea];tissue-type plasminogen activator [Larimichthys crocea]	GO:0031639;GO:0004252;GO:0016301;GO:0016021;GO:0005615	plasminogen activation;serine-type endopeptidase activity;kinase activity;integral component of membrane;extracellular space	K01348	PLAU	http://www.genome.jp/dbget-bin/www_bget?ko:K01348	NF-kappa B signaling pathway;MicroRNAs in cancer;Proteoglycans in cancer;Transcriptional misregulation in cancer;Prostate cancer;Complement and coagulation cascades	ko04064,ko05206,ko05205,ko05202,ko05215,ko04610	-	-	sp|P15120|UROK_CHICK;sp|Q05589|UROK_BOVIN	Urokinase-type plasminogen activator OS=Gallus gallus OX=9031 GN=PLAU PE=2 SV=1;Urokinase-type plasminogen activator OS=Bos taurus OX=9913 GN=PLAU PE=2 SV=1
gene22761	2291	14.64	15.58	10.31	3.05	3.27	8.18	-1.16612	0.00100049	0.00645691	atg16l2	XP_027136575.1	autophagy-related protein 16-2 [Larimichthys crocea]	-	-	K20868	ATG16L2	http://www.genome.jp/dbget-bin/www_bget?ko:K20868	Autophagy - animal	ko04140	KOG0288	WD40 repeat protein TipD	sp|Q5I0B9|ATG16_XENTR	Autophagy-related protein 16 OS=Xenopus tropicalis OX=8364 GN=atg16 PE=2 SV=2
novel.17948	2696	2.59	2.29	0.57	0.06	0.04	0.05	-4.6732	4.88932e-08	1.28596e-06	KIAA1586	XP_027132754.1	E3 SUMO-protein ligase KIAA1586-like [Larimichthys crocea]	-	-	-	-	-	-	-	-	-	sp|Q9HCI6|K1586_HUMAN	E3 SUMO-protein ligase KIAA1586 OS=Homo sapiens OX=9606 GN=KIAA1586 PE=1 SV=2
novel.19082	2588	4.5	2.11	1.31	0.22	0.21	0.49	-2.79193	4.18607e-06	6.29333e-05	-	TKS91132.1	hypothetical protein D9C73_025266 [Collichthys lucidus]	-	-	-	-	-	-	-	-	-	-	-
gene11497	2969	1.91	0.8	1.08	0.35	0.14	0.48	-1.66081	0.0056862	0.0267428	cdx1	XP_010739348.2	homeobox protein CHOX-CAD [Larimichthys crocea]	GO:0000981;GO:0003677;GO:0005634;GO:0007275	DNA-binding transcription factor activity, RNA polymerase II-specific;DNA binding;nucleus;multicellular organism development	K09312	CDX1_4	http://www.genome.jp/dbget-bin/www_bget?ko:K09312	-	-	KOG0848	Transcription factor Caudal, contains HOX domain	sp|Q9DEB6|CDX1_CHICK	Homeobox protein CDX-1 OS=Gallus gallus OX=9031 GN=CDX1 PE=2 SV=2
gene4893	1612	18.62	22.9	8.57	1.66	3.09	6.47	-1.80465	0.000280095	0.00222282	LOC104919932	XP_010730365.2	tubulin alpha-8 chain [Larimichthys crocea]	GO:0005200;GO:0005525;GO:0007017;GO:0005737;GO:0005874;GO:0003924	structural constituent of cytoskeleton;GTP binding;microtubule-based process;cytoplasm;microtubule;GTPase activity	K07374	TUBA	http://www.genome.jp/dbget-bin/www_bget?ko:K07374	Apoptosis;Gap junction;Tight junction;Phagosome;Pathogenic Escherichia coli infection;Salmonella infection;Alzheimer disease;Amyotrophic lateral sclerosis;Huntington disease;Parkinson disease;Pathways of neurodegeneration - multiple diseases;Prion disease	ko04210,ko04540,ko04530,ko04145,ko05130,ko05132,ko05010,ko05014,ko05016,ko05012,ko05022,ko05020	KOG1376	Alpha tubulin	sp|P08537|TBA_XENLA	Tubulin alpha chain OS=Xenopus laevis OX=8355 GN=tuba PE=2 SV=2
gene7904	2620	5.79	7.06	5.48	1.32	0.84	3.46	-1.47042	0.000326552	0.00253626	LOC104923194	KAE8286084.1;XP_010734525.2	SLAIN motif-containing protein-like [Larimichthys crocea];SLAIN motif-containing protein-like [Larimichthys crocea]	GO:0016021	integral component of membrane	K16580	SLAIN1_2	http://www.genome.jp/dbget-bin/www_bget?ko:K16580	-	-	-	-	sp|Q7SXC6|SLAIL_DANRE	SLAIN motif-containing protein-like OS=Danio rerio OX=7955 GN=zgc:66447 PE=2 SV=1
gene15912	2626	26.37	1.65	6.1	0.25	0.85	3.33	-2.77132	0.00180649	0.0105935	dgat2	ATG31150.1	diacylglycerol O-acyltransferase 2 [Larimichthys crocea]	GO:0016747;GO:0005789;GO:0016021	acyltransferase activity, transferring groups other than amino-acyl groups;endoplasmic reticulum membrane;integral component of membrane	K11160	DGAT2	http://www.genome.jp/dbget-bin/www_bget?ko:K11160	Glycerolipid metabolism;Fat digestion and absorption	ko00561,ko04975	-	-	sp|Q4V9F0|DGAT2_DANRE	Diacylglycerol O-acyltransferase 2 OS=Danio rerio OX=7955 GN=dgat2 PE=2 SV=1
gene10564	1479	0.64	0.8	0.52	0.04	0	0.05	-4.11016	0.00297533	0.0159044	mos	XP_010738134.1	proto-oncogene serine/threonine-protein kinase mos [Larimichthys crocea]	GO:0005524;GO:0004674	ATP binding;protein serine/threonine kinase activity	K04367	MOS	http://www.genome.jp/dbget-bin/www_bget?ko:K04367	Oocyte meiosis;Regulation of actin cytoskeleton;Progesterone-mediated oocyte maturation	ko04114,ko04810,ko04914	-	-	sp|P12965|MOS_XENLA	Serine/threonine-protein kinase mos OS=Xenopus laevis OX=8355 GN=mos PE=2 SV=1
gene5528	2002	21.04	42.65	15.08	3.83	2.15	6.83	-2.28122	2.95885e-07	6.39691e-06	vsig10	XP_019127550.2;XP_019127549.2;TMS04114.1	V-set and immunoglobulin domain-containing protein 10 isoform X2 [Larimichthys crocea];V-set and immunoglobulin domain-containing protein 10 isoform X1 [Larimichthys crocea];V-set and immunoglobulin domain-containing protein 10 [Larimichthys crocea]	-	-	-	-	-	-	-	-	-	sp|B0CLX4|VSI10_DANRE	V-set and immunoglobulin domain-containing protein 10 OS=Danio rerio OX=7955 GN=vsig10 PE=2 SV=1
gene7270	2781	22.25	21.19	23.32	6.85	6.81	5.4	-1.28979	0.00310226	0.0164199	LOC104922513	XP_010733652.2	carnitine O-acetyltransferase [Larimichthys crocea]	GO:0016746	acyltransferase activity	K00624	E2.3.1.7	http://www.genome.jp/dbget-bin/www_bget?ko:K00624	Peroxisome	ko04146	KOG3717	Carnitine O-acyltransferase CRAT	sp|P52826|CACP_COLLI	Carnitine O-acetyltransferase OS=Columba livia OX=8932 GN=CRAT PE=1 SV=1
gene343	2668	19.48	28.07	18.02	6.07	4.93	14.43	-1.07961	0.00172585	0.0101736	macrod2	XP_010728227.2;XP_019121802.1;TMS04410.1;XP_010728235.2	O-acetyl-ADP-ribose deacetylase MACROD2 isoform X4 [Larimichthys crocea];O-acetyl-ADP-ribose deacetylase MACROD2 isoform X2 [Larimichthys crocea];hypothetical protein E3U43_009567 [Larimichthys crocea];O-acetyl-ADP-ribose deacetylase MACROD2 isoform X5 [Larimichthys crocea]	-	-	K23518	MACROD,ymdB	http://www.genome.jp/dbget-bin/www_bget?ko:K23518	-	-	KOG2633	Hismacro and SEC14 domain-containing proteins	sp|A1Z1Q3|MACD2_HUMAN;sp|Q3UYG8|MACD2_MOUSE	ADP-ribose glycohydrolase MACROD2 OS=Homo sapiens OX=9606 GN=MACROD2 PE=1 SV=2;ADP-ribose glycohydrolase MACROD2 OS=Mus musculus OX=10090 GN=Macrod2 PE=1 SV=1
gene3520	2105	9.72	8.81	6.83	1.61	2.97	2.54	-1.31819	0.0048113	0.0234424	faah	TMS20598.1	Fatty-acid amide hydrolase 1 [Larimichthys crocea]	GO:0016787	hydrolase activity	K15528	FAAH	http://www.genome.jp/dbget-bin/www_bget?ko:K15528	Axon regeneration;Retrograde endocannabinoid signaling	ko04361,ko04723	KOG1212	Amidases	sp|P97612|FAAH1_RAT	Fatty-acid amide hydrolase 1 OS=Rattus norvegicus OX=10116 GN=Faah PE=1 SV=1
gene18792	2539	45.7	51.56	20.87	8.17	3.93	16.95	-1.74463	6.65363e-05	0.000668312	smim14	XP_010748916.1	small integral membrane protein 14 [Larimichthys crocea]	GO:0016021	integral component of membrane	-	-	-	-	-	-	-	sp|Q2KIK3|SIM14_BOVIN	Small integral membrane protein 14 OS=Bos taurus OX=9913 GN=SMIM14 PE=3 SV=1
gene9577	992	11.33	10.33	2.4	1.07	0.87	1.24	-2.43889	0.000134893	0.00120797	mad2l1	XP_010736823.1	mitotic spindle assembly checkpoint protein MAD2A [Larimichthys crocea]	-	-	K02537	MAD2	http://www.genome.jp/dbget-bin/www_bget?ko:K02537	Cell cycle;Oocyte meiosis;Human T-cell leukemia virus 1 infection;Progesterone-mediated oocyte maturation	ko04110,ko04114,ko05166,ko04914	KOG3285	Spindle assembly checkpoint protein	sp|Q13257|MD2L1_HUMAN	Mitotic spindle assembly checkpoint protein MAD2A OS=Homo sapiens OX=9606 GN=MAD2L1 PE=1 SV=1
gene5069	4710	2.43	2.38	1.71	0.31	0.59	1.29	-1.26112	0.00760785	0.0338768	pde2a	XP_027135966.1;XP_019110289.1	cGMP-dependent 3&apos;,5&apos;-cyclic phosphodiesterase isoform X1 [Larimichthys crocea];cGMP-dependent 3&apos;,5&apos;-cyclic phosphodiesterase isoform X2 [Larimichthys crocea]	-	-	K18283	PDE2A	http://www.genome.jp/dbget-bin/www_bget?ko:K18283	cGMP-PKG signaling pathway;Morphine addiction;Purine metabolism;Aldosterone synthesis and secretion;Olfactory transduction	ko04022,ko05032,ko00230,ko04925,ko04740	KOG3689	Cyclic nucleotide phosphodiesterase	sp|Q922S4|PDE2A_MOUSE	cGMP-dependent 3&apos;,5&apos;-cyclic phosphodiesterase OS=Mus musculus OX=10090 GN=Pde2a PE=1 SV=4
gene17755	4586	4.32	7.36	3.99	0.77	0.54	1.38	-2.18251	4.61066e-07	9.3711e-06	LOC104933733	KAE8293016.1	RBBP8 N-terminal-like protein [Larimichthys crocea]	-	-	-	-	-	-	-	-	-	sp|Q8NC74|RB8NL_HUMAN	RBBP8 N-terminal-like protein OS=Homo sapiens OX=9606 GN=RBBP8NL PE=1 SV=3
novel.11717	2244	4.67	16.24	4.28	1.65	0.32	1.76	-2.41111	0.000210691	0.0017523	-	TMS07184.1	Usherin, partial [Larimichthys crocea]	-	-	-	-	-	-	-	-	-	-	-
gene1258	1888	7.09	7.73	4.19	0.77	1.43	2.46	-1.65026	0.000415881	0.00310545	tmem38b	KAE8285000.1	Trimeric intracellular cation channel type B [Larimichthys crocea]	GO:0005267;GO:0042802;GO:0016021	potassium channel activity;identical protein binding;integral component of membrane	K24013	TMEM38,TRIC	http://www.genome.jp/dbget-bin/www_bget?ko:K24013	-	-	-	-	sp|Q7ZVP8|TM38B_DANRE	Trimeric intracellular cation channel type B OS=Danio rerio OX=7955 GN=tmem38b PE=2 SV=1
gene15321	3759	3.15	3.73	2.56	0.59	0.32	1.14	-1.90811	2.2483e-06	3.71855e-05	LOC104931148	XP_010744388.2;XP_010744389.2	dynamin-1-like protein isoform X1 [Larimichthys crocea];dynamin-1-like protein isoform X2 [Larimichthys crocea]	GO:0005525;GO:0005737;GO:0003924	GTP binding;cytoplasm;GTPase activity	K17065	DNM1L	http://www.genome.jp/dbget-bin/www_bget?ko:K17065	Apoptosis - fly;Necroptosis;TNF signaling pathway;NOD-like receptor signaling pathway	ko04214,ko04217,ko04668,ko04621	KOG0446	Vacuolar sorting protein VPS1, dynamin, and related proteins	sp|Q7SXN5|DNM1L_DANRE	Dynamin-1-like protein OS=Danio rerio OX=7955 GN=dnm1l PE=2 SV=1
novel.21723	612	13.21	15.72	4.67	0.6	0.31	0.65	-3.99226	1.61731e-07	3.74142e-06	-	XP_027140788.1	LOW QUALITY PROTEIN: NACHT, LRR and PYD domains-containing protein 12 [Larimichthys crocea]	-	-	-	-	-	-	-	-	-	sp|A0ZSK4|STXB_SYNVE	Neoverrucotoxin subunit beta OS=Synanceia verrucosa OX=51996 PE=1 SV=1
novel.9104	3168	20.81	14.42	13.66	4.52	3.2	7.89	-1.3157	5.49434e-05	0.000566962	-	KAE8286744.1	Dihydropyrimidinase-related protein 5 [Larimichthys crocea]	GO:0007411;GO:0008017;GO:0005737;GO:0016810	axon guidance;microtubule binding;cytoplasm;hydrolase activity, acting on carbon-nitrogen (but not peptide) bonds	-	-	-	-	-	-	-	-	-
novel.20302	3782	0.81	5.79	0.41	0	0.19	0.16	-3.7478	0.000473888	0.0034563	-	KAE8278092.1	hypothetical protein D5F01_LYC23849 [Larimichthys crocea]	GO:0005887;GO:0006644;GO:0007409;GO:0042577;GO:0046839;GO:0005524	integral component of plasma membrane;phospholipid metabolic process;axonogenesis;lipid phosphatase activity;phospholipid dephosphorylation;ATP binding	-	-	-	-	-	-	-	-	-
gene11128	4707	0.28	0.05	0.78	0.02	0.01	0.11	-2.84046	0.0116181	0.0475394	mast1	XP_027139141.1	microtubule-associated serine/threonine-protein kinase 1 isoform X1 [Larimichthys crocea]	-	-	K08789	MAST	http://www.genome.jp/dbget-bin/www_bget?ko:K08789	-	-	KOG0606	Microtubule-associated serine/threonine kinase and related proteins	sp|Q9R1L5|MAST1_MOUSE	Microtubule-associated serine/threonine-protein kinase 1 OS=Mus musculus OX=10090 GN=Mast1 PE=1 SV=3
gene6324	3124	4.58	8.85	3.06	1.42	0.79	1.81	-1.64274	0.000407211	0.00304622	LOC104921489	XP_019131102.2	kelch-like protein 9 [Larimichthys crocea]	-	-	K10447	KLHL9_13	http://www.genome.jp/dbget-bin/www_bget?ko:K10447	Ubiquitin mediated proteolysis	ko04120	-	-	sp|A6QQY2|KLH13_BOVIN	Kelch-like protein 13 OS=Bos taurus OX=9913 GN=KLHL13 PE=2 SV=1
gene4805	1410	3.6	9.37	4.25	0.14	0.55	0.39	-3.48321	4.63931e-07	9.41388e-06	LOC104919854	KAE8295060.1	hypothetical protein D5F01_LYC05983 [Larimichthys crocea]	GO:0016021;GO:0005886	integral component of membrane;plasma membrane	-	-	-	-	-	-	-	-	-
gene15932	2144	3.75	3.05	2.4	0.12	0.17	0	-4.90723	2.88393e-10	1.33058e-08	LOC104931810	XP_019108951.1;TMS18155.1	solute carrier family 22 member 13 [Larimichthys crocea];Solute carrier family 22 member 13 [Larimichthys crocea]	GO:0022857;GO:0016021	transmembrane transporter activity;integral component of membrane	K08209	SLC22A13	http://www.genome.jp/dbget-bin/www_bget?ko:K08209	-	-	KOG0255	Synaptic vesicle transporter SVOP and related transporters (major facilitator superfamily)	sp|Q9Y226|S22AD_HUMAN;sp|Q66J54|S226A_XENLA	Solute carrier family 22 member 13 OS=Homo sapiens OX=9606 GN=SLC22A13 PE=2 SV=2;Solute carrier family 22 member 6-A OS=Xenopus laevis OX=8355 GN=slc22a6-a PE=2 SV=1
gene13433	16198	0.03	0.28	0.03	0	0	0	-7.0161	1.90933e-05	0.000232232	hydin	XP_027128847.1	hydrocephalus-inducing protein homolog isoform X4 [Larimichthys crocea]	-	-	K17570	HYDIN	http://www.genome.jp/dbget-bin/www_bget?ko:K17570	-	-	-	-	sp|Q4G0P3|HYDIN_HUMAN	Hydrocephalus-inducing protein homolog OS=Homo sapiens OX=9606 GN=HYDIN PE=1 SV=3
gene4842	2686	11.6	2.83	6.19	0.19	0.81	0.7	-3.1477	3.92864e-06	5.98622e-05	tnmd	XP_010730297.1;XP_019116204.1	tenomodulin isoform X2 [Larimichthys crocea];tenomodulin isoform X1 [Larimichthys crocea]	GO:0016021	integral component of membrane	-	-	-	-	-	-	-	sp|Q9EP64|TNMD_MOUSE	Tenomodulin OS=Mus musculus OX=10090 GN=Tnmd PE=2 SV=1
gene15843	3992	3.33	7.06	3.5	0.6	0.62	1.61	-1.98019	9.8657e-06	0.000131628	LOC104931723	TKS81536.1	Adenylate cyclase type 3 [Collichthys lucidus]	GO:0005524;GO:0016021;GO:0035556;GO:0006171;GO:0005886;GO:0004016;GO:0046872	ATP binding;integral component of membrane;intracellular signal transduction;cAMP biosynthetic process;plasma membrane;adenylate cyclase activity;metal ion binding	K08043	ADCY3	http://www.genome.jp/dbget-bin/www_bget?ko:K08043	Oocyte meiosis;Gap junction;Apelin signaling pathway;Calcium signaling pathway;Phospholipase D signaling pathway;Rap1 signaling pathway;cAMP signaling pathway;cGMP-PKG signaling pathway;Chemical carcinogenesis - receptor activation;Pathways in cancer;Dilated cardiomyopathy;Endocrine resistance;Cushing syndrome;Vibrio cholerae infection;Human T-cell leukemia virus 1 infection;Human cytomegalovirus…	ko04114,ko04540,ko04371,ko04020,ko04072,ko04015,ko04024,ko04022,ko05207,ko05200,ko05414,ko01522,ko04934,ko05110,ko05166,ko05163,ko05032,ko00230,ko04211,ko04213,ko04261,ko04270,ko04976,ko04971,ko04972,ko04970,ko04925,ko04927,ko04915,ko04912,ko04935,ko04911,ko04916,ko04913,ko04921,ko04928,ko04914,ko04923,ko04926,ko04918,ko04713,ko04714,ko04962,ko04062,ko04611,ko04725,ko04727,ko04724,ko04723,ko04750…	-	-	sp|Q8VHH7|ADCY3_MOUSE	Adenylate cyclase type 3 OS=Mus musculus OX=10090 GN=Adcy3 PE=1 SV=2
gene764	2069	24.94	26.27	20.09	2.23	0.44	1.53	-3.70743	2.48449e-13	2.2063e-11	LOC104922881	XP_019129489.2;TKS69247.1;TKS69240.1	uncharacterized protein LOC104922881 isoform X3 [Larimichthys crocea];Protein MGARP [Collichthys lucidus];Protein MGARP [Collichthys lucidus]	GO:0008089;GO:1904115;GO:0005739;GO:0016021	anterograde axonal transport;axon cytoplasm;mitochondrion;integral component of membrane	-	-	-	-	-	-	-	-	-
gene1367	7330	12.89	34.2	17.21	1.56	1.94	3.43	-2.8337	1.11147e-10	5.63147e-09	LOC104929776	XP_019125936.2;XP_027133571.1	collagen alpha-1(XVII) chain-like isoform X1 [Larimichthys crocea];collagen alpha-1(XVII) chain-like isoform X2 [Larimichthys crocea]	GO:0005581;GO:0016021	collagen trimer;integral component of membrane	K07603	COL17A,BP180	http://www.genome.jp/dbget-bin/www_bget?ko:K07603	Protein digestion and absorption	ko04974	-	-	sp|Q90584|COHA1_CHICK	Collagen alpha-1(XVII) chain OS=Gallus gallus OX=9031 GN=COL17A1 PE=2 SV=2
gene10522	578	4.54	2.08	1.59	0.33	0.13	0.18	-5.08951	7.03392e-05	0.000699609	LOC104926040	XP_019115860.1	phospholipid phosphatase 6 [Larimichthys crocea]	GO:0106294;GO:0004499;GO:0050660;GO:0005789;GO:0050661;GO:0016021	NADPH oxidase H202-forming activity;N,N-dimethylaniline monooxygenase activity;flavin adenine dinucleotide binding;endoplasmic reticulum membrane;NADP binding;integral component of membrane	K22904	PLPP6	http://www.genome.jp/dbget-bin/www_bget?ko:K22904	-	-	-	-	sp|Q5TZ07|PLPP6_DANRE	Phospholipid phosphatase 6 OS=Danio rerio OX=7955 GN=plpp6 PE=2 SV=1
gene4565	4452	17.94	23.04	16.31	1.32	1.89	2.07	-2.98216	1.72319e-14	1.91452e-12	thrap3	XP_010729939.3;XP_010729941.3	thyroid hormone receptor-associated protein 3 isoform X1 [Larimichthys crocea];thyroid hormone receptor-associated protein 3 isoform X2 [Larimichthys crocea]	GO:0000184;GO:0006417;GO:0051028;GO:0003723;GO:0008380;GO:0005737;GO:0006397;GO:0005634	nuclear-transcribed mRNA catabolic process, nonsense-mediated decay;regulation of translation;mRNA transport;RNA binding;RNA splicing;cytoplasm;mRNA processing;nucleus	K13112	THRAP3	http://www.genome.jp/dbget-bin/www_bget?ko:K13112	-	-	-	-	sp|Q5M7V8|TR150_RAT	Thyroid hormone receptor-associated protein 3 OS=Rattus norvegicus OX=10116 GN=Thrap3 PE=1 SV=1
gene16684	2540	9.52	15.47	6.59	0.09	0	0.1	-7.02353	8.17373e-24	3.97083e-21	LOC104932620	XP_027143317.1	ammonium transporter Rh type B [Larimichthys crocea]	GO:0008519;GO:0005887	ammonium transmembrane transporter activity;integral component of plasma membrane	K06580	SLC42A,RHAG,RHBG,RHCG,CD241	http://www.genome.jp/dbget-bin/www_bget?ko:K06580	-	-	KOG3796	Ammonium transporter RHBG	sp|Q18PF6|RHBG_TAKRU	Ammonium transporter Rh type B OS=Takifugu rubripes OX=31033 GN=rhbg PE=1 SV=1
gene10052	4360	25.3	23.72	11.71	3.65	2.15	8.39	-1.82135	7.98433e-06	0.000109778	LOC104925511	XP_019131160.1	suppressor of tumorigenicity 14 protein homolog [Larimichthys crocea]	GO:0004252;GO:0016021;GO:0005615	serine-type endopeptidase activity;integral component of membrane;extracellular space	K08670	ST14,PRSS14	http://www.genome.jp/dbget-bin/www_bget?ko:K08670	MicroRNAs in cancer	ko05206	-	-	sp|P56677|ST14_MOUSE	Suppressor of tumorigenicity 14 protein homolog OS=Mus musculus OX=10090 GN=St14 PE=1 SV=2
gene5245	1100	4.53	10.28	7.18	1.31	0.51	4.72	-1.60903	0.0102671	0.0430785	LOC104920307	TKS78665.1	Selenoprotein M [Collichthys lucidus]	-	-	-	-	-	-	-	-	-	sp|Q802G7|SELM_DANRE	Selenoprotein M OS=Danio rerio OX=7955 GN=Selenom PE=2 SV=2
gene7353	5382	5.76	5.21	5.55	0.7	0.94	1.35	-2.06292	9.06845e-09	2.89536e-07	kif21a	XP_027138646.1;TMS05393.1;XP_027138642.1;XP_027138643.1	kinesin-like protein KIF21A isoform X7 [Larimichthys crocea];hypothetical protein E3U43_004643 [Larimichthys crocea];kinesin-like protein KIF21A isoform X3 [Larimichthys crocea];kinesin-like protein KIF21A isoform X4 [Larimichthys crocea]	GO:0008017;GO:0007018;GO:1990939;GO:0005524;GO:0005856	microtubule binding;microtubule-based movement;microtubule motor activity;ATP binding;cytoskeleton	K24185	KIF21	http://www.genome.jp/dbget-bin/www_bget?ko:K24185	-	-	KOG0244	Kinesin-like protein	sp|Q9QXL2|KI21A_MOUSE;sp|Q7Z4S6|KI21A_HUMAN	Kinesin-like protein KIF21A OS=Mus musculus OX=10090 GN=Kif21a PE=1 SV=2;Kinesin-like protein KIF21A OS=Homo sapiens OX=9606 GN=KIF21A PE=1 SV=2
gene1494	2823	0.42	1.14	0.6	0.02	0.16	0.09	-2.44265	0.00701052	0.031749	LOC104931492	XP_027136325.1	homeobox protein SIX5 [Larimichthys crocea]	GO:0007275;GO:0005634;GO:0003677;GO:0000981	multicellular organism development;nucleus;DNA binding;DNA-binding transcription factor activity, RNA polymerase II-specific	K15615	SIX4	http://www.genome.jp/dbget-bin/www_bget?ko:K15615	Transcriptional misregulation in cancer	ko05202	KOG0775	Transcription factor SIX and related HOX domain proteins	sp|Q61321|SIX4_MOUSE	Homeobox protein SIX4 OS=Mus musculus OX=10090 GN=Six4 PE=1 SV=1
novel.16776	1755	14.76	25.51	10.61	1.44	0.25	8.63	-2.27569	0.00291867	0.015654	-	TKS65620.1	ATP-dependent DNA helicase PIF1 [Collichthys lucidus]	GO:0006281;GO:0005524;GO:0006310;GO:0003678;GO:0016787;GO:0000723	DNA repair;ATP binding;DNA recombination;DNA helicase activity;hydrolase activity;telomere maintenance	-	-	-	-	-	-	-	-	-
gene7738	3162	24.85	25.52	25.81	8.32	5.32	12.74	-1.03766	0.00043488	0.00322496	tmem245	KAE8277380.1;XP_010734291.1;XP_010734292.1	Transmembrane protein 245 [Larimichthys crocea];transmembrane protein 245 isoform X1 [Larimichthys crocea];transmembrane protein 245 isoform X2 [Larimichthys crocea]	GO:0016021	integral component of membrane	-	-	-	-	-	KOG2365	Uncharacterized membrane protein	sp|Q9H330|TM245_HUMAN	Transmembrane protein 245 OS=Homo sapiens OX=9606 GN=TMEM245 PE=1 SV=3
gene18275	3279	4.1	6.57	3.09	1.42	1.31	2.01	-1.12019	0.00576886	0.0270699	tyw1	TMS07725.1	S-adenosyl-L-methionine-dependent tRNA 4-demethylwyosine synthase [Larimichthys crocea]	GO:0016021;GO:0102521;GO:0051539;GO:0010181;GO:0046872;GO:0008033	integral component of membrane;tRNA-4-demethylwyosine synthase activity;4 iron, 4 sulfur cluster binding;FMN binding;metal ion binding;tRNA processing	K15449	TYW1	http://www.genome.jp/dbget-bin/www_bget?ko:K15449	-	-	KOG1160	Fe-S oxidoreductase	sp|Q08C92|TYW1_DANRE	S-adenosyl-L-methionine-dependent tRNA 4-demethylwyosine synthase TYW1 OS=Danio rerio OX=7955 GN=tyw1 PE=2 SV=1
gene15227	4284	0.8	3.76	0.24	0.04	0	0.03	-5.58714	1.21172e-06	2.1645e-05	LOC104931049	XP_019110758.2;XP_019110757.2	collagen alpha-1(XXVIII) chain isoform X2 [Larimichthys crocea];collagen alpha-1(XXVIII) chain isoform X1 [Larimichthys crocea]	GO:0004867;GO:0005581;GO:0007155	serine-type endopeptidase inhibitor activity;collagen trimer;cell adhesion	K23619	COL28A	http://www.genome.jp/dbget-bin/www_bget?ko:K23619	Protein digestion and absorption	ko04974	-	-	sp|Q2UY09|COSA1_HUMAN	Collagen alpha-1(XXVIII) chain OS=Homo sapiens OX=9606 GN=COL28A1 PE=2 SV=2
gene1434	2762	1.98	0.52	0.47	0.06	0.02	0.02	-4.32833	2.55779e-05	0.00029752	LOC104930316	XP_010743371.1	cone cGMP-specific 3&apos;,5&apos;-cyclic phosphodiesterase subunit alpha&apos;-like [Larimichthys crocea]	GO:0046872;GO:0005576;GO:0004114;GO:0007165	metal ion binding;extracellular region;3',5'-cyclic-nucleotide phosphodiesterase activity;signal transduction	K13757	PDE6C	http://www.genome.jp/dbget-bin/www_bget?ko:K13757	Purine metabolism	ko00230	-	-	sp|P52731|PDE6C_CHICK	Cone cGMP-specific 3&apos;,5&apos;-cyclic phosphodiesterase subunit alpha&apos; OS=Gallus gallus OX=9031 GN=PDE6C PE=1 SV=1
gene10209	2577	9.01	1.39	2.09	0	0	0	-9.47144	1.98232e-11	1.17497e-09	LOC104925692	XP_027139630.1	nesprin-2 isoform X1 [Larimichthys crocea]	GO:0016021;GO:0008168;GO:0001510;GO:0051015;GO:0034993;GO:0009452	integral component of membrane;methyltransferase activity;RNA methylation;actin filament binding;meiotic nuclear membrane microtubule tethering complex;7-methylguanosine RNA capping	K19346	SYNE2	http://www.genome.jp/dbget-bin/www_bget?ko:K19346	-	-	-	-	sp|Q8WXH0|SYNE2_HUMAN	Nesprin-2 OS=Homo sapiens OX=9606 GN=SYNE2 PE=1 SV=3
gene19447	2641	5.33	3.2	2.28	0.76	0.75	1.61	-1.42987	0.00165003	0.00979658	tc2n	KAE8290278.1	Tandem C2 domains nuclear protein [Larimichthys crocea]	GO:0005634	nucleus	K17287	TC2N	http://www.genome.jp/dbget-bin/www_bget?ko:K17287	-	-	-	-	sp|Q8N9U0|TAC2N_HUMAN	Tandem C2 domains nuclear protein OS=Homo sapiens OX=9606 GN=TC2N PE=1 SV=2
gene23563	4914	6.83	14.69	4.21	0.54	0.41	1.9	-2.92868	4.82803e-08	1.27525e-06	LOC104939911	XP_027139637.1	adhesion G protein-coupled receptor F5-like isoform X2 [Larimichthys crocea]	-	-	K13912	DMBT1	http://www.genome.jp/dbget-bin/www_bget?ko:K13912	Salivary secretion	ko04970	-	-	sp|Q5T601|AGRF1_HUMAN	Adhesion G-protein coupled receptor F1 OS=Homo sapiens OX=9606 GN=ADGRF1 PE=1 SV=2
gene8181	1118	0.7	2.48	0.57	0.06	0.12	0	-3.71066	0.00434209	0.0216067	lamp3	XP_010734916.3	lysosome-associated membrane glycoprotein 3 [Larimichthys crocea]	GO:0005765;GO:0016021	lysosomal membrane;integral component of membrane	K06562	LAMP3,CD208	http://www.genome.jp/dbget-bin/www_bget?ko:K06562	Lysosome	ko04142	-	-	sp|Q8MJJ2|LAMP3_MACMU	Lysosome-associated membrane glycoprotein 3 OS=Macaca mulatta OX=9544 GN=LAMP3 PE=2 SV=1
gene16491	3792	4.47	8.16	4.31	1.79	1.34	2.71	-1.07636	0.00509495	0.0245684	LOC104932414	XP_027137964.1;TMS01133.1	alpha-mannosidase 2-like isoform X2 [Larimichthys crocea];Alpha-mannosidase 2 [Larimichthys crocea]	GO:0004559;GO:0030246;GO:0006013	alpha-mannosidase activity;carbohydrate binding;mannose metabolic process	K01231	MAN2	http://www.genome.jp/dbget-bin/www_bget?ko:K01231	N-Glycan biosynthesis;Various types of N-glycan biosynthesis	ko00510,ko00513	-	-	sp|P49641|MA2A2_HUMAN;sp|P28494|MA2A1_RAT;sp|P27046|MA2A1_MOUSE	Alpha-mannosidase 2x OS=Homo sapiens OX=9606 GN=MAN2A2 PE=2 SV=3;Alpha-mannosidase 2 OS=Rattus norvegicus OX=10116 GN=Man2a1 PE=1 SV=2;Alpha-mannosidase 2 OS=Mus musculus OX=10090 GN=Man2a1 PE=1 SV=2
gene21898	1941	4.34	2.2	2.66	0.69	0	0.17	-2.84538	0.00169647	0.0100231	LOC104938142	KAE8295808.1	hypothetical protein D5F01_LYC04541 [Larimichthys crocea]	GO:0016491	oxidoreductase activity	-	-	-	-	-	-	-	sp|Q9JIF5|PECR_CAVPO	Peroxisomal trans-2-enoyl-CoA reductase OS=Cavia porcellus OX=10141 GN=PECR PE=1 SV=1
novel.19535	1079	4.75	9.34	5.97	0.17	0.05	0.07	-5.8308	1.21435e-10	6.05367e-09	-	KAE8290390.1;XP_027130949.1	hypothetical protein D5F01_LYC12114 [Larimichthys crocea];uncharacterized protein LOC113744615 [Larimichthys crocea]	GO:0016021;GO:0005886	integral component of membrane;plasma membrane	-	-	-	-	-	-	-	-	-
gene5860	480	18.54	73.85	22.19	0.49	0.25	0.8	-5.82444	2.72758e-11	1.54642e-09	LOC104920976	XP_010731693.2	ubiquitin-60S ribosomal protein L40 [Larimichthys crocea]	GO:0031145;GO:0022626;GO:0035973;GO:1990000;GO:0006412;GO:0005840;GO:0005737;GO:0022625;GO:0003735;GO:0031386;GO:0005634;GO:0031625;GO:0005829;GO:0000187	anaphase-promoting complex-dependent catabolic process;cytosolic ribosome;aggrephagy;amyloid fibril formation;translation;ribosome;cytoplasm;cytosolic large ribosomal subunit;structural constituent of ribosome;protein tag;nucleus;ubiquitin protein ligase binding;cytosol;obsolete activation of MAPK activity	K02927	RP-L40e,RPL40,UBA52	http://www.genome.jp/dbget-bin/www_bget?ko:K02927	Mitophagy - animal;Ubiquitin mediated proteolysis;Ribosome;Shigellosis;Coronavirus disease - COVID-19;Kaposi sarcoma-associated herpesvirus infection;Parkinson disease;Pathways of neurodegeneration - multiple diseases	ko04137,ko04120,ko03010,ko05131,ko05171,ko05167,ko05012,ko05022	KOG0003	Ubiquitin/60s ribosomal protein L40 fusion	sp|P63048|RL40_BOVIN	Ubiquitin-60S ribosomal protein L40 OS=Bos taurus OX=9913 GN=UBA52 PE=1 SV=2
novel.14719	386	9.01	9.44	13.74	0	0	0.95	-4.85585	0.00033635	0.0025977	-	KAE8279220.1	hypothetical protein D5F01_LYC22806 [Larimichthys crocea]	GO:0008270	zinc ion binding	-	-	-	-	-	-	-	-	-
gene22024	3102	2.89	7.36	1.61	0.42	0.19	0.36	-3.17077	3.41998e-07	7.23599e-06	ano7	XP_027136752.1	anoctamin-7 [Larimichthys crocea]	GO:0005886;GO:0016021;GO:0046983;GO:0061588	plasma membrane;integral component of membrane;protein dimerization activity;calcium activated phospholipid scrambling	K19501	ANO7,NGEP,TMEM16G	http://www.genome.jp/dbget-bin/www_bget?ko:K19501	-	-	KOG2514	Uncharacterized conserved protein	sp|Q6IFT6|ANO7_RAT	Anoctamin-7 OS=Rattus norvegicus OX=10116 GN=Ano7 PE=2 SV=1
novel.11076	720	36.12	52.49	28.82	1.6	0.47	1.37	-4.68991	3.21245e-20	9.82612e-18	-	-	-	-	-	-	-	-	-	-	-	-	-	-
gene280	1180	2.95	3.91	3.12	0.4	0.29	0.86	-2.37398	4.82095e-05	0.000505262	LOC104918004	KAE8297346.1	Retinoblastoma-like protein 2 [Larimichthys crocea]	GO:0051726;GO:0005634;GO:0006357;GO:0051302;GO:0005667;GO:0051301	regulation of cell cycle;nucleus;regulation of transcription by RNA polymerase II;regulation of cell division;transcription regulator complex;cell division	K04681	RBL1	http://www.genome.jp/dbget-bin/www_bget?ko:K04681	Cell cycle;Cellular senescence;TGF-beta signaling pathway;Viral carcinogenesis;Human papillomavirus infection	ko04110,ko04218,ko04350,ko05203,ko05165	KOG1010	Rb (Retinoblastoma tumor suppressor)-related protein	sp|Q08999|RBL2_HUMAN	Retinoblastoma-like protein 2 OS=Homo sapiens OX=9606 GN=RBL2 PE=1 SV=3
gene3517	1322	8.81	11.84	5.45	2.39	1.09	3.57	-1.56021	0.000468702	0.00342756	mob3c	XP_010728515.1;XP_010728516.1	MOB kinase activator 3C isoform X1 [Larimichthys crocea];MOB kinase activator 3C isoform X2 [Larimichthys crocea]	GO:0016301	kinase activity	-	-	-	-	-	KOG0440;KOG1903	Cell cycle-associated protein Mob1-1;Cell cycle-associated protein	sp|Q5EAA4|MOB3C_BOVIN	MOB kinase activator 3C OS=Bos taurus OX=9913 GN=MOB3C PE=2 SV=1
gene22623	1370	1082.87	969.51	460.77	8.88	6.74	8.1	-6.22856	8.26323e-50	5.11824e-46	LOC104938915	XP_010753676.1	keratin, type I cytoskeletal 13 [Larimichthys crocea]	GO:0005882;GO:0005198	intermediate filament;structural molecule activity	K07604	KRT1	http://www.genome.jp/dbget-bin/www_bget?ko:K07604	Staphylococcus aureus infection;Estrogen signaling pathway	ko05150,ko04915	-	-	sp|Q8JFQ6|K1C13_ONCMY	Keratin, type I cytoskeletal 13 OS=Oncorhynchus mykiss OX=8022 GN=krt13 PE=2 SV=1
gene11868	5196	300.36	330.98	231.72	23.63	31.96	26.2	-2.90828	2.66533e-12	1.87091e-10	col1a2	TMS18700.1	Collagen alpha-2(I) chain [Larimichthys crocea]	GO:0005581;GO:0005201	collagen trimer;extracellular matrix structural constituent	K06236	COL1A	http://www.genome.jp/dbget-bin/www_bget?ko:K06236	Focal adhesion;PI3K-Akt signaling pathway;ECM-receptor interaction;Proteoglycans in cancer;Diabetic cardiomyopathy;AGE-RAGE signaling pathway in diabetic complications;Amoebiasis;Human papillomavirus infection;Protein digestion and absorption;Relaxin signaling pathway;Platelet activation	ko04510,ko04151,ko04512,ko05205,ko05415,ko04933,ko05146,ko05165,ko04974,ko04926,ko04611	-	-	sp|O93484|CO1A2_ONCMY	Collagen alpha-2(I) chain OS=Oncorhynchus mykiss OX=8022 GN=col1a2 PE=2 SV=2
gene3269	826	4.26	11.7	4.29	0	1.1	0.91	-2.61691	0.00492261	0.0238721	slc50a1	KAE8288828.1;XP_010728151.3	Sugar transporter SWEET1 RAG1-activating protein 1 Solute carrier family 50 member 1 [Larimichthys crocea];sugar transporter SWEET1 [Larimichthys crocea]	GO:0008643;GO:0005886;GO:0016021	carbohydrate transport;plasma membrane;integral component of membrane	K15382	SLC50A,SWEET	http://www.genome.jp/dbget-bin/www_bget?ko:K15382	-	-	-	-	sp|Q5EB14|SWET1_DANRE	Sugar transporter SWEET1 OS=Danio rerio OX=7955 GN=slc50a1 PE=2 SV=2
gene22855	1015	15.78	27.34	8.37	4.23	2.75	8.12	-1.42394	0.0030845	0.0163434	LOC104939157	XP_010753949.1	transmembrane gamma-carboxyglutamic acid protein 2 [Larimichthys crocea]	GO:0005576;GO:0016021;GO:0005509	extracellular region;integral component of membrane;calcium ion binding	-	-	-	-	-	-	-	sp|Q8R182|TMG2_MOUSE	Transmembrane gamma-carboxyglutamic acid protein 2 OS=Mus musculus OX=10090 GN=Prrg2 PE=1 SV=1
gene19489	2198	33.62	56.92	19.97	5.67	4.19	21.93	-1.59476	0.00169872	0.0100328	ankh	XP_027130010.1	progressive ankylosis protein homolog [Larimichthys crocea]	GO:0016021;GO:0015114	integral component of membrane;phosphate ion transmembrane transporter activity	K22734	ANKH,SLC62A1	http://www.genome.jp/dbget-bin/www_bget?ko:K22734	-	-	-	-	sp|P58369|ANKH_TETNG	Progressive ankylosis protein homolog OS=Tetraodon nigroviridis OX=99883 GN=ankh PE=2 SV=2
gene4882	2361	0.45	1.26	0.07	0.05	0	0.03	-4.10633	0.00324212	0.017022	slc13a3	XP_010730352.2	solute carrier family 13 member 3 isoform X1 [Larimichthys crocea]	GO:0016021;GO:0022857;GO:0006814	integral component of membrane;transmembrane transporter activity;sodium ion transport	K14445	SLC13A2_3_5	http://www.genome.jp/dbget-bin/www_bget?ko:K14445	-	-	KOG1281	Na+/dicarboxylate, Na+/tricarboxylate and phosphate transporters	sp|Q8WWT9|S13A3_HUMAN	Solute carrier family 13 member 3 OS=Homo sapiens OX=9606 GN=SLC13A3 PE=1 SV=1
gene7764	1730	6.68	10.61	2.92	0.39	0.04	0.04	-4.96439	2.44677e-09	8.98093e-08	msh5	KAE8288785.1;XP_027142060.1	MutS protein-like protein 5 [Larimichthys crocea];mutS protein homolog 5 isoform X2 [Larimichthys crocea]	GO:0006298;GO:0005524;GO:0030983	mismatch repair;ATP binding;mismatched DNA binding	K08741	MSH5	http://www.genome.jp/dbget-bin/www_bget?ko:K08741	-	-	KOG0218;KOG0221	Mismatch repair MSH3;Mismatch repair ATPase MSH5 (MutS family)	sp|O43196|MSH5_HUMAN	MutS protein homolog 5 OS=Homo sapiens OX=9606 GN=MSH5 PE=1 SV=1
novel.21764	650	4.27	2.66	2.92	0.67	0	0.29	-3.32678	0.00231434	0.0129787	-	-	-	-	-	-	-	-	-	-	-	-	-	-
gene17244	1292	46.45	93	53.26	4.02	9.28	13.5	-2.44181	4.88669e-07	9.88348e-06	LOC104933196	XP_027132011.1	NLR family CARD domain-containing protein 3-like [Larimichthys crocea]	-	-	K22614	NLRC3,NOD3	http://www.genome.jp/dbget-bin/www_bget?ko:K22614	-	-	-	-	sp|Q5DU56|NLRC3_MOUSE	Protein NLRC3 OS=Mus musculus OX=10090 GN=Nlrc3 PE=1 SV=2
gene17318	2527	0.61	0.05	1.44	0	0.02	0	-6.02107	0.000300002	0.00235589	LOC104933277	TMS19861.1	Fibronectin type III domain-containing protein 7 [Larimichthys crocea]	-	-	K24487	FNDC7	http://www.genome.jp/dbget-bin/www_bget?ko:K24487	-	-	-	-	sp|A2AED3|FNDC7_MOUSE	Fibronectin type III domain-containing protein 7 OS=Mus musculus OX=10090 GN=Fndc7 PE=2 SV=1
gene6461	2337	8.25	0.9	4.65	0	0	0	-9.50048	2.52668e-11	1.44575e-09	LOC104921643	XP_010732536.3	uncharacterized protein LOC104921643 isoform X2 [Larimichthys crocea]	GO:0016021;GO:0051260;GO:0016020	integral component of membrane;protein homooligomerization;membrane	-	-	-	-	-	-	-	-	-
gene21485	1629	0.31	0.95	0.61	0.08	0.04	0.08	-2.868	0.00962104	0.040894	cyyr1	XP_010752317.1	cysteine and tyrosine-rich protein 1 [Larimichthys crocea]	GO:0016021	integral component of membrane	-	-	-	-	-	-	-	sp|Q6NYG4|CYYR1_DANRE	Cysteine and tyrosine-rich protein 1 OS=Danio rerio OX=7955 GN=cyyr1 PE=2 SV=1
gene14623	2911	15.6	19.13	9.61	2.32	2.17	5.82	-1.7756	4.73994e-06	6.98549e-05	LOC104930392	XP_010743470.1;TKS89587.1	SWI/SNF-related matrix-associated actin-dependent regulator of chromatin subfamily D member 2 [Larimichthys crocea];SWI/SNF-related matrix-associated actin-dependent regulator of chromatin subfamily D member 2 [Collichthys lucidus]	GO:0016514;GO:0002244;GO:0043044;GO:0030223	SWI/SNF complex;hematopoietic progenitor cell differentiation;chromatin remodeling;neutrophil differentiation	K11650	SMARCD	http://www.genome.jp/dbget-bin/www_bget?ko:K11650	Hepatocellular carcinoma;Thermogenesis	ko05225,ko04714	KOG2570	SWI/SNF transcription activation complex subunit	sp|Q92925|SMRD2_HUMAN;sp|E1BJD1|SMRD2_BOVIN	SWI/SNF-related matrix-associated actin-dependent regulator of chromatin subfamily D member 2 OS=Homo sapiens OX=9606 GN=SMARCD2 PE=1 SV=3;SWI/SNF-related matrix-associated actin-dependent regulator of chromatin subfamily D member 2 OS=Bos taurus OX=9913 GN=SMARCD2 PE=3 SV=1
novel.10274	921	10.1	14.53	11.07	2.69	1.38	3.87	-1.82661	2.11534e-05	0.000253923	-	TKS92934.1	hypothetical protein D9C73_027079 [Collichthys lucidus]	-	-	-	-	-	-	-	-	-	-	-
gene6078	3182	10.72	11.84	9.21	3.13	2	4.8	-1.33679	1.14444e-05	0.000149313	erap2	XP_019110411.2;XP_019110410.2	endoplasmic reticulum aminopeptidase 2 isoform X2 [Larimichthys crocea];endoplasmic reticulum aminopeptidase 2 isoform X1 [Larimichthys crocea]	GO:0070006;GO:0005783;GO:0005886;GO:0008270;GO:0031225;GO:0019885	metalloaminopeptidase activity;endoplasmic reticulum;plasma membrane;zinc ion binding;anchored component of membrane;antigen processing and presentation of endogenous peptide antigen via MHC class I	K13723	ERAP2	http://www.genome.jp/dbget-bin/www_bget?ko:K13723	-	-	-	-	sp|A6QPT7|ERAP2_BOVIN	Endoplasmic reticulum aminopeptidase 2 OS=Bos taurus OX=9913 GN=ERAP2 PE=2 SV=1
gene19241	1981	17.88	38.8	12.79	3.47	0.89	5.27	-2.67449	9.26492e-08	2.28633e-06	LOC104935350	KAE8290291.1;XP_027130368.1;XP_027130369.1	hypothetical protein D5F01_LYC12013 [Larimichthys crocea];T-cell receptor beta-1 chain C region [Larimichthys crocea];immunoglobulin lambda-1 light chain-like [Larimichthys crocea]	GO:0005886;GO:0016021	plasma membrane;integral component of membrane	K10785	TRBV	http://www.genome.jp/dbget-bin/www_bget?ko:K10785	Calcium signaling pathway;NF-kappa B signaling pathway;Rap1 signaling pathway;Ras signaling pathway;Cell adhesion molecules;PD-L1 expression and PD-1 checkpoint pathway in cancer;Transcriptional misregulation in cancer;Viral myocarditis;Type I diabetes mellitus;Allograft rejection;Asthma;Autoimmune thyroid disease;Graft-versus-host disease;Inflammatory bowel disease;Rheumatoid arthritis;Systemic …	ko04020,ko04064,ko04015,ko04014,ko04514,ko05235,ko05202,ko05416,ko04940,ko05330,ko05310,ko05320,ko05332,ko05321,ko05323,ko05322,ko05150,ko05135,ko05142,ko05144,ko05169,ko05166,ko05170,ko05162,ko04612,ko04672,ko04660,ko04658,ko04659	-	-	sp|P0DSE2|TRBR1_HUMAN;sp|P01852|TCB1_MOUSE;sp|P11364|TCB_FLV	M1-specific T cell receptor beta chain OS=Homo sapiens OX=9606 GN=TRB PE=1 SV=1;T-cell receptor beta-1 chain C region OS=Mus musculus OX=10090 PE=1 SV=1;Viral T-cell receptor beta chain-like T17T-22 OS=Feline leukemia virus OX=11768 GN=V-TCR PE=4 SV=1
gene10214	1199	6.92	7.38	2.04	1.26	0.29	1.39	-2.21651	0.000727943	0.00496026	LOC104925681	KAE8286723.1	hypothetical protein D5F01_LYC14670 [Larimichthys crocea]	GO:0051988;GO:0007051;GO:0007059;GO:0000776	regulation of attachment of spindle microtubules to kinetochore;spindle organization;chromosome segregation;kinetochore	-	-	-	-	-	-	-	sp|Q9Y448|SKAP_HUMAN	Small kinetochore-associated protein OS=Homo sapiens OX=9606 GN=KNSTRN PE=1 SV=2
gene1412	4846	2.8	4.42	3.11	0.3	0.45	0.6	-2.52677	5.95186e-09	2.00904e-07	tet1	XP_010743160.3;XP_010743151.3	methylcytosine dioxygenase TET3 isoform X3 [Larimichthys crocea];methylcytosine dioxygenase TET3 isoform X1 [Larimichthys crocea]	GO:0006211;GO:0008270;GO:0070579;GO:0005737;GO:0080111;GO:0003677;GO:0005634;GO:0003743	5-methylcytosine catabolic process;zinc ion binding;methylcytosine dioxygenase activity;cytoplasm;DNA demethylation;DNA binding;nucleus;translation initiation factor activity	K13097	TET1	http://www.genome.jp/dbget-bin/www_bget?ko:K13097	-	-	-	-	sp|Q8NFU7|TET1_HUMAN;sp|Q6N021|TET2_HUMAN	Methylcytosine dioxygenase TET1 OS=Homo sapiens OX=9606 GN=TET1 PE=1 SV=2;Methylcytosine dioxygenase TET2 OS=Homo sapiens OX=9606 GN=TET2 PE=1 SV=3
gene19753	370	7.95	11.81	6.12	0.49	0.53	0.54	-3.93595	0.000660198	0.00456392	LOC104935897	XP_027145629.1	ABC transporter F family member 4 isoform X3 [Larimichthys crocea]	-	-	K04574	NEFH,NF-H	http://www.genome.jp/dbget-bin/www_bget?ko:K04574	Amyotrophic lateral sclerosis;Pathways of neurodegeneration - multiple diseases	ko05014,ko05022	-	-	-	-
gene4732	1362	3.18	4.11	1.32	0.14	0.53	0.62	-2.30783	0.00128083	0.00794977	pir	XP_019133592.2;KAE8297478.1	pirin [Larimichthys crocea];Pirin [Larimichthys crocea]	GO:0031172	ornithine N5-monooxygenase activity	K06911	PIR	http://www.genome.jp/dbget-bin/www_bget?ko:K06911	-	-	-	-	sp|O00625|PIR_HUMAN	Pirin OS=Homo sapiens OX=9606 GN=PIR PE=1 SV=1
gene20836	2503	5.45	2.13	5.79	0.82	0.58	2.66	-1.60698	0.0113211	0.046632	LOC104937017	TKS87499.1;XP_027130091.1;KAE8279684.1	Collagen alpha-1(XV) chain [Collichthys lucidus];collagen alpha-1(XVIII) chain isoform X4 [Larimichthys crocea];Gamma-glutamyl hydrolase [Larimichthys crocea]	GO:0005615;GO:0005581;GO:0034722	extracellular space;collagen trimer;gamma-glutamyl-peptidase activity	K08135	COL15A	http://www.genome.jp/dbget-bin/www_bget?ko:K08135	Protein digestion and absorption	ko04974	KOG3546	Collagens (type XV)	sp|O35206|COFA1_MOUSE	Collagen alpha-1(XV) chain OS=Mus musculus OX=10090 GN=Col15a1 PE=1 SV=2
gene9773	1303	9.03	8.22	6.74	1.88	0.68	3.15	-1.70123	2.7361e-05	0.000314132	lhfpl1	KAF3847452.1;TKS80817.1	hypothetical protein F7725_020480 [Dissostichus mawsoni];Lipoma HMGIC fusion partner -like protein [Collichthys lucidus]	GO:0016021	integral component of membrane	K23893	LHFPL	http://www.genome.jp/dbget-bin/www_bget?ko:K23893	-	-	-	-	sp|Q5PRC1|LHPL6_DANRE	LHFPL tetraspan subfamily member 6 protein OS=Danio rerio OX=7955 GN=lhfpl6 PE=2 SV=1
gene19518	1901	2.81	1.11	1.44	0.22	0.35	0.79	-1.65645	0.00985467	0.0417224	LOC104935648	-	-	-	-	-	-	-	-	-	-	-	-	-
gene390	3843	5.9	9.4	5.56	1.93	0.97	3.14	-1.47008	0.000125806	0.00113592	LOC104918873	KAE8280505.1;XP_019125777.2	Stonin-1 Stoned B-like factor [Larimichthys crocea];stonin-1 [Larimichthys crocea]	GO:0006897;GO:0030100;GO:0030131;GO:0006367;GO:0006886;GO:0005672;GO:0005737	endocytosis;regulation of endocytosis;clathrin adaptor complex;transcription initiation from RNA polymerase II promoter;intracellular protein transport;transcription factor TFIIA complex;cytoplasm	K20067	STON1_2	http://www.genome.jp/dbget-bin/www_bget?ko:K20067	-	-	KOG2677;KOG2652	Stoned B synaptic vesicle biogenesis protein;RNA polymerase II transcription initiation factor TFIIA, large chain	sp|Q9Y6Q2|STON1_HUMAN	Stonin-1 OS=Homo sapiens OX=9606 GN=STON1 PE=1 SV=2
gene23583	3058	51.31	64.62	41.44	0.32	0.13	0.1	-7.70696	5.27007e-48	1.8653e-44	LOC104939929	XP_010754773.3;XP_027131082.1	calpain-1 catalytic subunit [Larimichthys crocea];calpain-1 catalytic subunit [Larimichthys crocea]	GO:0004198;GO:0005509	calcium-dependent cysteine-type endopeptidase activity;calcium ion binding	K01367	CAPN1	http://www.genome.jp/dbget-bin/www_bget?ko:K01367	Apoptosis;Cellular senescence;Necroptosis;Protein processing in endoplasmic reticulum;Shigellosis;Alzheimer disease;Pathways of neurodegeneration - multiple diseases	ko04210,ko04218,ko04217,ko04141,ko05131,ko05010,ko05022	KOG0045	Cytosolic Ca2+-dependent cysteine protease (calpain), large subunit (EF-Hand protein superfamily)	sp|P97571|CAN1_RAT;sp|O35350|CAN1_MOUSE	Calpain-1 catalytic subunit OS=Rattus norvegicus OX=10116 GN=Capn1 PE=1 SV=1;Calpain-1 catalytic subunit OS=Mus musculus OX=10090 GN=Capn1 PE=1 SV=1
gene17559	6577	3.95	8.93	6.2	0.47	0.57	1.17	-2.79135	1.31836e-10	6.53272e-09	itpr3	KAE8292689.1;XP_027131452.1	Inositol 1,4,5-trisphosphate receptor type 3 IP3 receptor isoform 3 [Larimichthys crocea];LOW QUALITY PROTEIN: inositol 1,4,5-trisphosphate receptor type 3 [Larimichthys crocea]	GO:0005262;GO:0070679;GO:0005220;GO:0005783;GO:0005789;GO:0016021	calcium channel activity;inositol 1,4,5 trisphosphate binding;inositol 1,4,5-trisphosphate-sensitive calcium-release channel activity;endoplasmic reticulum;endoplasmic reticulum membrane;integral component of membrane	K04960	ITPR3	http://www.genome.jp/dbget-bin/www_bget?ko:K04960	Apoptosis;Cellular senescence;Oocyte meiosis;Gap junction;Apelin signaling pathway;Calcium signaling pathway;Phosphatidylinositol signaling system;cGMP-PKG signaling pathway;Proteoglycans in cancer;Cushing syndrome;Shigellosis;Human cytomegalovirus infection;Human immunodeficiency virus 1 infection;Kaposi sarcoma-associated herpesvirus infection;Alzheimer disease;Amyotrophic lateral sclerosis;Par…	ko04210,ko04218,ko04114,ko04540,ko04371,ko04020,ko04070,ko04022,ko05205,ko04934,ko05131,ko05163,ko05170,ko05167,ko05010,ko05014,ko05012,ko05022,ko05020,ko05017,ko04270,ko04971,ko04972,ko04970,ko04925,ko04927,ko04915,ko04922,ko04929,ko04912,ko04935,ko04911,ko04921,ko04928,ko04924,ko04918,ko04713,ko04625,ko04621,ko04611,ko04725,ko04728,ko04724,ko04730,ko04720,ko04723,ko04726,ko04750,ko04742	KOG3533	Inositol 1,4,5-trisphosphate receptor	sp|Q14573|ITPR3_HUMAN	Inositol 1,4,5-trisphosphate receptor type 3 OS=Homo sapiens OX=9606 GN=ITPR3 PE=1 SV=2
gene1103	1990	0.24	2.6	0.44	0.03	0.06	0.13	-3.52543	0.00153983	0.00924421	slc16a4	XP_010739468.1	monocarboxylate transporter 5 [Larimichthys crocea]	GO:0016021;GO:0022857	integral component of membrane;transmembrane transporter activity	K08181	SLC16A4	http://www.genome.jp/dbget-bin/www_bget?ko:K08181	-	-	-	-	sp|Q8R0M8|MOT5_MOUSE	Monocarboxylate transporter 5 OS=Mus musculus OX=10090 GN=Slc16a4 PE=2 SV=1
novel.21142	3852	0.45	1.25	0.23	0.06	0	0.02	-4.23919	9.99277e-05	0.000938755	Mr1	TMS06151.1	Major histocompatibility complex class I-related gene protein [Larimichthys crocea]	-	-	K06751	MHC1	http://www.genome.jp/dbget-bin/www_bget?ko:K06751	Cellular senescence;Endocytosis;Phagosome;Cell adhesion molecules;Viral carcinogenesis;Viral myocarditis;Type I diabetes mellitus;Allograft rejection;Autoimmune thyroid disease;Graft-versus-host disease;Epstein-Barr virus infection;Herpes simplex virus 1 infection;Human T-cell leukemia virus 1 infection;Human cytomegalovirus infection;Human immunodeficiency virus 1 infection;Human papillomavirus …	ko04218,ko04144,ko04145,ko04514,ko05203,ko05416,ko04940,ko05330,ko05320,ko05332,ko05169,ko05168,ko05166,ko05163,ko05170,ko05165,ko05167,ko04612,ko04650	-	-	sp|Q8HWB0|HMR1_MOUSE	Major histocompatibility complex class I-related gene protein OS=Mus musculus OX=10090 GN=Mr1 PE=1 SV=2
gene13311	717	2.42	4.85	1.4	0.23	0.12	0.13	-3.71379	0.000716127	0.00489997	plekhg6	TMS10646.1	Pleckstrin homology domain-containing family G member 6 [Larimichthys crocea]	GO:0005085	guanyl-nucleotide exchange factor activity	K23861	PLEKHG6	http://www.genome.jp/dbget-bin/www_bget?ko:K23861	-	-	-	-	sp|Q8R0J1|PKHG6_MOUSE	Pleckstrin homology domain-containing family G member 6 OS=Mus musculus OX=10090 GN=Plekhg6 PE=2 SV=2
gene15380	1567	12.25	16.17	14.42	3.75	5.35	4.11	-1.17517	0.0112651	0.0464553	trim13	KAE8298997.1	Tripartite motif-containing 13 [Larimichthys crocea]	GO:0005085;GO:0035556;GO:0016021;GO:0008270;GO:0016740	guanyl-nucleotide exchange factor activity;intracellular signal transduction;integral component of membrane;zinc ion binding;transferase activity	K12003	TRIM13	http://www.genome.jp/dbget-bin/www_bget?ko:K12003	-	-	-	-	sp|Q503I2|TRI13_DANRE	Tripartite motif-containing 13 OS=Danio rerio OX=7955 GN=trim13 PE=2 SV=1
gene13108	2300	1.29	2.39	1.64	0.38	0.34	0.17	-2.03203	0.00213583	0.0121286	LOC104928798	XP_027127988.1	sodium- and chloride-dependent betaine transporter [Larimichthys crocea]	GO:0015293;GO:0016021	symporter activity;integral component of membrane	K05046	SLC6A13,GAT2	http://www.genome.jp/dbget-bin/www_bget?ko:K05046	GABAergic synapse;Synaptic vesicle cycle	ko04727,ko04721	KOG3660	Sodium-neurotransmitter symporter	sp|P48065|S6A12_HUMAN	Sodium- and chloride-dependent betaine transporter OS=Homo sapiens OX=9606 GN=SLC6A12 PE=1 SV=2
novel.11386	701	1.25	1.89	6.28	0	0.12	0.52	-3.74502	0.00190786	0.0110701	-	-	-	-	-	-	-	-	-	-	-	-	-	-
gene19737	4903	8.91	9.11	9.7	2.62	2.08	4.56	-1.2273	7.54561e-05	0.000741023	LOC104935880	XP_027141114.1;XP_027141109.1	caskin-2 isoform X7 [Larimichthys crocea];caskin-2 isoform X3 [Larimichthys crocea]	-	-	K21952	CASKIN,ANKS5	http://www.genome.jp/dbget-bin/www_bget?ko:K21952	-	-	KOG4384	Uncharacterized SAM domain protein	sp|Q8VHK1|CSKI2_MOUSE	Caskin-2 OS=Mus musculus OX=10090 GN=Caskin2 PE=1 SV=3
gene8370	1000	0.57	3.48	0.76	0	0	0	-6.42379	8.30117e-05	0.00079996	LOC104923715	XP_019122210.2	collagen alpha-1(VII) chain-like, partial [Larimichthys crocea]	-	-	K16628	COL7A	http://www.genome.jp/dbget-bin/www_bget?ko:K16628	Protein digestion and absorption	ko04974	-	-	-	-
gene6517	2132	2.41	3.67	0.99	0.36	0.13	0.39	-2.75857	2.35872e-05	0.000278284	LOC104921703	XP_010732621.3;XP_019111387.2	ras and EF-hand domain-containing protein isoform X2 [Larimichthys crocea];ras and EF-hand domain-containing protein isoform X1 [Larimichthys crocea]	GO:0005509;GO:0005525;GO:0003924	calcium ion binding;GTP binding;GTPase activity	K17199	RASEF,RAB45	http://www.genome.jp/dbget-bin/www_bget?ko:K17199	-	-	KOG0078	GTP-binding protein SEC4, small G protein superfamily, and related Ras family GTP-binding proteins	sp|A5WW21|RASEF_DANRE	Ras and EF-hand domain-containing protein OS=Danio rerio OX=7955 GN=rasef PE=2 SV=1
gene2311	3735	0.46	1.35	0.42	0.09	0.02	0.05	-3.43102	7.9122e-05	0.000770568	LOC104940210	XP_010755051.1	frizzled-3 [Larimichthys crocea]	GO:0016021;GO:0007275;GO:0042813	integral component of membrane;multicellular organism development;Wnt-activated receptor activity	K02329	FZD3	http://www.genome.jp/dbget-bin/www_bget?ko:K02329	Signaling pathways regulating pluripotency of stem cells;Hippo signaling pathway;Wnt signaling pathway;mTOR signaling pathway;MicroRNAs in cancer;Pathways in cancer;Proteoglycans in cancer;Basal cell carcinoma;Breast cancer;Gastric cancer;Hepatocellular carcinoma;Cushing syndrome;Human papillomavirus infection;Alzheimer disease;Pathways of neurodegeneration - multiple diseases;Axon guidance;Melan…	ko04550,ko04390,ko04310,ko04150,ko05206,ko05200,ko05205,ko05217,ko05224,ko05226,ko05225,ko04934,ko05165,ko05010,ko05022,ko04360,ko04916	-	-	sp|O42579|FZD3_XENLA	Frizzled-3 OS=Xenopus laevis OX=8355 GN=fzd3 PE=1 SV=1
gene8546	3997	1.21	2.05	1.63	0.04	0.06	0.15	-4.00062	4.30181e-11	2.32199e-09	slitrk6	XP_019115742.2	SLIT and NTRK-like protein 6 isoform X2 [Larimichthys crocea]	GO:0016021;GO:1905606;GO:0007409	integral component of membrane;regulation of presynapse assembly;axonogenesis	-	-	-	-	-	-	-	sp|Q9H5Y7|SLIK6_HUMAN	SLIT and NTRK-like protein 6 OS=Homo sapiens OX=9606 GN=SLITRK6 PE=2 SV=3
gene3089	963	2.24	4.45	1.5	0.45	0.23	0.32	-2.57375	0.00125977	0.00783834	LOC104917990	XP_010727891.3;XP_010727892.3	tumor necrosis factor ligand superfamily member 6 isoform X1 [Larimichthys crocea];tumor necrosis factor ligand superfamily member 6 isoform X2 [Larimichthys crocea]	GO:0006955;GO:0016020;GO:0016021;GO:0005164	immune response;membrane;integral component of membrane;tumor necrosis factor receptor binding	K04389	TNFSF6,FASL,CD178	http://www.genome.jp/dbget-bin/www_bget?ko:K04389	Apoptosis;Necroptosis;FoxO signaling pathway;MAPK signaling pathway;PI3K-Akt signaling pathway;Ras signaling pathway;Cytokine-cytokine receptor interaction;Pathways in cancer;Proteoglycans in cancer;Lipid and atherosclerosis;Platinum drug resistance;Alcoholic liver disease;Non-alcoholic fatty liver disease;Type I diabetes mellitus;Allograft rejection;Autoimmune thyroid disease;Graft-versus-host d…	ko04210,ko04217,ko04068,ko04010,ko04151,ko04014,ko04060,ko05200,ko05205,ko05417,ko01524,ko04936,ko04932,ko04940,ko05330,ko05320,ko05332,ko05130,ko05143,ko05142,ko05161,ko05160,ko05168,ko05163,ko05170,ko05165,ko05164,ko05162,ko05022,ko04650,ko04722	-	-	sp|P41047|TNFL6_MOUSE;sp|P48023|TNFL6_HUMAN	Tumor necrosis factor ligand superfamily member 6 OS=Mus musculus OX=10090 GN=Faslg PE=1 SV=1;Tumor necrosis factor ligand superfamily member 6 OS=Homo sapiens OX=9606 GN=FASLG PE=1 SV=1
gene21828	3318	7.42	6.54	6.02	1.36	1.31	2.26	-1.63466	7.69453e-07	1.45861e-05	LOC104938061	XP_010752704.1	DNA-directed RNA polymerase III subunit RPC4-like [Larimichthys crocea]	GO:0006383;GO:0003677;GO:0005666;GO:0003899	transcription by RNA polymerase III;DNA binding;RNA polymerase III complex;DNA-directed 5'-3' RNA polymerase activity	K03026	RPC4,POLR3D	http://www.genome.jp/dbget-bin/www_bget?ko:K03026	RNA polymerase;Cytosolic DNA-sensing pathway	ko03020,ko04623	KOG3122	DNA-directed RNA polymerase III subunit	sp|Q91WD1|RPC4_MOUSE	DNA-directed RNA polymerase III subunit RPC4 OS=Mus musculus OX=10090 GN=Polr3d PE=2 SV=2
novel.21580	644	24.76	13.18	8.34	1.88	2.97	5.66	-1.68153	0.00155413	0.00931653	Itih3	XP_027135469.1	inter-alpha-trypsin inhibitor heavy chain H3 [Larimichthys crocea]	GO:0030212;GO:0004867;GO:0005576	hyaluronan metabolic process;serine-type endopeptidase inhibitor activity;extracellular region	-	-	-	-	-	-	-	sp|Q63416|ITIH3_RAT	Inter-alpha-trypsin inhibitor heavy chain H3 OS=Rattus norvegicus OX=10116 GN=Itih3 PE=2 SV=1
gene19746	1662	1.07	3.72	1.29	0.19	0.15	0.72	-2.27406	0.0025308	0.0139538	LOC104935890	KAE8282706.1	hypothetical protein D5F01_LYC18095 [Larimichthys crocea]	GO:0016021	integral component of membrane	-	-	-	-	-	-	-	-	-
gene14197	4457	2.04	3.09	1.59	0.2	0.28	0.42	-2.51101	6.52198e-08	1.6693e-06	LOC104929946	XP_010742896.1	terminal nucleotidyltransferase 5A [Larimichthys crocea]	GO:1990817	RNA adenylyltransferase activity	K23033	TENT5A_B,FAM46A_B	http://www.genome.jp/dbget-bin/www_bget?ko:K23033	-	-	KOG3852	Uncharacterized conserved protein	sp|Q96IP4|TET5A_HUMAN	Terminal nucleotidyltransferase 5A OS=Homo sapiens OX=9606 GN=TENT5A PE=1 SV=2
gene14542	2070	0.53	2.54	0.54	0.09	0.09	0.16	-3.04313	0.000803891	0.00538594	slc2a10	XP_010743358.1	solute carrier family 2, facilitated glucose transporter member 10 [Larimichthys crocea]	GO:0022857;GO:0008643;GO:0016021	transmembrane transporter activity;carbohydrate transport;integral component of membrane	K08147	SLC2A10,GLUT10	http://www.genome.jp/dbget-bin/www_bget?ko:K08147	-	-	KOG0254	Predicted transporter (major facilitator superfamily)	sp|F1R0H0|GTR10_DANRE	Solute carrier family 2, facilitated glucose transporter member 10 OS=Danio rerio OX=7955 GN=slc2a10 PE=2 SV=1
gene11547	2106	8.66	5.27	2.77	0	0	0.1	-7.19911	3.35135e-12	2.30648e-10	LOC104927122	XP_010739436.1	tripartite motif-containing protein 16 [Larimichthys crocea]	GO:0008270;GO:0016874	zinc ion binding;ligase activity	-	-	-	-	-	-	-	sp|Q99PP9|TRI16_MOUSE	Tripartite motif-containing protein 16 OS=Mus musculus OX=10090 GN=Trim16 PE=1 SV=2
gene19452	5131	6.54	11.2	4.25	0.19	0.29	0.91	-3.82261	1.5589e-13	1.43581e-11	LOC104935575	XP_010749735.1;XP_036978300.1	copine-8 isoform X1 [Larimichthys crocea];copine-8 isoform X5 [Acanthopagrus latus]	-	-	K24523	CPNE5_8_9	http://www.genome.jp/dbget-bin/www_bget?ko:K24523	-	-	-	-	sp|Q86YQ8|CPNE8_HUMAN	Copine-8 OS=Homo sapiens OX=9606 GN=CPNE8 PE=1 SV=2
novel.21761	548	2.17	11.55	5.25	0.18	0	0	-6.06489	4.06255e-05	0.000437625	-	XP_027145048.1	uncharacterized protein LOC109143113 isoform X1 [Larimichthys crocea]	GO:0006260;GO:0000166;GO:0003887;GO:0003677	DNA replication;nucleotide binding;DNA-directed DNA polymerase activity;DNA binding	-	-	-	-	-	-	-	-	-
novel.2252	711	3.4	7	2.99	0.47	0.48	0.76	-2.56056	0.000645416	0.00447546	Smim29	XP_027128867.1	small integral membrane protein 29-like [Larimichthys crocea]	GO:0016021	integral component of membrane	-	-	-	-	-	-	-	sp|Q8R043|SIM29_MOUSE	Small integral membrane protein 29 OS=Mus musculus OX=10090 GN=Smim29 PE=3 SV=2
gene20899	3935	38.27	47.22	17.98	6.76	3.46	11.56	-1.92221	3.59701e-06	5.55607e-05	LOC104937078	XP_027131146.1	LOW QUALITY PROTEIN: unconventional myosin-Ie [Larimichthys crocea]	GO:0032835;GO:0003094;GO:0016459;GO:0005524;GO:0003779;GO:0003774	glomerulus development;glomerular filtration;myosin complex;ATP binding;actin binding;cytoskeletal motor activity	K10356	MYO1	http://www.genome.jp/dbget-bin/www_bget?ko:K10356	Pathogenic Escherichia coli infection	ko05130	KOG0164	Myosin class I heavy chain	sp|Q63356|MYO1E_RAT	Unconventional myosin-Ie OS=Rattus norvegicus OX=10116 GN=Myo1e PE=1 SV=1
novel.21077	417	4.51	19.07	7.33	1.44	0.76	1.88	-2.51888	0.00601831	0.0280809	-	TKS65475.1	hypothetical protein D9C73_028281 [Collichthys lucidus]	GO:0003964;GO:0005179;GO:0005576	RNA-directed DNA polymerase activity;hormone activity;extracellular region	K22909	ZC3H13	http://www.genome.jp/dbget-bin/www_bget?ko:K22909	-	-	-	-	-	-
gene10998	1068	0.15	2.84	1.65	0	0.07	0	-5.57991	0.000731068	0.00497608	LOC104926527	KAE8285296.1	KN motif and ankyrin repeat domain-containing protein 1 [Larimichthys crocea]	-	-	K22808	KANK	http://www.genome.jp/dbget-bin/www_bget?ko:K22808	-	-	KOG0514	Ankyrin repeat protein	sp|Q14678|KANK1_HUMAN	KN motif and ankyrin repeat domain-containing protein 1 OS=Homo sapiens OX=9606 GN=KANK1 PE=1 SV=3
gene19654	2032	1.15	2.25	1.67	0.08	0.18	0.1	-3.1149	5.94035e-05	0.000607171	LOC104935790	XP_038548039.1;XP_027140637.1	deleted in malignant brain tumors 1 protein-like isoform X6 [Micropterus salmoides];deleted in malignant brain tumors 1 protein isoform X2 [Larimichthys crocea]	GO:0005044;GO:0016021;GO:0005886	scavenger receptor activity;integral component of membrane;plasma membrane	K13912	DMBT1	http://www.genome.jp/dbget-bin/www_bget?ko:K13912	Salivary secretion	ko04970	-	-	sp|Q95218|DMBT1_RABIT	Deleted in malignant brain tumors 1 protein OS=Oryctolagus cuniculus OX=9986 GN=Dmbt1 PE=1 SV=2
gene5277	4873	5.75	7.64	5.02	0.92	0.74	2.47	-1.78265	1.00597e-06	1.83805e-05	LOC104920332	XP_010730877.2;XP_019130877.1	sodium- and chloride-dependent GABA transporter ine isoform X1 [Larimichthys crocea];sodium- and chloride-dependent GABA transporter 1 isoform X2 [Larimichthys crocea]	GO:0016021;GO:0015293	integral component of membrane;symporter activity	K05039	SLC6A6,TAUT	http://www.genome.jp/dbget-bin/www_bget?ko:K05039	-	-	-	-	sp|P31648|SC6A1_MOUSE;sp|Q9VR07|INE_DROME	Sodium- and chloride-dependent GABA transporter 1 OS=Mus musculus OX=10090 GN=Slc6a1 PE=1 SV=2;Sodium- and chloride-dependent GABA transporter ine OS=Drosophila melanogaster OX=7227 GN=ine PE=1 SV=1
gene3567	1231	106.38	493.69	132.6	13.04	20.62	50.61	-2.79557	3.11481e-06	4.93689e-05	LOC104918515	XP_010728592.3	protein let-653-like [Larimichthys crocea]	GO:0003796	lysozyme activity	-	-	-	-	-	-	-	sp|Q17005|LYSC1_ANOGA	Lysozyme c-1 OS=Anopheles gambiae OX=7165 GN=AGAP007347 PE=2 SV=2
novel.21701	623	11.42	6.77	1.97	1.02	0.3	1.58	-2.44475	0.00281305	0.0151744	-	-	-	-	-	-	-	-	-	-	-	-	-	-
gene15027	2102	27.88	188.94	41.76	8.5	9.31	25.45	-2.26696	0.00051129	0.00368891	LOC104930830	XP_027138280.1	integumentary mucin C.1-like [Larimichthys crocea]	-	-	K10955	MUC2	http://www.genome.jp/dbget-bin/www_bget?ko:K10955	Gastric cancer;Amoebiasis	ko05226,ko05146	-	-	-	-
gene6165	2136	2.29	3.12	0.93	0.14	0.11	0.87	-2.32325	0.001393	0.00851751	LOC104921316	XP_010732109.2	coiled-coil domain-containing protein 149 isoform X2 [Larimichthys crocea]	-	-	-	-	-	-	-	-	-	sp|Q6DH86|C149B_DANRE	Coiled-coil domain-containing protein 149-B OS=Danio rerio OX=7955 GN=ccdc149b PE=2 SV=1
gene21784	909	293.49	307.27	188.45	43.21	28.97	63.5	-2.15656	1.48367e-12	1.10389e-10	LOC104938017	XP_010752648.1	zymogen granule membrane protein 16 [Larimichthys crocea]	GO:0042589;GO:0030246	zymogen granule membrane;carbohydrate binding	-	-	-	-	-	-	-	sp|Q8CJD3|ZG16_RAT	Zymogen granule membrane protein 16 OS=Rattus norvegicus OX=10116 GN=Zg16 PE=2 SV=1
gene1222	4601	1.56	1.83	0.64	0.13	0.08	0.21	-2.87109	4.20848e-07	8.66743e-06	kif14	TMS20472.1	Kinesin-like protein KIF14 [Larimichthys crocea]	GO:0004930;GO:0007166;GO:0008017;GO:0007018;GO:1990939;GO:0005524;GO:0016021	G protein-coupled receptor activity;cell surface receptor signaling pathway;microtubule binding;microtubule-based movement;microtubule motor activity;ATP binding;integral component of membrane	K17915	KIF14	http://www.genome.jp/dbget-bin/www_bget?ko:K17915	-	-	KOG0245	Kinesin-like protein	sp|Q15058|KIF14_HUMAN	Kinesin-like protein KIF14 OS=Homo sapiens OX=9606 GN=KIF14 PE=1 SV=1
novel.20909	818	4.15	5.73	2.15	0.19	0.29	0.41	-3.3496	3.35525e-05	0.000375134	-	-	-	-	-	-	-	-	-	-	-	-	-	-
gene4800	6272	3.88	4.97	3.81	0.79	0.48	0.77	-2.23173	1.72574e-09	6.58813e-08	robo1	XP_010730241.3;XP_019117393.2	roundabout homolog 1 isoform X3 [Larimichthys crocea];roundabout homolog 1 isoform X5 [Larimichthys crocea]	-	-	K06753	ROBO1	http://www.genome.jp/dbget-bin/www_bget?ko:K06753	Axon guidance	ko04360	KOG4222	Axon guidance receptor Dscam	sp|Q9Y6N7|ROBO1_HUMAN;sp|O89026|ROBO1_MOUSE	Roundabout homolog 1 OS=Homo sapiens OX=9606 GN=ROBO1 PE=1 SV=1;Roundabout homolog 1 OS=Mus musculus OX=10090 GN=Robo1 PE=1 SV=1
novel.15422	1855	6.11	6.32	4.54	0.69	0.17	1.1	-2.84563	1.83447e-08	5.40437e-07	-	-	-	-	-	-	-	-	-	-	-	-	-	-
gene18703	1582	0.86	1.73	0.16	0.04	0	0.04	-4.67	0.00130821	0.00809444	LOC104934771	KAE8291708.1	RING finger protein 223 [Larimichthys crocea]	GO:0016021;GO:0046872	integral component of membrane;metal ion binding	-	-	-	-	-	-	-	sp|Q3UV31|RN223_MOUSE	RING finger protein 223 OS=Mus musculus OX=10090 GN=Rnf223 PE=2 SV=2
gene17310	2962	4.04	3.58	2.26	0.73	0.72	1.46	-1.3948	0.000511623	0.00369024	LOC104933265	XP_010746973.2	uncharacterized protein LOC104933265 isoform X1 [Larimichthys crocea]	GO:0016021	integral component of membrane	-	-	-	-	-	-	-	-	-
gene14275	1048	1.66	4.73	3.04	0.6	0.65	0.79	-2.0287	0.00540633	0.0257882	LOC104930041	KAE8300569.1;XP_027139033.1;XP_027139037.1	Titin [Larimichthys crocea];B-cell receptor CD22 isoform X8 [Larimichthys crocea];B-cell receptor CD22-like [Larimichthys crocea]	GO:0005886;GO:0016021	plasma membrane;integral component of membrane	K06467	CD22,SIGLEC2	http://www.genome.jp/dbget-bin/www_bget?ko:K06467	Cell adhesion molecules;B cell receptor signaling pathway;Hematopoietic cell lineage	ko04514,ko04662,ko04640	-	-	sp|P35329|CD22_MOUSE;sp|P20273|CD22_HUMAN	B-cell receptor CD22 OS=Mus musculus OX=10090 GN=Cd22 PE=1 SV=1;B-cell receptor CD22 OS=Homo sapiens OX=9606 GN=CD22 PE=1 SV=2
gene4112	3026	7.36	5.67	4.75	0.79	0.82	2.3	-1.89437	1.95781e-06	3.29305e-05	dcun1d4	XP_010729302.3;XP_029988258.1	DCN1-like protein 4 isoform X1 [Larimichthys crocea];LOW QUALITY PROTEIN: DCN1-like protein 4 [Sphaeramia orbicularis]	-	-	K17824	DCUN1D4_5	http://www.genome.jp/dbget-bin/www_bget?ko:K17824	-	-	KOG3077	Uncharacterized conserved protein	sp|Q5RHX6|DCNL4_DANRE	DCN1-like protein 4 OS=Danio rerio OX=7955 GN=dcun1d4 PE=3 SV=2
gene6011	7093	5.75	3.74	1.66	0.93	0.56	1.27	-1.6113	0.000407114	0.00304622	atm	XP_027136366.1	serine-protein kinase ATM [Larimichthys crocea]	GO:0000723;GO:0005634;GO:0106311;GO:0016572;GO:0006281;GO:0106310;GO:0000077;GO:0005524	telomere maintenance;nucleus;protein serine/threonine kinase activity;histone phosphorylation;DNA repair;protein serine kinase activity;DNA damage checkpoint signaling;ATP binding	K04728	ATM,TEL1	http://www.genome.jp/dbget-bin/www_bget?ko:K04728	Apoptosis;Apoptosis - fly;Cell cycle;Cellular senescence;p53 signaling pathway;FoxO signaling pathway;NF-kappa B signaling pathway;Homologous recombination;MicroRNAs in cancer;Transcriptional misregulation in cancer;Platinum drug resistance;Shigellosis;Human T-cell leukemia virus 1 infection;Human immunodeficiency virus 1 infection;Human papillomavirus infection	ko04210,ko04214,ko04110,ko04218,ko04115,ko04068,ko04064,ko03440,ko05206,ko05202,ko01524,ko05131,ko05166,ko05170,ko05165	KOG0890	Protein kinase of the PI-3 kinase family involved in mitotic growth, DNA repair and meiotic recombination	sp|Q13315|ATM_HUMAN	Serine-protein kinase ATM OS=Homo sapiens OX=9606 GN=ATM PE=1 SV=4
gene15897	3619	1.68	6.06	3.64	0.25	0.75	0.69	-2.26938	0.000359558	0.00274528	atp2a3	KAE8287999.1	Sarcoplasmic/endoplasmic reticulum calcium ATPase 3 [Larimichthys crocea]	GO:0046872;GO:0033017;GO:0016021;GO:0005524;GO:0005388	metal ion binding;sarcoplasmic reticulum membrane;integral component of membrane;ATP binding;P-type calcium transporter activity	K05853	ATP2A	http://www.genome.jp/dbget-bin/www_bget?ko:K05853	Calcium signaling pathway;cAMP signaling pathway;cGMP-PKG signaling pathway;Arrhythmogenic right ventricular cardiomyopathy;Diabetic cardiomyopathy;Dilated cardiomyopathy;Hypertrophic cardiomyopathy;Alzheimer disease;Pathways of neurodegeneration - multiple diseases;Spinocerebellar ataxia;Adrenergic signaling in cardiomyocytes;Cardiac muscle contraction;Pancreatic secretion;Thyroid hormone signal…	ko04020,ko04024,ko04022,ko05412,ko05415,ko05414,ko05410,ko05010,ko05022,ko05017,ko04261,ko04260,ko04972,ko04919	KOG0202	Ca2+ transporting ATPase	sp|Q9YGL9|AT2A3_CHICK	Sarcoplasmic/endoplasmic reticulum calcium ATPase 3 OS=Gallus gallus OX=9031 GN=ATP2A3 PE=2 SV=2
gene8036	2179	0.65	1.35	0.83	0.05	0.05	0.15	-3.1506	0.00014365	0.001272	kcnk5	KAE8289594.1	Potassium channel subfamily K member 5 [Larimichthys crocea]	GO:0005267;GO:0016021	potassium channel activity;integral component of membrane	K04916	KCNK5,K2P5.1	http://www.genome.jp/dbget-bin/www_bget?ko:K04916	Protein digestion and absorption;Taste transduction	ko04974,ko04742	-	-	sp|O95279|KCNK5_HUMAN	Potassium channel subfamily K member 5 OS=Homo sapiens OX=9606 GN=KCNK5 PE=1 SV=1
gene4136	2080	24.35	30.07	9.54	2.51	0.74	2.14	-3.06363	3.19888e-09	1.14863e-07	paics	TMS20840.1;KAE8294528.1	Multifunctional protein ADE2 [Larimichthys crocea];Multifunctional protein ADE2 Phosphoribosylaminoimidazole-succinocarboxamide synthase [Larimichthys crocea]	GO:0006189;GO:0005524;GO:0004639;GO:0004638;GO:0043727	'de novo' IMP biosynthetic process;ATP binding;phosphoribosylaminoimidazolesuccinocarboxamide synthase activity;phosphoribosylaminoimidazole carboxylase activity;5-amino-4-imidazole carboxylate lyase activity	K01587	PAICS	http://www.genome.jp/dbget-bin/www_bget?ko:K01587	Purine metabolism	ko00230	KOG2835	Phosphoribosylamidoimidazole-succinocarboxamide synthase	sp|P38024|PUR6_CHICK	Multifunctional protein ADE2 OS=Gallus gallus OX=9031 GN=AIRC PE=2 SV=1
gene13970	1779	1.1	4.11	1.33	0.21	0.24	0.48	-2.43519	0.000651046	0.00450842	LOC104929711	XP_027132844.1	uncharacterized protein LOC104929711 [Larimichthys crocea]	-	-	-	-	-	-	-	-	-	sp|A6NEL2|SWAHB_HUMAN	Ankyrin repeat domain-containing protein SOWAHB OS=Homo sapiens OX=9606 GN=SOWAHB PE=1 SV=1
gene10369	1872	11.65	6.63	12.32	2.58	2.29	6.02	-1.20979	0.00531626	0.0254425	LOC104925853	KAE8279995.1	Beta,beta-carotene 15,15&apos;-dioxygenase [Larimichthys crocea]	GO:0004497;GO:0016702;GO:0046872;GO:0003834;GO:0001754;GO:0030902	monooxygenase activity;oxidoreductase activity, acting on single donors with incorporation of molecular oxygen, incorporation of two atoms of oxygen;metal ion binding;beta-carotene 15,15'-dioxygenase activity;eye photoreceptor cell differentiation;hindbrain development	K00515	BCMO1,BCDO1	http://www.genome.jp/dbget-bin/www_bget?ko:K00515	Retinol metabolism	ko00830	-	-	sp|Q9I993|BCDO1_CHICK	Beta,beta-carotene 15,15&apos;-dioxygenase OS=Gallus gallus OX=9031 GN=BCO1 PE=1 SV=1
gene10288	1379	7.14	19.94	5.68	1.59	0.95	5	-1.88584	0.00140362	0.00856763	LOC104925753	KAE8279374.1	Apolipoprotein L domain-containing protein 1 Vascular early response gene protein [Larimichthys crocea]	GO:0006869;GO:0042157;GO:0005576;GO:0008289	lipid transport;lipoprotein metabolic process;extracellular region;lipid binding	-	-	-	-	-	-	-	sp|Q9BWW8|APOL6_HUMAN	Apolipoprotein L6 OS=Homo sapiens OX=9606 GN=APOL6 PE=1 SV=1
gene18777	3420	0.73	1.81	0.9	0.3	0.15	0.25	-1.8801	0.00198254	0.0114337	LOC104934839	KAE8299757.1	Gap junction beta-6 protein Connexin-31 [Larimichthys crocea]	GO:0005243;GO:0048839;GO:0005922;GO:0007154;GO:0016021	gap junction channel activity;inner ear development;connexin complex;cell communication;integral component of membrane	K07621	GJB2,CX26	http://www.genome.jp/dbget-bin/www_bget?ko:K07621	-	-	-	-	sp|O93533|CXB6_CHICK	Gap junction beta-6 protein OS=Gallus gallus OX=9031 GN=GJB6 PE=2 SV=1
novel.13857	933	4.42	2.85	1.05	0.62	0	0.17	-2.91249	0.0050845	0.0245276	-	-	-	-	-	-	-	-	-	-	-	-	-	-
gene18925	1071	0.3	0.4	1.12	0	0	0	-5.2665	0.00430354	0.0214536	LOC104934998	XP_027146748.1	sodium- and chloride-dependent GABA transporter 3-like [Larimichthys crocea]	-	-	K05044	SLC6A11,GAT3	http://www.genome.jp/dbget-bin/www_bget?ko:K05044	GABAergic synapse;Synaptic vesicle cycle	ko04727,ko04721	KOG3660	Sodium-neurotransmitter symporter	sp|P31650|S6A11_MOUSE	Sodium- and chloride-dependent GABA transporter 3 OS=Mus musculus OX=10090 GN=Slc6a11 PE=1 SV=2
gene18043	3468	2.36	1.55	2.19	0.65	0.21	0.84	-1.47807	0.00278407	0.0150509	LOC104934048	XP_010747918.1;XP_019116129.1	fibroblast growth factor 18 isoform X4 [Larimichthys crocea];fibroblast growth factor 18 isoform X3 [Larimichthys crocea]	GO:0005576;GO:0005104;GO:0008543;GO:0008083	extracellular region;fibroblast growth factor receptor binding;fibroblast growth factor receptor signaling pathway;growth factor activity	K04358	FGF	http://www.genome.jp/dbget-bin/www_bget?ko:K04358	Regulation of actin cytoskeleton;Calcium signaling pathway;MAPK signaling pathway;PI3K-Akt signaling pathway;Rap1 signaling pathway;Ras signaling pathway;Chemical carcinogenesis - receptor activation;Pathways in cancer;Breast cancer;Gastric cancer;Melanoma	ko04810,ko04020,ko04010,ko04151,ko04015,ko04014,ko05207,ko05200,ko05224,ko05226,ko05218	-	-	sp|O76093|FGF18_HUMAN	Fibroblast growth factor 18 OS=Homo sapiens OX=9606 GN=FGF18 PE=1 SV=1
gene7854	1638	12.86	26.04	13.96	0.4	0.61	0.66	-4.734	6.77385e-21	2.26796e-18	tfap2a	XP_010734452.1;XP_019108580.1;TKS87910.1;XP_010734454.1;KAE8280001.1;XP_019108581.1	transcription factor AP-2-alpha isoform X3 [Larimichthys crocea];transcription factor AP-2-alpha isoform X2 [Larimichthys crocea];Transcription factor AP-2-alpha [Collichthys lucidus];transcription factor AP-2-alpha isoform X5 [Larimichthys crocea];Transcription factor AP-2-alpha [Larimichthys crocea];transcription factor AP-2-alpha isoform X4 [Larimichthys crocea]	GO:0003700;GO:0051216;GO:0030182;GO:0014032;GO:0035778;GO:0071698;GO:0007422;GO:0043049;GO:0005634;GO:0030902;GO:0060041;GO:0030318;GO:0048701;GO:0014036;GO:0000981;GO:0050935	DNA-binding transcription factor activity;cartilage development;neuron differentiation;neural crest cell development;pronephric nephron tubule epithelial cell differentiation;olfactory placode development;peripheral nervous system development;otic placode formation;nucleus;hindbrain development;retina development in camera-type eye;melanocyte differentiation;embryonic cranial skeleton morphogenes…	K09176	TFAP2A_B	http://www.genome.jp/dbget-bin/www_bget?ko:K09176	-	-	KOG3811	Transcription factor AP-2	sp|A1A4R9|AP2A_BOVIN	Transcription factor AP-2-alpha OS=Bos taurus OX=9913 GN=TFAP2A PE=2 SV=1
gene15672	854	15.06	30.01	9.73	1.32	1.17	3.07	-2.94621	2.51656e-08	7.15027e-07	LOC104931523	XP_010744844.1	dual specificity protein phosphatase 22-B [Larimichthys crocea]	GO:0008138	protein tyrosine/serine/threonine phosphatase activity	K14165	K14165	http://www.genome.jp/dbget-bin/www_bget?ko:K14165	-	-	KOG1716	Dual specificity phosphatase	sp|Q566R7|DS22B_DANRE	Dual specificity protein phosphatase 22-B OS=Danio rerio OX=7955 GN=dusp22b PE=2 SV=2
gene22381	2523	4.59	6.14	3.59	1.08	0.79	2.51	-1.41107	0.000449479	0.00331437	LOC104938651	KAE8281534.1	putative Dol-P-Glc:Glc(2)Man(9)GlcNAc(2)-PP-Dol alpha-1,2-glucosyltransferase [Larimichthys crocea]	GO:0006488;GO:0106073;GO:0016021	dolichol-linked oligosaccharide biosynthetic process;dolichyl pyrophosphate Glc2Man9GlcNAc2 alpha-1,2-glucosyltransferase activity;integral component of membrane	K03850	ALG10	http://www.genome.jp/dbget-bin/www_bget?ko:K03850	N-Glycan biosynthesis	ko00510	KOG2642	Alpha-1,2 glucosyltransferase/transcriptional activator	sp|O88788|AG10B_RAT	Putative Dol-P-Glc:Glc(2)Man(9)GlcNAc(2)-PP-Dol alpha-1,2-glucosyltransferase OS=Rattus norvegicus OX=10116 GN=Alg10b PE=1 SV=1
gene13581	2882	26.73	36.29	11.85	1.73	0.58	2.17	-3.71092	2.59191e-14	2.74433e-12	LOC104929288	XP_010742072.2	grainyhead-like protein 2 homolog [Larimichthys crocea]	-	-	K09275	TFCP2	http://www.genome.jp/dbget-bin/www_bget?ko:K09275	-	-	KOG4091	Transcription factor	sp|Q5M7R9|GRHL2_XENTR	Grainyhead-like protein 2 homolog OS=Xenopus tropicalis OX=8364 GN=grhl2 PE=2 SV=1
gene3081	1020	212	228.66	63.53	1.29	0.12	0.38	-8.05535	5.92174e-34	6.379e-31	LOC104917985	KAE8278306.1	Inosine-uridine preferring nucleoside hydrolase [Larimichthys crocea]	GO:0016021;GO:0016787	integral component of membrane;hydrolase activity	-	-	-	-	-	KOG2938	Predicted inosine-uridine preferring nucleoside hydrolase	sp|Q27546|IUNH_CRIFA;sp|P83851|IUNH_LEIMA	Inosine-uridine preferring nucleoside hydrolase OS=Crithidia fasciculata OX=5656 GN=IUNH PE=1 SV=3;Inosine-uridine preferring nucleoside hydrolase OS=Leishmania major OX=5664 GN=NSNH PE=1 SV=3
gene14617	3267	0.12	0.82	0.23	0	0.02	0	-5.45548	0.000577964	0.00408083	LOC104930389	XP_010743467.2;XP_010743466.2	band 3 anion exchange protein-like isoform X2 [Larimichthys crocea];band 3 anion exchange protein-like isoform X1 [Larimichthys crocea]	GO:0016021;GO:0015301;GO:0005452	integral component of membrane;anion:anion antiporter activity;inorganic anion exchanger activity	K06573	SLC4A1,AE1,CD233	http://www.genome.jp/dbget-bin/www_bget?ko:K06573	Collecting duct acid secretion	ko04966	-	-	sp|P32847|B3AT_ONCMY	Band 3 anion exchange protein OS=Oncorhynchus mykiss OX=8022 GN=slc4a1 PE=2 SV=2
novel.18880	810	12.07	22.97	8.18	0	2.71	4.07	-2.30025	0.0117294	0.047879	RTase	TKS65258.1	RNA-directed DNA polymerase from mobile element jockey [Collichthys lucidus]	GO:0003964;GO:0005576;GO:0005179	RNA-directed DNA polymerase activity;extracellular region;hormone activity	-	-	-	-	-	-	-	sp|Q95SX7|RTBS_DROME	Probable RNA-directed DNA polymerase from transposon BS OS=Drosophila melanogaster OX=7227 GN=RTase PE=2 SV=1
gene22465	4097	39.49	19.19	30.87	8.86	5.05	8.47	-1.54028	9.98087e-05	0.000938467	col6a3	XP_027146938.1	collagen alpha-3(VI) chain [Larimichthys crocea]	GO:0007155;GO:0005581;GO:0004867	cell adhesion;collagen trimer;serine-type endopeptidase inhibitor activity	K06238	COL6A	http://www.genome.jp/dbget-bin/www_bget?ko:K06238	Focal adhesion;PI3K-Akt signaling pathway;ECM-receptor interaction;Human papillomavirus infection;Protein digestion and absorption	ko04510,ko04151,ko04512,ko05165,ko04974	-	-	sp|P15989|CO6A3_CHICK	Collagen alpha-3(VI) chain OS=Gallus gallus OX=9031 GN=COL6A3 PE=2 SV=2
gene9916	2432	4.14	5.14	1.98	0.68	0.46	2.07	-1.56441	0.00257814	0.0141476	btk	XP_010737274.1;XP_010737276.1	tyrosine-protein kinase BTK isoform X1 [Larimichthys crocea];tyrosine-protein kinase BTK isoform X2 [Larimichthys crocea]	GO:0030178;GO:0046872;GO:0060828;GO:0002250;GO:0004715;GO:0009952;GO:0005524;GO:0035556;GO:0004714	negative regulation of Wnt signaling pathway;metal ion binding;regulation of canonical Wnt signaling pathway;adaptive immune response;non-membrane spanning protein tyrosine kinase activity;anterior/posterior pattern specification;ATP binding;intracellular signal transduction;transmembrane receptor protein tyrosine kinase activity	K07370	BTK	http://www.genome.jp/dbget-bin/www_bget?ko:K07370	NF-kappa B signaling pathway;Primary immunodeficiency;Epstein-Barr virus infection;Osteoclast differentiation;B cell receptor signaling pathway;Fc epsilon RI signaling pathway;Platelet activation	ko04064,ko05340,ko05169,ko04380,ko04662,ko04664,ko04611	-	-	sp|Q06187|BTK_HUMAN	Tyrosine-protein kinase BTK OS=Homo sapiens OX=9606 GN=BTK PE=1 SV=3
gene654	812	19.77	47.22	13.18	3.42	3.99	3.51	-2.3291	3.72642e-05	0.000408522	LOC104921809	XP_010732763.1	cornifelin homolog B [Larimichthys crocea]	-	-	-	-	-	-	-	-	-	sp|Q6DK99|CNFNB_XENLA	Cornifelin homolog B OS=Xenopus laevis OX=8355 GN=cnfn-b PE=3 SV=1
novel.8773	667	9.23	24.86	6.29	1.94	0.27	1.55	-3.02272	4.29576e-05	0.000458955	-	TMS15160.1	hypothetical protein E3U43_021622 [Larimichthys crocea]	-	-	-	-	-	-	-	-	-	-	-
gene19180	2982	11.21	9.36	7.42	2.45	1.79	4.05	-1.39301	1.39527e-05	0.000177187	LOC104935282	XP_019110024.2;XP_019110023.2	A-kinase anchor protein 9 isoform X7 [Larimichthys crocea];A-kinase anchor protein 9 isoform X6 [Larimichthys crocea]	GO:0060090;GO:0007165;GO:0005737;GO:0005815;GO:0003677	molecular adaptor activity;signal transduction;cytoplasm;microtubule organizing center;DNA binding	K16481	PCNT	http://www.genome.jp/dbget-bin/www_bget?ko:K16481	-	-	-	-	sp|O95613|PCNT_HUMAN	Pericentrin OS=Homo sapiens OX=9606 GN=PCNT PE=1 SV=4
gene16480	1414	20.41	16.55	7.58	0.76	0.33	1.13	-3.9426	2.30888e-15	3.30663e-13	foxq1	XP_010745910.1	forkhead box protein Q1 [Larimichthys crocea]	GO:0043565;GO:0005634;GO:0003700	sequence-specific DNA binding;nucleus;DNA-binding transcription factor activity	K09410	FOXQ,HFH1	http://www.genome.jp/dbget-bin/www_bget?ko:K09410	-	-	-	-	sp|Q63244|FOXQ1_RAT	Forkhead box protein Q1 OS=Rattus norvegicus OX=10116 GN=Foxq1 PE=1 SV=3
gene16717	2921	13.5	21.05	11.43	1.76	0.64	1.78	-3.0858	5.03139e-13	4.19723e-11	gnmt	XP_010746230.1	glycine N-methyltransferase [Larimichthys crocea]	GO:0032259;GO:0017174	methylation;glycine N-methyltransferase activity	K00552	GNMT	http://www.genome.jp/dbget-bin/www_bget?ko:K00552	Glycine, serine and threonine metabolism	ko00260	-	-	sp|P13255|GNMT_RAT	Glycine N-methyltransferase OS=Rattus norvegicus OX=10116 GN=Gnmt PE=1 SV=2
gene19796	3492	7.66	8.38	4.55	1.07	0.44	1.78	-2.3346	8.07933e-09	2.63477e-07	LOC104935942	XP_019119852.1;XP_019119858.1	pro-neuregulin-1, membrane-bound isoform isoform X1 [Larimichthys crocea];pro-neuregulin-1, membrane-bound isoform isoform X2 [Larimichthys crocea]	-	-	K05455	NRG1	http://www.genome.jp/dbget-bin/www_bget?ko:K05455	ErbB signaling pathway;EGFR tyrosine kinase inhibitor resistance;Amyotrophic lateral sclerosis	ko04012,ko01521,ko05014	-	-	sp|Q05199|NRG1_CHICK;sp|Q02297|NRG1_HUMAN	Pro-neuregulin-1, membrane-bound isoform OS=Gallus gallus OX=9031 GN=NRG1 PE=1 SV=1;Pro-neuregulin-1, membrane-bound isoform OS=Homo sapiens OX=9606 GN=NRG1 PE=1 SV=3
gene19012	1749	0.08	0.26	0.89	0	0	0.04	-4.64415	0.0093171	0.0398482	LOC104935103	XP_019117652.1	multidrug and toxin extrusion protein 1 [Larimichthys crocea]	-	-	K03327	TC.MATE,SLC47A,norM,mdtK,dinF	http://www.genome.jp/dbget-bin/www_bget?ko:K03327	-	-	KOG1347	Uncharacterized membrane protein, predicted efflux pump	sp|A1L1P9|S47A1_DANRE	Multidrug and toxin extrusion protein 1 OS=Danio rerio OX=7955 GN=slc47a1 PE=2 SV=1
gene13978	1474	14.29	27.58	9.17	1.37	0.68	0.84	-3.6166	4.61183e-11	2.46788e-09	LOC104929704	XP_027132843.1	GTPase IMAP family member 7-like [Larimichthys crocea]	GO:0005525	GTP binding	-	-	-	-	-	-	-	sp|Q8NHV1|GIMA7_HUMAN	GTPase IMAP family member 7 OS=Homo sapiens OX=9606 GN=GIMAP7 PE=1 SV=1
gene22394	1365	22.78	23.33	12.8	2.56	1.62	2.61	-2.73823	1.7757e-11	1.06783e-09	LOC104938667	XP_027136893.1	arrestin domain-containing protein 3 isoform X2 [Larimichthys crocea]	-	-	-	-	-	-	-	KOG3780	Thioredoxin binding protein TBP-2/VDUP1	sp|Q0VCA2|ARRD3_BOVIN;sp|Q6TXF1|ARRD3_RAT	Arrestin domain-containing protein 3 OS=Bos taurus OX=9913 GN=ARRDC3 PE=2 SV=1;Arrestin domain-containing protein 3 OS=Rattus norvegicus OX=10116 GN=Arrdc3 PE=2 SV=1
gene15073	5504	1.12	1.68	0.73	0.25	0.21	0.53	-1.51575	0.00130911	0.00809444	akna	XP_027134409.1;XP_027134410.1	AT-hook-containing transcription factor isoform X3 [Larimichthys crocea];AT-hook-containing transcription factor isoform X4 [Larimichthys crocea]	-	-	K21404	AKNA	http://www.genome.jp/dbget-bin/www_bget?ko:K21404	-	-	-	-	sp|Q7Z591|AKNA_HUMAN	Microtubule organization protein AKNA OS=Homo sapiens OX=9606 GN=AKNA PE=1 SV=2
gene10892	1059	2.65	8.15	6.5	0	0	0.21	-6.15441	2.57272e-08	7.2932e-07	LOC104926407	TMS11562.1	Collagen alpha-1(XXVIII) chain [Larimichthys crocea]	GO:0007155;GO:0005581;GO:0004867	cell adhesion;collagen trimer;serine-type endopeptidase inhibitor activity	K23619	COL28A	http://www.genome.jp/dbget-bin/www_bget?ko:K23619	Protein digestion and absorption	ko04974	-	-	sp|Q2UY11|COSA1_MOUSE	Collagen alpha-1(XXVIII) chain OS=Mus musculus OX=10090 GN=Col28a1 PE=2 SV=1
gene16206	655	41.22	8.03	12.08	0.53	0.27	1.16	-4.63798	2.97232e-09	1.0735e-07	LOC104932097	TMS06464.1	Augurin-B [Larimichthys crocea]	GO:0005737;GO:0016324;GO:0005576	cytoplasm;apical plasma membrane;extracellular region	-	-	-	-	-	-	-	sp|Q566V9|AUGNA_DANRE	Augurin-A OS=Danio rerio OX=7955 GN=ecrg4a PE=2 SV=2
gene19715	5792	0.18	0.39	0.3	0.03	0.03	0.03	-2.90479	0.000561139	0.00398475	LOC104935858	XP_027138823.1	receptor-type tyrosine-protein phosphatase delta isoform X5 [Larimichthys crocea]	-	-	K06777	PTPRD	http://www.genome.jp/dbget-bin/www_bget?ko:K06777	-	-	-	-	sp|Q64487|PTPRD_MOUSE	Receptor-type tyrosine-protein phosphatase delta OS=Mus musculus OX=10090 GN=Ptprd PE=1 SV=3
gene16583	2164	1.79	2.87	0.58	0.14	0.06	0.24	-3.30399	2.18948e-05	0.00026111	LOC104932509	KAE8284036.1	Centrosomal protein of 55 kDa [Larimichthys crocea]	GO:0051896;GO:0014066;GO:1904888;GO:0005737;GO:0021549;GO:0000281	regulation of protein kinase B signaling;regulation of phosphatidylinositol 3-kinase signaling;cranial skeletal system development;cytoplasm;cerebellum development;mitotic cytokinesis	K16456	CEP55	http://www.genome.jp/dbget-bin/www_bget?ko:K16456	-	-	-	-	sp|Q502I3|CEP55_DANRE	Centrosomal protein of 55 kDa OS=Danio rerio OX=7955 GN=cep55 PE=2 SV=1
novel.21083	1280	2.61	4.75	5.05	1.09	0.91	1.67	-1.40637	0.00735708	0.0329678	-	XP_027129567.1	G-protein coupled receptor 4-like, partial [Larimichthys crocea]	-	-	-	-	-	-	-	-	-	-	-
gene10257	1089	10.34	10.96	5.87	2.73	2.25	5.33	-1.04359	0.011068	0.045757	tmem159	XP_010737712.1;XP_010737711.3;XP_010737709.1	promethin isoform X4 [Larimichthys crocea];promethin isoform X2 [Larimichthys crocea];promethin isoform X1 [Larimichthys crocea]	GO:0005811;GO:0005789;GO:0016021	lipid droplet;endoplasmic reticulum membrane;integral component of membrane	-	-	-	-	-	-	-	sp|Q96B96|LDAF1_HUMAN	Lipid droplet assembly factor 1 OS=Homo sapiens OX=9606 GN=TMEM159 PE=1 SV=2
gene3291	5321	9.89	16.74	10.73	0.91	0.78	1.3	-3.23995	1.57046e-19	4.32331e-17	jag1	XP_027133846.1	protein jagged-1 [Larimichthys crocea]	GO:0007275;GO:0016021;GO:0007219;GO:0005112;GO:0005509	multicellular organism development;integral component of membrane;Notch signaling pathway;Notch binding;calcium ion binding	K06052	JAG1,CD339	http://www.genome.jp/dbget-bin/www_bget?ko:K06052	Apelin signaling pathway;Notch signaling pathway;TNF signaling pathway;Chemical carcinogenesis - receptor activation;Pathways in cancer;Breast cancer;Endocrine resistance;Human papillomavirus infection;Th1 and Th2 cell differentiation	ko04371,ko04330,ko04668,ko05207,ko05200,ko05224,ko01522,ko05165,ko04658	-	-	sp|Q90Y54|JAG1B_DANRE	Protein jagged-1b OS=Danio rerio OX=7955 GN=jag1b PE=2 SV=1
gene324	2236	1.48	2.55	0.92	0.34	0.08	0.34	-2.33296	0.000501399	0.00362917	LOC104918142	KAE8278990.1	RING finger protein B [Larimichthys crocea]	-	-	-	-	-	-	-	-	-	sp|Q9MA55|ACBP4_ARATH	Acyl-CoA-binding domain-containing protein 4 OS=Arabidopsis thaliana OX=3702 GN=ACBP4 PE=1 SV=1
gene5251	2566	0.25	0.38	0.16	0	0	0	-5.43329	0.00159483	0.00952363	LOC104920313	XP_010730846.3;KAE8292175.1	eosinophil peroxidase [Larimichthys crocea];Myeloperoxidase [Larimichthys crocea]	GO:0006979;GO:0020037;GO:0006952;GO:0004601	response to oxidative stress;heme binding;defense response;peroxidase activity	K10788	EPX,EPO	http://www.genome.jp/dbget-bin/www_bget?ko:K10788	Asthma	ko05310	KOG2408	Peroxidase/oxygenase	sp|P11678|PERE_HUMAN	Eosinophil peroxidase OS=Homo sapiens OX=9606 GN=EPX PE=1 SV=2
novel.14958	765	5.93	17.83	1.82	0.21	0.11	0.45	-4.69139	1.36292e-06	2.41026e-05	-	XP_038582294.1	uncharacterized protein LOC119908581 [Micropterus salmoides]	-	-	-	-	-	-	-	-	-	-	-
novel.15175	934	3.24	5.37	3.34	1.09	0.56	0.84	-1.82516	0.00299259	0.0159691	-	TKS71595.1	hypothetical protein D9C73_004953 [Collichthys lucidus]	GO:0042981	regulation of apoptotic process	-	-	-	-	-	-	-	-	-
gene10105	1803	1.51	1.97	0.81	0.24	0.03	0.22	-2.76688	0.000365554	0.00277904	fbxo5	XP_010737522.3	F-box only protein 5 [Larimichthys crocea]	GO:0046872;GO:0016567;GO:0051301	metal ion binding;protein ubiquitination;cell division	K10292	FBXO5,EMI1	http://www.genome.jp/dbget-bin/www_bget?ko:K10292	Oocyte meiosis	ko04114	-	-	sp|Q0V967|FBX5_DANRE	F-box only protein 5 OS=Danio rerio OX=7955 GN=fbxo5 PE=1 SV=2
gene20839	1274	41.59	51.66	22.48	7.62	9.36	19.12	-1.31217	0.00103656	0.00664641	LOC104937019	XP_038566474.1;QHQ71228.1;XP_038566506.1	LOW QUALITY PROTEIN: NACHT, LRR and PYD domains-containing protein 12-like, partial [Micropterus salmoides];NLR-c18 [Scophthalmus maximus];NLR family CARD domain-containing protein 3-like, partial [Micropterus salmoides]	GO:0046872	metal ion binding	-	-	-	-	-	-	-	sp|P10775|RINI_PIG;sp|P13489|RINI_HUMAN;sp|P59047|NALP5_HUMAN	Ribonuclease inhibitor OS=Sus scrofa OX=9823 GN=RNH1 PE=1 SV=1;Ribonuclease inhibitor OS=Homo sapiens OX=9606 GN=RNH1 PE=1 SV=2;NACHT, LRR and PYD domains-containing protein 5 OS=Homo sapiens OX=9606 GN=NLRP5 PE=1 SV=2
gene9738	2813	6.57	12.35	6.46	0.99	0.32	1.85	-2.72705	2.66089e-08	7.51723e-07	slc46a3	TMS14147.1	Solute carrier family 46 member 3 [Larimichthys crocea]	GO:0022857;GO:0016021	transmembrane transporter activity;integral component of membrane	K20840	SLC46A3	http://www.genome.jp/dbget-bin/www_bget?ko:K20840	-	-	KOG2816	Predicted transporter ADD1 (major facilitator superfamily)	sp|Q5F4B8|S46A3_CHICK	Solute carrier family 46 member 3 OS=Gallus gallus OX=9031 GN=SLC46A3 PE=2 SV=1
gene23355	1279	9.62	8.34	7.35	0.92	1.3	0.94	-2.4845	8.23092e-07	1.543e-05	LOC104939689	XP_027128048.1	histone H1-like [Larimichthys crocea]	GO:0000786;GO:0006334;GO:0005634;GO:0003677	nucleosome;nucleosome assembly;nucleus;DNA binding	K11275	H1_5	http://www.genome.jp/dbget-bin/www_bget?ko:K11275	-	-	-	-	sp|P06350|H1_ONCMY	Histone H1 OS=Oncorhynchus mykiss OX=8022 PE=1 SV=2
gene15919	3934	2.14	3.17	2.12	0.82	0.5	1.53	-1.07265	0.00690179	0.0313587	prdm15	KAE8288022.1	hypothetical protein D5F01_LYC14082 [Larimichthys crocea]	GO:0032259;GO:0008168	methylation;methyltransferase activity	K24647	PRDM15	http://www.genome.jp/dbget-bin/www_bget?ko:K24647	-	-	-	-	sp|E9Q8T2|PRD15_MOUSE	PR domain zinc finger protein 15 OS=Mus musculus OX=10090 GN=Prdm15 PE=1 SV=1
gene14064	1163	6.16	15.5	7.32	1.78	1.37	4.95	-1.57396	0.00206083	0.0117811	LOC104929808	XP_027140565.1	uncharacterized protein LOC104929808 [Larimichthys crocea]	GO:0002250;GO:0038023;GO:0016021	adaptive immune response;signaling receptor activity;integral component of membrane	K06457	CD7	http://www.genome.jp/dbget-bin/www_bget?ko:K06457	Hematopoietic cell lineage	ko04640	-	-	-	-
gene21647	3308	3.4	7.44	2.69	0.53	0.43	1.38	-2.22709	7.93055e-06	0.000109099	LOC104937883	XP_027139377.1	E3 ubiquitin-protein ligase TRIM39 [Larimichthys crocea]	GO:0008270	zinc ion binding	-	-	-	-	-	-	-	sp|P14373|TRI27_HUMAN	Zinc finger protein RFP OS=Homo sapiens OX=9606 GN=TRIM27 PE=1 SV=1
gene3742	2055	0.77	1.44	0.48	0	0	0.09	-5.0072	0.000178266	0.00152248	LOC104918703	KAE8283356.1	Lipopolysaccharide-induced tumor necrosis factor-alpha factor [Larimichthys crocea]	GO:0046872;GO:0005765;GO:0016021	metal ion binding;lysosomal membrane;integral component of membrane	K19363	LITAF	http://www.genome.jp/dbget-bin/www_bget?ko:K19363	Lysosome	ko04142	-	-	sp|Q8QGW7|LITAF_CHICK	Lipopolysaccharide-induced tumor necrosis factor-alpha factor homolog OS=Gallus gallus OX=9031 GN=LITAF PE=2 SV=1
gene20105	8869	3.07	3.25	0.93	0.24	0.04	0.15	-3.63016	8.55761e-09	2.76793e-07	aspm	XP_010750589.3	abnormal spindle-like microcephaly-associated protein [Larimichthys crocea]	GO:0005634;GO:0005737;GO:0007051	nucleus;cytoplasm;spindle organization	K16743	ASPM,ASP	http://www.genome.jp/dbget-bin/www_bget?ko:K16743	-	-	KOG0165	Microtubule-associated protein Asp	sp|Q8CJ27|ASPM_MOUSE	Abnormal spindle-like microcephaly-associated protein homolog OS=Mus musculus OX=10090 GN=Aspm PE=1 SV=2
gene16895	948	58.41	90.55	24.53	0.15	0.47	0.5	-6.83127	9.28268e-26	5.47589e-23	LOC104932843	XP_019131767.2	complement C1q-like protein 4 [Larimichthys crocea]	-	-	K23284	C1QL	http://www.genome.jp/dbget-bin/www_bget?ko:K23284	-	-	-	-	sp|Q86Z23|C1QL4_HUMAN	Complement C1q-like protein 4 OS=Homo sapiens OX=9606 GN=C1QL4 PE=1 SV=1
gene23199	811	3.1	5.2	3.33	0.48	0.78	0.52	-2.20786	0.00208793	0.0119085	LOC104939523	KAE8299936.1	3-oxo-5-alpha-steroid 4-dehydrogenase 2 [Larimichthys crocea]	GO:0003865;GO:0016021;GO:0047751;GO:0007548;GO:0005783;GO:0008202	3-oxo-5-alpha-steroid 4-dehydrogenase activity;integral component of membrane;cholestenone 5-alpha-reductase activity;sex differentiation;endoplasmic reticulum;steroid metabolic process	K12344	SRD5A2	http://www.genome.jp/dbget-bin/www_bget?ko:K12344	Prostate cancer;Steroid hormone biosynthesis	ko05215,ko00140	KOG1638	Steroid reductase	sp|O18765|S5A2_PIG	3-oxo-5-alpha-steroid 4-dehydrogenase 2 OS=Sus scrofa OX=9823 GN=SRD5A2 PE=2 SV=2
gene4717	1754	9.85	19.84	6.15	2.13	1.55	5.1	-1.77087	0.000306713	0.00239975	lpar6	XP_010730123.1	lysophosphatidic acid receptor 6 [Larimichthys crocea]	GO:0004930;GO:0016021	G protein-coupled receptor activity;integral component of membrane	K04273	LPAR6,P2RY5	http://www.genome.jp/dbget-bin/www_bget?ko:K04273	PI3K-Akt signaling pathway;Phospholipase D signaling pathway;Neuroactive ligand-receptor interaction;Pathways in cancer	ko04151,ko04072,ko04080,ko05200	-	-	sp|Q4G072|LPAR6_RAT	Lysophosphatidic acid receptor 6 OS=Rattus norvegicus OX=10116 GN=Lpar6 PE=2 SV=1
gene4457	1130	4.23	9.1	2.42	1.44	0.55	1.3	-1.82933	0.00369956	0.018993	marveld3	XP_010729788.2	MARVEL domain-containing protein 3 [Larimichthys crocea]	GO:0016021	integral component of membrane	K21099	MARVELD3	http://www.genome.jp/dbget-bin/www_bget?ko:K21099	Tight junction	ko04530	-	-	sp|Q96A59|MALD3_HUMAN	MARVEL domain-containing protein 3 OS=Homo sapiens OX=9606 GN=MARVELD3 PE=2 SV=3
gene13900	5709	2.07	3.77	1.96	0.34	0.71	1.07	-1.47995	0.00262381	0.0143441	myo10	XP_027146284.1;XP_027146285.1	unconventional myosin-X isoform X1 [Larimichthys crocea];unconventional myosin-X isoform X2 [Larimichthys crocea]	GO:0016459;GO:0003779;GO:0003774;GO:0007165;GO:0005524;GO:0005737	myosin complex;actin binding;cytoskeletal motor activity;signal transduction;ATP binding;cytoplasm	K12559	MYO10	http://www.genome.jp/dbget-bin/www_bget?ko:K12559	Pathogenic Escherichia coli infection;Fc gamma R-mediated phagocytosis	ko05130,ko04666	KOG4229	Myosin VII, myosin IXB and related myosins	sp|Q9HD67|MYO10_HUMAN	Unconventional myosin-X OS=Homo sapiens OX=9606 GN=MYO10 PE=1 SV=3
gene8511	2706	1.91	3.35	2.17	0.13	0.59	0.41	-2.12886	0.00107248	0.00683779	nfatc2	XP_019124339.2;XP_010735379.3	nuclear factor of activated T-cells, cytoplasmic 2 isoform X3 [Larimichthys crocea];nuclear factor of activated T-cells, cytoplasmic 2 isoform X2 [Larimichthys crocea]	GO:0005634;GO:0003700;GO:0003677	nucleus;DNA-binding transcription factor activity;DNA binding	K17332	NFATC2,NFAT1,NFATP	http://www.genome.jp/dbget-bin/www_bget?ko:K17332	Cellular senescence;VEGF signaling pathway;Wnt signaling pathway;cGMP-PKG signaling pathway;PD-L1 expression and PD-1 checkpoint pathway in cancer;Lipid and atherosclerosis;Yersinia infection;Hepatitis B;Human T-cell leukemia virus 1 infection;Human cytomegalovirus infection;Human immunodeficiency virus 1 infection;Kaposi sarcoma-associated herpesvirus infection;Axon guidance;Osteoclast different…	ko04218,ko04370,ko04310,ko04022,ko05235,ko05417,ko05135,ko05161,ko05166,ko05163,ko05170,ko05167,ko04360,ko04380,ko04921,ko04662,ko04625,ko04650,ko04660,ko04658,ko04659	-	-	sp|Q60591|NFAC2_MOUSE	Nuclear factor of activated T-cells, cytoplasmic 2 OS=Mus musculus OX=10090 GN=Nfatc2 PE=1 SV=3
gene19511	1783	8.17	18.74	4.71	1.44	1.01	3.41	-2.11994	8.42381e-05	0.000810203	sh3yl1	XP_027147356.1	SH3 domain-containing YSC84-like protein 1 isoform X1 [Larimichthys crocea]	-	-	K20523	SH3YL1	http://www.genome.jp/dbget-bin/www_bget?ko:K20523	-	-	KOG1843	Uncharacterized conserved protein	sp|Q3SZ01|SH3Y1_BOVIN	SH3 domain-containing YSC84-like protein 1 OS=Bos taurus OX=9913 GN=SH3YL1 PE=2 SV=1
gene15671	3300	10.1	12.91	6.81	3.02	1.57	6.18	-1.25954	0.0012801	0.00794883	ripk1	KAE8290861.1	Receptor-interacting serine/threonine-protein kinase 1 [Larimichthys crocea]	GO:0012501;GO:0005524;GO:0007165;GO:0004672	programmed cell death;ATP binding;signal transduction;protein kinase activity	K02861	RIPK1,RIP1	http://www.genome.jp/dbget-bin/www_bget?ko:K02861	Apoptosis;Necroptosis;NF-kappa B signaling pathway;TNF signaling pathway;Alcoholic liver disease;Pathogenic Escherichia coli infection;Salmonella infection;Shigellosis;Epstein-Barr virus infection;Hepatitis C;Human cytomegalovirus infection;Human immunodeficiency virus 1 infection;Cytosolic DNA-sensing pathway;NOD-like receptor signaling pathway;RIG-I-like receptor signaling pathway;Toll-like rec…	ko04210,ko04217,ko04064,ko04668,ko04936,ko05130,ko05132,ko05131,ko05169,ko05160,ko05163,ko05170,ko04623,ko04621,ko04622,ko04620	-	-	sp|Q13546|RIPK1_HUMAN;sp|Q60855|RIPK1_MOUSE	Receptor-interacting serine/threonine-protein kinase 1 OS=Homo sapiens OX=9606 GN=RIPK1 PE=1 SV=3;Receptor-interacting serine/threonine-protein kinase 1 OS=Mus musculus OX=10090 GN=Ripk1 PE=1 SV=1
gene1017	1931	51.16	25.77	16.66	1.54	1.73	3.88	-3.3209	1.64691e-13	1.50567e-11	LOC104925765	XP_010737771.1	mitogen-activated protein kinase 14A [Larimichthys crocea]	GO:0106311;GO:0106310;GO:0004707;GO:0005524	protein serine/threonine kinase activity;protein serine kinase activity;MAP kinase activity;ATP binding	K04441	P38	http://www.genome.jp/dbget-bin/www_bget?ko:K04441	Cellular senescence;Oocyte meiosis;Signaling pathways regulating pluripotency of stem cells;FoxO signaling pathway;MAPK signaling pathway;MAPK signaling pathway - fly;Rap1 signaling pathway;Sphingolipid signaling pathway;TNF signaling pathway;VEGF signaling pathway;Chemical carcinogenesis - reactive oxygen species;PD-L1 expression and PD-1 checkpoint pathway in cancer;Proteoglycans in cancer;Diab…	ko04218,ko04114,ko04550,ko04068,ko04010,ko04013,ko04015,ko04071,ko04668,ko04370,ko05208,ko05235,ko05205,ko05415,ko05418,ko05417,ko01522,ko04933,ko04936,ko04932,ko05120,ko05130,ko05133,ko05132,ko05131,ko05152,ko05135,ko05142,ko05140,ko05145,ko05171,ko05169,ko05161,ko05163,ko05170,ko05167,ko05014,ko05022,ko05020,ko04212,ko04261,ko04361,ko04380,ko04912,ko04935,ko04914,ko04917,ko04926,ko04714,ko04625…	KOG0660	Mitogen-activated protein kinase	sp|Q90336|MK14A_CYPCA;sp|Q63538|MK12_RAT	Mitogen-activated protein kinase 14A OS=Cyprinus carpio OX=7962 GN=mapk14a PE=1 SV=1;Mitogen-activated protein kinase 12 OS=Rattus norvegicus OX=10116 GN=Mapk12 PE=1 SV=1
gene16005	3654	0.37	0.86	0.48	0.03	0.03	0.08	-3.28075	7.67212e-05	0.000750686	LOC104931883	XP_010745295.1;XP_010745294.1;XP_010745293.1	protocadherin-10 isoform X3 [Larimichthys crocea];protocadherin-10 isoform X2 [Larimichthys crocea];protocadherin-10 isoform X1 [Larimichthys crocea]	GO:0007156;GO:0005509;GO:0016021;GO:0005886	homophilic cell adhesion via plasma membrane adhesion molecules;calcium ion binding;integral component of membrane;plasma membrane	K16499	PCDHD2	http://www.genome.jp/dbget-bin/www_bget?ko:K16499	-	-	-	-	sp|Q9P2E7|PCD10_HUMAN	Protocadherin-10 OS=Homo sapiens OX=9606 GN=PCDH10 PE=1 SV=2
gene12261	2935	36.12	51.44	25.28	1.78	2	2.67	-3.67019	2.65117e-22	1.02633e-19	plekhs1	XP_010740370.3	pleckstrin homology domain-containing family S member 1 [Larimichthys crocea]	-	-	-	-	-	-	-	-	-	sp|Q8BW88|PKHS1_MOUSE	Pleckstrin homology domain-containing family S member 1 OS=Mus musculus OX=10090 GN=Plekhs1 PE=2 SV=2
gene8365	2958	0.07	1.02	0.23	0	0	0	-6.4445	0.000171578	0.00147451	LOC104923712	KAE8281399.1	Collagen alpha-1(XIV) chain Undulin Precursor [Larimichthys crocea]	GO:0005581	collagen trimer	K16628	COL7A	http://www.genome.jp/dbget-bin/www_bget?ko:K16628	Protein digestion and absorption	ko04974	-	-	sp|P13944|COCA1_CHICK	Collagen alpha-1(XII) chain OS=Gallus gallus OX=9031 GN=COL12A1 PE=1 SV=3
gene20880	1882	3.54	5.65	2.12	0.3	0.72	0.7	-1.96943	0.00175602	0.0103392	LOC104937059	XP_010751506.3	sodium-dependent phosphate transporter 1-A [Larimichthys crocea]	GO:0006817;GO:0005315;GO:0016021;GO:0015293	phosphate ion transport;inorganic phosphate transmembrane transporter activity;integral component of membrane;symporter activity	K14640	SLC20A,PIT	http://www.genome.jp/dbget-bin/www_bget?ko:K14640	-	-	-	-	sp|Q6NV12|S20AA_DANRE	Sodium-dependent phosphate transporter 1-A OS=Danio rerio OX=7955 GN=slc20a1a PE=2 SV=1
gene10806	2537	8.02	11.59	9.2	2.27	2.27	2.2	-1.67076	1.89508e-05	0.000230729	LOC104926315	XP_027146652.1;XP_027146649.1	cohesin subunit SA-2 isoform X2 [Larimichthys crocea];cohesin subunit SA-2 isoform X1 [Larimichthys crocea]	-	-	K06671	STAG1_2,SCC3,IRR1	http://www.genome.jp/dbget-bin/www_bget?ko:K06671	Cell cycle	ko04110	KOG2011	Sister chromatid cohesion complex Cohesin, subunit STAG/IRR1/SCC3	sp|Q8N3U4|STAG2_HUMAN;sp|O35638|STAG2_MOUSE;sp|Q9DGN0|STAG2_XENLA	Cohesin subunit SA-2 OS=Homo sapiens OX=9606 GN=STAG2 PE=1 SV=3;Cohesin subunit SA-2 OS=Mus musculus OX=10090 GN=Stag2 PE=1 SV=3;Cohesin subunit SA-2 OS=Xenopus laevis OX=8355 GN=stag2 PE=1 SV=1
gene5323	5380	10.58	13.99	8.56	0.69	0.53	1.02	-3.48133	4.2796e-22	1.58256e-19	col16a1	XP_027141935.1;XP_027141933.1;TKS88616.1	collagen alpha-1(XVI) chain isoform X3 [Larimichthys crocea];collagen alpha-1(XVI) chain isoform X1 [Larimichthys crocea];Collagen alpha-1(XVI) chain [Collichthys lucidus]	GO:0005581	collagen trimer	K24339	COL16A	http://www.genome.jp/dbget-bin/www_bget?ko:K24339	Protein digestion and absorption	ko04974	-	-	sp|Q07092|COGA1_HUMAN	Collagen alpha-1(XVI) chain OS=Homo sapiens OX=9606 GN=COL16A1 PE=1 SV=2
gene4903	4541	1.22	0.71	0.76	0.08	0.27	0.29	-1.6057	0.0107214	0.0445971	LOC104919954	TMS19489.1	Collagen alpha-1(II) chain, partial [Larimichthys crocea]	GO:0005581;GO:0046872;GO:0005201	collagen trimer;metal ion binding;extracellular matrix structural constituent	K19719	COL2A	http://www.genome.jp/dbget-bin/www_bget?ko:K19719	Focal adhesion;PI3K-Akt signaling pathway;ECM-receptor interaction;Human papillomavirus infection;Protein digestion and absorption	ko04510,ko04151,ko04512,ko05165,ko04974	-	-	sp|P02460|CO2A1_CHICK	Collagen alpha-1(II) chain (Fragment) OS=Gallus gallus OX=9031 GN=COL2A1 PE=2 SV=2
novel.2162	646	620.31	1379.08	329.8	14.34	8.16	17.68	-5.42361	3.91795e-27	2.489e-24	-	KAE8295531.1	P2X purinoceptor 5 [Larimichthys crocea]	GO:0001614;GO:0005524;GO:0033198;GO:0098794;GO:0004931;GO:0005887	purinergic nucleotide receptor activity;ATP binding;response to ATP;postsynapse;extracellularly ATP-gated cation channel activity;integral component of plasma membrane	K06846	LY6D_E_F_G6_H	http://www.genome.jp/dbget-bin/www_bget?ko:K06846	-	-	-	-	-	-
gene16289	6171	1.87	2.12	1.37	0.52	0.16	0.6	-1.73336	0.000137737	0.00122887	gli3	XP_019131796.1	transcriptional activator GLI3 [Larimichthys crocea]	GO:0005737;GO:0009952;GO:0009953;GO:0005634;GO:0048568;GO:0000977;GO:0006357;GO:0046872;GO:0007224	cytoplasm;anterior/posterior pattern specification;dorsal/ventral pattern formation;nucleus;embryonic organ development;RNA polymerase II transcription regulatory region sequence-specific DNA binding;regulation of transcription by RNA polymerase II;metal ion binding;smoothened signaling pathway	K06230	GLI3	http://www.genome.jp/dbget-bin/www_bget?ko:K06230	Hedgehog signaling pathway;cAMP signaling pathway;Pathways in cancer;Basal cell carcinoma	ko04340,ko04024,ko05200,ko05217	KOG1721	FOG: Zn-finger	sp|P10071|GLI3_HUMAN	Transcriptional activator GLI3 OS=Homo sapiens OX=9606 GN=GLI3 PE=1 SV=6
novel.4946	2035	2.76	1.53	1.61	0.18	0.09	0.35	-2.95698	3.43845e-06	5.35456e-05	-	TSK13245.1	hypothetical protein Baya_0119 [Bagarius yarrelli]	-	-	-	-	-	-	-	-	-	-	-
gene13510	871	61.03	187.9	19.26	7.96	3.12	5.85	-3.50294	4.02211e-07	8.33905e-06	LOC104929209	KAE8283874.1	DELTA-thalatoxin-Avl1a [Larimichthys crocea]	GO:0005886;GO:0015267;GO:0052331;GO:0046930;GO:0044218;GO:0046931;GO:0006812	plasma membrane;channel activity;hemolysis in other organism involved in symbiotic interaction;pore complex;other organism cell membrane;pore complex assembly;cation transport	-	-	-	-	-	-	-	sp|Q5R231|ACTP1_ACTVL	DELTA-thalatoxin-Avl1a OS=Actineria villosa OX=227975 PE=1 SV=1
gene7660	2576	13.56	16.76	7.29	2.48	1.88	4.33	-1.72291	7.10746e-06	9.96573e-05	traf3ip2	KAE8287167.1	Adapter protein CIKS Connection to IKK and SAPK/JNK Nuclear factor NF-kappa-B activator 1 [Larimichthys crocea]	-	-	K21124	TRAF3IP2,ACT1	http://www.genome.jp/dbget-bin/www_bget?ko:K21124	Cellular senescence;IL-17 signaling pathway	ko04218,ko04657	-	-	sp|Q8N7N6|CIKS_MOUSE	E3 ubiquitin ligase TRAF3IP2 OS=Mus musculus OX=10090 GN=Traf3ip2 PE=1 SV=1
gene746	3607	4.25	4.53	2.24	1.04	0.63	1.34	-1.47783	0.000265624	0.00211952	cmtm4	XP_010733937.1	CKLF-like MARVEL transmembrane domain-containing protein 4 [Larimichthys crocea]	GO:0016021	integral component of membrane	-	-	-	-	-	-	-	sp|Q8CJ61|CKLF4_MOUSE	CKLF-like MARVEL transmembrane domain-containing protein 4 OS=Mus musculus OX=10090 GN=Cmtm4 PE=1 SV=1
gene1441	2308	0.09	0.61	0.41	0	0	0	-5.83393	0.000740298	0.00503062	chat	XP_010743452.3	choline O-acetyltransferase [Larimichthys crocea]	GO:0016746	acyltransferase activity	K00623	CHAT	http://www.genome.jp/dbget-bin/www_bget?ko:K00623	Glycerophospholipid metabolism;Cholinergic synapse	ko00564,ko04725	-	-	sp|B2ZGJ1|CLAT_DANRE	Choline O-acetyltransferase OS=Danio rerio OX=7955 GN=chat PE=2 SV=1
gene7469	2356	10.04	9.76	7.52	1.33	1.25	4.14	-1.7313	9.3258e-06	0.000125234	sh2d5	XP_019114460.2;XP_033481572.1	SH2 domain-containing protein 5 isoform X2 [Larimichthys crocea];SH2 domain-containing protein 5 isoform X2 [Epinephelus lanceolatus]	-	-	K23701	SH2D5	http://www.genome.jp/dbget-bin/www_bget?ko:K23701	-	-	-	-	sp|Q8JZW5|SH2D5_MOUSE;sp|Q6ZV89|SH2D5_HUMAN	SH2 domain-containing protein 5 OS=Mus musculus OX=10090 GN=Sh2d5 PE=1 SV=3;SH2 domain-containing protein 5 OS=Homo sapiens OX=9606 GN=SH2D5 PE=1 SV=2
gene19646	1135	7.93	9.42	4.57	1.79	0.85	4.53	-1.36143	0.00782102	0.0346152	LOC104935788	XP_019112776.1	uncharacterized protein CXorf38 homolog [Larimichthys crocea]	-	-	-	-	-	-	-	-	-	sp|Q8TB03|CX038_HUMAN;sp|Q8C5K5|CX038_MOUSE	Uncharacterized protein CXorf38 OS=Homo sapiens OX=9606 GN=CXorf38 PE=1 SV=1;Uncharacterized protein CXorf38 homolog OS=Mus musculus OX=10090 PE=1 SV=1
gene17233	1719	5.8	12.53	5.31	0.32	0.59	1.58	-2.7467	6.6469e-07	1.28458e-05	LOC104933177	XP_027131320.1	protein NLRC3 [Larimichthys crocea]	-	-	-	-	-	-	-	-	-	sp|Q5DU56|NLRC3_MOUSE	Protein NLRC3 OS=Mus musculus OX=10090 GN=Nlrc3 PE=1 SV=2
gene7020	4598	15.61	14.48	7.38	3.25	1.42	4.25	-1.43795	0.000245047	0.00197697	dedd2	XP_019116818.1;KAE8289004.1;XP_027145534.1	DNA-binding death effector domain-containing protein 2 isoform X4 [Larimichthys crocea];DNA-binding death effector domain-containing protein 2 [Larimichthys crocea];DNA-binding death effector domain-containing protein 2 isoform X3 [Larimichthys crocea]	GO:0006915;GO:0005730;GO:0042981;GO:0003677	apoptotic process;nucleolus;regulation of apoptotic process;DNA binding	-	-	-	-	-	-	-	sp|Q8QZV0|DEDD2_MOUSE;sp|O75618|DEDD_HUMAN	DNA-binding death effector domain-containing protein 2 OS=Mus musculus OX=10090 GN=Dedd2 PE=2 SV=1;Death effector domain-containing protein OS=Homo sapiens OX=9606 GN=DEDD PE=1 SV=1
gene8892	2981	4.29	4.1	4.66	1.26	0.54	1.71	-1.69376	0.000146527	0.00129378	LOC104924290	XP_010735895.3	putative ZDHHC-type palmitoyltransferase 6 isoform X1 [Larimichthys crocea]	GO:0000139;GO:0016021;GO:0019706;GO:0030659	Golgi membrane;integral component of membrane;protein-cysteine S-palmitoyltransferase activity;cytoplasmic vesicle membrane	K20032	ZDHHC13_17,HIP14	http://www.genome.jp/dbget-bin/www_bget?ko:K20032	-	-	-	-	-	-
gene9027	1568	8.25	15.11	5.55	1.96	0.85	3.19	-2.12201	4.8316e-06	7.08749e-05	LOC104924422	XP_010736063.3;TKS65417.1	caspase-8-like isoform X1 [Larimichthys crocea];Craniofacial development protein 2 p97 bucentaur protein [Collichthys lucidus]	GO:0042981;GO:0097199	regulation of apoptotic process;cysteine-type endopeptidase activity involved in apoptotic signaling pathway	K05695;K04398	PTPRF,LAR;CASP8	http://www.genome.jp/dbget-bin/www_bget?ko:K05695;http://www.genome.jp/dbget-bin/www_bget?ko:K04398	Apoptosis;Apoptosis - fly;Apoptosis - multiple species;Necroptosis;p53 signaling pathway;TNF signaling pathway;Pathways in cancer;Viral carcinogenesis;Lipid and atherosclerosis;Viral myocarditis;Platinum drug resistance;Alcoholic liver disease;Non-alcoholic fatty liver disease;Legionellosis;Pathogenic Escherichia coli infection;Salmonella infection;Tuberculosis;Chagas disease;Toxoplasmosis;Epstei…	ko04210,ko04214,ko04215,ko04217,ko04115,ko04668,ko05200,ko05203,ko05417,ko05416,ko01524,ko04936,ko04932,ko05134,ko05130,ko05132,ko05152,ko05142,ko05145,ko05169,ko05161,ko05160,ko05168,ko05163,ko05170,ko05165,ko05164,ko05167,ko05162,ko05010,ko05016,ko05022,ko04625,ko04657,ko04621,ko04622,ko04624,ko04620,ko04520,ko04514,ko04931,ko04910	-	-	sp|O89110|CASP8_MOUSE;sp|Q14790|CASP8_HUMAN	Caspase-8 OS=Mus musculus OX=10090 GN=Casp8 PE=1 SV=1;Caspase-8 OS=Homo sapiens OX=9606 GN=CASP8 PE=1 SV=1
gene2349	1815	3	2.34	2.51	0.5	0.44	0.98	-1.68802	0.00048454	0.00352569	ttc38	XP_019118239.1	tetratricopeptide repeat protein 38 [Larimichthys crocea]	-	-	K24942	TTC38	http://www.genome.jp/dbget-bin/www_bget?ko:K24942	-	-	-	-	sp|A3KPN8|TTC38_DANRE	Tetratricopeptide repeat protein 38 OS=Danio rerio OX=7955 GN=ttc38 PE=3 SV=1
novel.14118	590	7.72	13.58	5.21	0.96	0.33	2.44	-2.55126	0.00032167	0.00250147	CRIP1	XP_019133690.1	cysteine-rich protein 1 [Larimichthys crocea]	-	-	-	-	-	-	-	KOG1700	Regulatory protein MLP and related LIM proteins	sp|Q56K04|CRIP1_BOVIN	Cysteine-rich protein 1 OS=Bos taurus OX=9913 GN=CRIP1 PE=3 SV=3
gene10753	3836	1.71	1.41	0.77	0.23	0.22	0.3	-1.93741	0.00020952	0.00174431	diaph3	XP_019117859.1	protein diaphanous homolog 3 isoform X2 [Larimichthys crocea]	-	-	K05745	DIAPH3,DRF3	http://www.genome.jp/dbget-bin/www_bget?ko:K05745	Regulation of actin cytoskeleton	ko04810	KOG1924	RhoA GTPase effector DIA/Diaphanous	sp|Q9NSV4|DIAP3_HUMAN	Protein diaphanous homolog 3 OS=Homo sapiens OX=9606 GN=DIAPH3 PE=1 SV=4
novel.16759	518	2.62	5.95	0.68	0	0	0	-5.72635	0.00130858	0.00809444	PLA2G4F	XP_027140876.1	cytosolic phospholipase A2 gamma [Larimichthys crocea]	GO:0004620;GO:0009395	phospholipase activity;phospholipid catabolic process	K16342	PLA2G4,CPLA2	http://www.genome.jp/dbget-bin/www_bget?ko:K16342	Necroptosis;MAPK signaling pathway;Phospholipase D signaling pathway;Ras signaling pathway;VEGF signaling pathway;Choline metabolism in cancer;Arachidonic acid metabolism;Ether lipid metabolism;Glycerophospholipid metabolism;Linoleic acid metabolism;alpha-Linolenic acid metabolism;Vascular smooth muscle contraction;GnRH signaling pathway;Ovarian steroidogenesis;Oxytocin signaling pathway;Fc epsil…	ko04217,ko04010,ko04072,ko04014,ko04370,ko05231,ko00590,ko00565,ko00564,ko00591,ko00592,ko04270,ko04912,ko04913,ko04921,ko04664,ko04666,ko04611,ko04724,ko04730,ko04726,ko04750	-	-	sp|Q68DD2|PA24F_HUMAN	Cytosolic phospholipase A2 zeta OS=Homo sapiens OX=9606 GN=PLA2G4F PE=1 SV=3
gene13275	1503	9.06	5.95	7.59	1.23	0.81	1.59	-2.28451	8.67423e-08	2.16807e-06	LOC104928955	TMS07735.1;XP_010741664.3	CapZ-interacting protein [Larimichthys crocea];capZ-interacting protein isoform X1 [Larimichthys crocea]	GO:0016301	kinase activity	K18615	RCSD1,CAPZIP	http://www.genome.jp/dbget-bin/www_bget?ko:K18615	-	-	-	-	sp|Q3UZA1|CPZIP_MOUSE	CapZ-interacting protein OS=Mus musculus OX=10090 GN=Rcsd1 PE=1 SV=1
novel.5891	2049	2.54	2.76	2.14	0.47	0.3	1.39	-1.55571	0.00246254	0.0136523	-	-	-	-	-	-	-	-	-	-	-	-	-	-
gene12712	1145	0.34	0.99	0.48	0	0	0.06	-4.34267	0.0104487	0.0436775	LOC104928364	KAE8292737.1	hypothetical protein D5F01_LYC07829 [Larimichthys crocea]	GO:0016021	integral component of membrane	K06719	CD300	http://www.genome.jp/dbget-bin/www_bget?ko:K06719	-	-	-	-	-	-
gene22676	6411	21.73	25.42	20	7.25	4.58	11.98	-1.18614	3.79234e-05	0.000413742	LOC104938972	KAE8284576.1;XP_010753736.1	Signal transducer and activator of transcription 5B [Larimichthys crocea];signal transducer and activator of transcription 5B [Larimichthys crocea]	GO:0003700;GO:0007165;GO:0005737;GO:0005634;GO:0003677	DNA-binding transcription factor activity;signal transduction;cytoplasm;nucleus;DNA binding	K11224	STAT5B	http://www.genome.jp/dbget-bin/www_bget?ko:K11224	Necroptosis;ErbB signaling pathway;JAK-STAT signaling pathway;Chemical carcinogenesis - receptor activation;Pathways in cancer;Viral carcinogenesis;Acute myeloid leukemia;Chronic myeloid leukemia;Non-small cell lung cancer;AGE-RAGE signaling pathway in diabetic complications;Hepatitis B;Human T-cell leukemia virus 1 infection;Measles;Growth hormone synthesis, secretion and action;Prolactin signal…	ko04217,ko04012,ko04630,ko05207,ko05200,ko05203,ko05221,ko05220,ko05223,ko04933,ko05161,ko05166,ko05162,ko04935,ko04917,ko04062,ko04658,ko04659	KOG3667	STAT protein	sp|Q9TUZ0|STA5B_PIG;sp|P51692|STA5B_HUMAN	Signal transducer and activator of transcription 5B OS=Sus scrofa OX=9823 GN=STAT5B PE=2 SV=1;Signal transducer and activator of transcription 5B OS=Homo sapiens OX=9606 GN=STAT5B PE=1 SV=2
gene478	2822	4.28	13.52	2.93	0.83	0.77	1.8	-2.2423	9.60874e-05	0.000908303	LOC104920081	XP_019109595.1;XP_010730541.2	multiple C2 and transmembrane domain-containing protein 2 isoform X2 [Larimichthys crocea];multiple C2 and transmembrane domain-containing protein 2 isoform X1 [Larimichthys crocea]	GO:0016021	integral component of membrane	-	-	-	-	-	KOG1030	Predicted Ca2+-dependent phospholipid-binding protein	sp|Q5RJH2|MCTP2_MOUSE	Multiple C2 and transmembrane domain-containing protein 2 OS=Mus musculus OX=10090 GN=Mctp2 PE=2 SV=1
gene11582	4783	10	15.69	7.96	1.22	1.76	7.21	-1.52804	0.00283207	0.0152538	LOC104927144	XP_010739464.2;XP_010739463.2	ephrin type-A receptor 2 isoform X2 [Larimichthys crocea];ephrin type-A receptor 2 isoform X1 [Larimichthys crocea]	GO:0005887;GO:0005003;GO:0005524	integral component of plasma membrane;ephrin receptor activity;ATP binding	K05103	EPHA2,ECK	http://www.genome.jp/dbget-bin/www_bget?ko:K05103	MAPK signaling pathway;PI3K-Akt signaling pathway;Rap1 signaling pathway;Ras signaling pathway;Axon guidance	ko04010,ko04151,ko04015,ko04014,ko04360	-	-	sp|P29317|EPHA2_HUMAN	Ephrin type-A receptor 2 OS=Homo sapiens OX=9606 GN=EPHA2 PE=1 SV=2
gene11747	2148	6.42	8.29	4.46	1.3	1.48	2.03	-1.55743	0.000131387	0.00117986	LOC104927331	KAE8289025.1	Zinc-binding protein A33 [Larimichthys crocea]	GO:0008270	zinc ion binding	-	-	-	-	-	-	-	sp|Q02084|A33_PLEWA	Zinc-binding protein A33 OS=Pleurodeles waltl OX=8319 PE=1 SV=2
gene23406	842	5.54	12.13	4.62	0.82	1.38	3.97	-1.56604	0.0114443	0.0470474	LOC104939747	XP_027143437.1	butyrophilin subfamily 1 member A1-like [Larimichthys crocea]	GO:0016021;GO:0005886	integral component of membrane;plasma membrane	K06712	BTN,CD277	http://www.genome.jp/dbget-bin/www_bget?ko:K06712	-	-	-	-	sp|P78410|BT3A2_HUMAN	Butyrophilin subfamily 3 member A2 OS=Homo sapiens OX=9606 GN=BTN3A2 PE=1 SV=2
gene6336	796	14.27	27.9	9.65	1.9	2.5	7.22	-1.83787	0.000604062	0.00423821	mgst2	XP_010732355.2	microsomal glutathione S-transferase 2 [Larimichthys crocea]	GO:0008047;GO:0019370;GO:0016021;GO:0005789;GO:0016740	enzyme activator activity;leukotriene biosynthetic process;integral component of membrane;endoplasmic reticulum membrane;transferase activity	K00799	GST,gst	http://www.genome.jp/dbget-bin/www_bget?ko:K00799	Chemical carcinogenesis - DNA adducts;Chemical carcinogenesis - reactive oxygen species;Chemical carcinogenesis - receptor activation;Pathways in cancer;Hepatocellular carcinoma;Fluid shear stress and atherosclerosis;Platinum drug resistance;Glutathione metabolism;Drug metabolism - cytochrome P450;Drug metabolism - other enzymes;Metabolism of xenobiotics by cytochrome P450;Longevity regulating pa…	ko05204,ko05208,ko05207,ko05200,ko05225,ko05418,ko01524,ko00480,ko00982,ko00983,ko00980,ko04212	-	-	sp|Q99735|MGST2_HUMAN	Microsomal glutathione S-transferase 2 OS=Homo sapiens OX=9606 GN=MGST2 PE=1 SV=1
novel.20144	1358	20.08	10.82	12.16	4.1	2.3	6.15	-1.44379	0.000429479	0.00319447	-	-	-	-	-	-	-	-	-	-	-	-	-	-
[truncated: 2,375 more rows]
